# Supplementary material for: Studying the functional connectivity of the primary motor cortex with the binarized cross recurrence plot: The influence of Parkinson’s disease
Source: PubMed Central journal article supplement (PMC8183987; doi:10.1371/journal.pone.0252565), 2021-06-07
Supplement: pone.0252565.s001.pdf [file pone.0252565.s001.pdf]

| <b>M1</b>  | <b>S1</b>  | <b>MT</b>  | <b>PCn</b> |
|------------|------------|------------|------------|
| 99.6949343 | 100.009844 | 100.179305 | 99.4657877 |
| 99.6290459 | 99.9042568 | 100.218145 | 99.1949489 |
| 99.5506563 | 99.8268081 | 100.063196 | 99.1550466 |
| 99.6291929 | 99.8629866 | 100.130245 | 99.3704898 |
| 99.4978573 | 99.7015235 | 100.505557 | 99.4447403 |
| 99.6125738 | 99.6033057 | 100.308089 | 99.6259815 |
| 99.5150648 | 99.6544915 | 100.029467 | 99.8446404 |
| 99.4878564 | 99.7918356 | 99.5713651 | 100.245125 |
| 99.5674225 | 99.8230563 | 99.4624102 | 100.209754 |
| 99.6709615 | 99.899701  | 99.6633534 | 100.097647 |
| 99.6562543 | 99.688392  | 99.5143324 | 100.24191  |
| 99.613015  | 99.7607489 | 99.4848962 | 99.9222525 |
| 99.6868453 | 99.9163163 | 99.5889451 | 99.83894   |
| 99.4447642 | 100.033427 | 99.7678112 | 99.8912661 |
| 99.6084557 | 100.095467 | 99.6909499 | 99.8224237 |
| 99.6878748 | 99.8312299 | 99.8313853 | 100.183445 |
| 99.3557854 | 99.8227883 | 100.077301 | 100.334284 |
| 99.3929947 | 100.018286 | 99.94218   | 100.368194 |
| 99.5983077 | 100.228791 | 99.9832681 | 100.186222 |
| 99.5505092 | 100.248488 | 99.9442242 | 100.268073 |
| 99.5965429 | 100.238707 | 99.6645799 | 100.385879 |
| 99.4680016 | 100.166886 | 100.080776 | 100.113287 |
| 99.5577158 | 99.970182  | 100.103466 | 100.181983 |
| 99.5621279 | 99.8408775 | 99.7434854 | 99.9653704 |
| 99.6325756 | 100.055804 | 99.8957771 | 99.5546543 |
| 99.7737651 | 100.190603 | 99.790706  | 99.8222775 |
| 100.238661 | 99.7890217 | 100.188913 | 100.182421 |
| 100.261751 | 100.367073 | 99.9808151 | 99.7738978 |
| 100.167478 | 100.597275 | 99.8317941 | 99.6226198 |
| 100.146299 | 100.414641 | 100.21283  | 99.3984068 |
| 100.275723 | 100.321247 | 100.660915 | 99.5920719 |
| 100.272341 | 100.05701  | 100.900289 | 99.7749209 |
| 100.170861 | 100.10029  | 100.372685 | 99.8494637 |
| 100.089088 | 100.261352 | 99.9360475 | 99.8770884 |
| 100.177479 | 100.252508 | 99.7612698 | 99.8336782 |
| 100.07041  | 100.249158 | 99.8436504 | 99.5685398 |
| 100.141005 | 100.279709 | 99.7847779 | 99.7974299 |
| 100.101148 | 100.297798 | 99.8450813 | 100.133457 |
| 100.003345 | 100.38677  | 99.9474949 | 100.19163  |
| 100.183656 | 100.404591 | 99.9333901 | 99.7456885 |
| 100.164389 | 100.281317 | 99.9041582 | 99.7553352 |
| 100.062174 | 100.203868 | 99.8781971 | 99.6717303 |
| 100.138211 | 100.197704 | 100.034782 | 99.6167733 |
| 100.10659  | 100.139283 | 99.9908316 | 100.016966 |
| 99.9542229 | 99.8570908 | 99.9215338 | 100.394941 |

99.9770192 99.8423515 100.091814 100.380325  
100.160566 99.922614 100.232045 100.117233  
100.089971 100.16434 100.125952 99.6403054  
100.269105 100.186717 100.579352 99.748904  
100.328081 100.217535 100.266183 99.6468828  
100.153506 100.296458 99.9368652 99.6230583  
100.062762 100.25693 99.7929546 100.146758  
100.270723 100.285337 99.8516227 100.300959  
100.274105 100.362383 100.130654 100.184614  
100.214247 100.055 99.966097 100.328291  
100.198363 99.9369514 99.930937 100.339838  
100.009081 99.9341375 100.104897 100.342469  
100.218953 99.8222523 100.034373 100.487901  
100.2819 99.5856184 100.084455 100.830651  
99.9936383 99.5838765 100.053997 100.786218  
99.7830307 99.8420835 99.9867433 100.694866  
99.7745005 100.015204 99.8743132 100.710944  
99.9130427 100.020966 99.8342472 100.792211  
99.8774511 99.8473092 99.7606565 100.694136  
100.103501 99.9514228 99.7716951 100.375063  
100.140564 100.10699 100.023539 99.8215467  
100.060703 100.089571 99.894755 99.6066881  
100.016435 100.031149 99.6817511 99.7147021  
100.211453 100.165948 100.108168 99.5112441  
100.243073 100.074296 100.58712 99.1557774  
100.303226 99.9758098 100.338547 99.2757767  
100.212629 100.003145 99.7849823 99.9259066  
99.9226024 99.8025552 99.9493347 100.325807  
99.9881967 99.6317125 100.06708 100.257695  
100.068057 99.5758368 100.121251 100.581591  
99.6414 99.6313105 100.015975 100.565659  
99.8431833 99.6256827 99.9857212 100.43309  
99.9370155 99.7500294 100.16377 100.282981  
100.026141 99.7322082 99.8342472 100.354016  
100.07394 99.5785167 99.9370696 100.494332  
100.140858 99.6590473 100.547667 100.322591  
100.236896 99.7938455 100.47101 99.873142  
100.309697 100.139417 100.238178 99.4119999  
100.136446 100.265773 100.00739 99.30764  
100.35426 100.39414 100.059516 98.8804076  
100.417501 100.099486 100.015771 99.1522695  
99.9568702 100.040931 100.048886 99.4581872  
100.113502 99.853473 100.354492 99.7617663  
100.079087 99.9088126 100.029467 99.5857869  
100.019817 100.073626 99.9295061 99.4521946  
100.142034 100.141159 99.8845341 99.1212831

|            |            |            |            |
|------------|------------|------------|------------|
| 100.222924 | 100.129099 | 100.180123 | 98.9885677 |
| 100.305726 | 100.120524 | 100.49227  | 99.1625009 |
| 100.101589 | 99.875448  | 100.033351 | 99.99738   |
| 100.205128 | 99.7390419 | 100.045411 | 100.378133 |
| 100.231013 | 99.5084377 | 100.05645  | 100.635525 |
| 99.8373004 | 99.5054898 | 99.850805  | 100.704075 |
| 100.133357 | 99.6705708 | 99.9417712 | 100.485708 |
| 100.092765 | 99.6031717 | 99.9006831 | 100.389972 |
| 100.16939  | 99.8404755 | 100.249421 | 100.177744 |
| 100.420097 | 99.7294108 | 100.375056 | 100.386493 |
| 100.438526 | 99.6981721 | 100.022537 | 100.366143 |
| 100.420835 | 99.8071722 | 100.128599 | 100.469652 |
| 100.22122  | 99.8616052 | 100.071378 | 100.571989 |
| 100.50413  | 99.9786495 | 99.9773733 | 100.69292  |
| 100.468895 | 100.132295 | 99.9230138 | 100.441835 |
| 100.487619 | 100.074511 | 100.138817 | 100.358676 |
| 100.488651 | 100.153345 | 100.489702 | 99.8909105 |
| 100.245693 | 99.9962128 | 99.9311881 | 99.9737761 |
| 100.417296 | 100.019407 | 100.046855 | 99.6647139 |
| 100.667478 | 100.054802 | 100.244675 | 99.5953177 |
| 100.487913 | 100.24277  | 100.063    | 99.4421775 |
| 100.27046  | 100.388238 | 100.148831 | 99.5101096 |
| 100.367172 | 100.240893 | 100.088136 | 99.3518452 |
| 100.496612 | 100.109101 | 99.988613  | 99.5988314 |
| 100.468601 | 99.8953912 | 99.8075509 | 100.096757 |
| 100.425995 | 99.9285068 | 100.195424 | 99.9947121 |
| 100.421424 | 99.8755486 | 100.496241 | 99.6982408 |
| 100.34491  | 99.9395006 | 99.953872  | 99.8401078 |
| 100.371742 | 99.7406728 | 100.093041 | 100.001447 |
| 100.306432 | 99.8746101 | 99.7766926 | 99.9254622 |
| 100.313214 | 99.9086642 | 100.092632 | 99.9267799 |
| 100.556909 | 100.306454 | 99.8766242 | 99.9827068 |
| 100.244513 | 100.463988 | 99.8512837 | 99.7702723 |
| 100.01615  | 100.126128 | 100.149648 | 99.7510932 |
| 99.77275   | 100.295192 | 99.8811201 | 100.079627 |
| 99.7619879 | 100.092074 | 99.996583  | 100.038487 |
| 99.8529497 | 100.202683 | 99.8911337 | 99.9007197 |
| 99.8878897 | 100.131089 | 99.9485586 | 99.6172785 |
| 99.8581096 | 99.9023629 | 99.5488323 | 100.019455 |
| 99.868282  | 99.9746273 | 99.9174961 | 99.8680713 |
| 99.8073951 | 99.9228758 | 100.464974 | 99.8859327 |
| 99.8040043 | 99.9086642 | 100.09161  | 99.9619172 |
| 99.6670455 | 99.7483148 | 99.9969917 | 99.9269263 |
| 99.9375722 | 99.8925757 | 100.171514 | 99.7035114 |
| 100.010106 | 99.8931119 | 100.255302 | 99.641289  |
| 99.8920176 | 100.02048  | 100.032959 | 99.9603068 |

99.9136892 100.025038 99.8525099 100.232475  
100.022932 100.057349 99.7670878 100.000275  
100.041213 99.9600136 100.158027 99.8427431  
99.8743265 99.9145634 100.052782 99.8382045  
99.9663203 100.13739 100.079144 99.9076008  
99.8281821 100.209118 99.9465151 99.8168293  
99.9130995 100.206839 99.9005343 100.085923  
99.9467126 100.266367 100.068109 99.9573787  
99.8323101 100.197052 100.090384 100.066012  
99.7782047 100.442402 99.8991037 100.060155  
99.8949661 100.487316 99.8514881 99.4538899  
99.9495137 100.310342 99.9187222 99.4417382  
99.8249388 100.28755 99.9031909 99.8364477  
99.8006135 100.372015 99.9724687 99.4721906  
99.8814029 100.245854 100.028667 99.2294502  
100.183774 100.302298 100.239157 99.3487707  
100.074384 100.173455 100.094471 99.814926  
99.8626798 100.049573 99.5935869 100.201876  
99.7963381 99.9825376 99.7221288 100.155905  
99.8458733 99.925155 100.046651 99.9383459  
99.8466104 99.6183996 99.9687902 99.8740739  
99.8948187 99.8295621 100.162931 99.7169807  
99.8137344 100.220648 100.082823 99.6726198  
99.8917227 100.34681 99.845766 99.7259115  
99.9400785 100.32214 99.7854801 99.8302986  
99.9810629 100.43342 100.019676 99.7354278  
99.77275 100.206169 99.9070737 99.4773148  
99.8020877 100.090867 99.8888858 99.5342666  
99.8339318 100.188739 99.9121827 99.4714586  
99.8616478 99.9109434 100.077101 99.4493513  
100.054923 99.8129372 100.12206 99.8124371  
100.054334 99.8498069 99.9712425 99.776275  
100.184216 99.853829 99.9438584 99.6970696  
100.082492 99.9070554 99.652851 100.028825  
100.324565 99.8756827 99.8236952 100.234378  
100.010843 99.718551 100.078327 100.471994  
100.021163 99.8010049 100.078531 100.49293  
99.9108881 99.9743592 100.214021 100.529092  
100.040918 99.9065191 99.911774 100.743577  
99.8881845 99.8784982 100.359933 100.516648  
99.8283296 100.059226 100.328871 100.165421  
99.901158 100.029865 99.8120468 99.5535921  
100.00642 100.003989 99.9085043 99.1921167  
100.008779 100.208582 99.7695401 99.6083478  
100.153109 100.08765 99.6861616 100.195434  
100.010401 99.8337183 100.258163 100.411529

|            |            |            |            |
|------------|------------|------------|------------|
| 99.8219903 | 99.6312705 | 100.318857 | 100.772565 |
| 99.7581548 | 99.5992274 | 100.016406 | 100.87783  |
| 100.119791 | 99.6051266 | 100.019471 | 101.079138 |
| 100.059936 | 99.620947  | 100.026624 | 100.939614 |
| 99.8330472 | 99.6548671 | 99.7053713 | 100.726154 |
| 99.8507383 | 99.5305829 | 99.7464475 | 100.616936 |
| 99.7083248 | 99.6853013 | 99.8061204 | 100.431293 |
| 99.8625324 | 99.6456161 | 99.9078912 | 100.605077 |
| 99.7114208 | 99.7951057 | 100.12819  | 100.804335 |
| 99.646111  | 99.8378745 | 100.034389 | 100.820732 |
| 99.836438  | 99.7833075 | 99.499173  | 100.775493 |
| 99.8777173 | 99.6977699 | 100.019471 | 100.705218 |
| 99.8432196 | 99.5414427 | 100.364838 | 100.604345 |
| 99.730881  | 99.7821008 | 100.05973  | 100.627331 |
| 99.692108  | 99.8699176 | 100.060752 | 100.031753 |
| 99.7780573 | 99.8755486 | 99.9013517 | 99.9862206 |
| 99.4205003 | 99.9255096 | 100.078054 | 100.009175 |
| 99.4923777 | 99.8680691 | 100.064145 | 100.318074 |
| 99.590272  | 99.8820266 | 100.107714 | 100.5092   |
| 99.5408838 | 99.7166839 | 100.027941 | 100.682352 |
| 99.614966  | 99.7354729 | 100.089304 | 100.82219  |
| 99.5494092 | 99.6326705 | 100.2601   | 100.662772 |
| 99.5505851 | 99.673872  | 99.865941  | 100.805824 |
| 99.6640602 | 99.6579014 | 100.159873 | 100.58489  |
| 99.6681759 | 99.7101078 | 100.1791   | 100.560196 |
| 99.3082011 | 99.7326545 | 100.058623 | 100.474423 |
| 99.5220693 | 99.8131786 | 100.038782 | 100.554497 |
| 99.666265  | 99.8622982 | 100.045736 | 100.470185 |
| 99.5420598 | 99.9837553 | 99.9964409 | 100.535355 |
| 99.4937005 | 99.8463276 | 99.5623959 | 100.712892 |
| 99.6446577 | 99.9354409 | 99.9223955 | 100.396979 |
| 99.9073261 | 100.063743 | 100.249668 | 99.9193107 |
| 100.216443 | 100.229891 | 100.494918 | 99.4771497 |
| 100.284498 | 100.169632 | 100.524577 | 99.0538384 |
| 100.036088 | 100.093134 | 100.084395 | 99.4306834 |
| 100.109435 | 100.119573 | 100.0486   | 99.4369666 |
| 100.278766 | 100.014086 | 100.232691 | 99.0535461 |
| 100.078862 | 100.056495 | 100.139213 | 99.3399425 |
| 99.9321671 | 100.10226  | 100.127964 | 99.5402738 |
| 100.166467 | 99.969932  | 100.114054 | 99.5822104 |
| 100.11605  | 100.073942 | 100.181759 | 99.6283846 |
| 99.9142346 | 100.129101 | 100.025895 | 99.8589629 |
| 100.060488 | 100.031399 | 99.5707823 | 100.06207  |
| 99.9930204 | 99.9069891 | 100.020168 | 99.9191645 |
| 100.17705  | 99.9355751 | 100.409622 | 99.862762  |
| 100.174404 | 100.142253 | 100.196895 | 99.9478042 |

|            |            |            |            |
|------------|------------|------------|------------|
| 00.310809  | 100.275789 | 100.222668 | 99.7259931 |
| 100.246281 | 100.403554 | 100.007691 | 99.1185698 |
| 100.125016 | 100.322493 | 99.9330319 | 99.0858388 |
| 100.151118 | 99.934233  | 100.062304 | 99.2335667 |
| 100.179402 | 100.023749 | 100.029782 | 99.0924142 |
| 99.8355957 | 100.18171  | 100.027941 | 99.0868616 |
| 100.02183  | 100.265321 | 100.164986 | 99.0696194 |
| 100.138098 | 100.258879 | 100.227782 | 99.2066805 |
| 100.067984 | 100.234722 | 99.8141911 | 99.5979915 |
| 100.049905 | 100.106823 | 99.7464866 | 99.2741882 |
| 100.130602 | 100.249753 | 100.214486 | 98.950385  |
| 99.8691091 | 100.043746 | 100.106895 | 99.1847624 |
| 99.8181041 | 99.9069891 | 99.9211683 | 99.2094568 |
| 100.048288 | 99.8600167 | 99.8810774 | 99.4558161 |
| 99.984789  | 100.046161 | 100.026918 | 99.5379359 |
| 100.127956 | 100.237003 | 99.97885   | 99.5094424 |
| 99.9746468 | 100.238882 | 99.879441  | 99.5760734 |
| 100.132512 | 100.265724 | 100.013009 | 99.5611691 |
| 100.164115 | 100.254719 | 100.068032 | 99.6538095 |
| 100.023594 | 100.164398 | 99.5259869 | 99.7080203 |
| 100.040498 | 100.338061 | 99.8039638 | 99.4993601 |
| 100.362549 | 100.10736  | 99.8745319 | 99.8345607 |
| 100.268771 | 100.021736 | 100.173168 | 99.930562  |
| 99.9752348 | 100.253242 | 99.8258502 | 99.8392366 |
| 100.094148 | 100.227743 | 99.7565093 | 99.8427435 |
| 99.9002706 | 100.139569 | 99.96085   | 99.6764582 |
| 99.9744998 | 100.117023 | 99.9434637 | 99.9876951 |
| 100.135011 | 100.088168 | 99.8465093 | 100.257726 |
| 100.084447 | 99.8790741 | 99.9285319 | 100.410714 |
| 99.9821432 | 99.695345  | 99.9074637 | 100.647576 |
| 99.9167334 | 99.6949424 | 99.703123  | 100.736563 |
| 99.9911095 | 99.6757509 | 99.8962137 | 100.553912 |
| 100.040057 | 99.4944375 | 100.079895 | 100.559903 |
| 99.7857666 | 99.6734693 | 100.075395 | 100.347736 |
| 99.9490708 | 99.7605695 | 99.9843727 | 100.39391  |
| 100.085623 | 99.8005631 | 99.9622819 | 100.404139 |
| 100.119724 | 99.9252412 | 99.7524184 | 100.433655 |
| 99.946131  | 99.8507565 | 99.9140092 | 100.234493 |
| 99.8483837 | 99.6792402 | 99.7395321 | 100.147113 |
| 100.058871 | 99.7050079 | 99.7133503 | 100.135131 |
| 100.044172 | 99.7695614 | 100.175213 | 100.153834 |
| 100.008895 | 99.9975786 | 100.137373 | 100.019111 |
| 99.9533335 | 100.250424 | 99.9596228 | 99.7733362 |
| 100.159411 | 100.220093 | 100.088895 | 99.7229246 |
| 100.193954 | 100.190434 | 99.8970319 | 100.009467 |
| 100.218501 | 100.072869 | 99.9710773 | 100.383244 |

|            |            |            |            |
|------------|------------|------------|------------|
| 100.252455 | 100.151245 | 99.8737138 | 100.600963 |
| 100.270094 | 100.094744 | 99.7139639 | 100.591027 |
| 100.217913 | 100.024286 | 99.6080095 | 100.559757 |
| 100.224674 | 99.8365305 | 100.050441 | 100.691704 |
| 100.093707 | 99.5168501 | 100.023236 | 100.566917 |
| 99.8613187 | 99.6490437 | 100.0126   | 100.618644 |
| 99.7262363 | 99.8210968 | 100.173986 | 100.618498 |
| 99.8132535 | 99.8633719 | 100.053714 | 100.485674 |
| 99.8348608 | 99.7982816 | 100.039395 | 100.117158 |
| 99.7716557 | 99.7871425 | 99.9475546 | 100.297617 |
| 99.7712148 | 99.7513093 | 99.9680091 | 100.4715   |
| 99.7565159 | 99.8758531 | 99.8231911 | 100.338823 |
| 99.7027181 | 99.790095  | 100.048395 | 100.389235 |
| 99.8367716 | 99.8824292 | 100.2196   | 100.109414 |
| 99.9155574 | 99.838141  | 100.140236 | 100.256995 |
| 99.9436322 | 99.7644615 | 100.221645 | 100.392595 |
| 99.9173213 | 99.9281937 | 100.165191 | 100.362787 |
| 100.082242 | 100.106286 | 99.9962364 | 100.219588 |
| 100.003604 | 100.141448 | 99.8608274 | 100.318074 |
| 100.013158 | 99.9872447 | 99.6206913 | 100.555374 |
| 100.106789 | 100.116083 | 99.8180775 | 100.325964 |
| 100.239373 | 100.157016 | 100.025077 | 100.332832 |
| 100.185428 | 100.112728 | 100.197304 | 100.558442 |
| 100.212915 | 100.342356 | 100.182373 | 100.477491 |
| 100.20439  | 100.507296 | 100.042668 | 99.7609159 |
| 100.481933 | 100.243385 | 99.8199728 | 99.3440352 |
| 100.488119 | 100.130072 | 99.6628397 | 99.3106563 |
| 100.623036 | 100.059084 | 99.9370563 | 99.6529367 |
| 100.580175 | 100.050512 | 100.251118 | 99.8032883 |
| 100.411234 | 99.9440304 | 100.081725 | 100.181583 |
| 100.479723 | 99.9496559 | 99.9677065 | 100.109555 |
| 100.525236 | 100.076363 | 99.9875269 | 99.4551519 |
| 100.655588 | 100.186327 | 99.7239356 | 99.5292297 |
| 100.492685 | 100.232536 | 99.9589201 | 99.8129506 |
| 100.440839 | 100.50738  | 99.8222204 | 99.8400344 |
| 100.188678 | 100.341831 | 99.8986415 | 99.8057771 |
| 100.074529 | 100.27245  | 100.373923 | 99.7606862 |
| 99.9643558 | 100.401166 | 99.9946786 | 100.048213 |
| 99.8559504 | 100.142797 | 99.7656198 | 100.440123 |
| 99.906029  | 100.168915 | 99.9066105 | 100.038844 |
| 100.074529 | 100.005241 | 99.9284743 | 99.7333097 |
| 99.7494598 | 100.007786 | 99.9168272 | 99.6694798 |
| 99.7198545 | 100.049843 | 99.9339913 | 99.7394584 |
| 99.7836311 | 99.9898377 | 99.8673783 | 99.9057674 |
| 99.9020522 | 100.109446 | 99.8001523 | 99.9512975 |
| 99.953751  | 100.155119 | 100.418264 | 99.8485255 |

|            |            |            |            |
|------------|------------|------------|------------|
| 100.002062 | 100.143064 | 100.372288 | 99.7562943 |
| 99.8933621 | 100.099668 | 100.077843 | 99.4832605 |
| 99.9530145 | 99.82094   | 99.9425734 | 99.3173906 |
| 100.094413 | 99.7849103 | 99.9646415 | 99.7482423 |
| 99.9170758 | 99.7243697 | 100.016951 | 99.9558358 |
| 99.9861547 | 99.796563  | 99.7858489 | 100.171481 |
| 100.030342 | 99.8579073 | 99.865335  | 100.336766 |
| 100.11194  | 100.066853 | 99.7218923 | 100.145569 |
| 100.066722 | 100.361118 | 99.6742824 | 99.8491111 |
| 99.775972  | 100.146011 | 99.7051369 | 99.9082562 |
| 99.9497741 | 99.7973667 | 99.8755517 | 100.219061 |
| 99.7993911 | 99.6460151 | 99.8536879 | 100.626196 |
| 99.6853887 | 99.7983042 | 100.03718  | 100.761322 |
| 99.7646307 | 99.7219587 | 99.9329696 | 100.86263  |
| 99.9061763 | 99.6445417 | 99.8455146 | 100.671287 |
| 99.7818636 | 99.5573471 | 100.10175  | 100.482725 |
| 99.7562352 | 99.4014416 | 99.9887529 | 100.627367 |
| 99.7441574 | 99.5736877 | 99.7570378 | 100.494144 |
| 99.7223585 | 99.6535157 | 99.9194836 | 100.47482  |
| 99.9232619 | 99.6666417 | 99.8667653 | 100.535575 |
| 99.870974  | 99.6232454 | 100.10175  | 100.315831 |
| 99.8672918 | 99.7577206 | 100.007347 | 100.3618   |
| 99.9088275 | 99.7486127 | 99.8841337 | 100.322418 |
| 100.018853 | 99.681509  | 99.8322328 | 100.229894 |
| 99.8614002 | 99.7057521 | 99.7112669 | 100.288308 |
| 99.8538884 | 99.9784528 | 99.9891616 | 100.165772 |
| 99.7560879 | 100.112526 | 100.189818 | 99.9501263 |
| 99.7600647 | 100.415765 | 100.26297  | 99.6129698 |
| 99.8298801 | 100.10824  | 100.166728 | 99.3535511 |
| 99.7954143 | 100.151503 | 99.9156012 | 99.4223586 |
| 99.9815888 | 100.135564 | 99.7670502 | 99.2188642 |
| 100.149499 | 100.090426 | 99.9491121 | 99.4305569 |
| 100.081157 | 100.031627 | 99.9517684 | 99.3371545 |
| 99.9075019 | 100.125652 | 100.117075 | 99.0701231 |
| 99.8256087 | 100.235751 | 100.123818 | 99.2645407 |
| 100.03476  | 100.407729 | 100.037793 | 99.7299425 |
| 100.078064 | 100.350805 | 100.19084  | 99.5822261 |
| 100.077916 | 100.130742 | 99.8387715 | 99.4674494 |
| 100.03314  | 100.147083 | 99.9227529 | 99.2863541 |
| 99.9951394 | 100.258386 | 99.9758799 | 99.2597095 |
| 100.23699  | 100.339554 | 99.8107777 | 99.6016971 |
| 100.4837   | 100.137841 | 100.1277   | 99.6183866 |
| 100.55543  | 99.9409498 | 99.9811925 | 99.6787029 |
| 100.434358 | 99.8771946 | 100.023898 | 99.565683  |
| 100.183081 | 99.6182896 | 100.088877 | 99.8359352 |
| 100.004861 | 99.7543721 | 100.123614 | 99.9268489 |



|            |            |            |            |
|------------|------------|------------|------------|
| 99.9010212 | 99.8362091 | 99.9916136 | 100.084667 |
| 99.9198743 | 99.8730425 | 100.341638 | 99.9347544 |
| 100.089994 | 99.8849631 | 100.308945 | 100.251708 |
| 99.8447564 | 99.8884455 | 99.8921028 | 100.663381 |
| 99.9868912 | 99.9501916 | 99.9948829 | 100.703641 |
| 99.8942458 | 99.7950897 | 99.9010935 | 100.897912 |
| 99.6915749 | 99.6209684 | 100.049849 | 100.964524 |
| 99.8306166 | 99.7599976 | 100.03861  | 100.905525 |
| 99.855214  | 99.7819636 | 100.074573 | 100.888689 |
| 99.8731834 | 99.754506  | 100.42705  | 100.56544  |
| 99.900432  | 99.871837  | 100.116666 | 100.65123  |
| 99.9734878 | 99.9676037 | 99.9869139 | 100.45813  |
| 100.063924 | 99.9635856 | 99.870239  | 100.286404 |
| 100.202082 | 99.7849103 | 99.7455951 | 100.336766 |
| 100.101041 | 99.7042787 | 100.088059 | 100.408647 |
| 99.8256087 | 99.9327795 | 99.9623938 | 100.15201  |
| 100.086754 | 99.882954  | 100.008982 | 100.133857 |
| 100.054792 | 99.9384049 | 100.297093 | 100.216279 |
| 99.9129516 | 100.037788 | 100.027168 | 100.439245 |
| 100.108847 | 99.7731236 | 99.5780409 | 100.787674 |
| 100.044776 | 99.9276898 | 100.325496 | 100.708765 |
| 100.045954 | 100.226241 | 100.291781 | 100.191977 |
| 100.156569 | 100.397817 | 100.022059 | 99.5915956 |
| 99.9316575 | 100.22758  | 100.030437 | 99.3353977 |
| 99.9955813 | 100.08172  | 99.8526663 | 99.4025947 |
| 100.008101 | 100.259726 | 100.161415 | 99.5848613 |
| 100.047133 | 100.177085 | 100.246623 | 99.426165  |
| 100.38369  | 100.111321 | 100.253162 | 99.5833973 |
| 100.172624 | 100.113866 | 100.042289 | 99.8089978 |
| 100.280145 | 100.304194 | 99.8596136 | 99.7996283 |
| 100.167616 | 100.374914 | 100.066196 | 99.5561671 |
| 99.9832089 | 100.48086  | 100.297911 | 99.5371352 |
| 99.9287117 | 100.539793 | 100.154264 | 99.8394488 |
| 99.7703566 | 99.7518556 | 99.3411605 | 99.9895877 |
| 99.898032  | 99.8537113 | 99.2832731 | 100.058822 |
| 99.9331778 | 99.6814002 | 99.1342668 | 100.08654  |
| 99.8062799 | 99.7084263 | 99.631455  | 100.022849 |
| 99.7873074 | 100.170839 | 99.8134786 | 100.021371 |
| 99.935977  | 100.323466 | 99.7272907 | 99.9988271 |
| 100.107507 | 100.114755 | 99.7298635 | 100.092576 |
| 99.9226029 | 99.6771823 | 99.9337557 | 99.9467169 |
| 99.8316283 | 99.7146751 | 99.8252705 | 99.9688914 |
| 99.6728505 | 99.5512686 | 99.9168183 | 99.8426197 |
| 100.144985 | 99.9260413 | 99.9498355 | 100.003385 |
| 99.9715893 | 99.913075  | 100.229839 | 99.9119767 |
| 99.9132722 | 99.8409012 | 99.9286101 | 99.8666421 |

99.9367545 99.5722022 100.002149 99.9491807  
99.8107897 99.3603674 100.15287 99.8983024  
99.8450024 99.818093 99.8359903 99.8157639  
99.8387819 99.7662279 99.3664594 99.8713234  
99.6874686 99.5226803 99.3846832 100.029995  
99.8047248 99.6048522 99.4785894 100.052785  
99.8089236 99.5584548 99.6724049 100.114874  
99.8454689 99.7373271 99.9084568 100.059068  
99.92929 99.7879425 99.7386538 100.071141  
99.7652247 99.5925108 100.060036 99.9005199  
99.8294512 99.7331091 100.037095 100.018538  
99.9176266 99.7715394 99.9343989 100.00166  
99.8003704 100.015712 100.134003 99.7662407  
99.8117228 100.426571 100.152441 99.7446821  
99.7128171 100.154279 100.427299 99.8066477  
99.8639749 100.011338 100.453241 99.8067708  
100.138609 100.169901 100.404144 99.9601448  
100.144208 100.296284 100.366625 99.9648261  
100.160692 100.174588 100.314312 100.062025  
99.9927389 99.7110821 100.276149 99.8025823  
99.8575989 99.5403332 100.130787 99.8930052  
99.9470183 99.7776319 100.149869 99.9546012  
99.9625696 99.9554107 100.076759 99.9315643  
99.9303785 99.8480873 100.253208 100.023096  
99.9504396 100.017743 100.216546 99.9961168  
99.9692566 100.249574 100.19382 99.9536156  
100.076871 100.26379 100.06218 100.012748  
100.166601 100.31253 100.151584 100.129287  
100.128657 100.575918 100.119424 100.068184  
100.294899 100.599351 100.045886 100.17031  
100.218543 100.59607 100.079975 100.12941  
100.111395 100.332527 100.325031 99.8790845  
100.065052 100.527021 100.166806 99.8610985  
100.19055 100.748698 99.9594834 100.048227  
100.047324 100.461877 99.9309685 100.01361  
99.9656798 100.146156 99.4841638 100.012871  
99.910784 100.01618 99.3971183 100.042067  
100.081847 100.103039 99.6211639 99.9458545  
100.222275 100.015399 99.407195 100.061778  
100.163336 99.6200056 100.112135 100.00745  
99.9045635 99.6484377 100.082548 100.072003  
99.9014533 99.9188552 100.108275 100.200246  
100.044058 99.7476376 100.290942 100.134092  
100.127101 99.8777692 100.197679 100.069662  
100.182775 100.003527 99.8672924 100.174252  
100.251978 99.9935285 100.139149 100.160701

|            |            |            |            |
|------------|------------|------------|------------|
| 100.201125 | 99.952755  | 100.128643 | 100.105388 |
| 100.229584 | 100.098352 | 100.268645 | 100.095286 |
| 100.195682 | 100.415948 | 100.197894 | 100.172774 |
| 100.202058 | 100.25551  | 99.9873551 | 100.198521 |
| 100.198481 | 99.8798001 | 99.9133879 | 100.111671 |
| 100.099109 | 100.021023 | 99.7579496 | 100.074467 |
| 100.166912 | 100.025554 | 99.8775835 | 100.132737 |
| 100.271728 | 100.002433 | 99.9665585 | 100.064735 |
| 100.267995 | 100.09351  | 100.034951 | 100.07767  |
| 100.185729 | 100.004151 | 100.243775 | 99.8949763 |
| 99.7681794 | 99.8063765 | 99.9834959 | 99.9833049 |
| 99.6400374 | 99.677026  | 100.013297 | 99.9775149 |
| 99.7513841 | 99.8155935 | 99.7671687 | 99.9149334 |
| 99.6614981 | 99.869802  | 99.9757776 | 100.025313 |
| 99.6728505 | 99.9835304 | 100.007723 | 99.9170276 |
| 99.782642  | 100.159591 | 99.9453332 | 99.9860151 |
| 100.060231 | 100.029615 | 99.9496211 | 99.8804396 |
| 99.8829473 | 99.8585541 | 100.250207 | 99.6859196 |
| 99.775644  | 99.8357459 | 100.144294 | 99.8112058 |
| 99.9224474 | 100.20755  | 100.108275 | 99.9809642 |
| 99.7770436 | 100.390641 | 100.071399 | 99.8151479 |
| 99.9179376 | 100.416417 | 100.009009 | 99.8353514 |
| 99.9607034 | 100.323466 | 100.150083 | 100.013733 |
| 99.9518392 | 99.9938409 | 99.9914287 | 100.04601  |
| 100.002536 | 100.003839 | 100.071185 | 99.892882  |
| 99.8230752 | 99.6053209 | 99.994859  | 100.052416 |
| 100.048101 | 99.7007715 | 100.070327 | 100.159839 |
| 100.314805 | 100.118661 | 100.097556 | 100.150723 |
| 100.281836 | 100.180056 | 100.182457 | 100.178318 |
| 100.03395  | 99.6698399 | 100.018228 | 100.138157 |
| 100.070028 | 99.6003218 | 99.368389  | 100.104279 |
| 100.055877 | 99.6906172 | 99.2822012 | 100.151215 |
| 100.073139 | 100.137564 | 99.924751  | 100.141237 |
| 100.343108 | 100.565451 | 99.8655772 | 100.098366 |
| 100.44699  | 100.214268 | 99.8745819 | 100.087525 |
| 100.169556 | 100.167402 | 100.274005 | 99.8231554 |
| 99.8516894 | 100.378768 | 99.9509075 | 99.8810556 |
| 100.061475 | 100.573418 | 99.8387775 | 100.012501 |
| 100.081381 | 100.071326 | 100.028305 | 100.021618 |
| 99.8790595 | 99.7413888 | 100.142579 | 100.024821 |
| 100.037526 | 100.044144 | 100.087479 | 100.005972 |
| 100.027407 | 99.912264  | 100.095395 | 100.095192 |
| 100.082296 | 100.064424 | 99.8556008 | 99.9765939 |
| 100.193939 | 100.188464 | 99.9507471 | 100.006644 |
| 99.9858903 | 99.7051142 | 100.009678 | 99.9777023 |
| 99.9056562 | 99.5893541 | 99.6477361 | 99.9616921 |

|            |            |            |            |
|------------|------------|------------|------------|
| 100.034559 | 99.7560424 | 99.484016  | 99.928317  |
| 99.9692526 | 99.9952176 | 99.6263068 | 99.8809022 |
| 100.30154  | 100.355308 | 99.8500292 | 100.111818 |
| 100.21633  | 100.673532 | 100.226757 | 100.209481 |
| 100.435108 | 100.439668 | 99.9108885 | 100.243718 |
| 100.399967 | 100.119414 | 100.275187 | 99.969574  |
| 100.162374 | 100.284384 | 100.267258 | 99.8443251 |
| 100.038602 | 100.528089 | 100.146183 | 99.7642742 |
| 99.9991072 | 100.552304 | 100.025321 | 99.8965429 |
| 100.266554 | 100.689622 | 100.232972 | 99.9461745 |
| 100.330773 | 100.740863 | 100.304974 | 100.050118 |
| 100.481134 | 100.493564 | 100.335618 | 99.9797959 |
| 100.387372 | 100.619635 | 100.379334 | 99.9572585 |
| 100.320355 | 100.847562 | 100.483266 | 99.9876779 |
| 100.279771 | 100.406393 | 100.345476 | 100.068098 |
| 100.296098 | 100.360776 | 100.253758 | 100.056522 |
| 100.409452 | 100.381866 | 100.445122 | 100.276723 |
| 100.216952 | 100.146752 | 100.504481 | 100.19815  |
| 99.9190285 | 99.8828943 | 100.252258 | 100.104429 |
| 99.8653836 | 99.8083766 | 99.825814  | 100.211944 |
| 99.7343034 | 99.65278   | 99.4670868 | 100.192362 |
| 99.7803292 | 99.7929107 | 99.6560936 | 100.120439 |
| 99.6985401 | 99.7491687 | 99.6792373 | 100.194332 |
| 99.9840244 | 99.8252486 | 99.5585901 | 100.199998 |
| 99.8922838 | 99.6852741 | 100.203399 | 99.926716  |
| 99.7750424 | 99.9735028 | 100.126039 | 100.098394 |
| 99.9739174 | 99.7179244 | 99.9670334 | 100.133617 |
| 100.173725 | 99.6354394 | 100.080395 | 100.001348 |
| 99.7196871 | 99.5529544 | 99.988677  | 99.9350905 |
| 99.6554687 | 99.784631  | 100.117253 | 100.108863 |
| 99.7133119 | 99.7393267 | 100.234472 | 100.230171 |
| 100.103598 | 99.8482131 | 100.143397 | 100.236205 |
| 99.7161108 | 99.377049  | 100.120467 | 100.229924 |
| 99.8582309 | 99.474375  | 100.140825 | 100.103074 |
| 99.8339741 | 99.831185  | 100.279688 | 99.9286865 |
| 99.7677343 | 99.632315  | 100.247972 | 99.8099648 |
| 100.158176 | 100.090981 | 100.183041 | 99.8802864 |
| 100.155066 | 100.11504  | 100.207685 | 100.001841 |
| 100.1815   | 100.242829 | 100.026178 | 100.11773  |
| 100.033782 | 99.8411832 | 99.4310855 | 100.097902 |
| 99.8761126 | 99.7583858 | 99.3325105 | 99.8679709 |
| 99.8353735 | 99.7826001 | 99.5142313 | 99.8587343 |
| 99.9967748 | 100.058644 | 99.6599509 | 99.8857053 |
| 99.7797072 | 99.9480387 | 99.5650189 | 99.8121816 |
| 100.009525 | 100.110509 | 99.4600151 | 99.8762223 |
| 99.6982291 | 99.7672904 | 99.7561686 | 99.8136594 |

99.9992627 100.046927 99.6314498 100.139528  
99.8754906 99.5884167 99.723596 99.9943282  
100.081674 99.7754139 99.4880875 100.053935  
99.8658501 99.4121988 99.5069454 99.9460514  
99.8919728 99.8610233 99.5750907 99.8880452  
99.9193395 99.8719588 100.028536 99.7913683  
99.84688 99.8613357 99.5095169 99.9019618  
99.8622738 100.289695 99.6543792 100.068098  
100.012013 100.411704 99.5313748 100.167731  
100.044666 100.379054 99.55709 99.8825032  
100.118214 100.793353 99.351154 99.8499902  
99.9812255 100.528558 99.4640867 99.925115  
100.06628 100.177841 99.5219459 99.8571333  
99.9515265 99.8289979 99.51766 99.8405073  
100.006104 99.6743386 99.6438789 99.8692025  
100.164551 99.9444456 99.6230924 99.9826285  
100.113239 99.6618408 99.9027453 100.148149  
100.196738 99.9795955 100.024893 100.174997  
99.9327119 100.239704 99.995963 100.232141  
100.088049 100.107853 100.076109 100.157263  
100.105464 99.9752212 99.9991774 100.069576  
100.072033 99.6071633 100.172755 100.145193  
100.340258 99.7493249 100.021892 100.072901  
100.471804 100.123475 99.9918914 99.9099669  
100.483622 100.474505 100.278616 99.9975303  
100.072655 100.755392 100.190327 99.8587343  
99.7952565 100.275323 100.108038 99.7985113  
99.7817286 99.9908434 100.062394 99.8030681  
99.7640025 99.7840061 100.160969 99.7368105  
99.7588712 99.7416701 100.348904 99.7518355  
99.7290167 99.7555738 100.089181 99.8471577  
99.7571608 99.7251106 100.492052 100.01859  
99.8047415 99.8568053 100.192684 100.047778  
99.7520296 99.5895103 100.350404 100.012432  
99.8106502 99.6546547 100.226328 100.000486  
99.7943235 99.6015393 100.204471 100.07401  
99.8530997 99.5804494 100.331761 100.082015  
100.127389 99.8725837 100.296617 100.214776  
100.050575 99.7782259 100.243472 100.100981  
99.6809695 99.4462551 100.264687 99.9201888  
99.83584 99.4978082 100.266401 99.8921094  
99.8143821 99.8483694 100.046965 99.9275781  
99.888863 99.9541313 100.310117 99.9912494  
99.8224677 99.8321223 100.215614 100.076596  
100.106086 100.063643 100.134611 99.9193267  
100.043578 100.219083 100.281616 99.928317

|            |            |            |            |
|------------|------------|------------|------------|
| 100.12148  | 100.368275 | 100.277759 | 99.8283149 |
| 99.9439073 | 100.130662 | 100.275187 | 99.6843464 |
| 99.5285439 | 99.7889922 | 100.282662 | 99.7793887 |
| 99.6188633 | 99.954845  | 100.373371 | 99.8182852 |
| 99.594654  | 100.254596 | 100.377874 | 99.6737772 |
| 99.5879809 | 100.010805 | 100.368653 | 99.7992062 |
| 99.7931394 | 99.8120619 | 100.469656 | 99.7836968 |
| 99.7529457 | 99.7590638 | 100.300461 | 99.666638  |
| 99.5010757 | 99.5020232 | 100.392885 | 99.7323682 |
| 99.3851503 | 99.7620255 | 100.174583 | 99.7018418 |
| 99.4593301 | 99.5847937 | 100.137485 | 99.666638  |
| 99.8198317 | 99.684243  | 100.097384 | 99.959962  |
| 99.9196175 | 99.775275  | 100.426553 | 99.980395  |
| 100.033836 | 100.037148 | 100.065218 | 100.02003  |
| 100.000626 | 99.9737061 | 99.7757204 | 100.082067 |
| 99.6193289 | 99.3880773 | 99.9494187 | 99.8113921 |
| 99.6002408 | 99.4710037 | 99.8078868 | 99.8587818 |
| 99.9553108 | 99.5910288 | 100.328553 | 99.9541768 |
| 100.228907 | 99.8371581 | 100.085161 | 100.00846  |
| 100.240701 | 100.133012 | 100.003673 | 99.9252506 |
| 100.121827 | 100.345784 | 100.020185 | 99.8288709 |
| 100.028404 | 100.286083 | 99.743983  | 99.7381534 |
| 99.8580079 | 100.08204  | 99.8473442 | 99.7775423 |
| 99.8272807 | 99.9115113 | 99.6202497 | 99.8804457 |
| 99.988521  | 100.091393 | 99.5835801 | 99.8742912 |
| 100.194766 | 100.336275 | 99.9944516 | 100.01843  |
| 100.062235 | 100.218432 | 99.8790816 | 100.040586 |
| 100.029491 | 100.14065  | 99.6041666 | 100.00489  |
| 100.265687 | 100.222329 | 100.267866 | 100.070497 |
| 100.005592 | 100.113839 | 100.332842 | 100.081329 |
| 100.031198 | 100.272678 | 100.149922 | 100.306461 |
| 100.518643 | 100.302294 | 100.262933 | 100.310646 |
| 100.316278 | 100.150782 | 100.419476 | 99.8927547 |
| 100.015369 | 100.236982 | 100.559722 | 99.8346562 |
| 99.8114516 | 100.481552 | 100.244062 | 99.8581664 |
| 100.140916 | 100.699156 | 100.201388 | 99.9907345 |
| 100.35135  | 100.232617 | 100.646142 | 100.066804 |
| 99.9993841 | 99.8965471 | 100.499678 | 100.130073 |
| 100.062856 | 99.9617036 | 100.281375 | 100.023107 |
| 100.063477 | 100.106513 | 100.410899 | 99.771634  |
| 100.013196 | 100.145482 | 100.193668 | 99.9225426 |
| 100.000315 | 100.015013 | 99.6957334 | 99.8938625 |
| 100.002333 | 99.9984905 | 99.7257554 | 99.9317743 |
| 100.032284 | 100.050553 | 99.7032389 | 100.15346  |
| 100.111119 | 100.333314 | 99.6661404 | 100.238884 |
| 100.208112 | 100.650679 | 100.292526 | 100.172293 |

|            |            |            |            |
|------------|------------|------------|------------|
| 100.231235 | 100.413902 | 100.159572 | 100.101023 |
| 99.7423929 | 99.8965471 | 100.232054 | 99.9112183 |
| 100.031042 | 100.198948 | 100.228623 | 100.041571 |
| 100.162952 | 100.177593 | 100.407253 | 100.011168 |
| 99.9231869 | 99.8527457 | 100.336702 | 99.9458066 |
| 99.8784927 | 99.7356823 | 99.9955238 | 99.9684552 |
| 100.15302  | 100.136441 | 99.3140261 | 100.155552 |
| 99.9712951 | 99.7985006 | 99.9086747 | 100.086129 |
| 99.8916837 | 99.9168111 | 99.7718605 | 100.164046 |
| 100.233252 | 99.9755766 | 100.045274 | 100.495404 |
| 100.147278 | 99.7894598 | 100.191739 | 100.192479 |
| 100.00016  | 100.111501 | 100.522837 | 100.080837 |
| 99.8653018 | 100.175722 | 100.36608  | 99.9775639 |
| 99.8518004 | 100.254752 | 100.036911 | 99.9001401 |
| 99.9584145 | 100.311647 | 99.4064508 | 100.079852 |
| 100.118413 | 100.130986 | 99.4315405 | 100.138689 |
| 99.9550004 | 100.1433   | 99.9850161 | 100.083298 |
| 100.081479 | 100.140962 | 99.9425565 | 100.188294 |
| 99.8524212 | 99.9394132 | 100.050635 | 99.9118337 |
| 99.8780272 | 99.8249997 | 100.36608  | 100.08736  |
| 100.001712 | 99.560321  | 100.044846 | 100.102747 |
| 99.8603358 | 99.5914964 | 99.5464816 | 100.111363 |
| 100.060218 | 99.9010675 | 99.5769324 | 99.9991047 |
| 99.911703  | 99.9997375 | 100.065003 | 100.13118  |
| 100.063322 | 99.8703598 | 99.7915892 | 100.163553 |
| 100.077909 | 99.7179124 | 99.953922  | 99.9806411 |
| 100.149761 | 100.040733 | 100.310968 | 100.010675 |
| 99.8603358 | 99.6702141 | 100.18359  | 100.195434 |
| 99.9140308 | 99.7635843 | 99.3854354 | 100.051049 |
| 100.032129 | 99.7244592 | 99.2741399 | 99.9333745 |
| 100.026387 | 100.14065  | 100.188522 | 99.9251275 |
| 100.299673 | 100.20113  | 99.7941625 | 100.113948 |
| 99.939016  | 99.7913303 | 100.144132 | 99.839949  |
| 99.9563971 | 99.995217  | 100.188522 | 100.023353 |
| 100.046096 | 99.9565596 | 99.9882328 | 99.9651318 |
| 100.027473 | 100.079235 | 99.4825778 | 99.8628438 |
| 100.120586 | 100.338458 | 99.6208931 | 99.9656241 |
| 100.226424 | 100.410005 | 99.9219701 | 100.01843  |
| 100.013196 | 100.282498 | 100.031765 | 99.8852462 |
| 100.117017 | 100.199104 | 100.185091 | 100.016953 |
| 100.224562 | 99.8426138 | 100.114539 | 100.168846 |
| 99.9079785 | 99.7316295 | 99.7487007 | 99.9728865 |
| 100.002333 | 99.919461  | 99.5953744 | 100.260179 |
| 100.290051 | 100.087808 | 100.224763 | 100.28332  |
| 99.9506551 | 100.14595  | 100.408325 | 99.8964474 |
| 99.836592  | 100.16372  | 100.186163 | 99.7862817 |

99.7922082 100.042292 99.9131779 99.8765068  
100.021421 99.8781536 99.7414097 99.9161419  
99.7473589 99.369528 99.5535582 99.8052376  
100.055252 99.709495 99.7090289 100.022738  
99.9238076 99.8189205 100.170294 99.9001401  
99.9716055 99.9635741 100.129765 99.86986  
99.9745541 99.9172787 99.9140357 99.9214348  
99.9438269 99.884077 99.3451203 99.919096  
100.000781 99.7668577 99.5153875 100.024215  
100.059287 99.7294473 100.076154 100.115056  
99.8431099 99.8474459 100.185091 99.9309127  
99.9974782 100.014796 100.107155 100.191915  
100.119971 99.7766568 99.8125047 100.1998  
100.255693 100.023083 99.4702471 100.229863  
100.552352 100.578325 100.08378 100.202388  
100.252425 100.562063 100.129672 99.8668919  
100.257561 100.540642 100.073058 99.8963387  
100.318418 100.166155 99.9632611 99.9584356  
100.155146 100.253561 100.065981 99.9335475  
100.098025 100.281393 99.2641633 100.046529  
100.017089 100.170533 99.3188474 100.089159  
99.9146751 100.032621 99.2249195 100.119099  
99.9929645 100.268885 99.8283738 100.12834  
100.167131 100.595525 99.9518954 100.435744  
100.098959 100.312353 99.9847058 100.12181  
99.8530398 100.310946 99.858182 100.037782  
99.751715 100.002913 100.198295 100.165056  
99.8080584 100.059047 100.08764 100.08534  
99.9238582 99.8965865 100.246546 100.051951  
99.8841687 99.8750085 100.098577 100.095443  
99.8922623 99.6252983 99.8918502 99.9808595  
99.8049455 99.7921366 99.5573126 99.8126803  
99.8763865 99.6184184 99.5298634 99.8548175  
100.064094 99.9789893 99.9491076 100.138443  
100.132111 100.061392 99.9907103 100.234545  
100.052577 100.06061 100.290722 99.9733438  
99.8597325 99.9000264 100.254051 99.8670151  
99.9802016 99.8018311 100.112731 100.251794  
99.7409755 99.4778489 100.254266 100.188342  
99.8838575 99.7455407 99.7979223 100.111707  
99.8757639 99.6362437 99.6437348 100.122795  
100.031098 100.108926 99.6859809 99.9820916  
100.306745 100.307975 99.6576739 99.9658281  
100.23079 100.099075 99.9553265 99.9717421  
100.36231 100.249027 100.045394 100.07536  
100.401221 100.702476 100.170846 100.098154



|            |            |            |            |
|------------|------------|------------|------------|
| 100.225654 | 100.863529 | 100.194435 | 99.9691547 |
| 100.092266 | 100.855555 | 100.023521 | 100.081521 |
| 100.027518 | 100.331586 | 100.093002 | 100.101234 |
| 100.274993 | 100.631801 | 99.971839  | 100.070309 |
| 100.241062 | 100.306255 | 100.171704 | 99.9981086 |
| 100.155458 | 100.268259 | 100.038746 | 100.012154 |
| 99.9973226 | 100.066708 | 100.331252 | 99.9526448 |
| 99.8279809 | 99.7727477 | 100.199582 | 100.003899 |
| 99.6107007 | 99.7813476 | 100.228961 | 99.9480861 |
| 99.6376273 | 99.6251419 | 100.033814 | 99.8755165 |
| 99.8061907 | 99.6076294 | 100.151331 | 100.140291 |
| 99.8718728 | 99.4326603 | 100.145756 | 100.150394 |
| 99.8337398 | 99.3591701 | 100.422821 | 100.08497  |
| 99.8001205 | 99.6720506 | 100.02588  | 100.072034 |
| 99.9447146 | 99.5860514 | 100.320316 | 100.14103  |
| 100.113745 | 99.768995  | 100.082065 | 100.024229 |
| 99.9764662 | 99.6804941 | 99.5884074 | 100.103944 |
| 99.83981   | 99.2126589 | 99.6525271 | 99.8986796 |
| 100.181606 | 99.7843185 | 99.667324  | 100.038151 |
| 100.258183 | 99.7272464 | 99.7488139 | 99.9880056 |
| 100.106897 | 99.7810349 | 100.19851  | 99.9523984 |
| 100.326823 | 100.040752 | 100.148758 | 100.068584 |
| 100.149699 | 99.6027822 | 100.064051 | 99.8636885 |
| 100.091955 | 99.734439  | 100.093002 | 99.8755165 |
| 99.8757639 | 99.6667343 | 100.136106 | 99.8434823 |
| 99.9907855 | 100.06749  | 100.074988 | 99.8782271 |
| 100.108142 | 100.063737 | 100.530903 | 99.9982318 |
| 100.0546   | 99.757737  | 100.249334 | 100.000573 |
| 99.9573218 | 99.7281845 | 100.104153 | 100.024352 |
| 99.7847117 | 99.4881688 | 100.276568 | 99.9265247 |
| 100.018023 | 99.6418727 | 100.230248 | 99.924923  |
| 99.9901629 | 99.4558018 | 100.327392 | 99.850382  |
| 99.9291501 | 99.9186335 | 100.007223 | 99.9250462 |
| 99.9844041 | 99.6460945 | 99.6664662 | 100.014249 |
| 99.8209769 | 99.436413  | 99.4837572 | 99.9494414 |
| 99.7506254 | 99.4457947 | 99.7955634 | 99.8920264 |
| 99.8359188 | 99.6095057 | 99.9360263 | 99.9257854 |
| 99.7865794 | 99.7802531 | 99.7503151 | 99.9345332 |
| 99.6731143 | 99.7069193 | 100.051399 | 99.9000349 |
| 100.019891 | 100.18742  | 99.8931369 | 99.9543697 |
| 100.136158 | 99.9151935 | 99.9615455 | 100.028048 |
| 100.224875 | 99.8817321 | 99.7243669 | 100.182428 |
| 100.067051 | 99.4251549 | 99.78913   | 100.013756 |
| 99.9979452 | 99.881263  | 99.6559583 | 99.8968315 |
| 99.9380219 | 100.246525 | 99.537369  | 99.9287424 |
| 99.910784  | 100.646968 | 99.7814099 | 99.7139905 |

|            |            |            |            |
|------------|------------|------------|------------|
| 100.08106  | 100.863998 | 99.7395927 | 99.7749786 |
| 99.9233913 | 100.406952 | 99.6029898 | 99.8522301 |
| 99.9339751 | 100.133788 | 100.147471 | 99.9021294 |
| 99.6796514 | 99.7208355 | 100.501952 | 99.9239373 |
| 99.7447109 | 99.6987885 | 100.391512 | 99.8749004 |
| 99.9521856 | 100.033872 | 100.291794 | 99.8132963 |
| 100.175847 | 100.383967 | 100.374142 | 99.9710028 |
| 99.9618355 | 100.277328 | 100.642201 | 100.021025 |
| 100.027518 | 100.554245 | 100.195722 | 100.174789 |
| 99.844168  | 100.30563  | 100.222742 | 99.8434823 |
| 100.221918 | 100.31376  | 100.188216 | 100.062423 |
| 100.072343 | 100.271855 | 100.387652 | 100.030636 |
| 100.076235 | 100.384592 | 100.192505 | 99.8692329 |
| 100.178805 | 100.640401 | 100.105868 | 100.021641 |
| 100.009619 | 100.41305  | 99.6750441 | 100.063409 |
| 100.203396 | 100.309539 | 99.5682494 | 100.027555 |
| 100.036701 | 100.255125 | 99.8182948 | 99.8974475 |
| 100.086351 | 100.338622 | 100.092573 | 99.9053329 |
| 100.064561 | 100.2115   | 100.422821 | 99.9522752 |
| 99.9332225 | 100.574545 | 100.222145 | 100.132397 |
| 99.8672794 | 100.583295 | 99.9963161 | 99.9405554 |
| 99.7723972 | 100.109355 | 100.050574 | 100.053728 |
| 99.6123626 | 100.442571 | 100.549365 | 99.9735258 |
| 99.5801027 | 99.7984507 | 100.249378 | 100.234375 |
| 100.073332 | 100.403781 | 100.335478 | 100.362269 |
| 99.6607525 | 100.479028 | 100.427443 | 100.110315 |
| 99.8666468 | 100.43703  | 99.6699333 | 99.7264781 |
| 99.5940187 | 100.276911 | 100.570105 | 99.877375  |
| 99.598921  | 100.369658 | 100.25273  | 99.8562126 |
| 99.6196369 | 100.300681 | 100.196587 | 99.9542036 |
| 99.5789957 | 99.9773812 | 100.235552 | 100.083478 |
| 100.239217 | 100.053357 | 99.7947884 | 100.238976 |
| 100.00217  | 99.977527  | 100.208737 | 100.363496 |
| 99.7735041 | 100.366158 | 100.067542 | 100.021371 |
| 99.9115577 | 99.9979429 | 99.8702042 | 100.129177 |
| 99.6425668 | 100.538088 | 100.103784 | 99.992848  |
| 99.6525294 | 100.242933 | 100.431423 | 100.001436 |
| 99.6628083 | 100.334367 | 100.275145 | 100.326232 |
| 99.6371901 | 100.305931 | 100.105669 | 99.8792152 |
| 99.7205283 | 100.021713 | 99.8710421 | 100.014317 |
| 99.6468365 | 99.8720937 | 100.147986 | 100.078111 |
| 99.6934869 | 100.201664 | 100.339039 | 100.186223 |
| 99.9365433 | 100.809182 | 99.998411  | 99.732152  |
| 99.8347031 | 100.467508 | 100.466617 | 99.9287475 |
| 99.705189  | 100.19656  | 100.234504 | 100.243116 |
| 99.5549589 | 100.367324 | 100.046803 | 100.046521 |

|            |            |            |            |
|------------|------------|------------|------------|
| 99.8674375 | 100.667292 | 100.421787 | 99.7928789 |
| 99.9259482 | 101.051256 | 100.598386 | 99.9281341 |
| 100.125833 | 100.708707 | 100.501811 | 100.109394 |
| 100.352444 | 101.085963 | 100.141701 | 100.00849  |
| 100.033007 | 100.84943  | 100.306359 | 99.8920967 |
| 100.279068 | 100.727081 | 100.394553 | 100.004196 |
| 100.18213  | 100.569587 | 100.4      | 100.017691 |
| 99.8612702 | 100.737143 | 100.340296 | 99.6705051 |
| 99.9775008 | 100.144937 | 100.008466 | 99.8628067 |
| 100.192093 | 100.451904 | 100.184646 | 99.7950258 |
| 99.991575  | 100.536339 | 100.063981 | 99.6103917 |
| 100.174065 | 100.203122 | 100.088281 | 99.8812088 |
| 100.218185 | 100.623398 | 99.9133588 | 99.6559368 |
| 99.8717072 | 100.418656 | 100.013704 | 99.7928789 |
| 99.9787659 | 100.67925  | 100.211042 | 99.8424111 |
| 100.055937 | 100.202977 | 99.9252996 | 99.8005464 |
| 99.8944789 | 100.282015 | 99.9755768 | 99.8195619 |
| 99.8698095 | 100.211726 | 100.103993 | 99.9292075 |
| 100.198576 | 100.50484  | 100.038214 | 100.139298 |
| 99.9969517 | 100.142021 | 99.7849424 | 99.7726366 |
| 100.055779 | 100.372866 | 100.134159 | 99.7195773 |
| 100.088513 | 100.632731 | 99.9393353 | 99.4808105 |
| 99.8162011 | 99.9999845 | 99.7633651 | 99.690594  |
| 99.9718079 | 100.241621 | 99.9588177 | 99.6554768 |
| 100.277328 | 100.109355 | 99.8932479 | 99.9474562 |
| 99.9822449 | 100.139833 | 100.019988 | 99.8198686 |
| 99.9912587 | 99.9957555 | 100.052668 | 100.029345 |
| 100.14481  | 100.036441 | 99.9485528 | 99.8637268 |
| 99.9890448 | 99.9579861 | 100.119076 | 99.9089652 |
| 100.091518 | 99.8630523 | 100.013075 | 99.8364304 |
| 100.139117 | 99.8114294 | 99.7176967 | 99.9331946 |
| 100.000114 | 100.0239   | 99.9707586 | 99.927674  |
| 100.113973 | 99.5175867 | 100.21565  | 100.065383 |
| 100.430247 | 99.6820803 | 99.5959839 | 100.069677 |
| 99.872656  | 99.9117588 | 99.6686764 | 99.7861314 |
| 100.010551 | 99.9600277 | 100.097499 | 99.8453247 |
| 100.324928 | 99.7236411 | 100.130179 | 100.205239 |
| 100.356239 | 99.8400116 | 99.8176226 | 100.015391 |
| 100.276696 | 99.5280863 | 99.7401119 | 100.480809 |
| 100.045342 | 99.5194824 | 99.8934574 | 100.359049 |
| 100.207432 | 99.6540813 | 99.7453491 | 100.254617 |
| 100.117294 | 99.6335197 | 99.7543571 | 99.9402487 |
| 100.046765 | 99.8933845 | 100.353075 | 99.9285941 |
| 100.006914 | 99.4016537 | 99.7709067 | 99.9031379 |
| 100.035853 | 99.2600551 | 99.6292926 | 100.087619 |
| 100.067323 | 99.3985913 | 99.6158853 | 99.9968351 |

|            |            |            |            |
|------------|------------|------------|------------|
| 100.171535 | 99.5301279 | 99.9776717 | 99.8756882 |
| 99.9711753 | 98.9615459 | 99.9521141 | 100.249403 |
| 100.230994 | 99.3475517 | 99.5961934 | 100.152639 |
| 100.240166 | 99.5785426 | 99.9340981 | 100.362116 |
| 100.024626 | 99.7891177 | 100.004486 | 100.145585 |
| 100.381699 | 99.9009675 | 99.4189663 | 100.020298 |
| 99.8574749 | 99.3145946 | 99.7499579 | 100.141751 |
| 100.200316 | 99.2275355 | 99.6931865 | 100.318258 |
| 99.9055485 | 99.395529  | 99.7516338 | 100.10234  |
| 100.122196 | 99.4594015 | 99.6605064 | 99.912799  |
| 100.036644 | 99.3068658 | 100.06021  | 99.9851805 |
| 100.305477 | 99.5107328 | 99.9248806 | 100.170581 |
| 100.264836 | 99.7194121 | 99.6646961 | 100.032106 |
| 100.123936 | 99.4869629 | 99.8012825 | 99.9442359 |
| 99.9414456 | 99.8308244 | 100.169144 | 100.006343 |
| 100.400517 | 99.7057043 | 99.5945175 | 100.161227 |
| 100.053248 | 99.5762094 | 99.5697979 | 100.266732 |
| 99.9181995 | 99.3891125 | 99.9035128 | 99.9804266 |
| 100.174223 | 99.6521856 | 99.890734  | 100.171655 |
| 100.070327 | 99.5396067 | 99.7512148 | 99.9821135 |
| 100.094048 | 99.6464983 | 100.134369 | 100.025512 |
| 100.01071  | 99.4322775 | 99.7878752 | 100.058789 |
| 100.035221 | 99.7544108 | 99.8297729 | 100.201711 |
| 99.7216352 | 99.6275407 | 100.041147 | 100.258911 |
| 99.9207296 | 99.5737303 | 100.168306 | 100.387266 |
| 100.008021 | 99.7920343 | 99.8708326 | 100.118442 |
| 99.7755599 | 99.4513809 | 99.809662  | 100.10142  |
| 100.253152 | 99.7995174 | 100.028731 | 100.037064 |
| 100.393352 | 99.9673203 | 99.9013724 | 100.070605 |
| 100.264095 | 100.037226 | 100.058106 | 99.8891142 |
| 100.393352 | 100.24665  | 100.050972 | 99.9218898 |
| 100.333085 | 99.8078709 | 99.7731743 | 100.036605 |
| 100.383836 | 99.5172567 | 99.682953  | 100.384271 |
| 100.236816 | 99.9904756 | 100.136157 | 100.332045 |
| 100.285664 | 100.16121  | 99.8806005 | 100.334189 |
| 100.282175 | 100.270098 | 99.5568531 | 100.287017 |
| 100.268853 | 100.246064 | 100.067967 | 99.9197456 |
| 100.299462 | 100.504876 | 100.023486 | 100.097714 |
| 100.30422  | 100.45197  | 99.8432531 | 100.02573  |
| 100.234913 | 100.312745 | 100.059574 | 100.124057 |
| 100.208428 | 100.218365 | 100.301074 | 100.401884 |
| 100.430464 | 99.9280442 | 99.8757747 | 100.292377 |
| 100.163386 | 99.8383539 | 99.8201732 | 100.298963 |
| 100.103753 | 100.14758  | 100.337792 | 100.123598 |
| 100.045548 | 100.522609 | 100.314082 | 100.049317 |
| 100.369087 | 100.443617 | 100.075101 | 100.048857 |

|            |            |            |            |
|------------|------------|------------|------------|
| 100.248394 | 100.218219 | 100.103636 | 100.066317 |
| 100.362108 | 100.11402  | 100.049083 | 100.200789 |
| 100.339587 | 100.007476 | 99.9978881 | 100.240763 |
| 100.211124 | 100.643075 | 100.232673 | 100.128193 |
| 99.8135203 | 99.9890101 | 99.6185392 | 100.144887 |
| 99.5997311 | 99.531912  | 100.020548 | 100.054218 |
| 99.4268601 | 100.121054 | 100.183366 | 100.001991 |
| 99.7086875 | 99.4546787 | 99.9559248 | 100.29881  |
| 99.6224106 | 99.9491478 | 99.9714512 | 100.064632 |
| 99.4725361 | 99.7325427 | 100.038383 | 100.126967 |
| 99.4022775 | 99.2990396 | 99.7966738 | 100.06984  |
| 99.7177275 | 99.6822751 | 100.056847 | 100.111039 |
| 99.6971099 | 100.109477 | 100.348702 | 100.230655 |
| 100.127226 | 100.468238 | 100.071954 | 99.8901863 |
| 99.7551565 | 100.328866 | 99.7213495 | 100.04656  |
| 100.106925 | 99.8301469 | 99.8176554 | 100.340009 |
| 100.075047 | 99.8827593 | 100.263726 | 100.253475 |
| 99.9128022 | 99.8681041 | 100.056637 | 100.226979 |
| 100.26013  | 99.6072401 | 99.9624291 | 100.417813 |
| 99.9188289 | 99.8918456 | 99.8510163 | 100.183329 |
| 100.010657 | 99.7857414 | 99.9861384 | 100.145499 |
| 100.01478  | 99.7385514 | 100.329189 | 100.094804 |
| 100.29978  | 100.004398 | 100.124408 | 99.9421066 |
| 100.105974 | 99.6774389 | 100.056847 | 100.016694 |
| 100.169571 | 99.9963378 | 99.9009527 | 99.838266  |
| 99.795123  | 99.8377676 | 99.9443848 | 100.003063 |
| 100.194947 | 99.7338617 | 99.8715784 | 100.154842 |
| 100.053795 | 99.8241382 | 0          | 99.9715128 |
| 99.983378  | 100.004984 | 100.058735 | 100.065704 |
| 99.8054318 | 99.5036273 | 100.000196 | 100.195582 |
| 99.8028943 | 99.4099801 | 100.123149 | 100.093273 |
| 100.405405 | 99.7565774 | 99.6273515 | 100.302485 |
| 99.9362746 | 99.6749475 | 99.878922  | 100.224988 |
| 100.056333 | 99.9021043 | 100.241905 | 100.137841 |
| 100.174805 | 99.9878377 | 100.388987 | 100.187158 |
| 100.285506 | 99.7504222 | 99.8894128 | 100.072903 |
| 99.9541961 | 99.9101647 | 100.014883 | 99.4392916 |
| 99.9070927 | 99.9975102 | 99.8361193 | 99.599494  |
| 99.9549891 | 99.829121  | 99.8323426 | 99.7529575 |
| 100.029371 | 100.060821 | 100.384161 | 99.6048545 |
| 100.139755 | 99.7439739 | 99.9225639 | 99.7384075 |
| 99.8744216 | 99.7200858 | 100.019919 | 99.5766735 |
| 100.23872  | 100.09233  | 99.8256285 | 99.6633605 |
| 99.8493633 | 100.26409  | 99.9290682 | 99.5063744 |
| 99.5675359 | 99.9642427 | 99.999147  | 99.9231151 |
| 99.9348472 | 99.7219909 | 100.104055 | 99.9975495 |

|            |            |            |            |
|------------|------------|------------|------------|
| 99.993211  | 100.07958  | 100.320167 | 99.8894205 |
| 99.9172429 | 99.9258459 | 99.836539  | 99.9107094 |
| 99.9553063 | 99.6025504 | 99.5467818 | 99.9404219 |
| 99.8146305 | 99.6255592 | 99.8117806 | 100.001838 |
| 99.936116  | 99.5941969 | 99.9061982 | 99.973657  |
| 99.7825938 | 99.6891631 | 100.16763  | 99.9728912 |
| 99.6428696 | 99.5244378 | 100.026423 | 99.6368643 |
| 100.481532 | 99.9262855 | 99.708131  | 99.8881953 |
| 100.058553 | 99.9405011 | 100.037544 | 99.8955468 |
| 100.062518 | 100.213969 | 99.7431704 | 99.8413292 |
| 100.109304 | 100.102735 | 100.025584 | 99.9989279 |
| 100.010974 | 100.162236 | 100.203719 | 99.6737752 |
| 100.17306  | 100.724998 | 100.073632 | 99.9577286 |
| 99.9261244 | 100.37972  | 99.7729644 | 99.77685   |
| 99.7814836 | 100.284167 | 100.120631 | 99.8117698 |
| 99.2233798 | 100.08383  | 100.19029  | 99.7861926 |
| 100.268853 | 100.410056 | 99.9273897 | 99.8495996 |
| 100.610313 | 99.9786049 | 99.6980598 | 100.265421 |
| 99.7513501 | 100.137615 | 99.9817322 | 99.7708769 |
| 99.8512664 | 100.255883 | 99.7970934 | 99.7970667 |
| 100.107718 | 99.983148  | 100.252396 | 99.8229503 |
| 99.9553063 | 100.161796 | 99.9479517 | 99.8719606 |
| 99.8266839 | 99.9613116 | 99.9573935 | 99.8906458 |
| 99.7253402 | 99.6632233 | 99.9737592 | 99.8987631 |
| 100.166241 | 99.8565264 | 99.9011626 | 100.024352 |
| 99.642711  | 100.321831 | 99.7878614 | 99.7621469 |
| 99.6669764 | 100.22965  | 100.032088 | 99.8071751 |
| 99.8517422 | 99.9639496 | 100.287226 | 100.005667 |
| 100.213978 | 100.359935 | 100.152104 | 100.125589 |
| 99.9992377 | 100.194917 | 99.9894955 | 99.9535934 |
| 100.041107 | 100.182313 | 99.9401885 | 99.88115   |
| 99.7549979 | 100.599256 | 99.9082963 | 99.5958182 |
| 99.9698972 | 100.150658 | 99.911024  | 99.9983153 |
| 100.171474 | 100.071373 | 100.363179 | 100.041046 |
| 99.5583503 | 99.7513963 | 99.7063744 | 100.129776 |
| 99.3282966 | 99.6846279 | 99.8808885 | 99.8561176 |
| 99.1881816 | 99.7050375 | 99.753874  | 99.8351258 |
| 99.6285656 | 100.094423 | 99.7388081 | 99.6566195 |
| 99.2691264 | 100.110167 | 99.5628292 | 99.3780578 |
| 99.3499135 | 99.9544714 | 99.8352721 | 99.6497244 |
| 99.3300323 | 99.5487586 | 99.2947805 | 99.4606457 |
| 99.5064384 | 99.7976094 | 100.161283 | 99.7134657 |
| 99.373266  | 100.3389   | 99.8859105 | 99.8023358 |
| 99.4908174 | 100.388174 | 99.7992812 | 99.7902311 |
| 99.1512594 | 99.7512505 | 99.7503168 | 99.8634723 |
| 99.2203702 | 99.7438156 | 99.664106  | 99.7718442 |

99.6919961 100.086113 99.7484336 99.8818592  
99.0707879 100.234957 99.8331796 99.5662172  
99.4237579 100.105939 99.7584775 99.7513121  
99.5247417 100.179705 100.519518 99.7251108  
99.6369284 100.367765 100.493153 99.9305846  
99.8198037 100.46092 100.093486 99.9186331  
99.7088793 100.894477 100.169862 99.7407397  
99.6886826 100.737323 99.8277391 99.6805225  
99.8982239 100.256679 99.8792145 99.7873198  
100.264764 100.181601 100.274487 100.06864  
99.9974721 100.059581 100.137429 100.045656  
100.290167 100.003892 99.7262531 100.050253  
99.8316377 100.034506 100.040546 100.050406  
99.838896 99.8445513 100.247285 100.108784  
99.8068652 99.9235655 100.454232 99.9883501  
99.7336519 99.9135065 100.202087 100.189074  
100.106661 99.6515353 99.9861411 100.119817  
99.8387382 99.8428019 99.8308779 100.037229  
100.038655 100.013951 100.143706 99.9422296  
100.135063 100.175186 100.23745 100.001374  
100.119284 100.259157 99.8721001 100.060825  
100.459 99.9363943 99.9252494 99.9826808  
99.9108469 100.233499 99.8528491 99.835279  
100.186501 100.30639 100.102693 99.8349726  
100.162044 99.8522778 100.188485 100.21359  
99.9794843 100.028675 100.105204 100.15659  
100.370481 100.076491 100.113365 100.105107  
99.9850069 100.161774 99.9920001 99.9799228  
99.8418939 100.270528 100.392713 99.9132702  
99.9135293 100.249681 100.302736 100.156437  
99.9947897 100.171833 100.056449 100.001068  
100.33561 100.380594 100.031967 100.013326  
99.8616173 100.355665 99.8344351 100.084269  
99.6880514 100.009723 100.126548 99.863932  
99.8467853 100.294874 100.274278 99.9580117  
99.9474535 100.231312 100.040546 99.9935597  
100.161886 99.9119029 100.006857 100.149695  
100.140427 100.367765 99.8040939 100.030334  
100.190446 99.7642252 99.8068142 100.227686  
100.127647 100.065995 100.443142 99.8481499  
100.132696 100.316158 100.100182 99.944528  
99.9458757 100.04369 100.106669 100.0406  
100.486139 100.249389 99.79405 100.210985  
99.878185 100.055936 99.893862 99.9209314  
99.8103365 99.9228365 100.051427 100.204703  
100.116286 99.7369638 100.172582 100.279629

|            |            |            |            |
|------------|------------|------------|------------|
| 100.172616 | 100.123433 | 100.16484  | 100.305065 |
| 99.885601  | 99.9232739 | 99.9281789 | 100.121655 |
| 100.35202  | 100.304349 | 99.8639393 | 100.205929 |
| 100.061218 | 100.345314 | 99.8934435 | 100.065882 |
| 99.9979454 | 100.005058 | 99.8733556 | 100.022826 |
| 99.893017  | 100.128244 | 100.385389 | 99.7502396 |
| 100.218216 | 100.462669 | 100.377019 | 100.055156 |
| 100.082835 | 100.052146 | 99.8610098 | 99.9419232 |
| 100.036919 | 100.202447 | 100.118805 | 99.7539169 |
| 99.9203141 | 100.064391 | 99.7195571 | 99.8194969 |
| 99.9924229 | 100.072993 | 100.082814 | 99.9646003 |
| 100.087095 | 99.9452871 | 100.306502 | 99.9321168 |
| 100.15163  | 100.273589 | 100.002253 | 99.9894227 |
| 100.153839 | 100.252888 | 100.033222 | 99.9872775 |
| 100.057431 | 100.160899 | 100.156052 | 99.9229233 |
| 100.172616 | 100.020802 | 99.7768915 | 99.9414635 |
| 100.122597 | 99.8034407 | 99.669128  | 100.055616 |
| 100.123386 | 99.8783729 | 100.195809 | 100.041212 |
| 100.142952 | 99.8473212 | 100.156261 | 100.288976 |
| 100.275335 | 99.9256064 | 99.7662198 | 100.170381 |
| 100.389258 | 99.8572344 | 99.8476179 | 100.336935 |
| 100.170407 | 100.052583 | 99.6785442 | 99.8712868 |
| 99.8799206 | 99.9075294 | 99.8264836 | 100.290049 |
| 100.338608 | 99.3537016 | 99.9175072 | 100.300162 |
| 100.301055 | 99.7481891 | 100.093277 | 100.281315 |
| 100.2807   | 99.7955684 | 99.8658226 | 100.240557 |
| 100.117233 | 99.650369  | 99.9551721 | 100.019301 |
| 99.8915969 | 99.7658288 | 99.9620774 | 99.8438596 |
| 100.505547 | 100.009869 | 99.9737953 | 100.11951  |
| 100.296005 | 99.5340346 | 99.6105381 | 99.972568  |
| 99.7708897 | 99.9726942 | 99.88047   | 99.747788  |
| 99.9084801 | 99.7929443 | 99.9654254 | 100.030334 |
| 100.178138 | 99.3026777 | 100.146635 | 99.9089799 |
| 100.405825 | 99.6388522 | 100.02255  | 100.158123 |
| 100.21869  | 99.647016  | 99.6287428 | 100.271202 |
| 99.9824823 | 99.4099736 | 99.8189507 | 100.094381 |
| 100.638088 | 99.2621502 | 99.7132796 | 100.314411 |
| 100.090251 | 99.5802476 | 99.6308353 | 99.8674561 |
| 99.9280457 | 99.7228229 | 100.061471 | 100.031406 |
| 100.13806  | 99.498901  | 99.8302501 | 99.947286  |
| 99.9815356 | 99.5344719 | 100.576225 | 99.818884  |
| 100.393518 | 99.55182   | 100.205853 | 100.186929 |
| 100.284803 | 99.8272032 | 99.907254  | 100.015011 |
| 100.538069 | 99.6375596 | 100.258231 | 99.9968412 |
| 101.298471 | 99.8135768 | 100.06267  | 100.231838 |
| 100.544725 | 99.8402859 | 100.003561 | 99.9959215 |



|            |            |            |            |
|------------|------------|------------|------------|
| 100.606851 | 99.6673336 | 100.134145 | 100.351252 |
| 100.82524  | 99.3342729 | 99.7530832 | 100.515428 |
| 100.792434 | 99.7896408 | 100.779309 | 100.144615 |
| 100.7124   | 99.6028232 | 100.19514  | 100.121468 |
| 100.826508 | 99.3170506 | 99.8050652 | 100.218961 |
| 100.781024 | 99.3964481 | 99.7099045 | 100.190142 |
| 100.590685 | 98.9645784 | 100.007753 | 100.243028 |
| 100.376099 | 99.5537836 | 100.409985 | 100.020142 |
| 100.75218  | 99.9678473 | 99.8323138 | 100.39816  |
| 100.384816 | 99.8970609 | 99.8675275 | 100.304805 |
| 100.031557 | 100.102122 | 99.9362779 | 100.19796  |
| 99.915864  | 99.8078847 | 99.739878  | 100.389116 |
| 99.7597581 | 99.8560486 | 99.8790557 | 100.233984 |
| 100.381646 | 100.021995 | 99.9117541 | 100.656763 |
| 100.20985  | 99.651133  | 99.8113533 | 100.392795 |
| 99.8800468 | 99.5647299 | 99.959544  | 100.056319 |
| 99.80762   | 99.7397255 | 99.7836855 | 99.9557589 |
| 99.7142734 | 100.026958 | 99.8409076 | 100.060611 |
| 99.9825854 | 99.8732708 | 99.941518  | 100.131278 |
| 100.048514 | 99.5771358 | 100.206668 | 100.618134 |
| 100.202719 | 99.2723896 | 99.4845792 | 100.285643 |
| 100.308585 | 99.7408931 | 100.286318 | 100.225246 |
| 100.108421 | 99.4040376 | 100.560691 | 100.148447 |
| 100.106836 | 99.8881579 | 100.535329 | 100.306338 |
| 100.221103 | 99.5691084 | 99.9645745 | 100.122234 |
| 100.202719 | 99.9628849 | 99.7912313 | 100.296834 |
| 100.078151 | 99.8335721 | 99.8920512 | 100.142009 |
| 100.189089 | 99.8777953 | 99.7926985 | 100.283497 |
| 99.9586544 | 100.272302 | 99.9408892 | 99.8815656 |
| 100.185285 | 100.150578 | 100.167472 | 100.021828 |
| 99.8104727 | 100.315357 | 100.236223 | 99.9775264 |
| 100.355496 | 100.353159 | 99.8729772 | 100.354012 |
| 100.276572 | 99.9996646 | 99.7122102 | 100.13557  |
| 99.821408  | 99.9771881 | 99.747843  | 99.9526931 |
| 99.7204543 | 99.9516467 | 99.9867927 | 99.9861108 |
| 100.049307 | 99.9695987 | 100.292606 | 100.172207 |
| 99.873866  | 99.8655354 | 100.59318  | 99.9747672 |
| 100.162622 | 99.9167643 | 99.9798757 | 100.329638 |
| 99.9505718 | 100.112631 | 99.8962433 | 99.8731345 |
| 100.047247 | 100.156708 | 99.9792469 | 99.826687  |
| 99.7619768 | 100.096284 | 100.378754 | 99.7397705 |
| 100.51081  | 100.240046 | 99.8880687 | 99.8387971 |
| 99.9467682 | 100.039947 | 99.7415549 | 99.7037468 |
| 99.9088907 | 100.190715 | 99.9735875 | 99.8691489 |
| 100.147566 | 99.6775502 | 99.7472142 | 100.103226 |
| 99.742008  | 100.086068 | 100.330126 | 99.8716016 |

|            |            |            |            |
|------------|------------|------------|------------|
| 99.990668  | 100.309227 | 99.8876495 | 100.195814 |
| 99.9172903 | 100.028417 | 99.9316666 | 100.021675 |
| 99.9001742 | 100.328347 | 99.7384108 | 99.9151365 |
| 99.849935  | 99.8509403 | 100.189481 | 100.209917 |
| 99.6943045 | 100.174368 | 100.115909 | 99.963117  |
| 99.9705407 | 100.56581  | 100.028504 | 100.054939 |
| 100.321422 | 100.006086 | 99.6933458 | 100.157645 |
| 100.134412 | 100.078624 | 99.8402788 | 99.9327651 |
| 99.7893944 | 99.7861379 | 99.7013107 | 99.7465153 |
| 99.8290152 | 100.310687 | 99.9012738 | 99.5771276 |
| 99.6183911 | 100.376511 | 99.7994059 | 99.4184703 |
| 99.8906652 | 100.583178 | 100.033115 | 99.5990484 |
| 99.9987507 | 100.693079 | 100.143577 | 99.7123312 |
| 100.070227 | 100.259312 | 100.19493  | 100.12576  |
| 100.050733 | 99.9338406 | 99.8163838 | 100.146914 |
| 100.154698 | 100.151016 | 99.881571  | 99.7399238 |
| 100.049465 | 99.7133083 | 99.9060948 | 100.172514 |
| 99.9900341 | 99.6705446 | 99.5093126 | 99.9300059 |
| 99.9312369 | 100.028271 | 100.179    | 99.7163168 |
| 99.7256842 | 99.8983745 | 99.9467581 | 99.7618445 |
| 99.6744941 | 99.7667264 | 100.079228 | 99.7282736 |
| 99.6727508 | 100.034693 | 100.194511 | 99.8673094 |
| 99.8451805 | 99.5216743 | 99.7400877 | 99.8783465 |
| 99.7740216 | 99.2084629 | 99.6975379 | 99.9828916 |
| 99.7267936 | 99.8124092 | 99.5478799 | 99.6102387 |
| 99.8439126 | 100.199618 | 100.066862 | 99.710645  |
| 99.9126943 | 100.200785 | 99.9853254 | 99.618823  |
| 99.7806779 | 99.8881579 | 99.7606289 | 99.486532  |
| 99.9255315 | 99.9347163 | 99.9781989 | 99.6202027 |
| 99.958179  | 99.9315054 | 100.00922  | 99.8389504 |
| 100.05945  | 100.029147 | 99.7855719 | 99.9349112 |
| 99.9120604 | 100.022433 | 99.8752828 | 99.9119174 |
| 99.7485058 | 100.380451 | 100.108992 | 99.8967415 |
| 99.5795627 | 99.9704744 | 100.071683 | 99.9785995 |
| 99.6391524 | 100.158022 | 100.768619 | 100.084831 |
| 99.8700624 | 100.228808 | 100.698192 | 100.1998   |
| 99.8672097 | 100.427594 | 100.484814 | 99.9936221 |
| 99.7004854 | 100.191736 | 100.74703  | 99.9621972 |
| 99.8028655 | 100.086214 | 100.394474 | 99.9871838 |
| 99.9583375 | 100.37797  | 100.285689 | 100.371027 |
| 99.8816316 | 100.447297 | 99.8901648 | 100.002666 |
| 99.7817872 | 100.267631 | 99.9972729 | 99.9689421 |
| 99.8806807 | 100.005795 | 99.8685755 | 100.057698 |
| 99.8806807 | 100.506407 | 100.172293 | 99.9543793 |
| 100.000494 | 100.313314 | 100.022845 | 99.987797  |
| 100.265795 | 100.327617 | 99.9421468 | 100.067815 |

|            |            |            |            |
|------------|------------|------------|------------|
| 100.034885 | 99.992513  | 99.9742164 | 99.961584  |
| 99.6984251 | 99.9449329 | 100.07839  | 99.9755336 |
| 99.816812  | 100.161816 | 99.7660787 | 99.6589856 |
| 99.7817872 | 100.396944 | 99.9890983 | 99.620356  |
| 100.045028 | 100.676878 | 99.9704435 | 99.3717163 |
| 100.336657 | 99.7920954 | 99.9391778 | 99.9631501 |
| 100.195625 | 99.7298825 | 100.093238 | 100.006658 |
| 100.198732 | 99.6538757 | 99.9833755 | 99.771944  |
| 99.8093417 | 99.5300129 | 100.068824 | 99.530074  |
| 100.132876 | 99.8029334 | 99.9905313 | 99.3108167 |
| 99.8618402 | 99.6213617 | 100.150485 | 99.4085665 |
| 99.5036698 | 99.4402123 | 100.050724 | 99.9391062 |
| 99.8590444 | 99.6807596 | 99.9454918 | 99.8997486 |
| 99.6706399 | 99.4594955 | 100.030099 | 99.6646052 |
| 99.6939381 | 99.6599281 | 100.081242 | 100.321805 |
| 100.036111 | 99.7504325 | 99.8248952 | 100.63781  |
| 99.8848277 | 99.4704742 | 99.8286836 | 100.395367 |
| 100.186927 | 100.095419 | 99.8272103 | 100.519737 |
| 100.434043 | 100.099501 | 99.941072  | 100.055318 |
| 100.229951 | 100.274035 | 99.974536  | 99.6312586 |
| 99.9929312 | 100.60959  | 100.106498 | 99.9770326 |
| 99.610686  | 100.06023  | 100.182476 | 99.6948032 |
| 99.5676621 | 100.046859 | 99.980429  | 100.10956  |
| 99.962333  | 99.9894315 | 100.047357 | 99.994493  |
| 99.966682  | 99.9177881 | 100.002317 | 99.3932529 |
| 100.224981 | 100.229416 | 99.8888766 | 99.2726041 |
| 99.776103  | 99.7446616 | 100.221622 | 99.4834174 |
| 99.6673782 | 99.8453002 | 100.207731 | 99.7821054 |
| 99.8536082 | 99.998862  | 100.147538 | 99.9548492 |
| 99.3210121 | 99.5826546 | 99.8905603 | 99.9834729 |
| 99.3811214 | 99.6265696 | 100.044831 | 100.415833 |
| 99.8236312 | 99.6841377 | 100.045042 | 100.169527 |
| 100.013123 | 100.175648 | 100.051987 | 99.5617031 |
| 100.073543 | 100.63014  | 100.208994 | 99.3604788 |
| 99.8674318 | 100.234905 | 99.9459127 | 99.358332  |
| 99.9155813 | 99.945798  | 99.6798847 | 99.2408318 |
| 99.9848545 | 100.214918 | 99.9627499 | 99.8307656 |
| 99.8505018 | 99.9198994 | 100.000634 | 100.147343 |
| 99.9166686 | 99.7476174 | 99.8768801 | 100.33125  |
| 100.082862 | 99.892171  | 99.916658  | 100.647971 |
| 100.132565 | 99.6707661 | 99.8520452 | 100.546214 |
| 100.137069 | 99.7113031 | 99.9332848 | 100.169956 |
| 100.219079 | 99.6921606 | 99.8844569 | 100.043583 |
| 100.08659  | 99.2879172 | 100.009263 | 99.7053939 |
| 100.196247 | 99.3929192 | 99.9419139 | 99.9137742 |
| 100.230573 | 99.7715455 | 100.008842 | 100.136609 |

|            |            |            |            |
|------------|------------|------------|------------|
| 100.009085 | 99.4411976 | 99.8608848 | 100.091813 |
| 99.9370156 | 99.2513214 | 99.7779615 | 100.093245 |
| 99.9429178 | 99.4252924 | 99.9680115 | 100.144052 |
| 99.9300262 | 99.3526637 | 100.304545 | 99.9735977 |
| 99.5814856 | 99.6659805 | 100.471655 | 99.9575685 |
| 99.9452477 | 100.398461 | 100.164796 | 100.340267 |
| 99.8153992 | 100.381007 | 100.551    | 100.346135 |
| 99.7568432 | 100.369606 | 100.338851 | 100.435727 |
| 100.01654  | 100.106257 | 100.310017 | 100.264128 |
| 99.5619152 | 99.8644426 | 100.266662 | 100.031418 |
| 99.7936543 | 100.031235 | 100.052198 | 100.141332 |
| 99.6799592 | 99.4668146 | 100.171952 | 99.8966    |
| 99.7928777 | 99.9785935 | 100.015577 | 99.8990331 |
| 100.032693 | 100.408032 | 100.202891 | 100.028412 |
| 99.7416217 | 100.474327 | 100.253613 | 100.063619 |
| 99.8682084 | 100.453636 | 100.267714 | 100.130455 |
| 100.142816 | 100.605931 | 100.024416 | 99.7924099 |
| 99.9472668 | 100.377911 | 100.003159 | 99.6946601 |
| 99.9495966 | 100.81129  | 100.145223 | 99.7823916 |
| 100.302952 | 100.762167 | 99.9747464 | 100.18985  |
| 100.257288 | 100.040666 | 100.274028 | 99.8976019 |
| 99.8581125 | 99.4765266 | 100.416092 | 99.6895078 |
| 99.9607798 | 100.043903 | 100.253823 | 99.8639691 |
| 100.085347 | 100.287406 | 100.187948 | 100.205449 |
| 99.9965036 | 100.253485 | 100.051356 | 100.013385 |
| 100.061583 | 100.769205 | 100.179319 | 99.6225284 |
| 100.294565 | 100.902357 | 100.094712 | 99.6282532 |
| 100.053817 | 100.496847 | 99.9471755 | 99.5831709 |
| 99.9690118 | 100.287265 | 100.041464 | 99.7424616 |
| 100.168755 | 100.299511 | 99.8718289 | 99.913488  |
| 100.154465 | 100.007166 | 99.9673801 | 100.161655 |
| 99.8975641 | 100.04897  | 99.974536  | 100.141619 |
| 100.060807 | 100.404091 | 100.019786 | 100.272858 |
| 100.386826 | 100.585522 | 99.793115  | 100.095391 |
| 100.080222 | 100.213088 | 100.248562 | 99.9973554 |
| 99.9965036 | 100.68236  | 99.9793767 | 99.518052  |
| 100.268937 | 100.613532 | 99.6849359 | 99.7770962 |
| 100.547894 | 100.118362 | 100.065246 | 99.948552  |
| 100.281828 | 99.5701275 | 99.9886371 | 100.070489 |
| 99.9713416 | 99.2711676 | 99.8960324 | 100.286884 |
| 100.196091 | 99.5936333 | 99.8335243 | 100.142191 |
| 100.153378 | 99.7556404 | 99.6300045 | 100.232356 |
| 99.9850099 | 99.4371157 | 100.137646 | 100.066768 |
| 99.8495699 | 99.4938393 | 99.9191836 | 100.172246 |
| 100.132565 | 99.8058893 | 99.6891452 | 100.43172  |
| 100.261637 | 99.5756169 | 100.007369 | 100.045729 |

99.8132247 99.3737767 99.946965 99.7351626  
100.073698 99.8322101 99.6592591 99.9753151  
100.420841 100.329632 99.5565521 100.212176  
100.152446 100.475453 99.8478359 100.132173  
100.020423 100.128355 99.7722789 100.163659  
100.122624 99.8430481 99.7396568 100.364597  
100.30435 99.6210802 99.789958 100.271284  
99.7941202 99.5066478 99.7960615 100.113854  
100.0504 100.089085 99.9360208 99.8938808  
100.316931 100.48432 99.992636 99.9233632  
100.620894 100.590307 99.6596801 100.108129  
100.196557 100.18902 99.9330743 99.9249375  
100.080998 100.324143 99.5491858 100.074067  
99.9664383 99.9449935 100.128431 100.114173  
99.8008724 99.8677657 100.078476 99.9632247  
100.117729 100.659597 99.9682378 99.9975962  
100.109349 100.3075 100.162578 99.9953047  
99.8601472 99.8386471 100.181969 100.404038  
100.125177 100.279507 99.9361992 100.532215  
100.184141 100.536089 99.6347827 100.516032  
100.15559 100.172738 99.8845579 100.183345  
100.404482 100.156139 99.8556809 100.101856  
100.235347 99.9120768 100.103981 100.043281  
99.9608522 99.8582002 100.136652 100.329996  
100.135108 100.264455 99.9893159 100.217716  
99.8756641 100.188493 100.147612 99.9320041  
99.7375632 99.8690318 99.8986802 100.260967  
100.037661 100.092134 99.9003664 100.137373  
100.024782 99.8570748 99.9300865 99.8172895  
99.8922673 99.7051513 99.8171081 100.23748  
99.9881621 99.6969925 100.125269 100.444997  
99.9484387 99.5063847 100.249419 100.152411  
100.161952 99.7621226 100.039693 100.141097  
100.351414 99.8205006 99.8346029 100.030822  
100.07366 99.8981504 99.7070805 100.130499  
100.255364 100.371223 100.070677 100.413204  
100.378258 100.247856 100.115363 100.371672  
100.087626 100.037414 100.197778 100.310233  
99.7349253 100.288931 100.330359 100.031395  
99.6826332 100.460408 99.7679962 100.242492  
99.8337684 100.55747 99.8860334 100.09269  
99.3781905 100.04501 100.367878 100.259248  
99.7617697 99.778581 100.153725 100.412488  
99.8471129 99.8859122 99.9045821 100.427382  
99.7100982 99.7299092 99.658601 99.8837409  
99.7034259 100.016735 99.5007262 99.8916176

99.8272512 99.7157016 99.9020527 99.8970598  
99.9450249 99.8760653 99.896994 100.354486  
99.6196344 99.617936 100.016928 100.501567  
99.567187 99.4405512 100.132225 100.855449  
99.7952863 99.3941301 99.8769698 100.523765  
99.6391857 99.8150145 99.9009988 100.538803  
100.005696 99.9845218 99.7013894 100.309087  
100.116332 99.7584652 99.7861233 99.9208333  
100.271812 100.109718 99.7536631 100.220867  
99.9153875 99.938804 100.004492 99.8760073  
99.9430077 100.342245 100.007865 99.931288  
100.061092 100.321004 100.048967 100.185064  
99.9881621 100.230413 99.9189151 99.4747211  
100.569738 100.858223 99.5694407 98.9296479  
100.464998 100.656361 99.7865449 99.4330458  
100.249157 100.044869 100.089226 99.9496194  
100.137901 99.9188289 100.061824 99.9828451  
100.483463 100.361376 99.9853111 99.5839935  
100.464843 100.154029 99.9062683 99.3002862  
100.483774 99.849338 99.8453527 99.4575354  
100.362741 100.262345 100.192509 99.5731093  
100.318208 100.349982 99.9302973 99.7988148  
99.7983897 99.6795494 99.9197583 100.107585  
100.021679 99.4653091 99.990159 100.046146  
100.360879 99.8641083 100.211057 100.17375  
100.096005 99.4961158 100.17143 100.032254  
99.4011556 99.1033654 100.137706 100.238196  
99.5943417 99.4430832 100.11452 100.452731  
99.8246133 99.7213284 100.149298 100.399885  
99.8106481 99.5298766 100.017139 100.100424  
99.682478 99.5643407 100.091966 99.9384487  
99.9065429 99.9871945 99.8390293 100.050156  
99.9349389 100.105217 99.8750728 99.9448933  
99.7065293 99.7465083 100.223493 99.965373  
100.017489 100.079896 99.9123809 99.9195444  
100.118815 100.428476 100.140235 99.3224844  
100.367241 100.693639 100.13349 99.1921595  
100.404948 100.522022 99.948846 99.3011455  
100.089177 100.231819 99.9163858 99.3216251  
100.050851 100.442262 100.231925 99.4857486  
99.8922673 100.005341 100.167426 99.9663755  
100.400137 99.9900079 99.7203597 99.8508016  
100.350948 99.4536335 99.8955185 99.5534889  
100.277708 99.9061686 99.7772705 99.3744712  
100.64515 100.447185 99.7989809 99.3976719  
100.742286 100.551984 99.8917244 99.7098788

|            |            |            |            |
|------------|------------|------------|------------|
| 100.37531  | 100.040649 | 100.186817 | 99.977403  |
| 99.9540248 | 99.6293302 | 100.274502 | 99.9042205 |
| 99.867285  | 100.125754 | 100.056766 | 99.6858188 |
| 99.8795434 | 100.246168 | 99.9985903 | 99.7358006 |
| 99.6034967 | 99.8867562 | 100.298531 | 99.923268  |
| 99.3418808 | 100.0135   | 100.310967 | 100.266266 |
| 99.4081382 | 100.028551 | 100.213587 | 100.579475 |
| 99.9098014 | 99.950339  | 99.8805531 | 100.429817 |
| 99.5659457 | 99.4828928 | 100.011026 | 100.294479 |
| 99.6155999 | 99.7058547 | 99.9170181 | 100.394156 |
| 99.9318355 | 100.174426 | 99.9933207 | 100.294336 |
| 99.7018742 | 99.6545101 | 100.28188  | 100.18578  |
| 99.4726888 | 99.6139972 | 99.9389393 | 100.333147 |
| 99.6169965 | 100.008858 | 100.126956 | 100.404897 |
| 100.042006 | 100.200872 | 100.106721 | 99.939308  |
| 100.224175 | 100.201575 | 99.9328267 | 99.2969923 |
| 100.104229 | 100.499936 | 100.160891 | 99.5022182 |
| 100.112608 | 100.73598  | 100.02009  | 99.439204  |
| 99.9516972 | 99.8849275 | 100.48444  | 99.7217656 |
| 100.055506 | 99.7415848 | 100.007443 | 100.235189 |
| 100.144066 | 99.8827676 | 99.8752774 | 100.486764 |
| 100.290276 | 99.9816033 | 99.5462185 | 100.347842 |
| 100.034602 | 99.7383804 | 99.5963568 | 100.32865  |
| 99.6601605 | 99.6620394 | 99.9405836 | 100.532308 |
| 99.8919575 | 99.983431  | 99.9180424 | 100.336671 |
| 99.9324251 | 99.5914626 | 100.151459 | 99.9326493 |
| 99.8206354 | 99.5352261 | 100.061927 | 99.5400854 |
| 100.274771 | 99.8775657 | 99.3958036 | 99.3934289 |
| 100.273221 | 99.6891735 | 100.0377   | 99.3993009 |
| 100.072589 | 99.511185  | 99.8470483 | 99.7583515 |
| 100.13988  | 99.9720431 | 99.9079305 | 99.8398432 |
| 99.81955   | 99.818658  | 99.9690234 | 99.9544186 |
| 99.462319  | 99.4858785 | 100.041492 | 100.1618   |
| 99.7179935 | 100.083954 | 99.8685361 | 100.054672 |
| 100.213217 | 100.274033 | 99.7758434 | 99.4796469 |
| 100.469667 | 100.316773 | 99.6787268 | 98.9758016 |
| 100.668594 | 100.775241 | 99.564757  | 99.2891653 |
| 100.39757  | 100.467768 | 99.7033746 | 99.1997965 |
| 100.182673 | 100.475781 | 99.5936181 | 99.6563794 |
| 100.330899 | 100.38735  | 99.6374365 | 99.7421677 |
| 99.9612641 | 99.7750747 | 99.9985165 | 99.7573489 |
| 99.9697917 | 99.9017474 | 100.296608 | 99.9521271 |
| 99.9007953 | 100.330973 | 100.168102 | 100.53059  |
| 99.9294792 | 100.499963 | 99.8946586 | 100.391237 |
| 99.93196   | 99.9577028 | 100.260584 | 100.331515 |
| 100.004833 | 99.7475188 | 100.157358 | 100.295567 |

|            |            |            |            |
|------------|------------|------------|------------|
| 99.9131991 | 100.049228 | 100.198016 | 100.123274 |
| 100.119568 | 99.93802   | 100.103849 | 100.203047 |
| 99.8756775 | 99.8613978 | 100.244995 | 100.109525 |
| 99.9908783 | 100.191506 | 100.292605 | 100.181421 |
| 100.191511 | 100.667829 | 100.173579 | 100.099356 |
| 100.055223 | 100.455536 | 100.243731 | 100.119407 |
| 100.202519 | 100.346297 | 100.21508  | 100.155355 |
| 100.363304 | 100.286264 | 99.9622821 | 100.294851 |
| 99.7755164 | 99.9124324 | 100.326522 | 100.116972 |
| 99.7945873 | 99.8630848 | 100.07878  | 100.035337 |
| 99.9685513 | 99.970356  | 100.022322 | 100.158363 |
| 99.9347508 | 99.9215708 | 100.049708 | 100.079449 |
| 99.8962989 | 99.602991  | 100.061295 | 100.231118 |
| 100.129801 | 99.9238203 | 99.8167125 | 99.9842082 |
| 100.080031 | 100.081564 | 99.7362384 | 99.7218306 |
| 99.9344407 | 99.5331172 | 99.9865086 | 99.6701284 |
| 99.8104022 | 99.1734848 | 100.013895 | 100.048943 |
| 99.9887076 | 99.7279767 | 99.9696554 | 100.321346 |
| 100.407803 | 99.8564771 | 100.070353 | 100.35443  |
| 99.8997099 | 99.5790905 | 100.335791 | 100.234699 |
| 99.9299443 | 100.035169 | 100.20223  | 99.8613261 |
| 100.135228 | 99.6223926 | 99.8668508 | 99.7288483 |
| 100.406717 | 99.3815598 | 99.7168572 | 99.7398762 |
| 99.8545909 | 99.5980704 | 100.105956 | 99.842994  |
| 99.9656054 | 100.155655 | 100.039386 | 99.8441398 |
| 100.25353  | 100.31846  | 100.041492 | 100.054958 |
| 100.054758 | 100.20683  | 100.136502 | 100.066702 |
| 99.6711689 | 99.6150819 | 100.052025 | 99.835117  |
| 99.6086845 | 99.5165274 | 99.7244412 | 99.5471031 |
| 99.9069972 | 100.267566 | 100.04718  | 99.6732792 |
| 99.8890116 | 100.25182  | 99.8580028 | 99.6908952 |
| 99.8280777 | 100.187148 | 100.080255 | 99.8911157 |
| 99.9099431 | 99.8837518 | 100.158622 | 100.026315 |
| 100.017392 | 99.8874071 | 99.87612   | 99.9090181 |
| 100.265934 | 100.081564 | 99.8160805 | 99.6218635 |
| 100.139259 | 100.103918 | 99.9664954 | 99.7917216 |
| 100.010879 | 100.292872 | 100.026324 | 99.6629675 |
| 99.7321029 | 99.8931714 | 100.066772 | 99.5682996 |
| 99.6693084 | 99.9162283 | 100.170419 | 99.7199687 |
| 99.7472976 | 100.077908 | 100.032855 | 100.160798 |
| 99.973823  | 99.8954208 | 99.9584901 | 100.411145 |
| 99.7603216 | 99.6056623 | 100.271749 | 100.389375 |
| 99.6733396 | 99.8105037 | 100.2846   | 100.36689  |
| 99.8704058 | 100.045853 | 99.9129864 | 99.9163223 |
| 99.8873061 | 100.087609 | 99.7383451 | 99.5397989 |
| 99.9145946 | 99.7433011 | 99.87612   | 99.6331779 |



|            |            |            |            |
|------------|------------|------------|------------|
| 99.9088578 | 99.8539464 | 99.786798  | 99.9582855 |
| 100.027935 | 99.8968267 | 100.128076 | 100.421457 |
| 100.083752 | 99.7610156 | 100.206232 | 100.483041 |
| 99.7834238 | 99.5793717 | 100.097318 | 100.3709   |
| 99.7116365 | 99.9191808 | 99.9595434 | 100.541617 |
| 100.064371 | 100.41603  | 99.9018212 | 100.535459 |
| 99.6122506 | 99.8398873 | 100.027588 | 100.720355 |
| 99.8023397 | 99.8997792 | 99.978714  | 101.100602 |
| 100.070263 | 100.23298  | 99.9403729 | 100.830347 |
| 99.9659155 | 100.200785 | 100.086153 | 100.379493 |
| 99.7589262 | 99.8370755 | 100.049287 | 100.032473 |
| 99.9328903 | 99.9974901 | 99.7655209 | 100.031041 |
| 100.147167 | 100.42784  | 99.7151719 | 99.9779065 |
| 99.7372195 | 100.143283 | 100.111222 | 100.105801 |
| 99.9786295 | 100.47536  | 100.190432 | 100.123131 |
| 100.49556  | 100.350093 | 100.093526 | 100.46743  |
| 100.417416 | 100.057241 | 99.969234  | 100.373192 |
| 100.027935 | 100.077908 | 99.9778713 | 99.9956657 |
| 100.016771 | 100.215266 | 99.8912879 | 99.6760004 |
| 100.334    | 100.125288 | 99.6222686 | 99.93179   |
| 100.230738 | 99.7583444 | 100.182006 | 99.8335416 |
| 100.159106 | 100.057944 | 100.060663 | 100.073147 |
| 100.233064 | 100.300464 | 100.121756 | 100.084175 |
| 100.078015 | 100.231574 | 100.165785 | 99.3934289 |
| 99.9446739 | 99.9166501 | 100.03433  | 99.694046  |
| 99.9888626 | 100.195864 | 100.10722  | 100.134302 |
| 100.037548 | 100.380039 | 99.8588455 | 100.249737 |
| 99.8852905 | 100.00466  | 99.9648101 | 100.036483 |
| 99.6150415 | 99.5407091 | 100.21803  | 100.004832 |
| 100.216906 | 99.9795188 | 99.8381641 | 100.170531 |
| 100.425379 | 100.345038 | 99.5821812 | 100.104673 |
| 100.006105 | 100.248382 | 100.025787 | 99.8771753 |
| 100.281637 | 99.957008  | 100.054393 | 99.4545372 |
| 100.313148 | 100.203923 | 99.9933945 | 99.6095904 |
| 100.21287  | 100.108252 | 99.9742536 | 99.7510424 |
| 100.153262 | 99.9523652 | 99.8476293 | 99.5912646 |
| 100.12827  | 99.8498004 | 99.8552016 | 99.7322872 |
| 100.089929 | 100.210395 | 100.221192 | 99.8128919 |
| 100.163197 | 100.40047  | 100.420383 | 100.20031  |
| 100.410477 | 100.91048  | 100.331199 | 100.158218 |
| 99.8257291 | 100.711401 | 100.128012 | 100.483644 |
| 99.3055568 | 100.425373 | 100.154725 | 100.960973 |
| 99.7285557 | 100.605318 | 100.034621 | 100.51371  |
| 99.6225344 | 100.546509 | 99.8021961 | 100.045973 |
| 99.8038418 | 100.60363  | 100.037145 | 100.605625 |
| 99.8025999 | 100.644572 | 99.8249127 | 100.435825 |

99.6281226 99.9634799 99.7746416 99.9786829  
99.8202961 99.7359803 99.8875938 100.211907  
99.8699693 99.6383398 99.9923428 100.194583  
99.9415299 100.012159 100.204154 100.103957  
99.5900915 99.9276033 100.130956 100.163659  
99.9975675 100.139064 99.8667702 100.413347  
99.9593812 99.8071706 100.165242 99.8413828  
100.450991 100.131467 99.811451 99.6326408  
100.334725 100.228263 100.254215 99.2593963  
100.428949 100.726595 100.204996 99.6598431  
100.23662 100.354745 100.163769 100.014762  
99.8013581 99.5432317 100.104033 100.091501  
100.131064 99.8364346 99.7088054 100.013187  
100.294365 99.9209908 100.006856 99.6473873  
100.220321 99.849519 99.8055615 99.6596999  
100.597372 100.303955 99.8533085 100.137172  
100.100174 100.012019 100.210254 99.6956356  
100.03327 100.02651 99.8960074 99.9381658  
100.017747 100.132733 100.069117 100.107106  
99.4665292 99.5647577 100.23844 100.020918  
99.6247076 99.9700924 99.9555334 100.138604  
99.7311946 99.727398 100.224768 100.354361  
99.4974198 99.4837189 100.280718 100.446992  
99.3650095 100.003296 100.252112 100.250849  
99.5813987 100.178317 100.030835 100.061292  
99.4952466 100.030449 99.8554119 100.185993  
99.9615544 100.287776 99.9220894 100.340903  
99.4642008 99.9032635 100.279035 100.041535  
99.9631067 100.030731 100.191324 100.164804  
99.9843731 99.9174734 100.290604 100.383997  
99.8951164 100.091229 99.8667702 100.709137  
99.7035639 100.033545 99.7813725 100.553797  
99.8165706 100.09348 99.8211266 100.468181  
100.243605 100.334204 99.965209 100.108968  
99.9728861 100.160731 99.9845602 100.011469  
99.9404433 100.118101 100.003491 99.9471855  
100.281947 100.050568 99.6808303 100.071314  
99.7411293 99.8555688 99.9557437 100.15922  
99.8024447 100.045504 100.311848 100.152921  
100.22327 100.054789 100.141473 99.8886289  
100.301816 99.8284152 100.142946 99.2210268  
100.458132 100.319291 99.9605815 99.1492985  
100.479243 100.248663 100.206468 99.706946  
100.357388 99.86598 100.262629 99.7123865  
99.988409 99.8910233 100.198686 100.003881  
99.9050511 99.9834582 100.118126 99.9650817

100.059193 100.170438 99.7855793 99.913111  
99.9514645 99.8517701 99.8259644 99.6711535  
100.512307 100.084757 99.6414969 99.405573  
100.565085 100.294529 100.007908 99.4734356  
100.426931 100.133296 100.051869 99.3825226  
100.227151 100.250492 99.9957082 99.4034255  
99.8845608 100.201531 100.248746 99.9520532  
100.163973 99.8246165 100.032307 100.031656  
99.649389 99.5323984 99.9917117 100.145762  
99.411423 99.8631662 100.075006 100.466034  
100.047551 99.9944322 99.9366028 100.183273  
99.928025 99.4364462 100.31942 99.9778239  
100.067265 99.5155153 99.8669806 99.6240506  
100.430501 100.400611 99.9700468 99.6727284  
100.159006 100.426358 99.9921324 99.8232002  
99.8280575 100.075893 100.259684 100.111974  
99.6284331 100.151586 100.043876 100.085058  
100.231342 99.6473441 99.5855466 99.7755245  
100.268442 99.3706022 99.6730477 99.723697  
99.6380572 99.6196277 100.140632 99.9649386  
99.6458187 99.4669765 100.10214 100.137459  
99.7017011 99.5959914 99.8648772 100.136027  
100.021007 100.265968 99.8875938 100.221929  
100.017282 99.656067 100.094988 100.247699  
100.0297 99.6391839 100.199737 100.229517  
99.7878532 100.184367 100.21972 100.369824  
99.835198 99.8499411 100.237598 100.132448  
99.5713088 99.2804184 100.027259 99.8617129  
100.387037 99.9232418 99.5131899 99.626914  
100.612429 99.7243028 99.60006 99.4127315  
100.249349 99.9140968 99.718481 99.8461074  
100.236775 99.8405147 99.9092587 99.7242696  
100.44649 100.086023 99.4414642 99.912252  
100.320444 99.7926793 99.7550801 100.181269  
100.132617 99.4595198 99.6987091 100.063726  
100.108711 99.659725 99.8211266 99.956062  
100.084496 99.5931775 99.7744313 99.628632  
99.7604204 99.7164764 99.8721793  
99.5053319 99.5342748 99.9578124  
99.8442724 99.7549143 99.9382852  
99.9491338 99.849647 99.6607838  
99.4274295 99.4375748 99.9533337  
99.4514138 99.3774967 100.046133  
99.2028327 99.524287 100.073184  
99.8853617 99.7674747 99.6507515  
99.4605241 99.5831545 99.6000524

99.2610271 99.4334889 99.936852  
99.544562 99.718141 99.7974743  
99.532105 99.5504671 99.9556626  
99.4999401 99.4902377 99.5901992  
99.6966483 99.9513409 99.6407192  
99.3517582 99.5957149 100.032338  
99.7851484 99.961026 100.079813  
99.7524256 99.6538257 99.8042819  
99.6654129 99.6261322 99.9630077  
99.5681744 99.4109407 100.070139  
99.6964623 99.5488025 99.7752599  
99.9898513 100.084814 99.5418291  
101.192597 101.364462 99.9146375  
99.8844321 100.053337 100.086441  
98.928594 99.4599717 100.123704  
98.8966149 99.1249266 100.17709  
98.8464153 99.1662397 100.213099  
98.5199318 98.9304672 100.397622  
99.0301088 99.4297056 100.47591  
99.3266584 99.4056441 100.233701  
99.965867 99.8342113 100.086441  
100.439417 100.098131 100.052045  
100.276919 100.155788 99.8960061  
100.300903 100.258087 100.098802  
100.472511 100.071648 100.012811  
100.48125 100.211326 100.021589  
100.325259 100.051975 100.201634  
100.161646 99.8811237 100.244629  
99.8215896 99.7061859 100.44241  
99.9517368 100.058785 100.219907  
100.02369 99.9673819 100.224027  
99.9820425 99.9549728 99.975369  
100.075005 99.9752511 100.195005  
100.01179 99.8891442 100.461579  
99.860076 100.007333 100.420374  
100.374529 100.327548 100.397264  
99.7819876 100.074978 100.401564  
100.00175 100.296071 99.8908108  
100.181539 100.339957 100.184435  
100.28417 100.203457 100.224386  
100.586111 100.392317 100.138036  
100.39275 100.213747 100.071393  
100.151234 100.067714 100.238001  
100.301647 100.155031 100.247138  
100.100105 100.099796 100.369675  
100.389589 100.455876 100.019977

|            |            |            |
|------------|------------|------------|
| 100.298114 | 100.200884 | 99.6108013 |
| 99.9770225 | 100.060753 | 100.005287 |
| 99.7159844 | 99.8997373 | 99.9476009 |
| 99.8431568 | 99.9817583 | 100.007616 |
| 100.386242 | 100.424248 | 100.265948 |
| 100.410413 | 100.2083   | 99.9046052 |
| 100.371368 | 100.266864 | 99.7637943 |
| 100.296999 | 100.20497  | 99.913921  |
| 99.9710729 | 100.004306 | 100.008511 |
| 100.28826  | 100.337384 | 100.175299 |
| 100.388659 | 100.087689 | 99.8033862 |
| 100.447598 | 100.21632  | 99.6249541 |
| 100.456894 | 100.280333 | 99.8752248 |
| 100.320425 | 100.008846 | 100.019081 |
| 100.10122  | 100.012176 | 99.9540503 |
| 100.406694 | 100.097526 | 99.844053  |
| 100.460984 | 100.143984 | 99.7833215 |
| 100.434025 | 100.208754 | 99.9658741 |
| 100.082628 | 100.014294 | 100.034488 |
| 99.9569426 | 100.209056 | 99.8429781 |
| 99.7165422 | 100.05591  | 99.9106963 |
| 99.7085474 | 100.060299 | 99.4902343 |
| 99.9528523 | 100.200884 | 99.7322642 |
| 99.9926402 | 99.9870548 | 100.117971 |
| 100.122787 | 100.027914 | 100.201275 |
| 100.63817  | 100.238717 | 99.7915624 |
| 100.643748 | 100.413049 | 99.6804902 |
| 100.73169  | 100.303184 | 99.9413307 |
| 100.340691 | 100.063477 | 100.072468 |
| 100.358168 | 100.236447 | 100.021052 |
| 100.27506  | 100.230848 | 100.572113 |
| 100.110702 | 100.077096 | 100.39189  |
| 100.356495 | 100.244922 | 99.3838199 |
| 100.011604 | 100.122495 | 99.5608189 |
| 99.9628922 | 100.128246 | 99.6856855 |
| 100.256467 | 100.304546 | 99.607935  |
| 100.059201 | 100.165322 | 99.9003057 |
| 100.12037  | 100.166684 | 99.8877652 |
| 99.9736759 | 99.9436231 | 99.8110896 |
| 99.9561989 | 100.027006 | 100.127645 |
| 99.9974742 | 100.023223 | 99.8617887 |
| 99.7782692 | 99.9554268 | 99.9929255 |
| 99.534708  | 99.8432911 | 99.8591014 |
| 99.8569152 | 99.8941381 | 99.9012014 |
| 99.7167281 | 99.8355733 | 100.276697 |
| 100.062617 | 100.0218   | 100.206075 |

100.139752 99.9006765 100.404828  
100.178692 99.9984547 100.455638  
100.301475 100.032109 100.251499  
100.220613 100.189766 100.400698  
100.112177 100.493864 100.206255  
100.008212 100.361826 100.367842  
100.172543 100.333629 100.524043  
100.260299 100.350456 100.139286  
99.8843112 100.139892 99.9934979  
99.9554843 100.329688 99.64806  
99.803077 100.205078 99.8182654  
99.7926433 100.289667 99.903009  
99.6551414 99.9842049 100.260117  
99.7244513 100.163086 100.444147  
99.898285 100.31377 100.077882  
100.086279 100.323624 100.084705  
99.898285 100.247372 100.101761  
100.383827 100.442474 99.9263494  
99.8915776 100.004973 99.8990591  
99.9066692 100.130493 100.225106  
100.207012 100.34318 100.378435  
100.59362 100.250859 100.210923  
99.9375979 99.5256327 100.350965  
99.6873742 99.2664067 100.586344  
99.8507742 99.4172429 99.9412513  
99.6646436 99.4530191 100.07483  
99.6987396 99.4369501 100.226184  
99.4473981 99.305518 100.175373  
100.019391 99.8188157 100.285253  
99.8258077 99.6549424 99.8846957  
99.9713212 99.7177024 99.805877  
100.099694 99.804869 100.044129  
99.8919502 99.90386 100.20823  
100.211484 99.9176551 100.280944  
100.061685 99.9675295 100.146108  
99.9992688 100.058183 100.005886  
99.9444916 99.9963324 100.110559  
99.6033453 99.7164897 100.112534  
99.7309724 99.7869809 99.9735688  
99.6165738 99.7531754 100.171064  
99.9953561 100.085925 99.8062361  
99.9648001 99.9929973 100.032099  
99.6769405 99.6422085 100.303746  
99.8515194 99.9229608 100.146647  
99.6711647 100.061215 100.316134  
99.7332082 100.041811 99.9107293

99.6469435 100.090927 100.030304  
99.4671477 99.7311943 100.490289  
99.6473161 99.7424122 100.409855  
99.3637418 99.5557999 100.030483  
99.6096801 99.7078488 99.7225697  
99.5448418 99.6299294 99.9572305  
99.5211796 99.6146184 100.107507  
99.6603583 99.5100185 100.103736  
99.4494475 99.5253295 100.294589  
99.4542918 99.6247752 100.252756  
99.7801601 99.8047174 99.8288583  
99.8351236 99.8639907 100.320623  
99.5198753 99.7924383 100.381128  
99.6113569 99.9082562 100.418293  
99.8308383 99.9308437 99.9787755  
99.9633096 100.23191 99.6121517  
100.045662 100.327566 99.6936635  
99.894745 100.317864 99.7814594  
100.187449 100.40791 100.120075  
100.274273 100.442625 99.6130494  
100.702801 100.771282 99.5651118  
100.432269 100.401998 99.8631507  
100.512199 100.459604 100.059749  
100.12317 100.218266 99.7588371  
100.023304 100.206593 99.4692366  
100.332962 100.389871 99.5491326  
99.9118861 100.149291 99.9879321  
99.8438805 100.076829 99.9294016  
99.864189 99.7593908 99.6218469  
100.755902 100.164905 99.7234674  
100.400595 99.9162907 99.6866614  
99.8159329 99.7128514 99.5218423  
100.029079 99.8912777 99.8994181  
99.0986128 99.2262343 100.362097  
100.189685 100.063489 99.7514759  
100.028707 99.934482 99.4466144  
100.493009 100.37365 99.6943817  
100.129318 99.9273571 99.8170086  
100.909986 100.460362 99.697793  
100.322901 99.9857208 100.045924  
100.193411 99.8890038 99.8606372  
100.462825 100.071371 99.7511168  
100.169749 100.186886 99.7306491  
100.499343 100.48492 99.993857  
100.403576 100.357581 99.9881116  
100.859308 100.536311 100.168192

100.556729 100.248585 99.9346083  
100.885392 100.316044 99.6358512  
100.174779 99.7148221 99.8724869  
100.667774 100.127765 99.9319152  
100.408234 99.7460505 99.8486079  
100.213533 100.007247 99.7836139  
99.5048246 99.3843824 100.187303  
99.3362332 99.1100292 100.397708  
99.3583527 99.0342569 100.277092  
99.2918083 99.1706773 100.124396  
99.325824 99.1930611 100.243578  
99.1761922 99.1470835 100.155401  
99.6243443 99.6219838 100.197339  
100.003536 99.8701722 99.7412221  
100.843147 100.416156 99.4548273  
100.385701 99.7931899 99.6810039  
99.9247233 99.7773095 99.8955312  
99.5661644 99.4232517 99.698926  
100.349827 100.051209 99.3164688  
100.438119 100.040925 99.5155831  
99.9533485 100.066031 99.7320819  
99.8039025 100.116848 99.9021624  
100.035135 100.159347 100.479074  
100.210232 100.154507 100.668152  
100.929394 100.457899 100.63643  
100.822515 100.674175 100.392331  
100.803927 100.556358 100.595747  
100.624926 100.352635 100.379786  
100.368228 100.423567 100.281931  
100.501317 100.441565 100.016864  
100.634778 100.500096 100.40882  
100.339603 100.294558 100.637864  
100.378823 100.236481 99.8383598  
100.301684 100.478014 99.7684637  
100.13681 100.421903 99.7879988  
99.9821596 100.242682 100.215799  
99.9563226 100.332368 100.07063  
100.260233 100.497827 99.9478637  
100.039038 100.468032 99.8842403  
100.007067 100.207291 99.7173858  
99.8434945 100.057259 99.8770715  
100.117851 100.155566 100.106653  
100.036436 100.061342 100.028692  
99.9583672 100.246009 99.5084143  
99.5780606 99.8128514 99.6365572  
99.4847498 99.8489983 99.7172065



99.5555694 99.6301509 99.7935546  
99.9026038 99.6213788 99.3512376  
99.6784348 99.4524414 99.8915884  
99.6254595 99.4848072 100.698261  
99.6535271 99.5829633 100.611698  
99.996844 99.9081339 100.421365  
100.168967 100.040017 99.9614845  
99.9656165 99.7948536 100.015609  
99.9436828 100.021717 99.9665027  
99.975468 99.9267367 100.145007  
100.088482 99.9932833 99.9417702  
100.211905 100.215155 99.7915832  
99.6009236 99.8060455 99.9320923  
99.5602163 99.8081629 99.7869234  
99.4479459 99.6179003 99.8388975  
99.9462851 99.8712309 100.001092  
99.8304831 100.077071 99.6338689  
99.571369 99.994342 99.8224092  
99.5351228 99.6705325 99.8573572  
99.5524094 99.8866576 99.9679365  
99.9498168 100.084029 100.109879  
99.6395863 99.7512958 100.088194  
99.9089236 99.8899849 99.8614793  
99.7327112 100.026254 99.8808351  
99.800185 99.9497255 100.066866  
100.12417 100.009466 100.409357  
100.325105 100.158742 100.301108  
100.631432 100.492382 100.018477  
100.486261 100.260377 99.9019832  
100.475852 100.164489 100.072781  
100.459123 100.212433 99.9482222  
100.197592 100.307262 99.7819052  
99.7830842 100.099002 99.9561079  
99.7553883 100.085692 99.7507208  
100.111717 99.9321814 99.3372584  
100.136996 99.8081629 99.3867234  
99.9262103 99.7599166 100.138375  
99.9429393 99.7950048 100.448786  
99.8682163 99.954414 100.194472  
100.117665 100.111555 99.948939  
99.6078011 99.6830856 99.8197208  
99.5433014 99.771411 99.9270741  
99.6566871 99.7000248 100.015609  
99.9894089 99.9132762 100.149308  
100.1738 99.9656059 99.6286715  
99.9961005 99.906924 99.259835

99.7868017 99.4026827 99.9942819  
99.3843756 99.3063415 100.77676  
99.9553932 99.7266434 100.293043  
100.083463 100.110193 99.8917676  
99.7565036 99.74328 100.279243  
99.3577951 99.4373172 100.545924  
99.6011095 99.5932478 100.451653  
99.7353135 99.9067728 100.053425  
99.9375489 99.9660597 100.065253  
99.9726798 99.978764 100.369212  
99.8330854 99.9159985 100.502911  
99.6747172 99.8718358 100.200744  
100.113204 100.077676 99.9215183  
100.329194 100.333729 99.4044662  
100.083463 100.174774 99.6793909  
99.8684348 100.126321 99.8033834  
99.6634579 99.9617785 99.7279497  
100.148812 100.01299 99.6320899  
99.7556138 99.9135974 99.9196695  
99.8896586 99.9978385 100.22875  
100.387672 100.261774 99.9159067  
100.226074 100.32344 99.9064103  
100.218627 100.337833 99.7709523  
100.020538 100.205563 99.9379456  
99.9784633 100.140412 100.411153  
100.118466 100.056474 100.602335  
100.426024 100.021929 100.212624  
100.101524 99.6843586 100.474761  
99.6682984 99.4031508 100.731164  
100.025565 99.5955721 99.9845317  
99.878302 99.7151156 100.078062  
99.9025046 99.5782996 100.126619  
99.5942014 99.4301201 100.371376  
99.7608266 99.7052673 100.200799  
99.8578229 99.826326 99.9128607  
100.213786 100.215411 99.7713106  
100.128705 100.195411 99.8402939  
100.213973 100.232683 100.049215  
100.045858 100.290561 100.154929  
100.241526 100.394954 100.175893  
100.192004 100.322379 99.6758091  
100.766721 100.556163 99.5014696  
100.449854 100.195866 99.8184343  
100.014767 99.8763253 99.7266955  
99.6405586 99.6769344 99.9445751  
99.8146307 100.134352 99.751422

|            |            |            |
|------------|------------|------------|
| 100.0224   | 100.316773 | 99.6677461 |
| 100.614245 | 100.833735 | 99.6666711 |
| 100.387859 | 100.676464 | 99.6052133 |
| 100.297192 | 100.393893 | 100.16568  |
| 99.9207496 | 99.9687481 | 100.608427 |
| 99.8146307 | 99.684207  | 100.485153 |
| 99.4238528 | 99.4048174 | 100.305976 |
| 99.1777315 | 99.268759  | 100.325327 |
| 99.1133155 | 98.9999753 | 100.467056 |
| 99.6018345 | 99.346182  | 100.184852 |
| 99.8006677 | 99.4769375 | 99.8404731 |
| 99.4084004 | 99.5101188 | 100.105476 |
| 99.7718108 | 99.7473879 | 99.9830982 |
| 100.006575 | 99.9122338 | 100.073404 |
| 99.9509096 | 99.9023855 | 100.033626 |
| 99.7649224 | 99.9642027 | 99.8402939 |
| 99.9073451 | 100.236471 | 100.07627  |
| 99.7989922 | 99.9232942 | 99.9922363 |
| 99.6273403 | 100.066474 | 100.170159 |
| 99.6241753 | 100.077686 | 100.197932 |
| 99.7747896 | 100.075565 | 99.6317315 |
| 100.225143 | 100.414196 | 99.793887  |
| 100.241526 | 100.240107 | 99.8539114 |
| 100.15961  | 100.253289 | 99.6568163 |
| 99.7392305 | 100.045717 | 100.089888 |
| 99.2428922 | 99.5919357 | 100.590689 |
| 99.7749758 | 99.6286018 | 100.140416 |
| 100.107668 | 99.9908689 | 99.8533739 |
| 99.4886411 | 99.4817859 | 100.265482 |
| 99.6962244 | 99.6663285 | 100.088275 |
| 100.474802 | 100.424044 | 99.6577122 |
| 100.227563 | 100.088898 | 100.033985 |
| 99.9231698 | 99.8935977 | 100.392877 |
| 100.024076 | 100.05405  | 99.9200278 |
| 100.524324 | 100.740554 | 99.6428405 |
| 99.9388084 | 100.07011  | 100.230005 |
| 99.8051359 | 99.9948083 | 100.029864 |
| 100.139317 | 100.509649 | 99.9882944 |
| 100.583713 | 100.687222 | 100.281608 |
| 100.029289 | 99.7817813 | 100.600185 |
| 99.9313614 | 99.5955721 | 100.153317 |
| 99.9533299 | 99.6663285 | 99.9544299 |
| 99.9970806 | 99.8358713 | 99.8601826 |
| 100.244877 | 100.311773 | 99.7892284 |
| 99.9764154 | 100.066777 | 99.8157466 |
| 99.8038327 | 100.13617  | 99.8797129 |

|            |            |            |            |
|------------|------------|------------|------------|
| 100.155887 | 100.328136 | 99.7981872 |            |
| 100.409269 | 100.532224 | 99.4434161 |            |
| 100.213042 | 100.394954 | 99.5353341 |            |
| 100.059076 | 100.053595 | 99.7770443 |            |
| 100.581665 | 100.254047 | 99.5292421 |            |
| 100.574404 | 100.14526  | 99.4434161 |            |
| 100.806004 | 100.305106 | 99.3900213 |            |
| 100.521903 | 100.286016 | 99.6652377 |            |
| 100.792786 | 100.487376 | 99.7689813 |            |
| 100.427886 | 100.241017 | 99.5982253 |            |
| 100.345225 | 100.324349 | 99.659504  |            |
| 100.411503 | 100.481467 | 99.5828161 |            |
| 100.123865 | 100.516467 | 99.4143894 |            |
| 99.5001839 | 100.225865 | 99.9900862 |            |
| 99.2172003 | 99.6113294 | 100.463831 |            |
| 99.7548691 | 99.3522425 | 100.395564 |            |
| 99.9626386 | 99.4976948 | 100.011229 |            |
| 99.6569419 | 99.4916343 | 100.427996 |            |
| 99.7679012 | 99.6354199 | 100.181627 |            |
| 99.7295495 | 99.5998144 | 100.398073 |            |
| 99.6945489 | 99.4781496 | 100.443763 |            |
| 99.7788854 | 99.7286003 | 100.028251 |            |
| 99.952399  | 99.9579907 | 99.9325702 |            |
| 99.7938039 | 99.7272358 | 99.8107662 | 100.116468 |
| 99.6185952 | 99.7223884 | 99.9165284 | 100.133907 |
| 99.5861491 | 99.7662574 | 100.225662 | 100.069198 |
| 99.8000838 | 99.7185105 | 100.083891 | 100.006783 |
| 99.4632728 | 99.5999916 | 100.058073 | 100.079447 |
| 99.6363882 | 99.5023165 | 99.4801177 | 100.143392 |
| 99.6545998 | 99.6734297 | 99.7480335 | 100.11555  |
| 99.4283148 | 99.3888874 | 100.000776 | 100.025446 |
| 99.3456297 | 99.4683847 | 99.959105  | 100.082813 |
| 99.5116279 | 99.7458983 | 100.120126 | 100.056501 |
| 99.75445   | 99.9121641 | 99.3134346 | 100.00969  |
| 99.5997555 | 99.6019306 | 99.9799404 | 99.7659968 |
| 99.225056  | 99.2449196 | 100.13462  | 99.7136785 |
| 99.1771195 | 99.2534026 | 100.11537  | 99.9974515 |
| 99.132323  | 99.348654  | 99.6696744 | 100.076235 |
| 99.3921008 | 99.4177294 | 99.7620748 | 100.042121 |
| 99.3935661 | 99.578663  | 99.9058842 | 100.099181 |
| 99.2346851 | 99.5689683 | 100.273221 | 100.147675 |
| 99.151372  | 99.5728462 | 99.8372633 | 100.107136 |
| 99.3854023 | 99.2660058 | 99.8295633 | 100.029577 |
| 99.7693123 | 99.9371282 | 99.7459953 | 100.253383 |
| 99.3324419 | 99.3055121 | 99.728557  | 100.177965 |
| 99.57338   | 99.7458983 | 100.059658 | 100.134825 |

99.4339667 99.7621371 100.359507 99.9564535  
99.5380034 99.6976667 100.214338 99.967162  
99.487555 99.492137 100.223624 100.179647  
99.3994273 99.6831245 99.9507256 100.075776  
99.6282243 99.7410509 99.2597609 100.142015  
99.8538814 100.156958 100.180594 100.035696  
99.53905 99.8794442 100.315571 100.145839  
99.8287619 100.091518 100.190332 100.220951  
99.9461957 99.9705753 100.052411 100.293616  
99.9947601 100.054435 99.47355 100.230589  
99.998528 100.141931 99.8259398 99.9876609  
99.611478 99.911437 100.207544 99.8225984  
99.6621357 99.7652879 100.135753 99.9047472  
99.6926978 99.763349 99.9980581 99.8908263  
99.8494855 99.7747403 100.156362 99.9495696  
100.051279 100.170288 99.4712853 100.054665  
99.9139589 99.7938876 99.9692962 99.9015347  
100.125382 100.094184 100.18603 99.9148437  
100.186924 100.214884 100.393704 99.8190799  
100.418024 100.434714 100.123523 99.8527349  
100.152176 100.388421 100.285451 99.8486045  
100.379717 100.299956 100.01912 99.6826241  
100.035998 99.9136183 100.647352 99.7898612  
100.021973 100.005961 99.8311486 99.9767995  
100.074724 99.7587439 99.9532168 100.083578  
100.218952 100.08352 100.134168 99.8603838  
99.6012209 99.7403238 100.453039 99.5629959  
100.015693 100.228942 100.298812 99.7328007  
99.8486482 99.9218589 100.204374 99.8409557  
100.149454 100.117694 99.4262175 99.9653262  
100.25705 100.048618 100.080947 100.051452  
100.07912 100.098304 99.9720139 99.8553355  
100.151129 100.060495 100.09227 99.8039351  
100.262492 100.173197 100.255556 99.8571713  
100.106123 99.9223436 99.5752358 100.0796  
100.075561 100.139022 100.255556 100.084343  
100.091889 100.047891 100.337765 100.089544  
100.138151 100.172954 100.125788 100.132072  
100.198647 100.280082 100.389854 100.052676  
100.02281 100.330737 100.139829 99.9884258  
100.220626 100.123511 99.1927253 99.9879669  
100.360249 100.270145 99.5011796 100.1541  
100.083934 100.036985 99.9819786 100.210396  
99.8149461 100.025593 100.095894 100.169245  
99.9034925 100.072128 100.289527 100.209784  
99.8896767 100.054435 99.8970518 100.149511

|            |            |            |            |
|------------|------------|------------|------------|
| 100.047092 | 100.192101 | 100.202109 | 100.025905 |
| 99.9045391 | 99.8905932 | 100.327348 | 100.101017 |
| 100.07912  | 100.13878  | 100.027046 | 99.9238694 |
| 100.215603 | 99.9708176 | 99.3736761 | 99.7918499 |
| 100.663149 | 100.431078 | 99.6205301 | 99.6419322 |
| 100.373856 | 100.266994 | 99.9013548 | 99.6457566 |
| 100.526457 | 100.274022 | 100.087061 | 99.8235162 |
| 100.19446  | 100.088125 | 100.159985 | 99.9648673 |
| 100.32571  | 100.192344 | 100.169724 | 100.117998 |
| 100.037254 | 99.9640313 | 100.240609 | 100.115703 |
| 100.201368 | 100.242757 | 99.7745307 | 99.9146907 |
| 100.256631 | 99.9334927 | 99.3926997 | 100.102241 |
| 100.391439 | 100.168592 | 100.181727 | 99.9795531 |
| 100.103402 | 99.874112  | 100.249668 | 100.047322 |
| 100.466379 | 100.443197 | 99.9991905 | 99.865432  |
| 100.342875 | 100.289292 | 100.037011 | 99.7179619 |
| 100.901784 | 100.628367 | 99.6864333 | 99.9916383 |
| 100.65352  | 100.288807 | 100.034973 | 100.056654 |
| 100.855522 | 100.62255  | 100.09295  | 99.9924032 |
| 100.726366 | 100.400782 | 100.157494 | 99.9720572 |
| 100.478102 | 100.418475 | 100.164741 | 100.09245  |
| 100.303312 | 100.197918 | 99.5396797 | 100.095816 |
| 100.29431  | 100.156958 | 100.326668 | 100.02254  |
| 100.19467  | 100.028744 | 100.42156  | 99.9200449 |
| 100.326547 | 100.161563 | 100.190785 | 100.094286 |
| 100.203671 | 100.095396 | 100.206412 | 100.209325 |
| 100.364017 | 100.369759 | 100.11605  | 100.074705 |
| 100.530225 | 100.180225 | 99.3598613 | 100.107595 |
| 100.637192 | 100.364669 | 99.5790858 | 100.203818 |
| 100.418233 | 100.295836 | 100.044938 | 100.127941 |
| 100.607886 | 100.489974 | 100.02682  | 99.8583951 |
| 100.511213 | 100.152676 | 100.249113 | 99.6855165 |
| 100.496137 | 100.142994 | 100.084147 | 99.7968898 |
| 100.407773 | 100.109592 | 100.666061 | 99.7076994 |
| 100.373013 | 100.048839 | 99.7727963 | 99.8508936 |
| 100.647319 | 100.256756 | 99.9286984 | 99.8296287 |
| 100.561258 | 100.185836 | 100.150315 | 99.7344718 |
| 100.776933 | 100.29161  | 100.307577 | 99.680315  |
| 100.623239 | 100.218997 | 100.242315 | 99.7274345 |
| 100.647738 | 100.179785 | 100.237783 | 99.7594084 |
| 100.449023 | 100.252641 | 100.395725 | 99.9156064 |
| 100.609837 | 100.158001 | 99.9008264 | 99.8663451 |
| 100.628892 | 100.132586 | 99.6368352 | 99.8567071 |
| 100.596017 | 100.277088 | 100.346779 | 99.8106585 |
| 100.442951 | 100.064572 | 100.371932 | 99.8600728 |
| 100.464518 | 100.352848 | 100.192236 | 99.7513002 |

|            |            |            |            |
|------------|------------|------------|------------|
| 100.407144 | 99.9723521 | 100.234611 | 99.8285578 |
| 100.365894 | 100.203748 | 100.135359 | 99.6552255 |
| 100.5778   | 100.051259 | 99.5078987 | 99.5775089 |
| 100.764998 | 100.556408 | 99.6708255 | 99.9451326 |
| 100.67789  | 100.546    | 100.359015 | 100.030039 |
| 100.687732 | 100.439258 | 100.090945 | 100.030651 |
| 100.387671 | 100.067234 | 100.184985 | 100.004644 |
| 100.572565 | 100.367129 | 100.101142 | 100.108674 |
| 100.462843 | 100.102573 | 99.5631896 | 100.17767  |
| 100.300772 | 100.079578 | 99.6381948 | 100.289808 |
| 100.114831 | 99.6666485 | 100.202433 | 100.160536 |
| 100.09787  | 100.026812 | 100.007103 | 99.9963826 |
| 100.219318 | 99.9781612 | 100.26135  | 99.8176958 |
| 100.158175 | 100.027781 | 99.6189337 | 99.9354945 |
| 99.9634394 | 99.9328987 | 99.8262743 | 100.248808 |
| 99.5999322 | 99.7102167 | 100.227586 | 100.244678 |
| 99.806813  | 99.8377748 | 100.110886 | 100.369055 |
| 99.9347525 | 99.5826587 | 100.268148 | 100.570689 |
| 99.8637681 | 99.8767441 | 99.3601543 | 100.441417 |
| 99.8543454 | 99.9793715 | 100.125162 | 100.253092 |
| 99.8556017 | 100.013742 | 100.007329 | 100.069204 |
| 99.7442044 | 99.8222838 | 100.060807 | 100.110663 |
| 99.7739383 | 100.006481 | 99.8181167 | 100.046409 |
| 99.7454607 | 100.016646 | 99.5348644 | 99.9229497 |
| 99.8262867 | 99.9486317 | 99.7150128 | 100.140954 |
| 99.8840793 | 99.9389498 | 99.9953193 | 100.181189 |
| 100.053269 | 100.057068 | 99.9697133 | 100.073181 |
| 99.9728621 | 99.7206247 | 100.41272  | 99.7173375 |
| 100.344326 | 100.303713 | 99.5400762 | 99.8082107 |
| 99.9330774 | 99.8130861 | 100.359922 | 99.7777667 |
| 99.6173119 | 99.8060668 | 100.414986 | 99.9842968 |
| 99.6771984 | 99.7138474 | 99.9280186 | 100.153346 |
| 99.5195251 | 99.5957291 | 99.7134266 | 100.222036 |
| 99.703582  | 100.016646 | 99.3819081 | 100.28476  |
| 99.7779167 | 100.036736 | 100.069418 | 99.8545653 |
| 100.081328 | 100.07861  | 99.974472  | 99.9983714 |
| 99.8591614 | 99.8489089 | 100.039733 | 100.049163 |
| 100.421383 | 100.339777 | 99.4301743 | 100.066603 |
| 100.030445 | 100.042303 | 100.142837 | 99.9862856 |
| 99.9854258 | 100.088292 | 100.079389 | 100.146614 |
| 99.8939208 | 99.7854929 | 100.472996 | 99.9237146 |
| 100.083841 | 100.253851 | 100.067832 | 99.9358005 |
| 100.193772 | 100.21706  | 99.6214263 | 100.000819 |
| 100.259941 | 100.156307 | 99.804294  | 100.234122 |
| 99.9066938 | 99.9188601 | 100.037241 | 99.9024497 |
| 99.9925451 | 99.8322077 | 100.264296 | 99.7058636 |

99.8218894 99.7668554 100.286729 99.7203972  
99.9883573 99.84431 99.8006683 99.9174422  
99.5385799 99.6523678 100.08732 99.9585953  
99.5331357 99.8641577 100.40139 99.9273863  
99.6143804 99.6930315 100.56409 99.8758302  
99.7083981 99.6141246 100.358109 100.200924  
99.3633175 99.717236 99.3565287 100.226625  
99.6346915 99.934593 99.4267753 100.023614  
99.4112686 99.5611166 99.4387852 100.270685  
99.6996035 100.022698 99.6425002 100.364006  
99.6983472 99.8031622 100.029989 100.251715  
99.9184198 100.220691 99.6760373 100.33754  
99.9247016 100.265469 99.342706 100.234122  
99.9984082 100.007691 100.037694 100.247126  
99.8736096 100.218997 100.000984 100.14279  
99.8662808 99.9832442 100.299192 99.8793489  
99.8455509 99.9592817 99.9180481 99.8443153  
99.5915565 99.8643998 100.17796 99.8493638  
99.9684649 100.126535 100.019792 99.7926062  
99.5787835 99.4536483 100.099783 99.9766475  
99.8960147 99.9036112 99.443997 100.232592  
99.9508758 100.215366 99.8654765 100.262577  
100.0428 100.068686 100.359922 100.110816  
99.8635587 100.410455 100.169803 100.049469  
99.7395977 100.093375 99.9769646 99.9833789  
99.855183 100.159453 100.02863 99.9992894  
99.6434861 100.017615 99.7036827 99.9183601  
100.142052 100.29161 99.7231705 99.9561475  
99.6962532 99.6472848 100.535312 99.8479869  
100.08049 99.9798556 100.342927 99.9985244  
99.6043295 99.8280929 100.410454 100.051151  
99.8585333 99.8140543 99.6640274 99.8928116  
99.6954157 99.8961078 100.272453 99.6614979  
99.45566 99.7627406 100.336129 99.6980613  
100.128651 100.167683 100.004383 99.8753713  
99.6231749 99.6184814 100.049251 99.784651  
100.343489 100.360109 99.7279291 99.78511  
99.6078892 99.8871521 100.437873 99.6408448  
99.3444754 99.9101683 100.350735 99.7426419  
99.3208731 99.813265 100.27142 99.9349104  
99.3488617 99.725303 99.5863696 100.103758  
99.7344359 100.07691 100.080386 99.8493387  
99.485045 99.8374304 100.244906 99.7372841  
99.8077493 100.160764 100.054325 99.8321937  
99.224584 99.6054426 100.163779 99.978232  
99.2588387 99.8688455 99.4189027 100.256685



|            |            |            |            |
|------------|------------|------------|------------|
| 98.8456936 | 99.6114839 | 100.05999  | 100.43885  |
| 99.0802547 | 99.5749941 | 100.331699 | 100.313477 |
| 99.4938176 | 99.934092  | 99.9373928 | 100.276126 |
| 99.3624383 | 99.7429437 | 100.044581 | 100.465792 |
| 99.779343  | 100.317355 | 100.050246 | 100.269084 |
| 99.5884357 | 100.006347 | 99.9208501 | 100.148916 |
| 99.377268  | 100.073043 | 99.706701  | 100.316845 |
| 99.192418  | 99.7980408 | 99.6749752 | 100.117994 |
| 99.716682  | 100.187104 | 99.4173164 | 100.190401 |
| 99.8551629 | 100.373661 | 100.19981  | 100.075438 |
| 99.9247166 | 100.249692 | 100.152675 | 100.170501 |
| 99.8681128 | 99.9526994 | 100.008776 | 100.612596 |
| 100.003878 | 100.259117 | 100.209555 | 100.41053  |
| 99.6594516 | 99.6146254 | 100.431409 | 100.185809 |
| 99.6385646 | 100.038487 | 100.358666 | 100.286841 |
| 99.684516  | 100.071593 | 99.3187398 | 100.369351 |
| 99.7304674 | 100.01408  | 100.199357 | 100.200198 |
| 99.2939289 | 99.6822885 | 100.034836 | 100.180604 |
| 99.7611713 | 100.071593 | 100.121402 | 100.037474 |
| 99.8234146 | 100.175021 | 99.5945276 | 100.228671 |
| 100.049621 | 100.21876  | 98.9672633 | 100.162693 |
| 100.095781 | 99.9502829 | 99.9281017 | 100.180298 |
| 99.9126021 | 100.118232 | 99.4979906 | 100.015584 |
| 100.180583 | 100.370519 | 100.27006  | 99.9433298 |
| 100.135467 | 99.9855644 | 100.457469 | 100.292811 |
| 99.8608024 | 100.052986 | 100.004244 | 100.025534 |
| 99.990093  | 99.9688902 | 100.026452 | 99.8873025 |
| 100.208153 | 100.480713 | 100.065202 | 99.7019226 |
| 100.062571 | 100.130073 | 100.18984  | 99.777238  |
| 100.008474 | 100.176713 | 100.11619  | 99.6948809 |
| 100.014113 | 99.9580158 | 100.121856 | 99.7372841 |
| 100.183507 | 100.308172 | 100.0473   | 99.8580642 |
| 100.032076 | 100.015288 | 100.17375  | 100.067018 |
| 100.260789 | 100.279657 | 99.9419251 | 99.9440952 |
| 100.109149 | 99.9502829 | 100.246266 | 99.6953402 |
| 99.9669084 | 100.246792 | 99.7853356 | 99.7533575 |
| 99.9959413 | 99.934092  | 99.639397  | 99.710342  |
| 100.201887 | 100.112191 | 99.5365147 | 99.6685512 |
| 100.276036 | 100.127899 | 99.6115236 | 99.7937706 |
| 100.275827 | 100.173571 | 99.4481357 | 99.9359819 |
| 99.9230457 | 99.7320693 | 100.006963 | 99.9053659 |
| 99.843675  | 99.9406167 | 100.268248 | 99.909346  |
| 99.8190283 | 99.947383  | 100.105993 | 99.9933869 |
| 100.043146 | 99.9128265 | 100.308131 | 99.9613932 |
| 100.091813 | 99.9548743 | 100.007869 | 100.138201 |
| 100.13672  | 99.9879809 | 100.093982 | 100.315161 |

99.8152687 99.7272362 100.373396 100.135598  
99.9961502 100.069902 100.330793 100.338735  
99.9756809 99.8504797 100.079026 100.102074  
100.137555 100.022054 100.099194 99.9292464  
100.345172 100.055402 99.1863979 100.031657  
100.21254 100.215377 100.046847 100.04819  
100.599367 100.491588 100.038915 100.099624  
100.226743 100.12959 100.237202 100.104982  
100.394048 100.339346 100.036196 100.110646  
99.9163618 99.8717453 99.9831686 100.053088  
100.071761 99.9408584 99.4155035 100.232957  
99.834067 99.596743 100.300427 100.170041  
99.8685306 99.9297423 100.364331 100.165296  
99.8793918 99.9495579 100.344616 99.9665979  
99.8827337 99.8352555 100.032117 99.9148569  
99.9364133 99.6126922 99.7853356 100.014359  
100.378591 100.218519 98.9890181 99.983896  
100.59707 100.467664 99.3561309 99.9160815  
100.758526 100.532911 99.9473638 99.6783483  
100.300474 99.8758534 100.244453 99.6755929  
100.261624 100.021087 100.065429 99.7787688  
99.9547939 99.6537734 100.330339 99.760093  
100.160531 99.8741618 100.217486 99.7911683  
100.313215 99.8403303 99.9627735 100.00594  
100.166588 99.8357389 100.209555 100.118913  
99.983618 99.9790397 100.591624 99.8790362  
99.888791 99.7646926 100.567603 99.7665224  
100.110193 99.9667153 100.369544 99.8003531  
100.105389 99.838397 99.7051147 99.8536249  
100.174943 100.009246 100.150409 99.9554231  
99.6696862 99.6844634 100.065656 99.939962  
100.176405 100.112674 99.8059574 99.7795342  
99.8831515 99.7257863 100.027811 99.6769706  
100.130454 99.807707 99.9915533 99.49603  
100.207736 100.094792 99.5095478 99.8692391  
100.124396 99.8939775 100.057044 99.8847001  
100.237186 100.38671 100.276406 99.9721088  
100.09411 99.9514911 100.324674 99.8456647  
100.281467 100.182754 100.063616 99.7732579  
100.333893 100.021087 99.8564921 99.8089255  
100.471747 100.028095 99.8508267 100.025228  
100.626729 99.9998219 100.389485 100.111871  
100.397807 100.033895 100.119363 99.9868045  
100.344546 99.8359805 100.014441 99.8594419  
100.184969 99.5933599 100.01784 99.7404988  
100.301101 99.8717453 99.9251557 99.5108788

|            |            |            |            |
|------------|------------|------------|------------|
| 100.447519 | 100.002963 | 100.121629 | 99.7385087 |
| 100.853211 | 100.356465 | 100.116343 | 99.8530256 |
| 100.861179 | 100.352583 | 100.047037 | 99.8886576 |
| 100.695953 | 100.068708 | 100.273979 | 99.7478117 |
| 100.818824 | 100.371993 | 100.273526 | 100.133647 |
| 100.728453 | 100.082052 | 100.323806 | 99.9611451 |
| 100.854679 | 100.306484 | 99.5424207 | 99.938359  |
| 101.063518 | 100.493793 | 99.893931  | 99.9871427 |
| 100.77605  | 100.239518 | 100.150543 | 99.652691  |
| 100.791147 | 100.393102 | 100.239779 | 99.6224114 |
| 100.723421 | 100.105345 | 100.221434 | 99.5880028 |
| 100.806873 | 100.175222 | 100.228228 | 99.6092597 |
| 100.598453 | 100.250436 | 99.4450306 | 100.104132 |
| 100.300711 | 100.047356 | 100.180892 | 99.9995298 |
| 100.198179 | 100.194389 | 100.096865 | 99.6896994 |
| 100.53576  | 100.513203 | 100.118381 | 99.6091068 |
| 100.43763  | 100.263781 | 100.047717 | 99.6786886 |
| 100.064824 | 100.06434  | 99.6812583 | 99.7915489 |
| 100.130872 | 100.166487 | 100.014876 | 100.040056 |
| 99.7805011 | 99.798177  | 100.249065 | 100.020328 |
| 100.066082 | 100.248738 | 100.050435 | 99.8923279 |
| 100.058114 | 100.001257 | 99.9641425 | 99.8193816 |
| 99.9503399 | 100.058517 | 100.071498 | 99.9423351 |
| 99.9249689 | 99.8828543 | 99.616256  | 100.048925 |
| 100.103404 | 99.9083303 | 100.211921 | 100.290856 |
| 100.038614 | 99.9522461 | 100.332866 | 100.078287 |
| 99.9461463 | 100.260627 | 100.221207 | 100.134106 |
| 99.8192914 | 99.8105511 | 100.018047 | 99.9258189 |
| 99.8014688 | 99.9794205 | 100.085087 | 99.8933984 |
| 99.7666624 | 100.021153 | 100.160961 | 99.7415417 |
| 99.7215817 | 99.9389015 | 99.9179388 | 99.6945931 |
| 99.8956141 | 99.8971694 | 99.3634947 | 99.9247484 |
| 99.733114  | 99.6511442 | 99.7383334 | 99.9758261 |
| 99.7723237 | 99.7086471 | 99.9761464 | 99.8874342 |
| 99.4498396 | 99.5536075 | 100.261975 | 100.039903 |
| 99.7547108 | 99.7275721 | 100.284397 | 100.030574 |
| 99.7236785 | 99.7445561 | 100.296628 | 100.122636 |
| 99.8178237 | 100.022366 | 100.463323 | 100.16148  |
| 99.6146462 | 99.5400203 | 99.9066144 | 99.8450734 |
| 99.7689688 | 99.8692671 | 99.2611219 | 99.8219814 |
| 100.045114 | 100.333173 | 99.418305  | 100.170502 |
| 100.079921 | 100.083265 | 99.9752405 | 99.992954  |
| 99.8065011 | 99.7588712 | 100.199691 | 99.9545692 |
| 99.8402592 | 100.19633  | 100.137633 | 100.158574 |
| 99.5714526 | 99.5385646 | 100.020991 | 100.108567 |
| 99.8794689 | 99.7431004 | 100.134688 | 99.9360651 |

99.9834689 99.9621938 99.9118236 100.052137  
100.202792 100.088118 99.4053951 100.007788  
100.292953 100.065068 100.058588 99.8929396  
99.9044205 99.7918687 100.491181 99.9417234  
100.331534 100.246797 100.196973 100.044949  
100.240743 99.9881551 100.265146 99.9564044  
100.374308 100.322982 99.5329082 100.064065  
99.9683722 99.7608122 100.317238 99.908997  
100.074469 100.093213 100.08237 100.096027  
99.7775656 99.6237272 100.27715 100.123095  
99.9679528 100.076229 100.081464 100.044032  
99.7846946 99.8304466 99.3347307 100.07844  
100.000033 99.9631644 99.8239461 99.9680268  
100.118501 99.8248661 100.197879 100.027363  
100.13234 99.8277777 100.184969 100.136553  
100.229211 100.080354 100.002646 99.8718357  
99.9352431 100.0015 100.34872 99.7941487  
99.9276947 99.9862141 99.6751431 100.195888  
99.8811463 99.9607381 99.5632577 100.352027  
100.003388 100.056819 99.6398108 100.269752  
99.5964042 99.8260793 99.7668709 100.006564  
99.5309848 99.7933244 99.9093323 100.030268  
99.9834689 100.227387 99.8119422 100.029045  
100.167146 100.096853 99.4033567 100.137164  
100.10655 100.049055 100.074669 100.326029  
99.8140495 99.868054 100.51451 100.12126  
100.22963 100.280765 100.240459 100.081346  
100.130663 99.8420928 100.236155 100.125389  
100.198808 100.169156 99.5238487 100.195735  
100.02855 100.121601 99.6411698 100.298808  
100.199227 100.436047 99.8604107 100.2592  
100.173646 100.338996 100.025974 100.016658  
99.9843076 100.018241 100.163679 99.9735322  
99.8471785 100.061672 100.00944 100.05076  
99.6855172 99.8585915 100.277376 99.908844  
99.4689203 99.869995 100.193349 99.9775083  
99.5668397 99.510177 100.313841 99.8592956  
99.7100494 99.8947431 100.043867 99.8467556  
99.565372 99.8229251 100.073763 100.147716  
99.7557591 99.8658703 100.164358 100.239931  
99.8564044 100.12063 100.105698 100.110249  
99.9258076 99.9777221 100.125629 99.86893  
99.8094366 99.9471509 100.127441 99.8175465  
100.157921 100.066767 100.057229 100.126306  
100.006953 99.8743623 100.193802 100.038373  
99.7716946 100.07259 100.10298 100.109332

|            |            |            |            |
|------------|------------|------------|------------|
| 99.5873881 | 99.8357844 | 100.318144 | 100.199406 |
| 99.753872  | 100.09103  | 100.054285 | 100.125848 |
| 99.8876463 | 100.090059 | 100.245668 | 99.7733506 |
| 99.9966786 | 100.019939 | 100.053379 | 99.8906457 |
| 100.064614 | 100.015815 | 99.5177335 | 100.033327 |
| 99.9721463 | 99.9636496 | 99.0969177 | 100.215922 |
| 100.031066 | 99.9937355 | 99.7469399 | 100.109637 |
| 100.206566 | 100.41227  | 99.7564525 | 100.159492 |
| 99.939856  | 99.8804281 | 100.20105  | 99.9785788 |
| 99.8688373 | 99.6751728 | 99.8510773 | 100.029543 |
| 99.920585  | 99.7473019 | 99.8348726 | 100.048166 |
| 100.037062 | 99.837542  | 99.7923801 | 100.042498 |
| 100.230004 | 99.8548656 | 99.7812169 | 100.017802 |
| 100.324253 | 99.9914069 | 99.904913  | 100.054374 |
| 99.993672  | 99.726986  | 99.9207577 | 100.054509 |
| 100.035817 | 99.9055764 | 99.7585302 | 100.073672 |
| 100.022302 | 99.8112416 | 99.6951517 | 100.142362 |
| 100.328165 | 99.8608501 | 99.8427949 | 100.007951 |
| 99.9182733 | 99.7824215 | 99.8379335 | 99.9906769 |
| 99.9189846 | 99.7345454 | 99.8181277 | 100.048301 |
| 99.8924883 | 99.8444714 | 99.9198574 | 99.9246858 |
| 100.170077 | 99.9630592 | 99.8914091 | 99.8847403 |
| 100.037417 | 99.7241513 | 99.7905796 | 99.8419608 |
| 99.901024  | 99.5027244 | 99.5788377 | 99.8690859 |
| 100.166876 | 99.8005325 | 99.4722465 | 99.9492469 |
| 99.7504044 | 99.3488595 | 99.740525  | 99.9335926 |
| 99.8787956 | 99.6482425 | 99.655     | 100.061796 |
| 99.9244972 | 99.7531289 | 99.5048361 | 100.179473 |
| 99.9550835 | 99.7502941 | 99.6897501 | 100.444652 |
| 99.7246194 | 99.6202098 | 99.9915184 | 100.210917 |
| 99.4692595 | 99.2274369 | 99.8678222 | 100.178799 |
| 99.6378397 | 99.5694989 | 99.7362037 | 100.081364 |
| 100.116728 | 99.825573  | 99.7822972 | 99.943579  |
| 100.22787  | 100.146532 | 100.008623 | 99.8078181 |
| 100.004697 | 100.023849 | 99.9580286 | 99.890948  |
| 100.079918 | 100.074088 | 100.126558 | 99.7680076 |
| 100.001141 | 99.7852563 | 100.055797 | 100.165574 |
| 100.14358  | 99.7347029 | 100.013125 | 99.7441212 |
| 100.160118 | 99.7356478 | 100.171211 | 99.9064674 |
| 100.224136 | 99.67848   | 99.8231691 | 100.078935 |
| 99.8891096 | 99.7756495 | 99.4884513 | 100.038989 |
| 100.130421 | 100.074088 | 99.5658739 | 100.254236 |
| 99.8446528 | 99.7688776 | 99.8528778 | 99.9620673 |
| 99.728176  | 99.8151788 | 99.9445246 | 100.019826 |
| 99.9577509 | 100.107947 | 99.805524  | 100.089056 |
| 100.377601 | 100.392212 | 100.143123 | 99.9746177 |

|            |            |            |            |
|------------|------------|------------|------------|
| 100.128643 | 100.37536  | 100.096669 | 100.06598  |
| 100.053778 | 100.452214 | 100.083885 | 100.20201  |
| 99.944236  | 100.461978 | 100.54464  | 99.9580187 |
| 99.9223633 | 100.412055 | 100.404919 | 100.002283 |
| 99.6191679 | 99.9880997 | 100.3383   | 100.060717 |
| 99.6364171 | 100.100388 | 100.258536 | 100.103901 |
| 99.8942666 | 100.272049 | 100.27168  | 100.035211 |
| 99.7560948 | 99.9838475 | 100.092888 | 100.015103 |
| 100.069071 | 100.2952   | 100.20254  | 100.069083 |
| 99.8115769 | 100.205274 | 100.473339 | 99.9971545 |
| 99.7520048 | 100.147477 | 99.9585687 | 99.9698944 |
| 100.00772  | 100.267482 | 100.251334 | 99.9333227 |
| 99.7715658 | 100.103695 | 100.432467 | 99.9752925 |
| 99.7424021 | 99.7918707 | 99.9958396 | 100.05154  |
| 100.031371 | 100.079285 | 99.9540674 | 100.02455  |
| 100.030838 | 100.051095 | 99.9994407 | 100.016453 |
| 99.9623744 | 100.150784 | 100.256916 | 99.8271161 |
| 99.9817576 | 100.025897 | 100.247553 | 99.990272  |
| 100.389338 | 100.035661 | 100.082805 | 99.9299489 |
| 100.187859 | 100.079127 | 99.956048  | 99.9408799 |
| 99.9237859 | 99.7666728 | 100.122777 | 100.015238 |
| 99.3511822 | 99.3162596 | 100.025368 | 100.0371   |
| 99.755917  | 99.8644723 | 100.017986 | 99.9009344 |
| 99.8576342 | 99.8808509 | 100.140422 | 100.09378  |
| 99.5862698 | 99.610918  | 100.16707  | 100.025224 |
| 99.9630857 | 100.014085 | 100.008983 | 100.07934  |
| 99.8688373 | 99.8340773 | 100.246473 | 99.9734031 |
| 99.7313768 | 99.8269903 | 100.147804 | 99.9663857 |
| 99.8441193 | 99.8079344 | 99.9913383 | 100.177584 |
| 99.4434746 | 99.1949945 | 99.9960197 | 100.126573 |
| 99.8211796 | 99.8271478 | 100.199119 | 100.019961 |
| 100.129176 | 100.037078 | 99.9980003 | 100.058287 |
| 99.785792  | 99.5970592 | 99.8028232 | 100.030218 |
| 99.8457197 | 99.6685583 | 99.79202   | 100.185951 |
| 100.334389 | 100.118184 | 99.7707738 | 100.013619 |
| 99.649932  | 99.4876056 | 100.140242 | 99.9786662 |
| 99.9511713 | 99.9657365 | 100.063179 | 99.9561294 |
| 100.35395  | 100.516154 | 100.109633 | 99.9287343 |
| 99.8035747 | 99.9844775 | 99.9875572 | 100.019691 |
| 100.056801 | 100.426229 | 100.083525 | 99.984739  |
| 99.6984788 | 100.037866 | 99.9672113 | 99.9642265 |
| 100.091477 | 100.121019 | 99.9238186 | 99.9898672 |
| 99.9029801 | 100.036921 | 100.16653  | 99.8790723 |
| 99.5804015 | 99.9076238 | 100.062999 | 99.9763721 |
| 100.089343 | 100.251733 | 100.081905 | 100.163279 |
| 99.6129439 | 99.9882572 | 100.310392 | 99.8222579 |

99.7957503 100.093774 99.9281398 99.8437151  
100.143758 100.109995 100.001961 99.8978305  
100.605042 100.430481 100.143123 99.7852813  
100.491233 100.416937 100.017446 99.9063324  
100.645053 100.72262 99.8136264 99.9954002  
100.093789 100.278033 100.250254 99.9333227  
99.8960449 100.054244 100.109993 100.024145  
100.422413 100.419457 100.086586 100.155317  
100.073694 99.8309275 99.9654107 99.932513  
100.239429 100.436465 99.8939298 99.957209  
100.70178 100.669231 99.938943 100.028463  
100.676351 100.7527 99.9317409 99.7989114  
100.092722 100.151414 100.077944 99.9329178  
100.378134 100.358194 100.025548 100.034131  
100.429704 100.095506 100.120976 99.9318382  
100.401785 100.365596 99.9724328 99.9285994  
100.569654 100.661357 99.9652307 99.9111907  
99.7715346 100.395801 100.168747 99.9692511  
99.9046853 100.505399 99.9920921 99.8615793  
99.9119449 100.586139 100.186755 99.8538884  
99.7486935 99.9777497 100.122107 99.9974509  
99.8542226 100.28431 99.8249809 99.986117  
99.8864479 100.359531 99.8255212 99.9240505  
99.8251844 100.361581 100.143357 99.7845359  
99.792605 100.261286 99.973004 100.028889  
99.7669309 100.215397 100.05656 100.023357  
99.818456 100.228013 100.086452 100.006896  
99.5925247 100.230063 99.9016936 99.9969112  
99.9149549 100.11321 99.9233028 100.298878  
100.016412 100.305126 99.937709 100.070716  
99.8533373 100.396747 100.201341 100.055739  
100.006496 100.312853 100.19846 100.062081  
99.8664399 99.8246272 100.468935 99.8189423  
99.9330153 99.5098668 99.8701802 99.8352685  
100.157353 99.5335212 99.5516245 99.9793707  
100.265538 99.7902496 99.7308008 99.799243  
100.086174 99.8120116 99.8537932 99.78629  
99.6396232 99.4638197 100.020184 99.9718147  
100.025265 99.7743223 99.9913718 100.015801  
99.6633496 99.714398 99.9405902 99.9738386  
99.8595345 99.9919423 100.001096 100.035635  
100.028983 99.8422891 100.03477 100.109036  
100.333884 100.108006 100.231954 99.9127167  
99.9432849 99.9006365 100.108242 99.9827438  
99.858295 99.6719779 100.12769 100.000689  
99.8717518 99.8370852 100.090054 100.012698

|            |            |            |            |
|------------|------------|------------|------------|
| 100.030577 | 99.788988  | 100.302364 | 100.126171 |
| 99.9880816 | 99.9367488 | 100.183874 | 100.110385 |
| 99.9586893 | 99.8492277 | 100.050437 | 99.9642588 |
| 100.133981 | 100.088137 | 100.211245 | 100.159229 |
| 99.8627216 | 99.9157753 | 99.9414906 | 100.333824 |
| 99.7602026 | 99.8120116 | 100.229433 | 100.076788 |
| 99.7263837 | 99.8460738 | 99.8761227 | 99.9461786 |
| 100.042617 | 99.7793686 | 99.8575748 | 99.9507661 |
| 100.019953 | 99.5415636 | 99.9726438 | 99.9156851 |
| 100.116098 | 99.8022345 | 99.7624943 | 99.8452531 |
| 99.8136754 | 99.7664376 | 99.8118353 | 99.8775007 |
| 99.9590434 | 99.9127791 | 99.9202415 | 99.8828978 |
| 99.8308504 | 100.007081 | 99.8966515 | 99.9727592 |
| 100.131502 | 100.146326 | 100.002537 | 100.223049 |
| 99.6916795 | 99.6907437 | 100.205303 | 99.9225663 |
| 99.7607338 | 99.8730398 | 100.119046 | 100.025246 |
| 99.9916229 | 99.8831323 | 99.7378238 | 100.181491 |
| 100.018005 | 99.8586895 | 99.9319465 | 99.9568378 |
| 99.7874702 | 99.7243328 | 99.9825481 | 99.8730481 |
| 99.7972086 | 99.9400604 | 100.076548 | 99.980585  |
| 99.8150919 | 99.9756996 | 100.009379 | 99.976942  |
| 100.183735 | 100.100595 | 99.9654408 | 99.8953111 |
| 99.9386813 | 99.9009519 | 100.149839 | 99.8386417 |
| 99.7368304 | 99.9201908 | 99.7844637 | 100.018095 |
| 99.7471    | 99.9012673 | 100.012621 | 100.049938 |
| 99.9119449 | 100.148061 | 100.170548 | 100.025111 |
| 99.898134  | 100.143488 | 99.9409503 | 99.943615  |
| 100.255623 | 100.284941 | 99.9992952 | 100.056819 |
| 99.9092889 | 99.8738283 | 100.249422 | 99.9792357 |
| 99.8453695 | 99.7492487 | 100.05764  | 100.016476 |
| 99.858295  | 99.7167634 | 99.6931648 | 100.088392 |
| 100.355486 | 100.105798 | 99.8660384 | 100.025786 |
| 99.8820214 | 99.712821  | 100.035491 | 100.161117 |
| 99.8558162 | 99.8996903 | 99.8150767 | 100.047644 |
| 99.9108825 | 99.8561664 | 100.059801 | 100.062081 |
| 99.9583352 | 100.176288 | 99.9805672 | 100.094868 |
| 99.6421021 | 99.7855187 | 100.224571 | 100.124822 |
| 99.7035427 | 99.432596  | 99.871981  | 100.15599  |
| 100.042086 | 99.7940343 | 99.6006054 | 100.198357 |
| 99.9682507 | 99.8128001 | 99.5952031 | 100.376596 |
| 100.28112  | 100.075836 | 100.003077 | 100.171507 |
| 99.8377558 | 99.8567971 | 100.100858 | 99.9902998 |
| 100.048637 | 99.8416584 | 100.115085 | 99.9619651 |
| 99.9670112 | 99.9960423 | 99.9667013 | 99.852809  |
| 99.8983111 | 100.127876 | 100.132552 | 99.8675161 |
| 100.052178 | 100.321053 | 100.177211 | 99.9147406 |



|            |            |            |            |
|------------|------------|------------|------------|
| 100.347341 | 100.449733 | 100.166586 | 100.014991 |
| 100.063333 | 100.125668 | 100.006318 | 99.969521  |
| 100.426842 | 100.325784 | 100.048636 | 100.032127 |
| 100.283067 | 100.110845 | 99.8478507 | 100.001769 |
| 100.711558 | 100.417563 | 99.9596783 | 100.075978 |
| 100.416041 | 100.212085 | 100.077629 | 100.064914 |
| 100.12318  | 100.101225 | 99.8465901 | 100.029698 |
| 100.303606 | 100.348019 | 100.189456 | 100.127656 |
| 100.136814 | 99.8702013 | 99.9047549 | 100.022952 |
| 100.169924 | 99.9990386 | 99.7610537 | 99.913931  |
| 99.9337235 | 99.9563031 | 99.8797243 | 99.8497057 |
| 100.158947 | 100.170769 | 100.051157 | 99.9015177 |
| 100.199848 | 100.291091 | 99.9760653 | 99.8938269 |
| 100.249071 | 100.480326 | 100.19828  | 99.9580522 |
| 100.471638 | 100.391701 | 100.084291 | 99.9665526 |
| 100.702705 | 100.567216 | 99.9456323 | 99.8275777 |
| 100.231188 | 100.336192 | 100.208004 | 99.8526741 |
| 100.022963 | 100.212874 | 100.024146 | 99.9542742 |
| 99.9354941 | 100.077886 | 99.9409503 | 99.9904347 |
| 100.158947 | 100.388389 | 99.8165173 | 99.9167645 |
| 100.129554 | 100.279421 | 99.9521151 | 100.025246 |
| 100.131856 | 100.202624 | 99.9983948 | 99.9728942 |
| 99.8071241 | 99.9004788 | 100.180632 | 99.917574  |
| 99.84112   | 99.9127791 | 99.8426285 | 99.938083  |
| 99.5928463 | 99.3363264 | 99.6135695 | 99.9076231 |
| 99.8041534 | 99.5128237 | 99.6536866 | 99.9675373 |
| 99.8639473 | 99.7265937 | 99.8245889 | 100.099645 |
| 100.114941 | 99.8437365 | 100.094974 | 99.8629574 |
| 99.8411938 | 99.6493859 | 100.324163 | 99.7860406 |
| 99.6701021 | 99.2884044 | 99.7875301 | 99.8860325 |
| 99.6653398 | 99.2948253 | 99.8116363 | 100.072927 |
| 99.6831545 | 99.3967771 | 99.7376985 | 100.103559 |
| 99.852306  | 99.732858  | 99.8091177 | 100.244168 |
| 99.7919829 | 99.5837671 | 99.952136  | 100.125959 |
| 99.9299146 | 99.4486144 | 99.9208339 | 100.180205 |
| 99.7106702 | 99.3557458 | 99.988835  | 100.18142  |
| 99.7863386 | 99.4548787 | 99.7353599 | 100.05282  |
| 100.254636 | 99.6875983 | 100.089038 | 99.8656563 |
| 99.8355496 | 99.6725639 | 100.118901 | 99.7590523 |
| 99.67557   | 99.5123539 | 100.133652 | 100.034198 |
| 99.946671  | 99.5981751 | 100.021756 | 100.143231 |
| 100.062378 | 99.8442063 | 99.8857539 | 99.8872469 |
| 100.074549 | 99.9572773 | 99.6594433 | 99.8834686 |
| 99.9267397 | 100.15617  | 99.6711366 | 99.7473124 |
| 99.7690531 | 100.084756 | 99.7986837 | 99.859314  |
| 100.245111 | 100.583083 | 99.8638065 | 99.9189583 |

99.9634274 100.517151 100.292681 99.8837385  
99.7314835 99.9613491 100.06835 100.046208  
100.159389 100.445425 100.233495 100.048232  
100.530499 100.853075 100.409075 99.9216571  
100.678838 101.018767 100.496325 99.9016857  
100.041565 100.561784 100.48787 99.9145052  
100.350589 100.68065 100.157758 100.128253  
100.649735 100.909298 100.209209 100.167116  
100.319898 100.702262 100.508918 99.8468994  
100.186905 100.746112 100.447753 99.8751022  
99.8893464 100.302128 100.266596 100.081698  
100.286738 100.631162 100.009163 100.104638  
100.452538 100.322017 100.036508 100.160639  
100.064848 99.9663606 100.10343 99.8458198  
100.27492 100.539389 100.069069 99.7617511  
100.239644 100.453881 100.169092 99.6919863  
100.062378 100.379649 100.430303 99.7537896  
99.9960583 100.297117 100.1556 100.200852  
100.456595 100.553328 99.9972902 100.267108  
100.076489 100.043725 100.309951 100.195454  
100.081957 99.98578 100.134192 100.407043  
99.7965689 99.7021628 99.9141777 100.553319  
99.8359023 100.017885 99.8796374 100.373442  
100.426786 100.277697 99.7416563 99.9873737  
99.8071519 99.7265937 99.8012022 99.7904937  
100.209658 100.422716 99.672216 99.9563371  
100.50757 100.4946 99.9879355 100.034064  
99.9235648 99.9254859 100.072307 99.8460897  
99.8468381 99.955398 100.106308 100.035008  
100.085661 100.252014 100.177727 100.1574  
99.9128054 99.8983927 100.426885 100.038517  
100.02816 99.7265937 99.9638293 100.198692  
100.322367 99.974974 99.8076785 99.954178  
99.9625455 99.8158603 99.9456597 99.9320476  
99.7454177 99.7762384 99.6923644 100.021514  
100.485875 100.344569 99.8713621 100.017331  
100.056029 99.8752147 100.131314 99.9185534  
100.03839 100.023366 99.985417 99.9827857  
100.502984 100.17277 100.038846 99.9389296  
100.180555 99.9610359 100.052699 99.6465109  
100.165563 100.078805 100.018878 99.7821273  
100.189551 100.071914 99.722947 99.7556788  
99.9902377 99.993767 99.8481554 99.9041147  
100.164504 99.920631 99.8616477 99.9918268  
100.03839 100.021956 100.088498 99.9524238  
99.9921779 100.174493 99.8862936 99.9197679

|            |            |            |            |
|------------|------------|------------|------------|
| 100.320427 | 100.355062 | 99.9271303 | 99.7566233 |
| 99.9994096 | 99.9461582 | 100.153621 | 99.8118145 |
| 100.220771 | 100.222571 | 100.094794 | 99.7513606 |
| 100.261868 | 99.9120176 | 100.118181 | 99.9061388 |
| 100.047562 | 99.8841414 | 100.029492 | 99.7695778 |
| 100.014755 | 99.8410742 | 100.023915 | 99.9624095 |
| 99.8351968 | 99.4976327 | 99.7769161 | 100.21664  |
| 99.8614779 | 99.8329305 | 99.6648402 | 100.075895 |
| 99.616658  | 99.7904898 | 99.6927242 | 100.060107 |
| 99.7623505 | 99.5109444 | 99.7062165 | 99.9925015 |
| 99.702733  | 99.8384118 | 100.03255  | 99.9270548 |
| 99.7080245 | 99.6381101 | 99.8197317 | 99.8510826 |
| 100.103652 | 99.6968381 | 99.8339435 | 100.056194 |
| 100.009111 | 99.8435799 | 100.24285  | 99.8742925 |
| 99.6600483 | 99.596609  | 99.7020789 | 99.8122193 |
| 100.065906 | 100.00238  | 99.8152342 | 99.9062737 |
| 99.5970795 | 99.5955127 | 100.000708 | 99.8158628 |
| 99.6962068 | 99.7958144 | 99.8893519 | 100.114084 |
| 99.689857  | 99.7276899 | 100.047122 | 100.110171 |
| 99.3854196 | 99.4525296 | 99.9789407 | 100.103963 |
| 99.7831637 | 100.074733 | 99.9855969 | 100.028801 |
| 99.6501708 | 99.6639505 | 100.030031 | 99.9065436 |
| 99.5702692 | 99.6335685 | 100.087239 | 99.9031701 |
| 99.8565392 | 100.117018 | 99.908421  | 99.9788724 |
| 99.960958  | 100.096972 | 100.024994 | 100.028396 |
| 99.9078667 | 99.8830451 | 100.057016 | 100.153622 |
| 100.044564 | 100.345665 | 100.053598 | 100.247676 |
| 100.172618 | 100.048423 | 100.045323 | 100.37884  |
| 99.6939138 | 99.6656731 | 100.128795 | 100.324053 |
| 99.8124434 | 99.8287021 | 100.04982  | 100.35401  |
| 99.5900241 | 99.3842485 | 99.6596232 | 100.238905 |
| 99.8004493 | 99.7455432 | 99.6607025 | 99.8379932 |
| 99.6794504 | 99.6927663 | 99.8724415 | 99.7926528 |
| 100.769459 | 100.753436 | 99.9416987 | 99.971504  |
| 100.621968 | 100.767021 | 100.181658 | 99.8364325 |
| 100.500662 | 100.579041 | 99.9989862 | 99.7122909 |
| 100.833051 | 100.804459 | 100.00367  | 99.7529068 |
| 100.539495 | 100.68788  | 100.23282  | 99.7048694 |
| 100.569598 | 100.862275 | 99.9914199 | 99.7662655 |
| 100.702305 | 101.009658 | 100.144006 | 99.8294158 |
| 100.357625 | 100.44003  | 100.259302 | 99.7852916 |
| 100.596318 | 100.355044 | 100.036818 | 99.9534225 |
| 100.421751 | 100.385373 | 100.049788 | 99.7507478 |
| 100.369025 | 100.006253 | 100.080954 | 99.9070043 |
| 100.769816 | 100.148739 | 100.101131 | 100.099289 |
| 100.346937 | 99.7054843 | 100.502864 | 100.002944 |

|            |            |            |            |
|------------|------------|------------|------------|
| 99.8937763 | 99.5342483 | 99.8986429 | 100.07473  |
| 99.9701937 | 99.4641111 | 99.9806109 | 100.002    |
| 100.063712 | 99.6991657 | 99.8373921 | 99.9281894 |
| 100.280851 | 99.773884  | 99.94332   | 99.9383096 |
| 100.282276 | 99.8080048 | 100.020784 | 99.7430564 |
| 100.052133 | 99.7367618 | 100.283082 | 99.8062067 |
| 100.027908 | 99.9654977 | 99.9721439 | 99.8604512 |
| 99.9750032 | 99.7988427 | 100.153374 | 100.104282 |
| 100.028442 | 99.8700858 | 99.9490848 | 99.9890457 |
| 100.205859 | 99.897414  | 99.9966442 | 99.9594946 |
| 100.037705 | 100.12378  | 100.070506 | 99.7288881 |
| 99.8419407 | 99.8952025 | 99.9528679 | 99.8435842 |
| 100.017754 | 100.294858 | 100.185261 | 99.7852916 |
| 99.7940239 | 100.099296 | 100.262185 | 99.767345  |
| 99.9787439 | 100.139893 | 100.059156 | 99.8605862 |
| 99.7844049 | 99.7143305 | 99.9051283 | 100.047878 |
| 100.007245 | 99.8980459 | 99.8390135 | 99.9080838 |
| 99.9201394 | 99.7762535 | 99.6298599 | 100.042616 |
| 100.082593 | 100.054907 | 99.6448123 | 100.138151 |
| 99.5512338 | 99.8108482 | 99.8981025 | 100.136666 |
| 99.8193183 | 100.031844 | 99.6235547 | 100.044235 |
| 99.7236629 | 99.7590351 | 99.6401284 | 99.9358807 |
| 99.6281857 | 99.5331426 | 99.9364743 | 100.080803 |
| 99.7323912 | 99.7719884 | 99.6876879 | 99.937365  |
| 99.5938067 | 99.6530394 | 99.8368517 | 100.017787 |
| 99.6698679 | 99.7552439 | 99.7930753 | 100.033305 |
| 99.5686905 | 99.6659926 | 99.8354105 | 99.9743377 |
| 99.3442477 | 99.6840009 | 99.7040815 | 99.9953878 |
| 99.482476  | 99.8264869 | 99.8883744 | 99.9836483 |
| 99.6607833 | 99.7699348 | 99.8038843 | 99.9828387 |
| 99.8895012 | 99.6857385 | 100.12455  | 100.08566  |
| 100.078318 | 99.8301202 | 99.9501657 | 99.9975467 |
| 100.020604 | 99.9160541 | 99.8487415 | 100.060022 |
| 100.198199 | 100.102929 | 99.5662672 | 99.9669161 |
| 99.9461462 | 99.8898316 | 99.4497105 | 99.9352061 |
| 99.8291154 | 99.6293443 | 99.5729327 | 100.055839 |
| 99.657577  | 99.5898526 | 99.8409951 | 100.127086 |
| 99.907136  | 99.9852435 | 99.8934186 | 99.9361506 |
| 99.7820893 | 99.8029499 | 100.086719 | 99.9319676 |
| 99.8581504 | 99.7707246 | 99.9557503 | 100.024129 |
| 100.108244 | 99.9460678 | 100.069244 | 100.046934 |
| 99.6996155 | 99.5078679 | 100.029431 | 100.032495 |
| 99.8371312 | 99.8143235 | 99.8851317 | 100.118585 |
| 99.7738953 | 99.7277577 | 100.074469 | 100.113862 |
| 100.105572 | 99.7860474 | 100.16022  | 99.9306182 |
| 99.6333514 | 99.7557178 | 100.023847 | 99.9728534 |

|            |            |            |            |
|------------|------------|------------|------------|
| 99.6641677 | 99.7242824 | 100.213544 | 99.967186  |
| 99.6826932 | 99.9263219 | 100.427922 | 99.9663764 |
| 99.9249489 | 100.251892 | 100.122208 | 99.9789255 |
| 99.9641373 | 100.029158 | 100.050149 | 100.088089 |
| 100.161326 | 100.047009 | 100.3537   | 100.012255 |
| 100.056586 | 100.034529 | 100.456566 | 100.195903 |
| 99.8401594 | 99.9478054 | 99.9676402 | 100.224375 |
| 99.8063148 | 99.8395982 | 100.164183 | 100.254736 |
| 99.7826237 | 100.004042 | 100.158779 | 100.043695 |
| 99.9028609 | 100.102139 | 100.276777 | 100.017787 |
| 99.9203175 | 99.9816103 | 99.9379155 | 100.240163 |
| 99.8884324 | 100.038478 | 100.058976 | 100.175258 |
| 100.032895 | 100.432921 | 100.159499 | 100.223161 |
| 100.148679 | 100.458512 | 100.182018 | 100.282398 |
| 100.169164 | 100.414913 | 100.032134 | 100.143278 |
| 100.316833 | 100.345092 | 100.22111  | 99.9639475 |
| 100.936366 | 100.753594 | 99.9334118 | 99.9871566 |
| 100.820582 | 100.667186 | 100.189945 | 99.9037659 |
| 100.786025 | 100.717736 | 100.241467 | 99.8815013 |
| 100.048392 | 99.9332725 | 100.411348 | 99.8574826 |
| 99.9990506 | 99.7020091 | 99.713089  | 99.9219823 |
| 100.325918 | 100.044797 | 99.9254852 | 100.032765 |
| 100.462365 | 100.373052 | 99.8876538 | 99.963003  |
| 100.335893 | 100.40275  | 100.080954 | 99.9327772 |
| 100.104503 | 100.04764  | 100.177694 | 100.069468 |
| 100.360475 | 100.245099 | 100.129234 | 100.177957 |
| 99.9796345 | 100.041164 | 99.8617123 | 100.248529 |
| 99.9929942 | 100.298018 | 99.8831501 | 100.382116 |
| 99.8761415 | 100.197235 | 100.036457 | 100.269039 |
| 99.9636029 | 100.074179 | 100.134098 | 99.9845928 |
| 99.9012577 | 100.041796 | 100.030692 | 99.8873036 |
| 99.696231  | 99.9446461 | 99.9681806 | 99.9238714 |
| 99.7922426 | 100.161534 | 100.168687 | 99.8945902 |
| 100.026126 | 100.435291 | 99.9485443 | 99.8330591 |
| 100.019357 | 100.305442 | 100.014299 | 99.9598994 |
| 99.7754985 | 99.9392752 | 99.9362942 | 99.8895975 |
| 99.9764282 | 100.079076 | 100.028891 | 99.9423577 |
| 99.8392687 | 100.010044 | 99.7078646 | 100.027233 |
| 100.049996 | 100.174172 | 99.9244043 | 100.088224 |
| 99.8072055 | 100.05001  | 99.9798903 | 99.9540972 |
| 99.9545183 | 100.185387 | 99.9654784 | 99.8956697 |
| 99.8447828 | 99.5031516 | 100.708574 | 100.119572 |
| 99.7116901 | 99.293633  | 99.9302258 | 100.150679 |
| 99.6318345 | 98.9516035 | 99.8185852 | 99.8970166 |
| 100.080289 | 99.3425982 | 99.8123132 | 99.9822775 |
| 100.049761 | 99.4079819 | 100.227516 | 99.8941887 |

|            |            |            |            |
|------------|------------|------------|------------|
| 99.7022157 | 99.0913794 | 100.297762 | 99.9947203 |
| 99.8122992 | 99.3221113 | 100.037894 | 100.034876 |
| 99.8198185 | 99.5277068 | 100.289817 | 99.9486256 |
| 99.7398125 | 99.2003522 | 100.071763 | 99.9148323 |
| 99.8235782 | 99.2218562 | 100.026605 | 99.884998  |
| 99.9359174 | 99.3237096 | 99.8597709 | 99.9672897 |
| 99.7542497 | 99.0534568 | 100.293789 | 99.7639642 |
| 99.8819284 | 99.4056572 | 99.9643033 | 99.9022482 |
| 99.7799659 | 99.3699141 | 100.092251 | 100.160718 |
| 99.8208712 | 99.1200029 | 100.002353 | 100.173302 |
| 99.5626564 | 98.8911598 | 100.099777 | 100.166091 |
| 99.8434293 | 99.3059833 | 100.104168 | 100.123531 |
| 99.6820638 | 99.2728556 | 100.093296 | 99.9913268 |
| 99.8330526 | 99.6018084 | 99.6975367 | 100.216286 |
| 100.009908 | 99.64903   | 100.085979 | 100.201015 |
| 99.9787778 | 99.9094026 | 99.8879947 | 99.9513121 |
| 99.976522  | 99.5866975 | 100.271838 | 99.9146909 |
| 99.891854  | 99.7190632 | 100.031831 | 99.8073724 |
| 100.03397  | 99.6901491 | 100.245704 | 99.8775041 |
| 99.8405719 | 99.6997387 | 99.927926  | 100.168636 |
| 99.682515  | 99.3177524 | 100.065491 | 100.107836 |
| 99.8438805 | 99.5638858 | 100.117548 | 100.386101 |
| 100.215036 | 100.097127 | 100.330794 | 100.239333 |
| 100.241053 | 100.282671 | 100.560765 | 100.097656 |
| 100.370837 | 100.577479 | 100.397276 | 100.103029 |
| 100.481372 | 100.579223 | 99.9293895 | 100.005042 |
| 99.9960723 | 100.194476 | 100.10354  | 99.9080453 |
| 100.182402 | 100.263492 | 100.126956 | 100.184048 |
| 99.9229841 | 99.8552067 | 99.998799  | 100.006456 |
| 100.148565 | 100.286449 | 99.9873004 | 100.150254 |
| 99.8942602 | 99.8671211 | 100.09685  | 100.046329 |
| 99.9491515 | 100.019393 | 100.211418 | 99.9030965 |
| 100.169469 | 100.150741 | 99.9354524 | 99.9950031 |
| 100.060588 | 100.068794 | 99.7090353 | 99.9175188 |
| 100.260603 | 100.245184 | 99.9402609 | 100.236081 |
| 100.073522 | 100.132143 | 99.8610253 | 100.174291 |
| 99.7422187 | 99.9201546 | 100.416928 | 99.9621995 |
| 99.9781763 | 100.132579 | 99.9705753 | 100.00377  |
| 100.019382 | 100.012128 | 100.221662 | 99.9745008 |
| 100.140143 | 100.19186  | 99.9206088 | 99.9671483 |
| 100.151873 | 100.279765 | 99.9904364 | 99.8514875 |
| 100.157287 | 100.320594 | 99.8129404 | 99.8598298 |
| 100.120292 | 100.094511 | 99.6787209 | 100.166373 |
| 99.9948692 | 100.173408 | 99.6860381 | 99.8506391 |
| 100.268574 | 100.239372 | 99.6599051 | 99.8792008 |
| 99.9157656 | 100.110784 | 99.8125223 | 99.8311267 |

99.8190666 99.967812 99.986046 99.958806  
99.679808 99.9298895 99.9170547 100.134701  
99.8652355 99.9941108 99.6780937 100.062731  
100.103599 100.128365 99.7136347 100.176412  
100.09608 100.128801 99.992318 100.03021  
100.238196 100.361422 100.13051 99.9169532  
100.082244 100.107152 100.240269 100.286983  
100.10014 100.151322 100.218735 100.025262  
100.151573 100.12575 99.9201906 99.9658758  
100.187515 100.273517 99.530494 99.8348029  
99.8489936 99.9861195 99.8292475 99.8584158  
100.203456 100.21874 99.8334288 99.9777529  
99.7362032 99.6982857 99.9484144 99.8616679  
99.9918615 100.076204 100.098941 100.308192  
99.8774168 99.950667 100.141172 100.252483  
99.8289921 99.9035907 99.7838804 100.056368  
100.114277 100.187937 99.9994262 100.018757  
100.013066 100.007188 100.284172 99.8372066  
99.9589267 100.064435 99.9254173 100.042936  
99.8407223 99.8865909 99.9224904 99.9463633  
99.9323082 99.9265476 100.028277 100.028796  
99.9419329 100.105263 99.6226915 99.9621995  
99.9410306 99.9540088 99.9918999 100.04237  
100.027353 100.171809 99.8790049 100.034311  
99.9483996 100.05252 100.004653 100.004618  
100.100291 100.338029 99.7767722 99.9196397  
99.9276461 100.234287 100.102077 99.8070896  
100.015923 100.178057 100.002771 99.806524  
100.012013 100.294585 99.785762 99.8611023  
100.101644 100.29662 99.9856279 100.162414  
99.9094493 100.141587 99.7192794 99.8775041  
99.9264431 100.205228 100.214972 100.168211  
99.9850941 100.053537 100.061727 100.01805  
99.9261423 100.110494 100.005698 99.8483768  
100.074274 100.348927 99.921445 99.9240229  
99.9909592 100.260441 99.7709184 99.8161388  
100.380612 100.37508 99.8553806 99.9860952  
100.227819 100.429421 100.078244 99.705851  
100.34467 100.539266 99.9693209 100.092848  
100.057581 100.442789 99.876078 99.768913  
100.101343 100.405447 99.9668121 99.8247639  
100.087658 100.308098 99.8254843 99.8328234  
100.051415 100.238501 100.157061 99.8017166  
100.009306 100.137664 100.11044 100.058348  
99.867792 100.118631 100.126119 100.033462  
100.056528 100.277731 100.341038 100.067963

|            |            |            |            |
|------------|------------|------------|------------|
| 100.023894 | 100.391353 | 99.9538501 | 99.975632  |
| 100.078184 | 100.298944 | 99.9824919 | 100.07376  |
| 100.21278  | 100.370285 | 100.163333 | 99.9685623 |
| 100.369172 | 100.730789 | 99.851572  | 99.7971374 |
| 100.106681 | 100.589864 | 100.085701 | 99.8378357 |
| 100.093587 | 100.607789 | 100.053509 | 99.9197976 |
| 100.095844 | 100.496447 | 100.015253 | 100.079341 |
| 100.153641 | 100.473713 | 100.192732 | 100.109158 |
| 100.230702 | 100.579079 | 100.017344 | 99.8395315 |
| 99.9934973 | 100.47211  | 100.27844  | 99.8792406 |
| 100.099156 | 100.637956 | 100.541208 | 100.080613 |
| 100.084707 | 100.542354 | 100.159494 | 99.8634135 |
| 100.296325 | 100.684883 | 99.8549167 | 100.051078 |
| 100.279317 | 100.6467   | 100.052463 | 100.021402 |
| 100.189312 | 100.470069 | 100.568593 | 99.771277  |
| 100.380309 | 100.820562 | 100.146742 | 99.8530976 |
| 100.10051  | 100.608809 | 99.7516489 | 99.8180518 |
| 100.080342 | 100.559842 | 99.9999933 | 99.8562065 |
| 100.07101  | 100.626152 | 100.133991 | 99.7448513 |
| 100.328082 | 100.979122 | 99.9640377 | 99.7750924 |
| 100.188559 | 100.829744 | 99.90885   | 99.8304874 |
| 100.106681 | 100.597296 | 99.8124807 | 99.9132972 |
| 100.223026 | 100.674827 | 99.7136029 | 100.041186 |
| 100.060023 | 100.592487 | 99.9765803 | 100.11156  |
| 100.287745 | 100.748569 | 100.105979 | 100.148443 |
| 100.021643 | 100.228295 | 100.811502 | 99.9607786 |
| 99.9451834 | 99.8364131 | 100.44024  | 100.226166 |
| 99.8625531 | 99.3595679 | 100.23036  | 100.192533 |
| 99.86752   | 99.4652258 | 100.35934  | 100.115658 |
| 100.172304 | 99.6006137 | 100.153223 | 100.152683 |
| 99.8800123 | 99.3503866 | 100.230151 | 100.110006 |
| 99.8917522 | 99.6759588 | 99.9462689 | 100.040197 |
| 99.8243234 | 99.500348  | 100.10577  | 100.050654 |
| 99.6780272 | 99.5310981 | 99.8093451 | 99.9630396 |
| 99.6455169 | 99.3178876 | 100.020898 | 99.9491909 |
| 99.7501217 | 99.3624826 | 100.27405  | 100.039914 |
| 100.152888 | 99.9779219 | 100.204229 | 100.095592 |
| 100.049036 | 99.7386249 | 100.147787 | 99.962757  |
| 100.109089 | 99.7259459 | 99.894217  | 100.099973 |
| 100.006291 | 99.8761988 | 99.7485132 | 100.104919 |
| 99.7344686 | 99.8085777 | 100.197122 | 100.065209 |
| 99.9734794 | 99.762234  | 100.186461 | 100.027337 |
| 99.9313364 | 99.5258516 | 100.115177 | 99.8685008 |
| 100.160414 | 100.046126 | 100.088419 | 100.104495 |
| 99.9772422 | 99.8419511 | 100.040966 | 100.324096 |
| 100.116314 | 100.167086 | 100.051    | 100.314911 |



|            |            |            |            |
|------------|------------|------------|------------|
| 100.038199 | 100.171604 | 99.7809151 | 100.076656 |
| 99.9417217 | 100.225526 | 99.6552796 | 99.9754752 |
| 99.7585503 | 99.7491178 | 100.061034 | 100.036381 |
| 99.7532824 | 99.5386763 | 100.05539  | 100.109723 |
| 99.8387724 | 99.5558731 | 100.104515 | 100.021826 |
| 100.032028 | 99.6106695 | 100.508179 | 99.9863564 |
| 100.088469 | 99.5984277 | 100.099498 | 99.9599307 |
| 100.343735 | 99.8906266 | 99.9964395 | 99.8238457 |
| 100.074622 | 100.05385  | 99.6922804 | 99.756439  |
| 100.104574 | 100.129924 | 99.7905311 | 100.197196 |
| 99.9200481 | 99.8485091 | 99.9721904 | 100.091211 |
| 100.047982 | 99.9397393 | 99.8028647 | 99.9860738 |
| 99.718364  | 99.6303437 | 100.206738 | 100.011228 |
| 99.8929562 | 100.065654 | 99.7800789 | 100.121452 |
| 99.8998797 | 99.8174676 | 99.9730266 | 99.9255915 |
| 100.092232 | 99.9642228 | 99.7152752 | 99.9737795 |
| 99.9311859 | 99.8770732 | 99.9711452 | 99.919515  |
| 99.8888925 | 100.078916 | 99.7880226 | 99.9000137 |
| 99.8437393 | 99.8005623 | 99.8252324 | 99.9014269 |
| 99.9254665 | 99.8110552 | 99.9688457 | 99.7536128 |
| 100.036092 | 99.8963103 | 99.7395243 | 99.8419338 |
| 99.9260686 | 100.121617 | 100.223252 | 99.8639787 |
| 100.03549  | 100.268226 | 99.6791106 | 100.023381 |
| 99.9758876 | 100.122491 | 99.481773  | 99.9812691 |
| 99.7719458 | 100.039276 | 100.073159 | 100.106614 |
| 99.811229  | 99.8594393 | 100.091555 | 99.9183845 |
| 100.078084 | 100.147558 | 99.74266   | 100.050089 |
| 99.7639687 | 99.8954358 | 99.9711452 | 99.9335051 |
| 100.091781 | 100.175247 | 99.8275319 | 99.9467886 |
| 99.9347982 | 99.8483634 | 99.8597247 | 99.9829649 |
| 99.8776042 | 99.8103266 | 100.032186 | 99.9739208 |
| 99.8858822 | 99.8880034 | 100.078594 | 99.8899805 |
| 99.9665559 | 99.7900694 | 100.039084 | 100.131486 |
| 99.9235099 | 99.6229112 | 100.054972 | 100.147878 |
| 99.8800123 | 99.8129498 | 99.927455  | 99.8930894 |
| 99.7389839 | 99.632384  | 99.9023697 | 99.9203629 |
| 99.9360023 | 99.8289806 | 100.176426 | 100.089798 |
| 99.8792598 | 99.9000994 | 100.038875 | 100.095027 |
| 100.021492 | 100.109958 | 99.8250234 | 100.131486 |
| 100.128355 | 99.9374076 | 99.870804  | 100.021967 |
| 100.297679 | 100.254236 | 99.6182788 | 100.04373  |
| 100.390845 | 100.368346 | 99.7255184 | 100.105343 |
| 100.367366 | 100.58622  | 99.9581844 | 100.146323 |
| 99.7686345 | 100.056182 | 100.10138  | 100.147595 |
| 99.81153   | 99.7097693 | 99.7675363 | 99.9801386 |
| 100.086663 | 99.8314581 | 99.899234  | 99.9522998 |

99.9746835 99.691261 99.9203475 99.837977  
99.925617 99.7208452 99.7934577 100.056024  
99.9304334 99.4528384 100.159076 99.9997812  
99.88227 99.600468 99.9642467 100.00289  
99.9069537 99.8142614 100.211755 100.109582  
100.159811 100.147558 99.9397886 99.9571045  
100.066495 99.9973047 99.9650829 100.005292  
99.8873874 100.067549 99.9772075 99.8699139  
100.28609 100.334681 99.8620242 99.9384511  
99.9417217 100.111852 99.7301174 99.8480103  
99.9125585 99.7827322 100.162532 99.9932535  
100.005085 99.8389036 99.9921643 99.8685758  
100.128454 99.9345546 100.040243 100.121465  
100.076248 99.7714108 100.047978 100.205997  
99.8472633 99.4494776 100.348159 99.9878819  
99.7348772 99.4526709 100.157933 100.019405  
99.8382363 99.394032 100.074735 99.9675263  
100.044654 99.5862049 100.113198 100.196668  
100.108143 99.562401 99.7712096 100.105209  
100.202776 99.7641535 100.183854 100.024494  
100.148614 99.8875274 99.5642605 99.9293597  
99.9552863 99.7087079 99.9700061 100.227908  
99.9483656 99.7753297 99.8797011 100.273708  
99.7991193 99.3210237 99.9582999 100.147616  
99.6891405 99.2442416 100.278967 100.114539  
100.094904 99.6751792 100.363418 100.528576  
100.239637 99.9859361 100.439927 100.185076  
100.249265 100.287694 100.316385 100.138004  
100.258894 100.226733 100.172356 100.448426  
100.082416 100.024109 100.089786 100.112842  
100.163509 99.9643094 100.252418 100.218861  
100.01682 99.9320871 100.235486 99.8234826  
99.9271522 100.066202 99.9043677 99.8304091  
100.037582 100.061412 99.6844582 100.002866  
99.9069919 99.7937632 100.027074 99.7858813  
100.071735 100.067943 100.108181 100.07411  
99.861556 99.8793992 100.045887 99.8133048  
100.115666 100.085651 100.160441 99.8868109  
100.239787 100.19393 99.7636841 99.8873764  
100.029308 99.9476177 100.091667 99.9895782  
99.9646142 99.8776575 99.8941248 99.8080745  
100.106037 99.9545847 99.9969722 99.7371128  
100.085275 100.139936 99.7302378 99.72849  
99.9844736 99.8513861 99.8909892 100.017284  
99.9176738 100.055461 100.013068 99.9097109  
99.8624587 99.9477628 100.101492 99.7793789

99.9424981 100.053139 100.043797 100.033682  
99.7169737 99.9062512 100.250746 100.00852  
99.9393386 100.075636 100.078916 100.004138  
100.020882 100.090441 99.990701 99.9572072  
100.225494 100.341979 100.083933 100.092063  
100.044353 100.112068 100.013277 100.066477  
99.9173729 99.9045094 100.19995 100.224232  
99.9534809 99.817422 99.6512209 99.9351554  
100.096709 99.7667661 99.9415768 100.030148  
99.9757475 100.130501 99.6606277 99.98873  
99.7231421 99.8804152 99.6073226 99.940527  
100.035777 100.028028 99.5375034 99.8897795  
99.8447056 99.9532784 99.7862604 99.9050461  
100.231964 100.101327 99.9890287 100.061247  
100.288984 100.325867 99.9196276 100.128674  
100.169828 100.137468 100.320774 100.004279  
99.9781547 100.057928 100.294435 99.8352153  
100.01336 100.16461 99.9261078 99.8962819  
99.9977132 100.121212 100.016204 100.099837  
99.938135 99.9608259 99.9593451 99.8992504  
100.059548 100.147628 99.9204638 99.9690813  
99.9698799 100.091022 99.9806671 99.9184751  
99.9819159 100.002483 99.9037406 99.9621547  
99.6888396 99.8284531 100.151661 99.9911331  
99.9282053 99.9734536 100.019758 99.9311973  
100.08362 99.8750448 99.6652265 99.8928893  
100.066469 99.9413764 99.9894468 99.9095696  
100.081213 100.199591 99.9654073 100.064498  
100.065867 100.087538 100.344187 100.075524  
100.142596 100.212073 100.229006 100.178574  
100.083319 100.209606 99.826605 100.020112  
100.07038 100.108584 100.000944 100.377606  
99.9355774 100.160546 99.9507745 100.092911  
100.104533 100.165336 100.113198 99.974877  
99.9078946 100.101908 100.150407 99.8705548  
100.070832 100.266212 100.27395 99.9254017  
100.205484 100.395537 100.177582 99.8005826  
99.9864294 100.291468 100.342515 99.8834183  
100.082567 100.13921 99.9491022 99.9292183  
99.9209837 99.7288831 99.7237576 99.9615893  
100.150721 99.9727279 99.6869666 99.9706362  
100.000873 100.071717 99.7327463 99.8172628  
100.022537 100.169981 99.8523169 100.233845  
99.8225895 100.021061 100.16943 100.355978  
99.9229396 100.180722 100.267678 100.204301  
100.074292 100.300757 99.6257181 99.8692825

|            |            |            |            |
|------------|------------|------------|------------|
| 100.214662 | 100.241683 | 99.8098819 | 100.014316 |
| 100.01005  | 100.072008 | 99.7910683 | 99.8858214 |
| 100.05699  | 100.206122 | 100.114661 | 99.9996146 |
| 100.057442 | 100.260987 | 100.102537 | 99.978835  |
| 99.9077441 | 100.206703 | 100.084769 | 99.9740288 |
| 99.9245945 | 100.269261 | 99.6313621 | 100.021666 |
| 99.8422984 | 100.190446 | 100.022684 | 99.7512486 |
| 99.8833713 | 100.127308 | 100.085605 | 99.8223517 |
| 99.9306125 | 99.8756254 | 99.9281982 | 99.7183122 |
| 100.295453 | 100.143274 | 99.6898932 | 99.8968474 |
| 99.9769511 | 99.5214699 | 99.5293509 | 99.8404455 |
| 100.015015 | 99.6056544 | 99.7806163 | 99.9002399 |
| 100.017121 | 99.9007356 | 99.8215881 | 100.003573 |
| 99.9285062 | 99.9502303 | 100.303842 | 100.329686 |
| 99.7592501 | 99.9172822 | 100.291509 | 100.043012 |
| 99.641147  | 99.7818613 | 100.419441 | 99.8207967 |
| 99.7873842 | 100.028899 | 99.8328762 | 99.9249776 |
| 99.6467136 | 99.8558856 | 100.085187 | 100.124292 |
| 99.6698829 | 100.009595 | 100.313667 | 100.076089 |
| 99.8192564 | 100.39212  | 100.18885  | 100.135969 |
| 99.9209374 | 100.229884 | 99.9698481 | 100.190255 |
| 100.006825 | 100.358624 | 100.001821 | 100.057226 |
| 99.9991535 | 100.558725 | 100.036719 | 100.094406 |
| 99.8216631 | 100.286099 | 99.7989094 | 100.113067 |
| 99.9794491 | 100.48285  | 99.9721468 | 100.262495 |
| 100.022769 | 100.449063 | 100.070572 | 100.199161 |
| 100.176494 | 100.68863  | 100.035047 | 100.088045 |
| 100.196048 | 100.699698 | 100.082275 | 99.9102017 |
| 100.356541 | 100.950043 | 99.9978503 | 100.241289 |
| 100.178299 | 100.646251 | 100.291873 | 100.430442 |
| 100.148516 | 100.308381 | 100.470753 | 100.344348 |
| 99.7778922 | 99.4015201 | 100.522787 | 100.171736 |
| 99.6659829 | 99.3913257 | 100.121143 | 100.191527 |
| 99.9155224 | 99.5783193 | 100.693307 | 100.279177 |
| 100.184766 | 99.6450195 | 100.177566 | 100.145158 |
| 100.177847 | 99.450453  | 100.288112 | 99.9791901 |
| 100.219663 | 99.7192927 | 99.7596228 | 99.8183114 |
| 100.028785 | 99.5353574 | 100.133682 | 99.8079914 |
| 99.8794227 | 99.6655539 | 100.041107 | 99.9167047 |
| 99.8893501 | 99.4217631 | 100.630825 | 99.8728801 |
| 100.179652 | 99.9528891 | 100.068065 | 99.9448372 |
| 99.9212382 | 100.038813 | 99.8983799 | 99.8928132 |
| 100.123096 | 100.148184 | 99.6275529 | 99.9186839 |
| 100.128361 | 100.200466 | 99.5849227 | 99.8277831 |
| 100.24027  | 100.452267 | 99.7600408 | 100.034042 |
| 100.016    | 100.394013 | 99.743741  | 100.034607 |

99.9149208 100.398528 99.9495779 100.268857  
99.6966677 100.206874 100.419973 99.9428581  
99.7530736 99.8317219 100.618495 99.9779178  
99.7827055 99.3868111 100.343907 99.9497852  
99.6646292 99.4990946 100.348713 99.9863999  
99.5746807 99.3836071 100.110068 99.8689217  
99.6304849 99.4794341 100.143294 99.9431408  
99.8833335 99.8598292 100.414957 100.021742  
100.003365 99.9777924 99.9717288 99.9473819  
100.224326 100.28071 99.7713252 100.078856  
100.1428 100.180223 99.8925287 99.9687287  
100.260726 100.45984 99.6166864 100.145865  
100.011036 99.9116747 100.147056 100.233514  
99.6241674 99.3888499 100.091887 100.135686  
99.7467561 99.8260422 99.8501075 100.171453  
100.005471 99.976773 99.8005812 100.101192  
100.26945 100.279545 99.5408297 99.8911168  
100.184917 100.416878 99.728695 99.8390927  
100.244782 100.156776 99.8718405 99.9821588  
100.13543 99.9990549 99.677497 100.043089  
100.01239 100.202505 99.6837662 100.032486  
99.6793699 99.8339064 100.006627 100.124518  
99.5993488 99.6456021 100.121979 99.8861688  
99.5432438 99.3659855 100.008508 99.9445545  
99.9620009 99.8923055 99.8187617 100.068253  
100.017354 99.8550233 99.8005812 99.8942269  
100.113921 99.9703651 99.7961928 99.9767868  
100.092712 100.059493 99.7092607 99.9162806  
100.101887 100.204107 100.076632 100.057509  
99.9520734 99.8711886 100.235869 100.004495  
99.8734061 99.9217235 99.9088284 100.02768  
99.794137 99.7482738 100.123233 99.9171288  
99.9058958 100.139009 99.6676754 99.8150599  
99.8795731 99.9534716 99.9000516 99.7645909  
100.288252 100.156339 99.9286807 99.7022469  
100.542154 100.126193 99.6871097 99.9801797  
100.229891 99.8724993 99.6219106 99.7705284  
99.9802011 100.00823 99.9514586 100.11957  
100.040969 99.7771092 99.6348669 100.008595  
99.9137174 99.6670102 99.9953426 99.9654772  
99.6279278 99.6756026 99.8183438 100.095255  
99.3194254 99.223847 100.398031 100.037717  
99.7180267 99.5767173 100.159594 100.055812  
99.6644788 99.535503 100.240675 100.066981  
99.9212382 99.9428403 100.09753 100.086348  
99.9943402 99.9156068 100.099828 100.121691

|            |            |            |            |
|------------|------------|------------|------------|
| 99.8935618 | 99.9279857 | 99.9731916 | 100.01015  |
| 99.957338  | 99.8100225 | 100.007881 | 99.8183114 |
| 99.9462072 | 100.074784 | 99.8106118 | 99.9357896 |
| 100.03044  | 100.102018 | 100.189268 | 99.9400307 |
| 99.9863682 | 100.230612 | 100.0223   | 100.025277 |
| 99.804967  | 99.9464812 | 100.366685 | 99.8385272 |
| 99.7094531 | 99.7168169 | 100.308173 | 99.9171288 |
| 99.8130894 | 99.6996321 | 100.235451 | 100.035455 |
| 100.093765 | 100.206    | 99.9295166 | 99.9370619 |
| 99.946508  | 100.182116 | 99.8710046 | 99.95544   |
| 99.7867667 | 99.9884237 | 99.9838492 | 100.009302 |
| 100.056612 | 100.053959 | 99.9284717 | 100.139221 |
| 100.409036 | 100.411053 | 100.06911  | 100.070232 |
| 100.386173 | 100.198427 | 99.6935878 | 99.9004472 |
| 100.131218 | 100.191437 | 99.9915811 | 99.8528056 |
| 99.8144431 | 99.9167719 | 100.197    | 100.105999 |
| 99.9683183 | 100.013764 | 100.047376 | 99.8598741 |
| 100.047888 | 100.125465 | 99.8329718 | 99.7949854 |
| 100.316831 | 100.313478 | 99.8158361 | 99.845313  |
| 100.312018 | 100.317701 | 100.08123  | 99.8967716 |
| 100.133023 | 100.508481 | 99.8264937 | 100.008595 |
| 100.108506 | 100.270225 | 99.9577277 | 100.194637 |
| 100.185067 | 100.319012 | 99.9297256 | 99.9936098 |
| 100.376546 | 100.515909 | 99.8302552 | 100.019056 |
| 100.325405 | 100.535715 | 99.6419719 | 99.8460198 |
| 100.31277  | 100.40348  | 99.7897147 | 100.031214 |
| 100.199507 | 100.242409 | 99.8687059 | 100.031921 |
| 100.165045 | 99.6490283 | 99.9299578 | 100.04948  |
| 100.31082  | 99.923041  | 99.8965519 | 100.136769 |
| 100.258804 | 99.8916256 | 100.148504 | 100.019174 |
| 100.176296 | 99.8280674 | 100.461634 | 100.113306 |
| 99.8738218 | 99.7467653 | 100.15756  | 100.056882 |
| 100.137162 | 99.9340946 | 99.9217069 | 100.009258 |
| 100.241357 | 99.8202135 | 100.089742 | 100.017079 |
| 100.21755  | 99.7357117 | 100.073442 | 100.067497 |
| 100.16211  | 99.9102422 | 99.9277441 | 100.147663 |
| 100.22179  | 99.9362763 | 100.286354 | 100.206181 |
| 100.127705 | 100.007397 | 100.32137  | 100.126993 |
| 100.144011 | 100.088118 | 99.7810402 | 100.182578 |
| 100.046012 | 99.8916256 | 99.9237193 | 99.8409654 |
| 100.252445 | 99.655864  | 100.316741 | 99.9635884 |
| 100.267446 | 99.535438  | 100.199418 | 100.044034 |
| 100.274621 | 99.64961   | 100.107653 | 100.008839 |
| 100.462302 | 99.5238027 | 100.065795 | 100.022805 |
| 100.304787 | 99.5902697 | 100.043055 | 100.117077 |
| 100.440778 | 99.8735908 | 99.6331287 | 100.16093  |

|            |            |            |            |
|------------|------------|------------|------------|
| 100.26712  | 99.7556373 | 99.899973  | 100.046547 |
| 100.16048  | 99.5047498 | 100.249124 | 100.005766 |
| 100.031337 | 99.6538278 | 99.8571089 | 100.15702  |
| 100.04911  | 99.7044417 | 100.288366 | 100.164422 |
| 100.169611 | 99.7543283 | 99.9895248 | 100.118613 |
| 100.122976 | 99.5860519 | 100.039231 | 100.083139 |
| 100.107322 | 99.6891703 | 100.018906 | 99.9688955 |
| 100.283752 | 99.729894  | 100.29702  | 99.9077237 |
| 100.071123 | 99.653537  | 100.33284  | 100.088865 |
| 99.7707685 | 100.060484 | 100.205053 | 100.230761 |
| 99.7409287 | 100.173492 | 100.031986 | 100.119172 |
| 99.7952273 | 100.142077 | 99.8208857 | 100.141657 |
| 99.6020024 | 100.158657 | 99.9832864 | 100.156461 |
| 99.7362    | 100.135532 | 99.9482706 | 100.133836 |
| 99.9220873 | 100.100626 | 99.9104375 | 100.08691  |
| 99.7812043 | 100.302499 | 99.818672  | 99.9249021 |
| 99.7963688 | 100.15313  | 99.8575114 | 100.154646 |
| 100.065742 | 99.9668191 | 100.027157 | 99.9600969 |
| 100.125096 | 99.9054426 | 100.013271 | 100.098083 |
| 100.023836 | 100.094663 | 100.101616 | 100.17364  |
| 99.9287727 | 99.8589011 | 100.189356 | 100.188444 |
| 99.9664393 | 99.6277937 | 100.002002 | 100.024341 |
| 99.8995851 | 100.015688 | 99.7671546 | 100.066519 |
| 99.9426327 | 100.247668 | 100.199821 | 99.8973887 |
| 100.045034 | 100.176256 | 100.176678 | 99.8350996 |
| 100.036229 | 100.26163  | 99.9239206 | 99.8876124 |
| 99.841373  | 100.344823 | 100.044262 | 99.8398481 |
| 99.9908982 | 100.332751 | 100.290379 | 99.7570287 |
| 99.8886602 | 100.073283 | 100.060965 | 99.73999   |
| 99.9856803 | 100.047685 | 99.9728219 | 99.6708574 |
| 100.105692 | 99.9839813 | 99.9790603 | 99.692086  |
| 99.846754  | 99.8557014 | 99.718857  | 99.8455742 |
| 99.9607323 | 100.068483 | 99.863951  | 99.9714095 |
| 100.062155 | 100.216834 | 100.169635 | 99.8493451 |
| 99.9010527 | 99.8420298 | 100.023333 | 99.7441798 |
| 100.02938  | 100.142077 | 100.010856 | 99.8596801 |
| 99.9762229 | 100.137713 | 100.241679 | 99.9383096 |
| 100.089549 | 100.028341 | 100.051104 | 100.063586 |
| 99.7738666 | 100.128114 | 100.003008 | 100.036213 |
| 99.9178477 | 100.159821 | 100.323181 | 100.160372 |
| 99.9416544 | 99.8622463 | 100.177684 | 100.103948 |
| 100.038022 | 100.137423 | 99.6941045 | 100.081323 |
| 100.091343 | 100.347732 | 100.132003 | 99.8774171 |
| 100.023021 | 100.132914 | 100.268846 | 99.7753244 |
| 100.002801 | 99.8763542 | 99.8784403 | 99.8614957 |
| 99.9346428 | 99.9964893 | 99.7818451 | 99.8968301 |

|            |            |            |            |
|------------|------------|------------|------------|
| 100.044218 | 100.11677  | 100.301849 | 99.8781154 |
| 99.9070858 | 99.956929  | 99.6800177 | 99.9904035 |
| 99.8676256 | 100.053357 | 99.6613023 | 100.140679 |
| 99.8707237 | 100.013651 | 100.111074 | 100.013308 |
| 99.9502965 | 99.9959075 | 100.029773 | 99.9211312 |
| 99.9044769 | 99.9343855 | 99.8752205 | 99.9480859 |
| 99.8381119 | 99.9409304 | 99.96115   | 99.9986435 |
| 99.971168  | 99.9297314 | 100.213102 | 99.805631  |
| 99.9895937 | 100.014379 | 99.823703  | 99.7802125 |
| 99.9881262 | 99.9636194 | 99.6854511 | 99.8758808 |
| 100.115312 | 99.9534384 | 99.8973569 | 99.9237848 |
| 100.107159 | 99.953293  | 99.7196619 | 99.928254  |
| 99.932523  | 99.9060243 | 99.5791964 | 100.029229 |
| 100.052371 | 100.061793 | 100.14287  | 99.9982245 |
| 99.901868  | 100.109934 | 100.021321 | 100.145009 |
| 99.8790397 | 100.312826 | 99.7613186 | 100.19403  |
| 99.7430485 | 100.248249 | 100.23383  | 100.040263 |
| 99.8469171 | 100.160112 | 100.153535 | 100.00814  |
| 99.9277943 | 100.230069 | 99.8887036 | 100.010096 |
| 99.6629865 | 100.126369 | 99.8661647 | 99.9575829 |
| 99.84121   | 99.9848539 | 100.092761 | 100.010096 |
| 99.7531581 | 99.9652192 | 99.8699882 | 100.019174 |
| 99.8511566 | 100.331588 | 99.8039815 | 99.9321645 |
| 99.8160989 | 100.42118  | 99.9321714 | 99.8352393 |
| 99.8553961 | 100.176256 | 99.9013817 | 99.804374  |
| 99.9339906 | 100.191091 | 99.7939195 | 99.8580041 |
| 99.7826718 | 100.070956 | 99.7462256 | 99.9582813 |
| 99.8973023 | 100.020633 | 100.249929 | 100.026017 |
| 99.9946485 | 99.9445665 | 99.925933  | 100.073223 |
| 100.126074 | 100.304099 | 99.8271241 | 100.104926 |
| 100.110094 | 100.201999 | 99.956119  | 100.074619 |
| 100.191298 | 99.85032   | 99.925128  | 100.126294 |
| 100.220648 | 99.7649456 | 99.990531  | 100.040402 |
| 100.150207 | 100.173347 | 99.7921084 | 100.196125 |
| 99.9703527 | 100.271229 | 100.181709 | 100.062748 |
| 100.093697 | 100.180867 | 100.002909 | 100.112821 |
| 99.9401309 | 100.272752 | 99.6913263 | 99.8582656 |
| 100.01398  | 100.237367 | 99.974327  | 99.9770953 |
| 100.103804 | 100.229067 | 99.9354798 | 100.047053 |
| 100.019033 | 100.413711 | 99.7182979 | 99.9681586 |
| 99.8682386 | 100.397256 | 100.000695 | 99.8938726 |
| 100.000449 | 100.283674 | 100.124885 | 99.8831207 |
| 100.012675 | 100.459872 | 99.6685815 | 99.8518424 |
| 99.9275783 | 100.296051 | 99.794382  | 99.9064398 |
| 99.7691217 | 99.9831177 | 100.118041 | 99.862315  |
| 99.8144416 | 100.01064  | 100.013979 | 100.026945 |



99.9678445 100.251055 99.8267882 100.182639  
100.11114 100.151598 100.324153 100.151221  
100.044954 100.169072 100.05806 100.008094  
99.901984 100.339737 99.8954249 99.8384374  
99.9463257 100.424487 100.043568 99.6602627  
99.9523575 100.237076 100.167154 99.6784153  
99.8780198 100.218 99.7579502 99.8711121  
99.917471 99.9957865 99.9175658 99.814839  
100.010882 99.7504197 99.7706309 99.7623361  
99.833026 99.7799802 99.8869711 99.9889643  
99.7229867 99.7780871 100.154473 100.155829  
99.917797 99.7566812 99.7780783 100.204282  
99.9730612 99.7447405 99.7670078 100.129158  
99.8649782 99.8497313 99.7873372 100.287225  
99.8555229 99.9168614 99.8891852 100.140888  
100.045769 100.117378 100.098517 99.8010151  
99.9533356 99.9893793 100.273028 100.059201  
100.049518 99.9037557 99.8650315 99.9053227  
100.011534 99.6840177 99.8445009 99.7282651  
100.195422 99.774301 100.028471 99.767363  
100.353227 99.9772929 99.6261113 99.7254724  
100.372137 100.052286 99.7655989 99.7432061  
100.253784 99.8916694 99.6713995 99.7270084  
99.8385687 99.7255189 100.043165 99.8813054  
99.7973244 99.9321513 100.303824 100.098857  
99.9774628 100.137036 99.7859282 100.224948  
99.8379166 99.9675365 99.9727167 100.075119  
99.8152567 100.056509 99.6315459 100.175796  
99.8873121 100.057237 99.8092768 100.154432  
99.9988185 99.8747777 100.342872 100.076935  
100.084731 100.117378 99.9099171 99.984496  
100.11489 100.093351 100.09107 99.8551936  
99.9285564 99.8907957 99.8946198 99.899458  
100.132985 100.287606 99.5971269 100.075817  
99.994743 100.018212 99.916962 100.042026  
100.09924 99.9925829 99.9211889 100.15918  
99.8739443 99.8877377 99.9817744 100.084335  
99.9955581 99.9129297 99.9354798 100.283595  
100.117498 99.8682248 100.324153 100.259857  
100.017403 99.8532262 100.032497 100.301887  
99.925133 99.8463821 99.7015916 100.20889  
99.8449265 99.8877377 100.236193 100.152058  
100.112933 99.9541396 99.9853974 100.049147  
100.093534 99.7387702 99.8088742 100.010747  
99.9887112 99.9531203 99.8791212 99.8687383  
100.030608 100.199652 100.34891 99.8931745

|            |            |            |            |
|------------|------------|------------|------------|
| 100.067124 | 100.352114 | 100.054839 | 100.049008 |
| 100.053105 | 100.478365 | 99.8078678 | 100.019963 |
| 100.124834 | 100.273044 | 100.093284 | 99.9254302 |
| 100.034194 | 100.03787  | 100.338041 | 99.9754197 |
| 100.065494 | 99.9866125 | 100.113211 | 99.9216601 |
| 100.039737 | 99.9638961 | 99.9322593 | 99.8969446 |
| 100.101033 | 99.8816217 | 100.225727 | 99.9110478 |
| 100.064842 | 99.7217328 | 100.143403 | 100.05557  |
| 100.057506 | 100.084031 | 99.724135  | 100.153874 |
| 99.8666084 | 99.9210843 | 99.6033666 | 100.068556 |
| 99.9768107 | 99.8543911 | 100.110191 | 100.191994 |
| 100.002405 | 99.8931256 | 100.210228 | 100.090898 |
| 99.9089939 | 99.8478383 | 99.8783161 | 100.162671 |
| 99.9657252 | 99.9270546 | 99.7446657 | 100.320598 |
| 100.060441 | 100.067285 | 100.236797 | 100.122875 |
| 100.056202 | 99.8519156 | 100.148032 | 100.194647 |
| 100.229004 | 100.309011 | 99.8519483 | 100.259298 |
| 99.9800711 | 100.170965 | 100.061079 | 100.056967 |
| 99.9528466 | 100.123057 | 99.9531925 | 100.027504 |
| 99.9208944 | 100.00365  | 99.6794507 | 99.9044849 |
| 100.056691 | 99.9419077 | 100.017401 | 99.7411116 |
| 100.014958 | 99.705278  | 100.326367 | 99.6301015 |
| 100.381429 | 99.7984737 | 100.817895 | 99.636385  |
| 100.336761 | 99.7012007 | 100.474107 | 99.6481144 |
| 100.782298 | 100.356629 | 99.7203107 | 99.8049249 |
| 100.355346 | 100.085196 | 100.005123 | 99.9763971 |
| 100.099892 | 99.9244335 | 100.125288 | 99.8892647 |
| 99.9590414 | 100.239988 | 99.7808962 | 99.7127656 |
| 99.6647881 | 99.8364801 | 99.7559374 | 99.7588452 |
| 99.8455786 | 100.084905 | 99.6242998 | 99.9241735 |
| 100.021641 | 100.249162 | 100.008343 | 99.8017133 |
| 100.012675 | 100.207661 | 100.281884 | 99.9645281 |
| 99.7438534 | 99.8941449 | 100.222909 | 100.221038 |
| 99.9044293 | 99.8864271 | 100.062085 | 100.342521 |
| 100.003383 | 100.166014 | 100.365214 | 100.152617 |
| 99.8545448 | 99.9873406 | 100.099926 | 100.202048 |
| 99.7877061 | 99.8290535 | 100.093888 | 100.225646 |
| 99.8604136 | 99.847547  | 100.26719  | 100.04412  |
| 99.9067116 | 99.989088  | 100.082213 | 100.025409 |
| 99.8348192 | 99.9172982 | 100.039139 | 100.03672  |
| 99.8842146 | 99.8669143 | 100.451564 | 100.089222 |
| 99.9955581 | 99.6968321 | 100.096907 | 100.185711 |
| 100.125551 | 99.885557  | 100.02913  | 100.298938 |
| 99.8996016 | 99.895594  | 100.38534  | 100.045831 |
| 99.9196679 | 99.803661  | 100.16364  | 100.095838 |
| 99.9777459 | 99.6912178 | 100.048259 | 100.098492 |

|            |            |            |            |
|------------|------------|------------|------------|
| 100.095044 | 99.6229954 | 100.058529 | 100.168334 |
| 100.110542 | 99.7911512 | 100.470113 | 100.037869 |
| 100.147412 | 99.8798839 | 100.282443 | 99.9617413 |
| 99.9524591 | 99.6919451 | 99.9675128 | 99.9500079 |
| 100.006132 | 99.6619796 | 100.03356  | 100.058123 |
| 100.029951 | 99.670562  | 100.609254 | 99.9838114 |
| 100.125878 | 99.6429239 | 100.066382 | 100.041361 |
| 100.172699 | 99.823735  | 100.068395 | 99.856699  |
| 100.090802 | 99.8461364 | 100.049266 | 99.9180202 |
| 100.037782 | 99.660525  | 99.9516052 | 99.8881279 |
| 100.061437 | 99.4903327 | 100.480987 | 99.9477729 |
| 99.9540905 | 99.542845  | 100.645298 | 99.8734611 |
| 99.8387502 | 99.706055  | 100.165049 | 99.8965089 |
| 99.7377662 | 99.8775565 | 99.9584515 | 99.8709467 |
| 99.4571644 | 99.8692651 | 99.5788836 | 99.9146678 |
| 99.8888343 | 100.254161 | 99.6761416 | 100.123775 |
| 99.8131371 | 100.139682 | 99.6155316 | 100.273656 |
| 99.6625584 | 100.070005 | 100.14149  | 100.123495 |
| 99.6033384 | 99.9860723 | 100.023492 | 100.1126   |
| 99.8110163 | 99.9188681 | 100.50072  | 100.088295 |
| 99.8155842 | 100.00411  | 99.7621233 | 100.030466 |
| 99.8529434 | 100.074369 | 99.9840246 | 99.9856273 |
| 99.8772513 | 99.917559  | 99.9369058 | 100.140816 |
| 99.7917657 | 99.6640161 | 99.8128666 | 100.17881  |
| 99.7506543 | 99.8721743 | 99.938718  | 100.104638 |
| 99.8599584 | 99.8587917 | 100.393595 | 100.036472 |
| 99.9780722 | 99.8320264 | 100.346275 | 100.088574 |
| 99.8584902 | 99.859519  | 100.03658  | 100.129781 |
| 99.9274986 | 100.016329 | 99.7383626 | 100.035355 |
| 99.8382607 | 100.017783 | 100.143101 | 100.027951 |
| 99.7896449 | 99.9598888 | 100.1725   | 100.073069 |
| 99.828146  | 100.06055  | 99.9185818 | 100.242366 |
| 99.92913   | 99.9729805 | 100.103634 | 100.080054 |
| 99.9498489 | 99.7558036 | 100.037386 | 100.042758 |
| 99.9379396 | 99.9009761 | 100.01     | 99.8931565 |
| 99.8968282 | 99.877702  | 100.134845 | 99.9329664 |
| 99.9800299 | 99.7834416 | 100.080276 | 99.9114551 |
| 99.7824667 | 99.9219229 | 99.7007078 | 99.9444205 |
| 99.8410341 | 99.8758109 | 99.9946968 | 100.040942 |
| 99.8255358 | 99.8887572 | 100.175721 | 99.8828199 |
| 99.9860661 | 100.128917 | 100.133637 | 99.8583752 |
| 100.059806 | 100.503049 | 99.7295026 | 100.001132 |
| 100.066658 | 100.449373 | 100.200288 | 99.8420322 |
| 100.149696 | 100.302746 | 100.231499 | 99.6639351 |
| 100.030767 | 100.293728 | 99.9121382 | 99.7548694 |
| 100.085256 | 100.375478 | 99.8563609 | 99.822197  |

|            |            |            |            |
|------------|------------|------------|------------|
| 100.219683 | 100.179102 | 100.199684 | 99.8284828 |
| 100.122778 | 99.8672286 | 100.158002 | 99.8854739 |
| 100.272541 | 100.178666 | 99.9652979 | 99.8913406 |
| 100.164379 | 99.9229411 | 99.9207968 | 99.9576905 |
| 100.022936 | 99.6401601 | 100.231096 | 99.8818421 |
| 100.121473 | 99.8601009 | 99.9872463 | 99.9276584 |
| 99.9589847 | 100.143464 | 99.6870152 | 99.8680134 |
| 100.083135 | 99.9366147 | 99.7993753 | 99.977805  |
| 100.020652 | 99.8971941 | 100.070409 | 99.8579561 |
| 100.157853 | 99.871447  | 100.03658  | 99.8772325 |
| 100.175472 | 99.917268  | 100.031345 | 99.9145281 |
| 99.9235833 | 99.8606827 | 99.9624788 | 100.052396 |
| 99.9004173 | 99.8371176 | 100.112494 | 100.044993 |
| 100.107769 | 99.8782838 | 100.273382 | 99.8400766 |
| 100.060458 | 99.8887572 | 100.360371 | 99.8242923 |
| 100.121962 | 100.379406 | 99.7566865 | 99.8562799 |
| 100.048549 | 100.575345 | 99.8485077 | 99.7407613 |
| 99.9876975 | 100.378242 | 100.231096 | 99.8212193 |
| 100.023099 | 100.080478 | 100.006174 | 99.9099186 |
| 100.293423 | 100.136191 | 99.6161357 | 100.109527 |
| 100.221315 | 99.8999579 | 100.12075  | 99.8357464 |
| 100.195702 | 99.9562522 | 100.069201 | 99.8734611 |
| 100.16601  | 100.190448 | 99.8110544 | 99.873042  |
| 100.072367 | 100.16281  | 100.101217 | 99.8026413 |
| 100.107606 | 100.1471   | 100.008188 | 99.864661  |
| 100.055564 | 100.387842 | 99.7377585 | 100.009094 |
| 99.9527854 | 100.244852 | 100.073027 | 99.888966  |
| 100.150512 | 100.090515 | 100.135852 | 99.9391125 |
| 99.9950388 | 100.318165 | 99.6783566 | 99.8478989 |
| 100.072694 | 100.582182 | 99.7975631 | 99.8682927 |
| 100.078404 | 100.345949 | 100.208342 | 99.9166234 |
| 99.8764356 | 100.262307 | 99.8768998 | 99.9495888 |
| 99.9653472 | 100.122372 | 99.7723928 | 100.008954 |
| 100.091944 | 99.9485427 | 100.060341 | 99.9748716 |
| 100.144639 | 99.9227956 | 99.8662276 | 99.9666302 |
| 100.19146  | 99.9795264 | 99.71581   | 99.945957  |
| 100.276293 | 99.7768958 | 100.0247   | 99.9421856 |
| 100.362431 | 99.8848297 | 99.9491889 | 99.9365982 |
| 99.9188522 | 99.9374874 | 99.8462928 | 99.9793415 |
| 99.8508226 | 100.097934 | 100.096989 | 100.186493 |
| 99.9978122 | 100.039166 | 100.25244  | 100.199064 |
| 99.8961756 | 100.315402 | 99.639091  | 100.289999 |
| 99.9664892 | 100.305801 | 99.6910424 | 100.409847 |
| 100.05589  | 100.097206 | 100.025908 | 100.350202 |
| 100.031419 | 100.063604 | 99.885357  | 100.384844 |
| 99.9152631 | 99.9645437 | 100.002751 | 100.433733 |

99.9299457 99.8107888 100.240359 100.32017  
100.145291 100.028693 99.5810986 100.445327  
100.22784 100.032475 99.8392451 100.308996  
99.9865555 99.7427118 99.8775039 100.222531  
100.233713 100.011819 99.4620935 100.329529  
100.213095 100.097557 99.6850143 100.234546  
100.007901 100.043999 99.6630834 100.178266  
99.8509497 99.8783761 99.484215 100.119472  
99.8656181 99.9041365 99.8011078 100.189857  
99.9607994 99.9881123 100.168301 100.003979  
99.8638253 99.9013712 99.6139901 100.127572  
99.9973073 99.8884183 99.6455788 100.034842  
100.349348 99.8063345 99.9381262 99.7227171  
100.307299 99.6846642 99.8926546 99.7676854  
100.423016 99.9048642 99.8713272 99.9023111  
100.514286 100.061755 99.7025189 100.021575  
100.38553 99.789452 99.5984976 99.9594293  
100.522761 100.00907 99.641756 99.9740928  
100.517708 100.205693 99.5339118 100.049925  
100.365646 100.146167 99.7226391 99.8732632  
99.9845948 99.8785217 99.9540211 99.8778718  
99.9673187 99.7926539 99.9381262 99.9359675  
99.9570508 99.9836006 99.7578494 100.016687  
99.3763468 99.7911985 100.394452 99.9921081  
99.9560729 100.14966 100.180172 99.9394589  
100.254819 100.102215 99.7598614 100.137208  
100.531725 100.157665 99.7178102 100.021854  
100.264109 99.9996098 99.6721374 99.8750787  
99.8310659 99.9684646 99.4182208 99.8634875  
99.6491783 100.05637 99.6914528 100.146285  
99.7468043 100.086933 99.6045336 100.12031  
99.884361 100.321832 99.8254532 99.8005039  
100.104223 100.129576 99.8258556 100.022832  
100.222222 100.097703 99.9771593 100.169887  
100.049787 100.012272 100.313569 100.127432  
99.9220098 100.031483 99.8890329 100.225748  
99.7750002 99.9274227 99.7419544 100.191533  
99.8082485 99.8959863 99.7968825 100.244601  
99.8648031 100.018093 100.229466 99.9739532  
99.9417305 100.014891 100.109751 100.014732  
99.9813351 100.213406 99.754429 100.179942  
99.9744899 100.068886 100.13973 100.131482  
100.025503 99.9117045 100.658831 100.073666  
99.9834539 99.8090997 100.222625 100.28133  
100.158659 100.181388 100.087217 100.287195  
100.003175 100.21981 100.299283 100.236501

99.9453161 99.9518732 99.9964747 100.260941  
99.8807754 100.114294 99.785414 100.196141  
99.8828941 100.125355 99.7650927 100.264013  
99.8237317 100.115168 99.9453694 99.9859634  
99.9018 100.041671 100.085205 100.001744  
99.8939769 99.8952586 100.026856 99.9809359  
100.035119 100.14282 99.8308856 100.095033  
100.093304 100.07398 100.016796 100.139163  
100.097541 99.8112828 100.52141 100.121148  
100.169905 99.8961318 100.047781 100.151732  
100.017843 99.8085176 100.071322 100.225888  
99.8783306 99.9028266 99.5982964 100.045316  
99.9638961 100.097121 99.7785732 99.7229964  
99.919565 99.900498 100.032087 99.7498098  
99.9275511 99.7942548 99.761471 99.7935213  
100.025177 99.8318038 99.6568461 100.096848  
100.021918 99.7977477 99.9127748 100.003141  
100.229393 99.870226 100.120817 99.9228401  
100.25547 100.035558 99.7357172 100.003839  
99.8639882 100.083295 99.9017087 99.9062214  
99.6010986 99.7094058 100.775528 99.8059504  
99.8652921 99.7245418 100.767681 99.6005205  
100.368417 100.158975 100.270713 99.741291  
100.232327 100.063647 100.365881 99.5545746  
100.272584 100.075144 100.013979 99.7986884  
100.020288 100.212824 99.6703266 99.744084  
99.9184242 100.179205 99.5846147 99.9201867  
99.937819 100.152716 99.6421584 100.065286  
99.8465492 100.136998 100.167697 99.8942112  
99.8983774 100.163777 100.423022 99.9531449  
100.011487 100.074853 100.422016 100.005654  
99.7102964 99.9360094 100.24355 100.153268  
99.7999364 99.8974417 100.029673 100.320852  
99.9332555 99.9894221 100.26186 100.277839  
99.9500426 100.01038 100.012772 100.003979  
99.9389599 100.100905 100.221619 99.7780198  
99.8087374 100.112693 100.13631 99.8087435  
99.929018 100.014309 99.9071411 99.8010625  
99.8812643 99.8377708 100.151802 99.9041266  
99.8936509 99.8919112 99.9514055 100.07185  
99.8543723 100.016783 99.9532163 100.062773  
99.9585177 100.128994 99.8467806 100.151871  
99.9640591 100.04691 100.370509 100.056069  
99.8426376 99.8449022 100.480365 100.104808  
99.9461311 100.045163 100.115787 100.116958  
99.8185163 100.074999 99.9872194 100.102434

99.7823344 99.7917806 100.114781 100.14852  
100.072279 100.111384 100.010961 100.26513  
99.9133717 99.9617698 100.295662 100.058304  
99.8977255 99.7655837 100.445959 100.018363  
99.8154197 99.9709387 100.047781 100.13637  
99.8154197 99.9991732 99.8369217 100.050064  
99.9929068 100.01853 100.271518 99.8430981  
100.01442 99.8559632 100.09285 99.7236947  
100.006108 99.9448873 99.9946639 99.8863906  
99.9883433 100.165961 99.7978885 99.8933733  
99.9844318 100.066994 99.9735377 99.8080452  
100.065434 100.116041 100.154619 99.7630769  
100.021266 100.023769 100.091442 99.7465978  
99.8213855 100.208079 99.9292943 99.9056596  
100.003333 100.176854 100.027231 100.193931  
99.6394378 99.8997722 100.464877 100.150035  
99.4753479 100.048174 99.9695897 99.9155289  
99.5794625 100.008896 99.9813315 99.9195061  
99.4911841 99.778816 100.202823 100.093323  
99.4460342 99.8887612 100.653278 100.164913  
99.5100528 99.8412662 100.567083 100.191722  
99.5675011 99.8588509 101.010067 100.214554  
99.4573216 99.4719884 100.457939 100.307649  
99.4556369 99.7697772 100.242585 100.211608  
99.7416991 99.6501358 99.9252914 100.099068  
99.6461766 99.5257284 99.6971283 100.381301  
99.7219881 99.4599913 100.564148 100.935896  
99.3385502 99.0165949 99.8695182 100.083454  
99.4323881 99.5827553 100.3576 99.7022344  
99.3082256 99.1365651 100.271405 99.6072241  
99.7231674 99.7447971 99.8996731 100.085222  
99.6901473 99.832063 100.401899 99.7559999  
99.5103897 99.7355939 100.645273 99.9544169  
99.7794364 99.8705192 99.9052771 100.194521  
99.6402802 99.7587662 100.112625 100.078446  
99.6608335 99.8746278 100.070996 100.37202  
99.9100007 100.058527 99.7219461 100.199382  
99.8042015 99.9498967 99.7334209 100.172278  
99.9479065 100.123936 99.8962039 100.093323  
99.9408308 100.351221 99.982132 100.10172  
99.7191241 100.048338 100.294355 99.9647281  
100.204655 100.206271 100.091277 99.85867  
100.038712 99.967317 100.572154 99.8585227  
100.206003 100.107008 100.209495 99.80078  
100.264125 100.049324 99.907412 99.6036888  
100.138952 100.104543 99.7953318 99.6107593

99.9721662 100.18918 99.7761181 99.9987551  
100.210551 100.448677 99.8414982 99.8352489  
100.235316 100.417123 99.9031422 99.8199294  
100.085378 100.231416 99.9258251 99.7646908  
99.9689653 100.05294 100.297024 99.8488007  
100.131033 100.277596 100.260464 100.029247  
100.059434 100.153682 100.313035 100.228989  
99.9062944 99.9594286 100.365606 100.072701  
99.8232387 99.8442244 100.075532 99.9050704  
99.9388091 99.9867095 99.7222129 99.8896036  
100.018495 100.03404 99.6781814 100.126025  
100.000469 99.9954196 99.547955 99.9134667  
100.26463 100.314737 99.7112718 99.9109625  
100.253174 100.368313 99.7094038 99.7393547  
100.14569 100.198876 100.063257 99.697668  
100.272043 100.183592 99.802537 99.52061  
100.309949 100.329693 99.95598 99.7733817  
100.19421 100.15286 100.438191 99.664083  
100.04663 100.038806 100.842747 99.8012219  
100.064151 100.154339 100.277276 99.9280497  
100.199264 100.201341 99.7531684 100.033519  
100.312139 100.394608 99.4796395 99.900504  
100.12918 100.255903 100.112092 99.7425954  
100.13255 100.199369 99.7494324 100.059002  
99.9691337 100.011525 99.6063968 100.184651  
100.041576 100.038806 99.845501 100.31855  
100.017485 99.9758628 99.9453057 100.186714  
100.043934 100.111774 99.6576334 100.202328  
99.9733455 99.9707682 99.7102043 100.230904  
99.9689653 100.06165 99.4887127 100.197025  
100.044945 100.138726 99.6069305 100.258008  
99.9666067 99.9709326 99.6829849 100.215879  
100.159842 100.155654 99.7470307 100.312657  
100.333366 100.23651 99.9495754 100.400008  
99.8931537 99.9844087 100.172135 100.255946  
99.8699049 99.9416796 99.8254867 100.340203  
99.7937564 99.778816 99.9413028 100.370695  
100.001648 99.8867891 99.9255583 100.498701  
100.163885 100.106351 100.033902 100.209987  
100.168602 100.028781 99.9234234 100.010687  
100.039386 100.078084 100.665287 99.8006327  
100.182417 100.023358 100.499302 99.7004668  
100.298661 100.113746 99.8884651 99.6676182  
100.257049 100.005773 99.7219461 99.6886825  
100.059771 99.9717543 99.8345599 99.9010933  
100.092791 100.039299 99.8054724 99.7210892



|            |            |            |            |
|------------|------------|------------|------------|
| 100.097171 | 100.018592 | 99.8729873 | 99.6992883 |
| 100.155125 | 100.094683 | 99.9538451 | 99.7803049 |
| 100.160179 | 100.224678 | 99.8975382 | 99.8966742 |
| 99.9276901 | 99.9107832 | 99.6784483 | 99.8706016 |
| 99.9435263 | 99.8667393 | 100.10035  | 100.098774 |
| 100.16776  | 100.12147  | 100.04004  | 100.12028  |
| 100.210046 | 100.018921 | 100.066993 | 100.285112 |
| 100.190166 | 100.038642 | 100.457405 | 100.340203 |
| 100.102562 | 99.9066746 | 100.728532 | 100.483381 |
| 100.277434 | 100.106844 | 100.140378 | 100.134568 |
| 100.255364 | 100.212023 | 99.926092  | 100.066956 |
| 100.299841 | 100.161406 | 99.7200781 | 99.6584855 |
| 100.183259 | 99.9337911 | 99.7230135 | 99.7593879 |
| 100.05438  | 99.9134126 | 99.4980527 | 99.9497032 |
| 100.081335 | 99.8789007 | 99.7078026 | 100.16668  |
| 100.131876 | 100.098791 | 99.6456248 | 99.7110726 |
| 100.086726 | 99.9395431 | 99.7937307 | 99.7031182 |
| 100.177194 | 99.9993638 | 99.8695182 | 99.7561472 |
| 100.14131  | 99.9664953 | 99.903676  | 99.9050704 |
| 99.8913006 | 99.6501358 | 99.8265542 | 99.6766037 |
| 100.093465 | 99.8277901 | 100.168399 | 99.6223962 |
| 100.514166 | 100.181128 | 100.280959 | 99.7186905 |
| 100.444048 | 100.154427 | 100.244378 | 99.8308913 |
| 100.373929 | 100.04136  | 100.519673 | 99.8942067 |
| 100.404511 | 100.150307 | 99.9533294 | 99.9997815 |
| 100.418704 | 100.243596 | 99.946654  | 99.8311858 |
| 100.443879 | 100.228102 | 99.8321036 | 99.9906523 |
| 100.475981 | 100.28579  | 99.7941872 | 99.7968777 |
| 100.503184 | 100.394078 | 99.5843117 | 99.749612  |
| 100.244506 | 100.008395 | 99.7613441 | 99.9996343 |
| 100.500649 | 100.24376  | 99.6003328 | 99.8158723 |
| 100.414818 | 100.165965 | 99.9325021 | 99.6941006 |
| 100.198548 | 99.8374754 | 99.7720248 | 99.6117905 |
| 100.01303  | 99.6614461 | 100.377887 | 99.8276519 |
| 100.107986 | 99.7735247 | 99.9071355 | 99.8784515 |
| 100.375112 | 100.066412 | 99.931167  | 100.189875 |
| 100.300431 | 99.9439501 | 99.9341042 | 100.185016 |
| 100.260557 | 99.7145186 | 100.689763 | 99.9953642 |
| 100.239775 | 99.9174138 | 100.105796 | 99.6023668 |
| 100.382884 | 100.136462 | 99.7765641 | 99.4696989 |
| 100.469054 | 100.104321 | 99.790716  | 99.2843173 |
| 100.310231 | 100.099212 | 99.8654808 | 99.5478861 |
| 100.482402 | 100.093278 | 100.932481 | 99.9719522 |
| 99.9462906 | 99.8872515 | 101.167189 | 99.6580255 |
| 100.440838 | 100.504508 | 100.587228 | 99.8622545 |
| 100.410594 | 100.627794 | 99.8969888 | 99.8568065 |

|            |            |            |            |
|------------|------------|------------|------------|
| 100.034657 | 100.130363 | 100.673475 | 99.7555018 |
| 99.7227561 | 99.9965281 | 100.7178   | 99.7923131 |
| 99.918919  | 100.267165 | 100.974136 | 100.043366 |
| 99.8028433 | 100.305568 | 101.256373 | 100.170586 |
| 99.8288632 | 100.27623  | 100.125021 | 100.282787 |
| 99.5166245 | 100.005099 | 100.107398 | 99.9402945 |
| 99.3434401 | 99.5706294 | 100.407259 | 100.120817 |
| 99.484522  | 99.5439284 | 99.6230292 | 100.1351   |
| 99.3542536 | 99.3677342 | 100.205661 | 99.924392  |
| 99.5105419 | 99.4944819 | 100.426751 | 99.8964154 |
| 100.177259 | 100.041854 | 99.3309125 | 100.134658 |
| 100.261064 | 100.360289 | 99.7426529 | 99.9429449 |
| 99.7908471 | 100.317106 | 100.252923 | 100.046016 |
| 99.8368043 | 99.8546168 | 100.412065 | 100.28205  |
| 100.466351 | 100.348257 | 101.158111 | 100.037329 |
| 99.8342699 | 100.337873 | 100.605118 | 99.4028496 |
| 99.795578  | 100.108442 | 100.468673 | 99.5527452 |
| 100.28928  | 100.236014 | 99.8035328 | 99.7797972 |
| 100.26326  | 100.144208 | 99.370431  | 100.002579 |
| 100.151746 | 100.050919 | 99.9068684 | 100.165138 |
| 100.075714 | 99.8346734 | 99.5931233 | 100.061477 |
| 100.159181 | 100.066083 | 100.137304 | 100.038801 |
| 100.329831 | 100.351224 | 99.5471963 | 99.8984768 |
| 100.322903 | 100.184425 | 99.4406565 | 100.022752 |
| 99.9751828 | 99.9302699 | 100.305792 | 100.154978 |
| 99.9266912 | 99.81473   | 100.285232 | 100.212404 |
| 99.9897134 | 99.824949  | 99.7210245 | 100.332703 |
| 99.6999464 | 99.6197462 | 99.8710881 | 100.049256 |
| 99.816867  | 99.4873946 | 99.9076695 | 100.055882 |
| 100.254136 | 99.8338493 | 99.3504047 | 100.338004 |
| 99.8656965 | 99.6871582 | 99.6016678 | 100.298689 |
| 99.6991016 | 99.4964598 | 100.036906 | 100.375404 |
| 99.8915474 | 99.8592318 | 99.5375837 | 100.328874 |
| 100.119982 | 99.980046  | 99.2366554 | 100.625721 |
| 99.6857538 | 99.5055249 | 99.6235632 | 100.499384 |
| 99.6830504 | 99.5831559 | 100.283897 | 100.429296 |
| 99.9393632 | 99.8656599 | 100.231828 | 100.430768 |
| 99.8329182 | 99.8236304 | 100.233163 | 100.425615 |
| 99.6065114 | 99.4776701 | 100.137037 | 100.088129 |
| 100.030433 | 99.8399477 | 99.6644169 | 100.144671 |
| 100.155801 | 100.406604 | 99.323169  | 100.321218 |
| 99.6644648 | 99.7811065 | 100.100456 | 100.301192 |
| 99.7355971 | 99.8188506 | 100.383761 | 100.17088  |
| 100.130626 | 100.285131 | 99.5204946 | 100.325193 |
| 99.8315665 | 99.8732417 | 99.930633  | 100.238319 |
| 100.083824 | 100.041689 | 100.356525 | 100.09873  |

|            |            |            |            |
|------------|------------|------------|------------|
| 100.233354 | 100.259254 | 99.7122129 | 100.10624  |
| 100.184525 | 100.171404 | 99.3912583 | 100.111835 |
| 99.8454213 | 99.8628579 | 100.011806 | 99.9670931 |
| 99.8670482 | 99.7084202 | 99.7629462 | 99.6025141 |
| 99.8670482 | 99.7184743 | 99.7335743 | 99.610907  |
| 99.7722615 | 99.6016159 | 100.043047 | 99.6455097 |
| 99.7163356 | 99.5871116 | 100.122885 | 99.4705824 |
| 99.6543271 | 100.116353 | 100.77681  | 99.946626  |
| 99.8572485 | 100.371827 | 100.683087 | 100.129652 |
| 99.5904601 | 99.9134581 | 100.415002 | 99.6754004 |
| 100.162729 | 100.48374  | 99.3776405 | 99.56585   |
| 99.9033747 | 100.124924 | 99.7501294 | 99.8657884 |
| 99.7932125 | 100.052732 | 100.411531 | 99.8303023 |
| 99.9452768 | 100.115364 | 99.5864479 | 99.7116227 |
| 100.082811 | 100.275736 | 99.868685  | 99.7494647 |
| 99.9211155 | 100.052897 | 100.468673 | 99.9207109 |
| 100.053411 | 100.27178  | 99.8911144 | 100.053379 |
| 100.138399 | 100.39655  | 99.5138192 | 100.175592 |
| 99.667506  | 100.025207 | 99.9122088 | 100.110215 |
| 99.7489449 | 99.9574654 | 99.9821673 | 100.244503 |
| 100.02114  | 100.111244 | 99.1880583 | 100.192673 |
| 99.9680865 | 100.130858 | 99.2753729 | 100.078852 |
| 99.8439006 | 100.011197 | 100.177624 | 100.177654 |
| 99.8202462 | 99.8109391 | 99.4080804 | 99.9582584 |
| 100.104269 | 100.118002 | 99.4307769 | 100.020985 |
| 99.9092883 | 99.928292  | 100.271347 | 100.047342 |
| 100.135695 | 100.056523 | 100.006466 | 100.056324 |
| 100.225413 | 100.270461 | 99.4905887 | 100.302076 |
| 99.3294047 | 100.01716  | 100.789027 | 100.146237 |
| 99.59625   | 100.226621 | 100.871497 | 99.6117221 |
| 99.8521591 | 100.389114 | 100.560567 | 99.7166793 |
| 100.112947 | 101.108138 | 100.152755 | 99.9538648 |
| 99.7769511 | 100.718221 | 99.9899508 | 99.8925415 |
| 99.3292364 | 100.217228 | 100.406036 | 100.088452 |
| 99.3985556 | 100.085552 | 99.6782203 | 100.246919 |
| 99.3522867 | 99.8055564 | 100.122063 | 100.197094 |
| 99.267152  | 99.6186728 | 100.707091 | 99.6907348 |
| 99.3151034 | 99.6381193 | 100.236826 | 99.557622  |
| 99.6753278 | 100.201901 | 99.664075  | 99.5110399 |
| 99.4318693 | 100.14109  | 100.128735 | 99.8831071 |
| 99.6408364 | 100.23206  | 99.8861296 | 99.7271455 |
| 99.7289997 | 100.016666 | 99.8639775 | 99.6955994 |
| 100.229209 | 100.341982 | 99.4492265 | 99.9302789 |
| 100.075932 | 100.063304 | 99.5658586 | 100.127958 |
| 99.9552967 | 100.084893 | 99.8871972 | 99.9537174 |
| 100.441373 | 100.484204 | 99.6856933 | 99.8434534 |

|            |            |            |            |
|------------|------------|------------|------------|
| 100.150299 | 100.155757 | 99.7083792 | 99.7872895 |
| 100.214571 | 100.225303 | 100.122596 | 99.8459594 |
| 100.864859 | 101.105007 | 99.9536534 | 100.085503 |
| 100.052882 | 100.191189 | 100.024113 | 100.015041 |
| 100.16174  | 100.134498 | 100.142346 | 99.9770084 |
| 100.230723 | 100.185092 | 100.147951 | 99.9457571 |
| 100.117995 | 100.173391 | 100.314492 | 100.061033 |
| 100.161572 | 100.162679 | 100.292874 | 99.8539196 |
| 100.162918 | 100.133179 | 100.218411 | 100.249131 |
| 100.162918 | 100.139936 | 99.9307007 | 100.363522 |
| 100.15602  | 100.159877 | 100.166367 | 100.339936 |
| 100.110255 | 100.154274 | 99.6176357 | 100.026539 |
| 100.142223 | 100.102691 | 99.47298   | 100.004869 |
| 100.088383 | 100.185916 | 99.3080404 | 99.8686608 |
| 99.960849  | 100.120819 | 99.8236767 | 99.6490173 |
| 100.237116 | 100.469702 | 99.5373011 | 99.7365799 |
| 100.099319 | 100.392246 | 99.8989404 | 100.128695 |
| 99.9229926 | 100.077312 | 99.8268795 | 99.9548967 |
| 100.014857 | 100.147847 | 99.9888832 | 99.9655103 |
| 99.9118881 | 99.884331  | 100.462351 | 99.703707  |
| 99.9620267 | 99.9421759 | 100.311556 | 99.8247321 |
| 100.045816 | 100.071544 | 99.7372036 | 99.72803   |
| 99.8827807 | 99.9664015 | 99.6315141 | 99.9801041 |
| 99.9238339 | 99.8894398 | 99.7006393 | 100.072973 |
| 99.8972503 | 99.8841662 | 99.6950346 | 100.050862 |
| 99.7907477 | 99.8404941 | 99.7697645 | 99.9895384 |
| 99.9462112 | 99.9378911 | 100.082029 | 100.243234 |
| 100.018391 | 99.983376  | 99.989417  | 100.11646  |
| 100.01368  | 99.8993278 | 100.680669 | 100.000447 |
| 99.9694298 | 99.8905934 | 100.450074 | 99.6706868 |
| 99.9978641 | 99.8343965 | 100.011569 | 99.8094013 |
| 99.957484  | 99.9644239 | 100.018775 | 99.8318078 |
| 99.8673017 | 99.8568093 | 99.7420076 | 99.8267958 |
| 99.9098691 | 99.8680157 | 99.8735857 | 99.7147629 |
| 99.9549602 | 99.7936908 | 99.8418254 | 99.8953423 |
| 100.212888 | 100.153615 | 99.9061465 | 100.150659 |
| 100.028822 | 100.063139 | 99.6646088 | 100.226134 |
| 99.7289997 | 99.7037098 | 99.9549879 | 100.300872 |
| 99.9840676 | 99.9050958 | 100.273391 | 99.8424215 |
| 100.166451 | 100.081103 | 99.9899508 | 99.6939779 |
| 99.9090278 | 99.8281341 | 99.9619271 | 99.7265559 |
| 100.216758 | 100.072863 | 100.673196 | 99.8434534 |
| 100.136839 | 100.238157 | 100.167167 | 99.6330968 |
| 100.060285 | 99.9902976 | 99.7820415 | 99.7819827 |
| 100.127249 | 100.092309 | 100.059877 | 99.8226683 |
| 100.043965 | 100.148341 | 100.052671 | 100.198716 |

99.9714488 100.154933 99.5706626 100.042901  
100.088888 100.133344 99.9013425 99.918486  
100.252427 100.305231 99.7270617 99.9490002  
99.978347 99.997384 100.471425 99.9584345  
99.9401542 99.8327485 99.8391565 99.7370221  
99.9835628 99.9401983 100.112454 99.9162748  
100.131287 99.985024 99.6688791 99.9324901  
100.208346 100.111591 100.033988 100.053663  
100.166115 99.9474495 100.325968 99.9669844  
100.097468 99.8675213 100.370006 99.8696927  
100.280862 100.220853 99.6288452 99.6905874  
100.204981 100.024906 100.208269 99.786405  
100.057593 99.8729598 100.040393 99.8738202  
100.061631 99.9952416 99.758555 100.348781  
99.9224879 99.7780348 99.6838251 100.378411  
99.9287131 99.6905258 99.6851595 100.362785  
100.023438 99.979256 99.6654095 100.259597  
100.198251 100.180972 99.8332849 100.330944  
99.9416684 99.9167966 99.7299975 100.205349  
99.9076818 99.8342317 100.057741 100.205497  
99.8639367 99.675529 99.9021432 100.167612  
99.7567611 99.6043352 100.341715 100.379737  
99.9992101 99.7218378 100.166367 100.196947  
100.126744 99.8060508 100.223215 100.302346  
100.003248 99.8690045 100.243499 100.261071  
99.8250708 99.7221674 100.363067 100.139309  
99.9487349 99.8788926 100.772747 100.361163  
99.9213101 99.8367037 100.656381 100.241465  
99.9778423 99.8222013 101.032433 100.293944  
100.160394 99.8142908 100.314492 100.294239  
100.057088 99.8910878 100.104981 100.194883  
99.9253481 99.692009 99.9611264 99.9753869  
99.9521 99.8136316 100.020377 100.11189  
100.036057 99.9228943 99.6128317 100.135771  
99.9512587 99.8048972 99.9659305 100.24117  
99.8922028 99.611092 100.060144 99.9946978  
100.068025 99.8296173 100.090836 100.018284  
100.521258 99.7523268 100.038267 99.8854503  
100.356196 99.5553216 99.9787952 100.100489  
100.073665 99.1695266 99.6368971 100.045109  
99.9938343 99.1825069 99.7939782 100.087233  
100.29628 99.4289688 99.9427919 99.9499618  
100.346744 99.4554224 99.6280963 99.7062026  
100.50303 99.6376398 99.780377 99.7606986  
100.323622 99.535276 99.516086 99.834931  
100.2605 99.4654451 99.8227809 99.9543803

|            |            |            |            |
|------------|------------|------------|------------|
| 100.270458 | 99.440799  | 100.163612 | 99.8228535 |
| 100.546406 | 99.8182143 | 100.7594   | 99.9233029 |
| 100.388432 | 99.7105926 | 100.862076 | 99.6771871 |
| 100.233158 | 99.9008611 | 101.123167 | 99.3369552 |
| 99.8183076 | 99.8633989 | 101.553073 | 99.1569711 |
| 99.9013452 | 100.088501 | 100.662858 | 99.4824743 |
| 100.135943 | 100.182978 | 100.356963 | 99.736249  |
| 99.6439624 | 99.9733209 | 100.139877 | 99.9272796 |
| 99.4145963 | 99.5094797 | 100.262021 | 99.8492178 |
| 99.5678446 | 99.6787168 | 100.405234 | 99.7545125 |
| 99.7705441 | 99.9378304 | 100.268955 | 100.004016 |
| 99.8701218 | 99.7874887 | 100.226285 | 100.041132 |
| 99.6323169 | 99.6685297 | 100.876478 | 99.9402408 |
| 99.8903748 | 100.105917 | 100.170013 | 99.831838  |
| 99.7253122 | 99.6769094 | 100.453239 | 100.002543 |
| 99.6336671 | 99.7963613 | 100.829807 | 99.7682102 |
| 99.8444679 | 99.8399029 | 100.433504 | 99.5104588 |
| 100.2605   | 100.499764 | 99.871852  | 100.509945 |
| 100.433326 | 100.551192 | 100.210016 | 100.637495 |
| 99.4733302 | 99.625974  | 100.729798 | 100.164411 |
| 99.6112199 | 99.604614  | 100.342295 | 100.158225 |
| 99.9693618 | 99.9782502 | 99.5838256 | 100.613046 |
| 99.8012613 | 99.9186064 | 100.422036 | 100.307279 |
| 99.7528227 | 99.757256  | 100.001464 | 100.206829 |
| 99.9595728 | 99.9319153 | 99.5456887 | 100.147031 |
| 99.955691  | 99.9698705 | 100.093739 | 100.475038 |
| 100.198728 | 100.362731 | 99.4662147 | 100.218023 |
| 100.317377 | 100.466409 | 99.504885  | 100.301535 |
| 100.199741 | 100.173612 | 100.362297 | 100.396534 |
| 100.345056 | 100.423032 | 99.5923597 | 100.221264 |
| 100.257968 | 100.248208 | 99.7393065 | 100.092682 |
| 100.09645  | 100.008154 | 100.799137 | 100.013148 |
| 99.9637922 | 99.8964248 | 100.106274 | 99.8908999 |
| 99.8419362 | 100.020313 | 99.8126466 | 100.167651 |
| 99.9705433 | 99.9325726 | 100.092139 | 100.126116 |
| 99.7263249 | 99.7704007 | 100.374298 | 100.146147 |
| 99.8787293 | 100.014727 | 99.4920838 | 100.089442 |
| 100.032146 | 100.072892 | 100.006264 | 100.195341 |
| 100.027083 | 99.8905097 | 99.882253  | 100.384457 |
| 100.105564 | 100.042495 | 99.0933804 | 100.371643 |
| 99.8535817 | 99.9169633 | 99.8630512 | 99.9879617 |
| 99.9847204 | 100.10181  | 99.4243442 | 99.738311  |
| 100.017632 | 100.232763 | 99.1120488 | 99.9889927 |
| 99.9389822 | 100.170162 | 100.425236 | 99.9178533 |
| 99.7934976 | 99.8652063 | 100.192682 | 99.7933962 |
| 99.9651424 | 100.039373 | 99.9537262 | 99.9797136 |

|            |            |            |            |
|------------|------------|------------|------------|
| 100.120247 | 100.169505 | 99.5054183 | 99.9038611 |
| 100.242947 | 100.238678 | 99.70437   | 99.7764582 |
| 100.257799 | 100.40693  | 99.2424608 | 99.7568691 |
| 100.395014 | 100.566801 | 99.4155434 | 99.7782257 |
| 100.03991  | 100.189879 | 100.106007 | 99.7437606 |
| 100.062526 | 100.090144 | 99.617162  | 99.8531945 |
| 100.063032 | 100.126292 | 99.5566231 | 100.072062 |
| 99.8939191 | 99.8247866 | 100.248687 | 99.8154892 |
| 100.139994 | 99.9825222 | 99.907322  | 99.7766055 |
| 100.384381 | 100.571073 | 99.1997902 | 100.203589 |
| 100.045648 | 100.270554 | 99.1675206 | 99.9601245 |
| 99.9847204 | 99.9595191 | 99.3840738 | 100.028171 |
| 100.091218 | 100.181006 | 99.4443461 | 100.11507  |
| 100.240416 | 100.32839  | 99.3840738 | 100.230984 |
| 100.574254 | 100.611329 | 99.0917803 | 100.200054 |
| 100.516364 | 100.670479 | 99.1221831 | 100.081489 |
| 100.272652 | 100.477089 | 99.9702611 | 99.8922254 |
| 99.848856  | 100.025078 | 100.586584 | 99.4139861 |
| 99.8351852 | 99.9961597 | 100.446305 | 99.3655288 |
| 100.267926 | 99.7171649 | 100.597252 | 100.495069 |
| 100.139656 | 99.3685035 | 101.51387  | 100.169271 |
| 99.906071  | 99.884759  | 101.316252 | 99.9807446 |
| 100.0578   | 100.090801 | 100.088139 | 100.225682 |
| 99.8761977 | 99.8773651 | 99.8294481 | 100.50317  |
| 99.5502919 | 99.2861852 | 99.889187  | 100.152628 |
| 99.5308827 | 99.2968652 | 99.9163895 | 100.082372 |
| 99.3580564 | 99.4912415 | 99.8107798 | 99.681753  |
| 99.6611775 | 99.5241031 | 99.9483924 | 99.4450635 |
| 99.9440455 | 99.9107196 | 99.7083703 | 99.9331711 |
| 99.7258186 | 99.7955398 | 100.109741 | 99.9748532 |
| 99.6097009 | 99.7707293 | 99.9347912 | 99.9137293 |
| 99.9519779 | 100.049396 | 100.039867 | 100.007403 |
| 99.8554383 | 99.9223855 | 100.530046 | 99.9869307 |
| 99.9188979 | 99.9554114 | 100.014799 | 99.9315509 |
| 99.9479273 | 99.9637911 | 100.060936 | 99.8627681 |
| 99.8633707 | 99.931751  | 99.4883501 | 99.9316982 |
| 99.9853955 | 100.206145 | 99.3339359 | 100.191364 |
| 100.152146 | 100.255931 | 99.0629777 | 100.100489 |
| 100.229108 | 100.389513 | 99.6566322 | 99.9969462 |
| 99.9561973 | 100.229641 | 99.7998454 | 99.9657214 |
| 99.9607543 | 100.212718 | 99.2160584 | 100.124938 |
| 100.021514 | 100.275319 | 100.261221 | 100.153364 |
| 100.122104 | 100.278276 | 100.317226 | 100.154837 |
| 100.131049 | 100.303087 | 99.8366488 | 100.292256 |
| 100.160922 | 100.222083 | 99.857184  | 100.218612 |
| 100.869266 | 100.298594 | 99.6230862 | 100.479996 |

|            |            |            |            |
|------------|------------|------------|------------|
| 100.500922 | 100.100512 | 100.01449  | 100.415469 |
| 101.077884 | 100.286658 | 100.064102 | 100.590848 |
| 100.765117 | 99.8945255 | 100.123911 | 100.330961 |
| 101.240159 | 100.238428 | 100.193524 | 100.265841 |
| 100.750307 | 100.083575 | 100.610616 | 100.367665 |
| 100.830728 | 100.433445 | 100.354125 | 100.509004 |
| 100.604912 | 99.9216247 | 99.7313301 | 100.000035 |
| 100.540256 | 100.201327 | 99.9242868 | 100.452765 |
| 100.747759 | 100.16826  | 99.795649  | 100.335401 |
| 100.676733 | 100.257623 | 99.8470257 | 100.138266 |
| 100.043079 | 99.8187121 | 100.150187 | 99.9392069 |
| 100.786775 | 100.232459 | 99.7946686 | 100.225438 |
| 100.366674 | 100.179551 | 100.013117 | 100.479108 |
| 100.713042 | 100.264882 | 99.8985985 | 100.454245 |
| 100.530701 | 100.156969 | 99.5642579 | 100.205458 |
| 100.506655 | 99.938723  | 99.5621009 | 100.310241 |
| 100.513662 | 100.229394 | 99.8772242 | 100.210786 |
| 100.78152  | 100.143903 | 99.8338874 | 100.013207 |
| 101.038071 | 100.041958 | 99.4320905 | 99.8934751 |
| 100.754288 | 99.7283814 | 99.5909267 | 99.8841512 |
| 101.10416  | 100.121643 | 99.6117127 | 100.215522 |
| 100.502037 | 99.9321095 | 99.8829109 | 100.20531  |
| 100.670841 | 100.031473 | 99.7921193 | 100.15129  |
| 100.604116 | 99.6449867 | 99.8687921 | 99.9326949 |
| 101.025968 | 100.169712 | 99.943504  | 100.232394 |
| 100.638832 | 99.9108173 | 99.6989746 | 99.9004311 |
| 100.707309 | 99.8838793 | 99.8940883 | 99.9523789 |
| 101.242229 | 100.319403 | 99.9758596 | 99.7571677 |
| 100.879618 | 99.8948481 | 99.8427116 | 99.6173084 |
| 100.938062 | 99.9834045 | 99.9966455 | 99.5675806 |
| 100.669249 | 100.098415 | 100.272746 | 99.6204164 |
| 100.852386 | 100.519905 | 99.8964414 | 99.7432558 |
| 100.711291 | 100.14729  | 99.9076188 | 99.7312679 |
| 100.661923 | 100.219716 | 99.9109524 | 99.692936  |
| 100.731993 | 100.412153 | 99.5842595 | 99.5752766 |
| 100.57561  | 100.174228 | 99.449935  | 99.7333399 |
| 100.414449 | 99.9734036 | 99.6275963 | 99.6575642 |
| 100.393587 | 100.192133 | 99.8219256 | 99.8766032 |
| 100.388332 | 100.372795 | 99.6646581 | 100.010247 |
| 100.676256 | 100.199392 | 99.828985  | 99.8560313 |
| 100.342309 | 100.218103 | 100.088614 | 99.9393549 |
| 100.528472 | 100.582491 | 99.9509556 | 100.257701 |
| 100.376548 | 100.405217 | 99.8356522 | 99.8554393 |
| 100.176371 | 100.320209 | 100.150972 | 99.8659473 |
| 99.9774679 | 100.238589 | 99.9005594 | 99.8764552 |
| 99.9725311 | 100.178745 | 99.8032967 | 99.8102995 |



|            |            |            |            |
|------------|------------|------------|------------|
| 100.116015 | 100.512807 | 99.9842916 | 99.9659948 |
| 100.070947 | 100.360374 | 99.5883775 | 100.261401 |
| 100.086872 | 100.16955  | 99.7389778 | 100.065154 |
| 99.9397257 | 100.293271 | 99.8085912 | 100.075366 |
| 99.8077076 | 100.179874 | 99.3762036 | 99.9910067 |
| 99.9523064 | 100.146806 | 100.146658 | 99.8894791 |
| 99.9675944 | 100.470384 | 99.9801736 | 99.9750228 |
| 99.889562  | 100.438446 | 100.0843   | 99.8594353 |
| 99.7769724 | 100.261172 | 100.248627 | 100.250153 |
| 99.9621799 | 100.082607 | 100.084888 | 99.9580028 |
| 100.063622 | 100.364084 | 100.139598 | 99.9329909 |
| 100.184652 | 100.09406  | 99.8191803 | 99.8911071 |
| 99.9015057 | 100.031473 | 100.126656 | 99.8968791 |
| 99.8268176 | 99.9322708 | 100.176464 | 100.010839 |
| 99.6331699 | 99.9311417 | 100.065475 | 100.115622 |
| 100.195003 | 99.7633846 | 99.8921274 | 100.027415 |
| 100.056456 | 99.9456591 | 100.359812 | 100.21419  |
| 99.700851  | 99.8029043 | 100.132931 | 99.9612588 |
| 99.5672405 | 99.4628735 | 99.935072  | 99.8761592 |
| 100.03432  | 99.6528907 | 100.285688 | 99.8245074 |
| 99.7768132 | 99.4564213 | 100.021157 | 99.711288  |
| 99.434267  | 99.4809396 | 100.319613 | 99.8023075 |
| 99.8456091 | 100.049539 | 100.074691 | 99.9819787 |
| 99.404965  | 99.654665  | 100.037825 | 100.008175 |
| 99.3202442 | 99.9050103 | 100.283139 | 100.074626 |
| 99.5021074 | 100.316177 | 99.9209532 | 100.289225 |
| 99.3549606 | 99.990018  | 100.460604 | 100.079658 |
| 99.0734071 | 99.8069369 | 100.433347 | 100.06397  |
| 99.2138653 | 99.9340452 | 100.145873 | 100.024899 |
| 99.2965159 | 99.8337135 | 100.509628 | 100.003291 |
| 99.0520676 | 99.7332205 | 100.027236 | 100.064118 |
| 99.1393364 | 99.7349949 | 100.207055 | 100.020459 |
| 99.3798036 | 100.111803 | 100.228037 | 100.262437 |
| 99.2000106 | 99.798549  | 100.053121 | 100.064562 |
| 99.1515987 | 99.5944983 | 100.131951 | 99.9482349 |
| 99.076592  | 99.7730629 | 100.025864 | 100.177042 |
| 99.1302592 | 99.4928762 | 100.207643 | 99.8733472 |
| 99.1797859 | 99.6932169 | 100.461193 | 99.5425687 |
| 98.9882084 | 99.6528907 | 100.471978 | 99.9476429 |
| 99.0262691 | 99.7374145 | 100.160384 | 99.9682148 |
| 99.1853596 | 99.9071072 | 100.084692 | 99.9819787 |
| 98.8319844 | 99.7888707 | 100.287257 | 100.274721 |
| 99.4293302 | 100.099544 | 100.054493 | 100.261845 |
| 99.7842979 | 100.295691 | 100.189406 | 99.9584468 |
| 99.2543148 | 99.6206297 | 100.438053 | 100.092682 |
| 98.961773  | 99.344637  | 100.385696 | 99.5971805 |

|            |            |            |            |
|------------|------------|------------|------------|
| 98.7552261 | 99.3365717 | 100.18117  | 99.6565282 |
| 99.125004  | 99.6830547 | 100.002528 | 100.118878 |
| 99.3573493 | 99.4435169 | 100.265098 | 99.931807  |
| 99.605142  | 99.628211  | 100.050964 | 100.146702 |
| 99.712317  | 99.6901521 | 99.8274163 | 99.919079  |
| 99.2227833 | 99.9172695 | 100.330202 | 100.251781 |
| 99.2981084 | 99.7364466 | 100.17568  | 100.173342 |
| 99.3365274 | 99.9455658 | 99.8091914 | 100.129481 |
| 100.12338  | 100.083936 | 100.128898 | 100.235706 |
| 99.8816522 | 99.7894352 | 100.143564 | 99.9035322 |
| 99.9191974 | 99.9891597 | 100.244658 | 100.061979 |
| 100.021928 | 100.045024 | 99.9513485 | 100.195056 |
| 99.7527203 | 99.6854557 | 99.9990601 | 99.7777246 |
| 100.210133 | 100.216655 | 100.031911 | 100.099216 |
| 100.272602 | 99.8427166 | 99.9409849 | 99.8522003 |
| 99.9752756 | 100.01354  | 100.022134 | 99.8450792 |
| 100.128812 | 100.175806 | 100.083729 | 100.157966 |
| 100.321011 | 99.901972  | 100.199488 | 99.8179296 |
| 100.201985 | 100.05003  | 99.8524056 | 99.9676229 |
| 100.259661 | 100.02242  | 99.6441561 | 100.013762 |
| 100.646457 | 100.567182 | 99.8821276 | 100.137344 |
| 100.703493 | 100.212942 | 99.7299979 | 99.996256  |
| 100.227548 | 100.224728 | 99.8936644 | 99.8790531 |
| 100.13648  | 100.200671 | 99.4640643 | 100.244162 |
| 100.521998 | 100.128014 | 99.4769699 | 100.038983 |
| 100.279632 | 100.100405 | 99.8316784 | 100.056638 |
| 100.552514 | 100.202447 | 99.6648833 | 100.381393 |
| 100.63751  | 100.163697 | 99.6828729 | 100.027263 |
| 100.560821 | 100.267999 | 99.74525   | 99.7069579 |
| 100.572644 | 100.240551 | 100.003558 | 100.079485 |
| 100.180576 | 99.9215085 | 100.145715 | 99.8343974 |
| 99.7741291 | 100.320473 | 100.015681 | 100.263449 |
| 100.032312 | 100.211327 | 100.207114 | 100.114497 |
| 100.229145 | 100.102988 | 100.101327 | 100.053225 |
| 100.282827 | 99.9050397 | 100.036213 | 99.8103634 |
| 99.9656896 | 100.202608 | 100.197728 | 100.212117 |
| 100.022567 | 100.092978 | 100.179348 | 99.9401766 |
| 99.9698436 | 100.297869 | 99.9648407 | 100.30855  |
| 100.547721 | 99.9755972 | 99.8907313 | 99.7051776 |
| 99.7757267 | 100.107832 | 100.227255 | 100.06005  |
| 99.7787623 | 100.15078  | 100.404413 | 100.140905 |
| 100.308869 | 100.45852  | 100.006491 | 100.073699 |
| 100.054999 | 100.162244 | 99.8991395 | 100.246684 |
| 99.9648908 | 100.229249 | 100.034844 | 100.149361 |
| 100.230264 | 100.577031 | 100.180716 | 100.03928  |
| 100.049567 | 100.033076 | 100.549308 | 99.9112468 |

|            |            |            |            |
|------------|------------|------------|------------|
| 99.5729825 | 100.098306 | 99.8729372 | 99.9949207 |
| 99.2825262 | 100.1109   | 100.162336 | 100.060347 |
| 99.5830478 | 100.399265 | 99.884083  | 100.244904 |
| 99.4472459 | 100.038082 | 99.7542448 | 99.9094665 |
| 99.459548  | 100.333228 | 99.7794694 | 99.9435889 |
| 99.935973  | 100.269291 | 100.04599  | 99.7614052 |
| 99.9199963 | 99.8559562 | 99.9140005 | 99.683814  |
| 99.8367577 | 99.4355175 | 99.9255373 | 99.7933022 |
| 99.5530116 | 99.1862252 | 100.443717 | 99.3827956 |
| 99.565793  | 99.6207108 | 100.249155 | 99.8244574 |
| 99.7551168 | 99.3210433 | 100.048727 | 99.7639273 |
| 99.7624661 | 99.9176335 | 99.9963226 | 100.137344 |
| 99.8308463 | 100.24927  | 99.874306  | 100.275317 |
| 100.202304 | 100.55039  | 99.8007832 | 100.261075 |
| 99.8473023 | 100.202931 | 99.9581924 | 100.016729 |
| 99.8222189 | 100.032754 | 100.110713 | 100.097436 |
| 99.900984  | 99.8086488 | 100.347902 | 99.8142207 |
| 100.096059 | 100.423968 | 99.8647246 | 100.071028 |
| 100.036786 | 99.8759771 | 99.800001  | 99.7855876 |
| 99.9158423 | 100.237968 | 99.8715684 | 100.021774 |
| 99.4729684 | 100.075056 | 99.9867412 | 99.9907667 |
| 100.049727 | 100.508573 | 99.7671504 | 99.9226704 |
| 99.9738377 | 100.338879 | 100.126161 | 99.8566511 |
| 99.8671134 | 99.9022949 | 99.8146665 | 99.916291  |
| 100.055958 | 100.259603 | 99.534654  | 100.100552 |
| 99.8784569 | 100.068436 | 99.7284336 | 100.086161 |
| 99.6038175 | 100.113483 | 99.9229953 | 100.267009 |
| 100.115551 | 100.141738 | 99.921431  | 99.9668811 |
| 99.8835694 | 100.050837 | 99.8570985 | 100.180962 |
| 100.035508 | 99.8869563 | 100.153927 | 99.7798016 |
| 99.9131263 | 100.078769 | 100.015681 | 99.9993715 |
| 99.9425234 | 100.201639 | 99.7630441 | 100.290747 |
| 99.6661266 | 100.127207 | 99.8044984 | 100.03023  |
| 99.6701208 | 99.8272165 | 100.015681 | 100.087941 |
| 99.8087985 | 99.7855602 | 99.8375446 | 100.015097 |
| 100.009146 | 99.5656533 | 100.007664 | 100.001597 |
| 99.8466633 | 100.109285 | 100.106998 | 100.037945 |
| 99.6983995 | 99.6991797 | 99.8838874 | 100.19194  |
| 99.8311659 | 99.8251176 | 100.177588 | 100.126366 |
| 99.900984  | 99.7122579 | 99.93375   | 100.262707 |
| 100.094941 | 100.220207 | 100.001798 | 100.043582 |
| 100.056917 | 99.8772688 | 100.172699 | 99.9613918 |
| 100.145108 | 100.11203  | 100.175241 | 100.084232 |
| 99.7244416 | 99.6986954 | 100.140631 | 100.125921 |
| 99.792023  | 99.6129607 | 99.9259284 | 100.057231 |
| 99.8310061 | 99.8083259 | 100.110713 | 100.137641 |

|            |            |            |            |
|------------|------------|------------|------------|
| 100.179937 | 99.4800802 | 99.9572147 | 99.942402  |
| 100.265572 | 99.7103204 | 100.143759 | 99.998333  |
| 100.180576 | 99.6791588 | 100.317789 | 99.9524903 |
| 100.099415 | 99.2509702 | 100.417906 | 99.677583  |
| 100.221317 | 99.778456  | 100.15119  | 99.8927021 |
| 99.8041653 | 99.8577322 | 99.8316784 | 99.782027  |
| 99.9092919 | 99.4203404 | 100.081773 | 99.7851425 |
| 99.7476078 | 99.4020956 | 100.245831 | 100.065242 |
| 100.142072 | 99.5249657 | 100.106607 | 99.6669012 |
| 100.115231 | 99.7621487 | 99.9190845 | 100.039873 |
| 99.8714271 | 99.8691958 | 100.067108 | 100.079188 |
| 99.7223646 | 99.5934242 | 100.124596 | 100.0826   |
| 99.9148837 | 99.9812482 | 100.392877 | 99.9993715 |
| 100.254868 | 99.8336749 | 100.460533 | 99.5065262 |
| 99.0886666 | 100.332673 | 100.615422 | 100.25873  |
| 99.2878601 | 99.4519576 | 100.564534 | 99.6895869 |
| 99.8045231 | 99.8399401 | 100.239242 | 99.5774265 |
| 99.5428532 | 99.801288  | 99.8736308 | 99.9913624 |
| 100.1859   | 100.068117 | 100.20499  | 99.8139613 |
| 99.5655863 | 99.7853724 | 100.268209 | 99.9451875 |
| 99.7285339 | 99.7718929 | 100.401301 | 100.199447 |
| 99.6205911 | 99.4173657 | 100.527542 | 100.099054 |
| 99.2009017 | 99.4154168 | 100.553769 | 100.03426  |
| 99.4595512 | 99.4548809 | 100.379184 | 99.894544  |
| 99.567494  | 99.8360424 | 100.270362 | 100.057646 |
| 99.4824433 | 100.249522 | 100.006723 | 100.166529 |
| 99.3223573 | 100.194467 | 99.9683608 | 99.9177804 |
| 98.9581495 | 100.034987 | 99.9820615 | 100.155209 |
| 99.3609878 | 99.715214  | 100.071116 | 99.8811384 |
| 100.294638 | 100.222726 | 100.100865 | 99.8007046 |
| 100.208792 | 100.598528 | 99.5894407 | 100.252623 |
| 100.111183 | 100.164747 | 100.17387  | 100.043942 |
| 99.7522209 | 99.7550029 | 100.622859 | 99.9782547 |
| 99.7919642 | 99.4452991 | 100.481156 | 99.582044  |
| 99.0214209 | 99.4414014 | 100.097734 | 99.6757344 |
| 100.007691 | 99.4103823 | 100.719155 | 99.3517651 |
| 99.7067546 | 100.096213 | 100.148426 | 99.7053757 |
| 99.5647915 | 99.6671425 | 100.160561 | 99.7181855 |
| 99.2218862 | 99.9485881 | 100.091275 | 100.173083 |
| 99.7663696 | 99.7182997 | 100.077574 | 99.9591889 |
| 100.479365 | 99.705145  | 100.11574  | 99.7134191 |
| 99.8108821 | 99.8440001 | 100.112413 | 99.7086527 |
| 98.806648  | 99.5325099 | 99.9372408 | 99.9429532 |
| 100.039009 | 100.056099 | 100.409129 | 100.066881 |
| 99.9545939 | 100.14331  | 100.202054 | 99.8783083 |
| 100.10848  | 99.9258516 | 99.7240983 | 99.9422084 |

99.8771739 99.9468017 100.211058 99.7721059  
100.032014 99.8673863 100.149405 99.5203781  
99.3579673 99.5869151 100.177002 99.8586467  
99.008544 99.7077435 100.114566 100.280924  
100.576338 100.003318 99.8117823 99.9630616  
100.435647 99.8961317 99.7988645 99.8382404  
100.436919 99.7395746 99.6700787 99.7287611  
100.576497 99.6323881 99.9994808 99.6395392  
99.7870361 99.5182184 100.089709 99.6096  
99.1485995 99.5224408 99.9260846 99.796534  
99.5401506 99.1177309 100.282497 99.6547323  
100.566959 99.3340526 99.9904776 99.477927  
99.9173941 99.8555308 99.9112097 99.7293569  
99.543966 99.5437157 99.9249103 100.017578  
100.067942 99.6218319 100.39582 99.888288  
100.458698 99.6167974 100.253334 99.7798514  
100.450114 99.7907317 99.724294 99.771957  
100.15331 99.8003136 100.16976 99.7299527  
100.144249 99.3369758 100.478807 99.4372632  
100.167459 99.5461518 99.9237359 99.3967485  
100.378417 99.888986 99.9256932 99.7762766  
100.454406 100.141524 99.705896 99.6915233  
99.8375896 100.147857 99.8761752 99.6803519  
99.9876603 100.207784 100.214776 100.039325  
100.380324 100.163935 100.012594 100.001491  
100.622123 99.9679142 99.6604882 100.090713  
100.635317 99.5731108 99.795733 99.4740542  
100.765516 100.028328 100.172892 99.8856069  
100.465216 99.8452994 99.8405536 100.330823  
100.532462 99.9934115 99.7156822 100.173381  
100.322299 99.9531354 100.167998 100.071647  
100.279694 99.845137 100.066614 99.9165888  
100.412278 99.9615804 99.8313546 99.9033321  
99.7293288 99.3819617 100.247854 99.6688826  
99.6577908 99.335027 99.9679694 99.6265804  
99.6137552 99.06024 99.9998723 99.710589  
100.559646 100.217853 100.02375 100.036942  
100.692707 99.8733952 100.152341 100.034856  
100.441847 99.9450152 99.8489697 99.8662432  
100.6226 100.309124 99.9164942 100.301777  
100.220556 99.9874026 99.9092524 99.9980652  
100.042824 100.468767 99.5980526 100.193787  
100.256166 100.364829 99.783011 100.148059  
99.6156629 99.9234155 99.8724565 99.8753293  
99.6649446 99.8961317 100.036473 100.023685  
99.9159634 99.9461521 99.6389587 99.8231963

|            |            |            |            |
|------------|------------|------------|------------|
| 100.090357 | 100.350375 | 99.7616771 | 100.101289 |
| 100.217059 | 100.325365 | 99.9386109 | 100.137037 |
| 100.025973 | 100.358657 | 99.8851785 | 100.204214 |
| 100.169049 | 100.605673 | 99.7419091 | 100.541887 |
| 100.236453 | 100.602263 | 99.9675779 | 100.696498 |
| 100.008963 | 100.216229 | 100.155276 | 100.262156 |
| 100.238202 | 100.602263 | 99.8857656 | 100.523715 |
| 99.8786047 | 100.344528 | 99.8971176 | 100.103374 |
| 99.9439427 | 100.452689 | 100.002025 | 100.453559 |
| 100.11627  | 100.558252 | 99.5888536 | 99.9930009 |
| 100.186218 | 100.523497 | 99.7775307 | 100.088926 |
| 100.112136 | 100.68785  | 99.6501149 | 100.527289 |
| 100.213879 | 100.508394 | 99.7240983 | 100.567655 |
| 100.215787 | 100.467305 | 99.9734496 | 100.34676  |
| 99.9458504 | 100.406079 | 99.9464398 | 100.522374 |
| 100.020409 | 100.671122 | 99.9219744 | 100.539503 |
| 100.24313  | 100.458373 | 99.9264761 | 100.315927 |
| 99.9790758 | 100.643351 | 99.9468313 | 100.545759 |
| 100.452339 | 100.831415 | 99.642286  | 100.395765 |
| 100.098624 | 100.966859 | 99.6240837 | 100.404256 |
| 99.92423   | 100.72975  | 99.6101874 | 100.408426 |
| 99.9925885 | 100.813713 | 99.6763418 | 100.561399 |
| 99.9890911 | 100.698893 | 99.8474039 | 100.625746 |
| 100.607119 | 99.8239819 | 100.267582 | 99.6427226 |
| 100.116426 | 99.9586045 | 99.9947029 | 99.561286  |
| 100.078202 | 99.6004696 | 100.540461 | 99.2710112 |
| 100.153056 | 99.5758318 | 99.8200368 | 99.5392641 |
| 99.8404205 | 99.9439506 | 100.216221 | 99.4737897 |
| 100.000163 | 99.7796981 | 99.8608118 | 99.7068668 |
| 100.426673 | 100.291779 | 99.7418193 | 99.5676413 |
| 100.2561   | 100.180184 | 99.8029818 | 99.9826574 |
| 100.39482  | 100.20917  | 99.6524278 | 99.9396482 |
| 100.516338 | 100.419478 | 99.8263099 | 100.011921 |
| 100.370452 | 99.5201147 | 99.6888901 | 100.032761 |
| 100.004144 | 99.1297735 | 100.818633 | 99.5209372 |
| 100.026123 | 99.4565071 | 100.587117 | 99.6753859 |
| 100.29958  | 99.6333201 | 99.7355462 | 99.9554626 |
| 100.331592 | 99.7375078 | 100.000976 | 99.8768342 |
| 100.141589 | 99.223494  | 100.02156  | 99.9201389 |
| 99.7905708 | 98.6706716 | 100.331489 | 99.2736716 |
| 100.146208 | 99.4199529 | 100.257388 | 99.6697695 |
| 100.146049 | 99.4571513 | 100.144669 | 99.7021372 |
| 99.9460128 | 99.4096469 | 100.542421 | 99.7906681 |
| 100.144297 | 99.8766393 | 99.6485072 | 99.9160006 |
| 100.501049 | 100.476644 | 99.8811993 | 100.368705 |
| 100.112603 | 100.081955 | 100.127222 | 100.151886 |

99.3967101 99.1986951 100.066059 99.5771004  
99.5711045 99.2262316 100.55634 99.3440233  
100.092377 99.9447558 99.8835517 100.145235  
100.061798 99.5001468 100.277384 99.7971712  
100.519842 99.7958013 100.255428 99.8582117  
100.436228 99.6557036 99.8753183 99.6384364  
100.418232 100.052003 100.455971 99.9944812  
100.40995 99.9922602 100.058806 100.008522  
99.8682918 99.7721296 100.248567 100.096018  
99.2154673 98.9184996 100.123889 99.1814458  
100.422532 100.127849 99.9188378 99.4492553  
100.148119 99.9131935 100.153098 99.9196955  
99.9891734 99.6840452 99.8439529 99.7121875  
99.2887289 98.8890308 100.169369 99.2627346  
100.263745 100.170522 99.7296652 100.004975  
99.9044448 99.5586013 99.9690225 99.8821549  
99.9190971 99.5545756 100.338154 99.7587438  
100.099066 100.083887 99.7796538 100.31269  
100.12407 99.7695531 100.006857 100.176864  
100.232689 100.164886 100.056454 100.097201  
100.004144 99.6357356 99.9978395 99.8267307  
100.061957 100.04057 100.02646 99.9059503  
99.8778476 99.6772818 99.6814408 99.9860567  
99.8996669 99.8677826 99.9305999 100.248841  
100.42062 100.208848 99.5981265 99.9298936  
100.38399 100.665373 99.4438478 100.321114  
100.21931 100.035739 99.838856 100.006896  
99.9167081 99.9325174 100.138396 99.6353327  
100.118815 99.8552221 100.117616 99.8760952  
100.207047 99.9080405 99.9827449 99.9867957  
100.139678 100.027848 99.6000868 99.9869435  
100.006692 99.834932 100.071352 99.9028466  
100.17599 100.301441 99.9013908 100.023302  
100.023256 100.315129 99.7716164 100.196225  
99.6716003 99.4901628 99.9068798 99.8287999  
98.9418512 98.5014271 100.415392 99.6583891  
99.5908533 99.6929019 100.303652 100.195634  
99.9488795 100.178574 99.6565445 100.5771  
99.9355013 99.991294 99.9225625 100.33412  
99.8703622 100.210458 100.133691 100.382894  
100.350544 100.118187 99.983529 100.336042  
100.051446 100.562957 100.032733 100.355108  
99.9734062 100.268752 99.9948989 100.29791  
100.000959 100.029781 99.9213863 100.019755  
99.8651065 100.18888 99.9339324 100.124395  
99.9554094 100.187753 99.7218238 100.183219

|            |            |            |            |
|------------|------------|------------|------------|
| 100.209755 | 100.420283 | 100.170153 | 100.202433 |
| 99.3298191 | 99.8879115 | 99.9053115 | 99.4328498 |
| 100.021982 | 100.504019 | 99.9427539 | 100.199033 |
| 99.8064972 | 100.503375 | 99.9098203 | 99.9810316 |
| 100.004622 | 100.42608  | 100.029205 | 100.118483 |
| 99.8568248 | 100.244275 | 100.161724 | 100.078726 |
| 99.4362077 | 99.9652068 | 99.9249149 | 99.5533049 |
| 100.38399  | 100.532039 | 99.7555416 | 100.192235 |
| 99.9944291 | 100.506113 | 99.9570644 | 99.9564972 |
| 100.244156 | 100.528013 | 100.079782 | 100.146269 |
| 100.111011 | 100.353294 | 99.9927426 | 99.7519451 |
| 99.6779709 | 100.279863 | 100.188776 | 99.9526544 |
| 99.7058422 | 100.114322 | 100.085271 | 99.9217647 |
| 99.8963223 | 100.244275 | 100.159763 | 100.076213 |
| 99.8079306 | 100.00466  | 100.149178 | 100.072962 |
| 99.6246174 | 100.125434 | 99.7667156 | 99.9136358 |
| 99.8794403 | 100.432038 | 99.7884753 | 100.442752 |
| 99.790093  | 100.334614 | 99.7639711 | 100.456054 |
| 99.0219611 | 99.657958  | 100.136239 | 99.7055366 |
| 99.9769101 | 100.539447 | 99.7678918 | 100.27042  |
| 99.8940926 | 100.637837 | 100.153686 | 100.552122 |
| 100.154171 | 100.528496 | 99.8025898 | 100.241303 |
| 100.004463 | 100.457642 | 100.067235 | 100.17243  |
| 100.038545 | 100.483891 | 100.12781  | 100.451472 |
| 100.08298  | 100.266497 | 99.9525556 | 100.288451 |
| 99.7652478 | 100.374711 | 100.243078 | 100.189131 |
| 100.057339 | 100.385178 | 100.002544 | 100.396787 |
| 100.026123 | 100.633006 | 99.7843586 | 100.287564 |
| 99.878644  | 100.584696 | 99.8806112 | 100.340032 |
| 99.942509  | 100.736066 | 99.8729659 | 100.41334  |
| 99.8279979 | 100.414808 | 99.8743381 | 100.542811 |
| 100.370277 | 100.030595 | 100.099093 | 100.097886 |
| 100.431535 | 100.001165 | 100.225193 | 100.156241 |
| 100.640333 | 100.002896 | 100.2087   | 100.138108 |
| 100.519565 | 100.005493 | 100.33669  | 99.9000512 |
| 100.644116 | 100.062189 | 100.047725 | 100.131563 |
| 100.415238 | 100.026844 | 100.215744 | 99.9224116 |
| 100.471985 | 100.056562 | 99.9188764 | 100.078116 |
| 100.233794 | 99.8936879 | 100.035012 | 99.9177759 |
| 100.297816 | 99.8957076 | 99.938805  | 99.8832809 |
| 100.319351 | 99.9620692 | 99.9329639 | 99.7962934 |
| 100.380899 | 100.096379 | 99.824559  | 100.093387 |
| 100.21677  | 99.9626463 | 99.9946395 | 100.025488 |
| 100.26857  | 99.8695958 | 99.9199072 | 100.013626 |
| 100.288504 | 100.042857 | 99.9942959 | 100.019761 |
| 100.435172 | 100.068536 | 100.091018 | 100.143425 |



|            |            |            |            |
|------------|------------|------------|------------|
| 100.306692 | 100.041703 | 100.046694 | 100.20778  |
| 100.570346 | 100.20703  | 99.9408666 | 100.24132  |
| 100.438664 | 100.241221 | 99.8766139 | 100.103204 |
| 100.291851 | 100.175003 | 99.9016965 | 100.026715 |
| 100.311785 | 100.193469 | 99.9721339 | 99.9498167 |
| 100.240197 | 99.9252818 | 100.145307 | 99.9390455 |
| 100.421204 | 100.180341 | 100.018176 | 100.166876 |
| 100.414802 | 100.080366 | 100.039307 | 100.087933 |
| 100.418585 | 100.182649 | 99.914925  | 100.253727 |
| 100.258094 | 100.099842 | 100.069715 | 100.141653 |
| 100.606867 | 100.485893 | 99.8133921 | 100.324899 |
| 100.41     | 100.156393 | 100.070918 | 100.070208 |
| 100.332883 | 100.085848 | 99.7883095 | 100.206416 |
| 100.792822 | 100.479978 | 99.9432718 | 100.379028 |
| 100.705228 | 100.482864 | 100.0558   | 100.216233 |
| 100.585624 | 100.510707 | 99.8295411 | 100.056847 |
| 100.723998 | 100.776586 | 100.092565 | 100.339351 |
| 100.58184  | 100.579376 | 100.164376 | 100.118747 |
| 100.298253 | 100.433237 | 100.026422 | 100.160195 |
| 100.594208 | 100.733162 | 100.024876 | 100.323536 |
| 100.415966 | 100.566248 | 99.9296997 | 99.9725862 |
| 100.249945 | 100.47969  | 100.053395 | 100.005581 |
| 100.349616 | 100.573462 | 99.983129  | 100.299948 |
| 100.14591  | 100.365865 | 100.088957 | 99.9365913 |
| 99.741408  | 100.030306 | 99.865447  | 99.6904905 |
| 100.166135 | 100.299792 | 100.286353 | 100.114248 |
| 100.090909 | 100.355911 | 99.9577028 | 100.054665 |
| 99.8189618 | 100.140091 | 99.5941772 | 99.8917342 |
| 99.9669396 | 100.300369 | 99.6312857 | 100.138926 |
| 99.8586844 | 100.064353 | 99.8505006 | 99.9552705 |
| 100.00899  | 100.244827 | 100.113868 | 99.9795397 |
| 99.9523892 | 100.232998 | 100.13036  | 100.206689 |
| 99.7451911 | 100.153797 | 99.9741955 | 100.057528 |
| 99.5033631 | 99.8639695 | 99.9649184 | 99.7980659 |
| 99.8508272 | 100.089743 | 99.846721  | 100.076889 |
| 99.8528643 | 100.202414 | 100.021955 | 99.9814485 |
| 99.7446091 | 100.103304 | 99.917502  | 100.076889 |
| 99.8477716 | 100.083684 | 99.8113305 | 100.149424 |
| 99.6440657 | 99.8431954 | 99.911489  | 100.036941 |
| 99.843261  | 100.087579 | 99.8810807 | 100.248546 |
| 99.7681808 | 99.9842859 | 100.062844 | 99.9935831 |
| 99.7549399 | 99.9887581 | 99.8283386 | 100.062573 |
| 99.8420969 | 99.9617807 | 100.12933  | 100.008445 |
| 99.6762221 | 99.9190784 | 100.133796 | 99.9014146 |
| 99.8295836 | 99.8573333 | 100.13225  | 99.8884619 |
| 99.8613035 | 99.8359822 | 100.167984 | 99.8197446 |

100.035618 99.9726005 99.8242154 100.075935  
100.051332 100.195777 100.248901 100.038031  
99.7561039 99.8097261 100.476019 99.7706607  
99.982363 100.116576 100.342875 100.08357  
99.77371 99.9097013 100.382904 99.9078228  
99.9916753 100.169377 100.212652 100.278815  
99.8653776 99.8903698 100.037074 99.9848571  
99.9913843 99.8619498 99.6170264 100.130472  
99.9227063 99.8178049 99.8030842 99.9018236  
99.7016854 99.6824849 99.7259466 99.7875674  
99.9161586 99.9659644 99.7731912 100.041304  
99.688299 99.6308383 99.79982 99.9220025  
99.7013943 99.7412005 99.7960404 99.9162761  
99.7868053 100.026267 99.9240303 99.9417724  
99.7438816 99.8752221 100.053566 99.9503621  
99.6311158 99.6827734 100.055113 99.9442266  
99.5410487 99.5989558 99.9022119 100.010081  
99.6621082 99.6894096 99.9338228 99.8414233  
99.7534849 99.6690683 100.272953 99.7679338  
99.8396234 99.8394445 99.935369 99.8787815  
99.8738169 99.8214115 99.8324617 100.026715  
99.7770566 99.6273759 99.8175152 99.9379548  
99.6973202 99.6684913 99.8542801 99.9736769  
99.8797825 99.7645713 99.9573592 100.022215  
99.6773861 99.6520451 99.8008508 99.9383638  
99.6775317 99.6817636 99.9917189 99.9892201  
99.4569472 99.4748885 100.106309 99.9003238  
99.4338121 99.5102333 100.069544 99.7898852  
99.5669484 99.5623127 100.115586 99.7960207  
99.3498561 99.3226896 99.9339946 99.7327571  
99.4728072 99.444593 99.8188896 99.7990203  
99.570004 99.3483687 100.409189 99.5964131  
99.9649025 99.7977521 100.415718 99.7226676  
99.7184183 99.7915488 100.137748 99.7297575  
99.7510113 99.749135 100.223132 99.8854624  
99.758432 99.6703667 100.503679 99.7769325  
99.793935 99.9381213 100.328444 99.8969152  
99.8528643 99.857189 100.162143 99.8204263  
99.6443567 99.6438221 99.7510292 99.8606478  
99.7732158 99.962514 99.7215514 99.9761728  
99.7634696 99.7752969 99.6914923 99.7934245  
99.8280563 99.8033217 99.835948 99.9730314  
99.765797 99.8836402 100.136883 99.7266353  
99.7260849 100.008018 99.8287338 99.9663388  
99.7953266 100.021597 99.9759379 99.797522  
99.6094213 99.8294685 99.997237 99.90993

99.7292851 99.9477793 100.134822 100.213828  
99.6409874 99.8273017 100.304699 99.9474904  
99.7983813 99.8969303 100.134822 99.878789  
99.7803436 99.9307333 100.153029 99.6771922  
99.9086444 100.24984 99.90225 100.118493  
99.9124265 100.229327 99.8836992 99.96989  
99.7928536 99.9963171 99.9671778 99.9842312  
99.7291396 99.9629474 100.015444 99.8490139  
99.6532065 100.044855 100.120565 99.8313946  
99.7141567 99.8938966 100.223969 99.8944961  
99.7817982 100.077213 100.16574 99.9428465  
100.066038 100.242328 100.497937 99.9769923  
100.001161 100.19668 99.6205526 99.9641535  
100.247289 100.208525 99.5649002 100.011958  
100.159864 100.092959 99.7220667 99.9331491  
100.277691 99.8982304 99.6811863 100.034767  
100.11957 99.6002143 99.8316539 99.9810898  
100.124516 99.5300079 99.6028607 100.147448  
100.352751 99.7947987 99.8201455 100.164521  
100.101241 99.6143711 100.038461 100.039547  
100.2758 99.7404826 99.8277032 99.9595097  
100.166555 99.6782214 99.830795 99.9894214  
100.454432 99.7344154 100.160931 100.043918  
100.442213 100.09816 100.19683 100.116854  
100.180811 100.127051 100.297657 100.014416  
99.8689322 100.253307 100.272751 100.26409  
99.7513959 99.9242327 100.255059 100.060308  
100.081167 100.316146 99.8077783 100.136522  
100.064875 100.135141 99.7979876 99.9987091  
100.240597 100.257352 99.4470683 100.076425  
99.8378026 99.8860959 99.8419599 99.8626722  
99.7887806 99.9434456 99.7938652 100.036816  
99.8300929 99.8008659 100.049282 99.9753533  
99.7944538 99.9688702 99.9343704 100.301377  
99.6972826 99.8742504 99.8519223 99.9901043  
99.8252925 99.9597693 99.7571071 100.200852  
99.8756237 99.908198 99.9946605 100.083937  
99.9812318 100.048322 99.6853087 100.175857  
100.078112 99.9103648 99.8855886 100.102785  
100.059492 100.061467 99.5647285 100.129692  
99.9885051 99.9775376 99.9659754 99.9326028  
99.9810863 100.055256 100.225687 99.8767403  
99.9438471 99.9294332 100.401576 99.7939708  
100.065311 99.9641031 100.262616 99.9158031  
99.9842866 99.9957393 100.214865 99.9558219  
100.152009 100.14482 100.264334 99.9625145

|            |            |            |            |
|------------|------------|------------|------------|
| 100.051201 | 100.01293  | 100.297142 | 99.9670218 |
| 100.048146 | 100.084725 | 100.26004  | 99.9799972 |
| 99.9146085 | 100.161432 | 100.050656 | 99.8955888 |
| 100.145463 | 100.096715 | 100.302123 | 100.031352 |
| 100.011489 | 99.9025641 | 100.40003  | 99.9267297 |
| 100.222996 | 100.064501 | 100.201983 | 99.8797451 |
| 100.050764 | 99.9838938 | 100.23668  | 99.9227688 |
| 100.095131 | 100.045722 | 100.165912 | 99.8536577 |
| 99.9870504 | 100.021019 | 100.131215 | 99.9092471 |
| 100.008579 | 100.050778 | 99.9288738 | 100.071371 |
| 99.9879232 | 100.00614  | 100.020941 | 99.9287785 |
| 99.971631  | 100.081403 | 99.9451917 | 99.963334  |
| 99.7579419 | 99.9266885 | 99.9792015 | 99.8912181 |
| 100.072002 | 99.8875405 | 99.9183961 | 99.976446  |
| 99.8353296 | 100.004985 | 99.8591365 | 100.107702 |
| 99.8795512 | 99.8732392 | 100.025063 | 99.9768558 |
| 99.787035  | 99.9375229 | 99.8890239 | 100.043372 |
| 99.8034726 | 99.9263996 | 99.8756261 | 100.201399 |
| 99.7621604 | 99.9958837 | 99.8627436 | 100.142121 |
| 99.9471928 | 99.8979415 | 99.8675531 | 100.119995 |
| 99.7355401 | 99.9058866 | 99.8495176 | 100.045557 |
| 100.057165 | 100.059878 | 99.7244715 | 100.022475 |
| 99.9646487 | 100.025931 | 99.8251267 | 100.011002 |
| 100.131934 | 100.092959 | 100.072643 | 99.9515879 |
| 99.948502  | 99.9997841 | 100.04327  | 99.9078812 |
| 99.9578118 | 100.063923 | 100.046019 | 99.9565049 |
| 99.7132839 | 100.02362  | 99.9445046 | 99.9317833 |
| 99.9298824 | 100.029398 | 99.9446764 | 100.170667 |
| 100.00087  | 100.173567 | 99.915476  | 100.082571 |
| 100.063565 | 100.190613 | 100.154232 | 99.9055593 |
| 100.092513 | 100.292744 | 99.845567  | 99.9892848 |
| 100.11957  | 100.104371 | 100.003077 | 99.9907872 |
| 100.198703 | 100.243773 | 99.611449  | 100.05662  |
| 100.275945 | 99.9963171 | 99.889711  | 99.916486  |
| 100.32904  | 100.179923 | 99.866866  | 100.107156 |
| 100.198703 | 99.9698814 | 100.125718 | 100.014689 |
| 100.242634 | 100.120695 | 99.9974087 | 100.118629 |
| 100.20874  | 100.091659 | 100.249562 | 100.007041 |
| 100.221832 | 100.176167 | 100.187554 | 99.9612853 |
| 100.096586 | 100.01163  | 100.253685 | 99.9175786 |
| 100.159573 | 99.9476349 | 100.098408 | 100.008953 |
| 99.9770133 | 99.9243772 | 99.933168  | 100.034221 |
| 99.9871959 | 99.761429  | 100.099438 | 99.7669274 |
| 100.017162 | 99.8583601 | 100.001531 | 99.9524074 |
| 99.9930145 | 99.885807  | 100.055809 | 99.8822036 |
| 100.128152 | 100.149876 | 100.071955 | 100.073147 |

99.8889439 99.6875651 100.010154 99.4762729  
99.8947512 99.8623908 99.7019266 99.6976213  
99.8925734 99.8763711 100.202883 99.6156202  
99.9329344 99.864841 99.9082127 99.7190069  
99.7855733 99.8280887 99.8898495 99.6064939  
99.9319182 99.9654414 99.616117 99.7699511  
100.050243 99.8554727 99.8903643 99.9024877  
100.141999 99.9609735 99.9171369 99.9030326  
99.9928952 99.8197293 100.234117 99.7650474  
99.9367092 99.6903035 99.8831563 99.7605523  
99.699044 99.7142285 99.9859561 99.6372783  
99.8284024 99.5872529 100.133205 99.6696973  
99.8394363 99.725038 99.6959199 99.8911819  
99.8272409 99.4808873 100.089786 99.7548313  
100.080005 99.7310914 100.11776 99.6942159  
100.28602 99.645336 100.012214 99.6236569  
100.136627 99.4533591 100.173707 99.7549675  
99.8660049 99.6554248 100.164097 99.9874855  
99.9719888 99.4140125 100.028003 99.5149578  
100.314912 100.42535 101.04742 100.27122  
101.266154 100.317111 101.157428 100.306227  
100.091039 99.1436308 100.211464 100.198209  
100.347143 99.6513893 100.324561 100.265908  
100.045742 99.6751702 99.8102182 99.8012804  
100.520927 100.105244 99.500789 99.9373586  
100.252628 100.003635 99.9068397 99.8409188  
100.382277 100.201809 99.5433506 100.137866  
100.055324 99.9681799 99.7673134 99.8663909  
99.9307567 99.8922251 99.8100466 100.025081  
99.9407743 100.049611 99.7582176 99.876607  
100.082473 99.9719271 99.9643321 99.846776  
100.184828 99.9302745 99.9104438 100.025489  
99.7614728 99.7949395 100.019422 99.9542492  
99.7320006 100.08694 99.835103 100.041563  
99.6819123 99.9358955 100.075713 100.055048  
99.9397581 99.905773 100.049627 99.9921168  
99.7079002 99.8118023 99.9183382 99.9361327  
99.9124636 100.163183 100.036412 100.122202  
99.8337742 99.946705 100.055805 99.935724  
99.8586005 100.189847 100.000372 100.112803  
99.8358067 100.027992 99.8510636 100.006692  
99.7219829 100.078149 99.8726876 99.9648739  
99.9176902 99.9396428 99.7086197 99.930003  
99.816207 99.8649851 99.8701133 99.9539767  
100.020335 100.004212 99.8979156 100.124381  
99.8619397 100.050188 99.9852697 99.928096

|            |            |            |            |
|------------|------------|------------|------------|
| 99.8349356 | 100.042982 | 100.023712 | 100.220821 |
| 99.9581963 | 99.9454078 | 100.012042 | 100.099045 |
| 99.7960265 | 99.8897749 | 99.9591836 | 100.101361 |
| 99.956309  | 100.038225 | 100.023026 | 100.195621 |
| 99.9095599 | 100.108559 | 100.174565 | 100.167697 |
| 99.8050279 | 100.04154  | 100.036412 | 100.102042 |
| 99.9380159 | 100.094002 | 100.083607 | 99.8894111 |
| 100.093652 | 100.233805 | 99.7789835 | 99.9680068 |
| 99.9686496 | 100.091985 | 100.035211 | 100.06431  |
| 100.009156 | 100.088814 | 99.7324748 | 100.175325 |
| 99.8188203 | 99.9781246 | 99.7396828 | 99.8925441 |
| 100.166825 | 100.212907 | 99.7709174 | 100.167152 |
| 99.9587771 | 100.031596 | 99.8658228 | 100.019632 |
| 99.9457106 | 100.10928  | 99.7995778 | 100.026851 |
| 99.8816847 | 100.092849 | 99.9797779 | 99.9103881 |
| 99.854245  | 100.097606 | 99.7856767 | 100.070849 |
| 100.016996 | 100.153239 | 99.8852157 | 100.091553 |
| 99.9608096 | 100.138105 | 100.095106 | 100.069487 |
| 100.106864 | 100.079157 | 99.6645136 | 100.008735 |
| 100.162469 | 100.142285 | 99.92383   | 100.066081 |
| 100.188312 | 100.147762 | 99.5191523 | 100.159252 |
| 100.189909 | 100.377356 | 99.9250314 | 100.175598 |
| 100.340174 | 100.471615 | 100.013072 | 100.165926 |
| 100.249434 | 100.299095 | 100.163239 | 100.182817 |
| 100.118769 | 100.187685 | 99.9131897 | 100.022493 |
| 100.04429  | 100.144591 | 100.131489 | 100.139501 |
| 100.374873 | 100.308463 | 100.002088 | 100.131328 |
| 100.020335 | 100.021651 | 99.9133613 | 100.110896 |
| 100.058083 | 100.03664  | 99.8634201 | 100.061314 |
| 99.8079315 | 100.085787 | 100.182975 | 99.9531595 |
| 100.097282 | 100.179614 | 100.14745  | 100.122883 |
| 100.01656  | 100.085499 | 100.300191 | 100.05532  |
| 100.282681 | 100.467002 | 99.8275517 | 100.062812 |
| 99.9908626 | 100.080743 | 100.03092  | 100.065809 |
| 100.163776 | 100.170678 | 100.119304 | 100.195485 |
| 99.9448395 | 99.8746416 | 100.411057 | 99.9530232 |
| 100.00088  | 100.084634 | 100.322158 | 100.145086 |
| 99.8275313 | 99.8933781 | 100.21747  | 99.9429434 |
| 99.9178354 | 100.016751 | 99.9298367 | 100.356082 |
| 99.9724243 | 99.9859074 | 100.077086 | 99.9775418 |
| 99.9978314 | 100.169381 | 100.021653 | 100.114574 |
| 99.8795069 | 100.040964 | 99.9895601 | 99.8541316 |
| 100.014382 | 100.234094 | 99.7551285 | 100.152986 |
| 99.8323223 | 99.9366161 | 100.056492 | 99.9531595 |
| 99.9043333 | 100.067051 | 100.007409 | 99.8879128 |
| 99.882701  | 100.081608 | 99.8980872 | 99.9332722 |

|            |            |            |            |
|------------|------------|------------|------------|
| 99.8276765 | 100.104956 | 100.081548 | 100.036795 |
| 99.9841842 | 100.077284 | 99.9437378 | 99.9170626 |
| 99.9309019 | 99.992249  | 100.195503 | 100.014592 |
| 99.9827323 | 100.07296  | 100.055977 | 99.8850523 |
| 99.8025597 | 99.9134117 | 100.32765  | 99.8836901 |
| 99.9789576 | 99.9497316 | 99.9555796 | 99.8757897 |
| 99.8408882 | 100.066763 | 100.02766  | 99.9336808 |
| 99.9849101 | 99.9337336 | 99.9318961 | 100.006011 |
| 99.7331621 | 99.9605411 | 100.158433 | 99.9485282 |
| 100.023882 | 100.109335 | 100.046201 | 100.234673 |
| 99.9300604 | 100.143551 | 100.249666 | 100.327866 |
| 100.136758 | 100.168239 | 99.9939598 | 100.546451 |
| 100.056464 | 100.126227 | 100.296064 | 100.392541 |
| 100.407749 | 100.354336 | 99.9657772 | 100.432792 |
| 100.123376 | 100.226855 | 100.326653 | 100.298803 |
| 100.318582 | 100.44789  | 100.107034 | 100.492146 |
| 100.150431 | 100.389563 | 100.218906 | 100.334415 |
| 100.307382 | 100.328205 | 100.02747  | 100.311629 |
| 100.420404 | 100.172715 | 100.27802  | 100.098637 |
| 100.883109 | 100.4733   | 99.987086  | 100.233445 |
| 100.543026 | 100.117564 | 100.092427 | 99.928353  |
| 100.674521 | 99.9681381 | 99.8740117 | 100.210113 |
| 100.262726 | 99.8187119 | 100.266335 | 100.346013 |
| 100.285563 | 100.161165 | 100.070087 | 100.516706 |
| 100.16265  | 99.9987452 | 100.313764 | 100.330458 |
| 100.289199 | 99.7948903 | 100.012175 | 100.255004 |
| 100.200178 | 99.915875  | 100.076102 | 100.329776 |
| 99.9575522 | 99.703069  | 99.9355324 | 100.047197 |
| 100.191596 | 99.9443165 | 99.8145531 | 100.410961 |
| 99.8439485 | 99.8100495 | 100.044482 | 100.201244 |
| 100.213851 | 100.014482 | 100.136248 | 100.420649 |
| 99.9363152 | 99.9054801 | 100.51637  | 100.145574 |
| 100.238143 | 99.8123595 | 100.222342 | 100.095908 |
| 100.059956 | 99.7886823 | 100.247432 | 100.110235 |
| 100.147813 | 99.653549  | 99.7645461 | 100.081172 |
| 99.8350755 | 99.645031  | 100.102394 | 99.9983496 |
| 99.9891169 | 99.6565809 | 99.7819025 | 99.9287624 |
| 99.9767528 | 99.9200618 | 100.02936  | 100.16495  |
| 100.079302 | 99.9409959 | 99.9102711 | 100.064935 |
| 100.246289 | 100.012172 | 100.032969 | 100.266602 |
| 99.97268   | 99.8623126 | 100.203783 | 100.171226 |
| 100.342583 | 100.09331  | 100.031938 | 100.193467 |
| 100.149413 | 99.9945584 | 99.9183478 | 99.9503208 |
| 100.155086 | 100.035849 | 99.5880608 | 100.100274 |
| 100.06621  | 100.305249 | 99.9872578 | 100.261962 |
| 100.249925 | 100.278973 | 99.8343154 | 100.185144 |

100.193487 100.130847 99.9851957 100.202336  
100.110866 100.044656 100.264273 100.059204  
100.228252 100.208519 100.150683 100.178185  
99.7501273 99.9470596 100.274412 99.8361158  
100.069265 99.8753062 99.9833054 100.026867  
99.8022017 99.8380579 99.9496237 99.8252002  
100.0153 99.8045633 99.8704029 99.8965612  
99.8275116 99.7811749 100.059605 99.8324318  
100.095302 99.9668387 99.6629854 100.042831  
99.8151476 99.9246818 99.9429217 99.9119796  
100.017481 100.030219 99.5870297 100.028504  
99.9505702 100.110057 99.6770768 100.10505  
100.09312 100.070066 99.6141813 99.9957571  
99.8388575 99.7758331 99.9585596 99.8200153  
99.8131112 99.9106776 99.9100992 99.8187872  
99.6768159 99.8911872 100.192441 99.9593262  
99.997699 100.046388 99.9226439 99.96724  
99.9608978 99.8530727 99.9712762 99.9402238  
99.7574003 99.8692425 100.063042 99.8853727  
100.0345 99.9752124 99.8327688 100.03096  
99.8212569 99.8383466 99.8757301 99.9224859  
100.073338 100.11049 99.9595907 100.108461  
99.896023 100.143696 100.016472 100.016497  
100.330364 100.180078 99.9860549 100.120059  
99.9757346 100.16463 100.353632 99.8669525  
100.082793 100.119297 100.03211 99.9164823  
99.7704916 99.9583207 100.164259 99.8898754  
99.8907864 100.000766 99.7794967 99.8531715  
99.7352905 99.9857516 100.147933 99.954687  
99.7883831 99.8937859 99.8021803 99.8812793  
99.6403056 99.8533614 99.9583878 99.9604177  
99.6669247 100.002643 99.9384537 99.9636924  
100.102575 100.435185 100.005817 100.065617  
99.7873649 100.202311 100.153261 99.7492  
99.8899137 100.140231 100.121985 99.8966977  
99.6859798 99.9294461 100.237809 99.6051135  
100.265489 100.069055 99.9589033 99.9156636  
99.8881682 99.8448434 100.310327 99.6655589  
99.9880986 99.9422953 99.9917258 99.7352826  
99.9107143 99.9925371 100.210657 99.7887692  
100.151449 99.971603 99.705775 99.9317642  
99.9318059 100.084647 99.9716199 99.8624498  
100.0425 100.147305 99.8549368 99.9287624  
99.8040927 99.9607751 99.934845 99.7882234  
99.8061291 99.9915265 99.8432513 99.8560369  
99.8731859 100.003509 100.102051 99.9092506



99.9575522 99.9233824 99.645629 99.8284749  
99.885259 100.039892 99.7695296 99.8376167  
99.8785678 100.017225 99.7889482 99.8979257  
99.9480974 100.141097 99.8023521 99.8743206  
99.8161658 100.053607 100.268741 99.9282166  
99.8064201 100.056206 100.241589 99.9602813  
99.6101955 99.9454715 100.33387 99.7970924  
99.7710735 99.9184737 99.9886326 99.816877  
99.6209595 99.889166 100.050841 99.7758069  
99.845985 99.9051914 99.6909962 99.6987152  
99.7322358 99.9173187 100.152573 99.6706074  
99.7520183 99.8626013 99.845829 99.7010347  
99.7147807 99.8962403 99.923675 99.9291717  
99.5831401 99.8660663 100.044654 99.8250637  
100.080902 100.170838 99.8879312 99.9838864  
99.9290422 100.19798 99.9580441 99.8919221  
100.071156 100.215305 99.8908525 99.8819615  
99.6612251 99.6332679 100.467302 99.8080598  
99.7281353 99.7284379 100.088219 99.8866546  
99.8141625 100.052709 99.5486167 99.8539546  
100.106266 100.158105 99.6336801 100.193002  
99.9734183 99.9214169 99.6863193 99.9585086  
99.6242869 99.8356485 99.9457127 99.889523  
99.8757263 99.7800639 101.178832 99.8442019  
99.9641837 100.196536 99.315643 99.9329796  
99.8093022 99.9821146 99.4943762 100.024482  
99.8452684 99.7134284 99.6755113 99.9236572  
100.008412 100.202639 99.2385855 100.13004  
100.019591 100.242389 99.6376831 100.078982  
99.6199126 99.8470293 100.072607 100.127746  
99.4080036 99.6999034 100.436679 100.263278  
99.4391095 99.6472877 101.445031 99.9397204  
99.6568509 99.9426941 100.983887 100.059047  
99.7605372 99.8598945 100.910232 100.20591  
99.4784779 99.7175519 100.767926 100.066648  
99.544902 99.5992904 98.9631802 99.6898808  
99.5905888 99.730747 99.8274245 99.7164137  
99.6968673 99.8387823 99.6370826 99.7039361  
99.5095838 99.635742 100.154268 99.9037217  
99.3712274 99.7820432 100.741706 99.8849335  
99.4971091 99.6563594 99.8460384 99.8364572  
99.4702154 99.5489839 99.6773126 99.6243373  
99.9265974 100.282469 99.5037832 100.039828  
99.8336037 100.035555 100.142059 100.281063  
99.4977571 99.5999501 101.716833 99.9943639  
99.5892927 99.6319484 101.089966 100.184397

99.7547049 99.7873212 100.487317 100.196301  
100.42413 100.238925 99.2061614 99.9976625  
100.795619 100.766566 99.3768886 100.18999  
100.437253 100.332941 99.0546484 99.6191742  
100.368885 100.390999 99.9012796 99.8004585  
100.45718 100.339868 100.850988 99.7813835  
100.365806 100.193237 99.7573723 99.7268834  
100.208171 100.195216 99.5400103 99.7565716  
100.15811 100.012299 100.091621 99.877619  
99.8026598 99.8237728 100.1965 99.9597994  
99.8754023 99.9544048 101.450835 99.963098  
100.003228 100.027968 100.31759 99.9646757  
99.9907534 100.073656 99.1509202 99.8473572  
100.356896 100.350589 99.4923747 100.191281  
100.212869 100.210061 100.14266 99.7382137  
100.403717 100.464562 101.811704 99.6921755  
100.283667 100.288902 100.077411 99.7029321  
100.277511 100.322055 99.1737372 99.7554242  
100.471437 100.221277 99.6338802 100.077692  
100.517448 100.327333 99.3860955 99.9781573  
100.369533 100.352898 99.8898711 100.005264  
99.9555972 99.942859 100.77353 99.9956546  
100.006468 100.166682 100.554767 100.13549  
100.117445 99.9172934 99.2509948 100.050442  
100.225992 100.110767 99.3955025 100.076544  
100.151791 100.299458 99.4891724 100.001822  
99.9627256 100.114066 100.071006 99.960373  
99.5487903 99.6352471 101.338551 99.8529506  
99.8013637 99.8471942 100.47891 99.8657151  
99.7963414 99.8115673 99.1559239 100.171776  
99.9078043 99.8387823 99.2696087 100.207344  
100.074837 100.063265 99.4885719 100.443129  
99.919955 99.9172934 100.118241 99.8003151  
99.9802227 100.066234 101.730043 99.7389308  
99.9960997 100.072336 99.9258979 99.8330151  
100.118903 99.9280145 98.7083903 100.022618  
99.983949 99.8783678 99.6162671 100.082855  
100.172205 100.054193 99.4985794 100.138789  
100.422672 100.253935 100.111036 100.21724  
99.8410562 99.5908785 100.245136 99.952198  
99.8757263 99.7592815 99.0400375 99.9547796  
99.7926152 99.5526125 99.659099 99.6888768  
99.9552732 99.7373446 100.014964 99.9002796  
100.205417 100.17097 100.85459 99.9879099  
99.9983678 99.7978773 100.286767 99.8466401  
100.164914 99.9468176 99.5320043 99.9236572

|            |            |            |            |
|------------|------------|------------|------------|
| 100.284963 | 100.253935 | 99.5199953 | 100.18368  |
| 99.9722842 | 100.033081 | 99.4667556 | 100.041836 |
| 99.9257874 | 99.6286496 | 101.011707 | 99.9864757 |
| 99.8018498 | 99.6830796 | 100.817162 | 100.006124 |
| 100.202014 | 99.9887122 | 100.390644 | 100.157864 |
| 100.096222 | 100.121488 | 99.3698834 | 99.8209677 |
| 99.8757263 | 99.8339991 | 99.5432126 | 100.411719 |
| 100.268276 | 100.102026 | 99.7579728 | 100.246355 |
| 99.9265974 | 99.9829393 | 99.5936502 | 100.476976 |
| 99.9834629 | 100.106974 | 99.7451632 | 100.334702 |
| 100.066412 | 100.093119 | 99.6556965 | 100.617385 |
| 100.030446 | 99.9900317 | 99.9741339 | 100.191568 |
| 99.9379381 | 99.8351536 | 101.259292 | 99.8529506 |
| 100.172529 | 100.159754 | 100.97488  | 99.8814914 |
| 99.8721621 | 100.091304 | 99.1769396 | 99.8890927 |
| 100.138182 | 99.978321  | 99.711338  | 100.046139 |
| 100.099462 | 99.9370862 | 99.6010558 | 100.012865 |
| 100.326114 | 100.120004 | 99.4435383 | 99.9352743 |
| 100.273785 | 100.137487 | 100.37063  | 100.195871 |
| 100.39837  | 100.275707 | 100.476108 | 100.033231 |
| 99.9619156 | 100.031596 | 99.1725363 | 100.103364 |
| 99.8788045 | 99.9095413 | 99.4445391 | 100.187409 |
| 100.152277 | 100.156785 | 99.7297517 | 99.9728507 |
| 100.408577 | 100.254759 | 99.7473648 | 100.151123 |
| 100.021211 | 99.972878  | 99.9919472 | 100.135203 |
| 100.364809 | 100.138373 | 100.889992 | 99.9506214 |
| 100.670694 | 100.403663 | 100.064588 | 99.9405928 |
| 100.546092 | 100.303372 | 98.8876372 | 99.8978999 |
| 100.566289 | 100.245945 | 99.4194534 | 99.764377  |
| 100.571013 | 100.283844 | 100.014424 | 99.8109381 |
| 100.714183 | 100.360137 | 100.328597 | 100.013515 |
| 100.324904 | 99.991081  | 98.9939604 | 100.193312 |
| 100.568244 | 100.066216 | 100.132938 | 100.161794 |
| 101.022674 | 100.462745 | 99.5845342 | 100.202624 |
| 100.914686 | 100.475157 | 100.846823 | 100.258354 |
| 100.540555 | 100.143503 | 100.367569 | 99.968816  |
| 100.689914 | 100.159225 | 98.6420144 | 99.7947492 |
| 100.840088 | 100.43428  | 99.6019217 | 99.7884455 |
| 100.504559 | 99.8692759 | 100.701328 | 99.8526282 |
| 100.152253 | 99.7852039 | 99.7524131 | 99.8077863 |
| 100.475729 | 100.268949 | 99.117871  | 99.7815688 |
| 100.86794  | 100.493031 | 99.3179266 | 99.8246915 |
| 100.695452 | 100.440237 | 99.9324831 | 100.052339 |
| 100.464002 | 100.216818 | 100.602799 | 100.048758 |
| 100.653592 | 100.254551 | 99.289747  | 99.8053508 |
| 100.456509 | 100.128277 | 99.2493761 | 99.8603645 |

99.8326854 99.8398176 99.5143849 100.096179  
99.192085 99.5194172 99.758009 100.116522  
99.3543118 99.6160669 99.4128581 100.236435  
99.2505583 99.6326165 99.8135689 100.164516  
98.9034646 99.3655058 101.07266 100.210504  
99.4588797 99.5732034 100.141332 99.9602201  
99.4145768 99.7322451 98.7115642 99.9821396  
99.5061144 99.484663 100.038607 100.083285  
99.9870941 100.034772 99.6484881 100.158642  
100.026022 100.144496 100.015423 100.074402  
99.66997 99.9207452 100.013225 99.990449  
99.540156 100.047019 99.6938553 100.203197  
99.5528605 99.7732882 101.265521 100.200619  
99.3508913 99.7186744 100.677745 100.099187  
99.5671938 99.7979471 99.2291907 99.7477583  
99.9014201 99.9033681 99.4858055 99.7298501  
99.6077505 99.5871051 99.5809368 99.8493331  
99.590974 99.5369597 100.316006 99.9805637  
100.018367 100.300393 100.514463 100.012225  
100.051105 100.164024 100.07478 100.082425  
99.8515793 99.8600081 99.1928169 99.8109381  
99.6452125 99.7898378 99.2641654 100.073256  
99.7867537 99.5842916 99.8631332 99.9524838  
100.12098 100.005479 99.6462897 99.9910221  
99.9737381 100.060589 99.8113705 100.217524  
100.079935 100.02418 99.5095883 100.292595  
100.055014 100.071843 100.136936 100.075262  
99.6033528 99.7511117 101.858693 100.107496  
100.173101 100.584384 99.8399499 100.129702  
100.379305 100.483597 98.4753347 100.322967  
100.154044 100.261502 99.4014663 100.05893  
100.223268 100.163362 99.3596965 100.078843  
100.30943 100.28947 99.5993236 99.9466099  
99.8812232 100.450002 99.8931115 99.8708228  
99.5546521 100.020539 99.9106989 99.8378719  
99.577618 99.5252095 99.2323884 99.7115122  
99.872102 99.9316679 99.9094997 99.8352931  
100.200302 100.225589 100.99032 99.8566396  
100.058109 99.9569888 99.9260877 99.8755506  
99.9533783 99.9708905 99.0199417 99.966094  
99.8735679 99.8702689 100.000434 99.8851493  
100.119351 100.385293 100.021419 100.032139  
100.235809 100.275734 100.82344 100.117238  
100.193461 99.9922395 100.876802 99.9364381  
99.8149317 99.7711367 100.587411 100.098901  
99.6544965 99.6648882 101.096843 100.078414

|            |            |            |            |
|------------|------------|------------|------------|
| 100.060878 | 100.308999 | 101.106036 | 100.05893  |
| 100.024882 | 100.296421 | 101.370845 | 100.009503 |
| 99.7352842 | 99.8557052 | 101.134016 | 99.857929  |
| 99.880083  | 99.8967482 | 101.021497 | 100.1638   |
| 99.810534  | 99.9856196 | 101.122624 | 100.141737 |
| 99.8348028 | 99.9662566 | 100.917772 | 100.474111 |
| 99.9737381 | 99.9005546 | 101.187378 | 100.233283 |
| 99.9611964 | 99.9702285 | 101.21136  | 99.9139455 |
| 99.7602046 | 99.7583935 | 100.891591 | 99.6169574 |
| 100.464002 | 100.173458 | 99.302138  | 99.6097942 |
| 100.256169 | 100.037089 | 99.2879483 | 99.8832869 |
| 99.8888785 | 100.082435 | 99.5247774 | 99.8764101 |
| 100.26301  | 100.252896 | 99.6880595 | 100.023543 |
| 100.176033 | 100.061086 | 99.6792659 | 99.8576424 |
| 100.210237 | 99.990088  | 99.7761959 | 100.040019 |
| 99.7615076 | 100.032621 | 101.091247 | 99.9606499 |
| 99.49455   | 99.8039049 | 101.659437 | 100.096035 |
| 99.886761  | 100.190504 | 99.686061  | 99.8335739 |
| 100.243953 | 100.232043 | 98.853262  | 100.169244 |
| 99.7432652 | 99.7888448 | 99.5215797 | 100.079846 |
| 99.8323597 | 99.7049383 | 99.4156561 | 99.8516253 |
| 99.9875827 | 99.9422597 | 99.990841  | 100.147038 |
| 99.815909  | 99.7669993 | 101.163795 | 100.259214 |
| 100.026674 | 100.015243 | 100.28383  | 99.8388747 |
| 99.9646169 | 99.8523953 | 98.768723  | 99.8587886 |
| 100.137919 | 99.7502842 | 99.9358807 | 99.8610808 |
| 100.228643 | 100.084421 | 99.0501199 | 99.7940328 |
| 100.175056 | 100.093358 | 99.3061351 | 100.083285 |
| 99.9072837 | 99.8520643 | 99.7855891 | 99.8358662 |
| 100.064787 | 100.338457 | 99.4760125 | 99.8573559 |
| 100.194438 | 100.177595 | 100.246656 | 100.096608 |
| 99.9424654 | 99.9871091 | 101.18438  | 100.076265 |
| 99.1904716 | 99.6525257 | 99.5622038 | 100.202789 |
| 99.3751459 | 99.5596832 | 99.6086563 | 100.245804 |
| 99.4230124 | 99.7597152 | 99.6342853 | 100.296131 |
| 99.5489855 | 99.7277232 | 99.849729  | 100.534292 |
| 99.4666745 | 99.7760409 | 100.526294 | 100.649286 |
| 99.4061944 | 99.6091552 | 100.978606 | 100.483391 |
| 99.4993401 | 99.5831    | 99.802876  | 100.311043 |
| 99.1595847 | 99.3766366 | 99.4016222 | 100.611002 |
| 99.1665383 | 99.3128177 | 99.9604542 | 100.517659 |
| 99.4225273 | 99.5410487 | 99.494327  | 100.615734 |
| 99.7116671 | 99.5207652 | 99.6599143 | 100.619892 |
| 99.6785163 | 99.774062  | 99.7668352 | 100.561535 |
| 99.5805192 | 99.8393651 | 99.9430345 | 100.476652 |
| 99.9563362 | 99.9295692 | 101.09754  | 100.113747 |

99.1849734 99.8152887 101.854997 99.9679258  
98.7118062 99.5977767 102.233024 99.9279217  
99.0334499 99.4797034 101.365643 99.8007402  
99.7292936 99.800612 99.1080902 99.7225961  
99.7474053 99.7880791 99.265268 100.199061  
100.169633 100.242232 99.6907492 100.008934  
100.737402 100.625806 99.6479007 100.36897  
100.701664 100.30836 99.5656077 99.7810967  
100.622425 100.428907 99.6965558 99.8740094  
100.406217 100.363439 100.750948 99.8258324  
100.291725 100.264825 101.29156 99.7531368  
99.9270665 100.049951 100.367314 99.6890442  
100.408481 100.198862 99.2460462 99.7043863  
100.895717 100.714196 99.7103714 99.8031778  
100.400072 100.172807 100.176298 99.7148533  
100.284125 100.170003 100.564738 99.6867501  
100.104302 100.108658 99.7151768 99.7590155  
100.339754 100.177424 99.3019094 99.7777988  
100.111903 100.06908 100.083593 99.8606747  
99.5460747 99.2280556 100.570144 99.7562913  
99.6992153 99.5112006 98.99296 99.7334932  
99.9493827 99.8797673 99.636688 99.851068  
99.9448547 99.9780518 100.719312 99.9822642  
99.7938164 99.6831984 100.543313 99.9376718  
100.222351 99.975908 99.4188417 100.088081  
100.418345 100.478709 100.241372 100.134968  
100.55014 100.614262 101.240101 99.9748082  
100.172868 99.9696415 100.014716 99.6932024  
100.02474 99.7704341 99.6200692 99.926918  
99.9227003 99.8304602 100.387737 99.980687  
99.9456633 99.7676307 100.321463 100.032018  
99.955366 99.7377825 99.3701866 100.074173  
100.293019 99.8654204 99.6737299 100.059978  
100.107051 99.7862652 100.10682 100.012231  
100.318246 100.050446 100.916936 99.8593842  
100.098157 99.9816797 99.6629177 100.065857  
100.178528 99.9834937 99.3373495 99.9468484  
100.109153 100.18534 99.5435827 99.7545706  
100.093791 100.06974 100.114829 99.9667787  
99.9757416 99.873171 100.693283 100.07446  
100.320348 100.004107 100.579955 99.9339438  
99.7039049 99.8141344 99.0075765 100.202502  
99.9414588 99.8596487 99.6114595 100.137836  
99.9265814 99.8913108 99.3357477 100.185152  
99.74029 99.7710937 99.8919768 100.072309  
99.9927213 100.336559 100.969195 100.062416

99.8798468 99.8103415 100.257991 99.9143002  
100.195346 100.143618 99.6895478 100.08292  
100.471225 100.584084 99.3635792 100.040908  
99.949221 100.3359 100.351697 100.231179  
99.6424546 99.8171027 100.308848 99.7789459  
100.220734 100.02604 99.0854646 100.067578  
99.9729925 100.186659 99.8271034 100.218417  
100.037839 100.117893 99.5898351 100.0736  
99.9197895 100.251467 101.032667 100.12192  
100.008731 99.9646943 100.537507 99.9111458  
99.729617 99.9839884 99.2306288 99.9885731  
99.9909425 99.9554595 99.4897218 99.9687861  
99.8358613 99.9518316 100.2658 100.077328  
99.652319 99.7265689 100.20473 100.092096  
99.5953966 99.9275903 98.8415888 100.145292  
100.198418 100.065782 99.6264765 99.7858283  
100.499201 100.513339 100.667454 99.8965206  
100.328919 100.228215 99.8667482 100.034456  
100.448262 100.473102 99.4436697 100.409548  
99.6773843 99.9007105 100.036741 100.268028  
99.7786155 99.7979735 100.258191 100.410838  
99.7731174 99.8840549 99.465094 100.404099  
100.13244 99.864431 99.581826 100.131814  
100.031855 100.178414 99.9334237 100.042055  
99.9471187 99.9524912 101.317589 99.8046116  
99.855105 99.988276 100.392343 99.829417  
99.699377 99.6178953 99.2284263 99.8764469  
99.7359238 99.7024925 99.637489 99.9005354  
99.8502536 99.7552627 99.5658079 99.8949434  
100.157505 100.245036 99.4883202 99.9196054  
100.535101 100.358492 100.171293 99.8037513  
100.130661 100.336724 101.031666 99.9626206  
100.137453 100.277193 99.9326227 99.6109  
100.090071 100.128612 99.4406663 99.8109205  
100.099289 99.917531 99.8048783 99.7896997  
100.030562 99.938639 99.5806246 100.004919  
100.017463 99.7677956 100.175698 99.7965821  
100.16931 100.294178 100.933154 99.6725551  
100.086352 100.245201 99.8415197 99.6589336  
100.387782 100.379765 99.5856303 100.003628  
100.173191 100.254271 99.6312819 100.010654  
100.497559 100.403564 100.069949 100.227826  
100.309082 100.218886 101.131603 100.316443  
100.372937 100.012073 100.020137 100.327914  
100.173574 100.062124 99.4129914 99.8451094  
100.401533 100.42669 99.720265 99.6912485

|            |            |            |            |
|------------|------------|------------|------------|
| 100.734293 | 100.696109 | 100.278799 | 99.9403225 |
| 100.812283 | 100.456424 | 99.8807034 | 100.088017 |
| 100.031729 | 99.9567352 | 99.5802315 | 100.270557 |
| 100.14579  | 100.068566 | 99.5710293 | 100.297802 |
| 99.6630611 | 99.9151083 | 99.7042611 | 100.356163 |
| 99.1616473 | 99.5956379 | 99.845695  | 100.220226 |
| 98.958872  | 99.4471354 | 100.763315 | 99.9256964 |
| 99.5975816 | 99.7324122 | 101.589112 | 99.9636956 |
| 99.348012  | 99.7023483 | 100.07475  | 100.051165 |
| 98.9174396 | 99.5715207 | 98.9324764 | 99.9920874 |
| 99.1795201 | 99.5774674 | 99.3921865 | 99.9922308 |
| 99.3238025 | 99.4907446 | 99.2751584 | 99.9084892 |
| 99.2872444 | 99.5875438 | 100.32421  | 99.8638939 |
| 99.5228407 | 99.8574582 | 101.110998 | 100.069663 |
| 99.6702102 | 99.8686909 | 100.57627  | 100.253063 |
| 99.4399758 | 99.6668332 | 99.3995882 | 100.128311 |
| 99.6256906 | 99.6924371 | 99.5648278 | 99.9788953 |
| 99.6497377 | 99.6636947 | 100.113159 | 99.9624051 |
| 99.4526493 | 99.768588  | 99.6140395 | 99.9589636 |
| 99.9240042 | 99.9070141 | 100.206181 | 100.142364 |
| 100.418594 | 100.204184 | 101.090793 | 99.9946685 |
| 100.652403 | 100.631191 | 100.739309 | 100.007717 |
| 100.28276  | 100.466005 | 99.2725578 | 100.01331  |
| 99.9033692 | 100.480706 | 99.3411742 | 100.098629 |
| 100.010281 | 100.379447 | 99.4680046 | 99.8828218 |
| 100.160738 | 100.281987 | 99.5148158 | 99.9013196 |
| 100.376836 | 100.217069 | 99.628643  | 99.8940065 |
| 100.419081 | 100.540173 | 99.708062  | 100.163729 |
| 100.537042 | 100.627392 | 100.164371 | 100.106515 |
| 100.390322 | 100.662907 | 101.191017 | 100.240014 |
| 99.6635485 | 100.108707 | 99.9647235 | 99.86246   |
| 99.6815838 | 99.9312965 | 99.3805837 | 99.9859215 |
| 100.037578 | 100.078147 | 99.4435988 | 99.9413263 |
| 99.9327782 | 100.174946 | 99.7408699 | 100.062924 |
| 99.9651117 | 99.9499626 | 101.050783 | 99.807397  |
| 99.782809  | 99.8437478 | 100.054545 | 99.8488376 |
| 100.319806 | 100.206332 | 99.4271948 | 99.7510435 |
| 100.582211 | 100.650353 | 99.8502961 | 99.9833405 |
| 100.41242  | 100.547772 | 100.212583 | 99.8109818 |
| 100.157163 | 100.252584 | 100.774917 | 99.7689676 |
| 100.285685 | 100.048248 | 99.369581  | 99.8968744 |
| 100.329067 | 100.168339 | 99.4481999 | 100.169752 |
| 100.065199 | 99.9550834 | 99.887505  | 100.099776 |
| 100.22508  | 100.127538 | 100.720904 | 100.189683 |
| 100.084697 | 100.172964 | 99.1181209 | 99.9301416 |
| 99.9482138 | 99.995554  | 99.0639079 | 99.7751335 |



|            |            |            |            |
|------------|------------|------------|------------|
| 99.6882455 | 99.581597  | 100.736108 | 99.7004257 |
| 99.9946831 | 99.4496132 | 101.434875 | 99.6721772 |
| 100.077386 | 100.029087 | 99.5358208 | 99.7942048 |
| 99.9532507 | 99.9362521 | 100.383024 | 99.9694313 |
| 100.435979 | 100.05816  | 99.4085904 | 100.01331  |
| 100.792623 | 100.09351  | 100.041142 | 100.267546 |
| 100.104845 | 100.043293 | 101.236028 | 100.127737 |
| 99.762174  | 99.6045579 | 99.6198409 | 100.141933 |
| 99.761849  | 99.4499435 | 99.8028847 | 100.12573  |
| 99.9371651 | 99.655105  | 99.7152638 | 100.035679 |
| 100.423306 | 99.9063534 | 99.9955308 | 99.8310569 |
| 100.639242 | 100.243664 | 100.78392  | 99.7701148 |
| 100.425418 | 100.078478 | 100.435636 | 99.8185817 |
| 100.034816 | 99.8954511 | 99.595235  | 99.8008009 |
| 99.9210796 | 99.8245862 | 99.3675806 | 99.875939  |
| 99.9764853 | 99.7259699 | 100.005533 | 100.099202 |
| 100.101758 | 99.9331136 | 100.40983  | 100.059482 |
| 99.581496  | 99.6927675 | 101.155809 | 100.016751 |
| 99.9769728 | 99.7167195 | 100.405029 | 99.7064482 |
| 100.040015 | 100.056343 | 98.9344769 | 99.875222  |
| 100.090709 | 100.323779 | 99.5350206 | 99.9920874 |
| 100.094446 | 100.213765 | 99.6178405 | 100.107232 |
| 100.069424 | 100.111184 | 101.422872 | 100.26898  |
| 100.154564 | 100.245151 | 100.100356 | 99.9061949 |
| 100.028479 | 100.126051 | 99.6782549 | 99.8532828 |
| 100.029129 | 99.9134564 | 99.6322439 | 99.6645774 |
| 99.8422767 | 99.753556  | 100.168972 | 99.7950652 |
| 99.8980074 | 99.7941919 | 100.652688 | 99.7527642 |
| 99.8279784 | 99.7163891 | 99.3929866 | 99.7937747 |
| 99.91783   | 99.6349522 | 100.362019 | 99.9245492 |
| 100.005082 | 99.8159965 | 100.03314  | 100.137632 |
| 99.8081559 | 99.5668955 | 100.166772 | 100.413377 |
| 99.9426894 | 99.8401137 | 99.5972355 | 99.8935763 |
| 100.001832 | 99.9374084 | 99.7064617 | 100.074108 |
| 100.09867  | 99.9798613 | 99.5848326 | 100.144084 |
| 100.34889  | 100.206167 | 99.8042851 | 100.228399 |
| 100.366763 | 100.130181 | 101.992409 | 100.431874 |
| 99.9745356 | 99.8470515 | 101.067988 | 100.130605 |
| 100.765002 | 100.24003  | 100.046543 | 99.924836  |
| 100.504546 | 100.227476 | 99.2497524 | 99.8922858 |
| 100.069261 | 100.196586 | 99.7402698 | 99.8418114 |
| 100.100295 | 100.155289 | 99.6236418 | 99.8005141 |
| 99.9140929 | 99.9977014 | 99.6388455 | 99.874505  |
| 99.8372398 | 99.8239254 | 100.20038  | 99.5828433 |
| 99.7316277 | 99.911309  | 99.6194408 | 99.8174345 |
| 100.064062 | 100.11168  | 99.6178405 | 100.406064 |

100.141565 100.275049 99.5896337 100.482779  
100.177798 100.322623 99.8705009 100.42112  
100.229792 100.378621 100.139365 100.130892  
99.8578906 99.8498623 100.114877 100.192314  
99.7235557 99.4527389 100.287155 99.9363116  
99.7811917 99.6695318 99.8793157 99.9836196  
99.8788898 99.77522 99.8898942 100.000237  
99.7817874 99.9439248 99.4595753 100.036167  
99.648495 99.6770621 99.6411102 99.8970879  
99.7094074 99.7316236 99.8262342 100.12734  
99.6732174 99.7958292 99.7797643 99.986015  
99.6627923 99.7316236 100.130744 99.8452887  
99.7243004 99.6548676 100.067273 99.9381082  
99.7021098 99.7332089 100.342126 99.8933452  
99.6930251 99.6992566 99.6586781 99.8858598  
99.8205092 99.6729667 99.9146404 99.8367553  
99.7899785 99.6317483 99.8863051 99.9493363  
99.7671922 99.8247614 99.6717123 100.083625  
99.7601925 99.693708 99.7627631 99.9352637  
99.957227 99.8386329 99.8436132 100.043653  
99.6306234 99.6811575 99.8097997 99.8186405  
99.6958548 100.074186 99.6458328 100.206386  
99.7240025 99.8810403 100.048572 100.051438  
99.7412784 100.069958 99.7756085 100.107878  
99.6021778 99.8268751 100.053672 99.8979862  
99.5808808 99.7905448 99.92503 99.9199934  
99.4245042 99.7181484 100.201394 99.8620561  
99.5692642 99.708108 99.676246 99.9863144  
99.499416 99.599117 99.6076746 100.028682  
99.5689664 99.6341262 99.5289024 99.8002264  
99.8672732 99.738097 99.8162224 99.950534  
99.9435254 99.5956822 100.013058 99.6921366  
100.239747 99.7495906 100.208383 99.930473  
100.140858 99.6890841 100.018914 99.7210304  
100.181813 99.8180237 99.9373086 99.8367553  
100.14756 99.9168422 100.048005 99.8681941  
99.9704817 99.7419282 99.9560099 99.8526244  
100.146964 99.8890991 99.9193629 99.8976868  
99.9893959 99.5849812 100.157946 99.6861482  
100.06535 99.7988677 99.7903428 99.8919978  
100.013225 100.03125 99.78222 100.035269  
99.8683157 99.6700602 100.182692 99.8289704  
100.062967 99.8402183 99.9858565 99.8643017  
100.024841 99.9188239 99.9820784 99.8737334  
99.9387597 99.7503833 100.30189 99.9120588  
99.9022718 99.8250256 99.9569544 100.059073

|            |            |            |            |
|------------|------------|------------|------------|
| 100.030798 | 100.035081 | 99.9072732 | 100.005327 |
| 100.106604 | 100.136409 | 100.351949 | 99.965954  |
| 100.000566 | 100.061107 | 100.02137  | 99.9207419 |
| 99.9812047 | 99.9622881 | 100.200638 | 99.9562229 |
| 100.083966 | 100.045518 | 99.8940501 | 100.023292 |
| 100.171537 | 100.155169 | 99.9140737 | 100.088266 |
| 100.129241 | 100.064938 | 99.9401422 | 100.021197 |
| 100.160368 | 99.9818405 | 100.08503  | 99.8925967 |
| 100.131773 | 100.153452 | 99.9543098 | 100.068355 |
| 100.127752 | 100.166795 | 100.097875 | 100.202494 |
| 100.08769  | 99.996901  | 100.079174 | 100.054432 |
| 100.175707 | 100.316212 | 99.8392685 | 100.320764 |
| 100.001012 | 100.15649  | 99.8507915 | 100.125693 |
| 99.9071865 | 100.066787 | 100.166825 | 99.9834699 |
| 100.034671 | 100.000204 | 100.321913 | 100.008022 |
| 100.146219 | 100.113026 | 99.9027396 | 100.033922 |
| 100.0932   | 100.105099 | 99.9903901 | 100.116262 |
| 99.9983317 | 99.9473597 | 100.081252 | 100.169708 |
| 100.08203  | 100.129011 | 99.8812047 | 100.127041 |
| 100.162453 | 100.081716 | 100.206872 | 100.176145 |
| 100.036607 | 100.001129 | 99.9569544 | 100.124196 |
| 100.083222 | 100.296923 | 99.6212755 | 100.121801 |
| 100.083966 | 100.086208 | 100.076341 | 100.153689 |
| 100.078158 | 99.9102367 | 100.146234 | 100.000836 |
| 100.163942 | 100.254912 | 99.7202602 | 100.195607 |
| 100.124475 | 100.412388 | 100.036104 | 100.159977 |
| 99.9963956 | 100.106685 | 99.9968128 | 99.9529293 |
| 100.143538 | 99.9591175 | 99.9811339 | 100.090063 |
| 100.030054 | 100.206032 | 99.9248411 | 99.9686487 |
| 99.9494826 | 99.965723  | 100.098442 | 99.9930513 |
| 100.072946 | 100.043932 | 100.027037 | 100.012364 |
| 100.160219 | 100.335764 | 99.9025507 | 100.175696 |
| 100.091711 | 100.151074 | 100.221228 | 100.025089 |
| 100.054776 | 100.13958  | 100.081441 | 99.9872126 |
| 100.282937 | 100.190839 | 100.103542 | 100.202045 |
| 100.209514 | 100.147639 | 100.407675 | 99.931521  |
| 100.267597 | 100.373151 | 100.038938 | 99.9846676 |
| 100.149347 | 100.350032 | 99.9760336 | 100.139466 |
| 99.9683967 | 100.021738 | 100.173058 | 100.027933 |
| 100.206834 | 100.184762 | 100.077852 | 100.18932  |
| 100.273257 | 100.455059 | 99.9093511 | 100.047246 |
| 100.147411 | 100.216336 | 100.131122 | 100.068804 |
| 100.13773  | 100.123859 | 99.9414645 | 100.153839 |
| 100.013225 | 100.196388 | 99.9546876 | 100.041557 |
| 100.231407 | 100.062296 | 100.091831 | 100.073744 |
| 100.211748 | 100.279881 | 100.219339 | 99.9661037 |

|            |            |            |            |
|------------|------------|------------|------------|
| 100.33685  | 100.573562 | 100.206872 | 100.08093  |
| 100.220237 | 100.212769 | 100.23993  | 99.9990396 |
| 99.8921445 | 100.128219 | 100.009469 | 99.8433425 |
| 100.313468 | 100.3643   | 100.003424 | 100.088416 |
| 99.935781  | 99.896233  | 100.167769 | 99.8731345 |
| 99.9196966 | 99.9834258 | 100.078796 | 99.9250835 |
| 100.106306 | 100.179345 | 99.965455  | 100.021346 |
| 99.9770347 | 100.206956 | 100.1264   | 99.9069687 |
| 100.250619 | 100.461533 | 99.9136959 | 100.17345  |
| 100.189558 | 100.231397 | 100.320024 | 99.9969437 |
| 100.276831 | 100.06573  | 100.251642 | 99.9388567 |
| 100.269068 | 100.294903 | 99.7837716 | 100.053229 |
| 100.21888  | 100.176172 | 99.9650312 | 100.194444 |
| 100.111057 | 100.045806 | 100.080962 | 100.120317 |
| 100.127737 | 100.224696 | 99.7665897 | 100.002014 |
| 100.323575 | 100.149332 | 100.291676 | 99.9922806 |
| 100.330426 | 100.326636 | 99.9937306 | 99.9795518 |
| 100.358126 | 100.390761 | 100.077941 | 100.182763 |
| 100.286641 | 100.365904 | 100.038101 | 100.206723 |
| 100.119099 | 100.240959 | 99.9467164 | 100.050983 |
| 100.415909 | 100.431352 | 100.057927 | 100.362164 |
| 100.201605 | 100.209359 | 100.170648 | 100.109086 |
| 100.271302 | 100.099618 | 100.04471  | 100.081232 |
| 100.470565 | 100.426327 | 100.000528 | 100.285193 |
| 100.223646 | 100.334701 | 100.504656 | 100.031365 |
| 100.336532 | 100.182651 | 100.089458 | 99.9045268 |
| 100.305406 | 100.394728 | 99.950115  | 99.9487032 |
| 100.302725 | 100.438359 | 99.8870518 | 100.024327 |
| 100.205477 | 100.122359 | 99.8980029 | 99.9910826 |
| 100.141885 | 100.100147 | 100.001661 | 99.9786533 |
| 100.261026 | 100.194947 | 99.895926  | 100.014144 |
| 100.106441 | 99.8866157 | 100.256935 | 99.9022806 |
| 100.193265 | 99.9553688 | 100.083228 | 100.031665 |
| 100.103015 | 99.8806659 | 100.211431 | 99.813778  |
| 100.035701 | 100.07648  | 100.325473 | 99.8971891 |
| 99.9569187 | 100.294903 | 100.094934 | 100.068653 |
| 99.9747898 | 100.1689   | 100.194627 | 100.256291 |
| 99.7247426 | 100.125136 | 99.80152   | 100.081083 |
| 99.9901292 | 100.080579 | 100.117403 | 100.227389 |
| 99.7312954 | 99.6815463 | 100.202934 | 100.046341 |
| 99.8629462 | 99.8153504 | 99.8515552 | 99.9499012 |
| 99.8543085 | 99.5363715 | 100.6693   | 99.9010826 |
| 99.7892277 | 99.3945022 | 100.005626 | 99.8932955 |
| 100.045232 | 99.7066677 | 99.999395  | 99.8616982 |
| 99.9695774 | 99.8009387 | 100.31811  | 99.8718812 |
| 100.141736 | 99.9137203 | 100.104186 | 100.067006 |

100.005915 99.8431161 100.130431 99.8080875  
99.9968309 99.9145136 100.191606 99.8808663  
100.037041 99.925091 99.9289681 99.965625  
100.001299 99.8039797 100.140815 99.8925468  
99.8547553 99.6174209 99.8081284 99.8417814  
99.9408346 99.7304668 100.227858 99.8543604  
99.8824556 99.5900518 100.461796 99.7595684  
99.8443304 99.9379161 99.7747086 99.9641275  
99.8221404 99.7900969 100.148368 99.9338779  
99.8635419 99.7000568 100.111927 99.8994353  
99.9740452 99.7744952 99.8417369 99.972813  
99.7977165 99.7140718 100.137794 99.7188363  
99.8152898 100.086793 99.7835828 99.9940776  
99.8449261 100.079124 100.359837 100.007705  
99.8279485 100.155017 99.9136743 99.9398679  
100.022297 100.199839 99.8241774 99.9964736  
99.9068795 99.8759061 99.9839124 99.9747598  
99.8231829 99.9141169 99.7866038 99.8284536  
100.106143 100.0109 99.9861781 99.9380709  
99.9439621 99.6319648 100.17178 99.8901508  
99.8385223 99.6006292 100.125144 99.8742772  
99.9244528 99.3929156 100.22748 99.8582539  
100.071443 99.7520183 99.9087652 100.086324  
99.8870723 99.7444819 100.051507 99.8398346  
99.9680881 99.6110744 99.9299122 99.9139611  
99.9129854 99.9205956 99.7086244 100.077189  
99.5996446 99.7677522 100.005059 99.8205168  
99.9180489 99.7443497 99.8096389 99.9969229  
99.9232613 99.9812834 99.8925274 100.039302  
99.8425433 99.8531647 99.8981917 99.8007498  
100.058486 99.9420148 99.7516736 100.091715  
99.8954121 99.8804015 99.977304 99.9174054  
99.8231829 99.8584534 99.8168137 99.9340277  
100.043743 100.202087 100.015444 100.058021  
99.8587763 99.9249588 100.104186 99.6776549  
99.942175 100.023064 99.7122119 99.944061  
99.8797749 99.9672684 99.9114086 100.000816  
99.9457492 99.8942843 99.9287793 99.8453754  
99.7735905 99.8523713 100.076997 99.8799678  
99.8907954 99.7644467 100.037535 99.874427  
99.8540106 99.9298508 99.8513663 99.9912324  
99.7595914 99.8954743 99.971262 99.7459411  
99.8970503 100.008652 99.9595556 100.090667  
99.7938444 100.005479 100.22276 99.9021308  
100.068911 100.288292 100.029416 100.042896  
99.9591526 100.197591 100.042633 99.9404669

99.7872917 99.9282642 99.9125414 99.8363904  
100.113589 99.9738792 99.8481565 100.047688  
99.8173748 99.6680602 100.012989 99.9214486  
100.029446 100.011958 99.66482 100.204477  
99.9758323 99.9153069 100.160452 100.103395  
100.096909 100.116939 99.6025121 100.151915  
100.084102 100.226944 99.9004575 100.141282  
100.090654 100.174057 99.9285905 100.200584  
99.9768748 100.195476 100.264109 100.126158  
100.050444 100.247702 99.9138631 100.223046  
100.123269 100.405834 99.6752047 100.339402  
100.106292 100.358764 99.5989246 100.205376  
100.236602 100.620158 99.7156105 100.373545  
100.045977 100.413502 100.006947 100.097855  
100.218582 100.61249 99.6961628 100.338054  
100.080974 100.268989 99.971262 100.224544  
99.9534934 100.220729 99.6878551 100.006806  
100.19118 100.093139 99.9593668 100.111931  
99.8664242 99.6154277 99.7152504 99.9522174  
99.9626597 99.6828683 99.8803097 100.049089  
99.966527 99.4779067 99.8761549 100.061666  
99.8244792 99.4738154 99.8142104 100.127844  
99.8392046 99.3446091 99.8380061 100.022588  
99.8378659 99.6482901 99.8974955 100.126497  
99.5687932 99.6053973 100.366234 99.8358814  
99.9753027 99.6125242 99.9360219 99.965992  
99.9540327 99.6418232 100.22327 99.8647782  
99.8189758 99.6864317 99.7169501 99.9117918  
99.8630032 99.5312258 100.221004 99.9432339  
100.18354 99.3204572 100.006654 99.7685054  
100.089833 99.26793 100.560188 99.6657943  
99.9177399 99.1900631 100.396262 99.8872369  
99.8185296 99.5255508 100.00231 99.8200106  
99.8612183 99.6661072 100.019496 99.8539981  
100.050119 99.9476159 99.728848 100.192226  
99.8856118 99.9418089 100.06331 100.010909  
100.076447 100.086061 100.189465 100.036213  
100.31354 100.476319 99.8604799 100.252265  
100.132968 100.328504 100.234413 100.242683  
100.074959 100.210516 100.141685 100.077986  
100.145463 100.225825 100.035171 100.232352  
99.9576025 99.9893209 100.580017 99.9225719  
100.092362 100.063888 100.245366 99.9848573  
100.15052 100.451507 100.09466 100.236694  
100.053987 100.528186 100.166614 100.295536  
99.8469391 100.099654 99.8285634 100.047592

99.8824883 100.024427 99.8699226 100.013006  
100.013678 100.252353 99.7367799 100.291793  
99.8383121 100.045016 100.03857 100.095504  
100.040451 100.074051 100.146973 100.187584  
100.029444 100.038285 100.14093 100.017348  
99.9793187 99.9852296 100.375865 99.8731628  
100.147099 100.078934 100.12601 100.172163  
100.06306 100.375224 99.8752106 100.274724  
100.102476 100.401884 100.136019 100.315898  
100.039113 100.331671 100.039137 100.036213  
100.169707 100.413894 99.9764369 100.2063  
100.128209 100.245358 100.224592 99.9712324  
100.060234 100.111136 100.071431 99.8024928  
100.197671 100.147298 100.184933 100.176355  
99.9662295 100.080122 99.9226132 99.9860551  
100.055325 100.017168 99.6529282 100.113171  
99.9941928 100.010965 99.7297922 99.9847076  
99.8713327 100.006346 99.8767214 99.8674733  
99.9723279 99.9575142 100.067654 99.9574577  
100.037774 100.066528 99.7075073 100.159736  
99.8054404 99.8997079 100.030261 100.000429  
99.8671679 99.7932018 99.7316808 100.11407  
99.8313213 99.9247837 99.9303562 100.023935  
99.8225456 99.8342469 99.9441427 99.8207592  
99.878621 99.9070987 99.7896593 99.9863546  
99.8769848 99.9398292 100.028183 99.8212084  
100.05592 99.9465601 100.087295 99.9857557  
100.011596 100.088568 99.6580273 100.066008  
99.8002344 100.075238 100.005143 100.072296  
99.9735178 100.211836 99.7904147 100.197017  
100.027511 100.203785 100.112601 99.8930762  
100.1529 100.067848 100.011186 99.8674733  
100.16108 100.310291 99.5116647 100.002525  
100.08195 100.096091 100.151694 99.9288603  
100.16227 100.138192 100.209862 99.9622489  
100.086561 100.246546 99.9018391 99.9450306  
100.093552 99.9895849 100.09636 99.9791678  
100.048186 100.061645 99.8412167 100.084274  
99.8766873 100.078142 100.166047 99.7816811  
100.112293 100.171846 100.188143 100.057773  
99.9590899 100.301185 99.8795542 100.016449  
99.9471906 100.242058 99.7643527 100.045795  
100.177144 100.315966 99.6799345 100.1518  
100.055028 100.034325 100.123933 99.9164332  
100.027511 99.9604178 100.005898 99.9847076  
100.051756 99.899312 100.035926 100.094007

99.899296 99.7569079 100.082007 99.8453141  
100.021412 99.9024795 100.064254 100.054479  
99.8563098 99.7103197 100.405704 99.8286946  
100.004753 99.7875268 99.9940004 100.031422  
99.9973164 99.9781028 99.7354579 100.105386  
100.001184 99.8822869 100.223648 99.76596  
100.159147 100.092264 100.327896 100.011957  
100.066035 100.163796 99.799102 99.9947392  
100.011596 100.002387 99.9703935 99.944282  
100.071836 100.09939 99.8191206 100.029326  
100.069605 100.042772 100.039514 99.7972525  
100.14338 100.073655 99.9152478 99.9984823  
99.9927054 100.084345 100.165858 99.9688368  
100.011893 99.8803072 100.010997 99.8331864  
100.109467 100.034853 99.7809719 99.9083481  
99.8790672 99.8751601 100.073131 100.05942  
100.011893 99.9916965 99.3932526 100.198963  
99.8090101 99.7309083 99.8179875 99.9641953  
99.9956802 99.6795689 99.7753063 100.102241  
100.017248 99.9548747 99.665015 100.067056  
99.9001884 99.9069667 99.8905078 99.8981668  
100.093552 99.9436566 99.8767214 100.164826  
99.7697425 99.8628861 100.343004 99.7767402  
99.8827857 99.8553634 99.991923 99.6900497  
99.9579 99.8543076 99.9815359 99.9537146  
99.7746509 100.010833 99.8523591 99.7108614  
100.128357 100.04396 99.8126996 99.9454798  
100.034617 100.107704 100.10749 99.8126533  
100.08185 100.136931 99.9635671 99.925225  
100.390129 100.223553 100.342452 100.168482  
100.110905 100.146188 99.986421 99.8861543  
100.216992 100.177266 99.8298431 100.017438  
100.22027 100.203716 99.8936831 99.9125008  
100.360031 100.357122 99.717651 99.9604037  
100.460457 100.30105 100.140732 100.101717  
100.421121 100.292321 100.064993 99.9102554  
100.663542 100.411211 100.162642 100.042587  
100.499345 100.459085 100.375316 100.137495  
100.425442 100.569776 100.149232 100.152464  
100.362564 100.086809 100.548326 99.9622001  
100.378358 99.9683155 99.8611965 100.10501  
100.057712 99.6827938 100.163586 99.9644455  
100.488766 99.6607085 99.8838616 100.019234  
100.337085 99.5776573 100.319975 99.8458859  
100.065162 99.5690612 100.570613 99.8979803  
100.055477 99.7946749 100.148665 100.08555



100.018525 99.9586615 99.813411 99.923279  
99.9554984 99.8942571 99.7695918 100.020582  
99.7775934 99.4918288 100.288055 99.9123511  
99.8656519 99.7285513 99.8219104 100.105909  
99.8033702 99.7862111 100.258969 100.098274  
100.09377 100.11392 100.132422 100.196026  
99.9343405 100.055466 100.280123 100.254408  
99.8148432 100.058773 100.036662 100.097975  
100.044749 100.119077 100.055927 100.269377  
100.261543 100.220908 99.702541 100.384194  
100.071271 100.186788 99.8942497 100.270575  
100.358392 100.646347 99.4046841 100.446318  
100.332317 100.657324 100.051772 100.421918  
100.089449 100.59768 99.9913318 100.275964  
100.076486 100.5141 100.244047 100.284796  
100.097644 100.481831 99.5193316 100.279557  
100.043855 100.459349 99.8356983 100.255605  
100.182424 100.321151 99.9994535 100.237941  
99.9814242 100.094744 99.9201257 100.008157  
100.178699 100.068427 99.9930317 100.352758  
100.081105 99.8479706 100.52585 99.9337577  
99.836001 99.9291704 99.8402313 99.8894476  
100.110905 99.8853965 99.7493821 99.9873491  
100.100475 100.153329 99.4981775 100.234049  
100.209095 100.468342 99.4492587 100.211295  
100.108223 100.101753 100.03534 100.175667  
100.071569 99.9700348 99.9839657 100.037198  
100.100922 99.8881737 100.317898 99.8795676  
100.004817 100.005874 100.10258 99.9632479  
99.8769758 100.179911 100.252925 99.8675919  
100.207307 100.336889 99.8305986 100.192433  
100.146068 100.384894 99.9189924 100.257401  
100.168418 100.383836 100.007386 100.146626  
100.050858 99.9525781 100.213827 99.9660922  
99.8121612 99.8028743 99.8566635 99.9081596  
99.838981 99.8293237 100.162264 99.7961867  
100.098091 100.203054 99.7692141 100.134201  
99.8000922 99.9535038 99.7703473 99.913399  
100.012118 99.9876236 99.8849948 100.192433  
99.9362775 99.7144009 100.126378 100.062347  
99.7181427 99.6265887 99.9127595 99.8337605  
99.9660773 99.7448177 99.7763913 99.8891482  
100.009138 99.8536572 99.7082072 100.066988  
99.8129062 99.9084075 99.5780719 99.9557631  
100.030594 99.8094866 100.060649 99.9665413  
100.085873 99.9491397 99.9545011 99.9340571

|            |            |            |            |
|------------|------------|------------|------------|
| 100.15173  | 99.7319898 | 100.41838  | 100.024324 |
| 100.106733 | 99.7676965 | 99.7371052 | 100.020133 |
| 99.9295725 | 99.5717061 | 100.366817 | 99.7437929 |
| 99.8891938 | 99.6161412 | 100.329041 | 99.8903458 |
| 99.7170997 | 99.9683155 | 100.120334 | 99.8327126 |
| 99.6528811 | 99.8909509 | 99.7652477 | 99.7851092 |
| 99.9504324 | 99.8641047 | 99.9601673 | 99.8346587 |
| 99.8276571 | 99.816628  | 99.9533678 | 99.9623498 |
| 99.7984533 | 99.6813391 | 99.7932013 | 99.8187909 |
| 99.7439196 | 99.5970976 | 100.390615 | 99.814749  |
| 99.9155666 | 99.7769538 | 100.295422 | 99.9319614 |
| 99.8835318 | 99.7975844 | 100.572691 | 99.714153  |
| 99.9021567 | 99.7834339 | 100.199284 | 99.8282217 |
| 99.9617564 | 99.9065561 | 100.322053 | 100.033456 |
| 99.9154176 | 100.025975 | 99.7012188 | 99.9767206 |
| 99.9030507 | 99.9673898 | 99.6845978 | 100.114441 |
| 100.110309 | 99.9751924 | 99.6504113 | 100.139291 |
| 99.8243791 | 99.9127717 | 99.9443018 | 99.8460356 |
| 99.8357031 | 99.9580003 | 99.9731998 | 99.8470835 |
| 99.7471975 | 99.8041967 | 100.181152 | 99.7204403 |
| 99.9133316 | 100.216808 | 99.7440936 | 100.036449 |
| 99.843004  | 99.9416016 | 100.15792  | 99.8653465 |
| 99.7984533 | 100.24339  | 99.9099264 | 99.7845104 |
| 99.7467505 | 100.112597 | 100.101446 | 99.7288233 |
| 99.8194621 | 100.174489 | 100.252169 | 99.6803216 |
| 99.4681221 | 100.028224 | 100.046672 | 99.6315206 |
| 99.7290196 | 100.05626  | 99.6377566 | 99.8434908 |
| 99.7375126 | 99.8658239 | 100.168308 | 99.8702864 |
| 99.5359167 | 99.7581747 | 99.9208812 | 99.6940937 |
| 99.7577765 | 99.6398135 | 99.9724442 | 99.7345118 |
| 99.7921953 | 99.9062916 | 99.7992453 | 99.8563647 |
| 99.7592665 | 99.9127717 | 99.7826242 | 99.8454368 |
| 99.9724843 | 100.055995 | 99.9216367 | 100.053066 |
| 99.8032212 | 99.8190084 | 99.9265475 | 99.9166923 |
| 99.6682545 | 99.6221241 | 99.8689184 | 99.8249897 |
| 99.6742388 | 99.4499741 | 99.6485406 | 100.18231  |
| 99.7648955 | 99.3802524 | 99.6416693 | 100.309539 |
| 99.8090578 | 99.6116601 | 99.8983122 | 100.106668 |
| 99.886597  | 99.5231178 | 100.013578 | 100.273526 |
| 99.8861597 | 99.6013943 | 100.060646 | 100.283537 |
| 100.083068 | 99.9579874 | 100.012376 | 100.176331 |
| 99.8089121 | 99.594693  | 100.28654  | 100.035753 |
| 99.7957946 | 99.6260607 | 100.011173 | 100.253364 |
| 99.5978657 | 99.3130971 | 100.152035 | 100.137397 |
| 99.7689765 | 99.547499  | 100.273313 | 100.096656 |
| 99.5936389 | 99.2721766 | 99.950534  | 100.030608 |

|            |            |            |            |
|------------|------------|------------|------------|
| 99.8768317 | 99.4378548 | 99.8600047 | 100.073296 |
| 99.6838584 | 99.499592  | 100.086242 | 100.207756 |
| 99.7125712 | 99.457816  | 100.109089 | 99.9227069 |
| 99.7501747 | 99.3095326 | 99.720861  | 100.04493  |
| 99.6918746 | 99.2758837 | 99.5683182 | 100.060643 |
| 99.8239244 | 99.3658518 | 99.7985066 | 100.09026  |
| 99.6411535 | 99.3133823 | 99.6615961 | 100.112091 |
| 99.6910001 | 99.3689886 | 100.298737 | 100.154083 |
| 99.5480191 | 99.5186978 | 99.9113676 | 100.167154 |
| 99.4659617 | 99.3597209 | 99.9513929 | 99.9215945 |
| 99.6968301 | 99.6919327 | 99.9962281 | 100.141291 |
| 99.4799537 | 99.5256842 | 100.13039  | 100.035475 |
| 99.7796163 | 99.9090824 | 99.8160284 | 100.203862 |
| 99.7114052 | 99.5797221 | 99.8830235 | 100.146575 |
| 99.6487325 | 99.5908434 | 100.018044 | 99.9524633 |
| 99.4808282 | 99.4864747 | 99.5167835 | 99.9945949 |
| 99.6647651 | 99.4967404 | 99.7201738 | 99.9608061 |
| 99.6589351 | 99.4494038 | 100.233631 | 100.035614 |
| 99.9991162 | 99.8975334 | 100.211471 | 99.8967049 |
| 100.105514 | 99.9403074 | 100.127985 | 100.096795 |
| 100.133352 | 99.9578448 | 99.9941667 | 99.9663681 |
| 100.184073 | 100.112544 | 100.0244   | 100.254198 |
| 100.310002 | 100.233167 | 100.063395 | 100.140735 |
| 100.104785 | 99.9775209 | 100.303203 | 100.093875 |
| 100.028558 | 99.9477216 | 99.8022858 | 99.9299374 |
| 100.191798 | 99.9036643 | 99.9534543 | 100.168266 |
| 100.100996 | 99.9926344 | 99.9029503 | 100.033806 |
| 100.139911 | 100.191534 | 100.37518  | 100.106529 |
| 100.25826  | 100.314723 | 100.222294 | 99.902823  |
| 100.246017 | 100.204081 | 100.165949 | 100.17202  |
| 100.215701 | 100.35436  | 100.065628 | 99.9680367 |
| 99.9074393 | 99.94045   | 100.467942 | 100.086089 |
| 99.9491239 | 99.9050901 | 100.294099 | 100.000713 |
| 100.158275 | 100.336253 | 100.089162 | 100.062589 |
| 99.8855767 | 99.9658293 | 100.144476 | 100.083447 |
| 100.137287 | 100.210212 | 100.150832 | 100.069264 |
| 100.034534 | 100.173141 | 99.9154904 | 100.044096 |
| 100.152008 | 100.226894 | 99.6765411 | 100.053273 |
| 99.9814804 | 100.153465 | 99.8653299 | 100.046738 |
| 100.104056 | 100.10456  | 100.046217 | 99.9616404 |
| 100.067182 | 100.106413 | 100.013063 | 99.9731814 |
| 99.9730269 | 99.9403074 | 100.199447 | 99.8962878 |
| 100.207393 | 100.29519  | 100.265411 | 100.007387 |
| 100.017043 | 99.9685383 | 100.01083  | 100.11946  |
| 99.9886222 | 99.8784276 | 99.9378221 | 99.937307  |
| 99.9513101 | 100.037832 | 99.5257162 | 100.041871 |

|            |            |            |            |
|------------|------------|------------|------------|
| 100.153903 | 100.181981 | 99.626896  | 99.9663681 |
| 100.087878 | 100.227464 | 99.8397344 | 99.8477599 |
| 100.133061 | 100.319856 | 99.6909708 | 99.7598814 |
| 100.119943 | 100.614569 | 99.8079546 | 99.8919773 |
| 99.9196823 | 100.10128  | 99.9989766 | 99.7925578 |
| 100.23013  | 100.467141 | 100.083837 | 99.9069945 |
| 99.9988247 | 99.9976247 | 100.002584 | 99.8950363 |
| 100.280851 | 100.484393 | 100.133482 | 99.9453718 |
| 99.9698204 | 99.8570406 | 100.187078 | 99.8908649 |
| 100.268754 | 100.407685 | 99.7346036 | 99.9456499 |
| 100.18349  | 100.242577 | 99.6914862 | 99.9302155 |
| 100.294115 | 100.548982 | 100.12558  | 99.9491261 |
| 100.240333 | 100.30959  | 99.9098216 | 99.9371679 |
| 100.391767 | 100.748452 | 100.123691 | 99.9976539 |
| 100.117757 | 100.135215 | 100.043468 | 99.9043526 |
| 100.229256 | 100.387154 | 99.8764958 | 99.9930653 |
| 99.7625635 | 99.7915963 | 99.9328404 | 99.9375851 |
| 100.327783 | 100.36648  | 100.13228  | 100.064675 |
| 100.020396 | 100.150471 | 100.105997 | 100.006692 |
| 100.050712 | 100.149615 | 100.122316 | 99.9955682 |
| 99.7137372 | 99.8202549 | 99.8364705 | 100.06245  |
| 99.8835362 | 99.8973908 | 99.7392417 | 99.9192307 |
| 100.059311 | 100.21677  | 99.6390926 | 100.06106  |
| 99.9306136 | 100.336253 | 100.021824 | 99.9346651 |
| 100.024768 | 100.472702 | 99.9945103 | 99.8559638 |
| 99.8208636 | 100.04767  | 99.9156622 | 99.7754548 |
| 99.8567182 | 100.067632 | 100.085898 | 99.9580252 |
| 100.052752 | 100.059077 | 99.9166929 | 99.8330208 |
| 100.375589 | 100.449746 | 99.796617  | 100.013227 |
| 100.305629 | 100.33169  | 100.067518 | 99.9507947 |
| 100.402844 | 100.346804 | 100.051542 | 100.123493 |
| 100.26409  | 100.09686  | 100.009971 | 99.8723715 |
| 100.370196 | 100.093296 | 100.138807 | 100.070515 |
| 100.099684 | 99.83822   | 99.8230715 | 99.8217579 |
| 100.27473  | 100.415385 | 99.7309961 | 100.030052 |
| 100.064412 | 100.076899 | 99.8991711 | 99.8957316 |
| 100.110615 | 100.355644 | 100.176428 | 100.101662 |
| 100.028558 | 100.076329 | 100.10239  | 99.7733691 |
| 100.190195 | 100.41624  | 100.199275 | 99.9174231 |
| 99.7216077 | 100.064067 | 100.000866 | 99.7336013 |
| 100.331573 | 100.637525 | 100.015468 | 99.8822439 |
| 100.2243   | 100.320284 | 100.166808 | 100.121685 |
| 100.00859  | 99.8131259 | 100.732831 | 99.8412247 |
| 100.158794 | 99.9903245 | 100.38872  | 100.128172 |
| 100.641718 | 100.717398 | 100.000094 | 100.134579 |
| 100.740438 | 100.879113 | 99.9036683 | 100.183463 |

|            |            |            |            |
|------------|------------|------------|------------|
| 100.589944 | 100.695626 | 100.179196 | 100.062436 |
| 100.625191 | 100.929962 | 99.7458803 | 100.03876  |
| 100.453784 | 100.735159 | 99.7812881 | 99.7811064 |
| 100.665996 | 101.037963 | 99.6424072 | 99.7057603 |
| 100.645228 | 100.890572 | 99.8256337 | 99.786538  |
| 100.563034 | 100.864359 | 99.8852769 | 100.038481 |
| 100.19404  | 100.273362 | 100.087754 | 99.9089581 |
| 100.56786  | 100.691185 | 100.330796 | 99.8141139 |
| 100.126326 | 100.291983 | 100.294013 | 99.8535278 |
| 100.095028 | 100.370047 | 100.325296 | 99.943219  |
| 99.8522493 | 100.178968 | 100.295388 | 100.022743 |
| 100.070165 | 100.342402 | 100.069019 | 99.8731652 |
| 100.216417 | 100.585333 | 100.063691 | 100.074135 |
| 100.389725 | 100.58032  | 99.9196533 | 100.017451 |
| 100.340292 | 100.539927 | 99.5379027 | 100.119537 |
| 100.404789 | 100.648214 | 99.6131872 | 99.9851398 |
| 100.408884 | 100.680299 | 100.246917 | 99.915086  |
| 100.097806 | 100.358158 | 100.37497  | 99.9600709 |
| 100.041353 | 100.154331 | 100.332515 | 99.9018552 |
| 100.15426  | 100.12153  | 100.447848 | 100.068564 |
| 99.9669109 | 99.5792331 | 100.383564 | 99.8536671 |
| 99.8450829 | 99.5396996 | 100.324092 | 100.007423 |
| 99.9673496 | 99.4275447 | 100.71839  | 99.8060361 |
| 100.022925 | 99.4288338 | 100.567822 | 99.9317987 |
| 99.6787944 | 99.093515  | 100.265481 | 100.022604 |
| 100.062852 | 99.6952554 | 100.191571 | 99.9632741 |
| 99.886326  | 99.4720915 | 100.212885 | 100.016058 |
| 100.115064 | 99.611748  | 100.234026 | 100.097672 |
| 100.253126 | 100.0078   | 100.093598 | 100.119537 |
| 99.936783  | 99.6794993 | 100.353828 | 99.9237209 |
| 99.8651195 | 99.5026011 | 100.302091 | 99.7975405 |
| 100.140658 | 99.848806  | 100.198446 | 99.8258127 |
| 99.7253025 | 99.5346863 | 100.118006 | 99.8400185 |
| 99.8929074 | 99.5010255 | 100.5649   | 99.8227487 |
| 99.760403  | 99.5603258 | 100.308107 | 99.9962816 |
| 99.6916646 | 99.395746  | 100.294701 | 99.8780397 |
| 100.199744 | 100.023126 | 100.082082 | 100.143631 |
| 99.8762346 | 99.70342   | 99.956608  | 100.058258 |
| 100.379342 | 100.325357 | 99.6987846 | 100.068285 |
| 99.8864723 | 99.7582799 | 100.054409 | 99.9600709 |
| 100.086984 | 99.9126899 | 100.338531 | 99.9278991 |
| 100.027605 | 100.065238 | 100.008173 | 100.05018  |
| 99.7659606 | 99.7356484 | 100.041862 | 99.9700985 |
| 100.065485 | 100.091593 | 99.823743  | 100.100875 |
| 99.8367466 | 99.7340728 | 100.072285 | 99.9260885 |
| 99.9777335 | 99.945348  | 100.011095 | 100.017312 |

99.7462166 99.7181734 99.8978243 100.03681  
100.10936 100.239128 100.099958 100.141124  
99.6793794 99.6591596 99.931857 99.9308238  
100.036527 100.108209 100.003876 99.9163395  
99.9227428 99.9694119 100.091364 100.153241  
100.014443 100.080564 99.7321297 99.9993456  
100.066216 100.20561 99.6408602 100.223573  
99.8814997 100.180687 99.8239149 100.057561  
100.177075 100.575306 99.6181718 100.163826  
99.8964174 100.363458 99.816524 100.126501  
100.464314 100.779849 99.9232629 100.217028  
99.811445 99.8734428 99.8216804 100.269812  
100.023072 100.101906 99.8907771 100.073717  
99.702341 99.8669971 100.064378 99.9937747  
99.6352113 99.6794993 100.050971 99.9330521  
99.7305676 99.8847586 100.115943 100.001156  
99.793456 99.7822006 99.9031526 99.8891815  
100.072651 100.032436 99.8545099 100.033606  
99.5531639 99.4168019 99.8319934 99.9012981  
99.8576606 99.7435265 100.215463 99.8865353  
100.050567 99.9321701 100.015048 99.8934989  
99.6173686 99.4473115 100.098411 99.8597951  
100.085083 99.8214476 100.339562 99.8763684  
99.7270576 99.4819749 99.8945585 99.9784548  
99.7845346 99.4924312 99.9868593 99.7735857  
100.032432 99.8400685 100.018486 99.9713519  
99.6157598 99.3639473 100.053034 99.8283196  
99.7696169 99.6227773 99.9371853 99.8313836  
100.024534 100.03258 99.852963 100.026086  
99.8939311 99.8685727 100.014532 99.8900171  
100.100146 100.143875 99.7964137 100.157698  
99.8589769 99.6737698 99.7579121 99.9217711  
99.9911887 99.9931893 99.9543736 99.9787333  
99.7808783 99.7718875 100.025877 100.017869  
99.6723593 99.7859247 99.7407239 99.9128577  
100.280329 100.397119 99.566779 100.043773  
99.7936022 99.842217 99.492182 100.04252  
100.278574 100.338391 99.3510667 100.223991  
100.37276 100.626299 99.4535085 100.28917  
99.9171852 100.268492 99.7496617 100.25477  
99.8165638 100.397835 99.7671937 100.331927  
99.5898732 100.083286 99.7795693 100.104078  
99.9265453 100.119954 100.278544 100.166611  
99.6356501 99.6759184 100.169742 100.140707  
99.9062163 99.7491127 100.355031 100.067032  
99.5879719 99.5220814 99.7335048 99.9794297

|            |            |            |            |
|------------|------------|------------|------------|
| 100.022194 | 100.054925 | 99.4543679 | 99.9866718 |
| 100.183218 | 100.389384 | 99.5602474 | 100.091404 |
| 100.05554  | 100.370333 | 99.6241877 | 100.100736 |
| 100.708555 | 100.849463 | 99.3385193 | 100.197808 |
| 99.5739474 | 99.5668871 | 99.2978952 | 100.223054 |
| 99.6863258 | 99.8204973 | 99.3937241 | 100.04626  |
| 99.3199315 | 99.3385096 | 99.8263277 | 100.121571 |
| 99.1778572 | 99.1447736 | 99.8718378 | 99.9155433 |
| 99.4633158 | 99.3219729 | 99.8113866 | 100.063243 |
| 99.4864611 | 99.1432055 | 99.7674221 | 99.9009264 |
| 99.5394478 | 99.133369  | 99.8526033 | 100.016191 |
| 99.3026089 | 98.7833897 | 99.8601597 | 99.7013022 |
| 99.5634665 | 99.0177547 | 99.9827794 | 99.9368421 |
| 99.0934279 | 98.6995658 | 100.020733 | 99.7482153 |
| 99.4909737 | 99.0756331 | 99.9741926 | 99.7619969 |
| 99.5055305 | 99.0759182 | 99.3719136 | 99.8877017 |
| 99.357488  | 99.1181153 | 99.7961021 | 99.714527  |
| 99.5506565 | 99.6226272 | 99.3234839 | 100.122267 |
| 99.492575  | 99.7312562 | 99.5743906 | 100.093173 |
| 99.8567857 | 100.044598 | 99.7504202 | 100.188948 |
| 99.8281089 | 99.9428118 | 99.7868283 | 100.152336 |
| 100.272091 | 99.7878516 | 99.9072154 | 99.6748527 |
| 100.29873  | 100.213386 | 100.244162 | 99.7838525 |
| 100.531784 | 100.050728 | 100.788222 | 100.168902 |
| 100.575745 | 100.27711  | 100.349093 | 99.9509021 |
| 100.523195 | 100.064699 | 100.583856 | 100.232798 |
| 100.340362 | 99.859273  | 100.718154 | 99.9648229 |
| 100.194066 | 100.024212 | 100.612536 | 100.226395 |
| 100.457544 | 100.092925 | 100.361973 | 99.9603682 |
| 100.274857 | 100.071541 | 100.46553  | 100.097488 |
| 100.360596 | 100.024925 | 100.496786 | 100.020645 |
| 100.475158 | 100.305336 | 100.116905 | 100.236696 |
| 100.332938 | 99.9837259 | 100.179246 | 99.9673286 |
| 100.553328 | 100.29108  | 100.182165 | 100.014799 |
| 100.126232 | 99.972749  | 100.593817 | 99.7768921 |
| 100.323185 | 100.306762 | 100.63469  | 99.9791613 |
| 99.8803677 | 99.9110215 | 100.467247 | 99.8701615 |
| 99.8949245 | 99.7921283 | 101.169133 | 100.346113 |
| 99.9598478 | 99.7745937 | 101.190772 | 99.9840336 |
| 100.067859 | 99.8977636 | 100.761775 | 99.9141512 |
| 100.482582 | 100.358653 | 100.195561 | 100.020506 |
| 100.677788 | 100.621387 | 99.8909005 | 100.202729 |
| 100.170048 | 99.945663  | 100.130816 | 99.9074692 |
| 99.9946385 | 99.9121619 | 99.8325102 | 99.778841  |
| 100.13482  | 100.122862 | 99.7864848 | 100.117673 |
| 100.121428 | 100.085512 | 99.9293694 | 100.148438 |

99.8473238 99.7579144 99.8725247 99.9969799  
99.7905524 99.6385936 100.25292 99.8989775  
100.084599 99.924707 100.240555 100.12533  
100.065239 99.9161535 100.119138 100.159018  
100.276603 100.140539 100.13614 99.9618995  
100.414893 100.206971 99.900346 100.173078  
100.026518 99.9966987 99.8031433 99.8826902  
99.8580959 99.7993988 99.9506647 100.153171  
100.122738 100.079382 100.084104 99.9649621  
100.16932 100.380179 100.014379 100.043615  
100.039619 100.154653 99.8220343 100.01285  
100.269179 100.265563 99.9511799 100.098741  
99.8813867 99.9453779 99.8742421 99.9618995  
100.127542 100.201839 99.8623923 100.091363  
99.7806538 99.8311891 99.7110926 99.9822239  
100.010942 99.9681871 99.5951707 100.030251  
100.067568 100.178887 99.8797376 100.034705  
99.9282596 99.9791641 99.9441387 99.9710872  
99.6644906 100.035189 99.9247325 100.241847  
99.684579 99.8290508 99.7797871 99.9673286  
100.101049 100.111885 99.919237 100.263424  
99.8543111 100.329428 99.7986781 100.045703  
99.8685767 100.27098 99.7045667 100.191871  
99.6873448 99.9596337 99.5297392 99.9319698  
99.9969676 100.217093 99.3561138 100.210664  
99.6928763 99.9596337 99.637933 100.134517  
99.8666844 100.135407 99.9717883 100.164029  
99.7123824 99.8599858 99.9267934 100.010483  
99.7598375 100.131416 99.997377 99.9786045  
99.7310151 100.034476 99.8514011 99.7143877  
99.7527047 100.121864 99.9889619 99.8764258  
99.6567755 99.923424 99.8388644 99.7632497  
99.8797855 100.167198 99.8311363 99.9470043  
99.7441162 99.5447906 100.100247 99.7980517  
100.149086 100.084372 99.7833936 100.018975  
100.09639 100.101764 99.6952929 100.031782  
100.320419 100.581898 100.036018 99.9305777  
100.161168 100.226929 100.121027 99.9176314  
100.047043 100.194996 100.267518 99.8771219  
99.9487846 100.116875 100.105399 99.8412062  
100.27966 100.336841 99.9838098 99.9373989  
99.9019118 100.052296 100.270266 100.058092  
99.9765881 100.130133 100.191611 99.9172138  
99.7736665 99.9659062 99.7971325 99.9227821  
100.067131 100.32729 99.606677 99.8828294  
99.8457226 100.086653 99.6738259 99.924731



100.100321 100.62937 99.9800316 100.073127  
99.908899 100.216665 99.9204391 99.9179098  
100.061309 100.207827 99.9499778 99.9233389  
99.8537288 100.116447 100.188004 99.8877017  
100.109783 100.402133 99.837834 99.9248702  
100.204838 100.385596 99.9489473 100.036097  
99.9831386 99.911164 99.7265489 100.078277  
100.002354 100.059282 99.6355287 100.218738  
99.9911449 99.9445225 99.3365359 100.077999  
100.176162 100.368774 99.6655825 100.154285  
99.9070067 100.036615 99.7504202 100.06547  
100.188972 100.423802 99.690656 100.045424  
99.9250571 100.101906 99.7837371 99.8844999  
100.234104 100.588506 99.8559143 99.9439952  
99.9165228 100.163913 99.8504193 99.8640356  
100.610794 100.838603 99.6354261 99.8438719  
100.092535 100.431016 99.5136768 99.862645  
100.197617 100.291248 99.4601002 99.8524936  
100.623054 100.29525 99.5124747 100.148413  
100.092535 100.031004 99.3311386 100.027153  
100.32211 100.384427 99.6443555 100.188185  
99.6952668 99.8875203 99.7679938 100.075824  
99.6414122 99.7790497 100.067817 100.043006  
99.7311698 99.8119196 100.090655 99.9964208  
100.308099 100.078451 100.069019 99.97139  
100.210898 99.9967054 100.202273 99.8184239  
100.75499 100.338266 100.098726 99.8715449  
100.386765 100.236084 100.160889 99.9103426  
100.561026 100.373423 100.13204 99.7694748  
100.450836 100.279529 100.277315 99.6714374  
100.71646 100.414153 100.443883 99.8873977  
100.525415 99.9431132 100.607188 99.7397159  
100.113114 99.7619002 100.599118 99.5795187  
100.231331 99.7593278 100.550693 100.002261  
99.7764134 99.5082306 100.59139 99.9937787  
99.7661971 99.3691768 100.448176 99.7669717  
100.247385 99.9002395 100.266668 100.038973  
100.090054 99.8673696 100.477712 100.026319  
100.131503 100.003994 100.324022 99.989885  
100.298175 100.353987 99.7343367 99.9962817  
100.03401 99.8344998 99.7379428 100.039668  
100.199223 100.211932 100.287274 100.022981  
99.8022461 99.6272767 100.375195 99.9175738  
100.050065 100.05387 100.10216 99.8462359  
100.225201 100.272098 100.170333 100.030073  
100.039702 99.9987062 100.309598 100.069288

|            |            |            |            |
|------------|------------|------------|------------|
| 100.424565 | 100.364133 | 100.545541 | 100.119906 |
| 100.266212 | 100.119324 | 100.15007  | 100.231849 |
| 100.080276 | 99.8446466 | 99.8825309 | 100.007128 |
| 100.281829 | 100.365705 | 99.6196279 | 100.119628 |
| 99.99621   | 100.04258  | 99.8476718 | 99.9839054 |
| 100.358159 | 100.325118 | 100.153848 | 99.9672182 |
| 100.386619 | 100.521051 | 99.7183668 | 100.033967 |
| 99.8406302 | 99.8097759 | 100.183212 | 100.100438 |
| 100.240088 | 100.196497 | 100.30376  | 100.168299 |
| 100.317586 | 100.356559 | 100.003422 | 100.264111 |
| 99.9705233 | 99.8323561 | 99.910006  | 100.152585 |
| 100.294526 | 100.348556 | 99.8837329 | 100.278017 |
| 100.27745  | 100.521194 | 99.8682781 | 100.112258 |
| 100.10027  | 100.171059 | 99.7630139 | 99.8554139 |
| 100.113698 | 100.383284 | 99.9385115 | 99.9572059 |
| 100.01854  | 99.9921322 | 99.880642  | 100.04384  |
| 100.059697 | 99.7253147 | 100.128434 | 99.9601261 |
| 100.312332 | 100.189066 | 100.11109  | 100.144659 |
| 100.176163 | 100.18535  | 100.184414 | 100.13117  |
| 99.9204634 | 99.7941985 | 100.14303  | 99.9823757 |
| 100.157482 | 100.178061 | 100.220819 | 100.054965 |
| 100.332327 | 100.322975 | 99.9144708 | 100.072626 |
| 99.9255716 | 99.7746194 | 99.8531668 | 99.9453858 |
| 99.9293662 | 100.004994 | 99.5205456 | 99.9075614 |
| 100.160693 | 100.165199 | 99.7971861 | 99.9834882 |
| 99.8390248 | 99.8376438 | 100.019735 | 99.8789151 |
| 100.036346 | 100.055157 | 100.248809 | 99.89741   |
| 99.5833252 | 99.5005134 | 100.109888 | 99.8586123 |
| 99.8254517 | 99.8577945 | 99.9695928 | 99.9844616 |
| 99.6882613 | 99.8893782 | 99.8456111 | 99.9941958 |
| 99.8930253 | 99.8022016 | 99.7013665 | 99.9983676 |
| 100.185066 | 100.140047 | 100.117959 | 100.147162 |
| 99.7142399 | 99.6459982 | 99.9058848 | 100.007963 |
| 99.658488  | 99.7669022 | 99.9155011 | 99.9823757 |
| 100.077211 | 100.325976 | 99.5313639 | 100.135203 |
| 100.19499  | 99.9992778 | 99.7867112 | 100.055104 |
| 100.247093 | 100.348413 | 99.7899739 | 100.076519 |
| 99.7908622 | 99.8938084 | 99.7542562 | 100.115456 |
| 99.8631061 | 99.9634068 | 100.122767 |            |
| 99.9122903 | 100.299823 | 100.029008 |            |
| 99.7561268 | 100.052298 | 99.8078328 |            |
| 100.391581 | 100.652102 | 99.7987316 |            |
| 99.8995929 | 100.105033 | 99.691235  |            |
| 100.095892 | 100.335265 | 99.3486541 |            |
| 99.871717  | 100.374995 | 99.6903764 |            |
| 99.8544952 | 100.28496  | 99.9651281 |            |

|            |            |            |            |
|------------|------------|------------|------------|
| 100.061594 | 100.427301 | 99.6922654 |            |
| 99.8096894 | 100.053585 | 100.100443 |            |
| 99.999129  | 100.148621 | 99.9967245 |            |
| 99.8698197 | 99.9519738 | 99.843207  |            |
| 100.119098 | 100.342982 | 100.176172 |            |
| 99.675126  | 99.7468944 | 99.9213396 |            |
| 99.713948  | 99.7806218 | 99.6670225 |            |
| 99.8822252 | 99.9965625 | 99.788085  |            |
| 99.8270571 | 99.679011  | 99.6694266 |            |
| 100.115449 | 100.109035 | 99.4801914 |            |
| 99.8063326 | 99.7063073 | 99.9747444 |            |
| 99.5188165 | 99.6755811 | 99.843207  |            |
| 99.4532862 | 99.4099069 | 100.065756 |            |
| 99.7514565 | 99.8369293 | 100.045665 |            |
| 99.1987541 | 99.1166505 | 100.014412 |            |
| 99.5698981 | 99.5175199 | 99.8845915 |            |
| 99.2321761 | 99.3060095 | 100.091342 |            |
| 99.4184048 | 99.5576783 | 100.147666 |            |
| 99.3175552 | 99.5625374 | 100.140626 |            |
| 99.3308364 | 99.3853259 | 99.8844198 |            |
| 99.6082822 | 99.9479723 | 100.029008 |            |
| 99.6938302 | 99.4974679 | 99.8593524 | 99.9009333 |
| 99.6699204 | 99.3380665 | 99.8992783 | 99.88162   |
| 99.8353708 | 99.611558  | 99.9297744 | 99.9018315 |
| 99.8988352 | 99.7336182 | 100.053364 | 99.7557097 |
| 100.023845 | 99.7610706 | 100.1918   | 99.882668  |
| 99.7822377 | 99.569051  | 99.9885597 | 99.8525753 |
| 99.8932268 | 99.6409292 | 99.9761205 | 100.132542 |
| 99.7754485 | 99.4992391 | 100.113554 | 99.8687445 |
| 99.9081335 | 99.6875689 | 100.099911 | 99.9091676 |
| 99.66933   | 99.5560627 | 99.8936606 | 99.9076704 |
| 99.8610517 | 99.6812223 | 100.03932  | 100.096611 |
| 99.9056245 | 99.7808482 | 100.094895 | 99.9733953 |
| 99.8207592 | 99.8254216 | 100.09971  | 99.9185996 |
| 99.8862899 | 99.7370128 | 100.256203 | 100.091371 |
| 99.9255494 | 99.6834362 | 99.846512  | 99.9813302 |
| 99.9001636 | 99.6241035 | 100.04273  | 100.099905 |
| 99.9367663 | 99.6615923 | 100.325622 | 100.009027 |
| 99.9286488 | 99.7610706 | 99.9323826 | 99.9468958 |
| 99.9023774 | 99.7157593 | 100.123987 | 99.7890961 |
| 100.183097 | 99.9817235 | 99.9211472 | 100.127302 |
| 99.8976545 | 99.7495583 | 100.143448 | 100.1285   |
| 99.9336669 | 99.7491155 | 100.131811 | 100.08658  |
| 99.8377322 | 99.8508077 | 99.9093099 | 100.02864  |
| 99.8634132 | 99.921948  | 100.135623 | 100.001242 |
| 100.04687  | 99.8382622 | 100.290913 | 100.065171 |

|            |            |            |            |
|------------|------------|------------|------------|
| 99.8758109 | 99.6072778 | 100.120977 | 100.017262 |
| 99.9091667 | 99.6890448 | 100.101716 | 100.00768  |
| 99.9248114 | 99.5556199 | 100.113353 | 99.8883572 |
| 99.9420796 | 99.7387839 | 99.9165327 | 99.9474946 |
| 99.8728591 | 99.583958  | 100.052762 | 99.7730766 |
| 100.063695 | 99.9175201 | 100.010629 | 100.248422 |
| 100.055135 | 99.9433491 | 100.066204 | 100.212939 |
| 99.9645136 | 99.9858561 | 99.8178215 | 100.088526 |
| 99.9868    | 99.9613555 | 99.814812  | 99.9970503 |
| 99.7274812 | 99.8738323 | 100.252993 | 100.082538 |
| 99.9966886 | 99.9585512 | 100.308769 | 100.029389 |
| 100.053216 | 99.9269661 | 100.059383 | 100.010525 |
| 100.041114 | 99.9671117 | 100.35973  | 99.8790749 |
| 99.8963262 | 100.041499 | 100.078242 | 99.8804223 |
| 100.085096 | 100.09478  | 99.8471139 | 99.92893   |
| 99.9264349 | 99.969916  | 100.151273 | 99.8561685 |
| 99.9898994 | 99.997516  | 100.343679 | 100.038521 |
| 99.8302051 | 100.010209 | 99.9795312 | 100.047355 |
| 99.8603138 | 100.01995  | 100.104124 | 100.022202 |
| 99.8079187 | 99.6041783 | 99.9323826 | 100.032832 |
| 100.045984 | 100.029396 | 99.949637  | 99.8849138 |
| 99.9068052 | 99.9845278 | 100.227112 | 99.9178511 |
| 100.090705 | 100.103046 | 100.081252 | 100.043163 |
| 100.068418 | 100.036776 | 99.8727948 | 100.033132 |
| 100.060301 | 100.047108 | 100.018855 | 100.105594 |
| 99.8397985 | 99.9855609 | 100.149467 | 100.092568 |
| 99.9326338 | 100.063343 | 99.9530478 | 100.083136 |
| 99.877582  | 99.7587091 | 99.9875565 | 99.9847737 |
| 100.042442 | 100.362663 | 99.9000808 | 100.136435 |
| 99.9633329 | 100.166068 | 99.6825953 | 99.9668079 |
| 99.8778772 | 99.9669641 | 100.043332 | 100.162485 |
| 100.040671 | 100.16046  | 100.453826 | 99.9368649 |
| 100.224866 | 100.316319 | 99.6613283 | 99.9979486 |
| 99.9735167 | 100.009766 | 99.6968402 | 99.9894148 |
| 99.9906373 | 99.9635694 | 100.081854 | 100.166079 |
| 100.062072 | 100.112344 | 100.299139 | 99.9835759 |
| 100.192395 | 100.272336 | 99.8262481 | 99.9698022 |
| 100.019565 | 100.107326 | 99.8750018 | 100.162336 |
| 100.001559 | 100.063195 | 100.011231 | 100.185691 |
| 100.020598 | 100.200458 | 100.044937 | 99.9852228 |
| 100.17985  | 100.327388 | 99.8621613 | 99.8852132 |
| 100.204055 | 100.281339 | 99.7993633 | 100.212939 |
| 100.092033 | 100.186141 | 99.8545373 | 100.094814 |
| 100.146642 | 100.370191 | 100.106532 | 100.035976 |
| 100.208778 | 100.414174 | 100.11556  | 99.7898447 |
| 100.219552 | 100.579479 | 100.0331   | 100.051397 |

|            |            |            |            |
|------------|------------|------------|------------|
| 100.015433 | 100.261561 | 99.9975881 | 100.047953 |
| 100.290987 | 100.422734 | 99.8683809 | 100.126105 |
| 99.9887186 | 99.9626839 | 100.01725  | 99.8929984 |
| 100.204498 | 100.221268 | 99.8426999 | 99.9513872 |
| 100.023403 | 100.016703 | 99.9957825 | 99.7798138 |
| 100.114467 | 100.216545 | 99.676777  | 99.9853725 |
| 99.9153655 | 99.9659309 | 100.066004 | 99.7940367 |
| 100.176013 | 100.222744 | 99.99819   | 99.998248  |
| 99.9172842 | 100.100832 | 99.9297744 | 99.9112636 |
| 99.9437032 | 100.135221 | 99.7269351 | 99.9732456 |
| 99.9711552 | 99.9663737 | 99.7092794 | 99.9560284 |
| 100.061924 | 100.115148 | 99.8045798 | 100.021454 |
| 100.004511 | 100.103784 | 99.9759198 | 99.9274328 |
| 100.056758 | 100.17271  | 99.7975577 | 100.16533  |
| 99.986062  | 100.143044 | 99.9598693 | 100.092119 |
| 100.034325 | 100.141272 | 100.256805 | 99.9762399 |
| 100.015876 | 100.006076 | 100.063997 | 100.051097 |
| 100.054692 | 100.149538 | 99.9221504 | 99.897939  |
| 100.018237 | 100.191454 | 99.9466275 | 99.8322141 |
| 100.12406  | 100.228796 | 99.7939463 | 99.8632051 |
| 100.21173  | 100.205033 | 100.08707  | 100.237792 |
| 100.089081 | 100.136697 | 99.9570604 | 100.105743 |
| 99.986062  | 100.098618 | 99.8202291 | 100.116373 |
| 100.063253 | 99.944825  | 99.9490351 | 100.008728 |
| 100.151808 | 100.302888 | 99.7770932 | 99.9675564 |
| 100.061777 | 100.212708 | 99.8842308 | 99.7049563 |
| 100.080964 | 100.096847 | 99.8471139 | 99.9233905 |
| 100.168485 | 100.044156 | 99.7981596 | 99.780263  |
| 100.101331 | 99.9522047 | 100.133617 | 99.903179  |
| 99.7093066 | 99.6491371 | 100.18052  | 100.032196 |
| 100.055371 | 100.167431 | 100.145005 | 100.231781 |
| 99.8319418 | 100.058961 | 100.051502 | 100.057519 |
| 100.030578 | 100.324159 | 99.8907817 | 100.083441 |
| 99.9835017 | 100.226463 | 100.236702 | 100.113109 |
| 100.150114 | 100.317961 | 99.8233633 | 100.055121 |
| 100.027184 | 100.076228 | 99.859079  | 100.164653 |
| 99.951773  | 99.9373571 | 99.8771375 | 100.083441 |
| 100.014345 | 100.20285  | 99.9357273 | 100.011968 |
| 100.099644 | 100.302613 | 100.039263 | 99.7972491 |
| 100.206931 | 100.33021  | 99.9030213 | 99.904084  |
| 100.152033 | 100.195766 | 100.132766 | 100.023655 |
| 100.083705 | 100.258487 | 100.212022 | 100.23298  |
| 100.006081 | 99.9729234 | 100.202993 | 100.027551 |
| 100.108941 | 100.194438 | 99.8805485 | 99.9944366 |
| 99.8571772 | 100.018673 | 99.9455591 | 99.7905064 |
| 100.138013 | 100.272507 | 99.8089165 | 100.044033 |

99.8508314 100.047008 99.9951197 99.8433994  
99.9628412 100.15961 99.9812748 100.128542  
100.019805 99.9248129 99.943352 99.8583833  
100.223754 100.383486 99.6734778 99.8260181  
100.07736 100.247566 99.9630157 99.8935953  
99.982026 99.9941746 100.210016 100.118653  
100.161478 100.364153 100.151627 100.091682  
99.9293415 99.9367668 99.978867 100.158809  
100.079868 99.8803919 100.052104 100.418779  
99.9671208 99.987386 100.253757 100.045681  
100.125764 100.327849 99.8679076 100.111311  
99.8778377 100.007457 99.8691115 100.164204  
100.085329 99.8917555 99.9483682 100.177389  
99.9867484 99.8929361 100.483702 100.032645  
100.093741 99.9484254 99.9987314 99.8469955  
100.158674 100.120059 100.124338 100.035942  
100.15159 99.9600841 99.9006135 99.9010872  
100.252532 99.9912231 99.6925395 99.956977  
99.9225531 99.7601158 99.9511773 99.7870601  
100.081639 100.044646 100.011172 99.977355  
99.8716396 99.8945594 99.8699141 99.8165783  
99.974352 99.9921085 100.016389 99.9343514  
99.9495594 99.7215979 99.9782651 100.164953  
100.01036 99.8548609 99.9939158 99.984847  
100.032939 100.006866 99.9533845 100.081942  
100.09197 99.8622398 99.8650985 99.9686644  
100.211358 99.9993399 99.8456354 100.090633  
100.311267 99.7949442 99.9160636 99.9358498  
100.113958 99.7100869 99.9277013 100.052424  
99.9386388 99.8042417 99.9531838 99.7611381  
100.05906 100.091133 99.9772618 99.9721107  
99.9389339 99.8790637 100.22045 99.8032427  
100.244563 100.171268 99.694546 99.9351006  
99.9330309 99.9776459 99.9710417 99.8210735  
100.182728 100.07608 99.8323925 100.015864  
100.102595 99.9510818 99.9529832 100.08374  
100.156017 99.948573 100.110895 100.126295  
99.9837969 99.8623874 100.07558 100.024404  
100.116615 99.9510818 100.060331 100.225637  
100.032054 100.173925 100.021405 100.135585  
99.9579712 100.075343 99.9443552 99.9210158  
99.9848299 100.206392 99.9004129 100.07505  
99.707093 99.8821629 99.9696371 100.006124  
99.9491166 100.079622 99.9670287 100.264296  
99.9597421 99.8899845 100.215233 100.277482  
100.047254 100.047155 100.012576 99.9875441

100.058027 100.118288 100.003346 100.096926  
99.8278097 99.6638949 99.8769368 100.008521  
99.9597421 99.9795644 100.125943 100.226686  
99.8314991 99.6572539 100.168682 100.15806  
99.9711054 99.9673154 99.9234876 99.9881434  
100.071161 100.11386 100.135575 99.9141232  
99.9464603 99.8138342 99.9264974 99.8661749  
99.9541342 100.134817 100.181323 99.9947363  
99.9749423 99.8792113 99.9921099 99.7672814  
99.9752375 99.9469497 99.8889758 100.050776  
99.7907683 99.8772928 100.080195 100.026652  
99.973319 100.049516 99.9242902 99.8847548  
99.9842396 100.144262 100.015385 100.080144  
99.9601848 99.7559836 100.007761 100.082392  
99.8799038 100.002734 100.138183 100.011818  
99.9060246 100.067373 99.9971262 99.7591902  
99.8531926 100.041842 99.786243 100.048379  
99.7646474 99.7087587 100.373546 99.961622  
99.9367203 99.9853199 100.255563 99.8477447  
100.084148 100.15164 100.069561 100.003127  
100.002391 100.020296 99.9050278 99.9772052  
99.8889059 100.025018 100.135374 100.1215  
99.7861934 100.000373 100.252955 99.782565  
99.9966359 100.204326 99.9423487 99.9130743  
99.8636705 99.912564 99.9439539 99.9436414  
99.8010985 99.9316015 100.376355 100.071154  
99.8314991 100.212885 100.109089 99.9295566  
99.8971701 100.157986 99.9907054 99.8798102  
99.9305221 100.058224 100.105477 100.022756  
99.9514778 99.8325767 100.177109 99.9427424  
99.8751814 99.9836966 100.044078 99.8690218  
100.03353 99.9082842 99.8432276 99.8538881  
100.006671 99.894707 100.000738 100.111311  
100.079868 99.9763177 99.6648498 100.049577  
99.974352 99.8452684 99.8426257 99.9752573  
99.8794611 99.4404617 99.7023714 99.8646765  
99.8838267 99.7887463 99.4312318 100.074605  
99.8599184 99.7996665 99.8495074 99.8532629  
100.153754 99.9565336 99.9522206 100.038938  
100.135601 100.030466 99.8653557 100.162572  
99.9973171 99.9848671 99.9002621 100.16482  
100.118039 100.068097 100.191751 100.216821  
99.9762129 99.5783111 99.996957 99.9220481  
99.9731137 99.8471841 99.7750804 99.9296909  
99.8444223 99.9382349 100.193155 99.8982205  
100.085866 99.963617 100.012404 99.8360291

|            |            |            |            |
|------------|------------|------------|------------|
| 100.030966 | 100.023235 | 99.988732  | 100.072806 |
| 99.9286916 | 99.9779313 | 100.023037 | 100.215322 |
| 99.9738516 | 100.080197 | 100.06998  | 100.200486 |
| 99.9269206 | 99.6900218 | 99.8489055 | 100.051077 |
| 99.9815259 | 99.8622362 | 100.091646 | 100.030246 |
| 99.8732008 | 99.9155091 | 100.442917 | 100.057371 |
| 100.081439 | 100.114581 | 99.9833154 | 100.055572 |
| 99.8895824 | 100.189104 | 99.9883307 | 100.124957 |
| 99.930315  | 100.326197 | 100.032666 | 99.992332  |
| 99.7859799 | 99.9652402 | 100.046709 | 99.9385326 |
| 99.9332666 | 99.9974105 | 99.8808028 | 99.9536683 |
| 99.9959889 | 100.109416 | 100.104886 | 99.7467131 |
| 100.092803 | 100.126387 | 100.080612 | 99.8147491 |
| 100.022258 | 100.104694 | 99.9339649 | 100.070858 |
| 99.8332061 | 99.9609607 | 100.06035  | 100.042535 |
| 100.027867 | 100.021907 | 100.243308 | 100.131401 |
| 99.6549273 | 99.6953343 | 100.190146 | 99.9331377 |
| 99.9297246 | 99.9205265 | 99.8352639 | 100.061867 |
| 99.8270077 | 99.8846669 | 100.158851 | 99.7901722 |
| 99.9260351 | 100.060128 | 99.9907381 | 99.8701969 |
| 99.9117197 | 99.9199362 | 100.144607 | 100.018857 |
| 100.026391 | 99.9224449 | 100.269388 | 100.063365 |
| 99.8953381 | 99.8918978 | 100.199976 | 100.065613 |
| 100.050299 | 99.9130004 | 99.6663488 | 99.7772844 |
| 100.025505 | 100.12314  | 100.041292 | 99.9154543 |
| 99.8038373 | 99.8067498 | 99.8954475 | 99.7576528 |
| 100.077454 | 100.018808 | 100.008191 | 100.011664 |
| 99.8368957 | 99.9236254 | 100.158048 | 99.9493224 |
| 99.9005034 | 100.029286 | 99.9833154 | 100.088541 |
| 99.7756492 | 99.8926357 | 100.092448 | 100.002223 |
| 99.9601265 | 100.119746 | 99.9945497 | 99.9031659 |
| 99.9205746 | 99.9822108 | 100.154839 | 99.9584638 |
| 100.067566 | 100.039763 | 99.8717753 | 100.02575  |
| 99.9993833 | 100.140996 | 100.131768 | 100.126006 |
| 99.8962236 | 99.8358212 | 100.077402 | 99.9815421 |
| 99.9102438 | 100.008331 | 99.9223294 | 100.06831  |
| 99.947582  | 99.9786691 | 99.9634549 | 99.8349801 |
| 100.13265  | 100.26466  | 99.8611428 | 100.072207 |
| 100.059301 | 100.062194 | 100.078004 | 99.9896345 |
| 100.179728 | 100.072819 | 99.9714793 | 100.115516 |
| 99.9670628 | 99.884962  | 99.8555257 | 99.8591074 |
| 100.154787 | 100.155016 | 99.9983613 | 99.9374836 |
| 99.9753274 | 99.9718809 | 100.047712 | 100.074605 |
| 100.117596 | 100.004641 | 99.9249374 | 100.104426 |
| 99.8931243 | 99.942662  | 100.103883 | 99.9292413 |
| 100.120991 | 100.234851 | 100.002374 | 100.163021 |



|            |            |            |            |
|------------|------------|------------|------------|
| 100.047938 | 100.267464 | 99.9907381 | 99.9364346 |
| 100.234038 | 100.36973  | 99.7947403 | 99.9863376 |
| 100.045281 | 100.087871 | 99.9239343 | 100.076852 |
| 99.9921518 | 100.14321  | 99.9656616 | 100.205132 |
| 99.9658822 | 100.141587 | 99.9817105 | 100.149984 |
| 100.159805 | 100.227177 | 99.8402792 | 99.8911772 |
| 100.278165 | 100.269973 | 99.8041691 | 100.052276 |
| 100.262079 | 100.059538 | 99.7415782 | 99.9619106 |
| 100.089113 | 99.9909174 | 99.8047709 | 100.107274 |
| 99.8647886 | 99.7375394 | 100.084223 | 99.9506712 |
| 100.023144 | 100.019398 | 99.9720812 | 100.176958 |
| 100.02521  | 100.057324 | 99.9809081 | 99.9810925 |
| 100.027424 | 100.373567 | 100.173696 | 99.9335872 |
| 99.855491  | 100.09038  | 100.148419 | 99.9771962 |
| 100.118777 | 100.294617 | 99.768059  | 100.012263 |
| 100.012075 | 100.019251 | 100.003778 | 100.114167 |
| 99.9675056 | 99.9166896 | 100.123744 | 100.049428 |
| 100.001154 | 99.9512211 | 100.115318 | 99.9346363 |
| 100.1418   | 100.109269 | 100.045906 | 99.8965721 |
| 100.043363 | 100.036369 | 99.8906328 | 99.8976211 |
| 100.128517 | 99.9881136 | 99.8091844 | 100.050178 |
| 100.070518 | 99.8809776 | 100.028654 | 100.02635  |
| 100.105937 | 99.819736  | 100.332982 | 100.076703 |
| 99.9642588 | 100.000214 | 100.105488 | 99.9712018 |
| 100.160247 | 100.164608 | 99.9271441 | 99.9039152 |
| 100.026096 | 99.9557957 | 99.9710781 | 99.9299906 |
| 100.110808 | 100.074442 | 99.7502045 | 99.9236966 |
| 100.032146 | 99.7308987 | 99.8842132 | 99.9632593 |
| 99.9781315 | 99.7145184 | 99.9464029 | 99.8865315 |
| 100.005729 | 99.9929834 | 100.081415 | 99.8363288 |
| 99.9641112 | 100.050093 | 100.235685 | 99.8920763 |
| 99.9781315 | 99.909016  | 100.120333 | 100.048229 |
| 100.006172 | 99.8827485 | 99.9221288 | 100.154929 |
| 99.8920913 | 99.7958296 | 99.9971576 | 100.131851 |
| 100.04233  | 99.8288854 | 99.8240297 | 100.024402 |
| 100.057088 | 100.130666 | 99.820218  | 100.057521 |
| 100.176334 | 100.09097  | 99.8545227 | 99.9610114 |
| 100.053693 | 100.045076 | 99.8236284 | 100.094985 |
| 100.135749 | 99.9104917 | 100.077202 | 99.9813923 |
| 99.9604217 | 99.9239206 | 99.9478071 | 100.096484 |
| 100.025653 | 99.7968626 | 100.021231 | 100.083446 |
| 100.102395 | 100.116352 | 99.962853  | 100.095285 |
| 99.8587378 | 99.7980432 | 100.021231 | 99.8490668 |
| 99.9310529 | 99.9619937 | 99.8304492 | 100.073705 |
| 99.9474345 | 99.779892  | 100.159051 | 100.062466 |
| 99.9741407 | 99.9325726 | 99.7902144 | 99.8752015 |

|            |            |            |            |
|------------|------------|------------|------------|
| 100.189833 | 100.23413  | 100.004661 | 99.7627698 |
| 100.198838 | 100.314467 | 99.6947266 | 99.7957059 |
| 100.053272 | 100.090292 | 99.8048586 | 99.9484093 |
| 100.060506 | 100.081432 | 99.7906156 | 99.8996041 |
| 100.127236 | 100.349319 | 99.8885107 | 99.8557393 |
| 100.235451 | 100.422862 | 99.8883101 | 99.7230969 |
| 100.084423 | 100.363939 | 99.5262186 | 99.91712   |
| 99.9514052 | 100.196768 | 100.392229 | 100.166536 |
| 99.9801936 | 100.317716 | 100.589022 | 100.079555 |
| 100.136537 | 100.230438 | 99.9689532 | 100.281812 |
| 99.631632  | 99.5034214 | 100.077681 | 100.313101 |
| 100.053272 | 100.014681 | 100.308778 | 100.268937 |
| 99.8560342 | 99.9034801 | 100.017299 | 100.074165 |
| 100.051796 | 100.019407 | 99.9442788 | 100.311604 |
| 99.8080535 | 99.7264146 | 100.279489 | 100.233156 |
| 100.079551 | 100.047318 | 99.9226135 | 99.9870342 |
| 100.069216 | 100.14065  | 99.8062628 | 99.9856868 |
| 99.8386135 | 99.5593912 | 100.187813 | 100.019072 |
| 99.8198641 | 99.7063304 | 100.254013 | 99.8786448 |
| 99.7051533 | 99.7996627 | 99.8718605 | 99.7470504 |
| 100.046924 | 100.069765 | 99.8154906 | 100.067877 |
| 99.7351228 | 99.6757612 | 100.243982 | 99.9590386 |
| 99.8638588 | 99.8736492 | 99.8784805 | 99.9295459 |
| 99.9057866 | 99.9452729 | 99.8794835 | 99.8901724 |
| 99.9881658 | 99.9372983 | 100.0177   | 100.159649 |
| 99.9230596 | 100.080546 | 100.071863 | 99.8540925 |
| 100.04781  | 100.230438 | 99.5872024 | 99.7674108 |
| 99.9491907 | 99.9528044 | 100.022314 | 99.8358279 |
| 99.8489478 | 99.6394325 | 100.176178 | 99.763219  |
| 100.075565 | 100.046727 | 99.6349464 | 99.8993046 |
| 99.7953571 | 99.7284821 | 99.8361529 | 100.013682 |
| 99.9137587 | 99.7162248 | 100.037761 | 99.8876273 |
| 100.000715 | 100.050419 | 100.055614 | 99.9204136 |
| 100.154401 | 100.030335 | 99.8054604 | 99.7722015 |
| 100.086342 | 100.037424 | 99.6999423 | 100.120725 |
| 100.289632 | 100.167528 | 99.9029543 | 99.9746084 |
| 100.095938 | 99.8413078 | 99.8550097 | 100.033743 |
| 99.7919615 | 99.5331046 | 99.788409  | 99.8260968 |
| 100.063606 | 99.8683328 | 99.8128827 | 99.7686085 |
| 100.07276  | 99.937446  | 100.167752 | 99.620097  |
| 100.228217 | 100.1089   | 99.848791  | 99.9258032 |
| 100.054158 | 99.9634372 | 99.9571175 | 99.8317858 |
| 100.245785 | 100.145524 | 99.8694533 | 100.006047 |
| 100.018431 | 99.8811808 | 99.9966367 | 99.8286419 |
| 100.342337 | 100.256282 | 100.033949 | 100.074015 |
| 99.8619396 | 99.8640502 | 100.178986 | 99.940325  |

|            |            |            |            |
|------------|------------|------------|------------|
| 100.111882 | 100.028563 | 99.9964361 | 100.108149 |
| 100.001305 | 99.7664352 | 99.9147899 | 100.011137 |
| 100.222607 | 100.157929 | 99.9302365 | 99.8660692 |
| 100.018726 | 100.203856 | 100.269258 | 99.7460024 |
| 100.100515 | 100.258349 | 99.9145893 | 99.8882262 |
| 99.9890516 | 99.9609267 | 99.975172  | 99.8644224 |
| 100.169902 | 100.286704 | 100.122616 | 99.9605357 |
| 99.8967809 | 99.9009696 | 100.265648 | 100.115784 |
| 100.101991 | 99.9325726 | 99.8754714 | 100.08165  |
| 99.9778315 | 100.033879 | 99.8662436 | 99.9654761 |
| 100.10642  | 100.218181 | 99.8211075 | 99.9701171 |
| 99.9221738 | 99.8987544 | 100.075073 | 100.096771 |
| 100.05962  | 100.060904 | 100.088514 | 100.108598 |
| 99.9703022 | 100.155123 | 100.034551 | 100.062488 |
| 100.050319 | 100.079364 | 99.9976397 | 100.048116 |
| 100.06213  | 100.259531 | 100.081894 | 100.038235 |
| 100.165768 | 100.303982 | 100.000849 | 99.9216113 |
| 100.150857 | 100.223498 | 100.048995 | 100.096322 |
| 100.096381 | 100.190122 | 99.8016489 | 100.11803  |
| 100.097857 | 100.195439 | 100.014691 | 100.18989  |
| 99.8640064 | 99.7109085 | 100.290523 | 99.8439122 |
| 100.119264 | 99.8204853 | 99.9192032 | 100.182704 |
| 99.8712404 | 99.8068989 | 100.161133 | 99.8967596 |
| 100.048991 | 100.158962 | 100.036557 | 99.8729558 |
| 100.049286 | 100.029597 | 100.061231 | 99.8955619 |
| 100.098595 | 100.105946 | 99.8102749 | 99.9915255 |
| 99.8845274 | 99.7930172 | 100.090118 | 99.7909152 |
| 100.11513  | 99.9984368 | 100.225326 | 100.211299 |
| 99.8733073 | 99.7259716 | 99.9876095 | 100.147672 |
| 100.09269  | 99.9909053 | 99.9206075 | 100.216688 |
| 99.8423044 | 99.8915182 | 99.8684503 | 100.131653 |
| 100.065968 | 100.204447 | 99.8562134 | 99.91712   |
| 99.9221738 | 100.005378 | 100.178385 | 100.126413 |
| 100.155877 | 100.113182 | 99.8040561 | 100.155457 |
| 99.8591345 | 99.9727409 | 100.010679 | 100.112341 |
| 100.07084  | 99.9901669 | 100.1834   | 100.004101 |
| 100.060506 | 100.008036 | 100.261636 | 100.131653 |
| 100.00721  | 99.794494  | 100.047791 | 100.057248 |
| 99.8597251 | 99.8566663 | 99.7332427 | 100.01488  |
| 99.9674972 | 99.9572348 | 99.8688515 | 99.9662246 |
| 100.026698 | 100.043183 | 99.8750702 | 100.050212 |
| 99.8755218 | 99.9008219 | 99.7448778 | 100.058895 |
| 99.9837368 | 99.9962217 | 100.255617 | 100.17971  |
| 100.010901 | 100.058246 | 100.280492 | 100.049613 |
| 100.047514 | 100.093984 | 100.033949 | 100.142283 |
| 99.9590821 | 100.101811 | 100.088514 | 99.8909209 |

|            |            |            |            |
|------------|------------|------------|------------|
| 100.061244 | 100.275775 | 100.081292 | 99.9626316 |
| 99.7798556 | 100.010251 | 100.081292 | 99.9325401 |
| 100.025812 | 100.224384 | 99.8931246 | 99.9942203 |
| 99.950667  | 99.9544289 | 100.037961 | 100.024611 |
| 99.9131682 | 100.032255 | 100.13706  | 100.114736 |
| 99.6737074 | 99.7958231 | 99.9757738 | 99.982543  |
| 99.8904327 | 99.9285853 | 99.8949301 | 100.035241 |
| 99.8434983 | 100.018261 | 100.760871 | 100.103338 |
| 99.8902507 | 100.230105 | 100.424533 | 100.058978 |
| 100.089464 | 100.327976 | 100.121316 | 100.040057 |
| 100.052854 | 100.164436 | 100.152513 | 100.092844 |
| 99.997385  | 99.7609543 | 99.9978063 | 100.154217 |
| 99.9482554 | 100.076668 | 100.222815 | 100.093957 |
| 100.04287  | 100.196481 | 100.155078 | 100.112877 |
| 99.9794765 | 100.086771 | 100.14653  | 99.9904501 |
| 99.7796297 | 99.9596961 | 100.099733 | 100.04753  |
| 99.7796297 | 99.9516454 | 100.27474  | 100.016843 |
| 100.124964 | 100.415429 | 100.02879  | 100.143564 |
| 100.058242 | 100.222686 | 99.9967379 | 100.194761 |
| 100.045247 | 99.8891341 | 99.8510056 | 100.240552 |
| 99.905782  | 99.6441403 | 100.259355 | 100.11097  |
| 100.055865 | 100.105714 | 99.8114741 | 100.075672 |
| 100.0042   | 99.9380697 | 100.160633 | 99.8845583 |
| 100.103885 | 100.065618 | 100.279442 | 100.192217 |
| 100.112127 | 100.276988 | 100.075587 | 100.227196 |
| 99.8615653 | 100.171698 | 99.99396   | 100.234828 |
| 99.7667926 | 99.9527504 | 100.315768 | 100.174409 |
| 100.044454 | 100.22237  | 99.7606173 | 100.082986 |
| 99.7067277 | 99.923389  | 99.9089139 | 99.9675545 |
| 99.6797856 | 99.8531427 | 100.000584 | 100.025747 |
| 99.8450831 | 100.194587 | 99.8918192 | 100.181723 |
| 99.9347843 | 100.274147 | 99.8315604 | 100.173455 |
| 99.7243193 | 99.9375962 | 99.9448128 | 100.134342 |
| 99.785969  | 99.775635  | 100.087554 | 100.012233 |
| 100.023852 | 99.968694  | 100.220251 | 100.065337 |
| 100.036213 | 100.035625 | 100.005499 | 100.133547 |
| 100.176946 | 99.6836045 | 100.310212 | 99.9206505 |
| 100.290103 | 99.7688472 | 100.04097  | 99.9713705 |
| 100.15777  | 99.7630065 | 100.126017 | 100.071856 |
| 100.171399 | 100.177539 | 99.5935166 | 100.092367 |
| 100.178848 | 99.7355394 | 99.6772807 | 100.074559 |
| 99.9889854 | 99.8351471 | 99.7845499 | 99.9538808 |
| 99.9614095 | 99.8834513 | 99.6437323 | 100.172183 |
| 99.9167173 | 100.036415 | 99.7165985 | 100.119873 |
| 100.04699  | 99.9827432 | 99.4422285 | 100.015254 |
| 100.042394 | 100.175013 | 99.4676569 | 100.180292 |

99.8433398 99.9066562 99.6873238 99.9223995  
99.7228929 99.8263071 100.220037 99.9758224  
99.703875 99.8217292 99.7232227 99.9618307  
99.8312951 99.8806098 99.8693824 100.064542  
99.8040361 100.014315 100.026867 100.014459  
99.9533268 100.012262 99.8072004 100.051982  
99.8715497 99.9076034 100.052082 99.896642  
99.6266939 99.9207055 100.132427 99.898232  
99.639848 99.7895264 100.097383 100.068835  
99.7545895 100.1848 99.8708782 100.188719  
99.7209911 100.040677 99.8294235 100.057388  
99.8420719 100.06546 99.4911621 100.01589  
99.7568082 99.8477756 99.5945851 99.9879061  
99.7574422 99.8971848 99.8678866 99.94768  
99.7346206 99.7792657 100.035842 99.7818464  
99.7140179 99.7475365 99.8708782 99.8209596  
99.6953169 99.7098087 100.058493 99.9901321  
99.7943686 99.9402797 100.045671 100.018433  
99.8839114 100.253468 99.8807076 100.052141  
99.8175071 100.067512 99.5685156 100.015095  
100.096437 100.01021 99.368294 100.074241  
100.013392 99.9213369 99.7512153 100.051187  
99.8748779 99.9667997 99.8420309 100.071538  
99.6542699 99.78558 100.025799 99.7599049  
100.339074 100.029153 100.76429 100.130367  
100.477746 100.403905 100.444192 100.194284  
100.228294 100.336185 99.9787885 99.9181066  
100.165535 100.070827 100.387993 100.03163  
100.178531 100.460576 100.02238 100.113036  
100.136374 100.153229 99.8168162 100.026383  
100.048733 100.059146 100.047381 99.9603997  
100.307536 100.245733 99.9777201 100.061204  
100.102776 100.08093 100.075801 99.9972869  
100.066008 100.173276 100.134991 99.9821822  
100.066959 100.191114 99.73583 100.049915  
100.099289 100.007527 100.114691 99.8001311  
100.129877 100.23342 99.9294275 99.9004579  
99.9910457 100.164279 100.261492 99.9006169  
100.116881 100.362231 99.8153204 99.8783574  
99.9243245 100.038309 99.8121151 99.947044  
99.9588737 99.9497511 99.9702411 99.8758135  
100.006102 100.181327 99.9651127 99.9158806  
100.043345 99.9584333 100.163625 99.9734374  
100.194538 99.9830589 100.137342 99.9247844  
100.108323 99.9445419 100.233927 99.8432192  
100.163475 99.8736641 100.186062 99.8804244

|            |            |            |            |
|------------|------------|------------|------------|
| 100.164584 | 99.9732718 | 100.316623 | 99.8842403 |
| 100.208326 | 99.9971082 | 100.155505 | 99.9085668 |
| 100.146042 | 99.8813991 | 100.051655 | 99.8363823 |
| 100.096912 | 99.9690097 | 99.8847676 | 99.7508421 |
| 99.9818537 | 99.8405142 | 100.408934 | 99.9103157 |
| 100.051586 | 99.8962377 | 99.9762243 | 99.8842403 |
| 100.191685 | 99.9608011 | 100.278159 | 99.9634206 |
| 100.220529 | 100.187641 | 99.9242991 | 99.9402071 |
| 100.107055 | 100.074458 | 99.7830541 | 99.9618307 |
| 100.31229  | 99.8155728 | 99.9798569 | 99.8785164 |
| 100.214982 | 99.7398015 | 100.524537 | 99.8093529 |
| 100.411342 | 99.9775339 | 100.21961  | 99.8449681 |
| 100.140812 | 99.7570079 | 100.070672 | 99.8270015 |
| 100.230989 | 99.795525  | 100.327948 | 99.7522731 |
| 100.226868 | 99.8327792 | 100.5021   | 99.8594368 |
| 100.387339 | 99.9139512 | 99.9363101 | 100.024718 |
| 100.422278 | 99.9412916 | 99.9049356 | 99.9842683 |
| 100.602372 | 100.012408 | 99.9459145 | 100.016119 |
| 100.398297 | 100.128882 | 100.026592 | 100.115173 |
| 100.384957 | 100.082735 | 100.255604 | 100.168045 |
| 100.471351 | 100.031057 | 100.017414 | 100.061824 |
| 100.008571 | 99.786415  | 100.262648 | 99.8829842 |
| 100.443241 | 100.219438 | 99.5941787 | 99.9915939 |
| 100.468016 | 100.050654 | 100.086139 | 100.021692 |
| 100.433236 | 100.136784 | 99.6915036 | 100.042714 |
| 100.369076 | 100.013199 | 99.7467825 | 99.9597436 |
| 100.32302  | 99.9792206 | 99.9211564 | 100.018507 |
| 100.891411 | 100.582291 | 99.6795514 | 100.141291 |
| 100.270612 | 100.111182 | 99.9273459 | 100.119473 |
| 100.487391 | 100.106125 | 99.6701604 | 100.211361 |
| 100.387498 | 99.9457167 | 99.5491445 | 100.145272 |
| 100.370188 | 99.8263984 | 100.159133 | 100.063894 |
| 100.57458  | 100.034534 | 99.7689794 | 100.007201 |
| 100.337313 | 99.6816361 | 99.8120927 | 100.030133 |
| 100.491679 | 100.065825 | 99.8684387 | 100.084756 |
| 100.244567 | 100.198893 | 100.079736 | 100.092719 |
| 100.557269 | 100.264636 | 99.6242726 | 100.104026 |
| 100.372252 | 100.270168 | 99.9977785 | 100.049721 |
| 100.261242 | 100.168708 | 99.8199897 | 100.185562 |
| 100.231703 | 100.218489 | 100.296156 | 100.159286 |
| 100.562669 | 100.447486 | 99.9973516 | 100.004653 |
| 100.026993 | 99.8319297 | 100.190081 | 100.032044 |
| 99.9969774 | 100.039749 | 99.8925565 | 99.9387223 |
| 100.203911 | 100.146898 | 99.6861678 | 100.057683 |
| 99.8591279 | 99.7506985 | 100.157852 | 100.035707 |
| 99.8489639 | 99.7054998 | 100.091048 | 99.9871349 |

100.170719 99.8941965 99.9661905 100.019941  
99.8958137 99.7973195 100.285912 99.980924  
99.8799324 99.7758265 100.411623 99.9485959  
100.084166 100.083683 99.9813442 100.013093  
99.8381646 99.8874009 100.262434 100.070423  
99.8127545 99.7840444 100.185385 100.023603  
100.167066 100.057607 99.7849868 100.043988  
99.9390107 99.7164044 99.9258519 99.9769428  
99.8511873 99.5920289 100.482909 100.045102  
99.7479589 99.8946706 99.8746282 99.99669  
99.8213304 99.9199566 100.163829 100.032362  
99.7473237 99.9869645 100.04516 100.093356  
100.058438 100.150849 99.5600295 100.037299  
99.8880318 100.056975 99.8840192 99.840464  
99.7797215 99.6609332 100.244292 99.8942911  
100.016829 99.7122954 100.238103 99.9141976  
99.9644208 100.197154 100.186239 100.109918  
99.761458 100.115133 100.005462 100.187155  
100.097188 100.28692 99.8334359 100.021215  
99.9334523 100.034376 100.203313 100.056887  
99.840388 99.8466272 100.072266 99.9535328  
99.7603463 99.8496299 99.7290676 99.8664221  
99.7841682 99.8039571 100.32625 99.791096  
99.7478001 99.8730195 99.9745144 99.8291572  
99.9911014 100.244091 99.7228781 99.8696071  
99.7101615 99.7894177 100.241518 99.8202391  
99.8659568 99.7636576 100.083578 100.080934  
99.8241891 100.249149 99.6693067 100.079501  
99.8513461 100.128882 100.121142 99.9350596  
99.8181542 99.7413743 100.26841 100.000193  
99.8511873 100.007667 100.210997 99.8930171  
99.9836372 100.207269 99.7719675 100.044784  
99.8426114 99.8380932 100.060527 100.033636  
99.9388519 99.8279788 99.9416459 99.9320338  
99.788615 99.934338 99.9371638 99.9586288  
99.7674929 99.7601807 100.26713 99.8635555  
100.024611 99.9352862 100.120929 99.8848953  
100.201846 99.9171119 100.017414 99.837279  
100.165795 100.235557 100.171939 100.165178  
99.9884015 100.22007 99.7591615 100.108644  
99.7573289 99.8154938 100.106202 100.038414  
99.9178886 99.947139 100.165109 100.150049  
99.9042307 100.157487 99.7173289 100.073768  
99.8448347 99.9616785 99.9932964 99.7606789  
99.8667509 100.013357 100.281643 99.8689701  
99.7435121 100.025842 99.8415463 100.153871

99.7706691 100.02837 100.04388 100.031885  
99.6151914 99.9542507 100.348447 99.8969984  
99.8122781 100.05255 100.18816 99.9799685  
99.5753294 100.033427 100.389213 99.8711996  
99.7813096 99.8576898 100.528157 99.8882396  
99.7433533 100.067722 100.367016 99.9350596  
99.9078834 100.05255 100.02339 99.8468341  
99.9334523 100.187988 99.7344034 100.07966  
99.9402813 99.9947083 99.8052629 100.110236  
99.8702448 99.7469056 100.147821 99.7149737  
100.062408 100.037694 100.237249 99.9903199  
99.8380058 100.234135 100.049002 99.9993972  
100.030328 100.304936 99.5995144 99.9761465  
99.8175189 99.9363925 99.767272 99.9683432  
99.850552 99.8142295 99.8466686 99.8995464  
99.9323406 99.9885448 99.8795372 100.053861  
99.6101094 100.029318 99.8492298 100.05832  
99.8130722 99.976534 100.141845 99.9589473  
100.180247 100.013989 100.338416 100.009112  
100.043033 100.289764 99.6957723 100.108803  
99.7873445 100.122561 99.5918309 99.9337855  
99.8273653 99.9940761 99.7595884 100.020896  
99.7191613 99.5972753 100.12341 99.9901016  
99.6061245 99.7351854 100.347152 99.8834971  
99.6262587 99.8164482 100.248637 99.8330588  
99.6308563 99.856054 100.073191 99.8570846  
100.114711 99.7642191 100.214659 99.7426837  
99.8371126 99.9824452 99.8515854 99.8559709  
99.556344 100.035779 99.7812787 99.8615397  
99.7407223 99.8966065 99.9926263 99.8796784  
99.9767835 100.102683 100.023826 99.9439594  
99.9404786 100.248956 99.9900619 100.077454  
99.7835272 100.199882 100.108237 100.014446  
99.7391369 99.9933329 100.116358 99.8553344  
99.9669543 100.113255 100.008654 99.7614588  
99.6657344 100.20509 99.8432512 100.03879  
99.5195635 100.193729 99.7255034 99.8841335  
99.6449661 99.8210242 99.9554428 99.7733921  
99.7118686 99.7795249 100.112725 99.8217619  
99.7572101 100.045878 100.065497 100.014605  
99.804137 99.7135679 100.0281 99.8359228  
99.7840028 99.832543 100.597392 99.8578802  
100.087284 99.88635 100.242653 99.9393451  
100.483784 100.155858 99.9349278 100.098775  
100.391516 100.030887 100.251629 100.05836  
100.123906 100.333059 100.379634 100.054064



|            |            |            |            |
|------------|------------|------------|------------|
| 100.274833 | 100.464499 | 99.7220843 | 100.12646  |
| 100.470943 | 100.446038 | 99.9577935 | 100.271251 |
| 100.083479 | 100.327378 | 100.045623 | 99.8324224 |
| 100.374077 | 100.334163 | 99.8312841 | 100.072999 |
| 100.265162 | 100.1972   | 99.9475359 | 100.014127 |
| 100.258503 | 99.9324252 | 99.8855635 | 99.9173878 |
| 99.9954909 | 100.136292 | 100.014851 | 100.044836 |
| 100.226955 | 100.191204 | 100.093064 | 99.8941575 |
| 99.9564908 | 100.174636 | 99.8071362 | 99.9484145 |
| 100.176223 | 100.34158  | 99.4263259 | 100.075703 |
| 99.6781002 | 99.8746734 | 99.6199365 | 99.8984535 |
| 99.8193565 | 99.8314384 | 99.965914  | 99.8714046 |
| 99.5826611 | 99.8614189 | 100.146489 | 99.8666313 |
| 99.8314053 | 100.021578 | 99.9417661 | 99.9980572 |
| 99.7665638 | 100.04714  | 100.003098 | 99.9732358 |
| 100.133735 | 100.235543 | 100.187519 | 100.09957  |
| 99.5547586 | 100.082959 | 100.050539 | 99.9515967 |
| 99.5813928 | 99.8352254 | 99.9240291 | 99.9255025 |
| 99.4605878 | 99.6493466 | 100.22513  | 99.9781683 |
| 99.3960633 | 99.7913593 | 100.286034 | 99.889066  |
| 99.612466  | 99.832543  | 99.7799965 | 99.9095913 |
| 99.8049297 | 99.8756202 | 100.04776  | 99.903386  |
| 99.9985031 | 100.291086 | 100.00844  | 100.071089 |
| 100.057796 | 100.126983 | 99.7094761 | 100.058042 |
| 99.9308079 | 100.070966 | 99.8248731 | 100.150008 |
| 99.9686982 | 99.9805517 | 100.031733 | 100.114527 |
| 99.6776246 | 100.080592 | 99.9560839 | 99.8435602 |
| 100.029101 | 100.086114 | 100.009508 | 99.9522331 |
| 99.8141248 | 99.9870212 | 99.8765881 | 99.8591531 |
| 100.085857 | 100.028836 | 99.9379195 | 100.020969 |
| 99.9920031 | 100.125878 | 99.792391  | 99.943482  |
| 99.8394907 | 99.7366055 | 99.6137393 | 99.9644847 |
| 99.8060394 | 99.8257579 | 99.8340622 | 100.007922 |
| 100.054467 | 99.7811028 | 100.178971 | 99.9601887 |
| 100.004369 | 99.9919128 | 99.7819198 | 100.095433 |
| 99.9797957 | 99.6212597 | 100.066138 | 100.085409 |
| 99.9319176 | 100.010532 | 99.9706154 | 100.146826 |
| 99.9997714 | 99.9898615 | 100.152259 | 100.055974 |
| 99.9206615 | 99.932583  | 99.778928  | 100.044359 |
| 100.08982  | 99.9322674 | 99.9498866 | 100.107207 |
| 100.010869 | 99.8808273 | 100.462335 | 100.007763 |
| 99.9173322 | 99.9994868 | 100.15867  | 99.952074  |
| 99.8413931 | 99.8740422 | 100.066993 | 100.080636 |
| 100.091881 | 100.053136 | 99.7725171 | 99.9576429 |
| 100.034015 | 99.6274136 | 100.250133 | 99.9283665 |
| 100.125015 | 99.8319118 | 100.304839 | 99.8997264 |

|            |            |            |            |
|------------|------------|------------|------------|
| 99.9921616 | 99.8806695 | 100.027673 | 100.009036 |
| 100.034808 | 99.9297428 | 100.147344 | 99.9476189 |
| 100.106467 | 99.9215376 | 100.169782 | 99.9956705 |
| 100.002942 | 99.9679284 | 100.347365 | 99.9358447 |
| 100.16893  | 100.030887 | 100.170851 | 100.001399 |
| 100.059698 | 99.7834697 | 100.080456 | 99.8101468 |
| 100.029893 | 99.9095454 | 99.9806592 | 99.9985345 |
| 100.089345 | 99.8986578 | 100.162089 | 100.062497 |
| 99.9771006 | 99.855265  | 100.089004 | 100.137598 |
| 100.278638 | 99.9701375 | 100.189229 | 100.09782  |
| 100.197308 | 99.9370012 | 100.229404 | 100.065361 |
| 100.03132  | 100.073649 | 100.379206 | 99.9247069 |
| 100.291796 | 100.222289 | 99.650068  | 100.18008  |
| 100.215857 | 99.9163305 | 100.14713  | 100.115322 |
| 100.292272 | 100.158541 | 100.03558  | 100.086205 |
| 100.219503 | 99.9392103 | 100.101399 | 100.144758 |
| 100.190491 | 99.9108077 | 99.9834373 | 99.9972616 |
| 100.166394 | 100.002958 | 99.826369  | 100.016196 |
| 100.340467 | 100.076963 | 99.8699635 | 100.025424 |
| 100.261833 | 100.028363 | 99.9612126 | 100.111344 |
| 100.117564 | 99.9259558 | 100.221497 | 100.101798 |
| 100.275467 | 100.017317 | 99.8353444 | 100.211744 |
| 99.9723445 | 99.7626412 | 100.284111 | 99.9813505 |
| 100.244235 | 99.93637   | 99.9813003 | 100.051041 |
| 99.916381  | 99.8121878 | 100.022971 | 100.047223 |
| 100.074601 | 99.8929773 | 99.796665  | 99.8796784 |
| 100.133735 | 99.8988156 | 99.8453882 | 100.071885 |
| 100.073174 | 100.001065 | 99.7056295 | 100.017151 |
| 100.299247 | 100.162486 | 99.5464243 | 100.192173 |
| 100.397699 | 100.167377 | 99.8870593 | 100.144758 |
| 100.364882 | 100.069862 | 99.7690979 | 100.097979 |
| 100.37971  | 100.14061  | 99.9294011 | 100.030732 |
| 100.541147 | 100.140136 | 99.7602801 | 100.001472 |
| 100.326426 | 99.9352934 | 99.797649  | 100.091796 |
| 100.746987 | 100.34103  | 99.5093745 | 100.440214 |
| 100.319448 | 100.012998 | 99.7587853 | 100.200567 |
| 100.363217 | 100.272328 | 99.625752  | 100.050133 |
| 100.140884 | 99.8779627 | 99.5232544 | 100.023099 |
| 100.333721 | 100.030845 | 99.8072582 | 100.064604 |
| 100.407462 | 100.244058 | 99.7884669 | 99.97412   |
| 100.067936 | 99.8545882 | 100.265721 | 99.8491287 |
| 100.459159 | 100.072066 | 99.9744574 | 100.088457 |
| 100.202573 | 100.126712 | 99.8787929 | 100.202158 |
| 100.299149 | 100.293176 | 100.159807 | 100.231418 |
| 100.328963 | 100.241057 | 100.058591 | 100.201681 |
| 99.8685973 | 99.8629588 | 100.220879 | 99.9677591 |

100.026863 99.8853857 99.9584421 100.060628  
100.0451 100.040637 99.8136643 100.117717  
100.134541 99.9973621 99.7502439 99.9642606  
99.7211154 99.6161051 100.391281 99.8899974  
99.7114418 99.7903083 100.237535 100.016261  
99.7985037 99.9713027 100.157672 99.9284807  
99.8368808 99.862327 99.7049741 99.9049454  
99.8035784 99.6596954 100.0477 99.8892023  
99.9287002 99.7863599 100.282164 99.8352938  
99.847823 99.5872029 99.9334583 99.9062176  
99.9626369 99.7527196 99.9823582 100.091001  
99.7699588 99.9084443 99.8264765 99.9693494  
100.060324 99.9521925 99.6029036 100.030414  
100.127722 99.9766725 99.5755709 99.952016  
100.133589 100.091018 99.7938053 99.9528111  
99.8665357 99.9814106 100.218103 100.007515  
99.8403696 100.093229 99.9447758 99.8053977  
100.107423 100.26759 99.6714488 100.062695  
99.9591481 100.105232 100.07845 100.006561  
99.6979623 99.9790416 100.591792 99.786474  
99.9228326 100.13524 100.38701 99.9065357  
100.229214 100.379251 100.038732 100.071123  
100.018458 99.9381362 100.235399 99.9256183  
100.128039 99.9935717 99.8920322 100.03757  
100.114083 99.884596 100.016097 99.9475633  
99.8730376 99.8684865 100.204436 99.9030372  
99.8654257 99.9926241 100.006701 99.8403825  
99.9018997 99.9776202 100.170698 99.8330675  
99.7247628 99.9120768 99.905485 99.8025353  
99.5983723 99.5246603 100.157458 99.6872443  
99.6656114 99.65322 100.401958 99.7510121  
99.7109661 99.9086022 100.154469 99.836725  
99.461674 99.6487978 100.370141 99.7090303  
99.8249871 99.8680127 99.9200055 100.054744  
99.7934291 99.9465068 99.9268387 99.9512208  
99.8291102 99.8586945 100.148063 99.9213247  
99.8176923 99.8392684 99.9003602 100.083209  
99.8151549 99.6375844 99.9680513 99.9062176  
99.9810325 99.7568259 100.245649 100.134573  
100.113132 99.8541144 99.8990789 100.31236  
100.130735 100.072066 99.6644021 100.146977  
99.9475715 99.7599846 100.070122 100.129166  
99.7713861 99.5969949 100.327861 100.059356  
100.178944 99.8528509 99.8442 100.067943  
100.18053 100.042374 99.6923754 100.146977  
99.9261629 99.9146038 100.063075 99.9311841

99.8907989 99.9847273 100.000295 99.95949  
100.06524 100.272802 99.6784955 100.146659  
99.9810325 100.089755 99.7895346 100.168445  
100.125343 100.231423 100.058377 100.064285  
99.8977765 100.06559 100.09959 99.9690313  
100.063971 100.13066 100.092116 100.156041  
100.366864 100.31813 99.8576528 100.173057  
100.207647 100.367406 99.9808635 99.9765053  
100.158169 100.339451 99.8262629 100.045839  
100.104727 100.08628 99.7382858 100.097521  
99.8573379 99.8782785 100.03681 99.8208228  
99.8343434 99.6304773 100.445519 99.9268905  
100.331183 100.181199 100.555277 100.284372  
100.681334 100.555191 100.076741 100.297412  
100.422051 99.9619845 99.9099693 100.036139  
100.200987 99.6636438 100.183296 99.7694587  
100.250782 100.054535 99.8858397 99.9990865  
100.109802 99.8553779 100.243941 99.9245051  
100.088393 99.8847539 99.9806499 99.9602851  
100.076816 99.9495076 99.9842801 99.9925666  
100.050967 100.117077 100.107277 100.022622  
100.150399 100.149612 99.7910294 100.04234  
99.8695488 99.8237907 99.8542362 99.9175082  
100.021471 99.9733559 99.8952353 100.015625  
99.8795395 99.9010213 100.006915 99.8480156  
100.122964 100.113445 100.015243 100.066512  
100.199401 100.196361 99.7389264 100.143637  
99.9347263 99.9839376 100.099163 99.9486765  
99.9738963 99.995151 100.223014 99.9086029  
99.8490916 99.9649853 99.9283335 99.8996977  
99.660061 100.002574 99.9466976 99.8281378  
99.9821426 100.424894 99.8574393 100.173693  
99.9564522 100.362036 99.9738168 100.132029  
99.9440827 100.392202 99.7034793 100.052518  
99.7805839 100.163195 99.8017062 100.070169  
99.7602853 100.175198 100.248211 99.9402483  
100.042721 100.446374 99.9992276 100.124237  
99.882394 100.269012 99.8572257 100.077166  
100.21177 100.320183 99.678282 100.143797  
99.8824442 99.6342589 100.314124 100.403795  
99.6936376 99.4895762 100.019831 100.198586  
100.087594 99.8135896 99.9129126 100.208298  
99.9571574 99.7318419 100.197437 100.186931  
99.6716905 99.5928437 100.14309 100.17708  
100.055374 99.6718845 100.086789 100.110897  
99.728815 99.4596652 100.149839 100.218011

|            |            |            |            |
|------------|------------|------------|------------|
| 99.8159805 | 99.5937911 | 100.227808 | 100.086477 |
| 99.8503797 | 99.6617337 | 100.450526 | 100.242708 |
| 99.8243858 | 99.5617145 | 100.220171 | 99.9903245 |
| 99.8250084 | 99.5150209 | 100.075777 | 100.068995 |
| 99.7507621 | 99.4431532 | 100.400263 | 100.02959  |
| 99.851625  | 99.5829635 | 99.8020866 | 100.101462 |
| 99.9834627 | 99.5527818 | 100.116271 | 100.018213 |
| 99.9408139 | 99.5408716 | 100.087677 | 100.245622 |
| 100.204489 | 99.6574027 | 100.051445 | 100.21038  |
| 99.7762891 | 99.4918771 | 100.213244 | 100.123107 |
| 99.6945715 | 99.3488185 | 100.03031  | 100.02071  |
| 100.030625 | 99.5801213 | 100.167422 | 100.214265 |
| 99.8920946 | 99.5094718 | 100.44946  | 99.9932382 |
| 99.9269608 | 99.567805  | 99.9566037 | 100.104514 |
| 100.140828 | 99.6569967 | 100.178078 | 100.124356 |
| 99.965407  | 99.5301794 | 100.297962 | 100.119222 |
| 100.151101 | 99.6407554 | 100.079507 | 100.17819  |
| 100.086505 | 99.6104384 | 100.347159 | 100.266711 |
| 99.818471  | 99.3092981 | 100.369537 | 100.0196   |
| 99.2903416 | 99.0892288 | 100.08377  | 100.169449 |
| 99.6749592 | 99.4419352 | 100.287128 | 100.035834 |
| 99.4262263 | 99.5596844 | 100.406835 | 100.368275 |
| 99.2543858 | 99.7942354 | 100.078086 | 100.165703 |
| 99.2486267 | 99.6529364 | 99.7921406 | 99.8661446 |
| 99.5348719 | 99.9352638 | 99.8855613 | 100.136843 |
| 99.6407157 | 100.103902 | 100.246634 | 99.9069367 |
| 99.8197162 | 100.282827 | 100.107569 | 100.067052 |
| 99.7398664 | 99.9202407 | 100.224256 | 99.8887606 |
| 99.895986  | 99.8693513 | 99.905986  | 100.071909 |
| 100.057398 | 100.016876 | 100.313592 | 100.074684 |
| 99.7289707 | 99.9990108 | 100.510201 | 99.9788084 |
| 99.8156692 | 99.9781679 | 99.8546579 | 100.177219 |
| 99.829211  | 99.8359214 | 100.024094 | 100.017103 |
| 99.6377583 | 99.7916639 | 100.082881 | 100.208576 |
| 99.7020428 | 99.9720774 | 99.8651367 | 99.8895931 |
| 99.7987031 | 100.073044 | 99.5909131 | 99.8721108 |
| 99.914353  | 100.097541 | 99.6688821 | 99.9678473 |
| 99.7378429 | 99.7528202 | 100.229229 | 99.7201813 |
| 99.8450876 | 99.7954535 | 99.9102486 | 99.8991668 |
| 99.8646998 | 99.9563775 | 100.027646 | 99.8353425 |
| 99.7599456 | 100.019448 | 99.8168278 | 99.8698908 |
| 100.15219  | 100.203786 | 100.125862 | 100.04624  |
| 99.8147353 | 99.9621973 | 100.028356 | 99.7652745 |
| 99.8986321 | 100.00253  | 99.9406192 | 99.947035  |
| 100.330879 | 100.210147 | 99.9860863 | 100.134345 |
| 100.05086  | 100.080082 | 100.249121 | 99.9337151 |

|            |            |            |            |
|------------|------------|------------|------------|
| 99.7901422 | 100.028787 | 100.100464 | 99.9758947 |
| 99.7653934 | 100.09294  | 99.8598085 | 99.9822771 |
| 99.8720155 | 100.140175 | 99.9892832 | 99.8134202 |
| 100.253209 | 100.188357 | 99.942928  | 100.041106 |
| 100.203556 | 100.301911 | 99.910071  | 100.090917 |
| 99.9213573 | 100.211907 | 100.02587  | 99.8654509 |
| 99.8762181 | 99.9252484 | 99.5722645 | 100.022653 |
| 100.086505 | 99.9917023 | 99.6839786 | 100.14822  |
| 99.925093  | 100.08333  | 99.9230362 | 99.8170277 |
| 100.170402 | 100.207034 | 100.028534 | 100.186792 |
| 100.382245 | 100.250886 | 100.004913 | 100.300289 |
| 100.103627 | 100.068172 | 100.047893 | 99.7316974 |
| 100.165732 | 100.261037 | 99.76177   | 99.9573024 |
| 99.891472  | 100.052742 | 99.9180632 | 100.027509 |
| 99.8892929 | 99.8724642 | 100.008997 | 99.8927843 |
| 99.9047025 | 99.9922436 | 99.8443568 | 100.02848  |
| 99.9075043 | 100.121497 | 99.9450593 | 100.011969 |
| 100.256322 | 100.388801 | 99.7797082 | 99.9291364 |
| 100.421469 | 100.597908 | 100.022318 | 100.194978 |
| 100.222856 | 100.571786 | 100.028889 | 100.186792 |
| 100.017862 | 100.378651 | 99.8985266 | 99.9166491 |
| 100.348779 | 100.370259 | 99.7438318 | 99.9958744 |
| 100.196707 | 100.169003 | 100.021785 | 99.7482085 |
| 100.186278 | 100.138415 | 99.9113142 | 99.8120327 |
| 100.142073 | 100.266044 | 100.158186 | 99.9782534 |
| 100.323719 | 100.376485 | 100.057484 | 99.701589  |
| 100.527002 | 100.509122 | 99.8088356 | 99.9380163 |
| 100.279047 | 100.28215  | 99.910959  | 99.8038466 |
| 100.056153 | 100.160882 | 99.7129284 | 99.6566345 |
| 100.330568 | 100.425209 | 99.5523727 | 99.9767272 |
| 100.344732 | 100.334258 | 99.8228665 | 99.7366923 |
| 100.258968 | 100.289594 | 99.7276697 | 99.7937179 |
| 100.422403 | 100.489091 | 99.7496928 | 100.009611 |
| 100.415554 | 100.383252 | 99.7845036 | 99.8425574 |
| 100.273599 | 100.308542 | 99.7411677 | 99.9942095 |
| 100.384424 | 100.402065 | 99.7797082 | 99.9951807 |
| 100.359986 | 100.278767 | 100.293167 | 99.809119  |
| 100.536963 | 100.385418 | 99.8889358 | 99.8648959 |
| 100.653859 | 100.547018 | 99.9610438 | 100.109648 |
| 100.24994  | 100.17198  | 100.150372 | 99.8633697 |
| 99.9104617 | 99.9524525 | 99.6161332 | 99.8980568 |
| 100.272821 | 100.50831  | 99.5601873 | 100.154048 |
| 100.143007 | 100.354153 | 100.052511 | 99.8019041 |
| 99.8567615 | 100.040832 | 100.004557 | 99.948145  |
| 100.086505 | 100.292978 | 99.9106038 | 100.072464 |
| 100.286207 | 100.275112 | 99.8352989 | 99.9413463 |

|            |            |            |            |
|------------|------------|------------|------------|
| 100.403258 | 100.349416 | 100.033685 | 100.042771 |
| 99.8963824 | 100.37501  | 100.138392 | 99.9131501 |
| 99.6478593 | 100.194078 | 99.9467614 | 99.5830907 |
| 99.9253742 | 100.175714 | 99.5436459 | 99.5912592 |
| 99.809097  | 100.15033  | 99.5069506 | 99.7396751 |
| 99.8224301 | 100.084438 | 99.3529017 | 99.8190057 |
| 99.9352965 | 100.256729 | 99.2415751 | 99.69108   |
| 99.9070799 | 100.082413 | 99.4670645 | 99.7223692 |
| 99.8683209 | 99.9769588 | 99.7723262 | 99.5720149 |
| 100.33312  | 100.315195 | 99.4103377 | 99.6919107 |
| 100.09886  | 100.14844  | 99.5879637 | 99.7706874 |
| 99.6481694 | 99.8696145 | 99.6843995 | 99.766534  |
| 100.017621 | 99.9688573 | 99.8444757 | 99.5074983 |
| 100.236067 | 100.224998 | 99.8595438 | 99.7701336 |
| 99.9185526 | 100.171394 | 99.6595814 | 99.846003  |
| 100.143355 | 100.325456 | 99.6211135 | 99.6743278 |
| 100.179479 | 100.492751 | 99.4917053 | 99.6902493 |
| 99.9506451 | 100.398505 | 99.6709268 | 99.7370446 |
| 99.7258425 | 100.264155 | 99.5766184 | 99.3984015 |
| 99.7501832 | 100.086598 | 99.2750795 | 99.7146161 |
| 99.8588636 | 100.215952 | 99.6523133 | 99.5728456 |
| 100.110643 | 100.328697 | 99.7531808 | 99.5933359 |
| 100.206765 | 100.277523 | 100.011465 | 99.6819424 |
| 98.7461683 | 99.0625745 | 100.609934 | 100.295958 |
| 96.1156679 | 97.5201923 | 100.091415 | 99.6739124 |
| 99.95018   | 100.603876 | 99.8776254 | 99.7094935 |
| 99.9822725 | 99.9568401 | 100.48478  | 99.4568264 |
| 98.8768639 | 98.9568505 | 99.6212908 | 100.44119  |
| 102.565487 | 101.392958 | 99.9721112 | 100.867886 |
| 99.0377915 | 98.5960656 | 99.7262355 | 97.8403109 |
| 101.145355 | 100.234585 | 100.217632 | 100.564824 |
| 98.5469467 | 98.3122446 | 99.9825702 | 99.7216769 |
| 99.0562409 | 98.9823701 | 100.231459 | 99.6834653 |
| 99.4539089 | 99.3149348 | 100.140874 | 99.5905669 |
| 99.8673906 | 99.7873847 | 100.122969 | 99.6779274 |
| 97.7751761 | 97.3187361 | 100.337468 | 99.863032  |
| 97.7503703 | 98.019377  | 100.305559 | 99.3567287 |
| 101.31853  | 100.948728 | 100.30485  | 100.516367 |
| 100.435599 | 100.437662 | 100.41724  | 100.765157 |
| 100.359011 | 100.583488 | 100.526971 | 100.355629 |
| 99.7894074 | 100.081603 | 100.491162 | 100.050352 |
| 99.9832027 | 100.122515 | 99.9573976 | 100.164848 |
| 99.5294116 | 99.7202776 | 100.130946 | 99.9621606 |
| 99.6534406 | 99.889193  | 100.345268 | 99.7910392 |
| 99.8396391 | 100.342064 | 99.88188   | 100.172878 |
| 99.6633629 | 99.761325  | 100.81681  | 99.8000383 |

|            |            |            |            |
|------------|------------|------------|------------|
| 99.9551412 | 100.030158 | 100.238728 | 99.9866658 |
| 99.6410377 | 99.7753675 | 100.002602 | 99.8748001 |
| 99.7463073 | 100.002478 | 100.016961 | 100.002726 |
| 100.070643 | 100.09254  | 100.050111 | 100.006049 |
| 100.530481 | 100.54028  | 100.139456 | 100.131067 |
| 100.364747 | 100.220272 | 100.262837 | 100.163464 |
| 99.5016601 | 99.5315137 | 99.9721112 | 99.9859736 |
| 99.5232101 | 99.7520083 | 100.049933 | 100.084271 |
| 99.8342129 | 100.266046 | 99.8127441 | 100.15308  |
| 100.293275 | 100.421594 | 99.9416205 | 100.053951 |
| 100.179169 | 100.286029 | 99.9522568 | 99.8408804 |
| 101.179463 | 101.195823 | 100.417772 | 100.842688 |
| 101.855886 | 101.469517 | 100.986104 | 100.168448 |
| 100.095759 | 100.086328 | 99.2101981 | 99.9116272 |
| 101.103495 | 100.710141 | 99.5328323 | 100.53215  |
| 100.678075 | 100.488836 | 100.182887 | 100.374043 |
| 101.492171 | 100.912272 | 100.038588 | 100.460434 |
| 101.270004 | 100.579842 | 99.8852481 | 100.221889 |
| 100.492807 | 99.8688043 | 100.199551 | 100.008679 |
| 100.114673 | 99.8648886 | 99.9651976 | 100.143112 |
| 100.50769  | 100.098076 | 100.381608 | 100.24404  |
| 100.837763 | 100.668418 | 100.043197 | 100.288897 |
| 100.387847 | 100.178145 | 100.245464 | 100.197937 |
| 100.202114 | 99.9752034 | 99.8528074 | 100.007018 |
| 99.7783998 | 99.7528185 | 99.896239  | 100.179108 |
| 100.201959 | 100.060269 | 99.9896611 | 100.1852   |
| 100.132968 | 99.8943239 | 99.7168402 | 100.211228 |
| 100.33498  | 100.034614 | 100.214087 | 100.114453 |
| 100.544434 | 100.271852 | 99.7411264 | 100.182431 |
| 100.413894 | 100.044471 | 100.104356 | 100.099501 |
| 100.24754  | 99.933886  | 100.102583 | 100.140897 |
| 100.277927 | 100.115359 | 99.9882429 | 100.175509 |
| 100.182734 | 100.048657 | 99.8671664 | 100.183539 |
| 100.260098 | 99.9965373 | 99.9363023 | 100.030554 |
| 100.454358 | 100.230939 | 99.9490659 | 100.205136 |
| 100.293895 | 100.257404 | 100.162324 | 100.18963  |
| 99.7332843 | 99.9029655 | 100.056492 | 100.099778 |
| 99.7211914 | 99.6288662 | 100.448794 | 100.051875 |
| 99.8911112 | 99.989381  | 99.7827852 | 100.27256  |
| 100.236687 | 100.038125 | 100.009515 | 100.350922 |
| 100.322422 | 100.111443 | 100.032206 | 100.338738 |
| 100.154208 | 100.019356 | 100.037702 | 100.131205 |
| 99.9174674 | 99.889328  | 99.9604113 | 100.135359 |
| 99.5590235 | 99.8146596 | 100.00012  | 99.914673  |
| 99.2796481 | 99.3951392 | 99.9664385 | 99.8606784 |
| 99.5692559 | 99.6676182 | 100.013415 | 99.9376554 |



99.5604188 99.8638084 99.9595249 99.9751747  
99.8235154 100.019356 100.412986 99.9573149  
99.9627379 100.137503 99.8572392 100.115422  
99.9559164 100.128726 99.9547386 99.8933521  
100.030799 100.276848 99.8625574 100.105316  
100.195447 100.212036 100.050465 100.164156  
99.7762293 99.9826298 99.7540672 100.013248  
99.9348314 100.173149 99.8591892 100.069319  
100.19376 100.564241 100.281314 100.269383  
100.300316 100.493382 100.368282 100.001686  
100.407956 100.712179 100.316989 100.199483  
100.445281 100.721239 100.226826 100.053315  
100.271044 100.59345 100.222921 100.058298  
100.710432 101.010219 99.9563365 99.9258336  
100.213894 100.652815 99.8677709 99.942582  
100.139708 100.294463 100.204107 99.964867  
100.004809 100.056599 99.9575789 100.098439  
100.244095 100.292705 100.131515 100.123215  
100.274761 100.275396 100.2964 100.03712  
100.21343 100.285132 100.119624 99.9183591  
99.9735241 100.201292 99.9717778 100.081137  
99.9041389 100.046322 100.278297 99.8725433  
99.9185425 100.062549 100.189553 100.002239  
99.8556622 100.385877 100.472821 100.276719  
98.5814837 98.3320493 99.5520229 99.1401822  
99.0109595 99.4432094 98.6651242 99.8605011  
97.765898 98.6871554 100.39881 99.1543007  
99.1182897 99.3919583 100.159736 100.154636  
99.866039 99.9346242 100.07898 99.7781433  
99.9118828 100.127864 100.323733 99.8533034  
100.025873 100.360319 100.001241 99.958223  
100.234183 100.596966 100.053421 100.020234  
100.057778 100.321509 100.055196 100.089995  
99.9397607 100.369244 99.930956 99.9753867  
100.270115 100.452408 99.8081355 100.081552  
100.390919 100.721104 99.9130299 100.191178  
100.071562 100.350177 100.534942 99.9328928  
100.136765 100.121778 100.147312 99.9297092  
100.076053 99.9401685 100.270665 100.065219  
100.077912 100.277019 99.9066404 100.040027  
100.044768 100.23307 100.118204 100.081137  
99.5308837 99.5760022 100.43271 99.8185609  
99.973679 100.166809 99.8461176 100.115326  
99.9073913 99.8340153 100.118736 99.8766958  
99.9725948 99.6524055 100.188311 100.062174  
99.9733692 99.8030483 100.138615 100.024248

99.9908704 99.699194 100.249721 99.9896435  
100.196393 100.010216 100.252206 100.163633  
99.9019706 100.063901 100.134533 100.05899  
99.6021275 99.5695113 100.060876 99.9805081  
99.7433759 99.3634254 100.200558 99.9594688  
100.083023 99.8468619 99.7264919 100.007638  
99.8008355 99.7109588 100.043127 99.8783568  
99.8392451 99.4699843 99.6652591 99.9227884  
100.218695 99.9758684 99.7224097 100.121139  
99.8971694 99.7918245 100.00337 100.143147  
99.6818895 99.4154878 100.036738 100.07477  
99.7641295 99.4637639 99.9098351 100.040996  
99.5841617 99.5935817 99.4018696 100.162526  
98.9933034 98.8709288 100.452765 98.3012405  
99.9425485 99.7059554 100.071348 100.038089  
99.9727497 99.7388155 100.111637 100.23907  
100.179047 99.8588971 99.8936839 100.071724  
100.593344 100.397912 99.8727405 100.16211  
100.274761 100.289189 100.142697 100.273951  
99.8558171 99.895814 99.5394214 100.082659  
100.139708 100.046186 99.2598806 99.9867368  
100.539757 100.524619 100.021829 100.141902  
100.110591 100.518129 99.7976638 100.085566  
100.003106 99.8841845 100.214934 99.7085199  
100.075588 99.9612639 99.8555243 100.073524  
100.293656 100.299331 99.6450257 100.385238  
100.082403 100.090676 99.924389 100.10799  
99.6453383 99.7151508 99.8803724 99.9990559  
99.6030567 99.6486191 99.6258572 100.125015  
100.025253 99.8601141 99.724717 100.215262  
99.5291801 99.4952717 100.018279 99.9122688  
100.140172 99.8603846 99.6677439 100.130967  
100.127937 99.6718782 99.7321714 100.229519  
99.9978399 99.6689032 99.8132826 100.081829  
99.8895804 99.7344882 99.8739829 100.082521  
100.555399 100.26566 100.279539 100.0774  
100.463712 100.008458 100.04082 100.331809  
100.104705 99.7454416 100.309889 100.072001  
100.197013 100.140575 99.7511624 99.7987673  
100.272593 100.357614 100.022539 99.950887  
100.202743 100.350853 100.380884 100.038505  
100.285448 100.108256 100.194523 99.7750981  
100.664278 100.740171 99.7925167 100.170277  
100.684103 100.701226 100.012955 100.230073  
100.071252 99.9946649 100.212449 99.9856295  
99.9371278 99.8557868 99.8313862 99.893721

|            |            |            |            |
|------------|------------|------------|------------|
| 100.319211 | 100.094733 | 99.9810071 | 100.114772 |
| 100.202123 | 100.139223 | 100.366685 | 100.111588 |
| 99.8705304 | 99.9121765 | 100.158138 | 99.8162078 |
| 100.074969 | 100.226038 | 99.3711644 | 99.9917198 |
| 100.412757 | 100.293381 | 99.8496673 | 100.099961 |
| 99.9910252 | 99.9630218 | 100.246349 | 100.020234 |
| 99.849622  | 99.903522  | 100.011357 | 99.9173902 |
| 100.271199 | 100.393449 | 100.070283 | 100.061758 |
| 100.174555 | 100.327594 | 99.8150575 | 100.031722 |
| 100.038882 | 100.115964 | 100.054309 | 99.9227884 |
| 100.301865 | 100.359372 | 99.9501245 | 100.002516 |
| 100.442029 | 100.529217 | 99.9989332 | 100.136919 |
| 100.051582 | 99.9764093 | 100.350178 | 100.005008 |
| 100.095103 | 100.142468 | 99.8830347 | 99.8724049 |
| 100.521791 | 100.659982 | 100.07756  | 100.163218 |
| 99.9217949 | 99.8501073 | 100.495362 | 100.003762 |
| 100.02324  | 99.8872947 | 99.8131051 | 99.9446582 |
| 101.022406 | 100.455453 | 100.291299 | 100.235081 |
| 100.884983 | 100.180692 | 100.140762 | 100.116277 |
| 100.98419  | 100.524821 | 99.6935893 | 100.142092 |
| 101.193991 | 100.586602 | 100.466333 | 100.131683 |
| 100.933807 | 100.172157 | 100.48302  | 100.063537 |
| 100.971711 | 100.578337 | 99.8789201 | 100.235498 |
| 100.764094 | 100.377821 | 100.107388 | 99.8120511 |
| 101.306768 | 100.354247 | 100.758531 | 100.663385 |
| 100.251369 | 100.447731 | 99.1422124 | 100.863658 |
| 99.08912   | 99.1927439 | 99.6481442 | 99.5812444 |
| 98.5519053 | 98.5558343 | 100.336211 | 99.8176027 |
| 97.8292237 | 98.3211763 | 99.5689703 | 99.4302415 |
| 98.5478497 | 98.8434666 | 99.7610469 | 99.5312802 |
| 99.1398153 | 99.0630859 | 100.317749 | 99.651333  |
| 99.4759645 | 99.4840342 | 100.14236  | 99.8702039 |
| 100.011307 | 99.9281503 | 100.451244 | 99.8561861 |
| 99.5715837 | 99.8178665 | 100.173248 | 100.035502 |
| 99.2822303 | 99.4677762 | 99.9376792 | 99.800948  |
| 98.8743277 | 99.0729762 | 99.9277381 | 99.6839485 |
| 98.7576504 | 99.0754149 | 99.8783875 | 99.6657671 |
| 99.6637712 | 99.5704729 | 100.054132 | 99.8457769 |
| 99.3581953 | 99.3485504 | 100.204847 | 99.7411297 |
| 99.2967369 | 99.5433762 | 100.496157 | 99.9416804 |
| 99.0268817 | 99.4099246 | 100.398521 | 99.7336351 |
| 99.2000258 | 99.4863375 | 99.9643072 | 99.9416804 |
| 99.8704522 | 99.8545826 | 100.084488 | 100.133349 |
| 100.202078 | 100.050086 | 100.122832 | 100.142231 |
| 100.140931 | 99.959989  | 99.8941868 | 100.378589 |
| 99.6124519 | 99.7540536 | 99.7770236 | 100.165131 |

99.4248012 99.7249245 100.106678 100.149448  
99.6395934 100.125957 100.306743 100.046883  
100.013959 100.065666 100.060523 100.068395  
99.7581426 99.6861761 100.236445 100.018986  
99.4497589 99.6944407 100.328401 100.041192  
99.3806572 99.7291245 99.8127052 99.9069831  
99.9763665 99.9216471 99.8238889 100.023427  
100.013023 99.9007826 100.190645 100.063399  
99.8447146 99.4721117 100.086618 99.9591679  
99.948913 99.9144664 100.310471 100.206907  
99.65566 99.5952665 100.178574 100.079637  
99.5316514 99.6502729 100.03638 99.8993496  
100.06949 99.7360342 100.27834 99.8253749  
100.482228 100.093034 99.628617 100.155277  
100.720262 100.325524 99.8861984 100.283102  
100.400024 100.135441 99.8462564 100.099762  
100.538071 100.134086 100.307986 100.179288  
100.28943 99.8091955 99.4667188 100.084495  
99.8743519 99.7881955 99.9291582 99.8636808  
100.548366 100.237054 100.207332 100.095181  
100.483476 100.16335 99.8966721 100.118914  
100.716675 100.332163 100.105258 100.074779  
100.680486 100.359802 99.9248977 100.197053  
100.233587 100.20115 99.8966721 100.181647  
99.7564267 99.7503955 99.8119951 99.9797087  
99.8598452 100.030712 99.8222912 100.06673  
99.8674885 100.023666 99.8682689 99.9015703  
100.200986 100.338531 100.133839 100.062705  
100.35666 100.308995 99.8872635 100.124466  
100.554137 100.46575 99.8040067 99.9711038  
100.185855 100.082195 100.011883 99.9565309  
100.060131 100.028544 100.10295 99.748902  
100.138124 100.112679 99.7356615 99.8432787  
100.290054 100.32986 100.000699 99.8796416  
100.178524 99.9800406 99.731046 99.8453606  
100.305184 100.200337 99.9334187 99.8434175  
100.368047 100.417383 100.091056 99.9747123  
100.490495 100.676428 99.8324099 99.9826233  
100.48722 100.458163 99.8844232 100.059929  
100.097099 100.239492 100.120347 99.8924102  
100.783904 100.657189 100.044369 100.105729  
100.650069 100.85906 100.273724 100.225505  
100.448535 100.754737 100.49953 100.101427  
100.582839 100.776279 100.015433 100.437159  
100.215649 100.222286 100.036203 100.176096  
99.9482891 99.9480664 99.9602242 100.194693

99.9064849 99.9919632 99.7148917 100.059929  
99.7052634 100.064176 99.6713993 100.114473  
99.9025853 100.253312 100.035138 100.09532  
100.081969 100.278376 99.7686802 99.9974737  
100.042816 100.306828 99.7564313 99.8030298  
100.087272 100.09046 99.7459577 99.9829009  
100.253397 100.323899 99.9556087 99.9948367  
100.448691 100.403292 99.9431823 100.159996  
100.096943 100.172157 100.004604 99.9033745  
100.486752 100.28935 99.7985036 100.227031  
100.341997 100.474963 100.23325 100.076445  
100.09086 99.9242213 100.506275 99.8413357  
100.352604 100.339886 99.7463127 99.9905343  
100.254333 100.268621 99.9158442 99.8904671  
100.493303 99.9836987 100.421776 99.9877585  
100.413282 100.17026 99.6254216 100.113224  
100.16121 100.121486 100.083246 99.8833889  
100.069334 100.091273 99.8991574 99.9509793  
100.146703 100.210634 99.9619994 100.002331  
100.271335 100.399905 100.289879 99.8610438  
100.299413 100.431473 99.6571977 100.065342  
100.193499 100.204673 99.8989798 99.9550042  
100.182892 100.210092 99.895962 99.9339082  
100.134692 100.216324 99.8609906 99.7927594  
100.258389 100.342324 100.008687 100.034531  
99.5276929 99.7110308 100.542997 100.161458  
99.4942056 99.6955243 100.504207 99.991857  
99.402413 99.6058559 100.617246 99.8759607  
99.3951035 99.3848875 100.649135 100.046179  
99.2608143 99.325221 100.764553 100.214699  
99.4030929 99.643611 101.745255 100.365009  
99.6376741 100.050152 100.231723 100.244483  
99.6113262 99.6601289 100.397831 99.9798198  
99.6682716 99.9062112 100.070137 100.226736  
99.4857063 99.7833386 100.390216 99.7577495  
99.4438896 99.5949002 100.668411 99.9940175  
99.4709175 99.8008677 100.52848 100.291397  
99.4190716 99.7858668 101.128895 99.9611468  
99.3682457 99.6463078 100.591306 100.12226  
99.3684157 99.7878894 100.835232 99.8588308  
99.3548168 99.9239089 101.281914 100.190933  
99.2956615 99.9925085 100.488738 99.9768877  
99.5868482 99.570292 100.04158 100.030592  
99.5657698 99.8209251 99.9528148 99.9736469  
99.5368722 99.8333978 100.659843 99.9318255  
99.5222533 99.8686246 100.412586 100.103741

99.3944236 99.6967041 100.524435 99.6210195  
99.6036768 99.7047945 101.155073 99.7693237  
99.5431617 99.6700733 100.766695 100.091395  
99.5973873 99.858006 101.111761 100.114698  
99.8078304 100.054198 100.866407 100.150192  
99.8719153 100.111842 100.714816 100.075191  
100.400403 100.319157 100.761697 99.9781223  
100.332748 100.355901 100.514678 100.133834  
99.9480692 100.277189 100.545377 100.262693  
100.131654 100.292864 100.537523 99.6683966  
100.326969 100.284099 100.623671 99.8991091  
100.230586 100.286965 100.613676 100.046796  
99.9050626 100.006667 101.030611 99.9342946  
100.31031 100.212971 101.068687 100.095562  
100.43219 100.391297 101.009669 100.333836  
99.9883559 100.063974 100.324772 100.189853  
99.9144119 99.8371059 100.849273 99.6208652  
100.19234 99.8514326 100.800488 100.205748  
99.9179816 99.9326734 100.476125 100.169328  
100.106666 100.077963 100.18032 99.924881  
100.068589 99.8896933 100.817622 99.8506517  
100.31133 100.194431 100.800488 100.282447  
99.9679576 100.199993 100.421391 99.7912375  
99.9045527 99.8709843 100.478267 99.4329002  
100.158172 99.866602 100.31216 100.017938  
99.9696574 99.7447407 99.8609558 100.20544  
99.8941835 99.5825961 100.412348 100.001425  
99.8826244 99.4686566 100.988489 100.14834  
99.8535568 100.001273 100.587975 100.133988  
100.162252 100.019982 100.305972 99.658057  
100.051081 99.7113679 100.050623 99.8319787  
100.425561 100.225107 100.260281 100.152816  
100.507834 100.387589 100.118447 99.9577517  
100.241636 99.9210435 98.6470369 99.9637703  
99.8841543 99.7649667 99.4749577 99.5065121  
100.630054 100.176733 99.5006591 100.082599  
100.333088 100.203195 99.2088998 100.23507  
100.246395 100.056557 99.3405009 99.7018846  
100.382554 99.963518 100.336433 99.8771952  
100.423351 100.271121 99.9135486 100.450504  
100.303681 100.125157 99.5863307 99.9876903  
100.328839 100.011892 99.7374459 99.9225661  
100.495255 100.444221 99.2077099 100.201427  
100.143553 100.101897 99.5070845 100.057753  
99.8861941 99.7108623 99.9335387 99.8805903  
100.177551 100.301797 99.7902767 100.222415

99.6650419 99.9014918 100.021114 99.8648494  
100.050911 99.7469319 99.3707239 99.9034301  
100.236706 100.17134 99.9323488 100.268558  
99.7153578 99.8689617 99.6586756 100.023493  
99.9218913 99.8863223 99.9361564 99.8318244  
100.06111 100.018297 99.6867569 99.866547  
99.8474372 99.9950368 99.3293159 99.8011141  
100.118226 100.179936 99.6194095 99.623643  
100.152053 100.22005 100.004694 100.114698  
100.055331 100.034646 99.5677686 100.142167  
100.253365 100.044927 99.4880464 99.692008  
100.30742 99.8910417 99.7541043 99.9721037  
99.9322604 99.8485672 99.5318341 99.9680913  
99.962008 99.6287786 99.0568327 99.7974104  
100.092898 99.6505215 99.7588638 100.033524  
100.204919 100.006667 99.0925292 100.061611  
100.082698 99.9072225 99.1836742 99.9321341  
100.05737 99.973631 99.2614926 99.8866089  
100.407372 100.116898 99.3819088 99.83167  
100.215118 100.087739 99.2355531 100.176427  
100.202199 100.158698 98.8983402 99.5804327  
100.342268 100.06785 99.1786767 100.011456  
99.9917557 100.134427 99.1622563 100.196026  
100.032042 100.095998 98.7303287 99.9609925  
100.348387 100.012397 99.1051419 100.323959  
100.270023 100.328428 99.2146112 100.314391  
100.095787 100.319495 98.717002 99.9886162  
99.9990651 100.037848 99.1594006 99.9009609  
100.344307 100.499505 98.9185682 100.254823  
99.8834744 100.194262 98.6087226 100.054049  
99.8897638 99.9043571 99.2495938 99.8329046  
100.4412 100.396859 99.2914777 100.379207  
99.8946935 100.143697 99.1391726 99.9261155  
100.044298 100.113909 100.13379 99.6829026  
100.428772 100.316233 99.876298 100.118668  
100.340021 100.495816 99.4657994 100.114968  
100.374261 100.353969 99.7910276 99.8713335  
100.326393 100.154003 99.6312959 100.015047  
99.9952376 100.18281 99.9795832 100.248195  
99.9083603 100.166132 100.149884 99.8463533  
100.376816 100.405688 99.8457928 100.25498  
100.07002 100.671355 99.8839843 100.30417  
100.446999 100.721052 99.3257639 100.216739  
99.0101174 100.484192 101.947767 100.516347  
99.3170838 101.683821 100.36366 99.8226067  
99.3228756 100.98335 99.2695575 100.224295

99.8105808 100.757103 99.4761279 100.105407  
99.7579434 100.603464 99.4268873 99.8756511  
100.540861 100.995647 99.6802963 99.9968514  
100.18739 100.654172 100.365101 99.9761887  
99.9109155 100.455721 100.050442 99.7936173  
100.646988 100.873848 100.028343 100.156293  
100.465738 100.97341 99.562359 100.188829  
100.263535 100.594535 99.3831712 99.6841362  
100.746811 100.94494 100.19432 100.204866  
100.968604 101.184158 99.5594767 100.369858  
100.643921 100.84184 98.8314362 99.9892956  
100.281592 100.675566 99.0747569 99.9990101  
100.012954 100.461281 98.6404787 100.262536  
100.0552 100.379744 98.6813123 100.276105  
99.7405679 100.057642 100.033147 99.995001  
99.8395399 99.9009705 100.459739 100.110496  
99.8834896 100.042143 100.360537 100.028771  
99.9076789 100.00188 100.943738 100.089216  
100.085692 100.076004 100.361498 100.01258  
100.20732 100.301409 99.6728502 100.006257  
99.8882593 100.074825 99.6036731 99.990375  
99.9482217 100.060506 99.953882 99.8281579  
100.042765 100.079037 99.795111 99.9305459  
99.6962775 99.8810918 99.9817449 100.249429  
99.7570916 99.9585851 100.335797 100.178652  
99.8073442 100.010809 100.2904 100.325912  
99.8971174 99.8554854 100.438121 100.183124  
100.09932 100.081732 100.880086 100.350738  
100.230488 100.293659 99.8371457 100.15213  
100.079219 99.9181538 99.6802963 100.242027  
100.117888 99.977453 99.5532315 100.117281  
100.198973 99.9668398 99.5378588 100.209029  
100.164052 100.002554 99.4972653 100.219977  
99.9563983 99.7860783 100.029544 99.9834361  
100.061503 99.8987805 100.265899 100.219823  
100.135434 100.046355 100.69081 99.9080328  
100.079049 99.8684571 99.9860685 99.9055657  
100.107667 99.6915702 99.5498687 99.8943091  
100.063377 99.606833 100.020417 100.033551  
99.8378364 99.4499933 100.15733 100.119285  
99.9332311 99.6299125 100.374709 100.118206  
99.947881 99.558147 100.246203 100.104791  
99.8039372 99.6181201 101.335982 99.8320128  
100.043446 99.8354382 99.6007907 99.6415773  
100.025389 99.4663343 100.604338 99.7846738  
99.9914899 99.5525877 99.6778943 99.7529088



99.9546949 99.3930526 100.167898 100.013505  
100.09915 99.6142454 99.6154428 100.121752  
100.005118 99.5288343 100.440523 99.6458949  
100.124531 99.7384031 100.278149 99.8354052  
100.075812 100.180789 100.792173 99.9239153  
100.366425 100.564043 101.044622 99.9442696  
100.060651 100.24969 99.8580429 99.8878328  
100.053496 100.208754 98.5355121 99.6620857  
100.109882 99.8748587 99.9536418 100.111421  
99.9708779 99.5808896 100.029304 100.016897  
99.7932053 99.6250271 99.9349063 100.072563  
99.8857041 99.6041376 100.232272 100.021369  
99.458813 99.6157616 101.294908 99.8468159  
99.5027627 99.525465 99.821773 99.8296998  
99.6061637 99.3836186 100.879125 99.8614648  
99.8788902 99.6241848 100.288238 99.8869076  
100.002733 99.4788006 100.213296 99.8512877  
99.9284613 99.4715567 99.5248881 99.8210647  
99.8771867 99.4028235 99.4021469 99.9263825  
99.9700261 99.5438276 98.6520082 100.104328  
99.8780384 99.5340567 99.2318464 99.7717211  
99.9463478 99.5503977 100.35141 100.067783  
99.6806056 99.7323384 100.832767 99.9066451  
99.8686693 99.6472643 99.6262517 99.8529839  
99.9778621 99.6769139 100.199845 99.3754301  
100.0012 99.6828101 99.8333025 99.6842904  
99.9787139 99.6482751 99.8570821 99.9285413  
100.094039 99.5685917 100.349248 99.883361  
99.9848464 99.6610783 99.5931044 99.6787392  
99.9719 99.7451417 100.280551 100.015818  
100.315491 99.7656942 100.1458 99.8775015  
100.011932 99.5276551 99.6545951 100.007954  
99.7211483 99.4877292 99.4259265 99.9522879  
99.7218297 99.6304179 100.176546 99.9535215  
99.9691744 99.8396498 99.6913454 99.960152  
99.9139818 99.7897845 100.913954 99.9653948  
100.172399 100.027487 100.756864 99.9666284  
99.9512879 99.7904584 100.053084 100.262228  
99.8535084 99.6892117 99.7533165 100.14442  
99.9391932 99.7358762 100.817394 99.7777348  
99.8627033 99.9242594 99.8742102 99.7605924  
99.615851 99.6127886 99.7825183 99.9398045  
99.8300392 99.6871571 99.6416375 99.7876054  
99.9656293 99.6109336 99.7803692 99.9621867  
100.053074 99.6514063 99.0055249 100.230156  
99.7136733 99.6849648 99.9542018 100.164861

|            |            |            |            |
|------------|------------|------------|------------|
| 99.8291885 | 99.8033473 | 98.8142613 | 100.139392 |
| 99.6287806 | 99.7126212 | 99.7975615 | 100.097869 |
| 99.8584501 | 100.107229 | 99.1480772 | 100.083205 |
| 100.134564 | 99.9203807 | 99.2631696 | 100.148962 |
| 100.004588 | 100.05529  | 99.2827496 | 99.9118653 |
| 99.8137071 | 99.8274623 | 99.303046  | 100.225525 |
| 99.8050307 | 99.8778844 | 99.270333  | 100.168566 |
| 99.8086033 | 99.8665858 | 99.7755936 | 99.7331163 |
| 99.9149318 | 99.695083  | 99.4157507 | 99.8343765 |
| 99.7868273 | 99.7586588 | 99.3842316 | 99.9413481 |
| 100.055456 | 99.9417975 | 99.6282657 | 99.9394957 |
| 100.299926 | 100.107567 | 98.9195638 | 100.164861 |
| 100.312685 | 100.333202 | 99.0967393 | 99.9677436 |
| 100.521259 | 100.330841 | 99.8400645 | 100.147573 |
| 100.450657 | 100.330672 | 99.2980316 | 100.043534 |
| 100.381416 | 100.448211 | 99.8426911 | 99.7761828 |
| 100.578081 | 100.240789 | 100.223308 | 99.9606431 |
| 100.437898 | 100.226961 | 99.3242975 | 99.962341  |
| 100.520239 | 100.387334 | 99.3911562 | 99.690513  |
| 100.650045 | 100.09104  | 99.5229633 | 100.139701 |
| 100.143411 | 99.975862  | 98.9494114 | 99.8876307 |
| 100.110066 | 100.132862 | 99.8083066 | 99.9771596 |
| 100.234087 | 100.207736 | 99.7400153 | 99.9671262 |
| 99.762159  | 99.9478684 | 99.7899205 | 99.973918  |
| 99.932795  | 100.004699 | 99.678171  | 99.6107088 |
| 100.531297 | 100.375192 | 99.3875745 | 100.033655 |
| 100.150556 | 100.169625 | 99.4365246 | 99.9631128 |
| 100.031298 | 100.137584 | 99.7791753 | 99.8133836 |
| 100.064472 | 100.049725 | 99.5499456 | 100.131828 |
| 99.9986336 | 99.8917126 | 99.4100199 | 100.010501 |
| 100.22388  | 100.1047   | 99.4408227 | 99.8657116 |
| 100.146473 | 100.261363 | 99.3921113 | 100.023468 |
| 99.8873715 | 100.042305 | 99.1975048 | 99.912174  |
| 100.085398 | 99.9952551 | 99.9019088 | 99.9078519 |
| 100.513264 | 100.437925 | 100.248858 | 100.183385 |
| 100.06175  | 100.133368 | 99.5750176 | 99.9824078 |
| 100.233067 | 99.9910392 | 99.8348113 | 100.113305 |
| 100.15651  | 100.153773 | 99.8195293 | 100.243894 |
| 99.8150681 | 99.7227393 | 99.7834734 | 99.8189405 |
| 100.171481 | 99.9512411 | 99.7930246 | 99.8070548 |
| 100.212822 | 100.202677 | 99.6924978 | 100.26782  |
| 99.9074463 | 100.039606 | 99.6946469 | 99.9578646 |
| 99.9390897 | 99.7244257 | 100.330759 | 100.166714 |
| 100.310474 | 100.234044 | 100.052818 | 100.134607 |
| 100.249058 | 100.196944 | 100.227845 | 100.332651 |
| 100.193598 | 100.232526 | 99.6091633 | 100.139392 |

|            |            |            |            |
|------------|------------|------------|------------|
| 100.187133 | 99.9782229 | 100.110603 | 99.9055365 |
| 99.9048944 | 99.8519145 | 100.184625 | 100.196814 |
| 99.8916246 | 99.9775483 | 100.272736 | 99.9549317 |
| 100.038103 | 99.9079017 | 100.460895 | 100.089842 |
| 100.114829 | 100.105374 | 100.77919  | 100.139083 |
| 100.060219 | 100.166421 | 100.408124 | 99.5857025 |
| 100.080294 | 99.8976149 | 99.9510977 | 99.837155  |
| 99.9401104 | 99.9664184 | 99.4002299 | 99.890718  |
| 99.6216353 | 99.7792324 | 99.9233991 | 99.7778807 |
| 99.9077866 | 99.7008166 | 100.470924 | 100.167794 |
| 99.867807  | 99.713633  | 100.716152 | 99.9956828 |
| 99.79057   | 99.8778844 | 100.853929 | 99.6915935 |
| 100.220307 | 100.013299 | 100.555452 | 100.056964 |
| 99.8863507 | 99.7343752 | 100.347713 | 99.9402675 |
| 99.7196276 | 99.8428082 | 100.566914 | 99.7173716 |
| 100.085738 | 100.023755 | 100.342221 | 100.129513 |
| 99.5081615 | 99.6944085 | 100.055206 | 99.9404219 |
| 99.6548098 | 99.8340391 | 100.076458 | 99.7474718 |
| 100.165357 | 100.217686 | 100.739791 | 100.229384 |
| 99.9113592 | 100.102339 | 100.517009 | 99.7971758 |
| 99.8256159 | 99.8190305 | 100.539454 | 99.9705221 |
| 99.8382052 | 99.9996397 | 99.8063964 | 100.345926 |
| 99.7165654 | 99.8724881 | 100.174358 | 99.7485523 |
| 100.047119 | 99.9794033 | 100.162896 | 99.883463  |
| 99.889413  | 99.9239221 | 99.4537168 | 99.9527707 |
| 99.6435815 | 99.8768726 | 100.650965 | 99.6130242 |
| 100.028065 | 100.114481 | 100.754118 | 100.062366 |
| 99.8444998 | 99.8213914 | 100.708033 | 100.073635 |
| 99.633374  | 99.7473602 | 100.980244 | 99.7349686 |
| 99.9989739 | 100.033198 | 100.560944 | 100.313819 |
| 99.8072423 | 99.8213914 | 100.584584 | 100.218424 |
| 99.7989062 | 99.9048662 | 100.149525 | 99.8654029 |
| 99.9952311 | 100.002169 | 100.691558 | 100.24127  |
| 99.7402128 | 99.8905321 | 100.244798 | 100.007414 |
| 99.8133669 | 99.8131282 | 100.0447   | 100.15807  |
| 99.9739654 | 100.052929 | 100.073831 | 100.572526 |
| 99.7558644 | 99.8765354 | 100.578853 | 99.8652485 |
| 99.8701888 | 99.7819306 | 100.629952 | 100.116084 |
| 99.9572931 | 100.021225 | 100.408602 | 100.252384 |
| 100.015136 | 99.9947492 | 100.416004 | 99.7253983 |
| 99.9562723 | 100.026959 | 100.125169 | 100.219196 |
| 100.042526 | 100.094076 | 100.739075 | 100.36661  |
| 99.8536866 | 100.005879 | 100.797815 | 99.954623  |
| 99.7886986 | 99.905878  | 100.570973 | 100.075641 |
| 99.6803286 | 99.8534322 | 100.36395  | 100.127352 |
| 99.7223497 | 100.015323 | 100.797099 | 99.5128445 |

|            |            |            |            |
|------------|------------|------------|------------|
| 99.8511347 | 99.8635504 | 100.786354 | 99.994911  |
| 99.7131629 | 100.023923 | 100.54423  | 100.08552  |
| 99.7844455 | 100.098292 | 100.263423 | 99.8476515 |
| 100.225516 | 100.167959 | 100.798987 | 99.9937381 |
| 100.034431 | 100.117747 | 100.930323 | 99.8606562 |
| 99.9166835 | 99.9952498 | 100.563727 | 99.2038821 |
| 99.960924  | 99.9687959 | 100.58804  | 99.734051  |
| 99.8140798 | 100.000136 | 100.579459 | 99.6595683 |
| 99.8367104 | 99.9216169 | 100.352541 | 99.4361201 |
| 100.205948 | 100.151783 | 100.095828 | 100.043393 |
| 99.8700609 | 100.156838 | 100.273167 | 99.6959615 |
| 99.9636465 | 100.024063 | 101.002785 | 99.7790799 |
| 100.356025 | 100.7058   | 99.8920309 | 100.386353 |
| 100.256314 | 100.871432 | 98.7240711 | 99.9698358 |
| 99.9483325 | 99.8328192 | 100.050301 | 99.8410717 |
| 99.9473115 | 99.533401  | 99.2923193 | 100.248953 |
| 99.592197  | 99.3280038 | 99.9408945 | 100.068067 |
| 99.6481781 | 99.5662578 | 100.487452 | 100.03522  |
| 99.5745008 | 99.5494081 | 101.060944 | 100.223817 |
| 99.4671326 | 99.3551317 | 99.5154234 | 100.086726 |
| 99.4147247 | 99.2971689 | 100.938904 | 99.8261135 |
| 99.4802346 | 99.3205899 | 100.59519  | 99.9311295 |
| 99.4504574 | 99.2014629 | 100.026704 | 99.6762228 |
| 99.7155597 | 99.33963   | 100.150651 | 99.9946634 |
| 99.7684781 | 99.6757805 | 99.9961939 | 99.9874156 |
| 99.7400621 | 99.4553871 | 100.104886 | 99.878236  |
| 99.7504416 | 99.5861404 | 100.029326 | 100.040001 |
| 99.6941201 | 99.6402277 | 100.230501 | 99.8597309 |
| 100.089902 | 100.118084 | 100.341576 | 100.124507 |
| 100.445187 | 101.002859 | 101.169636 | 100.248182 |
| 100.529073 | 101.063686 | 99.7895365 | 100.242785 |
| 100.236576 | 100.655251 | 98.5729514 | 100.151339 |
| 99.9896802 | 100.233335 | 98.7600633 | 100.222892 |
| 100.227898 | 99.8720789 | 99.2956563 | 100.155194 |
| 100.150988 | 99.817149  | 99.5659556 | 100.255276 |
| 99.8344984 | 99.5647413 | 99.908001  | 100.097366 |
| 99.9188956 | 99.5367709 | 100.189026 | 100.062669 |
| 99.8433465 | 99.7438531 | 100.672895 | 99.9841772 |
| 99.7524835 | 99.6334879 | 99.0110555 | 100.040772 |
| 99.7904281 | 99.7160512 | 99.3809889 | 99.8410717 |
| 99.8816315 | 99.8707309 | 99.0611109 | 100.04108  |
| 99.575862  | 99.5239652 | 99.5025521 | 99.9224938 |
| 99.8664877 | 99.4457828 | 100.344913 | 100.128979 |
| 99.8498124 | 99.7795743 | 99.5874079 | 100.116951 |
| 99.7972344 | 99.7179046 | 100.741066 | 99.893811  |
| 100.106407 | 99.9797482 | 101.076914 | 99.8999794 |

|            |            |            |            |
|------------|------------|------------|------------|
| 100.127336 | 100.076971 | 99.6169644 | 100.142858 |
| 100.060975 | 99.8230464 | 100.688866 | 99.9525645 |
| 99.9030711 | 99.7175676 | 99.5020753 | 100.165218 |
| 99.7810696 | 99.6223671 | 99.8898857 | 99.8685208 |
| 100.006355 | 99.8321452 | 99.2055565 | 100.116026 |
| 99.6777852 | 99.626074  | 100.038383 | 99.9485551 |
| 99.7422741 | 99.7389667 | 99.3669257 | 100.145942 |
| 99.6522618 | 99.7256555 | 100.409747 | 100.051721 |
| 100.169705 | 100.038048 | 99.56095   | 100.022267 |
| 100.190804 | 99.7918746 | 99.3171086 | 99.9963597 |
| 99.9571805 | 99.8771338 | 98.572713  | 99.9561113 |
| 99.937953  | 99.8343357 | 99.6953846 | 100.074081 |
| 99.9595627 | 99.725487  | 99.5385443 | 100.275323 |
| 99.7238973 | 99.7211061 | 99.8095586 | 99.8836333 |
| 100.059104 | 99.9570011 | 99.8817815 | 99.8820912 |
| 100.268055 | 100.290287 | 100.660262 | 99.6533999 |
| 99.9442487 | 99.9944074 | 99.373123  | 99.6677413 |
| 99.9076653 | 99.5445217 | 100.454559 | 99.7676685 |
| 100.231641 | 100.129373 | 99.6784611 | 99.7428409 |
| 100.116616 | 99.9593601 | 100.327275 | 99.7932671 |
| 100.275712 | 100.008056 | 99.6069534 | 100.050487 |
| 100.336798 | 100.141168 | 100.879076 | 99.9849483 |
| 100.207649 | 100.320111 | 99.4632228 | 99.8770023 |
| 99.8241189 | 99.8011419 | 100.076521 | 100.008234 |
| 99.9263824 | 99.8240574 | 100.070085 | 100.152419 |
| 99.9619449 | 99.7888416 | 99.9888047 | 100.155657 |
| 99.9842353 | 99.818497  | 100.881698 | 100.34117  |
| 100.269416 | 100.02659  | 100.483877 | 100.116334 |
| 100.158645 | 99.9834551 | 99.4524966 | 100.025659 |
| 100.223984 | 100.124655 | 99.6901407 | 99.7875614 |
| 99.8831629 | 99.6922932 | 100.356116 | 100.08796  |
| 99.8840137 | 100.22828  | 101.542191 | 99.7570281 |
| 100.287282 | 100.315899 | 100.43835  | 99.5915623 |
| 100.111852 | 100.309664 | 99.5814489 | 100.03044  |
| 100.16392  | 100.364763 | 101.14723  | 99.9571907 |
| 100.352622 | 100.457773 | 99.7685609 | 99.7618085 |
| 100.308041 | 100.343701 | 99.4148359 | 100.0821   |
| 100.349219 | 100.347407 | 101.136742 | 99.8927316 |
| 100.255633 | 100.312697 | 100.192363 | 99.7392941 |
| 100.096708 | 99.8885916 | 99.1984058 | 99.9124703 |
| 99.9786201 | 99.8837052 | 101.005168 | 99.7392941 |
| 100.036813 | 100.323818 | 100.645246 | 99.8515579 |
| 99.9813426 | 100.311855 | 99.5464101 | 100.047711 |
| 99.9787903 | 100.042597 | 100.421188 | 100.013323 |
| 99.9202568 | 100.233841 | 101.115052 | 99.8600394 |
| 100.104365 | 100.316236 | 99.9256396 | 100.00222  |

|            |            |            |            |
|------------|------------|------------|------------|
| 100.064379 | 100.039227 | 99.6267372 | 100.138077 |
| 100.064038 | 100.375041 | 100.279126 | 100.084875 |
| 100.018947 | 100.242434 | 100.723666 | 100.103226 |
| 99.7905983 | 99.9699754 | 99.1795754 | 99.9439288 |
| 100.141119 | 100.107805 | 99.6972915 | 99.8924232 |
| 100.353983 | 100.597119 | 99.237735  | 100.060665 |
| 100.217348 | 100.576226 | 98.6902241 | 100.329604 |
| 100.090412 | 100.834868 | 100.082242 | 100.200223 |
| 100.454545 | 100.946749 | 100.294143 | 100.421513 |
| 100.474964 | 101.122154 | 100.57636  | 99.990654  |
| 100.320463 | 101.086602 | 100.618073 | 99.9009046 |
| 99.8317317 | 99.7657449 | 99.9199008 | 100.063688 |
| 99.9210047 | 99.7299474 | 99.9260795 | 100.101031 |
| 99.8600724 | 99.6734921 | 100.249918 | 100.01634  |
| 99.716165  | 99.5853426 | 100.40275  | 99.9199539 |
| 99.9191153 | 99.9458642 | 99.815044  | 99.8356863 |
| 99.7092373 | 99.9400631 | 99.6892887 | 99.9167128 |
| 99.4075671 | 99.5951055 | 100.365496 | 99.7873522 |
| 99.6429517 | 99.7196185 | 100.256278 | 100.107935 |
| 99.6484624 | 99.3347602 | 99.9555193 | 100.000417 |
| 99.4812527 | 99.1931267 | 100.338782 | 100.098917 |
| 99.7618249 | 99.6774539 | 100.118711 | 100.124282 |
| 99.7703271 | 99.5788339 | 100.233381 | 99.8740154 |
| 99.8714086 | 99.6923105 | 100.304618 | 99.7259129 |
| 99.8726682 | 99.8195119 | 99.8199507 | 99.8652786 |
| 99.7577312 | 99.577985  | 100.298621 | 99.6692648 |
| 99.5654873 | 99.4933727 | 100.612827 | 99.7277448 |
| 99.9510773 | 99.9805298 | 100.188676 | 100.003517 |
| 99.9046301 | 99.8302653 | 99.8808294 | 99.9430641 |
| 99.5711555 | 99.844273  | 100.224112 | 99.8697879 |
| 99.7254544 | 99.8414431 | 100.011491 | 99.9592694 |
| 99.9011663 | 99.8647893 | 99.883737  | 99.8201855 |
| 99.8136252 | 99.8090415 | 100.424013 | 99.6935023 |
| 99.9814647 | 99.9471377 | 100.287172 | 99.7694559 |
| 99.8191359 | 99.6606163 | 99.771066  | 99.9915391 |
| 99.8566085 | 99.7555575 | 100.100901 | 99.8843022 |
| 99.9628858 | 100.049295 | 100.039841 | 99.7970754 |
| 99.9620986 | 99.8664872 | 99.8112278 | 99.9577193 |
| 99.9280899 | 99.7210334 | 100.021486 | 99.7115395 |
| 99.6424794 | 99.7439551 | 100.675887 | 100.267452 |
| 99.4072522 | 99.1099294 | 100.270998 | 99.7694559 |
| 99.9318686 | 99.0990345 | 100.26064  | 100.197135 |
| 100.101597 | 99.6515608 | 100.154874 | 100.041141 |
| 100.022401 | 99.8512061 | 100.29753  | 99.7366225 |
| 100.087585 | 99.8506401 | 100.110533 | 99.6333313 |
| 100.278411 | 100.117636 | 99.293123  | 99.8535826 |

|            |            |            |            |
|------------|------------|------------|------------|
| 100.119389 | 99.9864725 | 99.5384549 | 99.8917707 |
| 100.003822 | 99.8712979 | 99.8862812 | 99.9546191 |
| 100.111989 | 100.000905 | 99.9358928 | 99.9474324 |
| 100.30691  | 100.240875 | 99.6334984 | 100.18558  |
| 100.157019 | 100.091601 | 99.7941454 | 100.122309 |
| 100.067589 | 99.6829721 | 100.047292 | 99.9864661 |
| 99.8484212 | 99.0762543 | 99.927715  | 99.6195216 |
| 99.864166  | 99.5389332 | 99.8370331 | 99.4305536 |
| 99.8997492 | 99.9775585 | 100.060558 | 99.4826924 |
| 100.125215 | 100.219085 | 99.7625248 | 99.8959982 |
| 100.229445 | 100.592907 | 99.6434934 | 100.248851 |
| 100.249126 | 100.371897 | 99.7597989 | 100.201644 |
| 100.255581 | 100.293227 | 100.04602  | 99.9496871 |
| 99.9181706 | 100.005857 | 100.061285 | 99.8906434 |
| 100.020354 | 100.045192 | 100.175955 | 99.8306133 |
| 100.173394 | 100.13801  | 100.224294 | 99.9761792 |
| 100.298722 | 100.365105 | 99.9188104 | 100.1333   |
| 100.158436 | 100.182014 | 99.861748  | 100.024654 |
| 100.348948 | 100.473912 | 99.6338618 | 100.290562 |
| 100.458847 | 100.576919 | 99.5631699 | 100.411327 |
| 100.056095 | 100.019016 | 100.078549 | 99.8919116 |
| 100.027439 | 99.5600155 | 100.073824 | 99.7624101 |
| 100.052159 | 99.9029922 | 100.023485 | 99.8263858 |
| 100.101125 | 100.194324 | 100.028937 | 99.9454596 |
| 100.122066 | 100.325912 | 100.279903 | 99.7273221 |
| 100.291952 | 99.9120477 | 100.283537 | 100.070311 |
| 100.13844  | 99.8193704 | 100.150876 | 99.8246949 |
| 99.9312388 | 99.6652856 | 99.6545788 | 99.8028529 |
| 100.04901  | 99.9379407 | 99.9402542 | 99.9654697 |
| 100.024605 | 99.9806713 | 100.251008 | 99.859501  |
| 100.245977 | 100.507871 | 100.280993 | 99.958142  |
| 100.098448 | 100.17876  | 99.9611529 | 100.07482  |
| 100.009176 | 100.16164  | 99.9195373 | 99.807644  |
| 100.208032 | 100.45184  | 100.009492 | 99.8504824 |
| 100.04775  | 100.238187 | 99.5373646 | 100.033673 |
| 100.161743 | 100.273701 | 99.5838868 | 100.094408 |
| 100.150564 | 100.340344 | 100.032208 | 100.117518 |
| 100.321395 | 100.438822 | 100.051835 | 100.248992 |
| 100.00335  | 100.239036 | 100.128887 | 99.9251678 |
| 100.042554 | 100.409109 | 100.039841 | 100.070734 |
| 100.191973 | 100.502352 | 99.6680266 | 100.447683 |
| 100.16867  | 100.416891 | 99.7332667 | 100.428378 |
| 100.212913 | 100.105609 | 99.9133586 | 100.262379 |
| 99.9598943 | 99.5148795 | 99.8695623 | 99.9182629 |
| 99.945724  | 99.7361731 | 99.7934185 | 99.9068487 |
| 99.8021315 | 99.9646827 | 99.9238988 | 99.7974981 |

|            |            |            |            |
|------------|------------|------------|------------|
| 99.959422  | 100.32761  | 99.9667864 | 100.163738 |
| 100.228343 | 100.637336 | 99.5522662 | 100.39484  |
| 100.147257 | 100.385904 | 99.4037949 | 100.320014 |
| 100.146628 | 100.411232 | 99.8913695 | 100.262379 |
| 99.9698136 | 100.195173 | 100.01131  | 100.124423 |
| 99.8337786 | 99.8072021 | 100.200851 | 100.037478 |
| 99.9099833 | 100.100657 | 100.099993 | 100.198826 |
| 100.106478 | 100.285304 | 99.7138219 | 100.54266  |
| 100.091993 | 100.308508 | 100.13761  | 100.533501 |
| 99.9515496 | 100.231395 | 100.32697  | 100.357638 |
| 100.191185 | 100.462593 | 100.113077 | 100.373702 |
| 100.18347  | 100.668889 | 99.935711  | 100.574507 |
| 100.000516 | 100.505041 | 99.6752957 | 100.45952  |
| 100.064282 | 100.616395 | 100.029301 | 100.249697 |
| 100.139542 | 100.66903  | 99.8542972 | 100.318886 |
| 99.9773711 | 100.439954 | 99.8753775 | 99.8603465 |
| 99.9520219 | 99.4994569 | 100.313704 | 99.6478456 |
| 99.9342303 | 99.3931964 | 100.548132 | 99.7053392 |
| 99.6037472 | 99.250148  | 99.8144989 | 99.9005075 |
| 99.5645427 | 99.3162247 | 99.9258978 | 99.7938343 |
| 99.9832516 | 100.191765 | 99.6275816 | 100.00419  |
| 99.9351434 | 100.206412 | 99.5553241 | 100.001375 |
| 99.8942908 | 100.23855  | 99.6705015 | 100.440134 |
| 99.7543826 | 99.9938211 | 99.6500376 | 100.232012 |
| 99.9173197 | 100.084261 | 99.8001667 | 100.048094 |
| 99.8354568 | 100.047858 | 99.6860758 | 99.7846697 |
| 99.9591186 | 100.325577 | 99.7702858 | 99.8304031 |
| 100.170637 | 100.596328 | 99.463327  | 100.238485 |
| 100.176789 | 100.455549 | 99.9602561 | 100.130132 |
| 100.036407 | 100.208118 | 99.8247958 | 100.020935 |
| 100.151078 | 100.313774 | 99.5712606 | 100.146033 |
| 99.9804124 | 100.167022 | 99.5330492 | 100.252979 |
| 100.061329 | 100.231582 | 99.9984675 | 100.286329 |
| 99.9004423 | 100.202146 | 99.7902064 | 100.092561 |
| 100.270639 | 100.686768 | 99.6741235 | 100.314473 |
| 100.168587 | 100.632305 | 99.2898365 | 100.102974 |
| 99.9767846 | 100.518971 | 99.6594546 | 99.8437713 |
| 99.9159001 | 100.462374 | 99.5502534 | 99.8692412 |
| 99.83593   | 100.509159 | 99.5154828 | 99.7866398 |
| 100.12868  | 100.662736 | 99.5212779 | 100.124363 |
| 100.252342 | 100.410613 | 99.7393183 | 100.171081 |
| 100.218272 | 100.619791 | 100.029073 | 100.150677 |
| 100.040508 | 100.627328 | 99.961886  | 100.061321 |
| 99.860063  | 100.51186  | 100.13103  | 100.038806 |
| 99.7152651 | 99.7901889 | 99.7472865 | 99.9763276 |
| 99.9570681 | 99.5851346 | 99.3325753 | 100.093686 |



|            |            |            |            |
|------------|------------|------------|------------|
| 100.213225 | 100.249926 | 100.139723 | 100.192048 |
| 100.02158  | 100.123224 | 100.406478 | 100.138998 |
| 99.9747341 | 100.17072  | 99.641345  | 99.8886603 |
| 100.332312 | 100.379187 | 99.8094026 | 100.025016 |
| 100.086881 | 99.9429131 | 99.187698  | 100.039088 |
| 99.9676361 | 99.8246016 | 99.6529352 | 99.9963096 |
| 99.6646332 | 99.6310656 | 99.9767359 | 99.779041  |
| 99.8435011 | 99.7438312 | 100.013499 | 99.9374894 |
| 99.9379825 | 100.076156 | 99.6898789 | 100.129007 |
| 99.840662  | 99.8386795 | 99.8669914 | 99.9649294 |
| 100.098869 | 100.082839 | 99.9747438 | 99.9805491 |
| 99.9521784 | 99.8091016 | 99.8132057 | 99.9577528 |
| 99.7763073 | 99.8381107 | 100.266128 | 100.068639 |
| 100.073159 | 99.9855734 | 100.020018 | 100.042887 |
| 99.9586454 | 99.7886246 | 99.3691568 | 100.095234 |
| 99.9078557 | 99.9205875 | 99.8041508 | 99.7988822 |
| 100.168744 | 100.208403 | 99.8946991 | 99.9509984 |
| 100.140668 | 100.226036 | 99.6636199 | 99.8896453 |
| 99.5226745 | 98.8795317 | 100.044647 | 99.8257594 |
| 99.3059508 | 99.2690211 | 100.750018 | 99.5194163 |
| 99.7515434 | 99.871528  | 100.781348 | 99.6946102 |
| 100.10092  | 99.9676561 | 100.51242  | 99.8864088 |
| 99.9436609 | 99.9102068 | 100.639368 | 99.6815234 |
| 99.9329351 | 99.9709267 | 100.024545 | 100.042043 |
| 100.13499  | 100.078573 | 100.236247 | 100.140827 |
| 99.9539135 | 99.8954178 | 100.241861 | 100.071453 |
| 100.003599 | 100.096064 | 99.9137143 | 100.107477 |
| 99.9144805 | 99.9126242 | 100.167974 | 99.8973848 |
| 100.115904 | 99.8595831 | 100.098795 | 99.8544658 |
| 100.314173 | 100.155362 | 100.015491 | 100.082429 |
| 99.9092753 | 99.8964132 | 100.408289 | 99.9778755 |
| 100.125999 | 99.9690781 | 100.6314   | 99.9487469 |
| 100.129942 | 99.96339   | 100.056962 | 100.289988 |
| 99.778831  | 99.5989281 | 100.22176  | 99.9799863 |
| 99.9766268 | 99.7923219 | 100.254719 | 100.001094 |
| 100.282311 | 100.143417 | 99.9830743 | 100.039088 |
| 99.9280454 | 99.7866338 | 100.174312 | 99.8641754 |
| 99.8018599 | 99.8164961 | 100.228279 | 100.014884 |
| 100.166378 | 100.070752 | 100.082859 | 100.043309 |
| 99.9892454 | 99.7219322 | 100.161273 | 99.8616424 |
| 100.356288 | 100.21793  | 100.153124 | 100.156728 |
| 99.9854598 | 100.046293 | 100.194957 | 99.8550287 |
| 100.043663 | 100.1191   | 100.579063 | 99.8315288 |
| 100.326949 | 100.467209 | 99.961886  | 100.115498 |
| 100.036092 | 99.9505919 | 100.138636 | 99.981112  |
| 99.5061126 | 99.1140217 | 100.224476 | 99.9939174 |

|            |            |            |            |
|------------|------------|------------|------------|
| 100.135463 | 99.7489505 | 100.090827 | 100.25706  |
| 99.8187372 | 99.588974  | 100.22683  | 99.7577926 |
| 99.8163712 | 99.547309  | 100.416076 | 99.8560137 |
| 100.100762 | 99.983156  | 100.03197  | 99.9480433 |
| 99.9805701 | 100.024821 | 100.429296 | 99.8278701 |
| 99.8220496 | 99.6647673 | 100.187713 | 99.8764178 |
| 99.9102217 | 99.4776304 | 99.9254856 | 100.106351 |
| 99.9769423 | 99.6431527 | 99.8595664 | 100.032193 |
| 99.9651124 | 99.7542119 | 99.9999163 | 99.9826599 |
| 99.9239444 | 99.7887668 | 99.9184228 | 100.011085 |
| 99.8775712 | 99.9291195 | 100.165257 | 99.9411481 |
| 100.04177  | 100.091798 | 100.032151 | 99.7088227 |
| 100.228051 | 100.104312 | 99.4432253 | 99.9943395 |
| 100.233099 | 100.269692 | 99.9327294 | 99.9221512 |
| 99.8674764 | 100.010459 | 100.235885 | 99.8249151 |
| 99.960065  | 99.9773258 | 100.243853 | 100.255371 |
| 99.9184238 | 99.8311428 | 99.8097648 | 100.181494 |
| 99.94303   | 99.7808036 | 99.9457684 | 99.8422234 |
| 100.131362 | 100.025248 | 100.104409 | 100.006582 |
| 100.108491 | 99.9104912 | 100.119802 | 100.177273 |
| 100.004703 | 99.7830788 | 100.358125 | 100.037118 |
| 100.263857 | 100.017995 | 100.422415 | 100.265925 |
| 100.05849  | 99.6582261 | 99.8702511 | 100.285344 |
| 99.977731  | 99.7699963 | 100.192603 | 99.9210254 |
| 100.076944 | 99.8133677 | 100.250011 | 99.7929721 |
| 99.9496547 | 99.8594409 | 99.9664134 | 100.238344 |
| 99.8542277 | 99.5011517 | 100.049858 | 100.12202  |
| 100.011556 | 99.719333  | 100.239696 | 100.044371 |
| 100.023064 | 99.8375027 | 100.337789 | 99.8683551 |
| 100.041193 | 99.8531073 | 100.322921 | 100.005898 |
| 99.9790815 | 99.7238725 | 100.164631 | 99.9603792 |
| 99.6152397 | 99.551654  | 100.596709 | 99.8348149 |
| 99.4613794 | 99.1679217 | 100.386744 | 100.12188  |
| 99.902309  | 99.4289448 | 100.355376 | 99.9751764 |
| 99.673095  | 99.4070983 | 100.452199 | 99.6852932 |
| 99.7946383 | 99.4286611 | 100.737229 | 100.070301 |
| 100.220592 | 100.056251 | 100.232988 | 100.253786 |
| 100.052701 | 100.010856 | 100.055298 | 99.8830113 |
| 100.321641 | 100.197828 | 100.417749 | 100.131181 |
| 100.074141 | 99.8126771 | 100.012507 | 100.081857 |
| 99.6273783 | 99.6387563 | 100.478128 | 99.9531921 |
| 99.8565923 | 99.8745282 | 100.568967 | 100.025064 |
| 100.075244 | 100.008019 | 100.29246  | 100.215031 |
| 100.000994 | 99.7748004 | 100.227186 | 100.00928  |
| 99.7550697 | 99.7546562 | 100.151577 | 99.9427636 |
| 99.8628981 | 99.7167795 | 100.083764 | 99.7671708 |

|            |            |            |            |
|------------|------------|------------|------------|
| 99.6191808 | 99.4000053 | 100.208329 | 99.9182426 |
| 100.000048 | 99.8062934 | 100.05421  | 100.00308  |
| 100.028424 | 100.005323 | 100.206334 | 99.7959195 |
| 99.7728835 | 99.97227   | 100.436243 | 99.69699   |
| 99.9521244 | 100.058237 | 100.510221 | 100.045357 |
| 100.09495  | 99.9898607 | 99.5749905 | 99.9496689 |
| 99.7875444 | 99.6407423 | 100.083946 | 99.7061501 |
| 100.042612 | 100.067316 | 99.8148721 | 99.746032  |
| 100.228001 | 100.216412 | 100.054572 | 99.9715123 |
| 99.8796083 | 99.8426096 | 100.264718 | 99.8852661 |
| 100.200886 | 100.367635 | 99.9390739 | 99.9529102 |
| 100.225006 | 100.426081 | 100.160099 | 100.027037 |
| 100.219961 | 100.273298 | 100.100445 | 100.069596 |
| 100.226109 | 100.283086 | 100.136346 | 99.894849  |
| 100.109453 | 100.295002 | 100.098632 | 99.9902554 |
| 100.314547 | 100.498714 | 99.9958259 | 100.178391 |
| 100.112133 | 100.217405 | 99.876701  | 99.9413543 |
| 100.237775 | 100.307628 | 100.235526 | 100.014917 |
| 100.171092 | 100.132572 | 100.044056 | 100.032251 |
| 99.8997867 | 99.9658863 | 99.8359048 | 99.9540376 |
| 100.097472 | 100.194282 | 100.072523 | 100.09003  |
| 100.017231 | 100.214142 | 100.273603 | 100.272106 |
| 100.312971 | 100.316281 | 99.862921  | 100.283521 |
| 100.133415 | 100.343944 | 99.9550297 | 99.9887052 |
| 100.051125 | 100.101505 | 99.8600199 | 100.096372 |
| 99.9972105 | 99.9498561 | 99.8174105 | 100.141609 |
| 99.9981564 | 99.863605  | 99.9441507 | 100.386255 |
| 100.118596 | 100.145056 | 99.794746  | 100.531408 |
| 100.048129 | 100.141226 | 99.558672  | 100.215172 |
| 99.8685732 | 99.8373608 | 99.8170479 | 99.7852092 |
| 99.9923236 | 100.161086 | 99.9621011 | 100.065791 |
| 100.03536  | 100.093844 | 100.148313 | 100.1006   |
| 99.895688  | 99.8834654 | 99.7115218 | 100.331576 |
| 100.160529 | 100.033979 | 99.7831417 | 100.135127 |
| 99.8805542 | 100.053982 | 100.576764 | 99.9141558 |
| 99.9943729 | 100.042207 | 100.366074 | 100.026473 |
| 99.9740369 | 99.7911143 | 99.8444267 | 100.039297 |
| 100.130262 | 99.9013398 | 99.4206902 | 100.273515 |
| 100.146342 | 100.311316 | 99.82285   | 100.158238 |
| 99.8966338 | 100.092851 | 99.8712615 | 100.043807 |
| 100.053332 | 100.137537 | 99.9466892 | 100.061    |
| 100.077766 | 100.176265 | 99.6420776 | 100.355956 |
| 99.9306849 | 100.131721 | 99.8569375 | 100.167117 |
| 99.5955343 | 99.7460027 | 99.8986403 | 99.7374355 |
| 99.8293199 | 100.027737 | 100.04732  | 99.6898028 |
| 99.7716223 | 99.932691  | 99.9006348 | 99.8906213 |

99.8830765 99.8552352 99.1523419 100.222641  
99.9956341 99.9863142 99.7211315 100.090312  
99.843035 99.9424794 99.9546671 99.9693985  
99.964263 100.102782 100.106429 99.923175  
100.037883 100.222654 99.9780569 99.8940035  
99.9133441 100.264219 99.8172292 99.9196519  
99.9332072 99.9185049 99.6600279 99.9667209  
100.116389 100.367635 99.9831338 100.008998  
99.8815 100.045612 100.102984 99.7812633  
99.8143438 100.26507 100.012688 99.8490483  
99.7114024 100.119805 99.9427002 99.7833772  
99.984599 100.386502 99.8643715 100.017031  
100.077294 100.314437 100.120209 99.6871252  
99.9190192 100.136828 100.468337 99.7033316  
99.7966877 99.437882 100.416117 99.9940604  
99.5912779 99.1090496 100.495534 99.6487936  
100.126636 99.994684 100.089023 99.7816861  
100.247706 100.005749 99.3572295 100.157675  
100.217439 100.219249 99.7791528 100.185719  
99.8963185 99.9261654 99.8873987 100.04578  
99.9584302 99.7861492 99.8814152 100.08383  
100.040405 99.7465702 99.5222274 100.119202  
100.118123 100.013835 99.7037251 100.139072  
99.77178 99.6674121 100.184395 99.9078141  
99.7873867 99.4821424 99.9782382 99.7144647  
99.9401435 99.6601772 99.8478717 99.908096  
100.10898 99.9494305 99.6127043 99.992933  
100.144135 100.370898 100.201983 99.9781358  
100.106615 99.9900026 100.153209 99.8094483  
100.02401 99.6674121 99.8065316 99.8155081  
100.172668 99.9958189 99.4529645 100.015058  
100.313917 100.265637 99.7347303 99.9622113  
100.264417 100.39856 100.025924 99.9996974  
100.232415 100.302805 99.398207 100.28338  
100.25748 100.41374 99.748329 99.9716533  
99.8712613 99.9134337 100.21446 99.8096801  
100.112798 99.7740404 99.8646323 100.151691  
99.9328667 99.4945454 99.6924432 100.039565  
100.16306 99.9614565 100.157427 99.9308207  
99.8427433 99.5888909 100.433874 99.7338969  
99.937751 99.5480929 99.706429 100.000265  
100.06301 99.7264427 99.9343798 99.6696642  
100.076245 99.8441621 99.9449146 99.6259972  
100.031656 100.202987 100.293471 99.7971435  
100.157072 99.8081804 100.343238 99.9209604  
99.8449491 99.4698966 100.265317 100.020127

99.7924821 99.6040485 100.201927 99.9036345  
99.7680605 99.5990904 99.836479 100.159297  
99.8099711 99.601357 99.7970644 99.9892781  
99.7688483 99.6893278 100.13672 99.96505  
99.6483161 99.3694597 99.9846925 100.152677  
99.8036688 99.6461215 100.005217 100.278325  
99.7680605 99.6999523 100.04445 99.9167346  
99.8287206 99.6118398 100.157427 100.144648  
99.9963627 99.8122886 99.7207781 100.387633  
99.877091 99.8145551 100.179404 100.035903  
99.9921087 99.8349542 100.316175 99.9246228  
100.006289 99.8203632 99.840475 100.227615  
99.8416403 99.8410455 99.7472967 100.149719  
99.8295083 99.9080507 100.090767 100.130139  
99.8726794 99.8268795 100.260413 100.194654  
100.203867 100.105666 99.7333108 100.506098  
98.7617347 98.6203622 100.578636 99.2728584  
99.0508545 99.1714192 100.436053 99.6886804  
99.6795127 99.4527558 99.9719781 99.7708025  
99.633033 99.468055 100.277305 99.6927654  
99.8573962 99.9457322 100.273128 99.880815  
99.9922662 99.9713726 99.7712724 100.194372  
100.23853 100.326231 100.114743 100.183244  
99.9259341 100.071101 100.448223 99.9068743  
99.9462592 99.9113088 100.543036 99.7948897  
100.284222 100.359521 99.724774 100.047595  
100.027087 100.067276 100.013209 99.9127905  
99.8532997 99.8464286 99.9781537 99.8329222  
100.108072 100.251718 99.8484669 100.305089  
99.9221527 99.9271748 100.225903 99.8830688  
99.9328667 100.051269 100.208829 99.8888441  
100.281859 100.384595 100.207194 100.261703  
100.019681 100.110058 100.157245 100.049426  
99.9612272 100.049286 100.413349 99.9067335  
100.091686 100.278775 99.8924223 100.119715  
100.126664 100.183296 99.644855 100.137041  
99.9440533 100.237835 100.087497 99.9146217  
99.8640136 99.999138 100.419161 99.9108184  
100.115792 100.143773 99.7035228 100.136478  
100.116422 100.084559 99.7707275 99.9065926  
100.031341 100.215453 100.00885 99.8743354  
99.9804493 100.157655 100.099304 99.9018033  
100.183227 100.224094 99.9935926 100.091121  
100.139583 100.182729 100.11892 100.03703  
100.117683 100.077759 99.8453791 100.014492  
100.179131 100.36972 99.7783561 100.198034

|            |            |            |            |
|------------|------------|------------|------------|
| 100.022045 | 100.320281 | 99.9156715 | 99.9156077 |
| 99.9607545 | 100.191654 | 100.179404 | 99.7658723 |
| 100.02236  | 100.292799 | 100.087679 | 99.9643457 |
| 99.9442109 | 100.210636 | 99.7258638 | 99.9005356 |
| 99.8772486 | 99.9821388 | 100.072603 | 99.6886804 |
| 100.198983 | 100.237977 | 100.152704 | 100.008435 |
| 100.169047 | 100.165022 | 99.6706471 | 100.212402 |
| 100.14305  | 100.269567 | 99.9995865 | 100.011957 |
| 100.101297 | 100.121107 | 99.8061461 | 99.8589815 |
| 100.323612 | 100.392528 | 99.7522008 | 100.171693 |
| 100.103345 | 100.310931 | 99.8491934 | 100.063934 |
| 100.184488 | 100.408677 | 100.138718 | 99.9575843 |
| 100.167786 | 100.242226 | 100.070424 | 100.033368 |
| 100.123512 | 100.259934 | 99.758558  | 100.262689 |
| 99.929558  | 100.108216 | 100.033552 | 100.118025 |
| 99.8700009 | 100.035828 | 100.200111 | 99.9992792 |
| 99.9766679 | 99.9113088 | 99.9078612 | 99.9465972 |
| 100.000932 | 99.7893397 | 99.678639  | 99.8627848 |
| 100.067737 | 99.9376576 | 99.9085878 | 99.8771526 |
| 99.990218  | 99.8970012 | 99.9536331 | 99.9816716 |
| 100.014797 | 100.062602 | 99.7547437 | 100.101967 |
| 99.9878546 | 99.8557782 | 99.8388403 | 99.8317953 |
| 100.000774 | 100.021662 | 99.9563576 | 99.8578546 |
| 100.13722  | 100.214319 | 99.8368423 | 100.107742 |
| 99.9292428 | 99.8869433 | 99.9618066 | 100.015478 |
| 100.152503 | 100.269142 | 100.110383 | 100.035199 |
| 100.263109 | 100.34323  | 99.6608388 | 100.323401 |
| 100.296669 | 100.193212 | 99.6572061 | 100.259027 |
| 100.116265 | 100.192079 | 100.069334 | 99.9757554 |
| 100.250977 | 100.34238  | 100.079687 | 100.220431 |
| 100.175034 | 100.385586 | 99.8666303 | 100.196485 |
| 99.9730441 | 100.02917  | 99.8575486 | 99.9963211 |
| 100.052926 | 99.9638647 | 99.6152486 | 100.088585 |
| 100.164793 | 100.054102 | 99.6172466 | 100.191695 |
| 100.005974 | 100.034978 | 100.057891 | 99.7710842 |
| 100.016845 | 99.8339625 | 100.053895 | 99.9261723 |
| 100.096412 | 99.7547747 | 99.6315957 | 100.021254 |
| 100.054817 | 99.8751856 | 100.068244 | 99.6800879 |
| 100.140371 | 100.100283 | 100.187215 | 99.7874241 |
| 100.126348 | 100.003529 | 99.9065898 | 100.19733  |
| 100.155339 | 100.072659 | 99.9696169 | 100.065907 |
| 100.237112 | 100.250726 | 99.9247532 | 100.023648 |
| 100.128082 | 100.197887 | 100.067699 | 99.9082829 |
| 99.9003231 | 99.6805692 | 99.9830126 | 100.241129 |
| 99.8901508 | 99.8311746 | 100.019757 | 100.117347 |
| 99.8516108 | 99.8978336 | 100.006985 | 99.9129626 |

|            |            |            |            |
|------------|------------|------------|------------|
| 99.8695198 | 99.9473517 | 99.9162038 | 99.780999  |
| 100.003908 | 99.8292701 | 100.059253 | 99.7367587 |
| 100.290308 | 99.8367417 | 100.216647 | 99.9220531 |
| 100.436875 | 99.9281598 | 99.8653113 | 100.194768 |
| 100.267671 | 99.7875166 | 99.9731878 | 100.327943 |
| 100.085143 | 99.9505748 | 99.9612015 | 100.414303 |
| 99.8656514 | 99.9486703 | 99.7558629 | 100.477331 |
| 100.091734 | 99.9828056 | 99.748003  | 100.445665 |
| 100.027691 | 100.182636 | 99.8360334 | 100.358245 |
| 100.195606 | 100.010348 | 99.8466442 | 100.168557 |
| 100.097321 | 99.9467657 | 99.69377   | 99.8109976 |
| 99.8282576 | 99.8541756 | 99.6493619 | 99.827512  |
| 100.113798 | 99.7284758 | 99.8230646 | 99.8137248 |
| 100.111792 | 99.7968928 | 99.5825531 | 99.8594803 |
| 100.195033 | 99.8412833 | 99.6299087 | 99.9593241 |
| 100.055056 | 99.8370347 | 100.092265 | 99.8185731 |
| 100.27899  | 99.8310281 | 99.8943928 | 99.8672072 |
| 100.232713 | 99.7273038 | 99.9140424 | 100.031897 |
| 99.8232431 | 99.8946105 | 100.059646 | 100.04432  |
| 100.068667 | 99.8201869 | 100.026045 | 100.048714 |
| 100.18486  | 100.152163 | 100.065345 | 100.098712 |
| 99.9460267 | 100.100448 | 100.24337  | 100.248402 |
| 99.8761102 | 99.982659  | 99.9399799 | 100.271279 |
| 99.8980308 | 100.13429  | 99.8706167 | 100.124771 |
| 99.5746671 | 100.069096 | 99.5334291 | 100.275825 |
| 99.680688  | 99.8820113 | 100.041175 | 100.294309 |
| 99.4558951 | 100.069536 | 100.664265 | 99.9714448 |
| 99.8766833 | 100.431838 | 100.279722 | 99.8203912 |
| 100.212798 | 100.404735 | 100.048642 | 99.947355  |
| 100.29432  | 100.177215 | 100.134315 | 99.7956953 |
| 100.049325 | 100.29603  | 100.213699 | 99.5355558 |
| 99.7960215 | 99.8408438 | 100.183439 | 99.6096433 |
| 100.113081 | 99.937243  | 100.134118 | 99.6275213 |
| 99.812641  | 99.9496958 | 100.20525  | 99.8166034 |
| 99.6285372 | 99.8070016 | 100.502745 | 99.8244819 |
| 100.185863 | 99.6792507 | 100.52829  | 99.5619182 |
| 99.8205209 | 99.8005554 | 100.683129 | 99.5670695 |
| 100.036718 | 99.935778  | 100.644616 | 99.6240366 |
| 99.8907239 | 99.9896912 | 100.346727 | 99.7964529 |
| 99.8667976 | 99.9830986 | 100.290726 | 99.9049327 |
| 100.221108 | 100.175897 | 100.150427 | 99.8566016 |
| 100.187582 | 100.201975 | 99.879459  | 99.8403902 |
| 100.102336 | 100.218676 | 99.7397502 | 99.8688738 |
| 99.9258254 | 100.139857 | 99.7454486 | 99.8643285 |
| 100.155346 | 99.8672144 | 99.7572383 | 99.9325072 |
| 99.9798388 | 99.9212742 | 99.9120774 | 99.883267  |

99.8375702 99.9640531 99.9307446 99.8578137  
100.167954 100.034961 99.8928208 99.8108461  
100.210649 100.5675 99.827584 99.8458445  
100.020528 100.356975 99.9350675 99.8243304  
100.156779 100.104843 99.9800651 99.6531261  
100.14016 100.159196 100.005413 99.595553  
99.9827042 100.104843 99.9566821 99.798271  
100.260221 100.190987 99.8804415 99.8314512  
100.062363 100.280647 99.933692 99.8887213  
100.038867 99.9879332 100.140013 99.984323  
99.8070534 100.080816 100.038621 99.965839  
100.004052 100.102792 99.8890874 99.9773536  
100.073538 100.303794 100.200141 99.9552334  
100.098181 100.296176 100.251623 99.9979587  
100.343032 100.173699 99.9997148 99.9505367  
100.214088 100.081549 100.032137 99.8144823  
99.8646485 100.052688 100.050804 99.8519049  
100.021817 100.061185 100.399781 99.9408401  
100.091017 100.255302 100.241798 100.067046  
100.297472 99.826926 99.8228681 100.047653  
99.9331323 100.009762 99.7002544 99.9206896  
100.082994 100.17326 99.7375887 99.8232698  
100.074828 100.063382 99.5196743 99.9120536  
100.044597 100.101034 99.7163671 99.9522032  
100.057922 100.048879 100.152589 99.9234167  
100.129701 99.958779 99.9297621 99.8256939  
100.083711 100.018699 99.9238672 99.8403902  
100.206064 99.9316759 99.3614948 100.61187  
99.6935824 99.8937315 99.5194778 100.488694  
99.8390029 99.6436504 99.5314641 100.309762  
99.8877152 99.9845636 99.8112748 100.222494  
99.9481758 100.043165 100.164379 100.251129  
99.8719554 99.9643461 99.9366395 100.154164  
99.8155064 99.8585707 99.750754 100.072349  
99.7273945 99.7857586 99.775316 100.124317  
99.7488852 99.4199398 99.8458582 100.245978  
99.8963115 99.869998 100.05159 100.190223  
99.9099223 99.8390858 100.40548 100.148255  
100.111362 99.5501812 100.349871 100.159012  
99.6818341 99.8176963 100.358713 100.062501  
100.213658 99.9202486 100.134511 99.9979587  
99.9941659 99.9832451 100.199551 100.056289  
99.8246758 100.141322 99.9165968 100.313247  
99.9295505 100.136634 99.5756758 99.9702327  
99.7922964 100.029247 100.147873 100.13871  
99.7829838 100.042432 100.32806 100.166436



100.022104 99.9505748 100.311751 100.214918  
99.802612 99.8203334 100.208787 100.266886  
99.8690899 100.05049 100.188941 100.260219  
99.7839867 99.7459097 99.9474467 100.286582  
100.050042 99.9549699 100.109556 100.219767  
99.885871 99.9738211 100.128502 100.165738  
99.8751246 99.895804 99.8223504 100.128338  
99.8951845 100.061938 99.7154621 100.181486  
100.005657 99.9628431 99.5928837 100.085637  
99.9149579 100.018319 99.7099706 99.9903938  
99.714072 99.8352053 99.6697649 100.138483  
100.031592 99.9060501 99.9818004 100.10305  
99.9079369 100.014367 100.186163 100.094722  
99.7702398 99.6459441 100.244805 100.222067  
99.9030652 99.6948329 100.089669 100.245688  
99.9785765 99.8767754 100.269124 100.120312  
100.085897 99.7203019 100.206756 100.074432  
99.8596498 99.8537947 100.139681 100.109259  
100.03675 99.8862897 99.8637329 99.9743432  
100.268586 100.148299 100.042992 99.90257  
100.022995 99.8496962 99.8562801 99.9828228  
100.067987 100.067647 99.5475787 99.9796429  
99.8583602 100.107607 99.7099706 100.135606  
100.327046 100.539995 99.7203652 100.568062  
100.285207 100.382204 99.834118 99.7479699  
100.364157 100.273741 100.328942 99.6474268  
100.189063 100.211386 100.078294 99.9735861  
99.8446048 100.084919 100.216759 99.9648037  
99.8269807 100.010268 100.225388 99.9499645  
99.6397069 100.108924 100.240686 100.072615  
99.8033387 99.9016589 100.032989 100.201474  
99.847184 99.97104 99.9776818 100.123946  
99.9557942 99.9561099 100.010042 99.9616239  
99.8984801 100.088724 99.8517692 99.8444246  
99.6461548 99.9244932 99.9698368 99.9343683  
99.9691197 99.8744334 100.395233 99.8945447  
99.9986365 99.8173477 100.465838 99.9649552  
99.6518862 99.4874213 99.7195807 100.129852  
100.180752 99.8249591 99.8551034 99.6793765  
100.008666 100.218265 99.9053115 99.5685368  
99.9573703 100.299649 99.8235272 99.6819506  
99.6806865 100.006023 100.044364 99.7738627  
99.7882937 99.9682589 100.01926 99.7190486  
99.7146451 99.9995829 100.011808 99.8887907  
99.9224087 100.058572 100.072018 100.08064  
99.8745514 99.8763363 100.089081 100.215556

99.9504926 99.866822 100.275596 100.158925  
100.221732 99.7403551 100.381112 100.102142  
99.8338584 99.7510404 99.9219821 99.9470876  
99.7668009 99.6850258 99.9066844 99.8330681  
99.8135119 99.8407675 99.8676554 99.6466697  
99.9530718 99.7525041 100.060054 99.8191374  
100.278902 99.9427899 100.154391 99.7873391  
100.038756 100.033542 99.843532 99.8984816  
100.154817 99.6804883 99.9955292 100.022495  
100.142208 99.5846135 99.9982749 100.052022  
99.9851677 99.7396232 99.860791 100.039757  
99.911519 99.648286 99.6401499 100.048085  
99.8966174 99.7608474 99.5377724 100.053082  
99.9694063 99.6951256 100.079471 100.160287  
99.914528 100.104679 99.9088417 100.31307  
100.034458 100.108046 99.8953091 100.167404  
99.8595065 100.022564 99.8805997 100.190571  
99.8716857 99.7229366 99.7248761 100.168464  
100.007234 99.8037349 99.8290187 99.9542043  
99.8573572 99.9597693 99.8207814 99.9210433  
99.8334286 99.8384255 99.7899897 100.10305  
100.060536 100.088432 99.863929 100.126672  
99.9398895 100.207287 99.6170071 100.17225  
100.097933 100.223535 99.696634 100.2469  
99.9440448 100.063548 100.020437 100.07852  
99.8317092 100.001779 99.8915827 100.1297  
99.7238154 99.909124 99.845101 100.120918  
100.310139 100.642163 99.9239434 100.031732  
100.452564 100.6104 99.9476746 100.017498  
100.442391 100.625038 99.8166628 99.8980274  
100.136047 100.189722 99.7833215 99.842759  
99.7046151 100.0877 99.8523576 99.9084754  
99.7258214 99.8638945 100.054367 100.182092  
100.057097 99.8548193 100.390722 100.306257  
100.124728 99.9231758 100.240882 100.179669  
99.9391731 100.033688 100.324235 99.9708605  
100.111832 100.116243 100.437596 99.6896731  
99.8686768 100.023003 100.356596 99.7832508  
100.004225 100.085651 100.40092 99.7882477  
100.143498 100.074965 100.367775 99.9952392  
100.280335 99.9929961 100.188713 100.032489  
100.225027 100.085504 99.9814082 99.8120207  
100.080596 100.444998 100.180672 99.870166  
99.9546479 100.31414 100.123207 100.000085  
100.277756 100.133515 100.237352 100.04218  
100.385937 99.9001952 100.142231 100.16589

|            |            |            |            |
|------------|------------|------------|------------|
| 100.010959 | 99.6823911 | 99.9384567 | 100.206319 |
| 99.7666577 | 99.9603548 | 99.7848905 | 100.086697 |
| 99.8269807 | 99.8574541 | 100.084962 | 99.9327026 |
| 99.9706959 | 100.236562 | 99.9961176 | 99.8668348 |
| 99.97829   | 100.527992 | 100.089669 | 100.003719 |
| 100.200525 | 100.262909 | 99.902958  | 100.035366 |
| 100.310855 | 100.177134 | 99.741939  | 99.7405503 |
| 99.9870304 | 100.040421 | 99.7774377 | 99.7859764 |
| 100.118136 | 99.9827499 | 100.046914 | 99.859718  |
| 100.160835 | 100.045983 | 100.069468 | 100.089725 |
| 100.138483 | 100.027248 | 99.7782222 | 100.079277 |
| 100.24609  | 99.765385  | 99.7046752 | 100.003264 |
| 99.9373133 | 99.9065621 | 99.7705896 | 100.18822  |
| 99.7638726 | 99.7885913 | 100.101046 | 100.15243  |
| 100.140949 | 99.8289883 | 100.365922 | 100.011394 |
| 100.11519  | 99.9052448 | 100.14012  | 99.9906171 |
| 99.7763225 | 99.6416402 | 100.049014 | 100.072358 |
| 99.9669355 | 99.8851927 | 100.054904 | 100.114366 |
| 99.8550062 | 99.9339453 | 99.9883991 | 100.05246  |
| 100.050633 | 100.063779 | 99.8509578 | 99.9648085 |
| 100.049058 | 100.172535 | 100.173749 | 99.7939031 |
| 100.136496 | 99.8244577 | 99.9772075 | 100.06171  |
| 100.15968  | 100.016647 | 99.8605786 | 100.249145 |
| 100.086266 | 100.011816 | 99.8299489 | 100.28645  |
| 100.162542 | 100.13316  | 99.957573  | 100.167711 |
| 100.073673 | 100.228742 | 99.9856503 | 100.138292 |
| 100.120468 | 100.080758 | 100.067722 | 100.322997 |
| 100.293055 | 100.443326 | 100.252483 | 100.193946 |
| 100.164402 | 100.122182 | 100.218123 | 100.159674 |
| 100.308367 | 100.518855 | 99.8827656 | 99.9416066 |
| 100.10072  | 100.333692 | 99.8164011 | 99.9655667 |
| 100.199606 | 100.220838 | 100.125644 | 99.8647219 |
| 100.105442 | 100.542129 | 100.143512 | 99.7332445 |
| 100.244971 | 100.314078 | 100.24836  | 99.8343926 |
| 100.376486 | 100.308223 | 100.294501 | 99.58084   |
| 99.9849467 | 100.33457  | 100.298624 | 99.6926033 |
| 100.025732 | 100.347744 | 100.265638 | 99.9344792 |
| 100.068664 | 100.316127 | 100.366167 | 99.8484957 |
| 99.9311387 | 100.309101 | 100.219301 | 100.070203 |
| 99.9458787 | 100.376433 | 100.399349 | 99.9625338 |
| 100.131917 | 100.424737 | 100.393655 | 99.881403  |
| 99.983945  | 100.349793 | 100.343391 | 100.091282 |
| 100.065372 | 100.131257 | 100.151169 | 99.9616239 |
| 100.124332 | 100.087638 | 100.273099 | 99.7867757 |
| 99.8760428 | 99.9417032 | 100.168055 | 100.149665 |
| 100.305219 | 99.9343845 | 100.215177 | 100.13071  |

|            |            |            |            |
|------------|------------|------------|------------|
| 100.373337 | 99.8683699 | 100.441563 | 100.154821 |
| 100.12147  | 100.395608 | 100.532078 | 99.9021785 |
| 100.126765 | 100.345256 | 100.377751 | 99.9884653 |
| 100.234381 | 100.641956 | 100.144297 | 99.9328111 |
| 99.8382628 | 100.234597 | 99.8105107 | 100.240805 |
| 100.000975 | 100.006693 | 99.6685534 | 100.108114 |
| 99.9604755 | 100.092175 | 99.5454452 | 100.20441  |
| 99.85472   | 100.14326  | 99.7845932 | 100.278868 |
| 99.9723534 | 100.241916 | 99.7323655 | 100.192126 |
| 100.117034 | 100.112814 | 99.9141808 | 100.05064  |
| 99.78746   | 100.083539 | 100.04907  | 99.9265936 |
| 99.7203431 | 100.005522 | 100.042787 | 99.8870139 |
| 99.9733551 | 99.8489022 | 100.143119 | 99.821351  |
| 99.7243501 | 99.8150898 | 100.139781 | 100.005146 |
| 100.031886 | 99.9706852 | 100.276633 | 100.082638 |
| 99.9410131 | 100.048263 | 100.278793 | 100.140112 |
| 100.072098 | 99.9547304 | 100.159023 | 100.098257 |
| 99.8983674 | 100.072122 | 99.9061306 | 100.036234 |
| 99.8462767 | 99.7660546 | 99.9591437 | 100.000445 |
| 100.127481 | 100.093932 | 99.8696105 | 100.030623 |
| 99.9676309 | 99.9355555 | 99.9911479 | 100.218513 |
| 100.179285 | 100.022209 | 99.8226841 | 99.9772435 |
| 99.7694286 | 99.8585628 | 99.8821766 | 99.9949861 |
| 100.010992 | 99.8955954 | 99.6514714 | 99.9422132 |
| 99.7687131 | 100.037432 | 99.8947426 | 99.9453977 |
| 100.078538 | 100.107691 | 99.9546278 | 99.7949646 |
| 99.9912434 | 99.8917897 | 99.4148759 | 100.142386 |
| 99.9531771 | 100.168875 | 99.0698981 | 100.058981 |
| 100.010563 | 100.144577 | 99.6526495 | 99.8177115 |
| 99.966486  | 100.211031 | 99.9383312 | 99.898994  |
| 99.9785069 | 100.05968  | 100.077736 | 99.9629887 |
| 99.8309643 | 100.060851 | 100.070668 | 100.184999 |
| 99.8487095 | 100.065828 | 100.020796 | 99.8901985 |
| 99.8771877 | 100.078563 | 100.11406  | 99.7609958 |
| 99.880336  | 100.132867 | 100.140959 | 99.8952028 |
| 100.057072 | 99.8197738 | 100.092266 | 99.9849774 |
| 99.7761546 | 99.7521491 | 100.207127 | 100.127373 |
| 100.01872  | 99.8872521 | 100.248752 | 100.143903 |
| 99.9305663 | 99.9730272 | 99.9314591 | 100.406706 |
| 99.835973  | 99.880958  | 99.8199353 | 100.208504 |
| 99.7761546 | 99.4923355 | 99.9300847 | 100.148149 |
| 100.001118 | 99.5258551 | 100.007052 | 99.9021785 |
| 99.7798754 | 99.7364871 | 100.050051 | 99.8674515 |
| 99.8384059 | 99.6094346 | 100.127215 | 99.9998388 |
| 99.934144  | 99.8199201 | 100.033362 | 100.073387 |
| 99.9420148 | 99.8705655 | 99.7313838 | 99.9464593 |

|            |            |            |            |
|------------|------------|------------|------------|
| 100.081114 | 99.7982568 | 99.791858  | 99.7857142 |
| 99.9627652 | 99.8342648 | 99.5187423 | 99.8104325 |
| 99.7943291 | 99.5933335 | 99.5364134 | 100.000597 |
| 99.8813378 | 99.5943581 | 100.00823  | 99.8158918 |
| 100.147802 | 99.6984299 | 100.258766 | 99.6989724 |
| 99.7604129 | 99.7631271 | 99.9194821 | 99.7978459 |
| 100.105013 | 99.8727611 | 99.7710454 | 99.5514206 |
| 100.00813  | 99.7338523 | 99.8535102 | 99.8348476 |
| 100.011135 | 99.732535  | 99.7669222 | 100.08006  |
| 99.8342558 | 99.8205056 | 99.6624667 | 100.022282 |
| 99.9008002 | 99.5293681 | 99.9236053 | 100.282053 |
| 100.064228 | 99.684378  | 100.081074 | 100.015458 |
| 100.032887 | 99.7001864 | 100.108169 | 99.9261387 |
| 99.9513167 | 99.4816502 | 99.8564554 | 99.8797349 |
| 100.133634 | 99.8361676 | 99.9161442 | 99.9023302 |
| 99.9629083 | 99.8162608 | 99.9935041 | 99.9886169 |
| 100.096999 | 99.7802528 | 99.9344043 | 99.8025469 |
| 99.9133936 | 99.8382169 | 99.6220197 | 100.103565 |
| 99.9275611 | 99.8079175 | 99.8270037 | 100.120398 |
| 99.6832786 | 99.6720826 | 99.9789746 | 100.191975 |
| 100.092276 | 99.8090885 | 100.253072 | 100.19152  |
| 100.174732 | 99.8055682 | 100.345965 | 99.9575392 |
| 100.350585 | 99.7444807 | 100.182744 | 99.776756  |
| 100.153378 | 100.386559 | 99.8953878 | 99.7831152 |
| 100.0231   | 100.392272 | 99.8839957 | 99.7908371 |
| 100.093757 | 99.8432168 | 100.13639  | 100.000994 |
| 100.063516 | 100.061931 | 100.221045 | 100.044751 |
| 99.9325224 | 100.075701 | 100.072947 | 100.135294 |
| 100.145065 | 100.134738 | 100.063323 | 99.7228541 |
| 100.245102 | 100.186157 | 100.048788 | 99.6801566 |
| 100.201533 | 100.466397 | 100.145425 | 99.8218761 |
| 99.9137476 | 100.267021 | 99.5500892 | 100.068523 |
| 100.16513  | 100.278008 | 99.7600575 | 99.8512496 |
| 99.9490042 | 100.276982 | 99.9808286 | 100.050808 |
| 99.9712187 | 100.359604 | 100.118909 | 100.080938 |
| 100.13274  | 100.436073 | 100.203367 | 99.9811592 |
| 100.05893  | 99.6543876 | 100.252078 | 100.05853  |
| 100.040299 | 99.6914502 | 99.9154222 | 99.9080282 |
| 99.9167573 | 99.6798773 | 99.8674968 | 100.028096 |
| 100.100923 | 99.8136253 | 100.051538 | 99.8495841 |
| 100.049471 | 100.030142 | 100.075697 | 100.101984 |
| 100.103789 | 100.161106 | 100.143264 | 100.128178 |
| 100.09605  | 100.265263 | 100.138943 | 100.010987 |
| 100.008482 | 100.135324 | 100.15996  | 100.029459 |
| 100.413789 | 100.098261 | 100.18019  | 99.8760808 |
| 99.9868405 | 99.8794006 | 100.055859 | 100.05323  |

99.9313759 99.6047265 99.9221003 100.168604  
99.9226334 99.9457618 100.00597 100.172087  
99.971792 99.676801 100.117337 100.320317  
100.16771 99.9592391 99.9503842 100.27232  
99.961043 99.8401405 99.9468487 100.186319  
100.195657 99.8471721 99.7783241 100.203126  
100.042019 99.9038649 99.6987758 100.171027  
99.8756246 99.6918897 99.6158885 100.093808  
100.000169 99.8522994 99.756522 100.198584  
99.7930726 99.8823304 100.034254 100.206911  
99.8751946 99.6908643 99.8539441 100.244461  
99.9643394 99.9571882 99.832142 99.991455  
99.7632621 99.9132404 99.9482236 100.01886  
99.8145705 99.8786681 100.001452 100.269141  
99.8890966 100.023696 100.055859 100.197372  
100.076559 99.8963937 100.350876 100.227049  
100.118121 99.9620225 100.222616 100.189196  
99.9932899 99.9851684 99.9847569 99.9946346  
99.826896 99.7447736 99.728631 99.9929691  
100.018657 99.8612354 99.847266 99.9673809  
100.086304 99.9147053 100.223009 100.045357  
100.203683 99.5900772 100.309825 100.131206  
99.9983061 99.8190455 99.9908458 100.185108  
100.010345 99.9270107 100.063323 100.105164  
100.429124 100.077019 100.152496 100.005082  
100.117691 100.095184 99.9596157 99.9664724  
100.056207 99.9508891 99.7453263 100.150889  
100.20354 99.9202721 99.7916804 100.055804  
100.055061 99.9189536 99.8604258 100.144682  
100.133456 99.8552292 99.8329277 100.182988  
99.9932899 100.046402 99.9672759 100.061255  
100.012351 99.9816526 99.8339097 100.123484  
99.9018521 100.012856 99.9480272 100.205094  
99.8188701 99.9032789 100.007934 100.155735  
100.095047 99.9340424 99.9662938 99.8662391  
99.9759482 100.016371 99.9543125 100.047779  
100.003752 99.8309114 100.03936 100.057772  
100.077992 100.121846 100.215938 99.8992465  
100.237363 100.021645 100.176066 99.8653307  
100.461515 99.9548444 100.223795 99.8998521  
100.279929 99.8731014 100.072947 99.9019718  
100.138759 99.9268642 100.036807 99.7192203  
100.022957 99.932138 99.9254394 99.7469283  
100.011491 99.9478127 99.892638 99.7214914  
100.171723 100.174291 99.7457191 99.6890897  
100.148505 100.06823 99.5110025 99.7336042

|            |            |            |            |
|------------|------------|------------|------------|
| 99.9831142 | 100.105878 | 99.7545578 | 99.7838722 |
| 99.7366047 | 99.8903875 | 99.7608431 | 99.8533693 |
| 99.8462441 | 100.02853  | 99.9607942 | 99.885771  |
| 99.6076172 | 100.133273 | 100.018148 | 99.8748695 |
| 99.9634795 | 100.12712  | 100.065091 | 99.8978838 |
| 99.8585696 | 100.327376 | 100.312967 | 99.9431553 |
| 99.7880564 | 100.077898 | 100.035432 | 100.02098  |
| 99.8632991 | 99.9987922 | 100.075304 | 99.9442152 |
| 99.6547693 | 100.014613 | 100.099071 | 99.9737401 |
| 99.8138539 | 100.032632 | 100.209456 | 99.8320205 |
| 99.7625455 | 100.068816 | 100.153871 | 99.8470101 |
| 99.7341683 | 100.113496 | 100.009898 | 99.9551167 |
| 99.9074415 | 100.176635 | 100.20926  | 99.9805535 |
| 99.78476   | 100.080975 | 100.172334 | 99.9632928 |
| 99.9077282 | 99.8016129 | 100.170566 | 100.121213 |
| 99.8853703 | 99.9382907 | 100.274666 | 99.9599618 |
| 99.9352455 | 100.038638 | 100.157406 | 99.9004578 |
| 100.162694 | 100.203882 | 100.100642 | 99.8763836 |
| 100.118838 | 99.993079  | 99.8934237 | 99.8851654 |
| 100.048755 | 99.8583056 | 100.019719 | 99.9349792 |
| 99.9325224 | 100.091962 | 99.8629792 | 99.8944014 |
| 99.9415516 | 99.9412205 | 100.06568  | 99.9938776 |
| 100.16126  | 100.00641  | 100.158388 | 99.8895562 |
| 100.070252 | 100.28753  | 100.095339 | 99.901669  |
| 99.7092307 | 100.139425 | 99.933296  | 100.021586 |
| 99.8085511 | 100.251639 | 99.7952159 | 100.044903 |
| 99.7648386 | 100.119942 | 99.8739785 | 99.8648765 |
| 99.9001322 | 100.07907  | 99.9690437 | 99.8830456 |
| 100.070969 | 100.250906 | 99.9093333 | 99.8825914 |
| 99.8562184 | 99.8750473 | 100.512144 | 100.22906  |
| 99.9232761 | 99.8314616 | 99.853728  | 100.169077 |
| 100.166129 | 99.9144972 | 100.328684 | 100.09286  |
| 99.7706364 | 99.7051585 | 100.504925 | 100.016984 |
| 100.113335 | 100.098225 | 99.1395518 | 100.143273 |
| 100.419541 | 100.230891 | 99.8066805 | 100.040054 |
| 100.129821 | 100.211803 | 99.982673  | 100.20787  |
| 100.088327 | 100.339537 | 99.6145076 | 100.322196 |
| 99.8725197 | 100.154855 | 99.3700597 | 100.089271 |
| 99.9886667 | 100.151832 | 100.261473 | 99.8515607 |
| 99.7639677 | 100.105065 | 100.034201 | 99.877878  |
| 99.8923407 | 100.053685 | 99.7832812 | 99.7652605 |
| 99.7232143 | 99.9054301 | 100.310014 | 99.7543235 |
| 99.6198491 | 100.071342 | 100.270434 | 99.7025433 |
| 99.9166074 | 100.026802 | 99.7758133 | 99.6991255 |
| 99.957546  | 99.6407344 | 99.6396494 | 99.7992679 |
| 99.706913  | 99.6358032 | 100.274168 | 99.8014895 |

99.8041653 99.8710705 100.121326 99.985027  
99.9143845 99.8238262 99.9632565 99.8095214  
99.8573298 100.010258 100.046399 99.9342722  
99.9158664 99.9356537 100.169618 99.8623269  
100.029605 99.900817 100.293087 99.898385  
99.8740017 99.9345402 100.125558 99.8770236  
99.992742 99.9708086 99.5828936 99.9537539  
100.181875 99.9078161 100.131034 99.8597635  
99.860479 99.9663546 100.250769 99.9578552  
99.7800838 99.8830009 99.9254194 100.157286  
100.056651 99.942812 99.8129037 100.219832  
100.403239 100.287521 100.213181 99.9166704  
100.385456 100.307723 100.340881 99.9470891  
100.315805 100.243776 100.260477 100.090638  
100.092588 100.252366 99.6672804 100.092176  
100.287833 100.341287 99.9821751 100.062612  
100.096848 100.249025 100.259731 99.9829763  
100.167055 100.534082 100.102408 99.9706721  
100.017194 100.276863 99.7554012 99.9513614  
100.092958 100.168376 99.8353072 99.9395699  
100.112223 100.096475 100.477045 100.03732  
100.051834 100.068956 100.109627 99.8642067  
100.091106 100.031097 100.150202 99.9277783  
100.054613 100.252207 99.7877619 99.958197  
100.243005 100.396167 100.090708 100.014762  
100.220775 100.256661 100.190279 99.9954514  
100.076842 100.129403 100.138751 99.7490258  
99.9727359 100.409529 100.417551 100.023136  
100.012563 100.370715 99.7038729 100.16378  
100.227444 100.267478 99.7842769 100.060219  
100.077398 100.021075 100.138751 100.08329  
100.147975 100.265887 100.209447 100.084144  
100.055169 100.116359 100.303791 100.252472  
100.058503 100.005327 99.8031955 100.147374  
100.091291 100.264137 99.7491779 100.252301  
100.080547 100.050345 100.090459 100.022281  
100.191137 100.193668 100.245293 99.8525861  
99.9127173 99.9464706 100.54326 99.9826345  
99.9036404 99.7931253 99.7526629 100.111145  
99.9082715 99.8580266 99.5908594 100.051846  
99.9706982 99.8615262 99.9055051 99.7758558  
99.724511 99.7767409 99.9729648 99.9544374  
99.7882344 99.7988519 100.203971 100.08346  
99.9555083 99.7889894 99.7596329 100.049453  
99.8888211 99.788035 99.5248933 99.9759697  
100.009043 99.8903182 99.6857012 100.077479



99.9794046 99.7913755 100.07403 100.047915  
99.8293582 99.6976821 99.8689126 99.8896695  
99.8662215 99.9205419 100.186297 100.217781  
99.9371693 99.847687 99.7855215 100.239997  
99.9616213 100.185556 99.6267051 100.192318  
99.9041962 99.9342221 100.176837 100.237092  
99.7560022 99.7115214 100.208451 100.203939  
99.8958603 99.8258941 100.343868 100.06808  
100.03683 99.9181558 100.248778 100.143443  
100.084622 100.005009 99.5276315 100.04313  
100.0372 100.105383 99.7583883 99.9951096  
100.096107 100.053208 100.287113 99.8589091  
99.9510625 100.041755 99.9776944 99.8954799  
99.9882962 100.090113 100.231104 99.9337595  
100.001263 99.9113157 99.9045094 99.8775362  
100.09833 99.918474 99.3217675 99.9870777  
100.070359 99.6720716 100.023746 99.9470891  
99.884931 99.7442902 100.102657 99.9129108  
99.9099387 100.001987 100.048888 100.109778  
99.9473577 99.7045222 99.804938 100.163096  
99.9271662 99.8777515 99.2458443 100.298955  
99.9060486 99.74604 100.00433 100.021769  
99.8280615 99.6855927 99.7810408 99.9995528  
99.6752366 99.7237699 100.307774 100.027066  
99.7447025 99.7174071 100.06233 100.032193  
100.013304 99.874411 99.9846644 99.9884448  
99.8113897 99.6233956 100.177335 99.810205  
99.7808247 99.7331552 99.3872358 99.8462631  
100.217256 99.894295 99.8303287 99.9990401  
100.069432 99.8869777 100.268194 99.9870777  
100.235039 99.9278592 100.231851 99.9327342  
100.468259 100.096316 100.038931 99.944013  
100.196509 100.059889 99.9401062 100.018864  
100.20892 100.011213 100.059841 100.1255  
100.212625 100.036823 99.9891451 99.9253859  
99.9471724 100.080886 100.249524 100.070473  
99.909383 100.141016 100.448667 100.118151  
100.181328 100.489212 99.9590511 100.136141  
100.369362 100.515054 100.186376 100.016505  
100.195249 100.407537 100.170938 100.028639  
100.159796 100.586839 100.360417 100.045388  
100.118959 100.627516 100.234679 100.19801  
100.106337 100.525104 99.7506496 100.133407  
100.056776 100.404985 100.016318 100.224501  
100.175945 100.27705 100.195588 100.012232  
100.095014 100.330329 100.550145 99.9447228

|            |            |            |            |
|------------|------------|------------|------------|
| 100.122115 | 100.273859 | 100.397765 | 100.016163 |
| 100.165736 | 100.167618 | 99.8241005 | 99.9623264 |
| 100.203231 | 100.307039 | 99.4946916 | 100.007447 |
| 100.229404 | 100.368136 | 99.852485  | 100.176476 |
| 99.9459603 | 99.9816174 | 100.365646 | 100.083501 |
| 100.454933 | 100.37659  | 100.148032 | 100.002661 |
| 100.017981 | 99.9178091 | 100.672148 | 99.7502279 |
| 100.185968 | 99.6933636 | 99.7919813 | 99.7825298 |
| 100.452891 | 100.068078 | 99.2748367 | 100.002661 |
| 100.355812 | 100.047499 | 99.943614  | 99.9635228 |
| 100.099098 | 99.8071018 | 100.154007 | 100.020948 |
| 100.365835 | 100.203511 | 100.445321 | 100.274578 |
| 100.267456 | 100.019264 | 100.216005 | 100.150839 |
| 100.327226 | 100.173042 | 99.8350559 | 100.00437  |
| 100.191166 | 100.235255 | 100.452293 | 99.9286573 |
| 100.025777 | 100.213401 | 99.8990454 | 100.113752 |
| 99.8783943 | 100.241955 | 100.166706 | 100.119221 |
| 100.097241 | 100.335753 | 100.161477 | 100.18468  |
| 99.8037746 | 100.048776 | 100.090516 | 100.105036 |
| 99.8685564 | 100.21691  | 100.35718  | 100.069658 |
| 100.168891 | 100.279921 | 99.7728093 | 100.073418 |
| 99.9288832 | 100.0006   | 100.104459 | 99.8746499 |
| 100.146988 | 100.119603 | 100.299415 | 99.8517481 |
| 100.021879 | 100.149912 | 100.306636 | 100.172032 |
| 99.9129198 | 100.018148 | 99.852734  | 100.035988 |
| 100.044339 | 99.936154  | 99.8748937 | 99.9859119 |
| 99.7790871 | 99.7215988 | 100.457522 | 99.8495262 |
| 99.8340309 | 99.9921458 | 100.103712 | 100.086065 |
| 99.9036387 | 100.02389  | 99.6971175 | 100.141952 |
| 99.8399707 | 100.001079 | 100.225466 | 99.9859119 |
| 99.7803864 | 99.9993242 | 100.256839 | 99.8804608 |
| 99.8828492 | 99.9889553 | 100.534708 | 99.8843918 |
| 100.021508 | 99.9840102 | 99.8624444 | 99.9170354 |
| 100.125456 | 100.019264 | 99.3878765 | 99.9508755 |
| 99.9940362 | 99.8551175 | 100.155252 | 100.086065 |
| 100.039328 | 99.8284776 | 100.222977 | 100.082134 |
| 100.063087 | 99.9588059 | 99.8547258 | 100.288592 |
| 100.038585 | 99.8988262 | 99.6719699 | 100.204676 |
| 100.145503 | 99.8468225 | 99.7172854 | 100.063676 |
| 99.9190453 | 99.769455  | 99.8011938 | 100.203992 |
| 99.9893957 | 99.5673424 | 99.9007883 | 100.099738 |
| 100.337621 | 99.6794854 | 99.3612349 | 99.9560028 |
| 100.298826 | 99.935835  | 99.6229196 | 100.045559 |
| 100.080164 | 99.8115684 | 99.906764  | 100.100763 |
| 100.056776 | 99.7932236 | 99.6283973 | 99.8187626 |
| 100.193579 | 99.7530244 | 99.6933827 | 99.8862718 |

100.363979 99.8413988 99.9724964 99.7765479  
100.240355 100.0207 99.7093178 99.804748  
100.116175 100.085146 99.5888084 99.9038754  
99.8945433 99.8812789 100.583758 99.7932971  
99.9361224 100.090091 99.6129601 99.9327591  
99.7833563 100.205744 99.7165384 99.9713846  
100.08926 100.09392 99.432943 100.083672  
99.8965851 100.117688 99.4302041 100.094439  
99.7087367 99.9462038 99.3711944 100.074785  
99.996078 99.7951378 99.359741 99.825428  
100.056776 99.8661245 100.097737 99.7818461  
100.02652 99.9908696 99.4526129 100.029665  
99.9541277 99.9701319 99.0636962 99.8606354  
100.025777 99.8709101 99.8390397 99.6172604  
100.087218 99.7664241 99.6963705 99.7815043  
100.038585 99.572447 99.5143615 99.7751807  
99.9305538 99.5421381 99.6376098 99.9438682  
100.255576 99.5955775 99.4575926 99.7779152  
100.098726 99.5400643 99.8415296 99.6295659  
100.160909 99.6124867 100.13857 99.8741372  
100.10875 100.001877 99.8736488 100.110505  
99.9138479 100.091846 100.080805 99.9971919  
99.8912021 99.9951766 100.429386 99.8982354  
99.7987629 100.075096 100.405235 100.112385  
99.7612674 100.140659 100.353943 100.184509  
99.69927 100.149752 100.636294 100.131869  
99.753657 100.382333 101.015998 100.037868  
99.7094792 100.075416 100.4996 100.147079  
99.8156544 100.128536 99.97897 100.048465  
99.6385719 99.858946 100.715721 99.7727879  
99.7878112 100.170809 100.284227 100.043679  
99.7135628 100.203351 99.9729944 99.9799301  
99.9331525 100.1204 100.334772 99.9525846  
99.9080937 100.137788 100.24663 100.119905  
99.7640517 100.169692 100.409716 100.074443  
99.9402061 100.176871 99.5912983 100.063334  
99.6454399 99.8876598 100.175669 99.9896719  
99.6239079 99.7946592 100.332282 99.8452535  
99.824193 100.060261 100.137325 100.056668  
99.7840988 99.940142 99.9144826 99.9700174  
100.004802 99.8437916 100.024286 100.117854  
99.8438688 99.8265634 100.212021 100.333883  
99.6719837 99.785088 100.342739 100.114436  
99.8713407 99.9372707 99.9363934 100.138021  
99.8483237 99.8654864 100.444823 100.056668  
99.6245008 99.8183938 100.443015 100.098979

99.7393556 99.8874691 99.8908049 100.333563  
99.7660316 99.6296305 100.087649 100.038838  
99.7236094 99.5416152 100.249654 99.9568276  
99.6532145 99.7532975 100.266577 100.000737  
99.680261 99.5390687 100.295693 99.982285  
100.027419 99.6673513 100.220538 100.057632  
99.7984503 99.4174707 100.700083 100.180306  
99.8890374 99.6387026 100.051814 100.069763  
99.9010786 99.8686883 99.5837173 100.222678  
99.8440217 99.4962547 99.2161579 100.321774  
99.9831442 99.6702162 99.5063233 99.9735714  
99.5681849 99.4749274 100.124231 100.123753  
99.7599184 99.4174707 100.093373 100.263683  
100.027789 99.7052313 100.216059 100.076084  
99.9535043 99.7201923 100.420369 99.9248778  
99.9662865 100.174434 100.536087 100.096074  
100.148016 100.060794 100.028173 100.074376  
100.359386 100.269611 99.4378881 99.9906569  
100.118747 100.198626 100.188187 100.013893  
100.138383 100.08801 100.253636 99.9908278  
100.096332 100.361606 100.400461 100.060878  
99.9375728 100.179686 100.299425 100.152627  
100.233417 100.353966 99.3547703 100.175009  
100.133937 100.136076 100.28972 99.94931  
100.131344 99.6700571 100.25488 99.8659328  
100.004633 100.003656 100.205607 100.165442  
99.8844061 99.8271476 100.406931 100.107351  
99.9701768 99.6940902 99.8920491 99.942305  
100.074102 99.630108 99.5483798 100.142376  
100.069656 99.6940902 99.8711453 99.9868981  
100.03909 99.841472 99.9756646 99.7589776  
100.018342 100.182074 99.9873608 99.7880229  
100.106335 100.330251 100.243931 99.9906569  
99.9485025 100.112998 100.023943 99.9669081  
100.067433 100.158359 100.083668 100.030124  
99.7688103 99.7907001 100.295195 100.037984  
99.7110124 99.8647093 100.154592 100.002958  
99.7521379 99.6897929 100.1745 99.9566568  
99.9286808 99.9056133 99.7616489 100.128708  
100.002595 99.8088443 99.8310796 99.9945866  
100.051687 100.021004 99.8452643 99.9675915  
100.048908 99.9280548 99.9072293 100.117602  
100.099666 100.153584 99.4281827 100.192778  
100.163207 100.17905 99.5018439 100.060537  
100.088737 100.222659 100.000301 99.8592694  
100.087996 100.256719 99.7852902 99.8722544

|            |            |            |            |
|------------|------------|------------|------------|
| 100.12875  | 100.594297 | 99.6735541 | 99.9915112 |
| 100.044462 | 100.170137 | 99.6421983 | 99.7921234 |
| 99.9294218 | 99.9888538 | 99.9239026 | 99.8416714 |
| 99.9679538 | 100.242713 | 99.467253  | 100.03918  |
| 99.9811065 | 99.9915595 | 99.20048   | 99.6979823 |
| 100.026122 | 100.240008 | 99.5317065 | 99.7195101 |
| 100.018156 | 100.100584 | 99.7021725 | 99.7890481 |
| 100.049093 | 100.138941 | 99.2811092 | 100.021582 |
| 100.089478 | 100.039148 | 100.132195 | 99.8980535 |
| 99.8862586 | 99.9804183 | 100.323564 | 100.01731  |
| 99.9351646 | 100.12032  | 100.11353  | 99.9349582 |
| 100.000002 | 100.263563 | 99.6120868 | 100.04123  |
| 100.080956 | 100.202605 | 100.08541  | 99.9578528 |
| 99.8751437 | 100.056815 | 100.234225 | 99.9011289 |
| 99.965916  | 100.38723  | 100.228502 | 100.122215 |
| 100.070953 | 100.294122 | 100.083917 | 100.109914 |
| 99.95406   | 100.009545 | 100.333021 | 100.166979 |
| 99.7541756 | 99.9355353 | 100.226013 | 100.027732 |
| 99.7838156 | 99.8890607 | 100.520658 | 99.9628076 |
| 99.669887  | 99.9150037 | 100.407926 | 100.148014 |
| 99.7352802 | 99.9657757 | 99.5772471 | 99.9351291 |
| 100.287695 | 100.028007 | 100.384036 | 99.9325662 |
| 99.9612848 | 99.6905887 | 100.964367 | 100.054044 |
| 99.6289468 | 99.7860844 | 100.706055 | 99.9722046 |
| 100.125786 | 99.9091148 | 100.384783 | 99.9877524 |
| 100.109485 | 99.9304422 | 100.451725 | 100.111451 |
| 99.7495444 | 99.9345804 | 100.62891  | 100.138446 |
| 99.8827389 | 99.9143671 | 99.7643863 | 100.053019 |
| 100.084476 | 100.008908 | 99.5242409 | 100.078647 |
| 99.9242348 | 100.009385 | 100.036136 | 99.8403045 |
| 100.022047 | 100.377522 | 99.8071895 | 99.8541438 |
| 99.9162691 | 100.155016 | 100.039372 | 100.044476 |
| 100.386618 | 100.511216 | 99.8524811 | 100.081039 |
| 99.8738469 | 100.036443 | 100.305149 | 99.9083048 |
| 99.7525084 | 100.267701 | 100.087401 | 100.012185 |
| 99.8912604 | 100.15804  | 99.873385  | 100.1012   |
| 100.031309 | 100.144512 | 99.7708566 | 100.158095 |
| 99.9507255 | 100.031986 | 100.005527 | 99.8153597 |
| 100.107262 | 100.349828 | 99.8213742 | 99.8937822 |
| 99.8908899 | 99.9964935 | 99.9313683 | 99.8667871 |
| 100.125786 | 100.258311 | 99.6578762 | 99.8714002 |
| 100.126527 | 100.118091 | 99.9562538 | 99.7024246 |
| 100.00204  | 99.9484273 | 99.7865345 | 99.7376207 |
| 100.239345 | 99.9070458 | 99.4754652 | 99.7234397 |
| 100.048352 | 99.71685   | 99.8233651 | 99.9161642 |
| 100.037978 | 99.7171683 | 99.4533171 | 100.01133  |

|            |            |            |            |
|------------|------------|------------|------------|
| 100.206926 | 99.7147809 | 99.1601654 | 99.8859228 |
| 100.186363 | 99.6581201 | 99.7230763 | 99.9744257 |
| 100.382728 | 100.087055 | 100.11577  | 100.180989 |
| 100.191365 | 99.8889016 | 100.225515 | 100.153653 |
| 100.066507 | 100.140851 | 100.56147  | 99.9394004 |
| 100.126342 | 100.389936 | 100.668976 | 100.064808 |
| 100.154315 | 100.284572 | 100.357409 | 100.182698 |
| 100.216402 | 100.369047 | 100.514734 | 100.17728  |
| 100.030346 | 100.274821 | 100.763675 | 99.9705182 |
| 100.121521 | 100.372389 | 100.11344  | 100.009649 |
| 100.120965 | 100.207813 | 100.315332 | 99.9230142 |
| 100.111699 | 100.359179 | 100.63074  | 100.101923 |
| 100.15321  | 100.232484 | 100.44503  | 100.180527 |
| 100.196018 | 100.388783 | 99.93719   | 100.101239 |
| 100.189902 | 100.29233  | 100.155511 | 100.103461 |
| 100.057958 | 100.210678 | 100.727329 | 100.115251 |
| 100.161734 | 100.408679 | 100.319315 | 100.145155 |
| 100.107067 | 100.466137 | 99.8234239 | 100.118669 |
| 100.052955 | 100.17789  | 100.669824 | 99.9426651 |
| 100.255504 | 100.342148 | 100.621778 | 99.914983  |
| 100.060182 | 100.263202 | 100.078091 | 100.108245 |
| 100.165811 | 100.172001 | 99.6999491 | 100.117985 |
| 100.186196 | 100.069181 | 100.266788 | 100.034255 |
| 99.9940246 | 99.9994666 | 100.545851 | 99.9365136 |
| 99.8807972 | 99.9291159 | 99.9650714 | 100.09355  |
| 99.8728287 | 99.8824806 | 99.823175  | 100.107562 |
| 99.8774616 | 99.8184965 | 100.559543 | 99.8587643 |
| 100.199724 | 100.003605 | 100.347694 | 99.8022038 |
| 100.024416 | 99.9423265 | 99.9551138 | 100.085177 |
| 100.031458 | 100.0426   | 99.649663  | 99.9770115 |
| 100.052769 | 99.8325029 | 100.014611 | 99.8965282 |
| 100.002549 | 99.7234752 | 100.656381 | 99.9383932 |
| 100.082976 | 99.9251368 | 100.132111 | 100.079709 |
| 100.090574 | 99.8239081 | 99.6526502 | 100.030667 |
| 100.098727 | 99.8815256 | 100.113689 | 99.9618034 |
| 100.10929  | 100.056607 | 99.721607  | 99.8946486 |
| 100.011259 | 99.7637438 | 99.7811039 | 99.9033633 |
| 100.286637 | 99.9822769 | 99.6862573 | 99.8462902 |
| 100.347791 | 100.026525 | 99.9259877 | 99.942836  |
| 100.563868 | 99.9967608 | 100.099749 | 100.047242 |
| 100.205839 | 99.8632217 | 99.93719   | 100.109612 |
| 100.104843 | 99.8705433 | 100.031539 | 100.103119 |
| 100.119853 | 100.065361 | 100.310104 | 100.052198 |
| 99.7712762 | 100.05215  | 100.916276 | 100.164293 |
| 99.8685664 | 100.220387 | 100.293176 | 100.272288 |
| 99.9061854 | 100.086052 | 100.108959 | 100.192488 |

99.8187168 99.8067183 100.638955 100.038869  
99.963633 99.958243 100.353918 100.196418  
99.8131573 99.6464395 100.006396 100.115251  
99.9519581 99.8340946 99.6446841 100.013579  
100.011629 99.9018987 100.464199 99.864745  
99.815937 99.6117416 100.158748 100.068431  
99.732916 99.4571928 99.7524757 100.002301  
99.789437 99.5867528 100.108462 100.01768  
99.6315488 99.4511445 100.172439 100.169078  
99.9564057 99.7809336 99.8851613 100.216069  
100.220665 99.777432 100.342715 99.9120781  
100.078343 99.7799786 99.8774441 100.059716  
100.077602 99.7244302 99.36587 99.9575315  
100.252539 99.8250222 99.8296474 99.8765355  
100.373549 99.8764324 99.5027877 100.06638  
100.448972 99.8762732 99.2033114 99.9389058  
100.427105 100.114543 99.6904893 99.728043  
100.316843 100.056766 99.7900658 99.7996407  
100.190644 100.01029 99.4908385 99.8910601  
99.9602973 99.9596755 100.20057 99.9001166  
100.169703 100.356314 99.7865806 100.252124  
100.013112 100.338806 99.840103 99.9424943  
99.7773916 100.306654 100.319066 99.7215496  
99.8483671 100.397378 100.127132 100.129263  
99.4731046 100.087325 100.071618 100.178134  
99.5425977 100.235985 100.786328 100.022636  
99.6146851 100.24267 100.603606 100.144642  
99.6662027 100.357905 100.180406 100.155066  
99.5959683 100.098626 101.028299 99.942836  
99.8978462 100.126321 100.507514 100.224442  
99.956591 100.19126 99.8381114 100.048438  
99.7408845 99.8648134 100.201068 100.093721  
99.6480418 100.117408 99.755463 100.244264  
99.6786188 100.125843 100.260565 99.956848  
99.6473006 99.9751144 100.325787 100.09936  
99.7949965 99.8769099 100.10871 100.061254  
100.075378 99.9829135 99.9364432 99.8327909  
99.913042 99.7963726 99.9889698 99.919084  
99.9780875 99.7825253 99.7420201 100.027762  
100.362986 99.9767061 99.4042069 99.8095516  
100.181748 100.058039 100.220236 99.8186081  
99.9908742 100.191897 99.7816018 100.156433  
99.7584894 99.9187702 99.5543185 99.8199751  
99.9104476 100.169295 99.2359227 99.7910968  
100.06778 100.034642 99.2662935 99.8336453  
99.9612239 100.097353 99.7621844 99.8650868

|            |            |            |            |
|------------|------------|------------|------------|
| 100.214179 | 100.077935 | 99.4408013 | 100.099872 |
| 100.24142  | 100.086371 | 99.3165796 | 99.9899982 |
| 100.367249 | 100.062337 | 100.023822 | 99.8931107 |
| 100.271997 | 100.154493 | 100.034028 | 99.8850794 |
| 100.127822 | 100.103401 | 99.5279307 | 100.015117 |
| 99.9258287 | 99.8372779 | 99.7738846 | 100.185311 |
| 99.8908042 | 99.8275688 | 99.607094  | 99.9753027 |
| 99.7507062 | 99.9499664 | 100.022079 | 99.9153247 |
| 99.8541119 | 100.070295 | 100.122402 | 99.9127616 |
| 100.059255 | 99.9443957 | 99.7430159 | 99.8121147 |
| 99.7484824 | 99.8533535 | 100.049214 | 99.9705182 |
| 99.7419964 | 99.8969646 | 99.6309924 | 99.9701764 |
| 99.8120454 | 99.9138361 | 99.2540954 | 99.7695662 |
| 99.9829057 | 99.8630626 | 99.8732121 | 99.7637564 |
| 99.9767903 | 100.035597 | 99.9424178 | 99.9202802 |
| 100.009142 | 99.4740756 | 100.043899 | 99.6954378 |
| 100.177531 | 99.7012008 | 100.087534 | 99.887714  |
| 100.617047 | 99.7888576 | 99.6081729 | 99.999047  |
| 100.372537 | 99.6182398 | 99.3127939 | 99.8102274 |
| 100.208228 | 99.6863304 | 99.4573366 | 99.7583776 |
| 99.9874943 | 99.3242763 | 99.9190761 | 99.6049887 |
| 100.14506  | 99.8167199 | 99.4730706 | 99.935387  |
| 100.06397  | 99.9026549 | 99.6509693 | 99.813684  |
| 100.131575 | 99.9165861 | 99.9597746 | 99.62256   |
| 100.028305 | 100.057463 | 99.6528574 | 99.6876603 |
| 100.097506 | 99.8375384 | 100.185924 | 99.8051864 |
| 99.9676212 | 99.8306511 | 100.237322 | 99.9503658 |
| 99.9330206 | 99.9230039 | 99.7537645 | 100.088488 |
| 100.123412 | 99.7099664 | 100.07222  | 100.177785 |
| 100.015885 | 99.5697155 | 99.6471931 | 99.90903   |
| 99.7965701 | 99.252116  | 99.5039092 | 99.6552542 |
| 99.8295738 | 99.3261547 | 99.8573989 | 99.7779653 |
| 100.047824 | 99.5265132 | 99.9711031 | 100.07855  |
| 99.8975328 | 99.5639239 | 100.040542 | 100.008265 |
| 99.8609804 | 99.6979136 | 100.033829 | 100.000343 |
| 99.8734012 | 99.7732046 | 100.15089  | 99.8056185 |
| 99.9846553 | 99.7681956 | 99.8133438 | 99.7216507 |
| 99.8120073 | 99.4881633 | 99.7556526 | 99.4703234 |
| 100.05705  | 99.7306284 | 99.8345322 | 99.728276  |
| 100.121816 | 99.611196  | 100.151939 | 99.6731136 |
| 100.034516 | 99.7564559 | 99.8246723 | 99.6202556 |
| 99.8875963 | 99.6052478 | 99.6203405 | 99.569126  |
| 99.7387251 | 99.3604348 | 99.9169782 | 99.574455  |
| 100.293044 | 99.7312545 | 100.095297 | 99.8208854 |
| 99.8370262 | 99.8503739 | 100.009494 | 99.8237659 |
| 100.107798 | 100.344696 | 100.269209 | 99.8426335 |



|            |            |            |            |
|------------|------------|------------|------------|
| 100.160142 | 100.35174  | 100.257881 | 99.9896852 |
| 99.8599158 | 99.993912  | 99.8557206 | 99.7423906 |
| 99.8778371 | 99.9870247 | 99.8301267 | 99.9215604 |
| 99.6693465 | 99.9663627 | 99.972152  | 99.8180049 |
| 100.021208 | 100.074055 | 99.9383764 | 99.9518061 |
| 99.7580659 | 100.152633 | 99.9469777 | 100.027276 |
| 100.041968 | 99.92363   | 100.008235 | 100.070484 |
| 99.9369243 | 100.064037 | 100.20984  | 100.099434 |
| 99.8900804 | 99.8519392 | 100.133478 | 99.8672621 |
| 100.153755 | 100.108335 | 100.180889 | 99.9541105 |
| 100.015175 | 100.124928 | 99.9671171 | 99.8784963 |
| 99.9599913 | 100.067481 | 100.467247 | 99.7480077 |
| 100.083844 | 100.239664 | 100.262706 | 99.6892446 |
| 99.9876718 | 100.038367 | 100.458227 | 99.8483946 |
| 100.119509 | 100.217437 | 100.53312  | 99.9277535 |
| 100.262347 | 100.468824 | 100.21991  | 99.9928538 |
| 100.121993 | 100.279423 | 100.174596 | 99.9605917 |
| 100.1243   | 100.219002 | 100.061731 | 100.056226 |
| 100.056518 | 100.07609  | 99.9350198 | 100.229634 |
| 100.29127  | 100.040558 | 99.7904771 | 100.23986  |
| 100.274235 | 100.148407 | 99.8569794 | 100.27846  |
| 100.047291 | 100.058872 | 99.8773286 | 100.029293 |
| 100.152512 | 100.280205 | 99.6094316 | 100.02382  |
| 99.9699279 | 100.089395 | 100.011172 | 100.062131 |
| 99.9429572 | 100.084699 | 99.808309  | 100.059538 |
| 100.278317 | 100.376002 | 99.7411774 | 100.019499 |
| 100.293754 | 100.417013 | 99.8181689 | 100.056658 |
| 100.106023 | 100.185192 | 99.5756561 | 99.9925657 |
| 100.105669 | 100.246552 | 99.3956595 | 99.9775869 |
| 99.8950487 | 100.164686 | 99.987886  | 100.210191 |
| 99.5873698 | 99.793397  | 100.105366 | 99.8437857 |
| 99.9055176 | 100.118353 | 99.8953702 | 99.9594395 |
| 99.9211322 | 100.059185 | 100.084178 | 100.120606 |
| 99.9614108 | 100.105518 | 100.462842 | 100.173464 |
| 99.8544152 | 100.183157 | 100.360886 | 100.170727 |
| 99.9459736 | 100.133067 | 100.225784 | 99.9696654 |
| 99.8773048 | 99.9305173 | 100.146904 | 100.080566 |
| 100.314514 | 100.396507 | 100.261237 | 100.042831 |
| 100.160142 | 100.291476 | 100.235014 | 100.181961 |
| 100.068584 | 100.151538 | 100.126555 | 100.11182  |
| 99.863642  | 99.8762014 | 100.187812 | 99.8051864 |
| 99.7135288 | 99.78604   | 100.110821 | 100.043983 |
| 99.8627548 | 99.9751284 | 100.166414 | 100.240148 |
| 99.9025011 | 99.9984514 | 99.9408938 | 100.215088 |
| 99.9182932 | 100.210863 | 100.026067 | 100.257    |
| 100.093425 | 100.239821 | 100.095506 | 100.251671 |

|            |            |            |            |
|------------|------------|------------|------------|
| 100.082602 | 100.21415  | 99.9293556 | 100.229634 |
| 99.8808536 | 100.190514 | 99.9585159 | 100.246054 |
| 100.105314 | 100.040558 | 100.59207  | 100.164246 |
| 100.383538 | 100.439083 | 100.463681 | 100.097418 |
| 99.9017914 | 100.094248 | 100.064248 | 100.235395 |
| 99.8751756 | 99.913299  | 99.5968445 | 100.079846 |
| 99.7600177 | 99.8319034 | 99.7936239 | 100.074805 |
| 99.8746432 | 99.9610407 | 100.145016 | 100.105627 |
| 100.116137 | 100.167973 | 99.7820857 | 99.9073017 |
| 100.003641 | 100.382107 | 99.5502719 | 100.182682 |
| 99.9929949 | 100.305563 | 99.7596386 | 100.316051 |
| 99.6769764 | 99.8605484 | 99.986837  | 100.146531 |
| 100.085973 | 100.043845 | 100.112289 | 100.294159 |
| 100.024047 | 100.001425 | 100.163267 | 100.104043 |
| 99.8820957 | 99.8331556 | 100.252007 | 99.9071577 |
| 100.14435  | 99.8658704 | 100.025228 | 100.215664 |
| 99.7816653 | 99.7999712 | 100.134736 | 100.117293 |
| 99.6988013 | 99.7891707 | 100.130331 | 100.097562 |
| 100.109217 | 100.121484 | 100.25872  | 100.328149 |
| 100.197937 | 100.117414 | 99.8907549 | 100.266361 |
| 100.172386 | 100.046663 | 99.8479586 | 100.158053 |
| 99.9693956 | 100.077812 | 99.9450896 | 100.064003 |
| 100.185871 | 100.405743 | 99.8179591 | 100.310578 |
| 100.172592 | 100.47389  | 99.857349  | 100.174843 |
| 100.083343 | 100.466985 | 100.116845 | 100.026561 |
| 100.394027 | 100.666465 | 99.6949545 | 100.274657 |
| 99.7868546 | 100.279589 | 100.306445 | 99.8824497 |
| 99.9736905 | 100.327772 | 99.8638364 | 99.9819757 |
| 99.9964018 | 100.304701 | 99.5484646 | 100.088405 |
| 100.129831 | 100.191856 | 99.7604564 | 99.9335071 |
| 100.334055 | 100.357749 | 99.2619722 | 100.173836 |
| 100.148284 | 100.335934 | 99.9389648 | 100.078769 |
| 100.193174 | 100.306114 | 100.172721 | 100.047272 |
| 100.071988 | 100.280217 | 99.8864377 | 100.015199 |
| 100.075891 | 100.249142 | 100.10701  | 99.930343  |
| 100.008467 | 100.383489 | 99.751667  | 99.9372465 |
| 100.051406 | 100.405618 | 99.8864377 | 100.076036 |
| 100.261485 | 100.559113 | 99.5264911 | 100.084953 |
| 100.45187  | 100.683729 | 99.7656882 | 100.179014 |
| 100.141364 | 100.402008 | 99.5250262 | 100.22777  |
| 100.076601 | 100.307055 | 99.6415903 | 100.06942  |
| 99.8970399 | 100.289948 | 99.5827851 | 100.01937  |
| 100.127524 | 100.688438 | 99.8069146 | 100.206628 |
| 100.241435 | 100.436537 | 99.8856006 | 100.14838  |
| 100.340975 | 100.5464   | 99.6543559 | 100.339377 |
| 100.170995 | 100.271428 | 99.6847002 | 100.379504 |

|            |            |            |            |
|------------|------------|------------|------------|
| 100.106232 | 100.134884 | 99.7985438 | 100.461052 |
| 100.039695 | 99.9175114 | 100.006559 | 100.322838 |
| 99.7481744 | 99.8928706 | 100.017442 | 100.386839 |
| 99.6715238 | 99.832132  | 99.823447  | 100.388277 |
| 99.8022912 | 99.6659245 | 99.8420722 | 100.190232 |
| 99.5079315 | 99.5263981 | 99.6997677 | 99.9053177 |
| 99.5068669 | 99.7316855 | 99.8029385 | 100.03706  |
| 99.5274491 | 99.7596222 | 100.684389 | 99.8034906 |
| 99.8592468 | 100.094548 | 99.9546601 | 99.9651483 |
| 100.087069 | 99.9721292 | 99.9368721 | 100.228777 |
| 99.9222352 | 100.022823 | 100.041298 | 100.149242 |
| 99.9018305 | 99.963497  | 100.049251 | 99.8427544 |
| 100.099667 | 100.082463 | 100.518856 | 99.6995062 |
| 99.8887005 | 99.8785884 | 100.398525 | 99.8759777 |
| 99.7464001 | 99.6828748 | 100.141121 | 99.7264012 |
| 100.130363 | 100.055154 | 100.177534 | 99.8480759 |
| 99.6860732 | 99.6872694 | 99.9971422 | 99.8631774 |
| 99.612439  | 99.5499403 | 100.005932 | 99.6777888 |
| 99.4227642 | 99.5714421 | 100.161002 | 99.5506488 |
| 99.7788702 | 99.7786128 | 100.09843  | 99.6806653 |
| 99.6839441 | 99.5976523 | 100.202019 | 99.7229494 |
| 99.7483519 | 99.6452074 | 100.223574 | 99.7822047 |
| 99.9454788 | 99.6852291 | 100.154723 | 99.8174415 |
| 99.8191472 | 99.7334119 | 100.193857 | 99.7612065 |
| 99.7662725 | 99.6739288 | 100.246803 | 99.7256821 |
| 99.7125106 | 99.7615056 | 100.166024 | 99.6993623 |
| 99.8239379 | 99.9780932 | 100.121659 | 99.8427544 |
| 99.9220578 | 99.6924486 | 100.384294 | 99.832543  |
| 100.086892 | 99.7200714 | 100.296191 | 99.8401656 |
| 100.286326 | 99.8997763 | 99.8165411 | 99.9464512 |
| 100.30815  | 99.742358  | 100.006978 | 99.9290486 |
| 100.362621 | 100.038361 | 99.952986  | 100.069277 |
| 99.9335908 | 99.912803  | 100.437868 | 99.9135156 |
| 99.6938802 | 99.8712119 | 100.191974 | 99.9520604 |
| 99.7769184 | 100.302504 | 99.9580085 | 100.090706 |
| 99.8077916 | 100.467299 | 100.064946 | 100.087111 |
| 100.013435 | 100.698482 | 99.913643  | 100.195697 |
| 99.8377776 | 100.381448 | 99.6453572 | 100.321831 |
| 100.029404 | 100.314903 | 99.902133  | 100.175418 |
| 99.8384873 | 100.011837 | 100.129192 | 99.9398354 |
| 100.260243 | 100.350373 | 99.9364535 | 100.085672 |
| 100.190867 | 100.402322 | 100.061179 | 100.058634 |
| 100.207368 | 100.257774 | 100.222318 | 99.9867218 |
| 100.139234 | 100.138023 | 100.232572 | 100.087255 |
| 100.181108 | 100.186833 | 100.238223 | 100.188938 |
| 99.8358258 | 99.9255157 | 99.9958866 | 100.057195 |

99.8661667 99.9760528 99.9778893 100.053744  
99.8787644 100.01529 100.263545 99.9509098  
99.8423908 99.9093501 99.8393517 99.9631348  
100.056906 100.126095 100.176488 99.9844207  
100.046792 100.117776 100.058459 100.048422  
100.148638 100.110243 100.147818 99.9581009  
100.056551 99.9253588 100.16728 99.8666292  
100.351798 100.283827 99.336682 99.8966883  
99.7242211 99.7641737 99.7179743 99.459177  
99.762369 99.7748461 99.9228509 99.7251068  
100.031711 99.897893 99.8441649 99.809675  
100.162478 99.9412105 100.018279 99.9378218  
99.8320997 99.7756308 100.177953 99.9848521  
99.9570119 99.8767051 100.284053 99.8882027  
100.09949 99.7958771 100.419661 100.032889  
100.248178 100.304544 99.8560934 100.305435  
100.155558 100.01937 99.9724482 100.130545  
100.075359 99.7170894 100.056994 99.9389724  
100.238774 99.9193948 100.136517 99.9402668  
100.339023 99.8993055 100.384713 99.8784227  
100.311344 100.010895 99.658332 100.093439  
100.047502 99.7348245 100.10408 100.003118  
99.7652079 99.5855674 99.7537597 100.227339  
99.7574009 99.556846 99.9492191 100.136298  
100.331926 99.8575575 99.8828801 100.265596  
99.9979986 99.5345594 99.9370814 100.126518  
100.214998 99.5887063 99.9969329 100.048566  
100.147219 99.6233917 100.088594 99.9588201  
100.085118 99.553864 100.151375 99.8633212  
100.487179 99.9192378 100.028533 99.9639977  
100.368969 99.7814032 100.01252 100.098016  
99.9202819 99.4258129 100.371956 100.142006  
100.111715 99.5432484 100.086084 100.199223  
100.156424 99.4602147 100.296296 100.070989  
100.458387 99.8600584 100.378034 100.104197  
99.930927 99.4458285 100.328572 99.9627373  
100.002603 99.5601366 100.041023 99.8651241  
99.9589588 99.6072046 100.273032 100.117998  
100.012894 99.4689716 100.397106 99.9732318  
100.028861 99.2015752 100.27932 99.9692065  
99.9962164 99.2739755 100.099078 99.9279473  
100.051038 99.4165869 100.072251 99.9191779  
100.061683 99.4006369 100.126953 99.805751  
100.465306 99.7097847 100.370279 99.8812252  
100.266245 99.7151014 100.331925 100.025129  
100.324083 99.6043899 100.102012 99.9372917

|            |            |            |            |
|------------|------------|------------|------------|
| 100.16423  | 99.6172124 | 100.059676 | 99.9969523 |
| 99.9225884 | 99.582185  | 99.9848548 | 100.010322 |
| 100.080312 | 100.277572 | 99.9636869 | 100.163283 |
| 99.8150738 | 100.391411 | 99.9485968 | 100.168171 |
| 99.884976  | 100.373428 | 99.8081757 | 100.009891 |
| 99.9539911 | 100.457087 | 100.070155 | 100.094278 |
| 99.9323463 | 100.405797 | 99.9697648 | 100.200517 |
| 99.8739761 | 100.192818 | 99.8375175 | 99.9049457 |
| 99.994797  | 100.006579 | 99.922818  | 99.9577057 |
| 100.168488 | 99.9405901 | 100.243691 | 100.110235 |
| 100.149505 | 100.201575 | 100.444472 | 100.07487  |
| 100.19102  | 100.350129 | 100.175786 | 100.099453 |
| 100.029748 | 100.129019 | 100.135546 | 100.205117 |
| 99.8290897 | 100.020027 | 100.199259 | 99.8911447 |
| 100.077473 | 100.2169   | 99.9997353 | 100.085077 |
| 100.325679 | 100.39704  | 99.8643442 | 100.196923 |
| 100.09486  | 100.367955 | 99.7134439 | 100.125762 |
| 100.124311 | 100.228471 | 99.9003926 | 100.099597 |
| 100.129811 | 100.301184 | 99.7509594 | 100.158826 |
| 100.012716 | 100.173585 | 100.220637 | 100.207849 |
| 100.188181 | 100.319011 | 100.226086 | 100.292811 |
| 100.070199 | 100.359824 | 99.9844357 | 100.400344 |
| 99.9179755 | 100.020809 | 100.403813 | 99.9887579 |
| 100.227568 | 100.219714 | 99.9789865 | 99.9542555 |
| 100.034893 | 100.201888 | 99.9232372 | 100.089678 |
| 100.009877 | 99.9989169 | 100.028867 | 99.9568431 |
| 99.9962164 | 100.158729 | 100.052341 | 100.017798 |
| 99.8384928 | 99.9909419 | 99.8209603 | 100.049569 |
| 100.144359 | 100.289613 | 99.8930571 | 100.016647 |
| 100.144892 | 100.183436 | 100.026772 | 100.227113 |
| 100.00349  | 100.031442 | 100.023418 | 100.052012 |
| 100.119876 | 100.19923  | 100.216654 | 100.049137 |
| 99.9958615 | 100.239574 | 100.1433   | 100.021679 |
| 99.8516216 | 99.9093157 | 100.263182 | 100.0569   |
| 100.092554 | 100.086329 | 99.9687169 | 100.149913 |
| 99.8888792 | 100.015805 | 99.7941336 | 100.23085  |
| 99.8860405 | 100.118854 | 99.8331162 | 100.114117 |
| 100.121118 | 100.205641 | 99.778834  | 100.01061  |
| 100.067893 | 100.038635 | 99.9561418 | 99.7923813 |
| 100.060974 | 99.9157269 | 100.128001 | 99.9321164 |
| 100.114553 | 100.07851  | 100.051293 | 99.968344  |
| 99.7827839 | 100.025187 | 99.7530552 | 100.072858 |
| 99.9875229 | 100.13371  | 99.8775479 | 100.035049 |
| 100.133182 | 100.043483 | 99.8046128 | 100.122455 |
| 100.009523 | 99.8550545 | 99.9156922 | 99.9709317 |
| 100.003668 | 99.8964931 | 100.224828 | 99.9244971 |

99.9541686 99.8720991 99.8884463 99.9745257  
99.7173171 99.7854689 99.7260189 99.9646062  
99.9185078 99.8494251 99.783864 99.8720246  
99.7043656 99.7011843 100.018388 100.071133  
99.7625584 99.6072046 100.201355 99.8162455  
100.037554 100.055836 100.121923 99.8066136  
99.9374914 99.8871108 99.8062895 99.811789  
99.7517359 99.8245619 99.8471583 99.7210762  
99.9979905 100.048331 99.8037745 99.950949  
99.8486055 99.8356644 99.9882082 99.9009204  
99.6571728 99.7604493 100.194019 99.5528766  
99.8313961 100.020965 100.045425 99.8234336  
99.8716697 99.85568 99.8526075 100.043243  
100.05299 99.9856253 99.8029361 100.159114  
100.06807 100.259746 99.9387464 100.176653  
100.033474 100.043639 99.8999734 99.9348478  
99.9850391 99.9337097 99.9848548 99.8536232  
99.8587183 100.051927 100.055694 100.051869  
100.070909 99.9434048 100.080844 100.001696  
100.030635 99.8800741 99.8243137 100.111961  
99.8491378 99.9222945 99.9731181 100.191029  
100.163698 100.097431 100.064706 100.111961  
99.9509751 100.092897 99.9546748 99.9847327  
99.8746858 99.8605275 99.5262856 99.7065564  
99.9499106 99.9102539 99.5264952 99.8299028  
99.7591874 99.8428575 99.6547604 99.8392472  
99.9101692 100.080387 100.06764 99.8968951  
99.9534589 100.191411 100.090485 100.060638  
99.8122351 100.06084 100.03264 99.9830075  
100.069844 100.266626 99.8781767 100.066389  
100.2336 100.257557 100.298811 100.044681  
100.203262 100.242858 100.203451 100.19376  
100.100892 100.188284 99.8232658 100.099453  
99.8888792 100.086954 99.9846452 99.8199833  
100.13194 100.097431 99.8674879 99.8812252  
100.000652 100.074601 100.069107 99.8730309  
99.8546377 99.8011061 99.9341356 99.6730603  
99.9179755 99.7673297 100.075185 99.6169937  
99.6694145 99.8314423 99.732516 99.8475853  
99.6686273 99.9793096 100.00591 99.9879525  
100.100782 100.22987 99.7624205 100.221793  
99.8705125 100.280672 99.8375017 100.23865  
99.8987196 100.431353 99.6942601 100.168772  
100.086767 100.522608 99.8565866 100.20897  
99.9489248 100.479489 100.153556 100.135346  
100.075413 100.274713 100.030867 100.128574

|            |            |            |            |
|------------|------------|------------|------------|
| 99.9569079 | 100.309993 | 100.047436 | 100.060857 |
| 99.7979545 | 100.09283  | 100.017026 | 100.050771 |
| 99.73267   | 100.089851 | 100.313366 | 100.026422 |
| 99.7780853 | 99.9192567 | 100.298895 | 100.114454 |
| 99.8071794 | 99.8662596 | 99.9654334 | 100.379992 |
| 99.8479822 | 99.699115  | 99.7743747 | 100.213148 |
| 99.8433697 | 99.5689742 | 99.9390082 | 100.22698  |
| 100.237205 | 100.045948 | 100.182288 | 100.374373 |
| 99.8006155 | 99.7933494 | 100.173899 | 100.257669 |
| 99.7631834 | 99.5616048 | 99.4211993 | 100.028007 |
| 99.4378255 | 99.3886587 | 100.054147 | 99.7062777 |
| 99.8353866 | 99.7303174 | 99.9824211 | 99.9679255 |
| 99.9757127 | 99.8722178 | 100.166978 | 100.15422  |
| 100.071688 | 99.9829159 | 100.058551 | 100.271068 |
| 100.080203 | 99.8621829 | 100.07428  | 100.255796 |
| 100.038691 | 100.06837  | 100.382784 | 100.017345 |
| 100.093331 | 100.078875 | 100.134261 | 100.17223  |
| 100.414964 | 100.07668  | 100.270372 | 100.197011 |
| 100.058383 | 100.123876 | 100.14328  | 100.231014 |
| 100.376822 | 100.161977 | 100.330353 | 100.339218 |
| 100.147084 | 99.8115378 | 100.313785 | 100.081028 |
| 100.019354 | 99.995146  | 100.136359 | 100.144711 |
| 100.019354 | 99.8612421 | 99.6642696 | 100.363423 |
| 99.8117919 | 99.5689742 | 99.7479495 | 100.302189 |
| 100.034256 | 99.8231407 | 100.123356 | 100.411978 |
| 100.175114 | 100.090321 | 100.305396 | 100.19874  |
| 100.031417 | 100.082952 | 100.093575 | 100.066332 |
| 100.147794 | 100.312188 | 100.046387 | 100.251041 |
| 99.9466185 | 100.034972 | 100.179562 | 99.959713  |
| 100.045432 | 99.9982819 | 100.141392 | 99.9994789 |
| 100.026628 | 99.9586125 | 100.100706 | 99.9721038 |
| 100.177953 | 100.021958 | 99.9325068 | 100.049618 |
| 100.08109  | 99.882096  | 100.1502   | 99.9280156 |
| 100.10025  | 100.018822 | 99.8194654 | 100.026566 |
| 100.070269 | 99.9694314 | 100.168656 | 99.9765703 |
| 99.989905  | 99.9063994 | 100.135729 | 99.8904109 |
| 100.131828 | 99.9909125 | 100.029399 | 99.8277364 |
| 100.392433 | 100.288982 | 99.7542412 | 100.052644 |
| 100.338148 | 100.222814 | 99.4530774 | 99.808718  |
| 100.120651 | 100.325202 | 99.6170816 | 99.866926  |
| 100.183275 | 100.243197 | 99.5753465 | 99.9291682 |
| 100.125796 | 100.415203 | 99.6273581 | 99.9891052 |
| 100.265235 | 100.353425 | 99.7691316 | 99.9138958 |
| 100.188774 | 100.320341 | 99.685242  | 99.9749854 |
| 100.195693 | 100.306857 | 99.6441361 | 99.8480516 |
| 100.102379 | 100.304661 | 99.9838892 | 99.817795  |

100.220352 100.36691 99.8341461 99.8994879  
100.03603 100.085931 99.9887128 99.7600192  
99.6225024 99.8389771 100.049113 99.5506721  
99.5329137 99.6757523 100.117274 99.7950305  
99.5504767 99.7215368 100.214376 99.9056833  
99.9459089 100.005024 100.161106 99.987088  
99.9091864 99.8179664 99.9750808 99.9294564  
99.8941071 99.8214159 99.8660242 99.7816311  
100.052528 100.002515 100.144118 99.861451  
100.051287 100.056924 100.095253 99.9875203  
99.6817552 99.6561528 100.514282 99.819668  
99.9711002 99.9125144 100.094204 100.035066  
99.9964689 99.8504232 100.335387 100.23721  
100.115507 99.8377227 100.308332 100.113157  
100.322891 100.067115 99.8972731 100.203351  
99.7009148 99.6867281 100.109304 99.6803434  
99.9499892 99.7754747 100.407322 100.041118  
100.331761 99.9286644 100.189419 99.9559669  
99.8710447 99.7833145 100.316512 99.7763002  
99.8811567 99.6738708 100.057083 99.6637743  
99.9322489 99.6925295 99.6028204 99.7568495  
99.7651348 99.57603 100.079523 99.8117436  
99.9042191 99.7958581 100.001716 99.9118787  
99.9608108 99.907497 100.046597 99.9405505  
99.9519407 99.9656683 100.076168 99.7873943  
99.8087761 100.051122 100.174319 99.8529503  
99.7417176 99.9010683 100.605931 99.6173808  
100.031063 100.089224 99.7712289 100.041262  
100.100073 99.8852319 99.9044037 100.065179  
99.9883084 99.8381931 99.8412768 99.9831979  
99.8823985 99.5697582 99.5910758 99.6830809  
99.774892 99.8077747 99.5468241 99.8242785  
100.051819 100.01255 100.230105 99.6725631  
99.9879536 100.080129 99.9002092 99.8914194  
100.005694 100.032777 99.871477 99.8643326  
100.036385 100.010669 99.9872448 99.9468899  
100.195161 100.18628 99.9769683 100.035499  
100.034256 100.2098 100.02877 99.9803163  
100.199064 100.382432 99.9952143 100.09241  
99.9934531 100.257936 99.9392179 100.036363  
100.162519 100.365185 99.6472819 100.083621  
99.9400546 100.467886 99.530885 100.001928  
100.046851 100.421004 99.8523921 99.9807486  
99.8854144 100.518218 99.8257572 100.2277  
100.261864 100.656826 99.7043269 100.171654  
99.9542469 100.209329 99.7678733 99.9515005



99.8737057 99.8684547 99.8666534 99.9790196  
99.7757303 99.7827872 99.8316236 99.9457296  
99.7754538 99.798335 99.6716616 99.9514548  
99.8972458 99.8867191 99.6795187 100.004047  
99.9208853 99.6788553 100.196273 100.041061  
100.074611 99.9148732 100.368322 99.9413358  
99.9996838 99.8365741 100.261345 99.902724  
99.8321334 99.8643079 99.8501583 100.038931  
99.7034292 99.9288802 100.168068 100.157828  
99.6867018 100.077915 99.666625 100.305618  
100.027747 100.110691 99.6358011 100.113225  
99.9562755 99.7890903 99.8862203 100.04612  
100.062723 99.9033875 99.5556186 100.021755  
99.9175675 99.9080098 99.9003227 99.9936615  
100.215758 100.06895 100.318964 99.9943272  
99.9056786 99.9057687 100.27444 100.08846  
100.007978 99.8474995 100.112665 100.057171  
100.080141 99.7260588 99.7224304 100.167947  
100.261239 99.8928822 99.7318992 100.05584  
99.790937 99.8427372 99.9053593 100.038265  
99.9253091 99.8413365 99.6823392 100.09565  
99.9637406 99.8007162 99.7302875 100.047452  
99.936645 99.7459488 99.7145733 100.149973  
99.7760067 99.7105111 99.7508368 100.047319  
99.8532845 99.8320918 99.8463305 100.082069  
99.961114 99.876494 99.8999198 100.050381  
100.210228 100.163918 100.028655 100.039064  
99.9413453 99.8486201 99.7941514 99.9446644  
100.154792 99.8047782 100.189221 100.022953  
100.362572 99.7868492 100.33488 100.182593  
100.097283 99.6357137 100.753722 100.158361  
100.167925 99.8676696 100.629621 100.117885  
100.336167 100.419685 100.356436 100.134661  
99.9539254 100.006199 100.422315 99.875962  
100.065211 100.215744 99.9688203 99.9428004  
99.9983014 99.9658587 100.119515 99.8035316  
100.015305 100.371641 99.8151036 99.8891433  
99.6536617 100.003538 100.028051 99.9157722  
99.8480313 100.213643 99.8557993 99.9258911  
100.098389 100.105929 100.023417 100.072749  
100.007287 100.066709 99.6235118 100.000718  
99.9797768 100.042617 100.069351 99.8940697  
100.025812 100.203838 99.9962193 100.049316  
99.9703763 99.9179547 100.217426 99.9832762  
100.088574 100.150191 100.44508 99.9037892  
99.8915778 99.9947131 100.878025 99.8951348

|            |            |            |            |
|------------|------------|------------|------------|
| 100.227785 | 100.066429 | 100.046787 | 99.9594434 |
| 100.187279 | 100.140106 | 100.135229 | 99.9931289 |
| 100.090648 | 100.080996 | 100.032281 | 100.000851 |
| 100.099633 | 100.129601 | 99.970432  | 100.074214 |
| 100.025397 | 100.241236 | 99.9033447 | 99.9647692 |
| 100.101845 | 100.361837 | 99.9009271 | 99.9059195 |
| 99.977012  | 100.201877 | 99.8894437 | 100.016296 |
| 99.9398246 | 100.235073 | 99.8042246 | 99.984874  |
| 99.6688685 | 99.9073094 | 99.7881075 | 99.9818117 |
| 99.8362807 | 100.316314 | 99.9921901 | 100.123876 |
| 99.853561  | 99.8361539 | 100.057867 | 100.010837 |
| 100.114011 | 100.214343 | 99.7921368 | 100.047452 |
| 99.7469757 | 99.9923319 | 99.8360558 | 99.9527862 |
| 100.208984 | 100.224428 | 99.6936211 | 100.119216 |
| 100.061202 | 99.9151533 | 100.299422 | 99.8304267 |
| 100.167787 | 100.180726 | 100.411637 | 99.9768853 |
| 100.124241 | 100.149631 | 100.510959 | 100.058236 |
| 99.9356773 | 99.9783249 | 99.9645896 | 99.9742224 |
| 99.859229  | 99.770461  | 99.653127  | 99.9981884 |
| 100.221564 | 100.158875 | 99.7623202 | 99.9358769 |
| 99.9323595 | 99.8358737 | 99.9277217 | 99.8422766 |
| 99.9723117 | 99.9668392 | 99.7401592 | 100.059035 |
| 99.7833336 | 99.8353134 | 100.248049 | 99.9617069 |
| 99.7891398 | 99.8776146 | 99.7609099 | 100.056772 |
| 99.8722238 | 99.9340628 | 99.9607618 | 99.9898003 |
| 99.8447135 | 100.047379 | 99.8666783 | 99.9384067 |
| 100.155345 | 100.28872  | 99.6607826 | 99.9206985 |
| 99.9753531 | 100.193472 | 99.8175212 | 99.9567806 |
| 100.109863 | 100.370381 | 100.523248 | 99.984874  |
| 100.024568 | 100.016284 | 100.413853 | 99.9148401 |
| 100.373907 | 100.207199 | 99.7919353 | 100.092188 |
| 100.033968 | 99.8759337 | 99.7675582 | 99.9518542 |
| 100.224882 | 100.245298 | 99.8688944 | 99.9342792 |
| 99.8972458 | 100.02917  | 99.8862203 | 99.976619  |
| 100.164193 | 100.200336 | 99.8555978 | 100.073814 |
| 99.9529577 | 99.9560538 | 99.9555237 | 100.027214 |
| 100.001481 | 99.9580148 | 99.8171183 | 100.07195  |
| 99.7158711 | 100.004238 | 99.9406154 | 99.7466791 |
| 100.157557 | 100.326119 | 100.19184  | 99.968231  |
| 100.000375 | 100.110131 | 100.664877 | 99.9807465 |
| 100.063829 | 100.025949 | 100.181163 | 99.9880694 |
| 99.8073879 | 99.8115015 | 99.8529788 | 99.9104464 |
| 99.9598698 | 99.996534  | 99.6239147 | 100.030276 |
| 99.8279861 | 99.770321  | 100.119918 | 99.8621151 |
| 99.7413078 | 99.6358538 | 99.6841523 | 99.9603754 |
| 99.9203324 | 99.7609363 | 99.7145733 | 99.9634378 |

100.037424 99.8220068 100.47812 99.9570468  
100.155898 100.018245 100.326418 100.007642  
100.026365 100.038135 100.066933 100.063695  
100.112767 100.135764 99.8316236 100.052511  
99.9800533 99.7610763 99.8302134 99.9221631  
99.9290417 99.7486101 99.986952 99.9491913  
99.9648466 99.5948132 99.9255056 99.8788912  
100.101431 99.8910613 99.8529788 99.8177781  
100.15344 100.424298 100.407201 100.0413  
99.9756238 100.31334 100.289474 99.8353201  
100.307078 100.566296 100.356488 100.073143  
100.267978 100.478653 100.047381 99.9837426  
100.389423 100.588768 99.6821266 100.122572  
100.178724 100.26053 99.696616 99.9147275  
100.228325 100.361937 100.016389 99.9026032  
100.022185 100.377948 100.057443 99.8383845  
99.9196676 100.311655 99.7189539 99.9718848  
99.8706196 100.131313 99.8791424 99.9909372  
99.9669195 100.197747 99.5277741 100.004394  
100.005605 100.378089 99.7783202 99.9841423  
100.140176 100.755907 99.858012 100.09859  
99.7772211 100.513205 100.240371 100.00546  
99.8793239 100.380477 100.399554 99.9173921  
100.054377 100.332161 100.175572 99.9814776  
99.9077856 100.259125 99.7759053 99.8639654  
100.010027 100.396348 99.8173611 100.007725  
99.7556676 99.9724606 99.6903775 100.047029  
99.8026432 100.354493 99.216453 99.988539  
99.7613323 100.201961 99.7954258 99.9472365  
99.9706499 100.376965 100.256471 99.8760897  
100.054101 100.12106 100.265124 100.039168  
100.236338 99.8855203 100.104131 100.204644  
100.150262 99.7527922 99.9399174 100.03224  
100.341757 99.6244182 99.9284466 99.9781468  
99.9289246 99.4886001 100.008742 99.8423815  
99.8956272 99.5567198 99.7006409 99.9100643  
100.067088 99.6773689 99.9067125 99.9746827  
99.9770054 99.6925379 99.8928268 99.8338545  
99.9548993 99.8602387 99.8892045 99.7918859  
99.966505 99.7054595 100.133713 99.8898127  
100.156894 99.7933831 100.68572 99.9436392  
100.000079 99.6984369 100.925801 99.8161344  
100.244628 99.8067261 99.9749335 100.052491  
100.150677 99.7433818 99.9006753 100.043431  
99.8997721 99.7085495 99.981172 99.9945345  
100.067779 100.123026 99.7696668 100.078605

|            |            |            |            |
|------------|------------|------------|------------|
| 100.01652  | 99.9209144 | 99.7187526 | 100.212105 |
| 99.9379052 | 99.74591   | 100.133512 | 100.157346 |
| 100.102596 | 99.9636121 | 99.6151131 | 100.222498 |
| 100.235647 | 99.9011105 | 99.6006237 | 100.160544 |
| 100.051476 | 99.8692277 | 99.8346679 | 100.025178 |
| 99.8038866 | 99.992405  | 99.7221737 | 100.034238 |
| 100.045396 | 100.036788 | 100.435174 | 100.175066 |
| 99.9912363 | 99.9883318 | 100.336163 | 100.043831 |
| 99.9759001 | 100.054626 | 100.254861 | 100.048894 |
| 100.107294 | 99.9954949 | 100.30497  | 100.087931 |
| 100.060042 | 99.8947902 | 100.561553 | 100.001862 |
| 100.107846 | 99.9869273 | 100.249427 | 100.183993 |
| 99.9287864 | 99.9335552 | 100.191872 | 99.9300494 |
| 99.9082    | 99.9279371 | 99.734047  | 100.05902  |
| 100.131196 | 99.8838348 | 99.8551946 | 100.128967 |
| 100.001599 | 99.6602337 | 99.9960639 | 100.026244 |
| 100.046225 | 99.9247066 | 99.8670679 | 99.9526991 |
| 100.051752 | 99.7273702 | 100.040538 | 100.053957 |
| 99.8322101 | 99.7397301 | 100.020615 | 99.9966663 |
| 99.8649549 | 99.8766717 | 100.058248 | 99.9558967 |
| 100.173059 | 100.182438 | 99.7308271 | 99.9892052 |
| 99.9399776 | 99.9976017 | 100.397139 | 100.02358  |
| 100.15344  | 99.9502691 | 100.144379 | 99.9496347 |
| 99.996901  | 99.7480168 | 100.164302 | 99.8309234 |
| 100.41678  | 100.203225 | 99.9153659 | 99.949768  |
| 100.181764 | 100.05589  | 99.7690631 | 100.047029 |
| 100.101076 | 100.041985 | 99.9316665 | 99.9999971 |
| 99.9160754 | 99.8506879 | 100.323484 | 99.8565043 |
| 99.868409  | 99.7773715 | 99.9487721 | 99.8928771 |
| 100.304729 | 100.063053 | 100.275589 | 99.8510417 |
| 100.29561  | 99.9557467 | 100.63722  | 99.8908786 |
| 100.282485 | 100.027799 | 100.020213 | 100.044231 |
| 100.141005 | 99.8043384 | 99.7626233 | 99.9590943 |
| 100.217548 | 100.006591 | 99.8757213 | 99.9204565 |
| 99.8702051 | 99.8852393 | 99.7950233 | 99.8210641 |
| 99.8834688 | 100.043951 | 99.7167402 | 100.063017 |
| 100.052443 | 100.314183 | 99.7547749 | 100.182661 |
| 99.9913744 | 100.238338 | 100.055631 | 100.133897 |
| 100.153716 | 100.383567 | 100.095075 | 100.163742 |
| 99.8689616 | 100.267271 | 100.046173 | 100.020648 |
| 99.9495109 | 100.098868 | 99.7684594 | 100.096059 |
| 99.8779423 | 99.8887507 | 100.309397 | 100.079138 |
| 100.029093 | 99.9810283 | 99.9690975 | 100.120973 |
| 99.8746263 | 99.8273727 | 99.9479671 | 100.011322 |
| 99.8480989 | 99.9039196 | 100.046173 | 100.138294 |
| 99.9348656 | 99.8341145 | 99.9630602 | 100.151617 |

|            |            |            |            |
|------------|------------|------------|------------|
| 99.9641562 | 99.9100995 | 99.9940515 | 99.978813  |
| 99.9296154 | 99.9140322 | 100.144178 | 99.9832097 |
| 99.8065117 | 99.902796  | 100.326905 | 99.9588279 |
| 99.8881663 | 100.086087 | 100.757563 | 99.9279176 |
| 99.8335918 | 100.099851 | 100.377216 | 99.9383099 |
| 100.039593 | 100.138617 | 100.278607 | 99.8950089 |
| 99.9607022 | 99.9995681 | 100.236347 | 100.002928 |
| 100.057831 | 100.320784 | 100.039935 | 99.9128622 |
| 100.031718 | 100.131453 | 100.041343 | 99.8427812 |
| 100.022461 | 100.205332 | 99.9427348 | 99.978813  |
| 99.8432632 | 99.850407  | 99.7517563 | 99.9718848 |
| 99.9164899 | 100.067688 | 99.6310112 | 99.8201314 |
| 99.8135581 | 99.936926  | 99.605856  | 99.9491018 |
| 99.8932784 | 99.9199312 | 99.4901419 | 99.9896049 |
| 99.723061  | 99.8678232 | 99.6515379 | 100.158812 |
| 99.8156305 | 100.11474  | 99.641677  | 100.097391 |
| 99.7561404 | 99.9093007 | 99.8638915 | 100.089111 |
| 100.064793 | 100.177824 | 100.008895 | 100.066584 |
| 99.7787989 | 99.7949401 | 100.309174 | 100.1327   |
| 99.8600379 | 99.9248571 | 100.52386  | 100.348644 |
| 100.051806 | 100.321195 | 99.5180978 | 100.309321 |
| 100.061478 | 100.299472 | 99.6095307 | 100.328649 |
| 100.068386 | 100.061501 | 99.8036747 | 100.232807 |
| 100.29428  | 100.130734 | 99.5392442 | 100.375437 |
| 100.214284 | 99.9690037 | 100.043334 | 100.163625 |
| 100.070182 | 99.9290616 | 99.9968116 | 100.082046 |
| 99.8998285 | 99.8341815 | 100.123891 | 100.220944 |
| 100.011463 | 99.9073387 | 99.9164554 | 100.136299 |
| 99.9287042 | 99.9394325 | 99.9116219 | 100.198416 |
| 99.9713962 | 99.980636  | 99.6810256 | 100.254535 |
| 99.9570274 | 100.020858 | 99.80589   | 100.05432  |
| 100.049181 | 99.9499436 | 99.831467  | 100.034325 |
| 100.186514 | 99.9858215 | 99.9243097 | 100.131633 |
| 100.017957 | 100.067388 | 100.334952 | 100.099375 |
| 100.258634 | 100.257148 | 100.438066 | 100.111105 |
| 100.240949 | 100.251682 | 100.72465  | 99.9728744 |
| 100.254075 | 100.447749 | 100.756067 | 99.9355507 |
| 100.045865 | 100.090792 | 100.815479 | 99.9095574 |
| 100.019753 | 100.244534 | 100.106974 | 99.9596778 |
| 99.9262173 | 100.020298 | 100.105363 | 99.9710082 |
| 99.8882229 | 100.109852 | 99.7416453 | 99.9580782 |
| 100.057609 | 100.145029 | 99.7420481 | 99.9758069 |
| 100.075708 | 99.8075534 | 100.040313 | 99.8350433 |
| 100.167586 | 99.9584926 | 100.052598 | 99.9254199 |
| 100.100992 | 99.805311  | 100.173636 | 99.9959351 |
| 100.342636 | 99.8567453 | 100.044945 | 100.056053 |

100.258911 99.8458138 100.196393 99.9420823  
100.103341 99.8585672 100.076362 99.861703  
99.7739632 99.6368533 99.8912811 99.9159557  
99.9830018 99.8615103 99.7368118 99.8879629  
99.9567511 99.7037038 99.7285546 99.8489063  
100.14921 99.932285 99.7519164 99.9246201  
100.154875 99.9352281 100.448941 99.8151817  
99.9870084 99.9447581 100.186726 100.010731  
100.197429 100.020438 100.036083 100.165758  
100.025141 99.8809909 99.8469744 100.002067  
100.095465 99.9254177 99.9921795 99.9466145  
99.9133683 99.9603146 99.9486784 99.9150226  
99.8760647 100.05043 99.9049759 99.9199547  
99.913092 99.9540079 99.9899642 99.9236871  
100.080958 100.086027 99.5106462 100.044189  
100.079991 100.002779 99.7519164 100.008465  
99.8938875 100.042301 99.88101 99.95088  
100.117847 100.063183 99.9802973 100.039124  
100.063274 100.112375 100.001645 100.074448  
100.054293 100.221971 100.397183 100.008199  
99.7801805 100.091353 100.301521 99.9503468  
99.9979232 100.248038 100.348647 99.9863376  
100.006351 100.100883 100.103148 100.106173  
100.250206 100.320775 100.074953 100.090844  
99.990048 100.070751 100.155913 100.010198  
100.099886 100.143488 99.8826211 100.123236  
99.8148591 99.9869426 99.9132331 99.9530128  
100.029148 100.270602 99.5903983 100.115638  
99.8839399 100.101023 99.9061843 100.046322  
100.08082 100.330865 99.7396313 100.139631  
99.8916769 100.025904 100.026014 100.031659  
100.011049 100.146711 99.9599565 100.017663  
99.8137538 99.9299025 99.9446505 99.8566377  
99.8654262 99.9093007 99.6012736 100.078447  
99.8666697 100.020298 99.7724586 100.229208  
99.8469126 100.080001 99.5269591 100.128967  
99.7178696 99.7287903 99.756347 100.01433  
99.7091654 99.7157566 100.076564 99.9220875  
99.8281226 99.7922773 99.9237055 100.014464  
99.8462218 99.7139346 99.7015678 99.9315517  
100.137052 99.8456736 99.9394143 100.01673  
100.029839 99.7585016 100.58307 99.939283  
100.087728 99.9119635 100.511172 99.9743407  
100.005937 99.8434312 100.526881 100.057919  
100.087037 100.071452 100.607237 99.9634101  
100.14396 100.105508 100.284201 100.078714

99.8109905 99.9104219 100.130537 99.8834308  
99.8831109 99.9719468 100.309174 99.978073  
99.8800714 100.097379 99.8238141 100.01673  
99.9821728 100.112235 99.9895614 100.096176  
99.9737449 100.213001 99.88101 100.060052  
100.193422 100.206975 99.7913896 100.167757  
99.8927822 100.1547 99.7329853 100.039391  
100.051392 100.356372 99.8290503 99.9863376  
99.9539878 100.156241 99.6818312 100.046189  
99.7504758 99.9224746 99.7023734 99.9414158  
99.9176513 99.8184849 99.7134501 100.025661  
99.7933059 99.9118234 99.586169 99.9242203  
99.7314095 99.6672654 99.7215059 99.895561  
99.9112959 99.9589131 99.5901969 99.7285374  
99.8554786 99.9088803 100.177261 99.8910288  
99.8890519 99.9031342 100.581862 99.9306186  
99.9816201 99.961716 100.370599 99.8307777  
99.9749884 99.9865222 99.8522106 99.9387498  
100.054984 100.023661 99.7158668 100.027394  
100.073221 100.046786 99.6304757 100.052454  
99.8565839 100.040059 99.9823112 99.6808164  
99.9744357 99.841329 99.9700262 99.8218467  
99.9637973 99.8386662 99.6514207 99.8763659  
100.000825 99.9001911 100.197803 99.7627952  
100.102097 100.016654 100.716393 99.8250458  
99.976875 100.082036 100.545188 99.6289494  
100.120345 100.172886 100.088425 99.6865798  
100.083717 100.099561 100.10071 99.7581852  
100.049577 100.09157 99.7839166 99.7617788  
100.160843 100.174148 100.015722 99.7777502  
99.8343728 100.249015 99.9097881 99.7877324  
99.7015457 100.112039 99.8229871 99.86373  
100.04709 100.132368 100.000818 99.9812533  
100.127532 100.092832 99.9369764 100.040481  
100.147159 100.235415 99.9623521 100.038884  
100.224146 100.385429 99.8654813 99.9715374  
99.8541379 100.212983 100.181469 99.9761957  
100.095327 100.151015 100.298278 100.035423  
100.093392 100.003104 100.400989 100.207915  
100.259668 99.7507438 100.724429 100.094518  
100.22 99.6416682 100.589696 100.039549  
100.216959 99.668867 100.383871 99.9773936  
100.122418 99.5219375 100.378634 100.018653  
99.9951197 99.5855882 100.249742 99.9281482  
99.9380359 99.3967389 100.168983 100.056452  
100.039349 99.7250872 100.185094 99.9015291

|            |            |            |            |
|------------|------------|------------|------------|
| 100.138866 | 99.6032534 | 100.045528 | 100.067632 |
| 100.025942 | 99.736864  | 99.7968058 | 100.107295 |
| 99.9689966 | 99.6605952 | 100.183685 | 100.03742  |
| 100.29671  | 100.016283 | 99.8415154 | 100.060046 |
| 100.182543 | 99.7759798 | 99.9955822 | 100.035689 |
| 99.980054  | 99.7315364 | 99.9768525 | 99.9079177 |
| 100.037553 | 99.8652872 | 99.8211746 | 100.068431 |
| 99.9446704 | 99.7686894 | 99.7571311 | 100.078812 |
| 100.075839 | 99.9395932 | 99.716248  | 100.081607 |
| 100.045154 | 99.8512672 | 99.920462  | 100.095982 |
| 100.105832 | 100.121433 | 99.9629563 | 100.196602 |
| 99.9170268 | 99.8724374 | 99.7543116 | 100.216433 |
| 100.034235 | 99.8982342 | 99.6379056 | 100.136842 |
| 99.9949815 | 99.9446404 | 100.043313 | 99.8529492 |
| 100.271831 | 100.150454 | 100.339564 | 100.029833 |
| 99.9369302 | 99.7238254 | 100.168983 | 100.125795 |
| 100.179087 | 100.044182 | 99.5666119 | 100.129788 |
| 100.022901 | 99.9729608 | 99.7180606 | 100.062841 |
| 100.129329 | 100.181859 | 100.005048 | 99.9908362 |
| 99.8303645 | 99.8010756 | 100.146427 | 99.8393735 |
| 99.8063146 | 99.7765406 | 99.9808804 | 99.738487  |
| 100.219447 | 99.8948694 | 99.8473558 | 99.9707388 |
| 100.08662  | 100.027499 | 99.7216857 | 100.036355 |
| 99.8627074 | 99.9073472 | 99.8139244 | 100.033294 |
| 99.924767  | 100.062268 | 99.6930877 | 99.9820519 |
| 100.003689 | 99.9136562 | 99.9975961 | 99.8771726 |
| 100.101547 | 99.9551554 | 99.8302373 | 99.8546795 |
| 100.078741 | 99.869353  | 99.9780609 | 99.9330728 |
| 99.9778426 | 99.9855788 | 100.049757 | 99.8734459 |
| 99.9843388 | 99.9006176 | 100.128503 | 99.9583609 |
| 100.129053 | 99.9868406 | 100.31439  | 99.9204287 |
| 100.164298 | 99.9833356 | 100.15408  | 99.8951405 |
| 100.09049  | 99.9841768 | 100.054994 | 99.8071644 |
| 100.039902 | 99.928237  | 100.477721 | 99.9007305 |
| 100.200649 | 100.008151 | 100.443484 | 99.9301447 |
| 99.924767  | 99.7455564 | 100.713352 | 99.8167472 |
| 100.224699 | 99.8219654 | 100.357488 | 99.9719367 |
| 100.046813 | 99.830097  | 100.18308  | 99.9377311 |
| 99.8938063 | 99.9735216 | 99.8676967 | 99.9037917 |
| 99.9026522 | 99.9279566 | 100.232019 | 99.919497  |
| 99.9626386 | 99.9930094 | 99.7867361 | 100.061244 |
| 99.7547595 | 99.866549  | 99.9504698 | 99.9976241 |
| 99.8931152 | 100.00058  | 100.092654 | 99.9666128 |
| 100.064781 | 99.9208064 | 99.8644744 | 100.069895 |
| 100.075839 | 99.9824944 | 99.5907793 | 100.043276 |
| 100.043358 | 99.949968  | 99.9649702 | 99.8910146 |



99.9235231 99.6713906 100.205234 99.9574292  
100.189177 99.9993184 100.45738 100.016391  
100.047366 99.9749236 100.342988 100.053524  
100.11454 100.136294 100.278541 100.284046  
99.9052784 99.9980566 100.580835 100.17371  
100.15172 100.335238 99.9714148 100.096514  
99.664227 99.9700166 100.302709 99.8770395  
99.8909037 100.136154 99.7645827 99.8828957  
99.8982293 100.013338 99.6373014 100.106896  
99.7660933 99.947865 99.9601367 99.8452297  
99.7691341 100.283504 99.9075728 99.8890181  
99.9753546 100.73677 99.5672161 100.067499  
99.7649876 100.657417 99.6955044 100.035423  
99.9560042 100.795093 99.6711357 100.056719  
99.6041024 100.345052 99.8511823 99.7640414  
99.8642278 100.344771 99.4675258 99.9119106  
99.6709997 100.325283 99.9436224 99.7048139  
99.9177179 100.315329 100.083592 99.8433663  
99.8805374 100.047547 100.31298 100.001085  
99.8350639 99.6202176 99.8813915 100.030499  
100.122418 99.8051414 99.9436224 100.016524  
99.9376213 99.6312934 99.8022435 100.124863  
99.9572481 99.8033188 99.6143424 100.161731  
99.8946356 100.076849 99.7347763 100.024643  
99.8736265 100.473335 99.8427238 100.055121  
99.7145382 100.375335 99.8304387 100.204588  
99.7528244 100.261913 99.8902529 100.001883  
99.8531704 99.9607634 100.085807 99.9643502  
99.9947051 100.034088 99.9083784 100.128324  
99.9847534 100.075026 99.579904 100.221225  
100.009771 100.24579 99.5935988 99.9164358  
100.158355 100.468708 99.7927779 100.080543  
100.298784 100.662464 99.8608493 99.9572961  
99.8295697 99.4836364 100.001231 100.103655  
99.9659443 99.646722 99.8556583 100.221906  
99.9409107 99.6605716 100.138324 100.106936  
100.178584 99.8835777 100.334423 100.235713  
99.9186425 99.63047 100.120481 100.015206  
99.8535844 99.8010457 100.18514 100.095863  
99.8464527 99.5736585 99.844175 100.053621  
99.9493523 99.8291687 99.9897477 100.179937  
99.8601339 99.6813459 99.914488 100.217258  
100.132446 100.10079 99.8183818 100.250478  
100.069863 99.7806953 100.080554 100.095043  
100.20158 99.9778395 100.32718 100.071393  
100.114108 99.9970593 100.001231 100.111858

|            |            |            |            |
|------------|------------|------------|------------|
| 100.164612 | 99.8974273 | 99.9872744 | 100.059226 |
| 99.9780244 | 99.7640193 | 99.9625412 | 100.135918 |
| 100.09999  | 99.9728932 | 99.7768653 | 100.191011 |
| 99.8895337 | 99.7842283 | 99.8498283 | 100.27112  |
| 99.8397577 | 99.7059359 | 99.7459487 | 100.168591 |
| 99.9986917 | 99.8444315 | 100.156344 | 100.209329 |
| 99.6148924 | 99.4645579 | 100.158287 | 100.057722 |
| 99.7444265 | 99.805144  | 99.9445213 | 100.089848 |
| 99.558858  | 99.5958461 | 99.7441821 | 99.9773388 |
| 99.7061484 | 99.9036454 | 99.9899244 | 100.10967  |
| 99.4354368 | 99.684455  | 99.8858682 | 99.9823969 |
| 99.5668629 | 99.9521189 | 99.8729715 | 99.9252537 |
| 99.543867  | 99.8800447 | 100.098574 | 99.7772009 |
| 99.6065964 | 99.8387786 | 100.128077 | 100.130723 |
| 99.5606046 | 99.8784901 | 100.238847 | 100.092309 |
| 99.968273  | 99.9138206 | 100.081791 | 100.358202 |
| 99.8885149 | 99.8803273 | 99.8070751 | 100.089711 |
| 100.096643 | 100.358561 | 100.171714 | 100.31596  |
| 99.9889402 | 99.9237132 | 99.8623716 | 100.068522 |
| 100.131864 | 100.177528 | 99.8035418 | 100.00632  |
| 100.510133 | 100.326481 | 99.8337517 | 100.046375 |
| 100.172908 | 100.035075 | 99.7464787 | 99.9335928 |
| 100.337081 | 100.032672 | 99.7318154 | 100.080689 |
| 99.9224267 | 99.7024029 | 99.7512487 | 99.8608651 |
| 100.127207 | 100.243384 | 99.5858894 | 100.021221 |
| 100.285995 | 100.207912 | 99.5666328 | 99.9721439 |
| 100.136813 | 100.135696 | 99.8332217 | 99.9439825 |
| 100.400975 | 100.416644 | 99.9007081 | 100.079185 |
| 100.233891 | 100.064753 | 100.276123 | 99.8809609 |
| 100.395153 | 100.321817 | 100.213937 | 100.097504 |
| 99.9291217 | 99.9922544 | 100.260047 | 99.992103  |
| 100.207838 | 100.47176  | 99.931448  | 100.170094 |
| 100.283812 | 100.184594 | 99.7166222 | 100.030244 |
| 100.037406 | 100.177104 | 99.9761445 | 99.7802084 |
| 100.117601 | 100.115346 | 99.7171522 | 99.9357801 |
| 99.9329058 | 99.9104289 | 99.6268759 | 99.9162311 |
| 100.114399 | 100.357289 | 99.7629087 | 100.055535 |
| 99.8352459 | 99.7146979 | 100.056174 | 99.8519792 |
| 100.027509 | 100.029139 | 100.220827 | 99.7826692 |
| 100.242041 | 100.120433 | 100.028084 | 99.9643517 |
| 99.9231544 | 99.7830978 | 99.8653749 | 99.8193064 |
| 100.160682 | 100.202683 | 99.8392283 | 100.062233 |
| 100.019068 | 99.9399652 | 99.7134422 | 99.9955207 |
| 100.07845  | 100.330721 | 99.6952456 | 100.149725 |
| 100.222393 | 100.123119 | 99.7199788 | 99.9312688 |
| 100.135648 | 100.23335  | 100.330536 | 99.865103  |

|            |            |            |            |
|------------|------------|------------|------------|
| 100.341448 | 100.381314 | 100.3081   | 100.023682 |
| 99.9308682 | 100.215967 | 100.185317 | 99.8187596 |
| 99.8131232 | 100.135979 | 100.022254 | 99.9646251 |
| 99.8694487 | 99.7299607 | 100.187614 | 99.8605917 |
| 100.168832 | 100.122412 | 100.093804 | 100.228605 |
| 100.224576 | 100.170037 | 99.9279147 | 100.004133 |
| 100.249173 | 100.338069 | 99.9577712 | 99.8715282 |
| 100.134484 | 100.103616 | 100.052287 | 100.035439 |
| 99.8906981 | 99.5737998 | 99.8941715 | 99.7797983 |
| 100.071027 | 99.9230066 | 100.133907 | 99.9605239 |
| 100.058365 | 99.8882413 | 99.9572412 | 99.8280556 |
| 99.9337791 | 99.9976246 | 99.9296813 | 99.7290803 |
| 100.240149 | 100.230523 | 99.9909844 | 100.087524 |
| 99.8873506 | 99.7650085 | 100.105287 | 99.7788414 |
| 100.095915 | 100.136968 | 100.087797 | 99.9979814 |
| 100.254412 | 99.9931023 | 99.9477012 | 99.9379674 |
| 100.179312 | 100.017834 | 100.104757 | 99.8821913 |
| 100.358185 | 100.243101 | 99.7793386 | 100.021768 |
| 100.040608 | 99.8994058 | 99.7524854 | 99.8199899 |
| 100.115418 | 100.160569 | 99.8998248 | 100.230382 |
| 100.151804 | 99.9025149 | 100.207577 | 99.9833538 |
| 100.006697 | 99.9979072 | 100.24821  | 99.9024238 |
| 100.026927 | 100.07521  | 100.019428 | 99.8782268 |
| 99.8297152 | 100.088919 | 100.158287 | 99.7700922 |
| 100.220209 | 100.300054 | 100.31022  | 99.9145906 |
| 99.8380112 | 99.9914064 | 100.361276 | 99.710625  |
| 100.067534 | 99.9991791 | 100.234253 | 100.069889 |
| 99.7893995 | 99.6816285 | 100.455439 | 99.8506121 |
| 99.9291217 | 100.022497 | 100.143447 | 99.990736  |
| 99.5182513 | 99.7391466 | 100.302623 | 99.7983904 |
| 99.8908436 | 100.103051 | 100.019604 | 100.055535 |
| 99.8866229 | 99.9280942 | 100.14168  | 100.030791 |
| 99.7010544 | 100.069981 | 100.235667 | 99.9847209 |
| 99.7994421 | 99.9511296 | 99.931448  | 99.9923764 |
| 99.6140192 | 99.917071  | 100.082674 | 99.8426832 |
| 99.7247781 | 99.9899932 | 99.9968144 | 100.018897 |
| 99.822438  | 99.8212547 | 99.9839178 | 99.9119932 |
| 100.025035 | 100.216815 | 100.352796 | 100.09559  |
| 100.040463 | 99.9645552 | 100.264287 | 100.024229 |
| 99.925192  | 99.8724133 | 100.100341 | 100.075494 |
| 99.9889402 | 100.001299 | 99.9895711 | 100.022452 |
| 100.079307 | 100.279264 | 99.9318347 | 99.9459699 |
| 100.149035 | 100.371491 | 99.7134789 | 100.09764  |
| 100.078432 | 100.228468 | 99.6637403 | 99.9916486 |
| 100.355448 | 100.448252 | 99.728471  | 100.309622 |
| 100.118985 | 100.227901 | 99.8785686 | 99.9668946 |

99.9856557 100.303669 99.8607544 99.8557064  
100.102209 100.189449 99.8385308 100.033088  
100.094624 100.010671 99.9928614 99.8443551  
100.225911 100.187037 100.092339 99.8505095  
100.292722 100.304946 100.016672 100.06509  
100.098854 100.035927 99.8238914 99.9037102  
100.058885 100.170294 99.8933843 100.009291  
100.305705 100.178666 99.8335922 99.9794768  
99.9675672 100.142626 99.876452 99.7990866  
99.9462695 100.075229 99.7166537 99.9945207  
99.9805501 99.9134775 99.7619828 99.9221732  
99.9917824 100.017339 100.024609 99.8568005  
100.225619 100.119357 100.042776 99.97934  
99.9932411 99.8293381 99.7803261 99.8170026  
100.09404 100.057635 99.6949592 100.119932  
100.1273 99.9715096 99.6259954 99.9823488  
99.9862392 100.004711 99.6919607 99.8224731  
100.12059 100.144187 99.9392426 100.089708  
100.267923 100.143619 100.254253 100.034319  
100.168437 100.135532 100.081932 99.9668946  
100.35924 100.320411 99.7972584 99.9886399  
100.108044 100.29927 100.247198 100.038148  
100.412047 100.431368 100.300641 100.215529  
100.13153 99.9581721 99.9716961 100.269824  
100.029564 99.902694 100.091633 99.9813914  
100.283532 100.219529 99.9972709 100.365695  
100.126133 99.9818674 100.004679 100.128411  
99.9693177 99.9774688 100.226562 99.9496625  
100.158517 100.226766 100.122499 100.324529  
99.5367995 99.648857 100.235205 99.9030264  
99.7443791 99.9302202 99.9533528 99.8555697  
99.7083481 99.8158588 100.318808 99.9299686  
100.027813 100.001732 100.625529 100.151935  
99.9112596 99.713274 100.321983 100.011069  
99.9430603 99.8896404 99.9519418 100.217991  
99.8454702 99.6641808 100.124439 99.9065822  
99.8976933 99.763786 100.369957 100.00847  
99.9630451 99.8667965 100.233794 99.9685357  
99.937517 99.7874812 100.289705 99.9303789  
100.072597 99.8081968 100.210688 99.997803  
100.060343 99.8148656 100.134846 100.063039  
100.162747 99.71824 99.876452 99.9350289  
99.9786537 99.9385916 100.018613 99.8399787  
99.9535633 99.9828606 100.011028 99.9415935  
100.000972 99.7226386 100.24226 99.7445183  
100.061073 100.235137 100.024433 99.9972559

99.9618781 99.8009606 100.117031 99.854202  
100.172813 100.303101 100.083872 100.113641  
99.9855098 99.9147545 100.272244 99.8373802  
99.857286 100.019751 100.392005 99.8042836  
99.91549 99.9864078 99.9907449 99.9201217  
99.923659 99.9757662 99.8602253 99.8399787  
100.19659 100.436901 99.8217749 100.261892  
99.9560431 100.061183 99.935715 99.8670577  
99.9052788 100.10531 99.9785748 99.797172  
100.2157 100.362694 100.039072 100.018864  
99.9804042 100.186044 99.9403008 99.8691092  
100.207969 100.579498 99.9628772 100.128275  
99.7802642 100.1422 100.129907 99.9149247  
100.194256 100.534378 99.9055544 100.047995  
99.8743534 99.977327 100.015438 99.7434242  
99.8969639 100.178098 100.159362 100.143455  
99.6641481 99.828203 100.134493 99.8105747  
99.9544385 100.033798 100.303992 100.167389  
99.8711441 99.7836503 100.286531 100.068646  
99.9308068 99.9926508 99.976811 100.171492  
99.7566326 99.5923857 99.9519418 100.003821  
100.108482 99.9983263 99.9732835 100.186399  
100.147722 99.9401524 99.9223103 99.9839899  
100.110524 99.8551617 100.015791 100.166568  
99.970193 99.7425028 99.7805025 99.8492786  
99.9487494 99.9458279 100.153189 99.9028896  
100.039338 100.085587 99.8783922 100.01777  
99.8750827 99.9805904 100.15072 99.8661004  
100.033794 100.140214 100.009088 100.075074  
99.8393434 99.9024103 100.090928 99.9359862  
99.9392675 100.189591 99.9815733 100.064953  
99.8246101 99.7278884 99.9695796 99.9544492  
100.024021 100.087574 100.141724 100.190775  
99.9122807 99.7911703 99.8480552 99.9696298  
99.7559032 99.679079 99.8311229 99.9705872  
99.9362042 99.8537428 99.8163072 100.029258  
99.8742075 99.7687521 99.8953245 100.081228  
99.5384042 99.5518058 99.6833182 99.920532  
99.8962345 99.9327742 99.9325402 100.169577  
99.8532015 99.7657724 99.9334221 100.078767  
99.7661144 100.060331 100.020553 100.031857  
100.07887 100.393767 99.6736174 100.096819  
99.8585989 100.075371 99.8021969 99.9997177  
99.7588207 99.7364017 99.5711419 99.9693563  
99.9471448 99.8638168 99.8910914 100.179561  
99.9941164 99.6346682 99.9392426 99.9298319

|            |            |            |            |
|------------|------------|------------|------------|
| 100.303225 | 100.142484 | 99.7131261 | 100.138395 |
| 100.03219  | 100.107722 | 99.4385057 | 100.122257 |
| 99.8802295 | 99.9260061 | 99.8210834 | 100.223959 |
| 99.8489075 | 99.8736091 | 99.8154276 | 100.031438 |
| 99.7405188 | 100.058273 | 100.252161 | 100.211097 |
| 99.8701773 | 100.06238  | 100.34831  | 100.148428 |
| 99.7703839 | 99.9893074 | 100.552272 | 100.164985 |
| 99.9036846 | 99.9833596 | 100.172096 | 100.109705 |
| 99.6812254 | 99.7574858 | 99.9661899 | 99.8710724 |
| 99.8926126 | 100.141542 | 99.719279  | 100.020355 |
| 99.7387705 | 99.9799609 | 100.08178  | 99.8981648 |
| 99.8442456 | 99.9488059 | 100.113417 | 100.049089 |
| 99.7380421 | 99.6746418 | 100.082134 | 100.028154 |
| 99.9785661 | 100.154854 | 99.9313714 | 100.198235 |
| 99.6296534 | 99.9497972 | 99.8703948 | 99.9486554 |
| 99.9243717 | 100.174821 | 99.8751669 | 100.180447 |
| 99.5884249 | 99.8414627 | 99.8705716 | 100.056067 |
| 99.751445  | 99.9265726 | 99.852367  | 100.16088  |
| 99.8221017 | 99.8128568 | 100.450821 | 100.02446  |
| 100.016007 | 99.9238819 | 100.855564 | 100.093285 |
| 100.104728 | 99.9234571 | 100.821275 | 100.18852  |
| 99.8241413 | 99.6989994 | 100.245268 | 99.9293622 |
| 99.8653698 | 100.025985 | 100.081427 | 100.069203 |
| 99.9216037 | 99.9282719 | 100.01992  | 99.9813579 |
| 100.074572 | 100.121433 | 100.260468 | 99.9802633 |
| 100.228705 | 100.211783 | 100.303063 | 100.229021 |
| 100.085352 | 99.983218  | 100.552979 | 99.9866943 |
| 100.174365 | 100.197904 | 100.547853 | 99.922247  |
| 100.313056 | 100.083905 | 100.093269 | 100.235863 |
| 100.121919 | 99.9910068 | 100.080013 | 100.005714 |
| 100.224626 | 100.506481 | 99.9184691 | 100.195087 |
| 100.462673 | 100.545991 | 99.8587298 | 100.223685 |
| 100.35749  | 100.367133 | 99.8887762 | 100.033764 |
| 100.412995 | 100.58281  | 100.05085  | 100.369957 |
| 100.406585 | 100.358494 | 99.9851014 | 100.057983 |
| 100.272119 | 100.355804 | 100.22565  | 99.9412665 |
| 100.402943 | 100.416839 | 100.146822 | 100.376114 |
| 100.552706 | 100.234441 | 100.125789 | 100.157185 |
| 100.298196 | 100.436948 | 100.201259 | 100.012966 |
| 100.478699 | 100.380444 | 99.926776  | 100.073171 |
| 100.284939 | 100.33527  | 100.088496 | 100.075908 |
| 100.049805 | 100.131063 | 100.084255 | 100.15007  |
| 99.9309275 | 99.833674  | 100.246859 | 99.9975039 |
| 99.9220408 | 100.044537 | 100.022218 | 99.9258046 |
| 99.7952959 | 99.7542287 | 99.8361066 | 99.9379826 |
| 99.739936  | 99.6750667 | 99.9078645 | 99.8014256 |

99.8321539 100.017205 100.277612 99.8935126  
100.01994 99.9823684 100.053501 100.069203  
99.7014755 99.6170051 99.8986738 99.7795326  
99.9319473 99.960135 100.049966 100.01967  
100.114635 100.00446 99.9760875 100.086444  
99.9399599 99.7952967 99.9960595 99.9210156  
100.130223 100.160518 100.215045 100.031712  
100.283774 100.16066 99.8507763 100.082202  
99.9874528 99.930821 99.9000878 99.9245732  
100.049223 100.0308 99.7624045 99.9750637  
99.9315102 99.5902401 99.990934 99.752577  
99.9042673 99.9421501 100.067464 99.9092481  
100.232784 100.089995 100.063045 100.099443  
100.032469 99.7889241 99.9900503 99.9905256  
100.10196 99.8615719 99.8898366 100.121473  
99.9076181 99.6400881 99.8475949 99.8947441  
99.8612906 99.9267142 100.071176 99.7261687  
99.9622495 100.134461 100.033706 99.9045959  
99.8819777 99.9924229 99.7922742 99.9206051  
100.226374 100.346457 99.9799759 100.193445  
100.168829 99.9881745 99.7378371 100.128177  
99.7473659 99.8829556 99.8364601 99.957002  
99.7259504 99.7727801 99.8350461 100.017755  
99.9645804 99.7996867 99.7786649 99.821266  
100.024748 100.150181 99.8528972 99.9565915  
100.106185 100.113786 99.7417255 100.11942  
99.8547349 99.8226281 99.7376604 99.8464428  
100.052282 100.208809 99.6289631 100.049636  
99.9306361 100.066912 99.6535304 99.9498868  
99.796607 99.9969546 99.9278365 99.9377089  
100.05607 100.188416 99.7721254 100.268155  
100.203648 100.060964 99.8212601 100.048131  
100.029847 100.171423 99.7986369 99.8790086  
100.20321 100.436523 99.7305906 100.057983  
100.24575 100.385542 99.7109721 99.8690199  
99.8902817 100.28613 99.6494653 99.8222238  
100.042813 100.31077 99.8156043 100.19153  
99.8690119 99.9109951 100.005604 99.9840945  
99.9679312 99.9602766 99.9320784 100.091096  
100.039608 99.6306 100.008255 100.065509  
99.6242631 99.6795983 100.205501 99.9185526  
99.7543587 99.682289 100.219994 100.085897  
99.8263265 99.3915561 100.201259 99.8784612  
99.7132759 99.5470479 100.28097 99.9539918  
99.9336955 99.6267764 99.9792689 99.9601491  
99.6870528 99.6289006 100.083548 99.75504

100.036403 99.8137065 99.9603573 99.9580967  
100.025039 99.6283342 100.064459 99.8805137  
99.8985857 99.7243482 100.046962 99.8896813  
100.074135 99.9585773 99.914404 100.01926  
99.9549653 99.7984122 99.9172319 99.8088144  
99.7473659 99.8757333 99.9168784 99.699213  
100.038588 100.130779 99.7883858 99.9193736  
100.051117 100.055016 99.9656596 99.8084039  
99.8978573 100.22297 100.061101 99.8417906  
99.9925517 99.9710393 99.8274461 100.057162  
99.8797925 99.7362438 99.6964791 99.8222238  
99.5320991 99.8804404 99.4489008 99.6153954  
99.7436369 100.0209 99.4016036 99.7329225  
99.8845651 100.31172 99.8122775 99.9077098  
100.253337 100.504658 100.314369 100.269311  
99.876849 99.918066 100.261071 99.9875189  
100.102509 100.03165 100.156771 100.179662  
99.923 99.7143785 100.068706 99.7908661  
99.6452202 99.6269626 99.9922892 99.7159767  
100.127113 99.8902004 100.117415 99.9071632  
99.7803248 99.5822645 100.186596 99.7005342  
100.059706 99.8037747 100.498616 99.9672933  
99.814101 99.4029063 100.664686 99.8714951  
100.201945 99.9992581 100.372961 99.8556426  
100.118232 99.9783236 100.239541 100.003918  
100.201945 100.024861 100.246247 99.9257489  
100.202964 100.008169 100.25966 99.9622369  
100.173264 99.7054672 100.384609 99.9817792  
99.7169945 99.3925805 100.515029 99.7356557  
99.7835277 99.6780259 100.495793 99.9314886  
99.8900974 99.7220168 100.314016 99.8593324  
100.114884 99.9210365 100.346312 100.117482  
99.7963394 99.496546 100.114238 99.8746383  
99.9020355 99.6804306 100.659392 100.0251  
99.8557389 99.4078571 100.379138 99.810545  
99.7752293 99.7152272 100.553149 99.7841698  
100.110953 99.7674221 100.526324 99.861519  
99.8914076 99.5869324 100.826697 99.8601524  
100.123473 99.9184904 100.757692 99.9868356  
99.9183412 99.9525798 100.454319 99.9757662  
100.144438 100.030236 100.29125 100.145497  
99.9377043 99.7334742 100.027409 99.9026535  
100.275757 100.206058 99.9585812 100.177475  
100.206312 100.02288 99.9299911 99.9135862  
99.7370855 99.8856741 100.133828 99.8654821  
99.9407616 100.010857 100.018056 100.014031



99.8340464 99.7377177 99.8539273 99.918096  
100.068296 100.26872 99.7880994 100.214647  
99.9465851 100.027548 99.9024598 100.215603  
99.4329544 99.902648 99.8549862 99.9328552  
99.9435278 100.248351 99.9063424 100.15069  
99.7632912 99.7826987 100.165418 100.051066  
100.022145 99.9405565 100.103826 100.21902  
99.7992511 99.4382688 99.890812 99.947751  
99.9969582 99.9868106 99.6605029 100.072521  
100.218541 99.9655931 99.9758764 99.9789094  
99.8263303 99.7736459 99.9689936 99.8712218  
99.9224177 99.6863715 99.8352202 99.766814  
99.700252 99.7224411 99.6380897 99.6726557  
100.032627 100.169564 99.5710265 100.067875  
100.183164 100.364481 99.4476655 99.8344604  
100.163655 100.951073 99.545966 100.141124  
100.380143 100.971866 99.4596662 100.320831  
100.00846 100.619091 99.3802493 99.9518508  
100.177049 101.151083 99.5775563 100.14618  
100.461235 100.996195 99.821631 100.102039  
100.111681 100.764925 99.7436259 99.9381849  
100.138177 100.862243 99.718742 100.03043  
99.9743922 100.410452 99.9931716 100.004601  
100.253773 100.323036 100.210068 100.1511  
99.8464213 99.8138176 100.084236 100.006241  
99.9358117 99.6486044 99.881282 100.129781  
99.8662211 99.3763138 99.7296839 99.9038834  
100.126094 99.9849717 99.6347365 99.9634669  
99.7175769 99.6000872 99.7190949 99.9243823  
99.8925723 99.8262652 99.6756803 100.027423  
99.7590691 99.5508627 99.6883871 99.9310786  
99.9761392 99.6094229 99.5999695 99.9014235  
99.5939736 99.5873567 99.7446848 99.7706405  
99.8717534 99.7603497 99.654679 99.9375016  
100.127986 99.8322061 99.3377171 99.7236297  
99.8842739 100.13406 99.5053751 99.6645928  
100.364711 100.336899 99.8230429 99.9262955  
100.330789 100.386547 99.6094996 99.8277641  
100.599688 100.699717 99.5124344 99.9641502  
100.254647 100.585567 99.9015774 99.8869376  
100.328314 100.62786 100.271131 100.138938  
99.9444013 100.088371 100.431024 100.112562  
99.9621629 100.143395 100.261601 100.262888  
99.6229454 99.7968437 99.7928645 99.9733064  
99.7705705 100.05018 99.6675622 100.134291  
99.6500245 99.762047 99.9031658 100.02469

|            |            |            |            |
|------------|------------|------------|------------|
| 99.9551747 | 100.032074 | 100.046293 | 100.196744 |
| 99.8033276 | 99.6733581 | 100.137534 | 100.057352 |
| 100.014574 | 100.016939 | 100.437024 | 100.196061 |
| 99.8686961 | 99.7323426 | 99.9825827 | 99.9823259 |
| 99.9742466 | 100.006189 | 99.9146371 | 100.229679 |
| 99.7581956 | 99.7599253 | 100.064117 | 99.9726231 |
| 100.034228 | 100.080167 | 99.935109  | 100.15766  |
| 100.114156 | 99.9728071 | 100.114238 | 100.266167 |
| 99.8790328 | 99.8262652 | 100.101885 | 100.243755 |
| 100.071353 | 100.008877 | 99.8158071 | 100.221616 |
| 100.063055 | 100.205209 | 99.8129834 | 100.353083 |
| 99.9398881 | 100.093747 | 99.6610323 | 100.15971  |
| 99.7924085 | 99.9846888 | 100.026527 | 100.041226 |
| 100.085621 | 100.087806 | 99.683975  | 100.095343 |
| 100.047622 | 100.118925 | 99.9938776 | 99.9774061 |
| 100.400234 | 100.33506  | 99.8031004 | 100.139211 |
| 100.221599 | 100.244673 | 100.258071 | 100.061998 |
| 100.488023 | 100.493483 | 100.158535 | 100.135521 |
| 100.334574 | 100.195449 | 100.276778 | 100.152057 |
| 100.547846 | 100.344505 | 100.708846 | 100.328614 |
| 100.419119 | 100.291137 | 100.481306 | 100.297835 |
| 100.067111 | 100.11885  | 100.363247 | 100.329383 |
| 100.603251 | 100.29453  | 100.59806  | 100.359546 |
| 100.036422 | 100.227435 | 100.321656 | 100.291372 |
| 100.271647 | 100.213862 | 100.421997 | 100.338771 |
| 100.20662  | 100.150623 | 100.222434 | 100.311224 |
| 100.241622 | 100.050212 | 100.563929 | 100.210117 |
| 100.288567 | 100.265379 | 100.181775 | 100.470656 |
| 100.03974  | 100.189955 | 100.163871 | 100.200422 |
| 100.545855 | 100.154017 | 100.46191  | 100.308146 |
| 99.974879  | 100.380751 | 100.258803 | 100.359084 |
| 100.177259 | 100.10759  | 100.112954 | 100.359854 |
| 100.055665 | 100.176536 | 100.111835 | 100.319688 |
| 100.044053 | 100.062243 | 100.324827 | 100.297528 |
| 100.255888 | 100.275559 | 100.113327 | 100.440955 |
| 100.063959 | 100.103888 | 100.278759 | 100.266595 |
| 100.152874 | 100.510314 | 99.9318553 | 100.35693  |
| 100.0341   | 100.130572 | 99.726697  | 100.085156 |
| 100.324067 | 100.688617 | 100.270926 | 100.297374 |
| 99.7127808 | 100.473605 | 99.7114034 | 100.303222 |
| 99.9163216 | 100.769131 | 99.7962643 | 100.47989  |
| 99.9277677 | 100.422088 | 99.6519075 | 100.34031  |
| 100.190861 | 100.97782  | 99.4594317 | 100.60285  |
| 100.91329  | 100.843013 | 99.7964508 | 100.52575  |
| 99.2172824 | 99.8260994 | 100.108851 | 99.9526552 |
| 100.005236 | 100.263991 | 99.9197323 | 100.277214 |

99.7691817 100.281574 99.738074 100.382168  
100.021327 100.072423 99.7955183 100.123168  
99.7569062 99.4610101 99.9432323 99.7027344  
100.175102 99.4216785 100.435985 99.567617  
99.2763375 99.546614 100.106426 99.5756194  
100.375491 99.9093898 100.406517 99.8158451  
99.747119 99.636074 100.056629 99.6167086  
100.327716 99.5045061 100.440648 99.5734649  
100.207284 99.7610095 100.297224 99.7664457  
100.002914 99.6066139 100.644314 99.679035  
100.513342 99.9598267 100.488394 99.9549636  
99.8149659 99.8045056 100.239593 99.9137205  
100.42393 99.7895442 100.544346 99.9355732  
99.894093 99.8310351 99.998252 100.067613  
100.025972 99.6124751 100.526628 99.9683522  
99.9989323 100.077359 99.2259243 100.189341  
99.8849694 100.317512 99.614606 100.240434  
99.7693476 99.9436313 100.310279 100.050531  
100.029621 100.088001 100.22374 100.128862  
99.7895855 99.8436829 100.29797 99.8424684  
100.433551 100.160957 100.431882 100.140404  
99.7583992 99.7159711 100.371267 99.7362829  
100.112729 100.262603 99.4614833 100.307684  
100.314446 100.287435 99.8967919 100.299528  
99.9148287 99.8662022 100.178232 99.9822025  
100.186548 100.040341 99.8995895 100.076231  
99.9196393 99.7219865 99.8773951 99.8863277  
100.348452 99.9886698 100.011867 99.9121816  
99.7943962 99.6186448 100.108851 99.7373601  
100.563605 99.9442483 100.113514 99.9517319  
99.8194448 99.7590044 99.887653 99.6744182  
100.318261 100.02939 100.188676 99.9298792  
99.9551387 99.7600841 100.048609 99.7567505  
100.276292 99.7966393 100.186998 99.7124296  
99.6339854 99.698696 99.8042842 99.6507188  
100.334186 100.019981 100.071549 100.021753  
99.4840254 100.045122 99.4922571 100.020829  
100.203303 100.26723 99.6369869 100.166411  
99.4058936 99.6022952 99.428658 99.6998104  
100.20098 100.181009 99.6125544 100.030832  
99.6281795 100.092166 99.4234358 99.9471151  
100.373666 100.771291 99.3311145 100.418949  
100.316436 100.52142 99.6893955 100.175183  
100.156855 100.442294 99.6071457 100.105778  
100.181903 100.184402 100.085538 99.7285882  
99.7899173 100.009492 100.135895 99.6787272

99.7832819 99.5873338 100.480747 99.4589692  
99.8244214 99.6491845 100.088335 99.5553057  
99.5591713 99.4341721 100.098593 99.5696176  
100.27397 99.7229119 99.9803473 99.8969463  
99.7696793 99.5617297 99.9383831 99.6231721  
100.400706 99.8085159 99.936145 99.8855583  
99.747119 99.636074 99.651721 99.7790649  
100.564102 99.8888757 100.065768 99.8537026  
100.132636 99.8982844 99.528253 99.908796  
100.554149 99.9374617 99.8145421 99.9942061  
99.7091313 99.7688759 99.6125544 99.8161529  
100.092491 100.14615 99.5946497 100.111934  
99.3191358 99.3268201 99.6867844 99.54915  
100.14375 99.761935 99.7216613 100.119628  
99.5530336 99.7465109 99.5248959 100.029447  
100.017843 100.117461 100.153799 100.068536  
100.734466 100.495044 100.018022 100.342926  
99.4395683 100.051138 99.7203558 99.908796  
100.459761 100.225122 100.217398 100.037142  
99.3926228 100.01921 100.160141 100.038065  
99.963433 100.834838 100.274843 100.214118  
99.2416675 99.7725777 100.048982 99.6297895  
100.159343 100.331086 100.130859 100.148406  
99.2360274 99.6343774 99.5663005 99.8610894  
99.1230598 99.29736 100.002542 99.4737428  
100.242617 100.211703 100.610743 99.9306487  
99.044928 99.0572061 99.8887721 99.5866997  
99.6426684 99.508737 100.159406 99.8478181  
100.54569 100.47418 100.066383 100.315008  
99.2345304 99.9112628 99.5652204 99.9887459  
100.329656 100.676062 100.127091 100.226504  
100.451799 100.737679 99.4484753 100.29373  
99.5918173 99.6281014 99.5975354 99.8251525  
100.755908 100.629617 100.74145 100.294347  
99.7257584 99.924732 99.841299 99.7745788  
99.4115121 99.5318048 99.6806579 99.372765  
100.980417 100.426341 100.625265 100.185181  
99.3604948 99.4406172 100.402796 99.6341136  
99.0276364 99.5773212 100.526079 99.6194657  
100.409257 100.408382 100.006797 100.243464  
99.4469084 99.5410938 100.009225 99.6814493  
99.4781502 99.2687696 100.475645 99.4675906  
99.2425071 99.0987798 100.248132 99.5209396  
99.6202341 99.4472743 100.426519 99.5858527  
99.6898635 99.4821083 100.545318 99.6873084  
100.051305 99.7220757 100.260647 99.8646246

|            |            |            |            |
|------------|------------|------------|------------|
| 99.9668855 | 99.691267  | 100.335177 | 99.677132  |
| 100.327164 | 100.153398 | 100.471162 | 100.02791  |
| 99.9730342 | 99.8369504 | 100.553724 | 99.8650872 |
| 100.5309   | 100.129401 | 100.31463  | 100.008636 |
| 100.119937 | 99.6787267 | 100.349934 | 99.7457457 |
| 100.222803 | 99.8244101 | 100.467239 | 99.9673138 |
| 99.8063557 | 99.3916948 | 100.328826 | 99.9423354 |
| 99.9672179 | 99.6189671 | 100.512069 | 99.928921  |
| 99.9522617 | 99.524838  | 100.641143 | 99.8777306 |
| 99.8487316 | 99.6110714 | 100.370668 | 99.7799754 |
| 100.400449 | 100.421232 | 99.8461556 | 100.250557 |
| 99.8882824 | 99.9642105 | 99.8186972 | 99.9782612 |
| 99.6601173 | 99.4819535 | 99.9718667 | 99.7372653 |
| 100.073573 | 99.9412975 | 100.413817 | 100.058439 |
| 99.6162458 | 99.694673  | 100.248319 | 99.9045593 |
| 99.9575794 | 100.141632 | 100.328266 | 99.9946051 |
| 99.6712514 | 99.919623  | 100.071053 | 99.9044051 |
| 99.8440785 | 99.651324  | 99.9376838 | 100.031764 |
| 100.077561 | 100.001831 | 99.8693179 | 100.26243  |
| 99.3583345 | 99.7104644 | 100.152121 | 99.8636995 |
| 99.9854977 | 100.59277  | 99.4959205 | 100.248398 |
| 100.213829 | 100.639835 | 99.469396  | 100.422477 |
| 99.8734924 | 100.397855 | 99.6718786 | 100.266901 |
| 100.837336 | 100.901012 | 100.129519 | 100.527941 |
| 99.556421  | 100.013133 | 99.8932272 | 100.071391 |
| 100.315697 | 101.257402 | 99.8616594 | 100.596555 |
| 100.088529 | 100.52465  | 99.26187   | 100.259192 |
| 100.104649 | 100.353112 | 99.7507049 | 100.087426 |
| 101.103723 | 100.813076 | 99.9313328 | 100.359876 |
| 99.8374313 | 100.305583 | 99.4525847 | 100.105004 |
| 100.817228 | 100.608252 | 99.5420581 | 100.509901 |
| 99.3998795 | 99.6342941 | 99.5807241 | 99.7240052 |
| 100.480382 | 100.364259 | 99.4897564 | 100.140467 |
| 100.634929 | 100.713838 | 99.1780004 | 100.333048 |
| 99.5278381 | 99.9304602 | 99.0988005 | 99.9306171 |
| 100.198374 | 100.891568 | 99.7210049 | 100.245315 |
| 100.294759 | 100.650982 | 99.7591105 | 100.207076 |
| 99.685709  | 100.005547 | 99.7619124 | 99.7724202 |
| 100.660687 | 100.69882  | 99.7081163 | 100.245777 |
| 99.4146695 | 99.8934588 | 99.8418594 | 99.8364082 |
| 99.1286738 | 99.2523589 | 99.6281693 | 99.6786739 |
| 100.48088  | 100.415039 | 100.100566 | 100.471663 |
| 99.4204858 | 99.6158708 | 100.130827 | 100.039936 |
| 100.267837 | 100.838156 | 100.145957 | 100.407366 |
| 99.2268861 | 100.186219 | 99.1690344 | 100.338444 |
| 99.0274702 | 99.6358422 | 99.2069531 | 100.12952  |

100.866418 100.271678 99.7368823 100.382542  
99.1474521 99.8157404 99.2719568 100.253641  
100.501486 100.574966 100.120553 100.477676  
100.526912 100.480682 99.2284342 100.2006  
99.7289158 100.065771 98.752488 99.9853538  
100.767541 100.22771 100.313136 99.9835035  
99.7339012 99.4098085 99.9358158 99.6325717  
100.14503 99.5858361 100.557086 99.7303269  
99.9117138 99.4465003 100.472656 99.8556817  
99.9630634 99.7883376 100.550922 99.7551511  
100.01541 99.9041412 100.639648 99.7714951  
99.6263828 99.9560052 100.307532 99.8530605  
100.027541 99.8121796 100.375524 99.6871542  
99.8457403 99.8821571 100.372909 99.8809685  
100.210007 99.7189793 100.479754 99.762398  
100.318024 100.364104 100.012214 100.153573  
100.638253 100.475418 99.9038744 100.370361  
100.036681 99.8375696 99.7564954 100.04302  
100.304231 100.158816 100.327519 100.073395  
100.055958 99.8583152 100.315191 99.9791863  
100.048148 100.190089 99.8639009 100.179322  
99.9964655 99.6432735 99.9023801 99.8066499  
100.226459 99.8079995 100.102808 99.9016297  
99.9755269 99.6099877 100.094029 99.9110352  
100.547851 99.9436197 99.9388045 100.141084  
99.9881566 99.4082603 99.7966557 99.8687877  
100.451466 99.9913036 99.6197636 100.143088  
99.7995423 99.6333652 99.7837671 99.756693  
99.6835487 99.6751659 99.8698782 99.8148219  
100.717188 100.161603 99.8642745 100.161436  
99.7815949 99.8151211 100.115323 99.8282362  
100.47872 100.66538 100.340034 100.305448  
99.2835535 99.8964004 99.5803505 99.7603935  
99.6051117 99.9024382 99.9247951 99.8954622  
100.79672 100.303766 99.9937146 100.142827  
99.4834289 99.8242882 99.7507142 99.4612158  
100.14373 100.333134 100.118761 100.127883  
98.8179773 99.4771227 99.5129397 99.6151331  
99.3639633 99.7116063 99.8343272 99.7738266  
100.551641 100.298047 99.8634425 100.163319  
99.1863434 99.256396 99.5607185 99.606351  
100.4674 100.273006 99.9108481 100.344969  
100.800209 100.427113 99.9270854 100.39535  
99.4731272 99.6233465 99.5448545 99.9460783  
100.33298 100.012864 100.501365 100.203223  
100.356907 100.017347 100.075088 100.212314

|            |            |            |            |
|------------|------------|------------|------------|
| 100.055834 | 99.8252156 | 100.346644 | 99.8684264 |
| 100.468895 | 99.8474738 | 100.455639 | 99.8664235 |
| 99.5508879 | 99.3713965 | 100.116521 | 99.6705988 |
| 100.505449 | 99.5231848 | 100.578446 | 99.8733567 |
| 99.6264885 | 99.4466723 | 100.304651 | 99.9077146 |
| 100.349596 | 99.9235225 | 100.478782 | 99.8645746 |
| 99.8396656 | 99.8538112 | 100.230929 | 99.7753673 |
| 100.456268 | 99.7456118 | 100.809128 | 99.8206643 |
| 100.039716 | 100.031567 | 100.610921 | 99.7235993 |
| 100.066301 | 99.8678771 | 100.646941 | 99.7692044 |
| 100.085741 | 100.139921 | 100.088712 | 99.9054035 |
| 99.7366494 | 99.9601557 | 99.6896842 | 99.9406858 |
| 100.306562 | 100.220916 | 99.6392924 | 100.166709 |
| 99.7095661 | 99.7695702 | 99.6557164 | 99.863188  |
| 100.400273 | 99.9561369 | 99.9871823 | 99.9548604 |
| 99.5068567 | 99.8547386 | 99.8124908 | 99.7582654 |
| 100.610127 | 99.8037303 | 100.356909 | 99.8063356 |
| 99.8489703 | 99.9031192 | 100.034028 | 99.7570328 |
| 99.9902022 | 99.7828633 | 100.255565 | 99.8146555 |
| 99.8298624 | 99.8700411 | 100.022457 | 99.9297468 |
| 99.7785205 | 99.5677011 | 100.265644 | 99.7701289 |
| 100.021273 | 99.8822521 | 100.072288 | 99.895697  |
| 99.62167   | 99.4987626 | 100.084793 | 99.8109578 |
| 98.8463898 | 99.0812676 | 100.22589  | 99.634238  |
| 100.200389 | 99.8451552 | 100.309316 | 100.137281 |
| 100.121963 | 100.215352 | 99.6316403 | 100.453589 |
| 99.9405218 | 100.295265 | 99.680539  | 100.344507 |
| 100.069292 | 100.409956 | 99.8871453 | 100.40367  |
| 100.031741 | 100.361575 | 99.7165598 | 100.13081  |
| 100.357405 | 100.492806 | 99.9252191 | 100.324323 |
| 100.072449 | 100.37595  | 99.5622116 | 100.160392 |
| 100.32002  | 100.215661 | 99.7501543 | 100.093525 |
| 99.7549264 | 100.035586 | 99.9009564 | 99.804949  |
| 99.9843868 | 99.8989458 | 100.435483 | 99.8450075 |
| 99.9845529 | 100.209942 | 99.9446292 | 100.008631 |
| 99.9873776 | 99.9068289 | 100.376319 | 99.9594826 |
| 100.177791 | 100.223698 | 100.24922  | 99.9295927 |
| 99.8634258 | 100.101279 | 100.217118 | 99.8807521 |
| 100.429018 | 100.400991 | 100.054745 | 100.160083 |
| 99.6977691 | 99.8853436 | 99.7034953 | 99.770437  |
| 100.461751 | 100.366831 | 99.6740067 | 100.198293 |
| 99.790816  | 99.7598323 | 99.3542989 | 99.8462401 |
| 100.312377 | 100.407947 | 99.8905047 | 100.091059 |
| 99.9584666 | 100.268833 | 99.227013  | 99.9725786 |
| 100.158684 | 100.383834 | 99.5612785 | 100.024193 |
| 100.048024 | 100.268833 | 100.181097 | 99.9201944 |

99.9051307 100.258786 100.279455 99.7685882  
99.6625442 99.96402 99.9487352 99.7554921  
100.214346 100.446435 99.709281 99.9665698  
100.090061 100.159243 99.6344398 100.021111  
99.7899852 100.301602 99.5194719 100.142827  
100.547154 100.303921 99.8029724 100.059475  
99.6191777 99.8570571 99.2367181 100.104464  
100.054504 100.157542 100.030482 100.087978  
99.5130045 99.7616871 99.9039426 99.8702752  
99.9518204 100.232818 100.30857 100.003855  
99.8215547 99.7119154 100.234662 99.9109501  
100.194739 100.367295 99.9957676 100.173642  
99.5686665 99.7508672 100.077514 99.8687345  
100.229964 100.274707 99.9506016 100.098455  
99.6389501 99.7967746 99.8839725 99.8691967  
99.797296 99.8672588 100.177738 99.8124985  
99.8265393 99.6575066 99.6667279 99.6308484  
100.080757 100.030022 99.7124538 100.003701  
100.842578 100.519701 100.126413 100.274713  
99.302652 99.6969221 99.6741934 99.8131148  
100.388975 100.652632 100.747725 100.463142  
99.448204 100.101279 99.6824054 100.107699  
100.163668 100.690656 100.149556 100.27271  
100.247577 100.61538 99.5573591 100.422313  
99.7991237 100.082576 99.3916261 99.9422266  
100.487837 100.58122 100.459559 100.370853  
99.352997 99.7190256 99.504541 99.9926079  
99.8109207 99.8691136 99.2796444 99.9463865  
100.976998 100.23931 100.180911 100.343891  
99.6254916 99.6813104 99.464041 100.204918  
100.570416 100.137139 99.4737461 100.361609  
100.681242 100.130029 100.512563 100.409679  
99.2072789 99.3387821 99.8507512 100.216474  
99.7785205 99.3859261 99.7671382 99.9836718  
100.786584 99.9293962 100.353549 100.344969  
99.3340553 99.3638225 100.266763 99.9360637  
99.3609725 99.3001395 100.481582 99.7471722  
100.203213 99.9181125 100.242687 99.7638119  
99.4712995 99.959692 100.335259 99.6812297  
100.467898 100.223544 100.859707 99.865345  
99.5934236 100.29681 100.042613 100.07103  
100.760996 101.058379 99.7714308 100.378094  
100.482354 100.969038 99.977104 100.176415  
100.082433 100.606091 99.92913 100.006055  
100.214112 100.420117 100.527864 100.047449  
99.8840848 100.395423 100.367879 99.9289613



|            |            |            |            |
|------------|------------|------------|------------|
| 100.11726  | 100.372428 | 100.492996 | 99.9331161 |
| 99.8754609 | 100.406073 | 100.254136 | 99.8720256 |
| 100.102997 | 100.124565 | 100.417478 | 99.8681786 |
| 100.166681 | 100.133208 | 100.22859  | 99.8334016 |
| 99.8295225 | 99.8316366 | 100.145055 | 99.6453599 |
| 99.9464416 | 100.280752 | 99.9684738 | 99.870179  |
| 100.091886 | 100.239545 | 100.016395 | 99.9334238 |
| 99.5683202 | 100.036594 | 99.5778328 | 99.8543294 |
| 99.9119463 | 99.8746962 | 99.6848628 | 99.9034172 |
| 99.8398048 | 99.7646551 | 99.7879771 | 100.088689 |
| 100.206981 | 100.164538 | 100.01136  | 99.9837427 |
| 99.5771099 | 99.6171105 | 100.479757 | 99.8361715 |
| 98.8202037 | 98.8232097 | 101.068981 | 99.5821151 |
| 99.9928776 | 99.577292  | 100.662491 | 99.8851054 |
| 100.035002 | 99.9549505 | 100.437989 | 100.088074 |
| 99.5630133 | 99.7192805 | 100.32984  | 100.13116  |
| 100.024388 | 99.9608153 | 100.589211 | 100.05422  |
| 99.6762838 | 99.7030753 | 99.8336607 | 100.024213 |
| 99.9003373 | 99.9393626 | 99.8413057 | 100.08792  |
| 100.588253 | 100.464411 | 100.013971 | 100.229643 |
| 100.657078 | 100.749006 | 99.278186  | 100.297505 |
| 99.6731328 | 100.413326 | 99.2205688 | 100.10854  |
| 100.85725  | 101.007517 | 100.100303 | 100.515553 |
| 99.5892164 | 100.365328 | 100.0177   | 100.029753 |
| 100.14479  | 100.549604 | 99.969779  | 99.9675853 |
| 100.436507 | 100.811666 | 99.9408772 | 100.322279 |
| 99.7336654 | 100.097402 | 99.865546  | 99.7772353 |
| 100.040806 | 99.9878239 | 100.020497 | 99.9485041 |
| 99.4331584 | 99.4792891 | 99.6423492 | 99.8295546 |
| 100.31909  | 99.7271516 | 100.101422 | 99.8569453 |
| 99.8467701 | 99.3288122 | 100.143563 | 99.5835    |
| 100.20499  | 99.8466071 | 99.7909606 | 100.103769 |
| 100.199186 | 100.234297 | 99.5957333 | 100.23703  |
| 100.221741 | 100.000942 | 99.9285706 | 99.9946682 |
| 100.276634 | 100.078573 | 99.5287929 | 100.037755 |
| 100.413289 | 99.808795  | 100.000359 | 99.9135733 |
| 100.055234 | 100.021778 | 99.862749  | 99.9954376 |
| 100.57482  | 100.021932 | 100.074199 | 99.9685086 |
| 100.288575 | 99.5302198 | 100.037652 | 99.9326544 |
| 100.531037 | 100.340326 | 99.7527356 | 100.297966 |
| 100.333353 | 100.178428 | 99.6539099 | 100.347362 |
| 99.7267    | 99.7316273 | 99.7754841 | 100.031138 |
| 100.449443 | 100.050021 | 99.9634393 | 100.226412 |
| 100.009628 | 99.783021  | 99.8252698 | 99.9583525 |
| 100.298692 | 99.9555679 | 99.8129633 | 100.180248 |
| 100.057225 | 99.8424401 | 99.7665338 | 100.197482 |

|            |            |            |            |
|------------|------------|------------|------------|
| 100.41445  | 99.8813326 | 100.134799 | 100.081149 |
| 100.163861 | 99.7297753 | 99.7920793 | 99.8880291 |
| 100.708821 | 99.9382823 | 100.025159 | 100.035446 |
| 100.104987 | 99.7415048 | 99.6345177 | 100.028676 |
| 100.304994 | 99.7925898 | 99.8435433 | 100.093767 |
| 99.8529063 | 99.858954  | 99.7396831 | 100.003439 |
| 100.470339 | 100.137992 | 99.6292967 | 100.235799 |
| 99.7782771 | 99.8171291 | 99.8265751 | 99.9488119 |
| 100.195869 | 100.185527 | 99.847459  | 100.105308 |
| 99.6127661 | 99.7269973 | 99.5507956 | 99.7850832 |
| 100.261045 | 100.150493 | 99.8077423 | 100.163013 |
| 99.8358245 | 99.85988   | 99.7079843 | 100.028214 |
| 99.9573872 | 100.016993 | 99.7788404 | 99.9572753 |
| 99.6048056 | 100.015604 | 99.7719413 | 99.9469653 |
| 100.004984 | 100.31733  | 100.106457 | 100.11608  |
| 99.6936973 | 99.9205337 | 100.010987 | 99.7456898 |
| 99.8393072 | 100.000171 | 100.356691 | 99.7229156 |
| 99.4271881 | 99.8251545 | 100.30243  | 99.7870836 |
| 99.9199068 | 100.100643 | 100.116899 | 100.012211 |
| 99.4769409 | 99.8731528 | 99.6596903 | 99.8787963 |
| 100.168505 | 99.8517002 | 100.09471  | 99.9926678 |
| 99.4751166 | 99.8422857 | 99.7503115 | 99.8898757 |
| 100.387252 | 100.085981 | 100.084268 | 100.113156 |
| 99.6847418 | 99.9384366 | 99.9220444 | 99.9952837 |
| 100.247778 | 100.316712 | 100.097879 | 100.45554  |
| 99.5320007 | 99.8225308 | 99.8482048 | 100.139316 |
| 100.058551 | 100.117003 | 99.8017754 | 100.071454 |
| 100.214278 | 100.016067 | 100.276139 | 100.042217 |
| 99.7417917 | 99.9268615 | 100.355945 | 100.044525 |
| 99.5392977 | 99.6433475 | 100.067486 | 99.9340394 |
| 100.069331 | 99.8980008 | 100.0177   | 99.9108034 |
| 99.7560542 | 99.6648001 | 100.324246 | 99.7459976 |
| 100.146614 | 100.119935 | 100.385593 | 99.9757409 |
| 99.9792785 | 100.000634 | 100.251152 | 99.8847977 |
| 100.385759 | 100.107125 | 100.134426 | 99.8991085 |
| 99.9286965 | 99.7790083 | 100.215165 | 99.7638477 |
| 99.9961944 | 99.9978557 | 100.213114 | 100.028984 |
| 99.7633513 | 99.7935158 | 100.247237 | 99.7912384 |
| 100.03069  | 100.029186 | 100.020311 | 99.969278  |
| 99.9492609 | 99.8253089 | 100.555834 | 99.8043182 |
| 100.163696 | 100.125645 | 100.245372 | 99.9354243 |
| 99.46102   | 99.7672788 | 100.017327 | 99.8366331 |
| 99.7809306 | 100.099254 | 99.9507598 | 99.8446349 |
| 100.21859  | 100.205128 | 99.9022793 | 100.132237 |
| 99.9306866 | 100.102186 | 100.175448 | 100.167476 |
| 100.437004 | 100.369804 | 100.333196 | 99.9674314 |

99.6228825 100.369804 99.8079287 99.9526589  
100.466359 100.405455 100.47379 100.253341  
99.5457656 100.102186 100.176008 99.930654  
100.270664 100.63063 100.429039 100.231336  
99.3084447 100.129658 99.8338472 100.041756  
102.718961 99.9457216 100.180882 100.132296  
103.201643 100.948099 99.8629544 100.46929  
102.486416 100.855095 99.186032 100.521952  
100.806683 99.4937541 98.7147473 100.167403  
101.286362 98.9602041 99.6771682 100.067289  
101.367452 99.1554584 100.675504 99.9039035  
100.24334 98.8780776 100.05556 99.7889357  
97.9389102 96.3691416 100.045407 99.5381671  
100.118057 98.6877183 99.6611051 100.090051  
99.034276 96.7824933 100.453045 99.9044822  
97.4532252 96.1042702 100.967064 99.8375463  
101.493164 102.26321 100.651712 100.36879  
105.027681 104.944558 99.7170228 100.460996  
103.173325 103.823069 98.8914411 101.404657  
102.333674 102.469886 98.7274765 101.578652  
102.432784 103.20141 98.6435242 101.584632  
101.994724 103.200322 98.9767573 101.929535  
101.807658 102.008129 100.447438 101.254582  
102.102416 103.784454 100.351969 100.708485  
100.617043 100.786566 100.304538 99.7574932  
99.1608458 98.8215137 100.154363 98.7231691  
100.930679 100.340581 99.9322075 99.0914132  
102.230273 101.893369 99.7720313 99.521192  
101.524914 101.184145 98.985395 100.109534  
99.8280192 100.08278 98.4574349 99.8448764  
101.628744 100.54345 98.865225 99.794144  
102.930483 101.998883 100.558213 99.5015163  
102.346974 102.22949 100.327268 99.9243508  
100.980449 101.309782 99.583972 99.7171773  
100.426974 100.510273 99.2322512 99.1321148  
101.200981 99.8597879 100.321964 100.168947  
101.468279 101.15967 100.480625 100.862611  
100.611036 99.6150402 99.1848197 100.987803  
100.02195 98.7230707 99.7368744 100.785645  
99.4534582 98.4021793 101.503662 100.380364  
99.5358359 99.2120223 99.8608329 100.346414  
99.5319745 99.6215668 99.4190982 99.8585722  
100.09446 99.7966974 99.4842597 99.6685668  
98.9845061 98.1035871 100.10875 99.7949156  
98.9162871 97.954019 101.043742 100.5451  
100.203438 99.4235931 99.9370567 100.738191

99.8202963 99.3822579 99.3853051 100.517708  
98.6777351 98.3891261 99.7459667 100.357216  
100.638495 99.4143471 101.192553 99.593722  
100.147233 99.9239662 100.595643 99.8419829  
99.7280505 99.6302689 99.7394505 100.167211  
99.5701599 98.740475 99.4713789 100.085807  
99.8507589 98.7943195 99.6980805 100.207526  
99.8018472 99.0434183 100.823102 99.6286367  
100.44671 99.9179835 100.715965 99.7632802  
100.60031 99.5541252 99.7929436 99.4610075  
99.9906294 99.4904908 99.2696812 99.1786035  
100.37892 99.7542744 99.7003536 99.2339655  
100.469021 100.080605 101.076929 99.4415247  
100.174263 100.343301 100.464411 99.7491985  
100.190567 99.4453484 99.8096128 99.9656312  
99.1724302 99.302307 99.5069905 100.120143  
99.4251409 98.5854681 101.524119 99.5923717  
100.18928 99.8282426 100.975853 99.5485836  
99.2372168 99.1451246 99.7605144 99.5659446  
99.9811902 100.307948 99.2940789 99.9096905  
100.626482 100.051235 99.5601805 99.8271297  
100.482321 99.9886884 101.171641 99.708304  
99.8288773 99.5416159 100.649439 100.281021  
99.9867679 100.052323 99.4715305 100.131717  
99.6744192 100.140976 99.298322 100.008648  
99.8048505 99.6003553 101.140121 99.3539486  
99.93614 100.627752 100.403795 99.0003649  
99.264676 99.451875 99.8749259 99.1033729  
99.5821734 99.597092 99.5942767 99.3026375  
99.9271299 99.9919517 99.2478597 99.5238926  
99.1149374 99.2598841 100.472897 99.6650946  
99.3727968 99.5095267 101.452442 100.364932  
98.9403139 99.658007 100.095718 100.52253  
98.7373731 99.4486117 99.1636043 100.432061  
99.0647386 98.8884114 100.101021 100.018871  
99.3195945 100.237787 100.613676 100.015785  
99.3848102 99.8418397 99.4744097 99.9023603  
100.290107 100.340037 99.0038827 99.8624302  
99.6400952 99.2903416 99.6924736 99.3788326  
99.6722739 100.163275 100.805221 99.5208062  
99.7906919 100.575539 100.276958 99.8836491  
99.1917375 99.8304182 99.890989 100.021572  
99.7010203 100.32916 99.4641051 100.213892  
98.6717284 99.0706125 99.5844267 99.9613874  
99.6225041 100.33623 100.980854 99.8969591  
99.4834918 101.250499 100.487748 100.120529

99.2273487 100.560854 99.7383898 100.280056  
99.5015119 100.659297 99.2286143 100.377856  
98.9918 99.9457216 100.013129 100.280828  
98.9107094 100.015339 101.058442 100.043755  
98.6017931 100.161643 100.481535 99.9642809  
98.762258 99.5508619 99.7593021 99.8614657  
99.2359297 100.240507 99.2730151 99.7441832  
98.2881573 99.5780561 99.6000351 100.035653  
98.2971673 99.1652483 101.016314 99.9909009  
98.4782266 100.613067 100.20528 100.126702  
98.4400411 99.7183781 99.8779567 99.9515495  
98.6610021 99.8423836 99.341662 99.8871213  
99.2209129 99.7123954 101.046773 99.7995452  
99.4467145 99.670191 100.846694 99.9760925  
99.434282 99.4563795 99.5207198 100.061104  
100.019467 99.7949144 99.0540131 99.6533975  
98.7920791 98.430516 99.9470937 99.2655465  
99.8634177 99.5341291 101.075196 99.4453999  
98.638602 99.4660982 100.290376 99.4507974  
98.7342036 99.0892283 99.971354 100.133777  
99.0621644 99.550327 99.151509 100.328088  
98.7016219 98.8575992 100.129197 99.9126716  
98.553718 98.7625718 101.265184 100.20356  
98.7865059 99.6340158 99.9774191 100.125681  
98.8045116 99.5206309 99.7918281 100.074212  
98.3629435 98.6837423 99.5898615 100.228427  
98.5781543 99.5470874 100.826528 99.7765768  
98.6158805 99.723104 100.394999 99.7490108  
98.34751 98.6103121 99.4811452 99.8463591  
98.6630383 99.9293565 99.3328544 99.8702624  
98.1987487 98.7550128 99.8101749 100.138789  
98.205608 98.8635384 101.097485 100.053971  
98.3479387 99.5816428 100.620619 100.353534  
99.2422213 99.7036665 99.5837964 100.323655  
99.7245166 99.9574328 99.2350553 100.036236  
99.6580671 99.2350089 100.834261 99.2719079  
100.301127 100.361299 100.040951 99.8995633  
99.9830269 99.2458075 99.339526 100.448569  
99.6735005 98.8905348 100.109789 100.189102  
100.29684 99.9720108 100.655645 100.281824  
99.6237705 98.0606653 99.4323215 99.761348  
99.0132919 98.0223304 99.808507 99.1471865  
100.280978 99.3915881 100.672627 99.4108943  
99.5830433 98.5752168 99.5402796 99.4128219  
100.182804 99.4617787 99.1577257 99.4363397  
99.1586235 97.5353152 100.755718 99.0922474

|            |            |            |            |
|------------|------------|------------|------------|
| 100.794998 | 100.047601 | 100.070215 | 99.7343604 |
| 100.02847  | 99.2447276 | 99.6218547 | 100.073248 |
| 98.9138318 | 98.009912  | 99.6756821 | 100.139946 |
| 100.008749 | 98.6977805 | 100.040496 | 100.594302 |
| 99.7729605 | 100.215518 | 99.7866728 | 100.940515 |
| 98.648891  | 98.5827758 | 99.9078224 | 101.105525 |
| 99.7858217 | 98.5223038 | 101.090207 | 100.799023 |
| 99.4162764 | 98.5919545 | 100.03625  | 100.619748 |
| 101.378468 | 99.9185579 | 99.188051  | 100.804613 |
| 102.637151 | 101.617712 | 98.7613738 | 100.539941 |
| 100.690822 | 99.1324226 | 100.34572  | 100.953238 |
| 98.9768518 | 97.6476203 | 99.6556674 | 101.12538  |
| 100.662099 | 99.9012802 | 99.6232193 | 101.064851 |
| 100.483328 | 99.9714709 | 99.2696261 | 100.666205 |
| 100.741838 | 100.347801 | 101.119319 | 100.578302 |
| 100.656954 | 100.27977  | 99.8911435 | 100.687988 |
| 100.816862 | 100.43041  | 99.3031356 | 100.617434 |
| 100.066625 | 98.8683977 | 100.818795 | 99.77889   |
| 100.110782 | 99.6647917 | 100.291589 | 99.5167244 |
| 100.157082 | 98.9180711 | 99.4298954 | 99.3008232 |
| 99.8415536 | 99.2350089 | 99.8212437 | 98.6548548 |
| 100.657383 | 100.713872 | 100.757993 | 98.6307587 |
| 99.5285976 | 99.3051996 | 99.3546886 | 98.7876726 |
| 100.337568 | 100.251694 | 100.131775 | 98.789793  |
| 100.501334 | 101.084263 | 100.460198 | 98.9503695 |
| 99.9633064 | 99.4768967 | 99.4957014 | 99.050031  |
| 101.565384 | 101.981083 | 100.462776 | 99.1421745 |
| 99.7759615 | 100.535696 | 99.5716663 | 99.1294517 |
| 100.841298 | 101.687362 | 99.2835758 | 99.2578358 |
| 100.516338 | 101.839622 | 100.671869 | 99.6281447 |
| 100.88374  | 101.126917 | 99.4311084 | 100.009249 |
| 101.044934 | 101.222484 | 99.7546796 | 100.041827 |
| 101.134105 | 101.720838 | 100.417439 | 99.8239979 |
| 99.593761  | 100.059479 | 99.0371826 | 99.8367206 |
| 101.588963 | 102.700268 | 100.179386 | 100.347365 |
| 101.9778   | 103.687796 | 100.063998 | 100.792083 |
| 100.532629 | 100.476844 | 99.5333048 | 101.009141 |
| 100.869164 | 100.640442 | 100.602879 | 100.667362 |
| 100.998205 | 100.57835  | 99.2535537 | 100.151705 |
| 100.799285 | 100.090255 | 99.579096  | 99.8991777 |
| 101.139249 | 100.552973 | 100.899309 | 99.4972547 |
| 100.343141 | 100.169625 | 99.4030575 | 99.6102172 |
| 99.917006  | 99.7333626 | 99.8035034 | 99.6086751 |
| 100.498333 | 100.531916 | 100.90219  | 99.92231   |
| 101.719719 | 102.037236 | 99.2735684 | 100.082115 |
| 100.012179 | 100.309466 | 100.888695 | 99.7977813 |

99.8552722 100.439589 99.9429998 99.7042884  
100.167371 100.73061 98.9592465 99.9317557  
100.065339 99.9207177 100.019874 99.7808177  
100.828437 101.693302 100.242917 100.006164  
100.05162 100.720351 99.140137 100.080188  
99.7116554 99.8813029 100.422443 100.067079  
99.3536851 100.05678 100.336471 100.447991  
99.4304237 99.8413482 99.9393608 100.454159  
100.201239 100.435269 101.237588 100.041056  
100.978913 101.005973 99.5345178 100.183512  
100.649666 101.110179 100.346175 100.125874  
100.653525 100.858033 100.695826 100.688373  
99.5740405 100.88071 99.5117738 100.88519  
100.707542 100.640442 101.165868 100.100043  
100.381296 101.692762 99.9138875 100.293968  
100.91032 100.567012 99.832464 100.134934  
99.9311534 100.589149 100.812123 99.9192257  
99.6241992 100.298127 100.119342 100.012333  
99.9954594 99.9876687 99.59532 99.4812549  
98.9146893 100.770025 100.664136 99.3960511  
100.530691 99.6625357 99.5965284 99.496716  
99.3426956 99.9907471 99.499365 99.7261185  
100.009997 99.5255102 101.061861 99.5566604  
100.774171 100.344956 99.4904217 99.153765  
101.061764 100.395325 101.060648 99.1898853  
101.221346 100.512311 99.9668405 99.7391833  
100.90521 100.386117 99.7565978 99.5779867  
99.6112595 101.205563 100.535724 99.8146902  
101.156475 101.078286 99.2888192 99.8385142  
99.9490186 101.392957 100.095078 100.165134  
101.065224 100.956967 100.69261 100.365141  
100.856773 101.271097 99.4923923 100.251977  
100.052379 100.78907 100.962121 100.203944  
101.162097 101.615015 99.7038476 99.749174  
101.426336 101.45795 100.742935 99.7945166  
101.861834 101.666467 99.4072038 99.4532947  
101.572079 101.744458 100.140552 98.8915083  
100.632754 102.909446 99.8663424 99.4519498  
100.976135 100.979173 99.4096291 100.107688  
100.275966 100.365536 101.106729 100.31903  
100.948024 100.497688 100.557854 100.296743  
99.6056374 99.8125598 99.2434965 100.42643  
100.496958 99.6527869 99.8986291 99.7991277  
99.6774274 99.6289563 101.018509 99.6135307  
100.723572 99.4318128 100.223012 99.4740447  
100.6933 99.3077857 99.5099757 99.5093965

99.8646869 99.5049292 99.3194385 99.6235214  
100.384083 98.9151236 101.208136 99.3299476  
98.8522746 98.8111358 100.620457 99.8402434  
99.7924645 98.6784431 99.471171 99.6189103  
98.5962523 98.9427453 99.3594558 100.025072  
100.396193 99.6284147 100.703372 99.7507111  
98.6905308 99.7215704 100.407031 100.203944  
99.9252328 99.0061129 99.6503396 100.184155  
98.9703389 99.3159098 99.3088278 100.235646  
99.6086647 99.3034529 100.144948 100.055044  
99.4010791 99.6311227 100.671388 100.274264  
100.158334 100.113149 99.4814785 99.9772317  
98.8972514 99.6229987 99.2146961 100.061384  
99.9442614 99.1366392 100.480245 99.6974912  
98.8310835 100.231219 100.092198 99.7572435  
99.7764631 99.6078338 99.1830157 100.14131  
99.9987527 99.1826755 100.102051 99.9347711  
99.0827811 99.7475674 100.261362 99.9585951  
100.18385 99.0754381 99.6573123 100.070222  
99.4300545 99.9918303 100.517989 99.8104633  
99.6506143 99.9457941 99.9221241 99.8519633  
100.877532 100.053031 99.180742 99.5954705  
99.720242 100.62009 99.7806991 99.56204  
100.528528 100.567013 100.202246 99.9801136  
101.33941 100.551848 99.3126174 100.14035  
98.9344439 99.7389017 100.863745 100.391655  
100.481389 100.403449 100.435225 100.377245  
98.80946 100.246384 99.3402051 100.560921  
100.555342 99.813643 100.894061 100.306349  
99.3682113 100.84323 99.9635057 100.489257  
100.465388 100.041658 99.3402051 100.420474  
99.6376402 99.6939487 100.222861 99.8481207  
100.625402 100.860562 100.393541 99.6292853  
98.962122 99.6961151 99.340963 100.181849  
100.547557 99.9057155 99.386892 100.026417  
99.0897006 100.641212 100.792956 100.138428  
100.074435 100.591926 99.5801576 100.459669  
100.020376 100.416447 99.2654757 100.421435  
100.831258 99.9647502 100.759912 99.9030697  
99.294259 100.398574 99.3339903 100.095391  
100.307104 99.8369319 99.5775808 100.233532  
99.3275591 99.4675586 100.461449 100.064843  
99.0006118 99.4161063 99.5627258 100.103076  
99.972372 99.7389017 99.1014652 100.121137  
99.8569025 99.8293494 99.9689626 100.112491  
99.907069 100.056281 100.859955 100.382817



|            |            |            |            |
|------------|------------|------------|------------|
| 100.597724 | 99.8131014 | 99.968811  | 100.257741 |
| 98.7510766 | 99.6549533 | 99.5839471 | 100.119023 |
| 99.1766271 | 99.3706117 | 100.976369 | 100.444106 |
| 100.170876 | 100.171643 | 99.994125  | 100.463703 |
| 99.2613912 | 99.6078338 | 99.1419373 | 100.632009 |
| 100.68292  | 99.8650952 | 99.4840553 | 99.9705071 |
| 99.0520757 | 100.343872 | 100.801293 | 99.9368845 |
| 99.6705079 | 100.209555 | 99.8883216 | 100.834321 |
| 98.9690415 | 100.284296 | 98.985051  | 100.830671 |
| 100.514689 | 100.344414 | 99.6601923 | 100.442761 |
| 98.5062985 | 99.7432346 | 100.711254 | 100.223157 |
| 99.7794903 | 100.562138 | 100.15086  | 100.456402 |
| 100.093896 | 99.7416098 | 99.6318467 | 100.164942 |
| 100.316186 | 99.9837063 | 99.8437568 | 99.8606091 |
| 100.746061 | 99.6533285 | 101.420804 | 99.9818428 |
| 101.097659 | 100.285379 | 99.6072906 | 100.156488 |
| 99.3344787 | 99.9793735 | 100.012618 | 99.9514863 |
| 101.395198 | 100.440819 | 100.800232 | 99.6873084 |
| 100.082652 | 100.527476 | 99.2297026 | 99.2444501 |
| 100.118547 | 100.725161 | 99.4690488 | 99.7789541 |
| 101.130959 | 99.527135  | 100.809933 | 99.551665  |
| 99.3262617 | 99.7632739 | 99.8049521 | 99.6661741 |
| 100.594696 | 99.0873533 | 99.7341638 | 99.8565744 |
| 98.9448231 | 98.4731755 | 100.504346 | 99.7983592 |
| 100.270776 | 99.0526907 | 100.531025 | 99.4780794 |
| 99.2025753 | 99.0624396 | 99.2844233 | 99.8759795 |
| 100.195094 | 98.3150274 | 99.458135  | 99.5226535 |
| 99.2151169 | 98.962243  | 101.001532 | 99.7599333 |
| 100.184282 | 98.7916381 | 100.158742 | 100.001824 |
| 97.1808538 | 99.06769   | 99.0983612 | 100.263782 |
| 99.0362539 | 99.1443249 | 99.7469361 | 100.093966 |
| 99.210518  | 99.122041  | 100.859385 | 99.8415565 |
| 97.39185   | 99.5834808 | 99.959084  | 100.113649 |
| 98.9649252 | 99.4535819 | 99.3485713 | 100.246801 |
| 97.8475848 | 99.9905695 | 99.8109293 | 100.286939 |
| 99.2844094 | 99.8606707 | 101.20513  | 100.403109 |
| 99.1665249 | 100.30961  | 99.4996072 | 100.340586 |
| 99.6799206 | 100.556907 | 99.6711149 | 100.087019 |
| 99.9656624 | 101.040087 | 100.321206 | 100.257221 |
| 99.3471957 | 99.4840185 | 98.4505446 | 99.8319078 |
| 98.6843088 | 99.1709569 | 99.308841  | 99.8238029 |
| 99.5180429 | 99.6655507 | 100.308165 | 100.431283 |
| 99.4407346 | 99.9367621 | 99.1129189 | 100.697008 |
| 99.2839823 | 99.2215033 | 100.896234 | 100.822247 |
| 99.667107  | 99.4552125 | 99.285943  | 100.547067 |
| 98.3464585 | 98.8144145 | 99.4055889 | 100.093001 |

98.975176 99.1861751 99.5523788 100.172699  
97.9953676 98.3725411 98.7656576 100.181383  
98.8816372 99.3122694 99.7017467 100.137964  
98.9709049 98.8660479 99.2917054 100.756444  
97.6652055 98.536681 99.7106936 100.901367  
99.0969046 98.8877883 99.6380568 101.099743  
99.3583008 98.9997513 99.0357329 100.653782  
98.6872986 99.793819 100.41022 100.385935  
99.5833919 99.4073836 99.1250503 100.364322  
98.1730486 99.5476091 98.9059269 100.476053  
98.4007025 98.7888695 100.425991 100.643554  
98.4575092 98.6317952 98.8073593 100.753742  
99.9695065 100.583539 99.9589323 100.640852  
100.10832 100.39331 100.357752 100.979907  
98.6215224 99.5823937 98.9674938 101.285963  
98.5758208 98.9203989 100.944608 101.461375  
100.176659 100.472663 100.225671 100.295623  
99.5808292 99.8019717 99.2616802 100.624064  
99.2280298 100.045464 99.7736252 100.829773  
99.7042663 99.851431 100.306042 100.677903  
99.3343822 99.8856722 99.5235667 100.790407  
99.6320834 99.7851229 100.512731 99.9886023  
98.0684047 99.7313154 99.4019495 100.33827  
100.084828 100.477011 100.821171 99.3469656  
98.5732581 100.022093 99.599388 99.5702359  
100.417126 100.771593 99.7561863 99.4222252  
99.3433517 101.124331 100.513792 100.22596  
100.450014 101.361301 99.8852341 99.5850948  
98.1375978 100.979757 100.791753 99.8023829  
100.054503 101.206401 99.6410897 99.7591568  
99.5376903 101.746106 100.697128 99.779998  
100.913864 101.472177 99.6150072 99.7037735  
101.779205 101.889592 100.556404 99.6806167  
101.089837 101.771107 100.322268 99.9444113  
100.508956 102.580393 99.4756477 100.277676  
101.605368 102.106453 100.521526 99.5355006  
100.466672 101.655883 99.4430446 100.483  
100.171106 101.132483 100.026413 100.085668  
100.497424 101.425979 100.092226 99.8548717  
100.288564 100.867251 100.047795 100.278448  
100.051513 100.214496 100.01231 100.016004  
99.9793302 100.182972 99.7439033 100.451546  
100.093371 99.2220468 100.795089 99.4542588  
99.9353371 99.5813067 99.8323108 99.8458019  
99.8704152 99.5970685 101.382855 100.350813  
100.097642 99.6628332 99.6971974 100.73483

100.366726 99.2785718 99.7375343 100.151858  
99.7879814 99.0769297 100.813741 100.114614  
100.044252 99.1840011 99.6441225 100.018706  
99.6051749 98.8763746 101.204069 100.030863  
100.177086 99.8275166 99.7467845 100.348884  
100.722515 100.041116 99.6918899 99.8400127  
100.642217 99.931327 100.461172 99.6620912  
100.620861 100.182972 99.9797073 99.488994  
101.906913 100.68137 101.30203 98.842726  
101.811666 100.710176 99.7175175 99.1161694  
99.9524218 100.231888 100.494988 99.4826259  
101.926561 100.693328 100.380953 99.7689985  
101.611775 101.00802 99.5363047 99.2796179  
100.907457 100.322654 101.51903 99.6175144  
100.719526 100.596583 100.294669 99.4936254  
100.438055 99.8150159 100.220212 100.24024  
101.155186 100.686262 100.920042 99.3544916  
101.11461 100.069378 99.4130194 99.6684593  
100.576868 99.6693553 100.366092 98.8002719  
100.453858 99.3997745 100.491349 99.2199891  
101.072752 101.149332 99.8345855 99.3137742  
101.616046 100.348742 101.080328 99.7915764  
102.028215 100.234605 100.013675 99.3606667  
101.381985 100.478641 101.482939 100.032793  
100.59737 100.37157 99.6692952 99.4226112  
100.96939 100.135687 98.8008387 98.7609053  
100.017344 99.8970859 100.066144 99.0557687  
101.149633 100.477011 100.893505 99.1659565  
100.716536 100.294935 99.6203147 100.265326  
100.649051 99.8133854 101.11005 100.139314  
100.009228 99.3514021 99.4618483 100.373005  
100.794271 99.1274761 99.5282677 99.1466592  
99.8230051 98.2323156 99.7853017 99.0723644  
100.192462 98.3078634 99.6520079 98.9332306  
100.229621 98.2703613 100.269799 99.5702359  
100.848515 98.7921306 99.2506103 99.3431061  
99.7862729 98.4845041 100.205655 99.7487363  
99.3213502 99.0970051 99.7399575 100.134013  
99.4563975 99.2341413 99.4404284 99.9798074  
99.4892553 99.1515859 99.6316073 100.059619  
99.6640778 99.5342597 99.7009793 100.215099  
99.2999691 99.4983793 99.9515537 100.197894  
99.7664244 99.8585518 99.6118862 100.088771  
99.6164418 99.4267705 99.9322965 100.232304  
99.3487056 99.3594187 99.6378717 100.106772  
99.7307367 99.6484385 99.7336932 100.357835

99.1957359 99.2604435 99.8051533 100.269581  
99.8738019 99.6086052 99.5937892 99.881517  
99.6546449 99.484088 99.4355561 99.9340872  
99.6996083 99.5129747 99.7977288 100.003384  
99.3792052 99.139119 99.9362408 99.9070056  
99.7261775 99.5978106 100.16663 100.084948  
99.2774874 99.3249066 99.8325308 100.101356  
99.5417649 99.5298507 99.8589804 99.9085986  
99.3829783 99.5664913 99.4968076 99.7969267  
99.5279301 99.6266974 99.7965688 100.015014  
99.4911419 99.4228176 99.9856596 99.7806778  
99.6544877 99.5362362 99.9448253 99.7908732  
99.4199237 99.1581235 99.9464494 100.131465  
99.4724334 99.6190956 100.240642 99.9396629  
99.220733 99.4652355 99.9063111 99.8829507  
99.6274468 99.710317 99.8573563 100.02951  
99.2293798 99.3916503 99.6346235 99.9885691  
99.4521527 99.6031319 99.6181506 100.122066  
99.4829667 99.4319397 100.424165 100.147554  
99.4760493 99.42449 100.72323 99.8861368  
99.2985541 99.2355096 100.436693 100.245207  
99.450895 99.4184086 100.305142 99.9949413  
99.4832812 99.3124397 99.8963345 99.9978087  
99.8857502 99.8088362 99.3666482 99.9611689  
99.7005516 99.7127496 99.2622422 99.9036602  
99.7060541 99.6399245 99.539034 99.7942186  
99.7371825 99.6932891 99.4954155 99.8404167  
99.9997307 99.8489736 99.7928566 99.8716402  
99.6411245 99.6397725 99.7077077 99.8408946  
100.006963 99.8320976 99.8313708 99.7696858  
99.8384287 99.7717395 99.9065431 99.8875706  
99.7725558 99.6758049 100.238554 99.9230953  
100.079596 99.8964087 100.05596 100.04321  
100.074879 99.8235836 100.06408 100.137199  
100.028187 99.9511416 100.015125 99.9237325  
100.259606 99.9281842 100.251779 100.163007  
100.13918 99.7328183 100.100274 99.8999962  
100.177383 99.9260557 100.428573 100.020111  
100.187288 99.9395868 99.9148956 99.9753469  
100.21653 100.176915 99.8387952 100.023935  
100.222346 100.035673 99.9341527 99.982197  
100.065761 100.171289 100.067792 100.186106  
99.7488164 99.6771733 100.093778 99.7230098  
100.103807 99.9052268 100.105842 99.9105103  
99.6941058 99.8203909 100.123475 99.9202278  
100.054441 99.8916956 100.344352 100.009279

99.8148465 99.7241523 100.111875 100.245048  
100.08557 99.8664577 100.239946 99.657536  
100.369971 100.360118 100.370338 99.8213002  
100.042965 100.059239 99.7102598 100.232144  
100.201594 100.370152 99.6014456 100.303353  
99.9778779 99.9893025 99.9536418 100.085266  
100.116069 100.165816 100.446206 100.187062  
100.218102 99.9964482 99.8854299 100.085107  
100.470274 100.53131 99.9543378 99.8232119  
100.4654 100.438568 99.817682 100.256677  
100.407073 100.24305 100.077305 100.039706  
100.361953 100.327582 99.8898381 99.95177  
100.233194 100.192118 99.9100233 99.784979  
100.299067 100.308882 100.124404 100.059619  
100.319348 100.202152 99.7336932 100.023297  
100.408017 100.401471 100.049927 99.8335666  
100.455653 100.207018 100.171966 100.123499  
100.47106 100.449971 100.26802 99.7269924  
100.293565 100.428077 100.150853 100.185309  
100.214014 100.172049 99.7457579 100.00434  
99.8176764 99.9862618 99.9197678 100.227047  
100.226748 100.273457 99.957586 100.060096  
100.106008 100.177827 100.396555 100.123021  
100.346703 100.154261 100.053872 99.924529  
100.425153 100.786578 100.316975 100.171609  
100.057743 100.001617 99.9719708 100.113782  
100.375788 100.561109 100.180087 99.831177  
100.017182 100.307209 100.30955 100.02266  
100.220932 100.468671 100.183567 99.9756655  
100.292779 100.354188 100.144125 99.9261221  
100.181785 100.243962 99.9780032 100.111552  
100.258663 100.520819 99.9374008 100.136562  
100.46147 100.601094 99.9490015 99.9814004  
99.9969009 100.338072 100.159206 100.215577  
100.467758 100.61873 100.443886 99.9301046  
100.275013 100.608696 100.248299 100.131942  
100.536933 100.686842 100.030902 99.8010686  
100.868341 101.196314 100.343656 99.9616468  
100.405501 100.489044 100.262915 100.191044  
100.468544 100.605351 100.094938 100.029351  
100.357236 100.678936 100.119763 99.8810391  
100.470116 100.806798 99.8738292 100.010872  
100.416349 100.673159 100.03299 99.7948558  
100.909059 101.113606 100.202592 99.6623151  
100.759077 100.999123 100.252939 100.108206  
100.552252 100.683726 100.030719 99.8595195

|            |            |            |            |
|------------|------------|------------|------------|
| 100.410935 | 100.711844 | 100.177746 | 100.369731 |
| 100.235979 | 100.586    | 100.276769 | 99.8977376 |
| 99.965764  | 100.28963  | 99.7869873 | 100.030068 |
| 100.450391 | 100.794979 | 99.806931  | 99.9268788 |
| 100.046404 | 100.493138 | 99.9838739 | 100.198546 |
| 100.25217  | 100.405899 | 100.082201 | 99.8561754 |
| 100.485759 | 100.490554 | 100.110726 | 100.129116 |
| 99.89094   | 100.13263  | 99.9567411 | 100.048062 |
| 100.154553 | 100.377325 | 99.9405078 | 100.048062 |
| 100.239123 | 100.128831 | 100.216242 | 99.8537868 |
| 100.29807  | 100.383861 | 100.109566 | 100.012073 |
| 100.170901 | 100.399515 | 99.9996434 | 99.7198643 |
| 100.545335 | 100.584784 | 100.254042 | 99.8219384 |
| 100.454163 | 100.76975  | 99.7452445 | 100.217336 |
| 100.392072 | 100.502713 | 100.100522 | 99.7109467 |
| 100.222775 | 100.699229 | 100.115364 | 100.013347 |
| 100.505723 | 100.794979 | 100.097739 | 99.8996485 |
| 100.209413 | 100.632356 | 100.272363 | 100.207622 |
| 100.585262 | 100.667008 | 100.013094 | 99.6526642 |
| 100.524114 | 100.796499 | 100.63367  | 100.066534 |
| 100.481986 | 100.740417 | 100.034197 | 100.094083 |
| 99.9008432 | 100.343433 | 99.9439864 | 100.103319 |
| 99.9906005 | 100.188409 | 99.7141693 | 99.9628675 |
| 100.020782 | 100.022745 | 99.7916253 | 99.9983785 |
| 100.063695 | 99.9602797 | 99.6357857 | 100.10093  |
| 100.094034 | 99.5974925 | 99.8850827 | 99.9963083 |
| 99.8349792 | 99.6797161 | 99.5087022 | 100.258739 |
| 99.8719196 | 99.8566262 | 99.8556309 | 100.033412 |
| 99.863274  | 99.987333  | 99.7109227 | 100.233738 |
| 99.9506734 | 99.9213717 | 99.8904165 | 99.8910494 |
| 99.5389844 | 99.5254517 | 99.751274  | 100.347278 |
| 99.6754281 | 99.5404982 | 100.0175   | 99.7792615 |
| 99.7233721 | 99.7236397 | 100.038371 | 100.267497 |
| 99.64116   | 99.5363946 | 100.185862 | 99.8623858 |
| 99.8365512 | 99.6063076 | 100.559228 | 100.020035 |
| 99.9129471 | 99.7151285 | 100.233867 | 99.8058549 |
| 99.7359475 | 99.8818557 | 100.465307 | 100.180711 |
| 99.7175559 | 99.7231837 | 99.7740006 | 99.863819  |
| 99.7782325 | 100.015754 | 100.193515 | 100.22275  |
| 99.8683042 | 99.8008479 | 99.9878163 | 100.0401   |
| 100.055993 | 100.13719  | 100.59355  | 100.13883  |
| 99.7887644 | 99.9599758 | 100.112117 | 99.9880277 |
| 99.8398522 | 99.809207  | 100.28906  | 100.008729 |
| 99.877893  | 99.9066292 | 99.8329043 | 100.180074 |
| 99.9395127 | 99.9148363 | 100.103305 | 100.030864 |
| 99.7293454 | 99.8064713 | 100.041386 | 100.226413 |

|            |            |            |            |
|------------|------------|------------|------------|
| 99.9791254 | 100.031105 | 100.067128 | 99.917802  |
| 99.983684  | 100.160443 | 100.255434 | 100.076407 |
| 100.053478 | 100.086123 | 100.120466 | 99.8814949 |
| 99.7936374 | 99.9488809 | 100.373009 | 100.127842 |
| 100.16367  | 100.119104 | 99.8338319 | 100.06526  |
| 99.8805653 | 99.9064772 | 100.267957 | 99.9568163 |
| 99.9761387 | 100.084603 | 100.257057 | 99.9679633 |
| 99.6320428 | 99.6371604 | 100.160585 | 100.159054 |
| 100.107867 | 99.6940027 | 99.9882801 | 100.154276 |
| 99.9674931 | 99.8107269 | 100.097507 | 100.173067 |
| 100.181276 | 99.8950783 | 99.8164391 | 100.169404 |
| 100.013079 | 100.159532 | 99.7932487 | 100.058572 |
| 99.7985104 | 99.780026  | 99.8271067 | 100.161442 |
| 100.194166 | 100.022593 | 99.8315129 | 100.131982 |
| 100.11384  | 100.009979 | 99.952335  | 100.263198 |
| 99.8914116 | 100.175186 | 100.267725 | 100.062871 |
| 100.072341 | 100.036424 | 100.177282 | 100.328806 |
| 100.078943 | 100.131718 | 100.076636 | 100.087872 |
| 99.9762959 | 100.044327 | 100.101681 | 100.167334 |
| 99.6993215 | 99.8858073 | 100.202791 | 100.05698  |
| 100.009464 | 99.9511606 | 99.8662985 | 100.066534 |
| 100.129559 | 100.024873 | 99.8973737 | 99.9106362 |
| 99.826648  | 99.8203019 | 99.9551178 | 99.8590418 |
| 99.9895002 | 99.9949322 | 100.079882 | 99.9302229 |
| 99.8921976 | 99.8110308 | 99.9463054 | 100.005067 |
| 99.8239757 | 99.7766823 | 100.0175   | 99.9142987 |
| 99.7914367 | 99.7206    | 100.033501 | 100.253166 |
| 99.803069  | 99.4616182 | 100.000107 | 99.9424845 |
| 99.7928515 | 99.5497693 | 100.294626 | 100.056024 |
| 100.128931 | 99.8994859 | 99.7280836 | 99.7458207 |
| 99.9434426 | 99.9484249 | 100.317352 | 99.9211461 |
| 100.184734 | 100.010891 | 99.7535931 | 100.031023 |
| 99.877107  | 99.9934124 | 100.198153 | 99.952676  |
| 100.26616  | 100.251482 | 99.5026727 | 99.8982153 |
| 100.122643 | 100.047063 | 99.9748297 | 99.8157279 |
| 100.136319 | 100.206495 | 99.4913094 | 99.8427991 |
| 99.9736237 | 99.9437134 | 99.7559121 | 99.8284673 |
| 100.112582 | 99.7886891 | 99.9405078 | 99.8845205 |
| 100.074856 | 99.8776001 | 99.9476969 | 99.8448692 |
| 100.20454  | 99.7655874 | 99.5144998 | 99.7125392 |
| 100.243682 | 100.143269 | 99.6740499 | 99.7587193 |
| 99.9667072 | 99.9041974 | 99.7431574 | 99.8467801 |
| 100.132074 | 100.043111 | 100.011471 | 99.5575967 |
| 99.8329357 | 99.9104288 | 100.267493 | 99.8584048 |
| 99.8661035 | 100.066365 | 99.8686175 | 99.6818055 |
| 99.6163235 | 99.7262234 | 100.257289 | 99.9705111 |

99.9010004 99.6836677 99.7784068 100.038348  
99.8532137 99.8447714 100.141569 100.066375  
99.877893 99.780178 99.7742325 99.9673263  
99.6862745 99.6066115 100.089854 100.061757  
99.9038299 99.5854857 99.3876482 99.8773546  
99.8164304 99.5754547 99.5256312 100.038667  
100.026704 99.650634 99.5053266 99.7919815  
100.026861 99.6964563 99.7871568 99.965748  
99.8129668 99.5366851 99.6723371 99.848364  
99.9646716 99.9208643 99.7284712 99.84486  
99.8198768 99.4652205 99.9949921 100.022131  
99.902011 99.6623172 100.160843 100.05733  
99.8409207 99.5812936 99.9926725 100.210869  
99.6344075 99.3961836 100.062724 100.032324  
99.7240798 99.4109014 100.158987 100.089662  
99.8572533 99.55641 100.151101 100.301973  
100.07366 99.6753659 99.6233937 100.30038  
99.7259643 99.4435232 99.9344508 100.328412  
99.8863065 99.3641687 99.6215381 100.109571  
99.8663619 99.4165154 100.134863 100.205772  
99.8239599 99.4077151 100.056461 100.031368  
100.541181 99.9431685 100.529426 100.184429  
100.198354 100.105519 100.617338 100.498037  
100.387749 100.340093 99.7303269 100.041562  
99.926824 100.151948 99.5220276 100.340198  
100.189245 100.231151 99.2733675 100.134258  
100.152026 100.430979 99.7484197 100.108456  
99.9536785 99.930575 99.2896047 100.150504  
100.273578 100.151948 99.5841927 99.8490011  
99.8635351 99.5797763 100.002647 100.32889  
99.8267867 99.4281985 99.6551721 99.6175779  
99.9346762 99.7516859 100.200972 99.9627218  
99.930593 99.6712692 99.5802494 100.014008  
100.232118 100.052262 99.9583426 99.8775109  
100.135065 99.9078155 100.236461 100.095555  
99.9005976 99.5897905 99.9543993 99.8032899  
100.005032 99.8959806 100.125817 99.9933022  
100.253162 99.9219264 99.5129812 100.105112  
100.11779 99.791439 99.7815898 100.043792  
99.7185832 99.5680932 99.6222339 99.8145982  
99.9048378 99.8612346 99.8669507 100.189048  
99.9393875 99.5618722 99.9467446 99.9018796  
100.154538 99.9926323 100.052518 99.8990127  
99.8492441 99.778542 99.7799661 100.169139  
99.9100202 99.8689728 100.117698 99.9958505  
99.7941215 99.7709555 99.853961 100.067842



|            |            |            |            |
|------------|------------|------------|------------|
| 99.958861  | 99.6823455 | 99.740765  | 99.913188  |
| 99.7715071 | 99.6366749 | 100.044863 | 99.8044048 |
| 99.9136322 | 99.6404681 | 99.8806363 | 100.024042 |
| 100.087637 | 100.103395 | 99.5489349 | 99.9343713 |
| 99.9651428 | 99.8481858 | 99.6776722 | 100.00031  |
| 100.043665 | 100.009626 | 100.111204 | 99.997284  |
| 100.057485 | 99.9314853 | 100.324374 | 99.8540978 |
| 99.8528561 | 99.8446961 | 100.377261 | 99.8857931 |
| 100.024191 | 99.7850664 | 100.246204 | 99.8824484 |
| 100.218298 | 100.307168 | 100.071075 | 99.7459517 |
| 100.220654 | 100.124334 | 99.8646311 | 99.9612884 |
| 100.001263 | 100.044524 | 99.8804044 | 99.8808556 |
| 99.838251  | 100.002495 | 99.9736519 | 100.123587 |
| 99.7652254 | 99.8847527 | 100.098214 | 99.9389902 |
| 99.8227036 | 99.9575828 | 99.6280329 | 100.270277 |
| 99.8726437 | 99.9454445 | 99.8739095 | 99.7787619 |
| 99.6158762 | 99.8662416 | 99.8347084 | 100.071027 |
| 100.168201 | 99.9826182 | 100.019348 | 99.7661793 |
| 99.6870173 | 100.067587 | 100.270328 | 100.000469 |
| 99.9973369 | 99.8017566 | 100.033729 | 99.9904353 |
| 99.9254106 | 100.057269 | 99.9024405 | 100.008433 |
| 100.391204 | 100.238738 | 100.02074  | 99.7700019 |
| 100.386964 | 100.306106 | 100.101461 | 99.9123916 |
| 100.553588 | 100.484084 | 100.020508 | 99.8942346 |
| 100.287869 | 100.322796 | 100.060405 | 99.6307975 |
| 100.231961 | 100.227054 | 100.227879 | 100.094122 |
| 100.038954 | 100.136927 | 100.048575 | 100.134577 |
| 100.027332 | 100.082001 | 100.023987 | 100.262314 |
| 100.022621 | 100.247993 | 99.6486773 | 100.093644 |
| 99.8390362 | 99.9961221 | 99.6345278 | 100.165635 |
| 100.150769 | 100.156348 | 99.5941669 | 99.8819706 |
| 99.9946671 | 100.166059 | 100.145302 | 100.212939 |
| 99.7812439 | 99.7671623 | 100.052286 | 99.9582622 |
| 99.6028415 | 99.706167  | 100.322518 | 100.176466 |
| 99.8792395 | 99.9150986 | 99.9488323 | 99.7435626 |
| 99.7898813 | 100.082456 | 100.076874 | 100.112757 |
| 99.799304  | 100.072139 | 99.9040642 | 99.9023575 |
| 99.7828143 | 100.197771 | 100.222776 | 99.9708447 |
| 99.6994238 | 99.7211882 | 99.8699662 | 99.7430848 |
| 99.8734289 | 100.108554 | 100.223936 | 99.9751451 |
| 100.084653 | 100.116444 | 100.15574  | 99.7550302 |
| 100.136164 | 100.298367 | 100.254786 | 100.066249 |
| 100.235887 | 100.471946 | 99.9975437 | 100.021334 |
| 100.292266 | 100.568749 | 100.080817 | 99.8926418 |
| 100.020736 | 100.546749 | 100.045327 | 100.042358 |
| 100.003933 | 100.279705 | 100.284709 | 99.7631531 |

99.6747678 99.9798871 100.345946 100.006522  
100.354927 100.484843 100.185431 99.8386484  
99.8514427 100.334024 100.378652 99.9606513  
100.03864 100.418385 99.8423631 99.9010833  
99.9327916 100.028137 100.188446 99.9907538  
100.127841 100.242076 100.285173 100.161016  
100.012256 100.143148 100.804993 99.9647924  
100.138677 100.315209 100.467725 99.90618  
100.014141 100.260738 100.249683 99.8160317  
100.107111 100.381819 100.141126 99.9421756  
100.342834 100.684367 100.084992 99.9276818  
99.8181493 100.236462 100.249915 100.125658  
100.178723 100.530817 100.021667 99.8687509  
100.187832 100.545838 100.110276 100.056215  
99.9795909 100.143907 99.9952241 99.7298651  
100.289298 100.719683 100.289137 99.8756515  
100.506666 100.89911 99.7943344 99.9555871  
100.23106 100.504767 100.36967 99.9065429  
100.44591 100.733391 100.477124 99.9844086  
100.365636 100.642917 100.344605 100.189662  
100.237986 100.47994 100.05891 100.013867  
100.565061 100.859508 100.219512 100.048102  
100.328333 100.641089 100.382434 100.203674  
100.459131 100.659214 100.178201 99.7758115  
100.442447 100.648248 100.679966 100.187273  
100.716479 100.892408 100.773727 100.12549  
100.404514 100.682366 100.75841 100.607015  
100.129695 100.432418 99.9472775 100.160681  
99.9663149 100.270507 100.014118 100.247464  
100.022979 100.109359 99.7688052 99.9546317  
100.183526 100.110882 99.7836586 100.202878  
100.189664 100.039751 99.5214041 100.015619  
99.8810047 99.8274244 100.046377 99.9856825  
99.7673626 99.8073188 99.9089837 100.185522  
99.9365665 99.6959769 100.222297 100.195394  
99.9433347 99.3554015 100.187252 100.342527  
99.8940688 99.5930122 100.320004 99.9654597  
99.918623 99.8840854 99.8662803 100.088707  
99.8043514 99.8333646 100.239935 99.9821793  
99.8163137 99.4908092 100.080958 99.931065  
100.129538 99.7297907 100.396359 100.083293  
99.6881909 99.7811207 100.229955 99.9296319  
100.188248 100.195569 100.572047 99.8711929  
99.8514137 99.6627723 100.612661 100.085045  
100.18447 99.9377001 99.9825542 100.009249  
100.034784 100.153378 100.223689 100.29189

|            |            |            |            |
|------------|------------|------------|------------|
| 99.9036701 | 100.061075 | 99.981858  | 99.872626  |
| 100.09554  | 100.22923  | 100.155224 | 100.062593 |
| 100.057134 | 100.159622 | 100.286816 | 99.833932  |
| 100.047533 | 100.025281 | 99.9243012 | 99.8267665 |
| 100.292603 | 100.461815 | 100.077244 | 99.9783577 |
| 99.9027257 | 100.006089 | 100.35296  | 100.103675 |
| 100.210126 | 99.7660416 | 100.294475 | 100.208133 |
| 99.9076051 | 99.7898027 | 100.389165 | 100.243005 |
| 100.059653 | 99.725069  | 99.9073591 | 99.7941234 |
| 100.079642 | 100.045539 | 100.017367 | 99.9506509 |
| 100.074291 | 100.13114  | 100.103934 | 99.8434861 |
| 99.9689907 | 100.413988 | 99.8853112 | 99.9785169 |
| 99.640499  | 100.222224 | 100.025258 | 100.224216 |
| 99.8366182 | 100.144391 | 99.4761478 | 99.7546333 |
| 99.9286966 | 100.123067 | 99.9428679 | 100.175968 |
| 99.7310034 | 99.6907982 | 99.8667445 | 100.083612 |
| 99.8592836 | 99.8792113 | 100.023865 | 99.9253326 |
| 99.7542985 | 99.5639202 | 100.13805  | 100.464978 |
| 99.8460621 | 99.5741252 | 99.6335005 | 99.8539956 |
| 99.7638998 | 99.5963632 | 99.6541559 | 100.020714 |
| 99.7785379 | 99.443744  | 99.7363135 | 100.134885 |
| 99.9549822 | 99.4233338 | 100.199088 | 100.150012 |
| 100.033839 | 99.6527195 | 99.7302793 | 99.9274027 |
| 99.6242869 | 99.6090053 | 100.295635 | 100.11307  |
| 99.8662092 | 99.8706817 | 99.6803813 | 99.9301096 |
| 100.199738 | 100.101286 | 99.9003966 | 99.9238995 |
| 99.9146881 | 100.094432 | 99.8416795 | 99.6979459 |
| 99.8344146 | 100.062903 | 99.7453648 | 99.8938042 |
| 99.9930728 | 100.036857 | 99.679453  | 99.8242187 |
| 100.075392 | 100.147437 | 100.252235 | 99.8761292 |
| 100.116159 | 100.189933 | 100.048002 | 99.7735822 |
| 100.087512 | 100.093213 | 100.083743 | 99.849537  |
| 100.340295 | 100.649314 | 100.136194 | 99.9906187 |
| 100.064689 | 100.290765 | 99.7001085 | 100.267527 |
| 99.7125877 | 100.26213  | 99.8498024 | 100.021988 |
| 100.133158 | 100.502483 | 99.2419754 | 99.857021  |
| 99.6050842 | 99.8728141 | 99.6177188 | 99.9019251 |
| 100.049107 | 99.93572   | 99.1349848 | 99.712277  |
| 100.342971 | 100.183383 | 99.5186191 | 99.6796339 |
| 99.5528277 | 99.6973477 | 100.381274 | 99.7686459 |
| 99.7232909 | 99.4903522 | 100.147334 | 99.9842493 |
| 99.9266504 | 99.7779221 | 100.488264 | 100.049058 |
| 99.7492617 | 99.6050451 | 100.049162 | 100.092529 |
| 99.9057163 | 99.8650461 | 100.21928  | 100.004472 |
| 99.9235024 | 99.8962705 | 100.146173 | 100.052402 |
| 99.5523555 | 99.3112303 | 100.164972 | 100.139184 |

99.9030405 99.4438963 99.9331204 100.356221  
99.7657886 99.411301 99.8110444 100.219916  
100.144805 99.7224796 99.5506466 100.062274  
99.8607002 99.6114423 100.024329 100.190936  
99.9559266 99.6754144 100.015046 100.084726  
100.064847 99.8619998 100.091866 99.9987397  
100.08767 99.9504945 100.116234 99.6356852  
99.8392939 99.8198086 100.215798 99.9162562  
100.147009 100.051631 100.084439 100.055268  
99.8588114 99.9995398 100.096739 99.9130716  
100.391922 100.567978 99.9001645 99.974536  
100.007868 100.307824 99.8284507 100.02358  
100.36784 100.528528 99.8936662 99.9224664  
100.187775 100.353976 99.8853112 100.371826  
100.132843 100.277819 99.768109 99.990778  
99.95451 100.156728 99.6070429 99.8976258  
100.431744 100.460596 99.8170786 99.7369583  
99.9263356 100.156272 99.6894326 99.8482631  
100.06044 100.026347 99.8205599 99.8008113  
99.8542468 99.8121929 99.5026053 99.9500139  
99.7206151 99.7661939 99.8022252 99.7289966  
99.9077625 100.028937 99.4346048 99.4536802  
99.961593 100.040969 100.069586 99.57645  
99.6649616 100.130749 100.039943 99.838334  
99.4019068 99.9252098 100.442875 99.6597069  
99.3216042 100.066054 100.016111 99.7610535  
99.3985608 99.8085105 100.560703 99.7348947  
99.6554018 100.026896 99.9537441 99.7800373  
99.6402654 99.7626976 100.812396 99.7032052  
99.6550831 99.9792258 99.8283431 99.7326525  
99.5496063 99.8227497 100.883004 99.5849676  
99.8556804 99.9386751 99.7459304 99.8308601  
99.6526932 99.6930495 100.674076 99.8447616  
99.6321395 99.845811 99.995396 99.8662865  
99.6334142 99.6806676 100.351553 99.8413236  
99.487786 99.920257 99.8900413 99.5978227  
99.4065274 99.6797389 99.898728 99.6716652  
99.4944779 99.8592763 99.8993963 99.6718147  
99.5473756 99.7890091 99.7762226 99.7151635  
99.4462007 99.9236621 100.233725 99.9893075  
99.975975 99.7123962 99.7766681 100.121297  
99.5346292 99.7972121 100.674076 99.6828761  
99.5757365 100.011109 99.5494762 99.8541787  
99.6721315 99.5085594 100.13973 99.9866169  
99.9420376 99.9727253 99.8067376 99.8458079  
99.8324181 99.6972284 99.4345438 99.8111289

99.6257663 100.093758 99.7746635 99.6420684  
99.6098332 99.8055698 99.7831275 99.7885576  
99.349965 100.131832 99.7412529 99.7117255  
99.251658 99.8309527 99.5955828 99.6003639  
99.4227791 99.7596021 100.125252 99.7767488  
100.044328 99.9606529 99.4040288 100.023688  
99.781751 99.9023033 100.468044 99.8395298  
99.7462202 100.105211 99.7641948 99.9132228  
99.5242727 99.6763339 100.488759 99.6619491  
99.5330359 99.8679436 99.5109427 99.68751  
99.3456631 99.7952 100.357344 99.4945329  
99.4242131 99.9899051 99.6677496 99.8017117  
99.5707972 99.7591378 100.589659 99.6470012  
99.3609588 99.897041 99.2804097 99.6473002  
99.918138 99.6357833 100.745575 99.9549274  
99.7618346 99.7842111 99.9532987 100.176156  
100.355341 100.067756 99.6719816 100.260462  
100.088144 99.8489064 100.140398 100.021595  
100.403618 100.296666 99.4913418 100.32698  
100.632576 99.9078752 101.03892 100.194243  
100.675118 100.187551 100.390309 100.194392  
100.716384 100.274224 100.214569 100.142075  
101.007641 100.214482 100.1845 100.125333  
99.9790023 99.6546656 100.684545 99.8742089  
100.47691 100.014669 100.08605 100.046857  
100.523116 100.276855 99.8359162 100.166589  
100.216724 100.323752 100.58409 100.072119  
100.078903 100.016836 100.276713 99.9638961  
100.195214 100.396495 99.5984784 100.036543  
100.552911 100.36616 99.5617267 100.124436  
100.207004 100.10645 100.270254 99.7623988  
100.23186 100.196683 99.8777908 99.9656899  
99.9092155 100.171455 99.2841962 99.9015635  
100.044487 99.9716419 100.112556 100.21233  
99.8639656 99.8300241 100.128593 99.8492459  
100.028554 100.210303 99.5719726 99.9396806  
99.9586079 100.325764 99.6902461 99.7676306  
99.9493668 99.843025 100.298987 99.6788402  
99.9219619 99.8759918 99.6757682 99.9414743  
100.145503 100.171455 99.4038061 100.025631  
100.112362 100.061875 100.194746 99.9792924  
99.8529717 99.8784682 100.10966 99.8147164  
99.8963097 100.557924 99.4104882 100.148951  
100.237915 100.317251 99.3975694 100.363154  
100.013099 100.19173 99.8601945 100.200371  
99.9264232 100.10258 100.279386 100.020399

99.8977436 99.8106774 100.230384 100.018157  
100.194895 99.9993463 100.005419 100.293945  
100.302603 100.190337 99.956417 100.314424  
100.361874 99.7401006 100.61906 100.209639  
100.323475 99.8849687 100.156435 100.147456  
100.494277 100.429926 99.4719637 100.280791  
100.217202 100.244198 100.459357 100.32115  
100.075079 99.9377465 100.31636 99.9996215  
100.085116 100.08927 100.058431 100.022492  
100.149486 100.088186 99.8098559 100.106349  
100.204136 99.9125184 100.45958 100.04297  
99.8462799 99.9547715 99.9332523 99.9452113  
99.9641845 100.398972 99.8815773 100.148203  
99.8732067 99.8612883 100.854493 100.080041  
99.9643438 99.8023196 99.9241201 100.149997  
99.9245112 100.261068 99.652158 100.024286  
99.8663555 99.7291117 100.127925 100.094092  
99.9797989 99.9656057 99.7958235 100.14342  
100.613457 100.261068 99.8370299 100.24372  
100.325387 100.192658 100.292973 100.049398  
100.414453 99.9115897 100.113669 100.248504  
100.506865 100.156287 99.8103014 100.53924  
100.439946 100.307191 99.6185247 100.50486  
99.9656185 99.7792583 100.138616 100.137291  
100.290653 100.045933 99.3922238 100.578104  
100.346578 100.445249 99.8178745 100.240282  
100.423853 99.9564741 100.1894 100.308594  
99.9836228 99.8275477 100.139952 100.099772  
100.802264 100.183991 100.016111 100.370478  
100.483284 100.312298 99.9127605 100.182434  
100.313119 99.8337386 99.8746724 100.018456  
100.527892 100.195491 99.5096959 100.134626  
100.148124 100.093446 99.6814676 100.192185  
99.9221731 99.9602753 99.7230756 99.8314285  
100.281401 100.256347 99.4625254 100.128197  
100.190957 100.182639 99.7072779 100.135373  
99.9887322 99.8757277 99.8296542 99.914105  
100.353055 100.316583 99.3296915 100.074076  
100.407194 100.395711 100.008101 99.9764489  
100.344457 100.084619 100.188105 99.7982383  
100.199237 100.311009 99.4605229 99.8939218  
100.236657 100.077961 100.341632 100.257669  
100.496683 99.7992322 101.205386 100.044025  
100.411971 100.40748 99.6449773 100.083943  
100.213568 100.409493 99.5815641 100.302371  
100.484263 99.8659722 100.378345 100.205192

|            |            |            |            |
|------------|------------|------------|------------|
| 100.341113 | 100.120699 | 99.2527057 | 100.072132 |
| 99.7923989 | 99.855907  | 99.520376  | 99.8433889 |
| 99.4732976 | 99.8772762 | 99.5842341 | 99.5195599 |
| 99.9963753 | 100.291498 | 99.3730795 | 99.8670108 |
| 99.8549772 | 100.007659 | 99.7164005 | 99.6781853 |
| 99.6228166 | 99.9742118 | 99.3096663 | 99.8417444 |
| 100.039209 | 100.280658 | 99.3704095 | 100.179328 |
| 100.026789 | 99.5592159 | 100.499609 | 99.9783924 |
| 100.15927  | 100.028564 | 99.3975547 | 100.255277 |
| 99.9670766 | 99.8422803 | 100.481586 | 100.137167 |
| 100.192231 | 100.140675 | 99.4823281 | 100.022646 |
| 100.023286 | 99.5956055 | 100.634222 | 100.140157 |
| 100.330285 | 100.068979 | 99.5962493 | 100.174693 |
| 100.104335 | 99.6188328 | 100.794424 | 100.318518 |
| 100.261338 | 99.8768116 | 99.7088354 | 100.356193 |
| 100.325508 | 99.8171947 | 100.563022 | 100.147633 |
| 100.216275 | 100.033829 | 99.5800066 | 100.179926 |
| 100.130927 | 99.7823536 | 100.476246 | 100.126253 |
| 100.091915 | 99.9056136 | 99.6467573 | 100.153463 |
| 100.050674 | 99.5671132 | 100.564357 | 100.258117 |
| 100.195256 | 100.203853 | 99.6469798 | 100.254081 |
| 100.075036 | 99.7106584 | 100.220368 | 100.37533  |
| 100.110863 | 100.00162  | 100.102664 | 100.682713 |
| 100.135226 | 99.9921743 | 100.033244 | 100.678826 |
| 99.9414402 | 99.7719787 | 100.209243 | 100.410613 |
| 99.9567265 | 99.8806829 | 99.5895742 | 100.111153 |
| 99.7861889 | 99.6183683 | 100.065284 | 100.078262 |
| 99.9656435 | 100.054424 | 99.6038143 | 99.9801865 |
| 99.842557  | 99.6857277 | 100.64379  | 99.8788217 |
| 100.019942 | 100.094994 | 99.809629  | 99.8867455 |
| 99.8564102 | 99.7750757 | 100.681838 | 99.6548624 |
| 99.9487649 | 99.8190529 | 99.9057499 | 99.9740568 |
| 99.8283854 | 99.7777081 | 100.624432 | 99.9266635 |
| 99.8110291 | 99.8450675 | 99.8300992 | 100.045221 |
| 100.045419 | 99.7216527 | 100.215696 | 100.102034 |
| 99.9194662 | 100.092207 | 99.9506954 | 99.8819614 |
| 99.7858704 | 99.6716364 | 99.8347717 | 100.003808 |
| 99.957045  | 99.8495582 | 100.152727 | 100.392373 |
| 99.9430325 | 99.6536739 | 99.8216441 | 100.227768 |
| 99.8928744 | 99.5602998 | 100.492933 | 100.061368 |
| 100.140003 | 99.9167627 | 99.8712621 | 100.306109 |
| 99.735553  | 99.656616  | 100.867627 | 100.114592 |
| 100.021693 | 100.001156 | 99.7951663 | 99.9360824 |
| 100.000356 | 99.9014326 | 100.031019 | 100.116685 |
| 99.7398523 | 99.9940325 | 99.7215181 | 99.9157496 |
| 99.8178761 | 99.9368931 | 99.7637935 | 100.234645 |

99.6818918 99.761449 100.141825 100.110705  
100.216434 100.058759 99.6547674 100.17574  
99.9033837 99.8538939 100.819567 100.051202  
100.028381 100.142068 99.6296246 100.178431  
99.6787071 99.7585068 100.519411 99.8909317  
99.8376208 100.026241 99.671455 99.9329427  
100.034273 99.9037554 100.108672 99.7327548  
100.05338 100.197969 99.5962493 99.7859788  
99.8537033 99.8927611 99.9996459 99.9704686  
99.8400093 99.8682949 99.9248851 100.007845  
100.070896 100.033364 99.5201535 100.176637  
99.7603932 99.9548556 100.011661 99.8927258  
100.068189 100.009363 99.8730421 100.109957  
100.145735 100.055508 100.197005 100.102632  
100.166117 100.154611 99.8781597 99.9324942  
100.054177 100.07378 100.525196 99.7489014  
100.122487 100.244269 99.8681471 99.8403988  
100.044782 100.031351 100.476023 99.7711777  
99.9538603 100.139746 99.9039699 99.7166082  
99.7603932 99.984277 100.464898 99.602685  
100.13236 100.514945 99.4380501 99.8030224  
99.8544995 99.9293055 100.743249 99.7034517  
99.9291793 100.255263 99.3977772 99.8273918  
99.9656435 100.170561 100.561464 99.736642  
100.054017 100.21717 99.8260941 99.6236158  
99.8753589 100.027944 99.9491379 99.696425  
99.9715351 100.124416 99.808739 99.6994151  
99.8994029 99.9839673 99.6961528 99.7181033  
99.8901675 100.28964 99.8292092 99.7137676  
99.9099123 100.167154 99.9793982 99.7091329  
99.8661234 100.142378 100.093542 99.7888194  
100.048444 100.199053 100.166078 99.8353156  
99.8282261 100.186975 100.241951 99.9257665  
99.7750426 100.351579 99.955368 99.9148526  
99.6720194 100.147798 100.264646 100.024291  
99.7229737 100.266877 99.9044149 99.885998  
99.7307761 100.221351 100.62599 99.7390341  
99.9798152 100.558458 99.5584239 99.8073581  
99.3919687 100.020519 101.171598 99.9720887  
100.107187 100.124648 100.166269 100.005592  
99.9602267 99.4567098 100.235579 99.9819603  
99.8379454 99.9361956 99.887469 99.8169847  
99.7026079 99.5951867 99.7662322 99.9457644  
99.5421137 99.7723442 100.027203 99.9508497  
99.5548513 99.8490867 99.5511708 99.784528  
99.5167976 99.9818388 100.029432 99.7320289



99.5846255 99.5800238 99.607109 99.7734598  
99.6171065 99.9315539 99.9980083 99.7212599  
99.8299843 99.5560418 99.7468433 99.9779219  
99.7728242 99.92815 99.7599921 99.8216213  
99.7916122 99.5117911 99.9980083 99.8974533  
99.5492786 100.093858 99.8908119 99.5043835  
99.5409991 99.6544455 99.7439461 99.8368775  
99.3074226 99.745113 99.9596761 99.7345716  
99.9185109 99.5599099 99.3755558 100.066916  
99.7615195 99.5653252 100.287728 100.331804  
100.302392 99.7817823 99.8790002 100.438597  
99.9484444 99.5769294 100.351244 100.133175  
100.150654 100.174623 99.5184101 100.075591  
100.339172 99.6522794 100.753509 100.107599  
100.170716 99.7078248 100.190115 100.060933  
100.420692 99.7839484 100.06665 100.043434  
99.9839506 99.5894619 100.866723 99.7688232  
100.160685 99.99236 99.9385043 99.8617061  
99.8156545 99.7726537 100.190784 99.7082473  
99.7225105 99.6479471 100.399382 99.5779719  
99.8947871 100.043728 99.9291441 99.7424988  
99.7362035 99.682605 100.335867 99.8862355  
99.5080405 99.7392335 99.8723144 99.8539284  
99.7051555 100.150332 99.4885467 99.8027755  
99.981403 99.7375316 100.264774 99.8346339  
99.6164696 99.8156666 99.9790651 100.028028  
100.075502 100.259876 99.5560737 100.161743  
99.7414577 99.868427 100.654336 99.9801655  
99.679521 100.001643 99.7221056 100.06213  
100.159252 100.182669 99.7764839 99.9384354  
99.999395 99.7732725 100.344112 99.8256597  
100.004649 99.8602267 100.21463 99.9046326  
100.146674 100.230324 99.6142406 100.026981  
99.8963793 99.6343315 100.675731 99.8560224  
99.8686749 99.9012283 99.7517462 99.6855127  
100.100022 100.22135 99.9364985 100.087108  
99.911346 99.7916846 100.365284 100.016661  
99.8462248 99.8223197 99.8346508 100.137663  
99.8787058 100.232335 99.3637442 99.7570071  
99.9183517 99.9724007 100.16872 99.8463004  
100.219756 100.030731 99.8491368 100.250289  
100.425151 100.437961 99.7499633 99.9807637  
100.359233 100.073899 100.057958 99.9859987  
100.107506 100.090764 99.7024938 100.130334  
100.205108 100.404077 99.554068 100.132278  
99.9201031 99.8650231 100.51839 100.251037

99.9821991 100.006285 99.7820554 100.335992  
99.9941407 100.353173 99.7466204 99.9255724  
100.108779 100.095715 100.145988 99.925722  
99.9947776 100.089216 99.9746079 100.006041  
100.167691 100.390926 99.547605 100.083219  
99.9419164 99.8979791 100.311575 99.8970046  
99.9382543 100.011391 99.6842192 100.103262  
100.471802 100.145381 99.8027815 100.216636  
100.013406 99.7896732 100.149554 100.076339  
100.144763 100.100975 99.8009986 100.170418  
100.679426 100.549362 99.6659445 100.24625  
100.397128 100.14832 100.215298 100.176401  
100.24348 100.177254 100.02698 99.9571317  
100.215298 100.425429 99.7760381 99.9949729  
100.192529 100.008296 100.154903 100.055997  
99.9239244 100.026708 100.24271 99.7541653  
100.267363 100.335226 99.7998843 100.2464  
100.014521 99.925365 100.195464 100.178196  
99.8080119 100.105308 99.9157724 99.9284143  
100.179473 100.261268 99.7880727 100.046126  
100.125816 100.026863 100.23023 99.967452  
100.031398 99.9488829 100.423228 100.141103  
100.064198 100.294998 100.027426 100.414666  
100.082827 100.032124 100.108325 100.327916  
99.8982899 99.8591437 100.283271 99.9261707  
100.068019 100.233882 99.6768647 100.130483  
99.9782186 99.9569284 100.037009 100.045677  
99.8409706 99.9788991 100.21307 99.8476465  
100.231698 100.220731 99.5883887 100.180739  
99.8717001 99.9055605 100.273688 100.062728  
99.9129382 100.055177 100.330518 99.8591634  
100.028692 100.342962 99.7671237 99.9490549  
100.013247 100.112115 100.1656 100.145291  
99.9868165 100.054868 100.307563 99.9607214  
100.325638 100.4474 99.5279932 99.9124103  
100.16785 99.9662118 100.346341 99.8442064  
100.000987 100.158996 99.8137018 100.013669  
100.241729 100.406243 99.5649882 100.12106  
100.142534 99.7837937 100.630044 100.151273  
100.226443 99.9629626 100.097182 100.110291  
100.077095 100.431463 99.7109626 100.070356  
100.015158 100.045275 100.827722 99.8507875  
99.8701079 100.085194 100.001574 99.9480079  
100.020094 100.204021 99.7470661 100.205119  
99.9694615 99.8418147 100.558951 100.026233  
100.118014 100.173076 99.7504091 100.100868

|            |            |            |            |
|------------|------------|------------|------------|
| 100.3457   | 100.166578 | 99.881006  | 100.238921 |
| 100.006713 | 99.995915  | 100.610829 | 99.7350093 |
| 100.25971  | 100.29533  | 99.6079572 | 100.070167 |
| 100.28171  | 100.199604 | 99.8009627 | 100.140427 |
| 100.112407 | 100.024881 | 100.142006 | 100.071512 |
| 100.120378 | 100.190465 | 99.7301717 | 100.138932 |
| 100.213638 | 100.211996 | 99.6026145 | 100.108287 |
| 100.266725 | 99.9996325 | 99.9953038 | 99.8276933 |
| 100.449897 | 100.407631 | 99.621314  | 100.016799 |
| 100.435231 | 100.290684 | 100.237952 | 100.066579 |
| 100.141581 | 100.094429 | 100.214578 | 99.8100535 |
| 100.559418 | 100.420642 | 99.8724214 | 100.050882 |
| 100.564679 | 100.166611 | 100.04695  | 99.9076706 |
| 100.444158 | 99.892444  | 100.221033 | 99.7581803 |
| 100.643591 | 100.295021 | 99.6331125 | 100.247313 |
| 100.574244 | 99.9437148 | 99.8931245 | 100.460934 |
| 100.379275 | 100.000717 | 99.9022516 | 100.512807 |
| 100.662084 | 100.076926 | 99.6371195 | 100.469007 |
| 100.531679 | 99.8586765 | 100.48995  | 100.371091 |
| 100.53152  | 100.076616 | 99.8034114 | 100.280201 |
| 100.143653 | 99.8592961 | 100.75063  | 100.133551 |
| 100.207102 | 99.9271409 | 99.7170376 | 100.310099 |
| 99.8842788 | 99.6992878 | 100.639101 | 100.217116 |
| 100.198494 | 99.9065396 | 99.7555496 | 100.47095  |
| 100.306101 | 99.6714063 | 100.497519 | 100.338651 |
| 100.288246 | 99.8448907 | 100.084126 | 100.193496 |
| 100.244087 | 99.7022308 | 100.122638 | 100.279453 |
| 99.9875823 | 99.8131369 | 99.9091526 | 100.100214 |
| 100.149233 | 99.8199523 | 99.5620989 | 100.199924 |
| 100.039393 | 99.962922  | 100.035152 | 100.42416  |
| 99.8171634 | 100.045792 | 99.6130773 | 100.229822 |
| 99.6367011 | 99.713848  | 100.268673 | 100.113369 |
| 99.8654673 | 99.9819743 | 99.5193573 | 100.123236 |
| 99.8233807 | 99.9229586 | 100.348813 | 100.096327 |
| 99.9258871 | 100.265745 | 99.5692226 | 100.129215 |
| 99.6497735 | 99.9237331 | 100.654683 | 99.9428009 |
| 99.8174822 | 100.092571 | 99.5202477 | 100.046099 |
| 99.899583  | 99.6061948 | 100.800718 | 99.8856956 |
| 100.121654 | 100.059732 | 99.4750573 | 100.200821 |
| 99.8941628 | 99.9526988 | 100.490172 | 100.181686 |
| 100.055654 | 100.041455 | 99.943435  | 100.054321 |
| 99.7675841 | 99.7570642 | 100.412703 | 99.7825472 |
| 100.073828 | 99.9463481 | 99.7864928 | 99.9408575 |
| 99.9058003 | 99.8311049 | 100.045614 | 100.081528 |
| 99.947887  | 100.195112 | 99.6987833 | 99.8360648 |
| 100.005915 | 99.9051455 | 99.6843135 | 99.7517522 |

99.9474087 99.9746942 99.6800838 99.8658134  
99.9592057 100.042539 99.6593808 99.8001871  
99.8401197 99.913355 99.9213963 100.053424  
99.8903367 99.8569726 99.8583968 99.8433898  
99.9257277 99.9175373 100.334121 99.9779311  
99.9397566 100.058493 99.5262583 100.121741  
99.8378879 99.7720892 100.048508 100.2071  
100.123886 99.9511499 99.6847587 100.098121  
100.066495 99.8630136 100.384209 100.021433  
100.268957 99.9345759 99.744419 100.027263  
100.064263 99.9889447 100.517331 99.7900218  
100.045611 99.9691179 99.6268793 99.7164725  
99.959684 99.9517694 100.202334 99.7371022  
100.059002 100.042694 99.5876994 99.8282913  
99.7773086 100.028753 100.211016 99.8489209  
99.8574964 100.09412 99.425192 100.087956  
99.8292792 99.9990129 100.562299 99.9611882  
100.150349 100.360542 99.761115 100.178846  
99.8653079 99.9065396 100.769552 100.090049  
100.025683 100.158402 99.5378341 100.240137  
99.7889462 99.8481435 100.291824 100.178248  
99.9469304 100.105117 99.7655672 100.189161  
99.6748022 99.9393777 100.300061 99.8972063  
99.971481 99.9423207 99.7706873 99.941306  
99.6873963 99.9669493 100.092363 99.840998  
99.8192358 100.215249 99.7673481 100.024124  
99.6580633 100.04037 100.252199 99.8100535  
99.9458145 100.351713 99.7136984 99.7963004  
99.9316262 100.266675 100.115737 99.7136322  
100.103161 100.330802 99.603505 99.9553581  
99.8066417 100.022557 100.257319 99.8803139  
99.8873077 100.231823 99.9563465 99.7841916  
99.7049324 99.9610632 100.050289 99.5970298  
100.002727 100.154219 99.6832004 99.7608711  
99.7687 99.8552688 100.088801 99.7722324  
99.9372059 100.313453 99.4641492 99.701374  
99.8772643 100.158402 99.6889883 99.6879199  
100.049756 100.077855 99.7900546 100.032196  
99.6540778 99.9159883 100.300284 99.9481825  
99.9509159 99.9378287 99.7673481 100.190955  
99.6776718 99.8063214 100.604818 99.9185834  
99.9274813 99.881911 99.717928 99.8058677  
99.6512082 99.8817561 100.620846 99.6417274  
99.9351334 99.953938 99.6295507 99.9383162  
99.4619779 99.8495376 100.464127 99.7526492  
99.7696565 100.077081 99.3283553 99.7535461

|            |            |            |            |
|------------|------------|------------|------------|
| 99.8624384 | 100.114566 | 100.318983 | 99.8181259 |
| 100.083553 | 100.214319 | 99.560318  | 99.901392  |
| 99.9171191 | 99.9743844 | 100.542932 | 99.8549006 |
| 99.9799302 | 100.063915 | 99.6854265 | 100.021881 |
| 99.9027714 | 99.9296192 | 100.75063  | 99.956554  |
| 99.9112206 | 99.9320976 | 99.8063054 | 100.08377  |
| 99.7994679 | 99.8792778 | 100.391332 | 99.8395031 |
| 99.9459739 | 100.000252 | 99.8750928 | 99.9143977 |
| 99.7334684 | 100.049509 | 100.467911 | 99.7587783 |
| 99.7472863 | 99.5778983 | 99.7066573 | 99.8891874 |
| 99.797047  | 99.6531732 | 99.4916321 | 99.971553  |
| 99.6588781 | 99.5683423 | 99.622942  | 100.030739 |
| 99.7824505 | 99.6965945 | 99.9265694 | 99.9602721 |
| 99.8715221 | 99.5550979 | 99.5570746 | 99.9268932 |
| 99.9325619 | 99.6633998 | 99.7381037 | 99.947446  |
| 100.071726 | 99.9455548 | 99.7676377 | 100.049901 |
| 99.8511203 | 99.7943345 | 99.8279808 | 100.171981 |
| 99.7613852 | 99.6766442 | 99.5126672 | 100.106768 |
| 99.9523003 | 99.8481501 | 99.7576514 | 99.8238203 |
| 99.9901184 | 99.8100936 | 99.6537509 | 99.8176391 |
| 99.8925875 | 99.6830149 | 99.8917234 | 99.9747981 |
| 99.8131363 | 99.5706894 | 99.9720391 | 100.041247 |
| 99.74513   | 99.7596309 | 100.346846 | 99.9993687 |
| 99.8048428 | 99.8872126 | 100.051505 | 99.9106673 |
| 99.8018572 | 99.665244  | 99.7593512 | 99.9621265 |
| 99.7827823 | 99.7120183 | 99.895548  | 100.035838 |
| 99.7720008 | 99.8828537 | 99.8407293 | 99.8165573 |
| 99.9347182 | 100.016974 | 99.7208931 | 99.8375737 |
| 99.9403578 | 99.7115154 | 99.6318659 | 100.01714  |
| 99.9255954 | 99.896098  | 99.9605655 | 100.12284  |
| 99.6454428 | 99.5250886 | 99.5883085 | 100.200569 |
| 99.5981701 | 99.4597051 | 99.8069457 | 100.14911  |
| 99.840007  | 99.5924839 | 99.8182069 | 100.036302 |
| 99.9901184 | 99.9292927 | 99.8505032 | 99.9423464 |
| 99.9965873 | 99.9522608 | 99.7703999 | 100.029039 |
| 100.039879 | 99.9728817 | 99.9932867 | 100.085134 |
| 100.041206 | 100.018315 | 99.7072947 | 100.224213 |
| 100.072389 | 100.056707 | 99.8549652 | 100.01714  |
| 99.8317136 | 99.990485  | 99.8883238 | 99.9205574 |
| 100.098099 | 100.239278 | 99.2678955 | 100.084979 |
| 99.8842941 | 99.8473119 | 99.6607626 | 100.10955  |
| 100.113027 | 100.108678 | 99.7100569 | 99.8119214 |
| 100.245723 | 100.381948 | 99.7659379 | 99.6593983 |
| 100.122316 | 100.325953 | 99.7672128 | 99.9459006 |
| 100.240746 | 100.32545  | 100.062766 | 100.210923 |
| 100.090967 | 100.117731 | 99.8375422 | 100.050673 |

|            |            |            |            |
|------------|------------|------------|------------|
| 100.028434 | 100.167188 | 100.040669 | 100.052837 |
| 100.049997 | 100.030553 | 100.05533  | 100.234103 |
| 100.062935 | 99.6582027 | 100.176441 | 99.7870417 |
| 100.087152 | 99.9735523 | 99.6478016 | 99.8462275 |
| 99.9819909 | 100.108678 | 99.2698078 | 100.083743 |
| 100.108051 | 100.292926 | 100.280553 | 99.969544  |
| 99.8874456 | 100.004735 | 100.150519 | 99.9398739 |
| 99.875503  | 99.6734588 | 99.9204076 | 100.000141 |
| 99.9977484 | 99.9529314 | 100.052992 | 99.8981502 |
| 100.097436 | 100.022841 | 99.9684271 | 99.9831429 |
| 100.101582 | 99.967014  | 99.8915109 | 100.085752 |
| 100.113857 | 99.8820154 | 100.049805 | 99.9703167 |
| 100.004051 | 99.8905656 | 99.9966863 | 99.9060314 |
| 99.8098189 | 99.725598  | 99.9962613 | 100.063963 |
| 100.055637 | 99.9294604 | 99.7606261 | 100.224213 |
| 100.032581 | 99.8508325 | 100.023671 | 100.168736 |
| 100.286692 | 100.255875 | 99.8590022 | 100.0567   |
| 100.149519 | 100.048827 | 99.7200432 | 100.166881 |
| 100.098099 | 99.8820154 | 100.199813 | 99.9608902 |
| 100.110871 | 99.9416988 | 100.078489 | 100.040011 |
| 100.032415 | 100.211615 | 99.8483784 | 100.062418 |
| 99.8829671 | 100.090237 | 100.11801  | 99.9247298 |
| 100.230794 | 100.387983 | 99.8600646 | 100.010959 |
| 100.047343 | 100.212454 | 100.275454 | 100.097187 |
| 99.8595796 | 99.9547755 | 100.060004 | 100.020385 |
| 99.9401919 | 99.9894791 | 100.332185 | 100.006632 |
| 100.104734 | 100.11572  | 100.190889 | 99.933229  |
| 100.206412 | 100.206753 | 100.246982 | 99.8567357 |
| 99.9393625 | 100.251684 | 100.331973 | 99.8782156 |
| 99.8567598 | 99.94304   | 100.375318 | 100.069217 |
| 99.9715411 | 99.9589668 | 100.017934 | 99.9615084 |
| 100.066086 | 100.069783 | 100.159442 | 99.7998679 |
| 100.255841 | 100.673659 | 99.7899477 | 100.110323 |
| 100.194137 | 100.516235 | 99.9584407 | 100.163636 |
| 100.17274  | 100.307176 | 100.362144 | 100.055927 |
| 100.101417 | 100.036253 | 100.2064   | 100.124849 |
| 100.219183 | 100.183115 | 99.7729496 | 100.089461 |
| 100.231955 | 100.173056 | 100.030257 | 99.9069586 |
| 100.222003 | 100.091913 | 99.8050334 | 100.040474 |
| 100.099758 | 99.9442136 | 100.194926 | 99.9540908 |
| 99.9448362 | 100.004903 | 100.353433 | 99.8677074 |
| 99.9498123 | 99.8092553 | 100.696368 | 99.9806703 |
| 99.9673944 | 100.117061 | 100.430136 | 99.9570269 |
| 100.16992  | 100.317235 | 100.027283 | 100.110477 |
| 100.136747 | 100.250342 | 99.9282692 | 99.9486822 |
| 99.8569257 | 99.8134466 | 100.337922 | 99.882388  |

99.8864503 99.6679264 100.274392 99.8174845  
100.126794 100.170876 99.6803103 100.148338  
99.6918861 99.6392582 100.314975 99.9888605  
99.8494616 100.051342 100.236784 99.9364742  
100.08483 100.375409 100.116947 100.052991  
99.9254296 100.220668 100.568033 100.120058  
99.9595986 100.11069 99.9941366 100.115731  
100.146367 100.347579 99.9843627 100.021312  
100.26148 100.391839 100.071265 99.8168664  
99.9529638 100.220668 100.456483 99.916076  
99.840007 99.8677652 100.626676 100.254192  
99.9103355 99.9004569 99.8441289 100.143702  
100.073385 100.171547 100.180478 99.8017223  
99.9196241 99.8444618 100.11461 99.9139125  
99.9634135 99.9541049 100.102712 99.8451458  
99.9143163 99.7929933 100.153281 99.7893597  
100.003056 99.6794942 100.490267 99.8996956  
99.9433764 99.6733196 100.220609 100.055061  
99.7992435 99.6209616 100.185142 100.002511  
100.01893 99.9458501 100.043062 99.9886009  
100.222177 100.217542 100.120792 99.7406901  
100.255886 100.190691 99.9281664 100.015339  
100.195443 100.39425 99.8636039 100.162324  
99.9543358 100.038148 100.387537 99.972836  
100.088007 99.8569085 100.103802 99.9320328  
100.107602 100.021534 100.194699 100.07469  
100.025406 100.308161 100.236113 100.163406  
100.281624 100.480339 99.9423956 100.203591  
100.043173 100.456173 100.273491 99.996638  
100.183653 100.228449 99.6503776 99.9876736  
100.380923 100.346087 99.4443721 100.241458  
100.184317 100.440735 99.2976197 100.339911  
100.001661 100.049392 99.6909415 100.094319  
99.9714391 99.9669947 100.480346 99.9964834  
100.212048 100.343067 99.9436699 100.053979  
100.300222 100.335683 99.622981 99.8824197  
100.248579 100.210158 99.6847826 100.145632  
100.275812 100.100071 99.6960386 100.00823  
100.274317 100.139676 99.8890891 99.8535173  
100.322971 100.391229 99.7249218 100.128012  
100.248413 100.307993 100.071733 100.222756  
100.060609 100.055936 99.8531974 100.140531  
99.9910332 100.028918 99.9090525 100.095555  
100.112251 100.07792 99.3549614 100.140377  
99.9179704 99.7716588 99.7070822 100.035741  
99.8694833 99.691108 100.062813 99.983346

99.9158118 99.774176 100.064512 100.176543  
99.8115313 99.8082424 100.111448 100.113947  
99.8792804 99.8664739 99.96512 100.184117  
99.9254428 99.8845979 99.9037431 100.208228  
100.030554 100.060299 99.7826883 99.9835005  
99.8321217 99.7763576 100.234838 99.8372888  
99.926273 99.9550799 100.089148 99.8666548  
99.9852214 99.8683199 100.068335 99.7315712  
100.000332 100.120041 99.9028936 99.8564539  
99.8922324 100.031603 100.118244 99.9403789  
100.065092 100.157632 100.106775 99.9224502  
100.029889 100.131788 100.304498 99.7767021  
100.028727 100.210158 100.348672 99.8263152  
100.035369 100.057111 100.412598 99.8488806  
100.002657 99.9473604 100.116545 99.9213683  
99.9800738 100.092184 100.358442 99.9324964  
99.8938929 100.10477 100.46548 100.026931  
100.01428 100.072886 100.268606 100.10251  
100.011956 100.098729 100.226768 99.9893737  
100.105609 100.070033 99.7060203 99.9649536  
100.106439 100.100071 100.036903 99.8655729  
100.004649 99.7842449 99.6457053 99.9159587  
99.7002766 99.5246361 99.9186094 99.888602  
99.977417 99.7246708 99.9670314 99.9912284  
99.7994095 99.5670932 100.526219 99.8587723  
99.8590221 99.7449764 100.085962 99.9226047  
99.8742988 99.7349075 99.7425491 99.9105492  
99.6765312 99.5526611 99.9298654 99.872528  
99.5415312 99.494933 100.033718 99.888602  
100.015443 99.8713405 99.8330216 99.8765465  
99.9802398 99.9755532 100.017365 100.023376  
100.055129 100.220898 99.9855081 99.8912295  
100.135498 100.187335 99.8238894 100.003284  
100.066753 100.058621 99.7690962 99.9547528  
100.027066 99.738935 100.050071 99.9122493  
99.9510147 99.8406305 99.8449147 99.9212137  
99.8111992 99.4222694 99.8916376 99.9799457  
99.8397601 99.4986249 99.6875435 99.9655718  
99.9730996 99.9231952 99.9731903 99.9388333  
100.041679 100.180287 100.2805 99.9352785  
99.804225 100.029254 100.077043 100.009775  
99.8294649 99.8810738 100.18854 100.019513  
99.9380627 99.7716588 100.037328 99.9527435  
99.9609778 99.9102735 100.332107 100.094009  
100.026402 100.001397 100.027559 100.016421  
99.9008671 99.7933069 100.277739 99.9954015



99.8884132 99.7929713 100.044549 99.9528981  
99.7130626 99.6301914 99.7242847 99.955371  
99.7630442 99.7966632 99.7578402 100.009775  
99.861845 99.8768784 99.8782579 100.116575  
99.9722694 99.7884403 99.6803227 100.195399  
99.8244833 99.7119169 100.278163 99.9164224  
99.9875461 100.05795 100.265421 99.9196681  
100.052804 100.070033 100.233352 99.9681993  
100.204908 100.249258 100.061327 100.067116  
100.005314 99.9758889 100.590145 99.9107038  
99.9528413 100.104099 100.260111 100.138368  
99.9035239 100.207976 99.9587487 100.119821  
99.9755904 100.153772 99.7631496 100.111011  
99.9516789 100.184482 99.5441892 100.015958  
99.9845572 100.082619 99.9806235 99.8881383  
100.087841 100.306819 100.045823 99.8380616  
100.113745 100.293897 100.14118 100.064489  
100.156919 100.186831 100.381803 99.8295609  
100.334594 100.32897 100.020763 100.138677  
100.128856 100.151423 99.7852368 100.324919  
99.8706457 99.9695119 99.7153649 99.9498069  
99.9940221 100.037141 99.7744056 100.013639  
99.8914022 99.7726657 100.134809 99.981955  
100.061439 100.002571 100.219123 100.065107  
99.8630429 99.8997975 100.4476 100.021589  
99.9259217 99.9831216 100.306841 99.9171234  
100.031438 99.9024799 100.398696 99.9667293  
99.8547476 99.8552014 100.53095 99.8206932  
99.7359582 99.6689376 100.29217 99.8973428  
99.7001223 99.8625782 100.26793 99.8573181  
99.738115 99.8397773 100.325978 99.9080058  
99.9028606 99.9970369 100.482258 99.8760169  
99.9559508 100.03543 100.405713 99.9563754  
99.7225198 99.5718658 100.541156 99.9645658  
99.62928 99.5083248 100.141417 100.040134  
99.6609683 99.6038877 99.989814 100.001345  
99.7792599 99.7794217 100.15375 100.099012  
99.7356264 99.7588003 100.019794 100.040906  
99.8487749 100.037442 99.9256007 100.085104  
99.8164231 99.9459024 100.466311 99.9277864  
99.9737029 99.9692063 100.307054 99.9854281  
99.8786382 99.7738891 100.193723 99.9280954  
99.780919 99.9935162 99.6238828 99.9573026  
99.7779327 99.9975399 99.9540927 100.06795  
99.9144741 100.124119 100.001509 100.031789  
99.7995006 100.029562 99.927089 100.044461

99.7643283 99.8848762 100.134188 99.9903732  
99.9541259 100.005252 100.009588 100.213677  
99.9043538 99.6897267 100.120367 100.09793  
100.167814 100.195875 99.9372951 99.9709018  
100.145417 100.316586 99.9747175 100.145991  
100.174284 100.286408 100.069549 100.238094  
100.207466 100.312227 99.9317668 100.022053  
100.100456 100.122945 100.025961 99.8889979  
99.9866436 99.9683681 100.030426 100.072895  
99.9187877 99.7809306 100.231146 100.015408  
99.9816664 99.928634 100.079543 99.9732198  
99.7863939 99.8206647 100.334908 99.9161962  
99.7082518 99.7919958 100.408689 99.8860618  
99.8303593 99.8459805 100.05828 100.041215  
99.9106582 99.7552795 99.9762059 100.025298  
100.068768 99.8724698 99.7737849 100.020817  
100.048527 99.8790083 100.133337 99.7880862  
99.9405215 99.7643328 100.429527 99.8276473  
100.15703 100.130993 99.3032411 99.9268591  
100.117212 100.144908 99.8118451 99.9276318  
99.8814586 100.009276 100.396995 99.9699746  
99.8240548 99.7490763 99.8379983 100.221713  
99.9624212 99.8144615 99.6963886 100.123119  
99.9144741 99.8067494 99.7272196 99.9226867  
100.077063 99.8785054 99.7325352 99.6258239  
100.05732 99.7800923 99.9117799 99.7253448  
100.0472 99.6067379 99.6823552 99.919905  
99.8816245 99.6209885 99.8473539 100.029934  
100.033429 99.7061568 99.7076579 99.9724471  
100.033761 99.7380111 99.2732607 99.8554637  
99.786228 99.609588 99.8092936 99.7367804  
99.8360001 99.7039773 100.144181 100.046779  
99.9433419 99.9254486 100.032339 100.135173  
100.137785 100.166032 100.154175 100.11972  
100.187723 99.9908337 99.7036179 100.112302  
100.331564 100.194869 100.017668 99.9953184  
100.166653 100.101988 100.017668 100.051569  
100.15056 100.304012 99.8579852 100.268537  
100.238656 100.371577 99.8543706 100.092212  
100.315139 100.538392 99.8803111 100.040288  
100.066777 100.185816 99.7780374 100.254938  
100.217586 100.238459 99.8054663 100.032252  
100.059974 100.027047 100.052539 100.090976  
99.9821641 99.9584765 99.8811616 100.160053  
100.085192 99.9790979 99.8775469 100.077377  
100.226047 100.292611 99.8920056 100.220786

100.094483 100.272493 100.240501 100.064087  
99.9707166 99.9876483 99.8817995 100.050951  
100.061965 99.9794332 99.9485644 99.8651995  
100.174118 100.237621 99.6079357 100.085413  
100.046868 99.9484172 99.6232449 100.034725  
99.9639144 100.128143 100.015329 99.8809621  
100.096972 99.9821157 100.043396 99.9860463  
100.120033 100.012796 99.6806542 99.960857  
100.044379 100.05186 100.069124 99.7911769  
100.050186 100.147926 99.7920708 99.9251592  
100.014018 99.937352 99.7988749 99.9579208  
100.153546 99.8372624 100.044459 99.952512  
100.213107 100.24265 100.182454 100.248602  
99.8970539 100.00039 100.10038 100.272401  
100.127499 100.077511 99.7270069 100.152636  
100.364414 100.260757 99.9204976 100.133937  
100.135462 100.250195 99.9275143 100.270546  
100.217918 100.264445 99.7810142 99.9971728  
100.197511 100.242986 100.357234 99.7574882  
99.9839891 100.018497 100.079755 100.002427  
100.040729 100.131831 100.071888 99.9495759  
100.301037 100.35632 99.6832057 99.9756924  
100.113397 100.442327 99.7176513 99.9749197  
100.022977 99.8880617 100.601117 99.6405048  
99.8763155 99.5530885 100.949188 99.6757389  
100.017834 100.27484 100.052964 99.9480305  
99.9980912 100.547781 99.9217734 99.9817193  
100.016839 100.352464 100.386789 99.9613206  
99.9172945 100.052866 100.229232 100.07614  
99.8391523 99.9487525 99.760602 99.9877461  
99.6395663 99.7792541 100.05424 99.80014  
100.014682 100.081535 99.9411224 99.8758624  
100.041725 99.9489202 100.002997 100.057287  
100.162802 100.026747 100.140899 100.000687  
100.298078 100.250266 99.9056425 100.079974  
100.321481 100.256979 100.131123 99.9727127  
100.49875 100.456501 99.9844863 99.943038  
100.238656 100.186164 99.9156308 99.7974469  
100.124792 100.182304 99.6914256 99.9166091  
100.178072 100.1865 99.9768357 99.9615847  
100.129938 100.024398 99.8758902 99.8563325  
100.256748 100.169887 99.8163855 99.9099632  
100.326129 100.411025 99.7855705 100.056791  
100.092758 100.22778 100.140474 100.132059  
100.061055 100.089004 99.9923494 100.077656  
100.123298 100.094541 100.014451 100.168071

|            |            |            |            |
|------------|------------|------------|------------|
| 100.044457 | 100.153442 | 100.183402 | 100.146742 |
| 100.111016 | 100.136158 | 99.9910743 | 100.155242 |
| 100.214091 | 100.131123 | 99.9451707 | 100.092802 |
| 100.052756 | 100.177774 | 99.5356508 | 99.9737946 |
| 100.044125 | 99.8760567 | 99.7645314 | 100.056636 |
| 99.9639554 | 99.955765  | 99.8144728 | 100.169616 |
| 99.7226172 | 99.706236  | 99.8933166 | 100.009342 |
| 99.920634  | 99.7436569 | 99.7073643 | 100.018152 |
| 99.8474359 | 99.8367898 | 99.3418354 | 100.052    |
| 99.510326  | 99.4847307 | 99.7313787 | 99.8462864 |
| 99.5831922 | 99.5431275 | 99.8867285 | 99.9057902 |
| 99.7946535 | 99.8970325 | 99.9878865 | 99.9744128 |
| 100.002629 | 99.9129742 | 100.094995 | 99.9901774 |
| 99.8788065 | 99.8085982 | 99.9553715 | 100.016452 |
| 100.064707 | 100.078264 | 99.9330572 | 99.9071812 |
| 100.042797 | 100.176263 | 99.702689  | 99.8322219 |
| 99.8439502 | 99.9676793 | 99.7696318 | 99.9530841 |
| 100.011592 | 100.105281 | 99.3711627 | 99.8795158 |
| 100.065868 | 100.093535 | 99.3820011 | 99.8343857 |
| 99.911173  | 100.029936 | 99.4474563 | 100.104239 |
| 100.108194 | 100.259999 | 99.5647656 | 100.039017 |
| 99.9700967 | 100.415221 | 99.4415058 | 99.8778157 |
| 99.8167291 | 100.135151 | 99.4344928 | 99.9006899 |
| 99.8683496 | 100.065175 | 99.8518758 | 99.8657604 |
| 99.8527473 | 99.8220228 | 100.071406 | 99.9006899 |
| 99.6479252 | 99.6280379 | 100.082669 | 99.9170728 |
| 99.6856032 | 99.5280249 | 100.247795 | 100.05169  |
| 99.8522493 | 99.8507178 | 100.084369 | 100.063591 |
| 99.9129988 | 99.8312522 | 100.155987 | 100.097748 |
| 100.016738 | 99.9695252 | 100.172139 | 100.240093 |
| 99.8806323 | 99.8747142 | 100.304537 | 100.158488 |
| 99.8814622 | 99.8252111 | 100.25757  | 100.179044 |
| 99.9335806 | 99.9743916 | 100.457761 | 100.238393 |
| 99.8778106 | 99.8327624 | 100.144724 | 100.12665  |
| 99.9229578 | 99.7706738 | 100.298161 | 100.237466 |
| 100.041137 | 99.9198543 | 100.154075 | 100.240712 |
| 100.01292  | 99.8584369 | 100.121985 | 100.141487 |
| 100.033834 | 99.8156461 | 100.011051 | 100.194036 |
| 100.117821 | 99.8755532 | 100.163    | 100.058336 |
| 100.063047 | 100.024062 | 100.146849 | 100.101303 |
| 100.101721 | 100.030943 | 100.404207 | 100.065137 |
| 100.132427 | 100.03648  | 100.37828  | 99.8974442 |
| 100.072176 | 100.045877 | 100.515141 | 99.7824551 |
| 100.153507 | 100.182808 | 100.364254 | 99.8224849 |
| 100.076657 | 100.071887 | 100.418446 | 99.8934258 |
| 100.1633   | 100.241037 | 99.9812985 | 99.9609665 |

|            |            |            |            |
|------------|------------|------------|------------|
| 100.21658  | 100.340547 | 100.231643 | 99.9455109 |
| 99.9282692 | 100.073566 | 100.320475 | 99.7918829 |
| 99.9694328 | 100.136158 | 100.300074 | 99.7023954 |
| 100.074831 | 100.053932 | 100.035065 | 99.8207848 |
| 99.808762  | 99.6934826 | 100.402507 | 99.9376286 |
| 99.8866077 | 99.8317556 | 100.222505 | 99.8716335 |
| 100.015576 | 99.878406  | 100.024014 | 99.9343829 |
| 100.067196 | 99.989662  | 100.115822 | 99.9883228 |
| 99.9128328 | 99.7881258 | 99.8639892 | 99.9948141 |
| 100.031012 | 99.9404946 | 100.311762 | 99.8006926 |
| 100.354844 | 100.468583 | 100.06078  | 99.9350012 |
| 100.076657 | 100.261845 | 100.032728 | 100.144424 |
| 100.022547 | 100.201267 | 99.8501756 | 0          |
| 100.064707 | 100.177438 | 100.233556 | 0          |
| 100.040639 | 100.201938 | 99.7830203 | 0          |
| 100.038315 | 100.115014 | 99.754118  | 0          |
| 100.024373 | 100.128271 | 100.040591 | 0          |
| 99.9176463 | 100.027754 | 100.194453 | 0          |
| 99.9847031 | 99.8933408 | 99.8907664 | 0          |
| 99.6512449 | 99.5719903 | 100.039316 | 0          |
| 100.025203 | 100.085312 | 99.9572841 | 0          |
| 100.196662 | 100.401125 | 100.006588 | 0          |
| 100.162304 | 100.284331 | 100.266496 | 0          |
| 100.369284 | 100.297588 | 99.886516  | 0          |
| 100.281977 | 100.010638 | 100.344277 | 0          |
| 100.007941 | 100.020371 | 99.810435  | 0          |
| 99.7694242 | 99.9809361 | 99.7296786 | 0          |
| 99.9918404 | 100.022049 | 100.179577 | 0          |
| 100.007277 | 99.860954  | 99.9311446 | 0          |
| 99.9667771 | 99.9112961 | 99.4608448 | 0          |
| 100.076989 | 100.216202 | 99.7188403 | 0          |
| 99.8019567 | 99.8169886 | 100.018701 | 0          |
| 99.8291778 | 99.711438  | 99.7951338 | 0          |
| 99.8230365 | 99.6605924 | 100.338327 | 0          |
| 99.9314229 | 99.935796  | 100.255658 | 0          |
| 100.102053 | 99.8572623 | 100.25077  | 0          |
| 100.225045 | 100.115349 | 100.198703 | 0          |
| 100.146536 | 100.100918 | 99.9158433 | 0          |
| 100.077653 | 100.017686 | 99.9324197 | 0          |
| 100.118485 | 100.055778 | 100.016789 | 0          |
| 100.006779 | 99.9607992 | 100.009138 | 0          |
| 99.9732411 | 99.957341  | 99.8515302 | 99.9355249 |
| 99.9112762 | 99.8158225 | 100.001363 | 99.7929964 |
| 99.979075  | 100.087618 | 100.175933 | 99.7966797 |
| 99.8113124 | 100.077301 | 100.173922 | 99.7443125 |
| 99.8858911 | 99.9479475 | 100.193631 | 99.8517694 |

99.8985048 99.8346095 100.108559 99.9561835  
99.9112762 99.7181916 99.9967372 99.9292792  
100.09591 99.8272179 99.9744131 100.193838  
100.105212 99.8687957 100.004179 100.208891  
100.034733 100.104249 100.016849 100.000543  
99.9035503 100.023557 100.437386 99.9824472  
99.9076497 99.9320863 100.031933 99.884599  
99.9071767 100.036647 100.27247 99.8584954  
100.014078 99.8905085 100.166682 100.023284  
100.04104 99.7617713 100.285944 100.076132  
100.147468 99.8792671 100.260604 99.8520896  
100.170173 99.9655025 100.25638 100.018159  
99.6963698 99.5745172 100.236872 99.8456839  
99.9191598 99.7588455 100.041385 99.9749204  
99.9792326 99.7191156 100.277699 99.9553828  
99.8469462 99.6675283 100.014436 100.067804  
100.161028 99.8376893 99.9993517 100.206329  
99.7709485 99.6869313 100.230436 99.8485665  
99.9505364 99.7660831 99.9814522 100.094868  
99.9212095 99.672918 99.9490723 99.9814863  
99.8910942 99.7245053 99.7670607 100.00759  
99.9853818 99.8992861 100.05124 100.113926  
99.807686 99.7454482 100.25457 99.8360752  
99.9976802 99.9012879 100.342257 99.9047771  
100.087868 100.08038 100.263419 100.05259  
100.177899 100.428248 99.8796867 100.155243  
99.8869948 100.35079 100.14295 99.8376767  
99.8354362 100.352792 100.059285 99.7185293  
99.9489597 100.374967 100.132894 100.043943  
100.008402 100.267019 99.9709941 100.006469  
100.070209 100.531115 100.202481 100.1301  
100.09654 100.327229 99.8816978 100.031291  
100.017862 100.144749 100.024089 100.040259  
100.156455 100.314602 99.8330274 100.157325  
99.7127677 99.9239248 100.065519 99.784829  
99.9115915 100.024789 99.9768265 100.062519  
99.8494689 99.9097575 99.8286028 99.9488168  
99.949275 100.024635 100.016648 100.017519  
100.000045 99.957649 100.070145 99.9960594  
99.9402878 99.8832709 100.185587 99.9433719  
100.200446 100.249618 99.873452 100.301455  
99.9136413 100.070987 99.9518879 100.013996  
100.129809 100.24161 99.7063232 100.097431  
99.8917249 99.8641759 100.101318 99.9952587  
99.9396571 99.8416931 100.18619 99.981166  
100.129967 100.128426 99.9858768 100.110242

|            |            |            |            |
|------------|------------|------------|------------|
| 100.122714 | 100.001691 | 99.9510835 | 100.018319 |
| 100.330367 | 100.05143  | 99.9563125 | 100.038338 |
| 100.355437 | 100.230523 | 99.9822567 | 100.253091 |
| 100.192405 | 100.206654 | 99.6475968 | 99.9742798 |
| 100.400373 | 100.383282 | 99.7632395 | 100.242522 |
| 99.8499419 | 100.093316 | 99.6958651 | 99.9619487 |
| 100.041986 | 100.186327 | 99.9615416 | 100.01928  |
| 100.110415 | 100.227905 | 99.8332285 | 100.108641 |
| 100.162605 | 100.398374 | 99.9170946 | 100.12962  |
| 100.135012 | 100.187713 | 99.7051165 | 99.9979812 |
| 99.9114339 | 100.072527 | 99.8497201 | 99.8008435 |
| 100.014236 | 100.060977 | 100.017251 | 99.9803653 |
| 99.637716  | 99.8361494 | 99.8181446 | 99.7108423 |
| 99.8551451 | 99.9203829 | 99.9800444 | 99.7857899 |
| 99.6129616 | 99.8943583 | 99.8798878 | 99.7263763 |
| 100.034575 | 100.003847 | 99.8161335 | 100.144834 |
| 99.8042172 | 99.8413851 | 99.724826  | 99.8849192 |
| 99.895982  | 99.8110487 | 100.03676  | 100.030651 |
| 99.7834045 | 99.7574596 | 100.008402 | 100.128499 |
| 100.004933 | 99.9618067 | 100.359352 | 100.125296 |
| 99.9754485 | 100.052354 | 100.050838 | 99.9915754 |
| 99.8225071 | 99.8527805 | 99.8748598 | 99.800363  |
| 100.124764 | 100.264247 | 99.854547  | 100.206489 |
| 99.9426528 | 99.9209989 | 100.055866 | 99.9709168 |
| 100.095121 | 99.9333183 | 99.8627928 | 100.112164 |
| 99.7331073 | 99.5463367 | 100.138324 | 99.6054673 |
| 100.08235  | 99.8467748 | 100.100112 | 99.9483364 |
| 100.005248 | 99.6947849 | 100.064715 | 99.8765917 |
| 100.011871 | 99.824446  | 100.286347 | 99.9958993 |
| 100.182787 | 100.232524 | 100.044201 | 100.089584 |
| 99.9886929 | 100.082382 | 100.041385 | 100.136186 |
| 100.231034 | 100.251465 | 99.7155746 | 100.280636 |
| 99.8622403 | 99.8416931 | 100.088246 | 99.8717874 |
| 100.038202 | 100.05605  | 99.5989263 | 100.206649 |
| 99.9270433 | 99.9872154 | 99.6313063 | 99.9975007 |
| 99.9292507 | 99.9296224 | 99.791396  | 99.8283883 |
| 100.123975 | 100.066213 | 99.9484689 | 99.9470553 |
| 100.228984 | 100.067907 | 100.073966 | 99.9369662 |
| 100.137693 | 99.7850241 | 100.039173 | 99.7329422 |
| 100.287796 | 100.261167 | 99.7672619 | 100.011754 |
| 100.140373 | 100.062671 | 99.6582561 | 100.069886 |
| 99.9899543 | 99.8316836 | 99.9359996 | 100.125136 |
| 99.9658306 | 99.9120674 | 99.9927148 | 99.9635501 |
| 99.874381  | 99.844465  | 99.950279  | 99.9568241 |
| 99.9560549 | 100.018938 | 100.032938 | 99.8067688 |
| 100.061064 | 100.090236 | 100.160447 | 99.9949384 |

99.9565279 100.13166 100.023084 99.9292792  
99.895982 99.9998427 100.033743 99.9883725  
100.152356 100.229599 100.092067 100.264301  
100.038192 100.404743 100.141868 100.134468  
100.055707 100.333875 100.137644 99.9796187  
100.041821 100.274278 100.136034 100.095716  
99.9223694 100.178398 100.219911 100.024776  
100.068804 100.466965 100.148908 100.099719  
99.8056005 99.9583837 99.9745169 99.7930627  
100.071013 100.390847 100.096812 100.026218  
100.386447 100.557595 99.4887575 100.032783  
100.169004 100.307319 99.9483684 99.8462271  
100.142968 100.442879 100.259536 100.047676  
100.154961 100.171296 99.9389147 100.007002  
100.179261 100.15632 100.154741 100.009083  
100.092631 100.23151 100.083536 100.075859  
100.107937 100.365681 100.109282 100.080023  
100.168373 100.460326 99.9057262 99.9709715  
100.008053 100.35827 100.073881 99.8531129  
100.153856 100.598665 100.025406 100.029741  
99.8676143 100.393163 100.014947 99.8929862  
100.1092 100.483331 99.9719021 100.003479  
100.002372 100.333412 99.8546359 99.9634452  
100.164428 100.340205 99.6814522 100.056483  
100.251058 100.199705 99.953397 100.075379  
100.279146 99.8918389 100.058595 100.14856  
100.194567 99.8402706 100.025205 99.9770566  
99.9850144 99.7857688 99.9192027 99.911882  
100.10415 99.7795929 99.8492051 100.012126  
100.045608 99.7229295 99.9865855 100.001717  
100.149753 99.9237989 99.937909 100.025897  
100.156223 99.8447481 100.093593 100.019492  
100.17863 99.7777402 100.218704 100.04095  
100.140601 99.6800074 99.9061285 99.9712917  
100.171056 99.8554014 99.7458178 100.017731  
100.046713 99.6381661 99.9572187 99.8820971  
100.120877 99.8342492 99.9648621 99.8894633  
100.04908 99.7172169 100.098823 100.037747  
99.8837094 99.520053 100.068652 99.8486291  
100.050658 99.8333228 100.025205 99.9065976  
100.191569 99.8631212 100.288702 100.012286  
100.125295 99.7885479 100.370768 99.9155651  
100.234648 99.8235958 100.277035 100.037267  
99.7042955 99.4632352 100.363728 99.8918653  
100.143915 99.8399618 100.047733 100.106125  
100.008368 99.7501033 100.006297 100.068013



|            |            |            |            |
|------------|------------|------------|------------|
| 100.145966 | 99.8260662 | 100.123966 | 100.141834 |
| 100.134605 | 99.7283334 | 100.042704 | 100.039028 |
| 100.179419 | 99.8192727 | 99.9483684 | 100.126622 |
| 100.177683 | 99.775733  | 100.017561 | 100.2685   |
| 100.089318 | 99.8401162 | 100.279851 | 100.126462 |
| 100.039927 | 99.5436756 | 99.7419961 | 100.087549 |
| 100.051289 | 99.7442362 | 100.221721 | 100.079062 |
| 99.9591359 | 99.6878816 | 100.079111 | 99.9884261 |
| 100.184626 | 100.058587 | 100.092185 | 100.188754 |
| 100.121823 | 100.090392 | 100.152528 | 100.225424 |
| 100.232281 | 100.143968 | 100.064227 | 100.229267 |
| 100.587164 | 100.346844 | 99.7061927 | 100.111729 |
| 100.114249 | 99.99127   | 99.801132  | 99.9514351 |
| 100.068015 | 100.341286 | 99.7955    | 100.234552 |
| 99.7503719 | 99.882112  | 99.8964736 | 99.8832181 |
| 99.9720752 | 99.887979  | 100.031038 | 100.206208 |
| 100.112514 | 100.067851 | 100.066439 | 100.102121 |
| 99.8545172 | 99.8137145 | 100.06483  | 99.9317387 |
| 100.036456 | 99.9271956 | 100.006297 | 100.194038 |
| 99.9461966 | 99.7930254 | 100.124167 | 100.111889 |
| 99.8895479 | 99.6911239 | 99.6506773 | 100.154005 |
| 99.9633964 | 100.023384 | 99.839148  | 99.9796187 |
| 99.778144  | 99.905117  | 99.9409261 | 99.8904241 |
| 99.7282805 | 99.8067666 | 99.9236279 | 100.003959 |
| 99.8261139 | 99.8682163 | 99.7174567 | 100.069614 |
| 99.5794789 | 99.8564822 | 99.8741468 | 99.8665641 |
| 99.7278071 | 100.017209 | 99.7866497 | 100.096677 |
| 99.806705  | 100.151996 | 100.184108 | 99.9800991 |
| 99.7667827 | 100.122507 | 100.094398 | 99.907078  |
| 99.7035065 | 100.011805 | 99.8592622 | 99.9195685 |
| 99.901856  | 100.155702 | 99.9537993 | 99.9144442 |
| 99.6703694 | 99.9611628 | 100.105058 | 99.8463873 |
| 99.709345  | 99.9057346 | 99.6711939 | 99.974014  |
| 99.6261865 | 100.012577 | 99.9783387 | 99.8020302 |
| 99.6638997 | 100.070475 | 100.011527 | 99.8470278 |
| 99.5618058 | 100.008717 | 100.091381 | 99.7565521 |
| 99.9301014 | 100.320134 | 99.9829649 | 99.8934666 |
| 99.5163606 | 99.857563  | 100.068048 | 99.7522285 |
| 99.9078522 | 99.9668755 | 99.834924  | 100.061928 |
| 99.9390958 | 100.055962 | 100.051957 | 99.7964255 |
| 99.8482054 | 99.8958532 | 99.8099823 | 99.8065139 |
| 99.8617758 | 100.047316 | 99.9000942 | 100.003959 |
| 99.9263143 | 100.14968  | 100.111294 | 100.017891 |
| 99.8822893 | 99.8740834 | 99.9103524 | 99.7676014 |
| 99.984541  | 100.049323 | 99.834924  | 100.041591 |
| 100.163008 | 100.224871 | 99.9473627 | 100.096356 |

99.9561378 100.15246 99.9807524 100.040309  
99.8691922 99.9380034 99.7522544 99.9767363  
99.9392536 100.091164 99.9688849 100.002358  
99.8592511 100.017054 100.01555 99.8820971  
99.8119123 100.026627 99.9043182 99.9011531  
100.080954 100.285704 100.289707 100.044633  
99.9711284 100.231665 100.328327 99.9187678  
99.9259988 100.046853 100.068048 99.9294968  
99.9102192 99.9696546 99.8836005 100.004279  
100.093105 100.009334 100.378814 100.059686  
99.861525 99.5060045 100.275232 100.072543  
99.905345 99.4595827 99.980941 100.08119  
100.064705 99.8028277 100.093186 100.133553  
99.9882561 99.5688739 99.9455376 100.00817  
99.781136 99.3733487 99.888007 100.038275  
100.009063 99.6182163 100.137641 100.191201  
99.9868374 99.7135194 100.162786 100.058131  
99.8068289 99.5144588 100.00347 100.078948  
99.9136991 99.4952445 100.045713 100.086475  
99.9307227 99.5590361 100.083128 100.060533  
99.8218034 99.3229303 100.118733 99.9916765  
99.7838156 99.4374478 99.9028925 100.029948  
99.6849843 99.4343735 100.054564 100.016817  
99.7689988 99.3630498 100.171033 100.00865  
99.8925773 99.3298474 99.8968578 99.9859118  
100.08425 99.6403512 100.211265 99.9583691  
100.10348 99.8718456 100.251496 99.9596501  
99.8654657 99.8727679 100.070858 99.9791862  
100.070379 100.222623 99.9006798 100.072383  
99.8605793 100.207251 99.915163 99.9079275  
99.8887943 100.14346 99.7003285 99.9734215  
99.8525404 100.245372 100.015741 99.9104896  
99.9515293 100.341752 99.9604231 99.9482808  
99.9097585 100.06691 99.9612277 99.9742221  
100.003388 100.189728 99.8176024 100.036033  
100.034913 100.211401 99.5208974 99.9812679  
99.953736 100.04831 100.16178 99.9119308  
99.8903705 100.001273 100.061001 99.8965581  
100.084881 100.293946 99.7765666 100.158534  
99.8571115 100.079822 100.065829 99.9224995  
99.9999204 99.8833742 99.9216 99.9798267  
99.9810053 100.02141 100.223133 99.7308216  
99.9097585 99.9424007 100.001861 99.967977  
100.03649 100.085355 99.9348763 99.9143328  
99.9368701 99.8655433 99.9722913 99.8341067  
99.9540513 100.016799 100.088962 99.8331459

|            |            |            |            |
|------------|------------|------------|------------|
| 99.9609868 | 100.09919  | 100.125773 | 99.9652547 |
| 100.160383 | 100.106414 | 99.8962544 | 100.076226 |
| 100.143833 | 100.230923 | 99.9312555 | 100.114338 |
| 99.997556  | 100.013417 | 99.8387238 | 100.031229 |
| 100.070379 | 100.020795 | 100.198994 | 99.9367512 |
| 99.8960451 | 100.167285 | 99.9346751 | 99.97166   |
| 99.9578343 | 99.9337926 | 100.048731 | 100.006249 |
| 99.9737545 | 100.022025 | 99.8936393 | 100.004967 |
| 99.9633512 | 99.9769865 | 99.9093295 | 99.9036039 |
| 100.028608 | 99.9711453 | 100.005482 | 100.001284 |
| 99.892262  | 99.9553127 | 99.8043261 | 99.8451558 |
| 100.004807 | 99.9891299 | 100.17385  | 99.94732   |
| 99.8340982 | 99.8826056 | 100.22273  | 99.8088058 |
| 100.101274 | 99.9048943 | 99.7735492 | 99.9551664 |
| 100.080309 | 100.15299  | 99.9264277 | 99.887911  |
| 100.079837 | 100.171436 | 99.868696  | 99.9756633 |
| 100.072586 | 100.037396 | 100.077697 | 99.8225772 |
| 99.8301575 | 99.9539293 | 100.087554 | 99.8971987 |
| 100.203573 | 100.176816 | 99.8948463 | 100.100566 |
| 99.9140144 | 100.109335 | 99.9861711 | 99.8421133 |
| 99.8886366 | 100.017875 | 99.7347261 | 100.018899 |
| 99.9896747 | 100.357277 | 99.8526035 | 100.015216 |
| 100.001339 | 99.9356372 | 100.076088 | 99.9867124 |
| 100.074162 | 100.028173 | 100.089364 | 99.8925548 |
| 100.145882 | 100.176201 | 99.9604231 | 100.039236 |
| 100.245028 | 100.258284 | 99.9881826 | 100.136756 |
| 100.213818 | 100.300095 | 99.7522267 | 100.120102 |
| 100.253225 | 100.399702 | 99.8990705 | 100.162537 |
| 99.997556  | 100.133929 | 100.037466 | 100.083112 |
| 100.155655 | 100.223237 | 99.9028925 | 100.116579 |
| 100.184185 | 100.202793 | 100.279658 | 100.081991 |
| 99.9196889 | 99.9736048 | 99.9608254 | 99.9165746 |
| 100.251649 | 100.308703 | 99.9036971 | 100.09304  |
| 99.827005  | 99.8767645 | 100.110687 | 99.9351499 |
| 100.170156 | 100.069676 | 99.9008809 | 100.276391 |
| 100.075896 | 100.030172 | 99.8324879 | 99.992317  |
| 99.9406531 | 99.7640916 | 99.8336949 | 100.025304 |
| 99.984473  | 99.973451  | 100.102842 | 100.052046 |
| 99.7206077 | 99.7205903 | 100.221926 | 99.8044823 |
| 100.066754 | 99.9310258 | 100.027207 | 100.17759  |
| 99.9652427 | 99.9826739 | 100.394518 | 100.002085 |
| 99.9406531 | 99.8355689 | 99.9447329 | 100.008811 |
| 99.9931425 | 100.194493 | 100.123762 | 99.9164145 |
| 99.8689334 | 99.9010514 | 100.080513 | 99.9878333 |
| 100.058084 | 99.9480881 | 99.872518  | 100.114338 |
| 100.070852 | 100.087046 | 100.109882 | 100.109213 |

99.9501107 99.8922897 99.7069666 100.000324  
100.010008 100.125475 100.252099 99.8994405  
100.030342 100.133468 100.027609 99.8228974  
100.211296 100.304091 99.8954497 100.078308  
100.044056 100.107798 100.184109 100.067739  
100.362775 100.302401 99.7954752 100.28728  
100.092762 100.1948 99.8061365 99.9468396  
100.074793 100.198643 100.103847 100.051886  
99.8091933 99.9502401 100.170229 99.9468396  
100.013949 99.9928191 99.7642961 100.022582  
100.041218 100.05615 100.077898 99.9164145  
100.111992 100.035552 100.093186 100.145563  
100.179614 100.170206 100.108273 100.32379  
99.9043992 99.8580113 99.9584115 99.984951  
100.17788 99.9471658 100.011718 100.205132  
100.03712 100.089813 99.9698774 99.9426761  
100.063916 99.9843648 100.110485 100.144282  
100.055877 99.9786773 100.092784 100.03235  
99.8405608 99.750411 100.306814 99.8533225  
100.257503 100.257196 99.9698405 100.205307  
100.096919 100.308865 100.148586 100.122334  
100.272173 100.299765 99.9792905 100.415942  
100.20103 100.388142 100.262186 100.316311  
100.226269 100.430866 99.8290963 100.237983  
100.135882 100.482072 99.6841297 100.167504  
99.9888639 100.212621 100.038202 100.156132  
100.054012 100.212313 100.017694 100.139794  
99.9535291 100.391227 100.031567 100.004442  
99.9749824 100.122393 100.042424 100.064509  
100.107172 99.9524246 99.8341228 100.175513  
100.093449 99.8455388 100.018699 100.269538  
100.106857 99.9113978 99.8055719 100.169907  
100.052435 99.7937154 99.8182388 100.216519  
100.012526 99.7303242 100.12486 100.187046  
100.155442 99.9366925 99.9241992 100.229974  
100.116637 99.877003 100.0189 100.101831  
100.281953 100.033553 99.9193736 100.102952  
100.342054 100.049902 99.9891426 100.140114  
100.024356 99.9345332 100.034784 100.056501  
100.057167 100.157096 99.847393 100.197778  
100.04928 100.180386 100.105156 100.113684  
99.9010002 100.030314 100.113802 100.039201  
99.8054071 99.7289361 100.187391 99.8626842  
100.031139 100.174062 100.124458 100.05602  
100.088874 100.222184 100.189804 100.103753  
99.9292365 99.8109899 99.9328449 100.027188

|            |            |            |            |
|------------|------------|------------|------------|
| 100.085246 | 99.9703161 | 99.8998705 | 99.9965936 |
| 99.7852158 | 99.7698088 | 100.071579 | 99.873256  |
| 99.8110859 | 99.7087312 | 99.8723249 | 100.030872 |
| 99.9358618 | 99.8102187 | 100.011863 | 100.006044 |
| 99.8151872 | 100.071187 | 100.197444 | 99.8577186 |
| 99.7628161 | 100.107895 | 100.351861 | 99.7656158 |
| 99.7695991 | 100.005328 | 100.20991  | 99.8189553 |
| 100.176107 | 100.378117 | 99.9628033 | 100.051054 |
| 99.9131466 | 100.285884 | 99.8544302 | 99.7423899 |
| 99.6957747 | 100.117766 | 100.126871 | 99.7662565 |
| 99.8948482 | 99.9653805 | 100.054287 | 99.9165042 |
| 100.081618 | 100.241001 | 100.415196 | 99.9354053 |
| 99.9820809 | 100.192416 | 99.9989947 | 99.8495495 |
| 100.106384 | 100.234677 | 99.7671688 | 99.8780613 |
| 100.061426 | 100.049594 | 99.8562398 | 99.8718143 |
| 100.005112 | 100.254728 | 100.001407 | 99.9004864 |
| 99.885699  | 99.976177  | 99.875944  | 99.7715424 |
| 99.8973721 | 99.9474891 | 100.034985 | 99.833852  |
| 99.8827019 | 100.329378 | 100.01126  | 99.8295271 |
| 99.6806312 | 99.9843516 | 99.6969977 | 99.6770369 |
| 99.9469039 | 100.163728 | 99.9624012 | 100.005884 |
| 99.8006747 | 100.201516 | 100.111992 | 99.7033062 |
| 99.9084142 | 99.9618331 | 99.9376704 | 99.8626842 |
| 99.9754556 | 100.161106 | 100.053684 | 99.7736247 |
| 99.9484813 | 100.085376 | 100.022921 | 99.9024085 |
| 100.049596 | 100.181466 | 100.277668 | 99.9246734 |
| 100.152445 | 100.255499 | 99.9953755 | 99.9462975 |
| 99.764709  | 99.8831725 | 99.9024843 | 99.7042673 |
| 99.9603122 | 100.089078 | 100.053081 | 99.9168246 |
| 99.9117269 | 99.9828092 | 100.129485 | 99.9096165 |
| 99.9399631 | 100.086302 | 100.277467 | 100.065791 |
| 99.9052593 | 99.9172587 | 100.001407 | 100.022062 |
| 100.096603 | 100.214318 | 100.167687 | 100.023023 |
| 99.9316027 | 99.9692364 | 99.8672983 | 99.9334832 |
| 99.7367882 | 99.8543303 | 99.8502079 | 100.047691 |
| 99.84437   | 99.772585  | 100.02071  | 99.9419727 |
| 99.8916933 | 99.9607534 | 99.8723249 | 99.8952005 |
| 99.9087297 | 99.8982877 | 100.091685 | 99.9339637 |
| 99.8435812 | 99.9135571 | 100.038403 | 99.9124998 |
| 100.024672 | 100.001318 | 99.8196463 | 100.080527 |
| 99.8173957 | 99.7310954 | 99.8286941 | 99.9623154 |
| 100.137617 | 99.9973074 | 100.025334 | 100.016776 |
| 99.9525827 | 99.8711421 | 100.044837 | 99.8112667 |
| 99.8976876 | 99.7829189 | 99.9519459 | 100.087735 |
| 99.9377547 | 99.9368468 | 100.277266 | 100.018698 |
| 100.091398 | 100.035867 | 100.134712 | 100.043846 |

|            |            |            |            |
|------------|------------|------------|------------|
| 99.8571473 | 99.7347971 | 100.027948 | 99.8493893 |
| 100.014576 | 99.7747443 | 99.822059  | 100.061306 |
| 100.116479 | 100.046972 | 99.949131  | 100.058583 |
| 100.165695 | 100.039568 | 99.9563693 | 100.098147 |
| 100.519832 | 100.389993 | 99.8170325 | 100.195856 |
| 100.535449 | 100.486545 | 100.0945   | 100.058102 |
| 100.265548 | 100.217865 | 99.996783  | 99.9751297 |
| 100.293626 | 99.9857397 | 100.048456 | 100.058423 |
| 100.168219 | 100.071187 | 100.033175 | 100.005243 |
| 100.244252 | 100.164191 | 100.224185 | 100.160296 |
| 99.9098339 | 99.8927352 | 100.390465 | 99.904651  |
| 100.116637 | 99.900447  | 100.080626 | 100.137231 |
| 100.172794 | 99.9578229 | 100.041419 | 100.177756 |
| 100.206709 | 99.9295977 | 100.035588 | 100.19009  |
| 99.9536869 | 99.78369   | 99.9885394 | 99.9903467 |
| 99.9639403 | 99.815617  | 99.8672983 | 100.154049 |
| 100.142034 | 100.136274 | 100.029154 | 100.023984 |
| 100.16538  | 100.250872 | 99.9660203 | 100.210112 |
| 100.017889 | 100.115915 | 99.8481973 | 100.089337 |
| 99.8980031 | 99.8876454 | 99.6732723 | 100.126018 |
| 99.7956269 | 99.6863669 | 99.6831244 | 100.007326 |
| 99.9355463 | 99.7832273 | 99.7643539 | 100.175994 |
| 99.9909146 | 99.6973177 | 99.7595284 | 100.036638 |
| 99.8265448 | 99.7665698 | 100.197645 | 99.9733677 |
| 99.9729317 | 99.7061091 | 99.7211253 | 99.9978751 |
| 100.000222 | 99.657062  | 99.917363  | 99.9975547 |
| 100.019782 | 99.5043679 | 99.9601895 | 100.053137 |
| 100.734894 | 100.459649 | 100.067401 | 100.562999 |
| 100.57476  | 100.301749 | 100.325048 | 100.470835 |
| 100.67514  | 100.501511 | 100.30072  | 100.495586 |
| 100.477596 | 100.450836 | 99.9392733 | 100.556974 |
| 100.616232 | 100.446062 | 100.018977 | 100.363365 |
| 100.718813 | 100.304687 | 100.162165 | 100.437454 |
| 100.684111 | 100.382719 | 100.454103 | 100.32347  |
| 100.664137 | 100.891855 | 100.016197 | 100.449341 |
| 100.448312 | 100.546311 | 100.558135 | 100.06782  |
| 100.634345 | 100.992471 | 100.069487 | 100.481745 |
| 100.674463 | 100.882491 | 100.022684 | 99.9815183 |
| 100.554108 | 100.893508 | 99.7794027 | 100.351803 |
| 100.458807 | 100.663267 | 99.6255563 | 100.243681 |
| 100.539889 | 100.529419 | 99.773842  | 100.499331 |
| 100.556647 | 100.466075 | 99.7186983 | 100.462856 |
| 100.676325 | 100.753784 | 99.3642026 | 100.824511 |
| 100.392282 | 100.176714 | 99.6939067 | 100.346593 |
| 100.535827 | 100.428804 | 99.6433969 | 100.768333 |
| 100.599982 | 100.322313 | 99.3491423 | 100.524896 |

|            |            |            |            |
|------------|------------|------------|------------|
| 100.872006 | 100.273657 | 99.675371  | 100.727136 |
| 100.874038 | 100.363991 | 99.7909876 | 100.485653 |
| 101.012166 | 100.738912 | 99.3037298 | 100.892739 |
| 100.967985 | 100.352975 | 99.7604036 | 100.708247 |
| 100.891134 | 100.431925 | 99.6225442 | 100.685939 |
| 100.797525 | 100.435781 | 99.4142491 | 100.4539   |
| 100.901799 | 100.818413 | 99.8396438 | 100.946962 |
| 100.466085 | 100.333513 | 99.7705983 | 100.341545 |
| 100.478273 | 100.170839 | 99.7988653 | 100.18441  |
| 100.391605 | 99.9820927 | 100.403825 | 99.7061656 |
| 100.281237 | 100.385656 | 100.744187 | 99.9014039 |
| 100.282592 | 100.306339 | 100.759016 | 99.4127384 |
| 100.642131 | 100.704395 | 100.540526 | 99.7931191 |
| 100.187628 | 100.325618 | 100.319256 | 99.6143271 |
| 100.341499 | 100.798217 | 100.165409 | 99.7525734 |
| 100.33439  | 100.614428 | 99.8873733 | 99.7771614 |
| 100.387711 | 100.507754 | 100.447384 | 99.7528991 |
| 100.760454 | 101.054897 | 99.9951122 | 99.8966817 |
| 100.716273 | 100.6741   | 99.2161486 | 99.6727846 |
| 100.263294 | 100.0772   | 99.8820443 | 99.5871338 |
| 100.087249 | 99.9211358 | 100.084315 | 99.6491737 |
| 100.182042 | 100.25089  | 100.233064 | 99.4179491 |
| 99.7993122 | 100.282654 | 99.8581796 | 99.6719704 |
| 100.196092 | 100.714493 | 100.141776 | 100.31598  |
| 99.5538638 | 99.9741976 | 100.646179 | 99.6703421 |
| 99.4145507 | 100.094643 | 100.104241 | 100.155914 |
| 99.4969875 | 100.021751 | 100.277319 | 99.8831664 |
| 99.5095138 | 99.7408357 | 100.360729 | 99.4259279 |
| 99.7312637 | 99.8816607 | 100.503918 | 99.7006293 |
| 99.3316061 | 99.5298736 | 100.614437 | 99.3705643 |
| 99.5486163 | 99.6350792 | 100.378802 | 99.5674309 |
| 99.0448546 | 99.212237  | 100.518746 | 99.4242996 |
| 99.440619  | 99.5858731 | 100.208041 | 99.5721531 |
| 99.5452308 | 99.8693592 | 100.454335 | 99.8460402 |
| 99.6877601 | 99.904795  | 100.103314 | 99.8608582 |
| 100.057118 | 100.039561 | 100.066011 | 100.157379 |
| 99.4177669 | 99.4481694 | 100.080377 | 99.9976389 |
| 99.7512382 | 99.6528889 | 99.727271  | 100.3321   |
| 99.4756589 | 99.5678798 | 100.060914 | 100.114228 |
| 99.6693092 | 99.6978721 | 99.8382537 | 100.115857 |
| 99.6557672 | 99.8207039 | 99.8836662 | 100.12872  |
| 100.090465 | 100.34508  | 100.093352 | 100.527501 |
| 99.4108266 | 99.5243654 | 99.5620714 | 100.014411 |
| 99.1135802 | 99.3974944 | 99.9939537 | 100.167312 |
| 99.2777767 | 99.5667782 | 99.8500702 | 100.111297 |
| 99.4682108 | 99.7252293 | 99.6445554 | 100.203461 |

99.4131965 99.5348309 99.9886247 100.408632  
99.541676 99.7511176 99.4985866 100.48028  
99.9325314 100.037358 99.8699961 100.467253  
99.5692678 99.7703961 99.8408023 100.216325  
99.8011742 99.8298841 99.7979385 100.386813  
100.051024 99.8948803 99.991405 100.460577  
99.9017234 99.7164162 99.7476603 100.244496  
100.001257 99.8495299 99.9955756 100.115368  
99.8746394 99.6965869 100.105168 100.067983  
100.040867 99.8273137 99.9649916 100.163893  
99.2804851 99.2320663 100.148727 99.8462031  
99.8616053 99.7140294 99.7747688 99.7361271  
100.003627 100.011469 99.543304 100.141422  
99.3874667 99.6460955 100.095437 100.248241  
99.4148892 99.4228319 99.8060478 99.9054747  
100.01446 99.7990385 99.6802366 99.9999186  
99.757332 99.6604167 99.6966871 100.17578  
99.7925412 99.7619503 99.7119791 100.100387  
99.7613946 99.6181876 100.023843 100.008874  
99.8463706 99.8686248 99.8528505 100.140119  
99.8199637 99.3214819 99.8662889 99.1968202  
99.1733342 99.2739282 100.247198 99.3995488  
99.3610599 99.1745979 100.100302 99.4321156  
99.8666835 99.5592504 100.385057 99.277586  
99.2904723 99.1747816 100.116985 99.1935635  
99.6102323 99.2864134 100.271758 99.5719902  
99.9096793 99.6438923 100.477273 99.3780547  
99.5667287 99.4586349 100.53844 99.4295103  
100.198801 99.7479963 100.536355 99.2741664  
100.048485 99.5893616 100.289367 99.0676926  
99.6484884 99.8225399 100.129496 99.5588007  
99.9029083 99.5956042 99.7849635 99.3918956  
99.6269905 99.6451775 100.023147 99.7750445  
99.5423531 99.7186195 99.8180961 99.8181956  
99.9599539 99.6587643 99.5873263 99.8991242  
100.269589 100.458781 99.7058429 100.491161  
100.340316 100.158876 100.015178 99.9882572  
100.503531 100.257303 99.9994684 100.202548  
99.9989232 100.229921 99.8657082 99.9596087  
100.28064 100.360354 99.5686174 99.9704133  
99.9319369 100.140375 99.6534015 99.8623676  
100.203963 100.238061 99.5600697 100.159493  
100.127455 100.337968 99.8846518 100.006592  
100.403052 100.093382 99.9800628 99.8612217  
100.460857 100.094307 100.087949 99.951096  
100.535324 100.519835 99.7483504 100.128225



|            |            |            |            |
|------------|------------|------------|------------|
| 100.217224 | 100.533711 | 99.9491062 | 100.380005 |
| 100.239666 | 99.9832991 | 100.023263 | 99.6669032 |
| 99.8154758 | 100.110773 | 99.8426063 | 99.9029666 |
| 100.412913 | 100.223815 | 99.5810925 | 99.879393  |
| 99.9741009 | 100.295785 | 99.6961401 | 99.8581113 |
| 100.334365 | 99.8097575 | 100.216858 | 99.737624  |
| 99.8979336 | 99.5450047 | 100.47583  | 99.4292027 |
| 100.008104 | 99.4985666 | 100.426161 | 99.5066354 |
| 99.4946553 | 99.7031904 | 100.253128 | 99.2124565 |
| 99.5602815 | 100.14093  | 99.9775216 | 99.7148689 |
| 99.9093247 | 100.583294 | 100.134846 | 99.9948054 |
| 100.081381 | 100.187923 | 99.6326098 | 100.195508 |
| 100.570518 | 100.013641 | 99.9574229 | 99.6912953 |
| 100.001473 | 99.9076291 | 100.074319 | 99.7341861 |
| 100.248507 | 100.051569 | 99.9546507 | 100.094338 |
| 100.356637 | 99.8987485 | 99.5422812 | 99.9903854 |
| 100.38486  | 99.6206748 | 100.244811 | 99.7472826 |
| 100.129156 | 99.6721083 | 99.8936616 | 100.112837 |
| 100.048568 | 99.653607  | 99.3292815 | 100.127243 |
| 99.6243776 | 99.4824705 | 99.9904587 | 100.139849 |
| 99.1044681 | 98.6258631 | 100.24019  | 99.669195  |
| 99.775692  | 99.1997716 | 99.9682808 | 100.041953 |
| 99.4164478 | 99.3159594 | 99.9544196 | 99.8834856 |
| 100.397951 | 100.070995 | 99.0871733 | 100.386225 |
| 100.085291 | 99.6956048 | 99.3777955 | 100.389008 |
| 100.421923 | 100.093382 | 99.4771338 | 100.47168  |
| 100.17897  | 100.001985 | 99.5554493 | 100.417493 |
| 100.370749 | 100.359984 | 99.3186546 | 100.425024 |
| 99.7530798 | 100.166461 | 99.3052555 | 100.374602 |
| 99.9574393 | 100.170162 | 99.4055178 | 100.44958  |
| 99.9339771 | 99.1873757 | 100.098345 | 99.5120377 |
| 99.6888137 | 99.0410309 | 100.406293 | 99.1944489 |
| 99.5174374 | 98.952595  | 100.250355 | 99.4192166 |
| 100.0654   | 99.3914444 | 99.8825727 | 99.3959704 |
| 99.6713021 | 99.0317803 | 100.021646 | 99.350624  |
| 100.289481 | 99.3487066 | 99.9844522 | 99.2949641 |
| 99.8309473 | 99.1091155 | 100.074319 | 99.5388854 |
| 99.765151  | 99.2103173 | 100.363324 | 99.5131836 |
| 100.450656 | 99.2693362 | 99.9243871 | 99.437879  |
| 100.100083 | 99.1379774 | 100.024418 | 99.3408016 |
| 100.17744  | 99.1649892 | 99.7890098 | 99.3558626 |
| 99.9089847 | 99.3357557 | 100.109665 | 99.3324527 |
| 100.270609 | 99.6574923 | 99.8654772 | 99.5112191 |
| 99.923436  | 99.4613791 | 99.9544196 | 99.3859844 |
| 100.264488 | 99.7816356 | 99.9666637 | 99.4607978 |
| 99.8989537 | 99.4832106 | 99.4489495 | 99.569662  |

|            |            |            |            |
|------------|------------|------------|------------|
| 99.9958629 | 99.4846907 | 99.6931368 | 99.5356113 |
| 99.7280875 | 99.5392694 | 99.0231809 | 99.7895186 |
| 101.183596 | 101.618439 | 100.0362   | 102.180766 |
| 99.1961069 | 98.9407542 | 100.347845 | 99.6626468 |
| 99.7357382 | 99.7494435 | 99.6582529 | 100.300444 |
| 99.7180565 | 99.7146611 | 100.380881 | 100.34579  |
| 99.5390295 | 99.7881111 | 100.571703 | 100.085335 |
| 99.5682723 | 99.8082774 | 100.420617 | 100.169643 |
| 99.7629408 | 100.07044  | 100.573551 | 100.071911 |
| 99.5390295 | 100.075435 | 100.346921 | 100.325163 |
| 99.5070664 | 100.153141 | 100.111051 | 100.35905  |
| 99.6270979 | 100.22104  | 100.040128 | 100.24331  |
| 99.8103753 | 100.357579 | 100.409528 | 100.295369 |
| 100.087672 | 100.74111  | 100.064616 | 100.620161 |
| 100.361398 | 100.763497 | 100.445567 | 100.322217 |
| 100.393361 | 100.695597 | 100.169499 | 100.285219 |
| 100.27945  | 100.658409 | 100.047058 | 100.49067  |
| 100.013715 | 100.660815 | 100.79094  | 100.363634 |
| 100.242726 | 100.980701 | 100.094648 | 100.570885 |
| 100.224535 | 101.013818 | 100.24227  | 100.547148 |
| 100.293901 | 100.801054 | 100.698071 | 100.321398 |
| 100.343376 | 100.922422 | 100.476061 | 100.272123 |
| 100.310563 | 100.868954 | 99.7809242 | 100.26672  |
| 100.17251  | 100.5968   | 100.409297 | 100.122332 |
| 100.27809  | 100.806604 | 100.231412 | 100.019689 |
| 100.257348 | 100.939258 | 100.413455 | 100.092047 |
| 100.037517 | 100.572009 | 100.277847 | 99.8934717 |
| 99.9955229 | 100.482648 | 100.737575 | 99.7765859 |
| 99.3890752 | 99.4373275 | 101.395056 | 98.8950313 |
| 99.4756134 | 99.5988434 | 100.399594 | 99.551327  |
| 99.4038666 | 99.6006935 | 99.4295438 | 100.031639 |
| 99.5167574 | 99.8103125 | 99.8654772 | 100.028692 |
| 99.9669602 | 100.296155 | 99.3946599 | 100.559426 |
| 99.8345176 | 100.275804 | 99.5177932 | 100.441231 |
| 100.084951 | 100.548882 | 99.7407268 | 100.524066 |
| 99.8545795 | 100.307996 | 100.005475 | 100.336623 |
| 100.096513 | 100.618262 | 99.6210588 | 100.604445 |
| 99.9800514 | 100.572749 | 100.088411 | 100.49378  |
| 100.031566 | 100.583849 | 100.035738 | 100.320743 |
| 99.9956929 | 100.381816 | 99.7238624 | 100.34579  |
| 100.020515 | 100.186443 | 100.109434 | 100.045554 |
| 99.8870526 | 100.29153  | 99.8696356 | 100.148034 |
| 99.9043519 | 99.8115439 | 99.6726149 | 100.004448 |
| 99.9242142 | 99.7926073 | 99.7169373 | 99.9232323 |
| 99.7865364 | 99.5912913 | 100.098987 | 99.5122502 |
| 100.214    | 100.037312 | 99.5941275 | 100.096613 |

100.131665 99.7584111 99.9570166 99.7232156  
100.136927 100.013779 99.9424733 99.8647307  
99.9715781 99.7545503 99.7975023 99.893001  
99.8649669 99.621075 99.8224337 99.7696247  
99.4665331 99.5260245 99.8695261 99.6684724  
99.8501975 100.077391 99.4699326 100.281269  
99.9046915 99.9455707 99.642605 100.079291  
100.132513 100.073714 99.8162008 100.151683  
100.109086 100.230538 99.535031 100.278491  
100.097203 100.10644 100.105219 100.171129  
100.246424 100.039886 99.8856853 100.118674  
100.124704 99.8016159 100.180475 99.9951338  
99.7255915 99.6650152 100.818301 99.5522862  
99.7968919 99.6227297 100.560447 99.4390415  
99.5964018 99.2838938 100.780673 99.2882118  
99.8984102 99.5721709 100.297514 99.4591412  
99.6651558 99.4956892 99.9824096 99.3775984  
99.6362961 99.6102279 100.013574 99.5823541  
99.5040507 99.4534036 100.075902 99.4142028  
99.937286 99.7799216 99.7762646 99.816524  
99.8383141 99.631003 99.5488818 99.7585126  
99.9068984 99.8589772 99.2771766 99.9395735  
99.7603929 99.500837 99.9106166 99.6586677  
99.9169144 99.3905269 99.7104736 99.6465752  
100.028279 99.5604045 99.5070987 99.7643955  
100.093468 99.4315255 99.7146288 99.5797395  
100.810038 100.243776 99.8074287 100.328985  
100.209416 99.6139049 98.9678437 99.5867662  
99.5393614 99.2531908 100.101757 99.9224152  
99.6581956 99.4614931 100.156236 99.9418613  
99.7026735 99.3282017 99.6063623 99.7921756  
100.224355 99.6648314 99.4263028 99.8312311  
99.5410591 98.894499 99.6917751 99.6341558  
99.4919975 98.9891819 99.9701748 99.4955821  
100.044576 99.6355992 99.9166186 99.9678439  
99.6230546 99.237012 99.7878068 99.7807367  
99.5296849 99.2601771 100.424017 99.9189836  
99.2619687 99.1763414 100.196403 99.9632683  
99.5556587 99.7791862 100.229183 99.7424982  
99.4960719 99.7416808 100.370923 99.8094973  
99.5996273 99.8720306 100.216487 100.043667  
99.663628 99.9845469 100.390775 100.099718  
99.6841693 99.887474 100.186939 100.121615  
99.536815 99.781944 100.376463 99.9952972  
99.9075774 100.156447 100.206099 100.317546  
99.6955434 99.9290241 99.9872573 100.102496

99.7474909 100.045953 99.9951061 100.139754  
100.023526 100.208844 100.12184 100.313624  
100.136418 100.263632 100.35107 100.09694  
100.361524 100.460535 99.9505529 100.193516  
100.097203 100.005138 99.9048455 99.8379311  
99.8359374 100.005322 100.092292 100.244338  
100.074285 100.414573 100.016113 100.067525  
100.121988 100.281649 100.104758 99.942515  
100.154583 100.145232 99.9874882 99.8683258  
100.086847 99.9904301 99.7483323 99.9296054  
99.8766806 100.083826 99.875759 100.287478  
100.531626 100.270434 99.3053398 99.7915219  
99.9301559 99.9700227 100.118147 99.7088353  
99.7865364 99.8222072 99.739791 99.9287883  
100.282244 100.170419 99.7938088 100.103313  
100.100089 99.7992259 100.106835 99.9188202  
100.56507 100.307204 100.153928 99.9273176  
100.115028 100.109381 100.348531 99.7349813  
100.51482 100.311433 99.9064614 99.8253483  
100.133702 99.9667134 100.012419 99.8655477  
100.22062 100.326324 99.8649092 100.094979  
100.516008 100.220794 100.114684 99.7671735  
100.707331 100.545842 100.083751 100.046445  
99.8726063 99.8712952 99.7090885 99.8879352  
100.116725 100.1456 99.6908517 100.155114  
99.8743039 100.038231 100.181168 99.9497051  
100.699182 100.309778 99.8388237 99.6601384  
100.200249 100.127582 100.226875 99.8830329  
99.7812737 99.8067638 100.243958 99.8678355  
100.08515 100.197813 100.137076 99.9248664  
99.9613923 100.176119 100.036197 99.7456031  
100.228769 100.613315 100.127381 100.116876  
99.97022 100.418617 99.9994921 99.8740452  
100.104842 100.553196 100.562755 100.197602  
100.197363 100.42781 100.068515 100.169168  
100.320102 100.404828 100.106374 100.204302  
100.402946 100.870153 100.227337 100.350065  
100.208567 100.665712 99.84875 100.477527  
100.396155 100.878978 100.099448 100.734902  
100.24965 100.66994 100.130612 100.537173  
99.9647876 100.282936 100.518202 100.446152  
100.169352 100.729876 100.025809 100.592896  
100.286319 100.760579 99.689005 100.634893  
100.303125 100.905085 100.38662 100.8622  
100.339455 100.860961 99.9990304 100.854029  
100.288016 100.718293 100.363305 100.748628

100.392081 100.583163 99.9870265 100.330129  
100.535361 100.517345 100.060666 100.237474  
99.4049091 99.4096473 100.330755 100.001343  
100.403285 100.789995 99.8060436 100.749935  
99.4763794 99.6175819 99.7866526 100.091874  
98.7284226 99.4812934 100.568943 99.5313592  
99.0067262 99.9806381 100.453304 99.9516335  
99.6052905 100.382837 100.505446 99.8310897  
99.3743577 100.307954 100.520046 100.15444  
99.7265936 100.591112 100.019713 100.145644  
100.246827 100.715856 100.153429 100.058168  
100.016063 100.560938 100.525144 99.9190541  
100.229232 100.554314 100.846339 99.7629988  
99.6848058 100.317705 101.065105 99.6999576  
99.973937 100.577865 101.190941 99.9359953  
99.5662095 100.041538 100.877161 99.41163  
99.8396069 100.148988 100.898945 100.23931  
100.003544 99.7140388 100.835447 99.8908729  
100.052776 99.9852379 100.439631 99.8481939  
99.8262416 99.3324467 100.791416 99.6950707  
99.9979608 99.3780758 100.403711 100.108015  
99.6007226 98.9468068 100.720735 99.5945633  
99.7020623 99.2831377 100.170577 99.9636878  
99.3484729 99.167409 99.8869243 99.8278318  
99.5643485 99.5370419 100.125851 100.048394  
99.5663787 99.5162512 99.8489185 99.9684118  
100.10776 100.094343 99.5240152 100.485121  
99.8871469 99.646515 100.331175 99.9881224  
99.9769823 99.3707163 100.165016 99.6986544  
99.3936444 99.0722869 100.362692 99.585441  
99.7646595 99.7510205 100.688059 99.9387646  
99.529328 99.6104533 100.112642 99.6854598  
99.967339 99.9872617 100.076026 99.9749277  
99.730654 99.7730991 100.348556 99.6572786  
99.7902059 100.063065 99.9895864 99.9250813  
99.5316965 99.5938943 100.18819 99.7913428  
99.7682123 99.6489069 100.407187 99.8095873  
99.4450756 99.503004 100.089931 99.6351246  
99.6687336 99.8525822 100.242418 100.026403  
99.8008643 99.7182705 100.312868 99.946095  
99.8683678 100.036203 100.266751 99.9680861  
99.7516325 100.002533 100.049839 99.9346922  
99.7709192 100.135004 100.450754 100.102639  
99.6091817 100.026635 100.0605 99.9988736  
99.9093097 100.297098 99.6760384 100.161119  
99.8819023 100.259933 99.9100986 100.150042

99.9015273 100.256437 99.890864 100.061589  
100.028075 100.403444 99.4697874 100.300396  
99.9889942 100.221479 100.096188 99.9907287  
100.077307 100.228471 99.8924862 100.090585  
100.091857 99.9134823 100.059341 99.8744203  
100.271527 100.166099 100.41159 100.187834  
99.8698904 99.6873605 100.165943 99.7576232  
100.258162 100.262877 99.7393042 100.488868  
99.9624327 99.8987633 99.8887783 99.9296424  
100.349689 100.33776 99.568278 100.244034  
100.166635 99.8525822 99.6841494 100.06501  
100.221111 100.088455 99.6911017 100.355618  
99.8903614 99.6271962 99.9147335 99.689858  
99.9842571 100.095447 99.879972 100.125119  
99.8487427 99.7409011 99.8572613 99.7643019  
100.010142 100.032523 99.7729069 99.9995252  
99.9429768 99.8339993 99.9411521 99.8172434  
100.468624 100.229207 100.05656 100.158187  
100.136013 99.7661076 99.7117268 99.7074509  
100.238537 100.018724 99.6046616 100.045462  
100.035519 99.8785245 99.9425426 100.005389  
100.69059 100.137396 99.5263326 100.52047  
100.255117 99.8735568 99.9420791 100.142875  
100.429543 100.483663 99.8848386 100.35741  
99.9274121 99.8205682 100.05262 99.9252441  
99.9121858 100.107406 99.9221492 100.202169  
99.5663787 99.7648196 100.002564 99.6517401  
99.8451899 100.184313 99.8090588 99.9420225  
99.8265799 100.084776 99.880899 99.9793259  
99.7759946 100.322305 100.428275 99.9482126  
99.726932 100.202896 99.8264395 99.7913428  
100.006589 100.440609 99.9008289 100.108177  
99.917938 100.167386 99.7738339 99.8822393  
100.168496 100.379709 99.770126 100.1072  
100.041948 99.8925077 99.6586577 99.85585  
100.31027 100.152851 99.7615515 100.337699  
99.990686 99.9692309 99.8021065 100.034385  
100.224157 100.397924 99.6222741 100.363763  
100.233123 100.139052 99.7541357 100.336559  
100.3639 100.438402 99.7450978 100.136359  
100.454413 100.491942 99.735828 100.090096  
100.262561 100.240798 99.9172826 99.8607369  
100.329049 100.286795 99.8516994 99.9457692  
100.201994 100.072816 99.88901 99.8589451  
100.290476 100.015412 99.7919098 100.088304  
100.036703 99.6185488 99.6387278 99.7649535

100.400444 100.30041 99.1444205 100.334767  
100.156146 100.031419 99.7726751 100.097426  
100.43022 100.342728 99.1940135 100.33884  
100.379296 100.133717 99.4285371 100.290459  
100.521747 100.226631 99.6920287 100.416541  
100.236845 99.6650979 99.8915592 99.9288279  
100.470146 100.224239 99.5140502 100.304957  
100.03112 99.8027213 99.7481104 99.8788185  
100.249534 100.364806 99.4931934 100.191092  
99.9248744 100.07208 99.6435944 99.8472165  
100.123663 100.295994 100.007894 99.9245926  
100.178478 100.346407 99.7587706 100.064847  
100.240906 100.463608 99.704311 100.114042  
99.7714709 99.8222696 101.044714 99.8678394  
99.6947528 99.4029574 100.554396 98.9539475  
99.931231 99.7846997 100.496268 100.012618  
99.1437471 99.1293509 100.193646 100.969876  
100.090825 99.8003811 100.002844 100.88635  
100.188345 100.041972 101.075553 99.678514  
99.822228 99.8689869 101.211333 99.4437976  
100.377394 100.488889 100.605425 100.515798  
99.6446614 99.7260581 101.102398 100.436828  
100.031247 100.213649 100.590338 100.364777  
100.22712 99.8996962 101.555887 99.7492157  
100.439135 100.10045 100.362041 100.751865  
101.417998 101.069262 101.339792 99.4446413  
101.547137 101.079553 100.715469 99.394357  
100.649153 100.676085 100.215611 100.875719  
99.3161548 98.6553174 100.568152 100.917735  
101.274713 100.68948 99.2544995 101.133215  
100.175031 100.400355 100.382452 99.5826701  
100.432644 100.3801 100.064966 99.5404852  
99.2447621 99.5040693 99.5211791 100.679475  
99.8671605 99.6445479 99.6722679 100.472601  
100.257075 100.489706 99.9935258 99.2480601  
100.147573 100.162522 99.4734785 100.073701  
98.9620201 99.0421235 100.198306 101.256564  
100.277378 99.9949275 100.013715 101.165613  
100.799593 100.875532 100.607643 99.4157869  
99.5509688 100.254323 99.4481861 100.098337  
99.5203481 99.740596 100.718797 100.481207  
100.420662 100.256773 99.6554063 99.8494469  
99.9768291 99.7030262 100.157483 99.2485663  
100.169373 99.5823126 100.349616 100.738028  
100.18718 100.165789 99.8255754 100.342672  
99.5449778 99.4153718 100.4215 98.7516291

|            |            |            |            |
|------------|------------|------------|------------|
| 99.085002  | 99.2183751 | 100.130859 | 100.45404  |
| 98.6070533 | 98.8299356 | 99.7998393 | 100.743596 |
| 99.83421   | 99.988067  | 100.367809 | 99.5688334 |
| 99.8205638 | 99.5063562 | 100.374465 | 99.7903881 |
| 99.3943707 | 99.3384353 | 100.150383 | 100.370514 |
| 100.328135 | 100.013549 | 99.5644424 | 99.6861072 |
| 99.5775955 | 99.3849892 | 100.329649 | 100.712211 |
| 100.71988  | 100.873082 | 100.584348 | 99.6791889 |
| 99.3076676 | 99.3119731 | 100.638038 | 99.4912134 |
| 99.5000453 | 99.3972403 | 100.51912  | 100.300487 |
| 100.085832 | 99.4923083 | 100.331424 | 99.9400599 |
| 100.894451 | 100.303654 | 99.6523002 | 100.407805 |
| 101.191671 | 100.676575 | 99.6951198 | 99.07139   |
| 100.375397 | 100.319008 | 98.9356821 | 99.980726  |
| 100.116786 | 100.30202  | 100.031908 | 99.7858322 |
| 99.89412   | 99.7819228 | 100.333642 | 99.6783452 |
| 100.200327 | 100.928293 | 100.471197 | 99.7120931 |
| 99.1407516 | 99.7020461 | 100.328983 | 99.6852635 |
| 100.604054 | 100.643579 | 98.3577284 | 100.646571 |
| 99.2605717 | 99.3479094 | 99.7587946 | 100.405949 |
| 101.159386 | 101.408534 | 101.319159 | 99.6602901 |
| 99.4126765 | 99.4256627 | 99.7445953 | 99.0578909 |
| 99.89412   | 99.8235764 | 99.4756971 | 100.380807 |
| 99.5241757 | 99.7461498 | 99.6458662 | 100.82746  |
| 100.641497 | 100.569256 | 100.75496  | 100.167183 |
| 99.4006945 | 99.4344834 | 100.064966 | 99.6985939 |
| 98.9482075 | 99.2497378 | 100.690842 | 99.9704329 |
| 98.9485403 | 99.2998854 | 99.7306179 | 100.020042 |
| 100.775296 | 100.712838 | 99.0197682 | 99.6192865 |
| 100.063699 | 99.5032526 | 99.3505663 | 99.5636025 |
| 99.1986646 | 99.1082791 | 99.8402184 | 100.809742 |
| 99.1114623 | 98.8590114 | 100.390661 | 100.530479 |
| 100.402523 | 100.954429 | 101.467807 | 98.4654472 |
| 99.1622194 | 99.8925089 | 99.5185167 | 100.083657 |
| 98.7716394 | 98.9679639 | 101.686786 | 100.777007 |
| 100.378725 | 100.933847 | 100.443908 | 99.4181492 |
| 100.382719 | 100.665141 | 100.200524 | 98.0680662 |
| 101.253911 | 101.818209 | 97.3549067 | 100.970044 |
| 100.131264 | 99.9395529 | 99.4803562 | 99.5480785 |
| 99.7167198 | 99.4228858 | 99.9207547 | 99.5968442 |
| 100.189343 | 100.140633 | 99.685136  | 98.8554037 |
| 99.8972819 | 99.8150823 | 100.848587 | 99.854509  |
| 100.362583 | 100.209076 | 99.4319901 | 100.541784 |
| 99.1948371 | 99.0787133 | 99.5613363 | 100.337441 |
| 99.7779612 | 99.8882619 | 99.7430423 | 100.25054  |
| 100.044061 | 99.7391259 | 99.4359836 | 99.3754582 |



100.078177 99.7984209 100.811314 99.8804949  
99.4263227 98.9813584 100.552177 99.7272796  
100.79926 100.661221 99.4925587 98.3442924  
99.6656299 99.8067516 99.7978425 99.8671645  
99.2031579 99.1995902 100.80488 100.959583  
100.200826 99.9522939 98.8740041 100.421811  
101.888291 101.999524 99.4881215 98.4484046  
100.704237 100.759392 100.218051 99.1670652  
99.1023094 99.2022038 99.3241645 100.787975  
98.4356441 98.2005589 99.177513 100.105593  
101.845689 101.71432 98.2434689 100.821216  
99.8025908 100.319825 99.5047612 99.6329544  
99.682438 99.6909385 99.9728926 99.9484968  
99.1432479 99.4689497 99.4630509 100.707992  
99.4674276 99.4939418 99.1397962 100.699218  
99.7731351 99.5532368 99.4364273 100.682006  
101.832375 101.933695 99.9107709 99.2077314  
99.6746164 100.088199 100.92158 99.2733709  
99.4040229 99.7419028 99.6041559 100.703099  
100.380889 100.462754 97.9419568 101.302967  
100.526503 100.926006 100.13219 98.7796398  
100.06222 101.031854 99.8220334 99.8869378  
100.729844 101.414047 98.3551244 100.750987  
99.9972657 99.9656049 100.854936 99.6348813  
100.112443 100.551349 101.12494 99.9600392  
99.5948164 100.009647 100.424708 100.557513  
100.138391 100.087009 101.360499 101.084079  
100.360374 100.608752 101.198274 101.145532  
99.6083764 100.304086 100.886048 99.7208135  
100.838157 101.43747 98.898243 99.8300436  
100.048827 100.141609 100.035147 99.638089  
101.776145 102.122515 99.1515798 100.338715  
100.542347 101.323818 99.5895858 99.3223854  
101.565713 101.525555 100.118037 98.6563689  
100.181247 100.59836 100.826047 99.8849119  
100.196314 100.54838 99.2302475 101.449924  
101.770286 102.39815 100.454487 99.1240155  
100.492459 101.151774 100.107815 99.5844025  
99.5373954 100.018554 99.4993623 100.023686  
100.824764 101.389304 98.5580161 100.06775  
99.530699 100.52908 100.75938 99.2285184  
100.03895 100.541947 100.438709 100.978563  
100.266458 100.203795 99.1075792 99.8151869  
100.85992 100.897748 100.239372 98.7856892  
99.6370032 99.7785495 100.673823 99.8270047  
100.479569 100.337241 99.6893649 100.761285

101.816825 100.940635 99.7355878 99.6421408  
99.910046 99.7983437 100.689379 99.7160864  
99.9893975 99.9121605 99.8958122 100.684807  
99.6750049 99.3018386 101.388722 101.283124  
100.38063 101.383366 100.47182 99.4106811  
99.3668064 99.8258907 99.6644757 99.3259307  
100.967898 100.63201 100.785158 100.860554  
100.382305 100.603639 99.2633591 100.196057  
99.0043677 99.4867497 99.9860357 99.8948726  
99.1101697 99.5347506 99.8351447 100.432582  
99.5407435 99.5693905 99.2133584 100.099827  
100.018192 100.190269 100.972049 99.3630723  
99.2663615 99.5283175 99.5078069 100.506358  
99.4908559 99.9786361 99.0762454 100.505008  
99.0939311 99.6023809 99.6962539 99.4358361  
100.12617 100.462275 100.567599 100.593979  
99.5437569 100.215837 99.2109139 100.104047  
99.6303069 99.834963 100.455153 99.3880585  
99.910883 99.9210679 99.4338059 101.113117  
100.652334 100.619144 99.176469 99.8869378  
99.763229 99.7752504 99.5840301 99.4847955  
99.7076495 100.093608 100.390041 100.580642  
100.072097 100.581535 99.452695 99.6814772  
99.064802 99.4912034 99.7806995 99.5418585  
100.193301 100.658898 99.7549214 100.858191  
99.8179715 100.295838 98.7980194 100.765843  
99.4108348 99.670506 99.6413643 99.8950414  
99.5961556 99.4842754 99.3869163 99.7626822  
100.14425 100.023008 98.5222378 100.015076  
100.23013 100.12 101.300276 100.060659  
99.2815956 98.9163462 100.430708 99.7434361  
99.8136189 99.194455 101.392499 100.186603  
100.320196 99.8404064 100.470931 100.482216  
98.4624674 98.0990097 101.146274 99.455251  
99.2385717 99.0811331 100.826936 100.397128  
99.5062574 100.063586 100.695601 99.7704482  
99.3016846 99.0699163 100.03937 99.6309984  
100.252061 99.9124904 100.504043 101.125104  
100.84117 100.516049 99.3462491 99.7015674  
99.5851067 99.3785412 99.2329142 99.5366249  
99.3087158 99.0542459 100.252484 100.507371  
99.8859392 99.5108326 100.570044 99.7414102  
99.3102224 99.1335877 99.6384753 100.20568  
99.8119448 99.7612295 99.5391406 100.245692  
99.1126808 99.0176266 99.9073679 99.2955422  
100.940778 100.572133 100.169149 100.451659

|            |            |            |            |
|------------|------------|------------|------------|
| 100.456801 | 100.217156 | 99.6291419 | 99.7253718 |
| 99.7389548 | 99.4372641 | 99.544474  | 99.7138917 |
| 99.8762295 | 99.8323238 | 100.482709 | 100.902423 |
| 100.311156 | 100.231507 | 100.264484 | 99.1652089 |
| 100.245197 | 100.114062 | 99.7009206 | 100.209394 |
| 100.052176 | 99.8722421 | 100.28204  | 100.5305   |
| 100.06289  | 99.3310351 | 100.36893  | 99.4638611 |
| 99.8420783 | 99.4374291 | 100.497154 | 99.7876684 |
| 99.4334349 | 99.595288  | 100.298262 | 100.363532 |
| 99.7441445 | 99.4727288 | 100.066259 | 100.189979 |
| 99.0569339 | 99.0755247 | 101.149607 | 100.933824 |
| 99.3564271 | 99.0727205 | 99.7453657 | 99.8243035 |
| 100.478732 | 99.7401157 | 99.3138042 | 99.7834478 |
| 99.7250599 | 99.2302495 | 100.545377 | 100.543669 |
| 99.8784058 | 99.6840321 | 99.3829163 | 99.384682  |
| 99.5643481 | 98.9630275 | 99.2975818 | 99.3608776 |
| 100.195812 | 99.4031191 | 99.9684799 | 99.8531727 |
| 100.106081 | 99.4202741 | 99.8880343 | 100.121774 |
| 100.018359 | 99.5525654 | 99.876923  | 99.4086552 |
| 100.141906 | 99.6081542 | 100.067592 | 99.2256484 |
| 100.735034 | 100.385902 | 100.440709 | 101.173557 |
| 100.363722 | 100.511431 | 100.132482 | 99.6279595 |
| 99.9709826 | 99.2642296 | 99.8035887 | 99.5911555 |
| 99.6612774 | 99.5050593 | 100.861381 | 101.015198 |
| 100.770524 | 100.643227 | 99.5804745 | 99.3492287 |
| 99.5650177 | 99.3407673 | 99.6464754 | 99.8742759 |
| 99.8805822 | 99.2683534 | 99.9422573 | 100.41418  |
| 101.362312 | 101.276147 | 99.9629242 | 98.7136008 |
| 99.087651  | 98.8287843 | 100.045551 | 100.148437 |
| 99.2489278 | 98.8599359 | 100.268039 | 100.110957 |
| 99.5917657 | 98.8651825 | 100.129178 | 99.454377  |
| 99.6424765 | 99.4259114 | 99.9328647 | 100.441188 |
| 99.6321681 | 99.4587025 | 99.427108  | 100.228294 |
| 100.018567 | 99.4208287 | 100.150251 | 99.337209  |
| 99.5008189 | 99.085867  | 99.6735534 | 100.320306 |
| 99.4366407 | 99.1909627 | 99.2833666 | 99.7819072 |
| 99.1212364 | 98.5597329 | 99.3064362 | 99.6336744 |
| 99.884558  | 98.9983146 | 100.347674 | 100.316761 |
| 99.6536162 | 99.104394  | 99.8896091 | 99.5430127 |
| 99.2983084 | 98.4079098 | 99.3716522 | 99.663895  |
| 99.5259249 | 98.9814272 | 100.624065 | 100.704901 |
| 100.442875 | 99.7379192 | 100.052427 | 99.434455  |
| 99.9454109 | 99.5623226 | 99.3871798 | 99.9142699 |
| 99.7412378 | 99.2294923 | 99.9448431 | 100.268475 |
| 99.9763361 | 99.4237799 | 100.016048 | 99.3746892 |
| 99.6529512 | 99.0588143 | 99.88606   | 99.7209596 |

|            |            |            |            |
|------------|------------|------------|------------|
| 100.346608 | 100.405055 | 100.777789 | 101.095573 |
| 100.538145 | 100.482115 | 98.8541389 | 100.568486 |
| 100.786212 | 100.152891 | 100.333034 | 98.8709005 |
| 99.7560353 | 99.2129328 | 99.443301  | 99.5835319 |
| 99.7475558 | 99.9717202 | 100.037122 | 99.1886386 |
| 100.257989 | 99.8210448 | 99.2234743 | 99.2651185 |
| 100.496911 | 100.346031 | 100.655786 | 100.356605 |
| 99.5089659 | 99.4134507 | 100.166223 | 100.899224 |
| 99.6487946 | 99.3521313 | 99.6604659 | 99.6178044 |
| 99.0482462 | 99.1647298 | 100.643808 | 99.1341065 |
| 99.9582133 | 99.590359  | 99.7902324 | 99.4211175 |
| 100.256991 | 99.8223565 | 99.4160168 | 100.355423 |
| 101.24344  | 100.887413 | 98.4320095 | 100.880653 |
| 99.4313202 | 99.3906609 | 100.109214 | 99.2614043 |
| 100.267632 | 99.6256095 | 99.3536845 | 100.536408 |
| 100.073601 | 100.146169 | 99.4816764 | 99.6564665 |
| 99.7849654 | 99.5908509 | 99.9290937 | 99.1872879 |
| 100.039683 | 99.8082563 | 99.8718633 | 100.648512 |
| 98.8237888 | 99.0778332 | 99.6054537 | 100.097957 |
| 99.8702592 | 99.6439726 | 100.179976 | 99.1373142 |
| 99.8567918 | 100.013857 | 99.4093621 | 100.565785 |
| 99.6303392 | 99.4227962 | 98.9078201 | 99.9401009 |
| 100.867848 | 100.615083 | 100.299316 | 99.2931443 |
| 101.287666 | 100.901186 | 99.6209814 | 100.887068 |
| 99.3548384 | 99.6320038 | 99.1045772 | 100.199086 |
| 99.3172626 | 99.7823513 | 100.946374 | 100.024854 |
| 100.555935 | 100.470638 | 100.323495 | 101.482532 |
| 99.5792959 | 100.99546  | 102.859155 | 98.2222556 |
| 102.086569 | 101.836717 | 99.034481  | 100.666576 |
| 98.3023824 | 98.6618773 | 99.9419594 | 100.070438 |
| 99.932276  | 99.86105   | 101.112742 | 99.5842073 |
| 100.214594 | 100.197979 | 100.048878 | 100.070438 |
| 99.0628775 | 99.3057318 | 100.486313 | 100.004087 |
| 99.4053829 | 99.2394936 | 99.8481282 | 100.201281 |
| 100.43689  | 100.131249 | 100.074388 | 101.327884 |
| 99.4151926 | 100.103705 | 98.8379458 | 99.7881539 |
| 98.859702  | 99.0560271 | 100.100563 | 99.0880159 |
| 100.291574 | 100.128954 | 100.812393 | 100.671135 |
| 99.9104953 | 99.3545906 | 100.495186 | 100.576759 |
| 99.7776497 | 100.083046 | 100.951033 | 99.1839113 |
| 99.5252598 | 99.9376174 | 100.037787 | 100.510915 |
| 99.6963463 | 99.2235899 | 99.7904542 | 100.477993 |
| 100.445369 | 100.353573 | 100.025587 | 99.0807562 |
| 100.606147 | 99.9674574 | 100.215245 | 100.60985  |
| 99.4000625 | 99.7049641 | 100.60033  | 100.220021 |
| 99.3280698 | 99.4646049 | 100.790876 | 99.717583  |

98.8580393 99.4223043 99.4794582 100.044775  
99.6211946 99.4823122 100.313735 100.333644  
99.9670253 100.211588 101.028227 98.6524345  
100.549118 100.311928 99.819513 99.7422321  
100.363899 100.287499 99.7028341 100.69207  
101.157481 101.073011 100.10389 99.8114524  
99.9287844 99.8264554 101.091225 100.385137  
99.1909014 100.323405 101.765124 99.2023138  
101.30978 101.318289 100.394257 101.057755  
99.0931377 99.0663563 99.8865036 100.745926  
100.343615 100.256347 101.157106 99.029263  
100.161555 100.345375 98.8375021 99.9784253  
99.6915246 99.7733337 100.531122 100.458915  
101.030289 100.912826 100.502285 100.354579  
99.3821059 99.9571281 102.105844 97.8982709  
101.660598 101.711127 97.3934337 100.825277  
99.6594355 99.3673791 98.6374177 100.167346  
100.478456 101.003002 100.74141 98.8410176  
99.6657536 99.6821743 100.372518 99.7584398  
100.226897 100.050419 101.084348 101.307286  
101.496661 102.403021 100.239424 99.8431925  
99.7169631 100.365542 99.4262207 99.5416621  
99.8735845 100.160269 100.23521 100.806705  
100.86419 101.82065 100.782004 98.6163049  
100.030705 99.9171229 98.3996233 99.7049207  
101.067532 100.623608 99.9355265 100.718745  
99.625185 99.9587677 99.7733738 99.553649  
98.7777334 99.6359387 99.9193334 99.418585  
102.281098 101.756871 100.005401 101.863412  
100.407959 101.800155 98.0779798 99.1928593  
100.064623 100.672795 100.591014 99.2455343  
100.221244 100.542614 100.768694 101.473077  
99.130381 99.4450942 99.0568852 100.528642  
101.014992 101.529136 100.197943 98.8518227  
99.8882158 100.257003 98.5850674 101.393727  
98.5123749 98.4639827 100.690169 101.44809  
101.474881 102.573043 99.9457304 99.6078435  
99.4227754 99.3324714 99.3391382 99.037549  
101.168916 100.551239 100.020965 101.572267  
100.132906 100.750929 97.8892022 100.024172  
98.3946039 98.8577971 99.8836683 98.6304488  
98.9971641 99.6264421 100.265837 100.292086  
100.155087 99.8701628 99.8355367 100.320598  
99.8917484 99.7460928 99.2779202 100.907038  
99.5133346 99.9480749 100.829221 98.7578258  
101.448098 100.933433 99.6432322 100.365644

|            |            |            |            |
|------------|------------|------------|------------|
| 100.845371 | 100.234189 | 100.071315 | 99.7682374 |
| 100.579031 | 100.032698 | 100.815691 | 99.6835444 |
| 99.4426217 | 98.3841049 | 102.036059 | 100.840229 |
| 100.637902 | 100.792013 | 99.9149427 | 98.4332253 |
| 99.9307739 | 99.0533957 | 99.2071645 | 99.4908761 |
| 100.704946 | 99.9505301 | 100.173345 | 101.167022 |
| 101.486957 | 102.280199 | 100.506495 | 98.8870586 |
| 100.650244 | 100.397542 | 99.297439  | 99.6806763 |
| 99.0463629 | 99.8046905 | 98.8354202 | 100.146488 |
| 99.8040245 | 99.8717996 | 100.734954 | 98.8408317 |
| 100.295179 | 99.7650798 | 99.5922171 | 100.441227 |
| 100.09338  | 99.5144845 | 99.0609954 | 100.063651 |
| 100.628897 | 99.9297426 | 99.8484013 | 99.5571797 |
| 100.310689 | 99.5311799 | 100.60298  | 100.53368  |
| 100.160424 | 99.65214   | 99.4418337 | 99.5742195 |
| 100.367559 | 100.29917  | 97.0864917 | 100.764815 |
| 98.706641  | 98.451214  | 99.7973863 | 100.753849 |
| 100.486137 | 100.136144 | 99.9431119 | 98.9393591 |
| 99.666101  | 99.7091009 | 98.1737774 | 100.870091 |
| 99.1159083 | 98.5142311 | 101.19298  | 101.654935 |
| 101.541159 | 102.040734 | 99.8909878 | 99.1134691 |
| 99.0155094 | 99.1936701 | 98.4993864 | 100.098911 |
| 99.5923862 | 98.9553509 | 101.727529 | 101.717865 |
| 101.558003 | 102.708715 | 100.014533 | 98.4921056 |
| 99.9596261 | 100.000125 | 98.8507247 | 99.2944962 |
| 99.5481907 | 99.5611335 | 99.9992284 | 100.611456 |
| 100.095048 | 100.436335 | 100.876465 | 98.5774735 |
| 100.54751  | 100.590686 | 99.3433525 | 100.519677 |
| 99.0341883 | 99.6110561 | 98.9760442 | 99.8892034 |
| 98.031033  | 98.6792214 | 99.8182359 | 100.170445 |
| 100.26616  | 99.9804837 | 101.386394 | 102.103876 |
| 100.650411 | 101.755438 | 99.9621871 | 99.1794352 |
| 100.010826 | 100.454503 | 98.453251  | 100.060783 |
| 98.1095843 | 98.7787393 | 99.977048  | 99.8913966 |
| 99.3365525 | 99.5616245 | 99.8233374 | 99.4443118 |
| 100.216627 | 100.56908  | 100.172458 | 99.7571025 |
| 100.083207 | 99.8154934 | 100.875578 | 99.3697415 |
| 99.8328767 | 99.5814299 | 98.6216006 | 100.496733 |
| 99.0940607 | 98.7662996 | 100.810589 | 100.345567 |
| 99.5370167 | 99.8461017 | 100.253638 | 99.4832841 |
| 100.773491 | 100.687912 | 100.284913 | 100.926271 |
| 100.447778 | 101.402706 | 100.244988 | 99.2772877 |
| 99.8041912 | 100.213565 | 98.6355743 | 99.965967  |
| 99.090892  | 99.482403  | 100.484537 | 100.247209 |
| 99.472141  | 100.053976 | 99.8308788 | 100.126411 |
| 99.6450873 | 99.3966343 | 100.795285 | 100.583113 |

|            |            |            |            |
|------------|------------|------------|------------|
| 100.329034 | 100.825077 | 99.908954  | 99.3748028 |
| 100.035009 | 100.425041 | 98.2591721 | 100.280951 |
| 99.3080338 | 99.3552231 | 100.132089 | 100.611625 |
| 99.9227687 | 100.13418  | 100.684161 | 99.3791893 |
| 100.66442  | 100.273963 | 100.640687 | 100.845796 |
| 101.366045 | 101.972315 | 99.9016344 | 98.8212612 |
| 99.8090277 | 100.202599 | 98.6253713 | 100.198282 |
| 99.3550645 | 99.3755195 | 101.021082 | 100.737315 |
| 99.4843156 | 99.8996254 | 100.504277 | 98.9960461 |
| 100.915084 | 100.643882 | 100.355003 | 100.654984 |
| 100.528998 | 101.441989 | 99.6323638 | 99.6255077 |
| 99.8478865 | 100.284603 | 98.9090593 | 100.062807 |
| 99.4399533 | 99.6853672 | 100.449713 | 100.63187  |
| 99.4047637 | 99.9498754 | 101.998574 | 98.3453268 |
| 101.223785 | 101.077636 | 99.4535893 | 100.340337 |
| 99.4579651 | 99.6554136 | 100.18377  | 99.7523786 |
| 99.2813497 | 99.230662  | 100.171349 | 99.4893577 |
| 100.43477  | 99.6745643 | 101.317191 | 100.82437  |
| 99.9206006 | 100.563187 | 100.896649 | 98.8705249 |
| 100.375564 | 100.197197 | 99.6709577 | 100.151381 |
| 99.4399533 | 99.4717638 | 100.252307 | 99.9705222 |
| 99.3942568 | 99.7559136 | 99.7672209 | 99.9838504 |
| 99.792517  | 99.8082915 | 100.656213 | 100.778986 |
| 100.285506 | 100.480692 | 99.9834803 | 99.0331625 |
| 100.416591 | 99.9827752 | 98.982033  | 99.9570253 |
| 99.6599304 | 99.0263883 | 99.920266  | 100.211273 |
| 99.3500613 | 99.6866767 | 99.7503638 | 99.8529305 |
| 100.562687 | 100.068544 | 101.005334 | 100.657683 |
| 99.6045609 | 100.056923 | 101.202074 | 98.7590068 |
| 101.277487 | 100.777118 | 99.3515593 | 100.422668 |
| 99.379247  | 99.8624698 | 99.6288149 | 99.9197401 |
| 98.801036  | 99.1110113 | 99.5529577 | 100.050491 |
| 99.4843156 | 98.9160675 | 100.975612 | 100.842591 |
| 100.457785 | 100.041209 | 100.644901 | 99.6315813 |
| 100.665254 | 100.077874 | 99.1168901 | 100.412714 |
| 100.773324 | 100.568589 | 99.9548675 | 99.7478234 |
| 100.638069 | 100.050703 | 100.125435 | 100.702392 |
| 100.084875 | 100.19065  | 99.930469  | 100.020967 |
| 99.4758101 | 99.5871587 | 98.8695781 | 100.170782 |
| 99.3003622 | 99.0008541 | 100.88445  | 101.050443 |
| 99.6385831 | 99.5184128 | 101.297672 | 99.1461991 |
| 100.887065 | 100.318812 | 100.984484 | 100.689907 |
| 100.489472 | 100.517193 | 100.106138 | 99.8571482 |
| 100.429433 | 100.022386 | 99.5999803 | 100.126918 |
| 99.5014935 | 99.1789388 | 100.049134 | 100.143789 |
| 99.3535542 | 99.4613856 | 100.083294 | 100.034678 |

|            |            |            |            |
|------------|------------|------------|------------|
| 99.4710561 | 99.5932368 | 100.026998 | 100.081675 |
| 99.3334714 | 99.6516065 | 100.171105 | 100.068799 |
| 99.2938344 | 99.4186945 | 100.273263 | 99.9983032 |
| 99.1793273 | 99.0546867 | 100.265438 | 100.015847 |
| 99.463481  | 99.2509525 | 100.199144 | 100.022124 |
| 99.508403  | 99.3144224 | 100.294564 | 100.017134 |
| 99.4322998 | 98.9940503 | 100.162411 | 99.9760921 |
| 99.5494494 | 99.4615745 | 99.9565751 | 99.9421317 |
| 99.3130363 | 99.2286624 | 100.133285 | 100.044174 |
| 99.3507356 | 98.8814666 | 99.9789627 | 100.028401 |
| 99.5633664 | 99.0847216 | 100.089814 | 99.966918  |
| 99.4555536 | 99.1072006 | 100.106985 | 100.151206 |
| 99.3339999 | 99.1708594 | 99.9574445 | 100.120464 |
| 99.5024134 | 99.2084502 | 100.101986 | 100.113704 |
| 99.4027042 | 99.2991216 | 100.100247 | 100.175026 |
| 99.1816174 | 99.0497754 | 100.016565 | 100.216712 |
| 99.4458645 | 98.9774272 | 99.9439684 | 100.145411 |
| 99.4007663 | 99.37487   | 100.226966 | 100.242142 |
| 99.4458645 | 99.1602811 | 100.121331 | 100.105979 |
| 99.676288  | 99.3975378 | 99.8970195 | 100.178406 |
| 99.3308289 | 99.4415512 | 100.155238 | 100.174865 |
| 99.276394  | 99.3236784 | 99.988309  | 100.21639  |
| 99.7730024 | 99.5363783 | 99.946794  | 100.180659 |
| 99.4953668 | 99.4315396 | 99.9437511 | 100.006834 |
| 99.4978331 | 99.4043382 | 99.968747  | 100.059464 |
| 99.8980793 | 99.5188108 | 99.9441858 | 100.072018 |
| 99.867779  | 99.8265267 | 100.275002 | 100.093907 |
| 99.8513957 | 99.8059368 | 100.001785 | 100.401    |
| 100.049757 | 100.176934 | 100.053516 | 99.982852  |
| 99.8679552 | 99.9511998 | 99.8574607 | 99.8814536 |
| 99.9489909 | 99.9105866 | 99.8202929 | 100.161667 |
| 99.7104639 | 99.6030596 | 100.120244 | 100.15877  |
| 100.200554 | 100.785565 | 99.8478971 | 100.274815 |
| 99.9431775 | 99.9591336 | 99.9576618 | 100.117567 |
| 99.8979032 | 99.9570557 | 100.102856 | 100.098897 |
| 100.263797 | 100.461226 | 99.8781095 | 100.036287 |
| 100.018048 | 100.586466 | 100.026129 | 100.057694 |
| 99.9435298 | 100.032804 | 99.9670081 | 99.8701871 |
| 100.13643  | 100.583255 | 100.083728 | 99.9274852 |
| 100.274367 | 99.9772679 | 100.213055 | 99.6931423 |
| 100.492811 | 100.537541 | 100.111333 | 99.8904668 |
| 99.9114679 | 100.190157 | 100.00548  | 100.042403 |
| 100.235435 | 100.456126 | 99.9802669 | 100.105657 |
| 99.9625556 | 100.266661 | 100.232182 | 100.084089 |
| 99.9047736 | 100.059061 | 99.7670406 | 100.04852  |
| 99.7449922 | 100.363566 | 100.033519 | 100.296865 |



|            |            |            |            |
|------------|------------|------------|------------|
| 99.9993741 | 100.315963 | 100.103942 | 100.112899 |
| 100.005892 | 100.143876 | 99.8750666 | 100.310224 |
| 99.8521003 | 99.7568231 | 100.376507 | 99.9748045 |
| 100.156689 | 100.452726 | 99.9068005 | 100.005707 |
| 100.151933 | 100.356387 | 99.9267973 | 99.7588098 |
| 100.053633 | 100.318419 | 99.7459571 | 99.9213691 |
| 100.117757 | 100.082673 | 99.7553034 | 99.9894509 |
| 99.9599132 | 100.031293 | 100.079599 | 99.9558124 |
| 100.207601 | 100.25986  | 100.066992 | 100.104691 |
| 99.9516334 | 100.266094 | 99.9391866 | 100.086987 |
| 99.8526288 | 99.9880351 | 99.8200755 | 99.9691713 |
| 100.223808 | 100.321441 | 100.074382 | 100.163921 |
| 100.087456 | 99.9425105 | 100.335861 | 99.7972768 |
| 100.416708 | 100.626701 | 100.093727 | 100.055601 |
| 100.211829 | 100.254382 | 100.324341 | 99.7890684 |
| 100.004307 | 100.339764 | 99.8065994 | 100.105174 |
| 100.186637 | 100.303874 | 99.9126691 | 99.7835961 |
| 99.9602655 | 100.049238 | 100.011131 | 99.9694932 |
| 100.180119 | 100.102885 | 100.004611 | 99.9300604 |
| 100.064731 | 100.283284 | 99.8350731 | 99.9099417 |
| 100.17043  | 100.189401 | 99.943099  | 99.8497465 |
| 100.532625 | 100.762897 | 100.140676 | 99.8763032 |
| 100.308367 | 100.224914 | 100.279131 | 99.6432478 |
| 100.430978 | 100.640869 | 99.7589985 | 99.8505512 |
| 100.266968 | 100.535841 | 100.15263  | 99.9382689 |
| 100.271549 | 100.552842 | 99.709876  | 99.8265697 |
| 100.473786 | 100.33202  | 100.35977  | 100.000878 |
| 100.265383 | 100.126309 | 100.318907 | 99.7892293 |
| 100.301144 | 100.46916  | 99.8596343 | 100.053187 |
| 100.099964 | 100.339009 | 100.14198  | 99.9310261 |
| 100.037073 | 99.9353323 | 99.8165978 | 100.189512 |
| 100.135549 | 100.007492 | 99.8396375 | 99.832042  |
| 100.012058 | 100.223592 | 100.010914 | 99.8700261 |
| 100.028441 | 99.9436439 | 100.035475 | 99.9554905 |
| 100.354522 | 100.680727 | 99.8694153 | 99.98591   |
| 100.285113 | 100.245882 | 99.9970033 | 99.9184721 |
| 100.441019 | 100.487483 | 99.7144405 | 100.137525 |
| 100.336729 | 100.368855 | 99.8089904 | 99.8972267 |
| 100.261507 | 99.8102814 | 99.6574932 | 99.864071  |
| 100.640437 | 100.118753 | 99.8535483 | 99.7736172 |
| 100.241072 | 100.253438 | 99.9743982 | 99.9321528 |
| 100.352408 | 100.006736 | 99.8709368 | 99.7810209 |
| 100.325279 | 100.284039 | 100.002437 | 99.8964219 |
| 100.126917 | 99.9196538 | 99.9065832 | 99.697166  |
| 100.452294 | 100.456315 | 99.7931234 | 99.9678837 |
| 100.285642 | 100.398323 | 100.3902   | 99.8548969 |

|            |            |            |            |
|------------|------------|------------|------------|
| 100.110005 | 100.141232 | 99.860069  | 99.9484087 |
| 100.17642  | 100.139721 | 100.084598 | 99.9302214 |
| 100.12128  | 100.10723  | 100.087641 | 99.9496963 |
| 100.219404 | 99.781191  | 100.068513 | 99.9150921 |
| 100.442252 | 100.31313  | 99.9317965 | 100.024377 |
| 100.178357 | 99.7847801 | 99.65858   | 99.8397676 |
| 100.609961 | 100.365832 | 99.738567  | 100.028079 |
| 100.154569 | 100.213357 | 100.098434 | 99.9488754 |
| 100.294637 | 100.182945 | 99.9717285 | 99.8978719 |
| 100.337626 | 100.434745 | 99.8217284 | 100.001971 |
| 100.443161 | 99.8710741 | 99.9647619 | 99.8524996 |
| 100.377444 | 100.046938 | 99.877026  | 100.085475 |
| 100.342559 | 100.31064  | 100.283267 | 99.9686654 |
| 100.107528 | 100.001414 | 100.044878 | 100.09545  |
| 100.328993 | 100.181811 | 100.269769 | 99.8491209 |
| 100.062248 | 100.134398 | 100.064689 | 99.8335141 |
| 100.13836  | 99.7643468 | 100.153078 | 99.8563611 |
| 100.524206 | 100.475359 | 100.10257  | 99.8705198 |
| 100.323179 | 99.8984643 | 100.020059 | 99.7844413 |
| 100.633264 | 100.451557 | 100.074051 | 99.9168574 |
| 100.387838 | 100.45968  | 100.102353 | 99.8817824 |
| 100.592918 | 100.532595 | 99.9347183 | 99.9314988 |
| 100.632207 | 100.497648 | 100.165488 | 99.894654  |
| 100.389953 | 100.584164 | 100.081453 | 99.7733396 |
| 100.504825 | 100.100018 | 100.164182 | 99.780419  |
| 100.500245 | 100.593609 | 99.9501755 | 100.040907 |
| 100.277194 | 100.386388 | 100.027679 | 100.006476 |
| 100.76417  | 101.155013 | 99.9303642 | 99.9511279 |
| 100.465889 | 100.973671 | 100.241903 | 99.9968219 |
| 99.9808508 | 100.346719 | 100.064472 | 100.030449 |
| 100.337273 | 100.400744 | 99.8058357 | 100.114275 |
| 99.7516339 | 100.079617 | 100.277389 | 99.9808934 |
| 99.6910262 | 99.9298214 | 99.8434991 | 100.078717 |
| 99.9309904 | 100.311584 | 100.096039 | 99.9537022 |
| 99.9232382 | 100.356542 | 100.207723 | 99.8491209 |
| 99.856464  | 100.151021 | 99.9493047 | 100.136156 |
| 99.9607656 | 100.256237 | 99.9469099 | 99.9181446 |
| 99.825984  | 100.346719 | 100.092121 | 99.8507298 |
| 99.4806611 | 99.7813476 | 99.9286225 | 100.00004  |
| 99.856464  | 100.08774  | 100.198144 | 100.019025 |
| 99.8790157 | 100.15801  | 100.143282 | 99.8787254 |
| 99.3427081 | 99.4007184 | 100.119334 | 100.024978 |
| 99.865978  | 100.059594 | 100.11498  | 99.9977873 |
| 100.037054 | 99.998958  | 100.393427 | 100.03431  |
| 99.8610448 | 100.145921 | 100.399523 | 99.9245803 |
| 99.8744349 | 99.6967214 | 99.9769535 | 99.8431678 |

99.8744349 99.8848637 100.184646 99.9388999  
99.8399026 100.104741 100.347709 99.9366474  
99.7699571 99.767747 100.148071 99.9643212  
99.9443804 99.9222655 100.14633 99.8771165  
99.8399026 100.040704 100.183122 99.8697153  
99.9997026 100.104552 100.082977 99.9437268  
100.465184 100.257748 100.113238 99.9168574  
100.162498 99.5542924 100.501627 99.9023769  
99.9577705 99.7853145 100.126301 100.050561  
100.125851 100.08264 100.177462 100.080004  
99.7861662 100.192201 100.273035 99.9070428  
99.9708082 99.7817254 99.9651973 99.9084909  
100.083391 99.9322771 100.07318 99.9112261  
99.8901154 99.9895131 100.035299 99.9384172  
99.6610747 99.4498318 100.066866 99.8294917  
100.091495 99.9925355 99.9697692 99.8769556  
99.8855346 99.7329898 99.8711479 100.099633  
99.795504 99.3259148 99.9120768 99.876312  
99.98966 100.006703 100.169624 99.9340731  
99.7863423 99.8975198 100.130655 99.8621533  
99.7711904 99.5102792 99.7026426 99.8573265  
99.9545992 99.8648405 100.108666 100.1117  
99.9500184 99.9987691 100.403006 99.8417197  
100.043749 99.9050758 100.009174 99.7562848  
100.015383 100.363531 100.165705 100.074212  
100.021197 100.349175 100.22514 99.8965847  
100.030711 100.295528 99.8953133 99.9680218  
100.199497 100.253592 100.120422 99.9131568  
99.9824364 100.222046 99.9658504 99.8468683  
99.6041669 99.4913894 100.075792 99.9237759  
100.151222 100.341619 100.05707 99.9516106  
100.059782 100.341241 100.099305 99.9641603  
99.9841983 100.088496 99.7352987 99.9574028  
100.274551 100.366553 99.5746309 99.9491972  
99.927819 100.164244 99.8489417 99.966252  
99.8518832 99.9653342 99.6024974 99.995213  
99.8818347 99.8833525 99.9941523 100.076786  
100.077753 100.216946 99.8149794 100.173162  
99.79938 100.009914 99.9255746 100.172358  
99.9336331 100.307239 99.7396528 100.141144  
100.034763 100.554507 99.7753568 100.155625  
99.7253823 99.8612514 99.7979983 100.248139  
99.7454674 100.074895 99.8652698 100.089658  
99.7142826 99.653086 99.7263727 100.1907  
99.8099512 99.773225 99.9671567 100.170427  
99.6475084 99.2278768 100.003078 100.042677

100.065948 100.068284 99.8202044 100.310727  
99.832679 99.6440189 99.9954586 100.224487  
99.9699273 99.6406187 99.7655599 100.19617  
100.041106 99.9613673 99.6662855 100.347089  
99.8152367 99.4430315 99.6342826 100.251196  
99.9928313 99.6748092 99.7146165 100.158521  
99.766962 99.5165128 99.8008285 100.085314  
99.9253524 99.6188954 99.683049 100.260689  
99.8224603 99.6139841 99.9582307 100.085636  
99.9265857 99.4265974 99.5674465 100.135835  
99.8920534 99.2641452 99.639943 100.292868  
99.7757712 98.8665151 99.6438617 100.150476  
100.156155 99.469855 99.6129473 100.163508  
99.8162938 99.2031312 99.934936 100.181207  
99.6626837 98.8371499 99.7018804 100.189487  
99.794182 98.9731063 99.9098474 100.309878  
99.8712125 99.3834271 99.8898338 100.222965  
99.9036464 99.2201285 99.6470607 100.198501  
100.048541 99.4290602 100.051683 100.082777  
99.8007041 99.652323 100.073219 100.170978  
99.9544126 99.4531967 99.7284202 100.154561  
100.012053 100.032096 99.6163878 100.140719  
99.9789143 99.4424485 99.4297396 100.247107  
99.8414227 99.3888956 99.6181281 100.304084  
99.4379379 98.8052821 99.9120228 100.157619  
100.239796 99.6279979 99.6981823 100.269319  
99.9755651 99.4890244 99.7042734 100.216849  
100.369179 99.9153733 99.3894949 100.390353  
99.910521 99.6528887 99.7514793 100.197052  
99.8470634 97.4868249 100.409969 100.846325  
100.480582 99.924236 99.6622884 100.654955  
100.487104 100.700564 99.7547423 100.034171  
100.479701 100.263467 99.4656335 100.279298  
100.344501 100.383584 99.6213911 100.227954  
100.206657 99.9212189 99.9455237 100.203973  
100.159769 100.007771 99.9890315 99.9062152  
100.040962 99.6879621 99.9339942 100.113197  
100.298846 100.177669 100.000561 100.22377  
100.022806 99.581422 100.196128 100.02226  
100.448677 100.08942 100.159364 99.9797694  
99.8668058 99.581422 99.9259453 100.193189  
100.20084 100.20124 99.8067341 100.180313  
99.8713888 99.5299433 99.662941 99.9400148  
100.335863 100.069621 100.061689 99.8434447  
100.125924 100.155984 100.292933 100.095493  
99.9626973 99.5910389 100.020792 99.9379224

|            |            |            |            |
|------------|------------|------------|------------|
| 100.133857 | 100.208971 | 100.025796 | 99.8429619 |
| 99.9316736 | 99.6745739 | 99.9594462 | 99.9395319 |
| 99.9986566 | 100.016822 | 99.9033212 | 100.030147 |
| 99.5957006 | 99.201649  | 100.20396  | 99.8386162 |
| 100.03303  | 100.012297 | 99.9118053 | 99.855355  |
| 99.5812464 | 99.7417035 | 100.276182 | 99.8511703 |
| 100.003768 | 100.061512 | 100.121295 | 99.9928064 |
| 99.9112261 | 100.170692 | 100.022097 | 100.001337 |
| 99.9637549 | 100.298729 | 99.7675771 | 100.137179 |
| 99.843538  | 100.122042 | 100.056686 | 100.104828 |
| 99.7825481 | 99.782811  | 100.288365 | 99.9865293 |
| 99.9958363 | 100.083009 | 99.8030359 | 100.095975 |
| 100.015226 | 100.438268 | 99.4867347 | 99.8725767 |
| 99.8044058 | 99.9459211 | 100.001431 | 100.298933 |
| 99.7247312 | 99.8827513 | 100.224408 | 99.977838  |
| 99.6850701 | 99.7626344 | 99.9738038 | 100.115611 |
| 99.7807854 | 99.5122181 | 99.9324714 | 99.9063762 |
| 99.6942363 | 99.5682223 | 99.679909  | 99.736252  |
| 99.9491244 | 99.5936788 | 100.185251 | 99.7602335 |
| 99.9679854 | 100.155419 | 100.327739 | 99.865012  |
| 99.7543447 | 99.7060645 | 100.035585 | 99.9950597 |
| 99.937138  | 100.076598 | 99.9781545 | 100.030308 |
| 99.7425346 | 99.9168819 | 100.164585 | 99.9723657 |
| 100.05806  | 100.367367 | 99.8719957 | 100.038194 |
| 99.8861956 | 100.020971 | 99.9605339 | 100.017915 |
| 99.8148058 | 99.9289501 | 99.8324036 | 100.09002  |
| 99.7534634 | 100.05793  | 99.89636   | 100.080685 |
| 99.675904  | 99.7611259 | 100.152185 | 99.8048167 |
| 100.158358 | 100.231034 | 99.8767815 | 100.096136 |
| 99.9149278 | 99.9949484 | 100.250078 | 99.7111438 |
| 99.7740871 | 99.9798631 | 100.398222 | 100.02564  |
| 100.001124 | 100.070941 | 100.259432 | 99.6985897 |
| 99.8690973 | 99.8344783 | 99.8441507 | 99.9210226 |
| 100.11006  | 99.8414552 | 100.173939 | 99.7206398 |
| 99.8761481 | 100.049633 | 99.9633619 | 99.9825056 |
| 100.08644  | 100.432046 | 100.150663 | 100.144582 |
| 99.9106973 | 100.102431 | 100.028406 | 100.074086 |
| 99.9103448 | 100.30778  | 99.9174613 | 99.9118485 |
| 99.9827922 | 100.279872 | 99.952485  | 99.8687139 |
| 99.7411244 | 100.057364 | 100.354279 | 99.6668825 |
| 100.23345  | 100.368687 | 100.105632 | 99.8017586 |
| 99.8754431 | 100.403761 | 100.283579 | 99.7187084 |
| 100.028799 | 100.155419 | 100.123035 | 99.7193522 |
| 100.017694 | 100.452034 | 100.078875 | 99.7537955 |
| 99.9077007 | 100.056044 | 99.9648847 | 99.8473075 |
| 100.168758 | 100.458822 | 100.347318 | 99.8957535 |

|            |            |            |            |
|------------|------------|------------|------------|
| 99.8765007 | 100.384715 | 100.297936 | 99.9905531 |
| 99.8625753 | 100.237445 | 100.170894 | 99.9882998 |
| 100.123457 | 100.376607 | 100.029929 | 99.8659777 |
| 99.7978837 | 100.450337 | 100.043851 | 100.052519 |
| 100.089965 | 100.158058 | 100.08192  | 100.039482 |
| 99.8511176 | 100.263279 | 100.351668 | 99.7805132 |
| 100.027918 | 100.103751 | 100.196781 | 99.9924845 |
| 99.8195651 | 99.7147385 | 100.166543 | 99.9591678 |
| 100.070046 | 100.434308 | 100.191777 | 100.036585 |
| 100.287918 | 100.406778 | 99.9413905 | 99.9298749 |
| 99.939782  | 100.164281 | 100.015789 | 99.8807851 |
| 100.234155 | 100.389241 | 100.122818 | 99.9879779 |
| 99.8588736 | 99.9510124 | 100.190907 | 99.8181756 |
| 100.25848  | 100.391315 | 99.8195689 | 100.227633 |
| 100.083443 | 100.199543 | 100.258997 | 99.8788537 |
| 100.437396 | 100.187475 | 99.9620567 | 99.9025134 |
| 100.031796 | 100.122797 | 100.083008 | 99.8976849 |
| 100.130331 | 100.211611 | 99.9052791 | 99.8481123 |
| 100.364772 | 100.231788 | 100.311206 | 99.8286373 |
| 100.161531 | 100.305895 | 100.075612 | 99.8440885 |
| 100.068636 | 100.297975 | 100.087141 | 99.8949487 |
| 100.20225  | 100.625892 | 99.9244225 | 99.9868512 |
| 99.9357278 | 100.08414  | 99.8970126 | 99.8112547 |
| 100.446691 | 100.975165 | 99.823937  | 99.8683344 |
| 100.070195 | 100.654254 | 100.129057 | 99.7014921 |
| 100.129243 | 100.581784 | 99.9008689 | 99.8966509 |
| 100.340581 | 101.036282 | 100.101022 | 99.9418608 |
| 100.271486 | 100.87488  | 99.7546113 | 99.5816296 |
| 100.497278 | 101.050095 | 99.7522208 | 99.8804011 |
| 100.574657 | 101.400902 | 100.338772 | 99.7169375 |
| 100.296339 | 100.73505  | 99.861751  | 100.011526 |
| 100.504505 | 101.11878  | 99.9884496 | 99.8379263 |
| 100.5283   | 101.027957 | 100.154918 | 99.7956124 |
| 100.414082 | 101.05123  | 100.297047 | 100.113851 |
| 99.8630877 | 100.6552   | 100.17339  | 99.9491008 |
| 99.8255439 | 100.227949 | 99.9341191 | 100.077812 |
| 99.9039804 | 100.267685 | 100.079507 | 100.16067  |
| 99.8597387 | 99.831541  | 100.284442 | 99.9043736 |
| 99.7821835 | 99.6758159 | 99.8391495 | 100.101141 |
| 99.7994571 | 99.8360822 | 99.9923614 | 100.074434 |
| 99.6510447 | 99.8235939 | 99.9478104 | 100.046278 |
| 99.5683779 | 99.5564203 | 99.8682706 | 100.072986 |
| 99.5160281 | 99.3632303 | 100.171    | 99.9899667 |
| 99.63712   | 99.6671119 | 100.076248 | 99.9090393 |
| 99.537532  | 99.6018322 | 99.986711  | 100.109347 |
| 99.7613846 | 99.6232137 | 100.089504 | 99.7948079 |

|            |            |            |            |
|------------|------------|------------|------------|
| 99.8535695 | 99.9995652 | 100.270968 | 99.8635077 |
| 99.6937    | 99.4430796 | 100.013224 | 99.9029256 |
| 99.7827123 | 99.77383   | 99.9399868 | 100.037751 |
| 99.9170238 | 100.180645 | 100.264448 | 99.9674422 |
| 99.9127935 | 99.3899098 | 100.065381 | 99.8845842 |
| 99.9834745 | 99.9596405 | 99.8356724 | 100.00316  |
| 100.021195 | 100.118772 | 100.190993 | 100.108864 |
| 99.8246626 | 99.3738264 | 99.9628056 | 99.9293114 |
| 100.340228 | 100.039301 | 100.071467 | 99.9318856 |
| 100.041993 | 99.8629509 | 100.108194 | 99.9775782 |
| 100.035295 | 99.8459215 | 99.8504502 | 100.059793 |
| 100.202921 | 100.165319 | 100.068641 | 100.035016 |
| 100.039702 | 100.028515 | 100.09472  | 99.8059093 |
| 99.979068  | 100.167589 | 99.9630229 | 100.023753 |
| 99.9995143 | 99.8881167 | 100.241412 | 100.027293 |
| 100.288936 | 100.47412  | 100.130795 | 100.074594 |
| 100.064907 | 100.368348 | 100.16448  | 100.071216 |
| 100.039878 | 99.9471523 | 100.337034 | 100.098728 |
| 100.130477 | 100.312151 | 99.986711  | 99.9997809 |
| 100.051335 | 99.8517872 | 100.036695 | 99.8469361 |
| 100.371251 | 100.376295 | 100.055819 | 99.9605239 |
| 100.318725 | 100.278849 | 100.012138 | 99.9939889 |
| 100.041641 | 99.6989003 | 100.003662 | 99.8741264 |
| 100.113203 | 99.9365561 | 99.8048127 | 99.8715521 |
| 99.8911133 | 99.8744931 | 100.144921 | 99.9711426 |
| 99.9275995 | 99.7515024 | 99.9997503 | 100.022788 |
| 100.157797 | 99.897956  | 99.7391815 | 100.015065 |
| 99.8764836 | 99.7227415 | 99.9845378 | 100.039842 |
| 99.8958724 | 99.7119562 | 99.9332498 | 99.9824049 |
| 100.146517 | 100.114609 | 100.004966 | 100.166301 |
| 100.175424 | 100.078847 | 100.074509 | 100.019409 |
| 100.043404 | 100.072035 | 99.7785167 | 99.9759693 |
| 100.297044 | 100.423978 | 99.962371  | 100.169358 |
| 100.118139 | 100.312718 | 100.139488 | 100.098728 |
| 99.9993381 | 99.8063752 | 99.6963691 | 99.9280243 |
| 100.153038 | 99.9157423 | 99.8578392 | 99.9416999 |
| 100.18124  | 100.1095   | 99.8504502 | 99.8926286 |
| 100.131182 | 100.117069 | 99.9128216 | 100.009434 |
| 100.290346 | 100.139018 | 100.047778 | 100.140237 |
| 100.366315 | 100.770055 | 100.00301  | 100.056897 |
| 99.8678467 | 100.187836 | 99.9438986 | 100.008952 |
| 100.099455 | 100.250088 | 99.9747583 | 100.211511 |
| 100.421661 | 100.649713 | 100.082115 | 100.181264 |
| 100.066494 | 100.044977 | 100.371153 | 100.09004  |
| 100.137351 | 99.835893  | 99.9654135 | 100.011848 |
| 100.287526 | 99.8932256 | 100.16774  | 100.06478  |

|            |            |            |            |
|------------|------------|------------|------------|
| 100.134355 | 100.074495 | 100.122102 | 100.05384  |
| 100.084649 | 100.290769 | 100.210118 | 99.9627764 |
| 99.9055668 | 99.8097811 | 100.197078 | 99.8628641 |
| 100.010443 | 99.9800759 | 99.8137229 | 99.9664768 |
| 100.035472 | 100.083388 | 99.8913067 | 100.006056 |
| 99.8669654 | 99.6099686 | 100.020179 | 99.9491008 |
| 100.111088 | 100.131638 | 100.049517 | 99.9439523 |
| 100.184766 | 100.068629 | 100.08494  | 99.8958464 |
| 99.9632044 | 99.8230263 | 100.217072 | 99.9351034 |
| 99.8482817 | 99.7753437 | 99.9343365 | 100.000585 |
| 99.8590337 | 99.9418542 | 99.7370083 | 99.8551414 |
| 99.8523357 | 100.064656 | 100.026046 | 99.9693728 |
| 99.8477529 | 99.7613417 | 99.7211438 | 99.9439523 |
| 99.9603842 | 99.7000356 | 99.842844  | 100.057218 |
| 100.049396 | 99.9409081 | 99.7204918 | 100.003803 |
| 99.6804804 | 99.6179156 | 99.8408881 | 99.9563408 |
| 99.6697284 | 99.4945465 | 100.008443 | 99.9088785 |
| 99.9746614 | 99.9291767 | 99.8519715 | 99.9663159 |
| 99.8239575 | 99.6525422 | 99.961719  | 99.9746822 |
| 99.9283046 | 99.7149837 | 99.6618149 | 100.01764  |
| 99.9327111 | 99.8735471 | 99.7420067 | 100.217142 |
| 99.8667892 | 100.139964 | 99.8715305 | 99.9175665 |
| 99.7058621 | 99.7255798 | 99.6570339 | 99.9936671 |
| 99.7497513 | 99.2760015 | 100.00953  | 100.120126 |
| 99.8147919 | 99.4322943 | 100.16209  | 100.24385  |
| 99.7860612 | 99.6958728 | 99.7819939 | 100.074434 |
| 99.8407024 | 99.9267169 | 99.8093764 | 100.068159 |
| 100.082886 | 100.148668 | 100.064947 | 99.9204625 |
| 99.9043329 | 99.7861291 | 100.18556  | 99.9418608 |
| 99.9676109 | 100.003917 | 99.8900028 | 100.104681 |
| 99.9549201 | 99.9011727 | 99.7213611 | 100.153752 |
| 100.174777 | 100.117155 | 99.993549  | 100.361948 |
| 100.035777 | 99.9777222 | 100.480839 | 100.151885 |
| 99.9429646 | 99.895881  | 100.151532 | 100.03505  |
| 99.8654032 | 99.8180354 | 100.10389  | 100.036843 |
| 100.12031  | 100.096488 | 99.8508113 | 100.067769 |
| 100.320895 | 100.189352 | 99.9672502 | 100.188937 |
| 100.14413  | 100.046061 | 100.296366 | 100.018316 |
| 100.16127  | 99.9906735 | 99.8441413 | 100.129175 |
| 100.004113 | 99.9937046 | 99.9584839 | 100.111695 |
| 99.9696899 | 100.054603 | 100.024803 | 100.0851   |
| 100.036213 | 100.030905 | 99.6093579 | 100.082561 |
| 99.8206674 | 99.8061863 | 100.050149 | 99.970208  |
| 100.148633 | 100.060115 | 99.8854952 | 100.026833 |
| 99.8548003 | 100.113986 | 100.284741 | 99.8190101 |
| 100.121327 | 100.111644 | 99.976207  | 100.097501 |



|            |            |            |            |
|------------|------------|------------|------------|
| 100.106947 | 100.090426 | 100.16411  | 100.029223 |
| 100.084144 | 100.205059 | 99.8736798 | 99.9690128 |
| 100.037229 | 100.068932 | 99.7915437 | 100.020408 |
| 100.020671 | 100.177641 | 100.17745  | 100.023844 |
| 99.862934  | 99.9785489 | 100.081021 | 99.8929656 |
| 100.120455 | 99.9888823 | 99.8677721 | 100.086445 |
| 99.9996106 | 100.147605 | 99.4003015 | 100.094812 |
| 99.8681629 | 100.04923  | 99.8102197 | 100.181766 |
| 99.698806  | 99.9297748 | 100.320759 | 100.062242 |
| 99.7709933 | 100.043994 | 99.9752542 | 100.224944 |
| 99.8258963 | 100.113986 | 100.16735  | 100.049691 |
| 100.05829  | 100.084915 | 100.127139 | 100.015328 |
| 100.07296  | 99.9322548 | 100.428432 | 100.152781 |
| 99.9823263 | 99.9102101 | 100.559164 | 100.155769 |
| 100.051609 | 100.151049 | 100.3442   | 100.079423 |
| 100.089373 | 100.383622 | 100.319044 | 100.136944 |
| 100.24406  | 100.441765 | 99.9150337 | 100.172502 |
| 100.363307 | 100.568384 | 100.091884 | 100.149643 |
| 100.281533 | 100.398502 | 100.15077  | 100.104822 |
| 100.179716 | 100.29682  | 100.018514 | 99.9634848 |
| 100.132366 | 100.327821 | 100.09417  | 99.9736443 |
| 100.176811 | 100.300403 | 99.7288459 | 100.024591 |
| 100.215301 | 100.321896 | 99.9481931 | 100.120509 |
| 100.383496 | 100.394368 | 100.153819 | 100.05507  |
| 100.296929 | 100.458712 | 100.024231 | 100.017569 |
| 100.290829 | 100.452098 | 99.6998791 | 100.20313  |
| 100.00542  | 100.054741 | 100.166206 | 100.090778 |
| 99.8282202 | 100.054052 | 99.8845424 | 100.009352 |
| 100.031565 | 100.052261 | 99.9203697 | 99.96468   |
| 100.242607 | 100.126524 | 99.8207011 | 99.9422693 |
| 100.052044 | 99.999078  | 99.8986446 | 99.9050674 |
| 100.134399 | 100.066315 | 100.043479 | 99.9640824 |
| 100.023431 | 99.8906453 | 99.8710118 | 100.068965 |
| 99.9990296 | 100.03435  | 99.7995477 | 99.9673693 |
| 100.153281 | 100.133276 | 99.9729673 | 100.035498 |
| 100.388725 | 100.374252 | 100.088453 | 100.197901 |
| 100.151683 | 100.086706 | 99.9386645 | 99.9579568 |
| 99.8780396 | 99.9908113 | 99.8820649 | 99.8851965 |
| 99.8004782 | 99.9205436 | 100.142575 | 99.8376857 |
| 100.076591 | 100.070448 | 99.8708213 | 100.054323 |
| 100.127282 | 99.9339082 | 100.027661 | 100.114832 |
| 100.029531 | 99.9946691 | 100.036618 | 100.074045 |
| 99.8170363 | 99.8231332 | 99.9674407 | 99.8070577 |
| 99.8905308 | 99.8377379 | 99.8079328 | 99.9637836 |
| 100.043911 | 99.8741118 | 99.7602901 | 100.048795 |
| 100.157638 | 100.042065 | 99.9506705 | 100.0727   |

99.9885719 99.8767296 99.9598179 100.005916  
99.8807993 99.8110086 100.282264 100.001583  
100.026481 100.044132 99.8401393 100.112442  
100.061631 100.10076 99.7092171 99.9911247  
100.050302 99.842698 99.9716333 99.800185  
99.6006196 99.6266592 99.6926374 99.8600965  
99.8016402 99.6164635 100.351822 99.9188127  
99.9386073 99.7826259 100.294842 99.8968501  
99.9754998 99.9829578 100.005174 100.031613  
99.7230621 99.7253095 100.025946 99.9485443  
99.9740473 99.9329437 100.153629 100.109005  
99.7616975 99.7925461 100.004602 100.122153  
99.5704084 99.6728154 100.279405 99.9655764  
99.8038189 99.8495869 100.143909 100.006364  
99.9644611 99.8158309 100.149817 99.8953561  
99.9532771 99.8688761 100.058153 99.7489391  
99.8211032 99.7687102 100.224902 99.8929656  
100.141371 99.8967076 100.020419 99.974989  
100.038682 99.9476862 99.7913532 99.9927682  
100.008035 99.9676642 100.052054 99.9336038  
99.9634443 99.9191658 100.101412 99.9123882  
99.8957597 99.8770051 100.056056 99.9171692  
99.6771643 99.7317852 99.8193671 99.8893799  
99.9946722 99.7470788 99.8729175 99.9824592  
100.132947 99.9249525 99.8288956 99.975736  
100.059016 99.9862645 99.9996472 99.9228466  
100.006147 99.990949 99.9203697 99.9010335  
99.9306187 99.9147568 100.104461 99.8364905  
99.8765872 99.8984988 99.9929773 100.052978  
100.061631 99.9248147 100.018133 99.9926188  
100.069329 99.9483751 100.1542 99.9790229  
99.9932198 99.7924083 99.8999786 99.892368  
99.8957597 99.7924083 99.980209 99.8205041  
99.7811605 99.740052 99.6562383 99.9070097  
99.8447783 99.9602241 100.012034 99.9412234  
99.7051968 99.550467 99.9041712 99.8678655  
99.8572694 99.8269911 99.6966394 99.9567615  
100.000192 99.8829297 99.798976 99.8919197  
99.8639508 99.8837563 100.158393 99.8880352  
100.233405 100.292327 99.9417526 99.8719084  
100.205528 100.094179 100.125778 99.9386234  
100.521378 100.365992 100.127494 100.030768  
100.451611 100.445334 100.282723 99.8303237  
100.300546 100.466104 99.8208492 99.9404184  
100.124522 100.29385 99.9873298 99.9386234  
100.127003 100.114257 99.7413275 100.202641

|            |            |            |            |
|------------|------------|------------|------------|
| 100.309157 | 100.272664 | 100.122154 | 100.168386 |
| 100.241433 | 100.306173 | 100.035958 | 100.072053 |
| 100.14481  | 100.070778 | 99.8473564 | 100.056048 |
| 100.110218 | 99.8792768 | 100.212355 | 99.8192544 |
| 100.295583 | 100.16909  | 99.9400363 | 99.9176815 |
| 100.229465 | 100.221708 | 100.280816 | 100.050812 |
| 100.187283 | 100.181414 | 99.9211571 | 99.9399697 |
| 100.036947 | 100.154551 | 99.8385842 | 99.8041463 |
| 100.238222 | 100.148458 | 99.784807  | 99.9995046 |
| 100.089346 | 100.116611 | 99.9945763 | 99.9576207 |
| 100.21808  | 100.275849 | 99.9608225 | 99.9935212 |
| 100.31339  | 100.256463 | 99.9615853 | 99.9718313 |
| 100.387244 | 100.306173 | 100.098889 | 100.124558 |
| 100.326818 | 100.267264 | 100.068568 | 100.122763 |
| 99.9930145 | 100.15469  | 99.9541481 | 99.8038472 |
| 100.069204 | 100.163967 | 100.176122 | 99.9037701 |
| 100.166119 | 100.067732 | 100.031572 | 99.9665959 |
| 100.237784 | 99.9953129 | 100.301221 | 99.9389226 |
| 100.047748 | 100.017329 | 100.379026 | 100.012668 |
| 99.7675111 | 99.9458799 | 100.038247 | 100.013865 |
| 99.916825  | 99.8427213 | 99.9762692 | 100.008629 |
| 99.8169905 | 99.677529  | 100.119484 | 99.9924741 |
| 99.9502491 | 100.002236 | 99.7746999 | 100.017754 |
| 99.9950579 | 99.8814923 | 99.8813009 | 100.072652 |
| 99.9908251 | 99.9858971 | 100.201485 | 99.8523128 |
| 99.7857557 | 99.8817692 | 99.9615853 | 99.7347388 |
| 99.5998066 | 99.8369056 | 100.043014 | 99.7818581 |
| 99.9174088 | 99.8295668 | 99.8954126 | 99.8553045 |
| 100.079859 | 99.8572604 | 99.854603  | 99.8484235 |
| 99.957401  | 99.9522494 | 100.083442 | 99.8394484 |
| 99.9266041 | 100.215754 | 100.179173 | 99.9262078 |
| 99.798162  | 99.934664  | 99.9501434 | 99.8258362 |
| 99.8385921 | 99.7968884 | 100.12921  | 99.9018255 |
| 99.8851523 | 99.8694456 | 99.8418261 | 100.025383 |
| 99.8826711 | 99.8418905 | 100.643526 | 99.9625571 |
| 99.7771442 | 99.9745427 | 99.9240176 | 100.087909 |
| 99.6806668 | 99.496136  | 99.924399  | 100.145201 |
| 99.6479724 | 99.7185155 | 99.9329804 | 99.9475985 |
| 99.4661101 | 99.6588358 | 99.9366037 | 99.9665959 |
| 99.7923238 | 99.7884418 | 99.7373228 | 99.9015263 |
| 99.8704107 | 99.7023148 | 100.045493 | 99.9643521 |
| 99.7661975 | 99.7217003 | 100.01479  | 100.060984 |
| 99.5404022 | 99.7254389 | 100.108042 | 100.053804 |
| 99.7175938 | 99.7413627 | 99.9739808 | 99.9498423 |
| 99.7759766 | 99.8051965 | 99.9863763 | 99.9876874 |
| 99.9460164 | 99.9788353 | 99.8776776 | 99.8841744 |

99.8089628 99.7535479 100.288063 99.9665959  
99.568134 99.5746473 100.007353 99.9238145  
99.5516409 99.6672824 100.043586 100.113937  
99.8115901 99.6524663 99.6086007 100.0372  
99.8289589 99.6528817 99.9179152 100.089256  
99.7390495 99.6199264 99.9104779 99.963305  
99.8197637 99.7633791 99.8719566 100.070408  
99.8276453 99.7117306 99.8649007 100.071156  
100.114305 99.8355209 99.9406084 100.066668  
99.903251 99.9035087 100.175931 100.051411  
99.7952429 99.8993547 99.530414 99.9659975  
99.7259134 99.8590605 99.4768274 100.15971  
99.8822332 99.7672562 100.025279 99.9767676  
99.8415112 99.884954 99.8065467 100.057992  
100.046289 99.9917128 100.171927 99.9522357  
100.131236 100.061639 99.7153924 99.8508169  
100.07621 99.9781429 99.9285943 99.8599416  
99.8615073 99.9054472 99.9249711 100.04797  
99.8562529 99.8852309 100.082489 99.9941195  
99.9414917 99.9310638 99.8465936 100.167489  
100.079859 100.085594 99.8338167 100.137273  
99.7021224 99.9205402 99.8248539 100.100774  
99.8242883 100.156074 100.231806 99.9772164  
100.305654 100.421656 100.146564 100.219844  
100.343457 100.362391 100.133787 100.053954  
100.207425 100.294958 100.399431 100.149539  
100.196624 100.23417 100.268993 99.843936  
100.343165 100.208969 100.008497 100.092995  
100.151524 100.108718 99.9890461 100.085815  
100.033299 100.211323 100.100987 99.9912774  
100.304195 100.102903 99.6562756 99.9894824  
100.312076 100.304789 100.323533 100.032563  
100.161887 100.03533 99.7998722 99.9477481  
100.233697 100.121596 99.8296213 100.095987  
100.160865 100.151228 100.325249 100.094491  
100.099855 100.165352 100.155336 100.16719  
100.220269 100.148874 99.8416354 99.9498423  
100.166995 100.255079 100.066851 100.084619  
100.079567 100.103041 100.043777 99.944906  
100.283469 100.225308 99.7878582 99.960762  
100.321709 100.204676 100.429943 100.046175  
100.047748 100.17186 100.009832 100.247517  
100.000312 100.107333 99.9169617 100.024635  
99.7886748 100.094179 100.043395 99.9218699  
100.41264 100.418609 99.7981559 100.191273  
100.228881 100.283465 100.209304 99.8259858

99.9790275 99.9837855 99.7833399 99.8917209  
100.021645 99.98558 99.7650269 100.04798  
99.9007748 100.030581 100.049451 100.073999  
99.702234 99.7885985 100.157803 100.037513  
100.001282 100.011531 99.8495339 100.005663  
99.7624508 99.7601625 100.302782 100.084466  
99.6139452 99.6893485 99.93881 100.106447  
99.9785911 99.8173106 99.6265346 100.005364  
99.8484124 99.7216496 100.112593 100.027345  
99.8030316 99.701634 100.267491 99.8782631  
99.7543055 99.6290255 100.111639 99.9454024  
99.7180882 99.5573833 99.9727654 99.8997956  
99.8888478 99.7877703 100.129762 99.9625984  
99.6601986 99.7133673 99.9958474 99.87288  
99.9032474 99.9184931 99.9615105 99.9250662  
100.127388 99.9952427 99.8319839 99.989514  
100.315747 100.245645 100.107252 100.085662  
100.295238 100.381061 100.43021 100.141437  
100.0055 100.150813 99.8010807 100.189436  
100.062953 100.179111 100.012825 100.007308  
100.024554 100.172761 99.6988329 99.9225242  
100.051898 100.202301 99.9912692 100.061139  
100.075025 100.175522 99.9439605 99.9974391  
99.9813547 100.007252 100.051359 100.039756  
100.133497 100.152193 99.8728067 100.059644  
100.211167 100.147638 100.280463 100.241174  
99.9436829 99.9716381 100.065475 100.069363  
100.175968 100.248268 99.5805612 100.055307  
100.10877 100.058188 100.090656 100.081924  
100.046517 100.148052 100.078065 99.9053282  
100.040262 99.9091065 99.7974562 100.004018  
100.175968 100.126794 99.9758176 100.03871  
100.087679 100.126932 100.302972 100.029439  
99.9876091 100.100704 100.000998 99.9796449  
100.243167 100.090075 99.9197339 99.9628975  
100.250439 99.8645199 100.168867 99.9929532  
100.334801 100.066471 100.249559 100.019121  
100.311383 100.180215 100.486866 100.097176  
100.055244 100.17566 100.24231 100.000579  
99.7307424 99.9408554 100.085505 99.9516827  
99.9422283 99.9771596 100.107061 100.015981  
100.149642 99.9938624 100.091419 100.045289  
100.253203 100.185184 99.7324068 100.052616  
100.339164 100.236673 100.362871 99.9913083  
100.160987 100.227148 100.046399 100.06413  
100.131897 100.117269 100.402549 100.014785

99.8761935 99.9474813 99.8249258 99.8127687  
99.9899363 100.00532 99.7406095 99.8707866  
99.8994657 100.01236 99.7697959 99.9959438  
99.9649187 100.088281 99.9283181 100.063083  
100.175532 100.26994 99.8420942 100.317883  
100.115752 100.030443 100.183175 100.165362  
100.096261 100.062744 100.385953 99.9823365  
99.9268105 100.05598 100.197291 100.033626  
99.8840479 99.9612852 99.9157279 99.870039  
99.8801207 99.7456684 99.8188214 100.000878  
100.190223 100.018433 100.022745 99.9175897  
99.9580825 99.967911 100.216367 99.9857757  
99.8770662 100.011117 99.9454866 99.9687292  
99.801868 99.8715599 100.200152 99.9942989  
99.9074655 99.8745967 99.8426665 100.105699  
100.16855 99.9901353 99.9353763 100.106746  
100.051898 100.071578 100.162 100.044242  
99.9506645 100.006148 99.9792513 99.9642433  
99.8609212 100.036102 99.8815817 99.9247672  
99.7519783 99.8634156 99.8459095 100.021813  
99.8185949 99.7308982 100.036098 99.9471968  
99.810886 99.8486454 99.7459508 99.9820374  
100.014808 99.9085543 99.7810508 100.071307  
100.085498 99.9750891 100.115073 99.9288045  
99.9028111 99.9191833 99.8998948 99.9486921  
99.779614 99.9300884 100.087031 99.8425253  
99.9432465 99.8675568 100.020646 100.013738  
99.9912454 99.8268353 100.003859 100.008654  
100.088261 100.091732 99.7615932 100.180764  
100.012627 100.168482 99.9605567 99.9373278  
99.9172108 99.8678328 100.060897 99.8828986  
99.7746687 99.9461009 100.11946 99.9871215  
99.8113223 99.8411913 99.9224045 99.8977021  
100.037935 99.886192 99.6458014 99.9189355  
99.8807025 100.01236 99.9565507 99.9836823  
100.111388 100.107192 100.295723 100.261062  
99.8104496 100.062468 99.9281274 100.069363  
99.6274721 99.8839834 99.9342317 99.8683941  
99.9467373 99.9702577 99.7152383 100.020616  
100.243458 100.237087 99.7652177 99.9724675  
99.9752458 100.024507 100.436696 100.037214  
99.882157 99.6861736 100.141398 99.9980372  
99.9474646 99.7580919 99.9153464 100.002673  
100.070807 100.037207 99.8853969 100.041999  
100.220913 100.232117 100.260433 100.007458  
99.9413556 100.038035 99.7352682 100.058149

99.87183 99.8019883 99.766553 99.9621499  
100.079534 100.066885 99.9000855 99.9931027  
100.153714 100.187669 100.290764 100.005215  
99.9825183 100.159095 99.9059991 99.8332544  
99.8703755 99.9574201 99.5988743 99.8936648  
99.9527008 99.7687209 99.8367529 99.9890654  
100.150223 100.082345 100.148647 99.724097  
100.002154 100.142806 100.064903 99.9473463  
100.039971 99.9944145 99.7926872 99.9062254  
100.061338 99.9999721 99.7472531 99.8699485  
100.057558 100.001903 100.054562 99.9140206  
99.8149065 100.03376 100.05399 99.8654666  
99.722731 99.773384 100.101811 99.9058037  
99.8569235 99.6612622 99.4372772 99.9554035  
99.9780311 99.8952975 99.63618 100.12706  
100.060029 100.048103 99.9019552 100.043548  
99.9854458 100.059274 99.3829791 99.9326952  
99.9027204 99.8393056 99.7453479 100.028309  
99.8215943 99.9987309 99.9812115 100.096733  
99.7769605 99.8260661 99.7356314 100.221031  
99.6567252 99.8035866 99.9707329 100.22133  
99.8922526 99.8562686 100.425885 100.064762  
99.6874019 99.734493 100.372349 100.072531  
99.5181711 99.5426585 99.9922617 99.9418084  
99.5796699 99.4543954 100.155347 99.8919098  
99.8183958 99.8657845 100.172493 99.882946  
99.686675 99.5598974 99.5845491 100.204896  
99.4991254 99.2614576 99.7613516 99.9004255  
99.8790223 99.7311832 99.7141026 99.9325458  
99.682168 99.6256811 100.160872 99.8503775  
99.8605581 99.616441 99.9754959 99.8334957  
99.8407855 99.6749154 100.162015 100.093894  
100.134177 99.9899046 99.9539672 100.041755  
100.151042 99.8559928 100.323576 100.041755  
99.7592232 99.6913268 100.009789 100.078506  
99.7544254 99.5705166 99.9210072 99.9455433  
99.8234844 99.7655231 99.6725693 99.9643673  
99.8538703 99.9914216 100.504951 100.01083  
100.027899 100.119127 100.009599 100.038767  
99.9691624 99.83241 99.9069087 100.053109  
100.07704 99.7946223 99.7684008 100.069094  
99.9376134 99.900814 100.205644 99.8234861  
99.6980152 99.8609576 99.8480381 99.9452445  
99.9880628 99.8467528 99.8066953 99.848286  
100.036622 100.005075 99.7821182 100.066106  
100.076313 100.067273 100.065993 99.9379241

99.9809388 100.018728 100.019887 100.066853  
99.9738148 99.9234314 99.8358448 99.8499294  
100.073405 100.030451 99.8236516 99.9905117  
100.016849 99.9293616 99.9562534 99.8010766  
99.743376 99.7794521 99.9251987 99.9833407  
100.073405 99.8984695 100.008456 100.108685  
100.027754 99.9158463 100.289854 99.8636739  
99.8497995 99.6837417 99.9615879 100.001567  
100.105826 99.8697839 99.9749243 99.9573456  
100.168052 99.9751481 99.8562305 99.90177  
100.090125 99.9694937 100.056276 100.036974  
100.289451 100.221182 99.803647 99.9961888  
100.072242 100.007695 100.164682 99.9833407  
100.10917 100.018452 99.9194831 99.9404638  
100.010452 99.8297897 100.048084 99.9168591  
100.325943 100.237455 99.7722112 99.9930515  
100.13534 100.185463 100.005598 100.069543  
100.336556 100.263107 99.6740935 100.107938  
100.365634 100.175671 100.157061 100.029355  
100.269678 100.170706 99.9090045 100.079702  
100.042147 99.8990211 99.8198412 100.066704  
100.146244 100.189048 99.861565 100.084183  
100.181719 100.29193 99.6544699 100.126015  
99.8737884 99.7093932 99.813935 99.9961888  
100.15962 100.180774 99.7350598 99.9824443  
100.150751 100.092511 100.265467 99.9742275  
100.083146 100.092235 99.9467274 100.090906  
100.31751 100.244213 99.9899754 100.068347  
100.147407 100.113887 100.107145 100.016357  
100.166744 100.251108 99.6788565 99.9836395  
100.271423 100.125747 99.8941439 100.109432  
100.163836 100.144227 100.053037 99.8819003  
100.230714 100.237455 99.9034794 99.9655625  
99.9765772 99.9143293 100.17497 99.8151199  
100.484706 100.480317 100.754722 99.8665124  
100.538935 100.638501 100.626502 100.042502  
100.290759 100.691459 100.351201 100.03548  
100.602179 101.067819 99.4927185 100.275411  
100.432948 100.903153 100.170398 100.35743  
100.225626 100.693114 100.082759 100.183084  
99.869136 100.376194 100.037796 99.9863286  
99.7720173 100.166155 100.299189 99.6725954  
99.7869922 99.8391677 100.020649 99.627627  
99.6983059 99.576171 100.343009 99.8941508  
99.8797493 99.7209777 99.985784 99.8950472  
99.9988214 99.9064683 100.235746 99.8965411



99.8365692 99.8248249 100.099143 100.025769  
99.675044 99.3963347 100.480374 99.9234326  
99.9636377 99.6830522 99.9937858 100.038916  
99.9395034 99.8125508 100.092285 99.9697456  
100.122982 100.109612 99.8964302 100.049374  
99.9605846 99.9471521 100.344342 99.9923045  
100.060611 100.169189 100.14201 100.023827  
99.9800665 100.171396 100.36549 100.012921  
99.8197043 100.108922 99.8756635 100.020391  
100.031243 100.07734 100.100667 100.065509  
100.150315 100.3362 100.030937 100.060579  
100.02281 100.066859 100.082568 100.017851  
99.9203123 100.216217 99.7964072 100.01561  
99.9736694 100.17967 99.7805941 100.004704  
99.9140607 100.224767 99.7158173 100.097928  
99.8910895 100.113611 99.990928 99.9790082  
99.7935346 100.123541 99.7775457 100.052213  
99.6982539 99.5600197 100.402653 99.8834955  
99.6441482 99.5389567 100.356113 99.8233761  
99.5344246 99.66488 100.256687 99.9476552  
99.7111922 99.554413 100.636121 99.9216357  
99.7153929 99.5779005 100.461308 100.123003  
99.9316475 99.8573259 100.223417 99.9904821  
99.7489989 99.8329293 100.358805 99.8608699  
99.5041792 99.6901859 100.884012 99.7243084  
99.4549464 99.4243983 100.559195 99.6131199  
99.810834 99.6488176 100.258033 99.8765462  
99.8032726 99.9043009 100.629774 100.165669  
99.8810705 99.7726194 100.443231 100.086479  
100.222507 99.9853707 99.9230236 100.06353  
99.8970334 99.8980881 100.894782 99.6734009  
99.5992842 99.4725856 100.779009 99.5890398  
99.7145528 99.5772944 100.097836 100.037673  
99.9123241 99.9426386 100.593043 99.939413  
99.7948711 99.7658005 100.341305 100.068056  
100.082202 100.243885 99.7999432 100.274756  
99.8580504 100.014313 100.355728 99.8340425  
99.6085258 99.584871 100.200339 99.6452805  
99.8693084 99.8264134 99.6722473 99.9573518  
99.8104979 99.9724904 100.164184 100.039612  
99.8259567 99.8292925 100.098413 99.8855964  
99.7842852 99.8130785 99.9147541 99.6653203  
99.6051652 99.9459723 100.60112 99.5064565  
99.346231 99.6627585 100.315342 99.5622124  
99.6520456 99.6556365 99.8662912 99.7727918  
99.5465228 99.7579208 100.06072 100.007128

99.36337 99.6048732 100.174377 100.029107  
99.7127044 99.7071575 100.033604 99.8999798  
99.6817869 99.6994293 100.465154 99.7496814  
99.2775067 99.5759306 99.8978306 99.8114169  
99.6856516 99.8173214 99.9626401 99.744025  
99.536945 99.5386536 100.388998 99.5365162  
99.5725674 99.6142682 99.7397492 99.6738857  
100.136476 99.9143021 99.925716 99.8196591  
99.8093217 100.025375 100.035334 100.128821  
100.039691 100.286617 100.060912 100.212213  
99.9760075 99.9862799 100.841511 99.7533985  
99.8269648 99.7848935 100.236109 99.9211509  
100.176299 100.065683 99.96014 100.231444  
100.478417 100.316014 99.8622526 100.263605  
100.4475 100.247825 99.9407164 99.8670112  
100.057502 100.151147 99.579937 99.8526278  
100.164705 100.100232 99.8116743 100.140296  
100.231581 100.133266 100.264572 100.025229  
99.9492907 99.8905115 100.761317 99.5232641  
99.7752116 99.7756501 100.211493 99.6656436  
100.383648 100.128569 100.12726 99.7500046  
99.9926424 100.050075 99.804751 100.022643  
99.9803762 99.8802073 100.413422 99.542819  
99.6849795 99.7062483 100.380152 99.7587316  
100.437082 100.263735 100.143991 99.9377969  
100.271908 100.232217 99.8930227 100.128983  
100.183693 100.278434 99.8070588 100.468205  
100.037002 100.000372 100.337458 99.9565438  
99.9592045 100.002948 100.135337 100.021835  
100.687951 100.433148 100.218417 100.043006  
100.156808 100.218124 100.141107 100.181668  
100.308875 100.507096 100.115144 100.219808  
100.204528 100.252371 100.840742 99.7331971  
100.083379 100.090837 100.254956 99.8603851  
100.604608 100.392689 99.7772502 99.8636173  
100.032802 100.248431 99.8287902 99.9542812  
99.9639093 100.056288 100.282457 99.6961881  
100.038515 99.843385 100.205147 99.7031374  
100.347186 100.151147 99.7176332 99.9995324  
99.9731509 100.042953 99.7259026 100.031693  
99.9447539 99.9159689 99.8730222 99.7222075  
100.352563 99.9643077 99.5926296 99.94814  
100.370206 100.05553 99.6799398 100.401136  
100.334752 100.368747 100.32265 100.324856  
100.064055 99.9629439 100.101875 100.101832  
100.540924 100.141449 99.6993634 100.219324

|            |            |            |            |
|------------|------------|------------|------------|
| 100.276949 | 100.218579 | 99.6705164 | 100.203324 |
| 100.253929 | 100.253734 | 100.051873 | 99.882041  |
| 100.000372 | 100.046893 | 100.09899  | 99.8330728 |
| 100.263339 | 100.20388  | 99.7643653 | 99.8755765 |
| 99.6735534 | 99.9170296 | 99.6162841 | 100.029269 |
| 100.003396 | 100.035982 | 99.7305181 | 99.9785229 |
| 100.405492 | 100.048257 | 99.5514746 | 100.202516 |
| 100.414062 | 100.241157 | 99.2095418 | 100.42958  |
| 100.264179 | 100.234641 | 99.5282047 | 100.128983 |
| 100.113792 | 99.92597   | 99.5526285 | 99.8375979 |
| 100.308707 | 100.179332 | 99.5768599 | 100.255201 |
| 100.233261 | 100.092656 | 99.9932179 | 100.408732 |
| 100.349706 | 100.042044 | 99.4439716 | 100.236131 |
| 100.528826 | 100.490276 | 99.754365  | 100.54497  |
| 99.7085037 | 99.728372  | 99.4770494 | 100.121387 |
| 100.172603 | 100.104475 | 99.1689638 | 100.426186 |
| 100.017847 | 100.339956 | 100.350151 | 100.493255 |
| 99.7511833 | 99.96552   | 99.7403261 | 100.124781 |
| 100.151263 | 100.100384 | 99.147617  | 100.341178 |
| 100.210409 | 100.272676 | 100.660929 | 100.162921 |
| 99.9657576 | 99.932789  | 99.1405014 | 100.347158 |
| 100.135132 | 100.349806 | 98.4720209 | 100.780761 |
| 100.039355 | 100.508612 | 99.4814726 | 100.284938 |
| 99.7489989 | 100.09508  | 99.2699282 | 100.189426 |
| 100.143337 | 100.254747 | 99.3175414 | 100.652426 |
| 100.384018 | 100.319143 | 99.4188552 | 100.469051 |
| 100.435256 | 100.547567 | 100.367275 | 100.033899 |
| 99.8266421 | 99.9403593 | 99.7869362 | 100.096641 |
| 100.4452   | 100.521748 | 99.1316711 | 100.718563 |
| 100.410985 | 100.675145 | 100.003817 | 100.10602  |
| 100.015412 | 100.094819 | 100.348977 | 99.651464  |
| 99.518543  | 99.7003923 | 100.675839 | 99.843571  |
| 99.442361  | 99.4862445 | 100.816639 | 99.8836741 |
| 99.704616  | 99.628554  | 100.165803 | 100.20272  |
| 99.852598  | 99.7972904 | 99.3647313 | 100.292306 |
| 99.5797246 | 99.6561958 | 99.5170872 | 100.062198 |
| 99.8559689 | 99.749297  | 99.6289946 | 100.292791 |
| 100.255756 | 100.189591 | 99.3233198 | 100.507375 |
| 100.485651 | 100.2227   | 99.5190133 | 100.114267 |
| 100.309016 | 100.319143 | 100.441623 | 100.323677 |
| 100.369692 | 100.296817 | 99.6355434 | 100.530499 |
| 100.475369 | 100.592979 | 99.4785648 | 100.507213 |
| 100.451436 | 100.393563 | 100.288305 | 99.8227109 |
| 100.725489 | 100.215714 | 99.240882  | 100.187197 |
| 100.521045 | 100.338128 | 100.196044 | 100.026299 |
| 99.913274  | 100.113045 | 99.8508833 | 99.5636575 |

99.9018129 99.8747481 99.5184355 99.9852256  
100.521888 100.278743 101.120965 99.8485839  
99.9166448 100.063988 99.8741893 99.997677  
100.009513 100.243811 99.5299922 99.7832545  
99.4560131 100.045611 99.983978 99.5799898  
99.9914785 99.9923016 99.3368026 100.003337  
100.365141 100.473147 100.081054 100.157604  
99.8023718 100.135522 99.4760609 99.8773676  
100.494415 100.579613 99.2724703 100.071253  
100.523067 100.497599 100.352444 99.9611314  
100.101538 100.224219 99.4427391 100.163911  
100.650319 100.616216 99.3450849 100.294408  
99.7941131 100.068241 100.66775 99.5584829  
99.8859698 99.8001761 100.611892 99.6731326  
100.089403 100.098768 100.682581 100.364588  
99.7135489 99.9181852 100.044265 99.8692822  
99.9727701 99.8820382 99.6694431 99.7586752  
99.4453948 99.5043179 100.58146 99.5594531  
99.6087143 99.3911689 99.9053924 99.9412415  
100.15918 99.8542446 99.5351927 100.170379  
99.8989477 99.7369949 99.5143906 99.6289868  
100.356546 99.9520539 98.5831129 100.231019  
100.130696 100.138712 100.062178 100.319796  
100.405592 100.233787 99.6087704 100.15906  
100.029064 99.9637485 100.296972 99.860065  
99.9945123 99.7647885 100.008247 100.005601  
100.385704 100.163316 99.438309 100.174422  
100.417053 100.293779 99.9462261 99.6920522  
100.442335 100.137345 99.9957273 99.8094509  
100.120584 100.042877 100.709739 99.9279816  
99.6877616 99.5514001 100.313729 99.6605195  
100.079796 99.8237171 99.8038861 100.128659  
99.6618057 99.855004 100.441623 100.122352  
99.5938824 99.752942 100.546212 99.8817336  
99.7430441 99.8258434 100.349555 99.9538546  
99.763438 99.81263 100.898306 99.8159192  
99.6739409 99.8665467 101.171622 99.5579978  
99.4440464 99.5292259 100.622293 99.6889798  
99.9176561 99.897226 100.237648 100.022741  
100.024513 100.122157 100.165996 100.244279  
100.002265 100.040143 100.593594 100.252364  
99.8455191 100.015691 100.42217 100.266109  
100.117044 100.231357 100.355526 100.067534  
99.5426449 99.8436131 100.698568 99.8383964  
99.5665782 99.6369073 100.75481 99.869444  
99.9891189 99.9251716 100.314115 99.9967068

|            |            |            |            |
|------------|------------|------------|------------|
| 99.790068  | 99.8666986 | 100.744794 | 100.2501   |
| 99.8556318 | 99.8932772 | 100.325286 | 100.301846 |
| 100.232666 | 100.183668 | 99.6301503 | 100.373482 |
| 99.8200689 | 99.9402075 | 100.313537 | 100.001558 |
| 99.6958517 | 99.7192251 | 100.360919 | 100.015303 |
| 100.119572 | 100.027234 | 99.4885807 | 100.437033 |
| 100.233171 | 100.098616 | 99.9558567 | 100.1382   |
| 100.086538 | 100.013413 | 99.9312024 | 99.7014312 |
| 100.244127 | 100.010375 | 99.5648549 | 100.152268 |
| 100.284072 | 100.24533  | 99.7148994 | 100.088394 |
| 100.491718 | 100.415282 | 99.1561328 | 100.087424 |
| 100.070189 | 100.130662 | 99.4001719 | 99.9609697 |
| 99.9326566 | 99.9771138 | 99.3152301 | 99.8556989 |
| 100.641554 | 100.506104 | 99.3427736 | 100.261258 |
| 99.9321509 | 100.208576 | 99.8622474 | 100.022256 |
| 99.5542744 | 99.8756594 | 100.102049 | 99.673456  |
| 99.7802924 | 99.9210709 | 100.351289 | 99.6116842 |
| 99.383539  | 99.7061636 | 100.667172 | 99.6498469 |
| 99.2908396 | 99.5144937 | 100.971498 | 99.5895305 |
| 99.3392118 | 99.292752  | 100.283874 | 99.596969  |
| 99.773045  | 99.5422874 | 99.8075457 | 100.132217 |
| 99.7187737 | 99.7699524 | 100.196236 | 100.152106 |
| 99.6784916 | 99.7456519 | 99.9677986 | 100.071415 |
| 99.8178778 | 99.8102    | 99.7019944 | 100.020801 |
| 99.5625331 | 99.7588653 | 100.423325 | 99.7184103 |
| 99.8982735 | 99.8680655 | 99.8799677 | 100.186065 |
| 100.343736 | 100.376249 | 99.2343332 | 100.213878 |
| 100.31778  | 100.31565  | 99.477987  | 99.7463855 |
| 100.457335 | 100.206146 | 99.2634175 | 100.065108 |
| 100.188844 | 100.066874 | 99.5534908 | 100.255275 |
| 100.508236 | 100.366832 | 99.4670081 | 100.069313 |
| 100.258958 | 100.228016 | 100.515586 | 99.6451574 |
| 99.2033467 | 99.3402685 | 99.6698479 | 99.7757392 |
| 99.9935345 | 100.013383 | 98.9454589 | 100.244792 |
| 99.8157213 | 99.9390126 | 100.408682 | 99.4375169 |
| 99.4451794 | 99.336943  | 100.258065 | 99.2277028 |
| 99.6871796 | 99.5266486 | 101.191816 | 99.2884342 |
| 99.1411708 | 99.1333307 | 99.8329847 | 99.5820771 |
| 99.7404733 | 99.6970057 | 98.7397563 | 99.9915296 |
| 99.7019276 | 100.044673 | 99.3194986 | 99.581431  |
| 99.6067364 | 99.7518767 | 99.4273577 | 99.7476348 |
| 99.8088501 | 100.024569 | 99.4331358 | 100.12866  |
| 99.9804625 | 100.163787 | 99.1030101 | 100.052261 |
| 100.007612 | 100.248588 | 98.5527364 | 99.83534   |
| 99.7992975 | 100.234832 | 99.5192305 | 99.5916067 |
| 100.115875 | 100.468979 | 99.9448885 | 99.8136964 |

99.010618 99.635786 99.8849882 99.9984749  
99.3333967 99.6085772 99.9310209 99.8902567  
100.093921 99.9514077 99.4496999 100.149334  
98.9755916 99.2740605 100.654062 99.6491078  
99.1766999 99.3443499 101.167355 99.6812502  
98.6700747 98.9806593 101.038695 99.3603105  
98.9090583 99.0819364 100.589539 99.5875687  
99.6437738 99.6691923 100.594739 99.5754548  
99.0974297 99.4179647 100.593391 99.7910836  
99.7004193 99.9063621 100.784841 100.522283  
99.2514451 99.1062731 100.752868 99.3535267  
99.8820871 99.6460649 100.3405 100.19569  
100.359216 100.270355 100.342041 100.041601  
99.633048 99.8174801 100.088187 100.48045  
100.551107 100.390678 100.874402 100.218142  
100.713837 100.239367 101.316432 99.3620872  
99.8504125 100.00386 101.356494 99.9847457  
100.258327 100.535338 100.975135 100.42521  
100.05504 100.373295 100.465501 100.453476  
100.192129 100.447514 100.048895 100.596905  
100.122747 100.379795 99.9310209 100.539081  
100.239054 100.568291 99.8308661 100.449599  
100.355027 100.346842 99.822584 100.525514  
100.432286 100.438596 100.21184 100.58043  
100.455078 100.387957 100.340693 100.471082  
100.342457 100.245262 100.392696 100.702216  
100.464128 100.150939 101.061422 100.532298  
99.7357808 99.5138 100.861113 100.07019  
100.422901 100.093347 100.525786 100.512754  
100.167326 99.7680508 100.136338 100.053715  
100.042638 99.5608107 99.8566752 100.3094  
99.7573999 99.5130442 99.8967371 99.9879761  
99.7367864 99.5337531 99.595117 99.9706935  
100.433962 100.086393 99.7563278 100.081658  
100.478038 100.058278 99.7584464 99.950019  
100.258997 99.9683376 99.5565959 100.123814  
100.237211 99.9356871 99.1213076 100.075035  
100.391059 99.9520123 99.3204617 100.053876  
100.491948 100.138241 99.6051325 99.929183  
100.371618 100.070673 99.9109899 99.7967368  
100.674454 100.211251 100.076631 99.9057626  
100.711156 100.472909 100.153865 99.9265986  
100.19481 100.056313 99.9728163 99.9311212  
100.061409 99.6977615 100.379599 99.2008905  
99.7015924 99.5589968 99.8221988 99.4352556  
100.636913 100.160613 99.1363309 99.8379243

|            |            |            |            |
|------------|------------|------------|------------|
| 100.116378 | 100.192961 | 99.4849467 | 100.111216 |
| 100.441168 | 100.494827 | 98.8612903 | 101.000382 |
| 100.405806 | 100.273529 | 99.467227  | 100.055976 |
| 99.5207626 | 100.005523 | 99.7243553 | 99.6986943 |
| 100.261511 | 100.643266 | 99.3574419 | 100.049031 |
| 100.104144 | 100.649464 | 99.5829829 | 100.360925 |
| 100.286817 | 100.276855 | 100.10321  | 100.639547 |
| 99.8666688 | 99.6156817 | 99.792345  | 99.7542571 |
| 100.137159 | 100.07687  | 99.5552477 | 100.148042 |
| 99.7124858 | 99.845747  | 100.085298 | 99.9682707 |
| 99.8861092 | 99.9275244 | 100.957993 | 99.8503613 |
| 99.3362458 | 99.2488168 | 101.090506 | 99.1876459 |
| 99.6655605 | 99.7393305 | 100.117078 | 99.5307138 |
| 100.436811 | 100.415771 | 100.603406 | 100.024803 |
| 99.6596949 | 100.219112 | 100.324706 | 100.85566  |
| 100.697078 | 100.748171 | 100.394622 | 100.456222 |
| 99.6464552 | 99.7914806 | 99.6295934 | 99.3943912 |
| 99.6888556 | 99.870386  | 99.8641868 | 99.1813466 |
| 99.8314748 | 99.896839  | 100.076631 | 99.5124621 |
| 100.304247 | 100.134009 | 99.7482383 | 99.5245761 |
| 100.480552 | 100.298168 | 99.5535142 | 99.9482423 |
| 100.586971 | 100.322807 | 99.4924583 | 99.9978288 |
| 100.11068  | 100.387806 | 99.5955022 | 100.133344 |
| 99.8341563 | 100.125846 | 99.6607955 | 100.172593 |
| 100.066436 | 99.8718976 | 99.6191927 | 100.261106 |
| 99.8869472 | 99.8765836 | 99.1952681 | 100.384346 |
| 100.496138 | 100.39748  | 98.871691  | 100.27322  |
| 99.8148834 | 99.514707  | 101.003641 | 98.8332716 |
| 100.020684 | 99.8256427 | 100.501711 | 99.3494887 |
| 100.077162 | 99.8362239 | 99.9656899 | 99.540728  |
| 99.7087988 | 99.5015561 | 100.33164  | 99.7251835 |
| 100.74702  | 100.793368 | 100.963386 | 100.00962  |
| 99.6402544 | 99.4622545 | 100.115152 | 99.7545801 |
| 99.7062849 | 99.5073001 | 99.5477361 | 99.5851459 |
| 100.470831 | 100.551814 | 98.7663358 | 100.798805 |
| 99.8554402 | 100.107102 | 99.1604065 | 100.556041 |
| 99.5041711 | 100.080498 | 99.6997018 | 100.34865  |
| 99.4600949 | 99.9037923 | 100.362072 | 99.880727  |
| 100.102803 | 100.241635 | 100.533491 | 100.093933 |
| 99.6590245 | 99.4646731 | 100.219929 | 99.4018211 |
| 100.729591 | 100.659894 | 99.6973905 | 100.634863 |
| 100.452429 | 100.426879 | 100.866638 | 100.031459 |
| 99.6152351 | 99.9242675 | 99.6796351 | 99.7888967 |
| 99.7541779 | 100.108609 | 99.3495491 | 100.570109 |
| 100.03779  | 100.179521 | 99.6805958 | 100.444139 |
| 100.785049 | 100.689421 | 99.4406206 | 100.538091 |

|            |            |            |            |
|------------|------------|------------|------------|
| 99.8134601 | 100.108609 | 98.7205028 | 100.272728 |
| 99.653297  | 99.9317079 | 99.1447344 | 100.040353 |
| 100.201153 | 100.263644 | 99.6590768 | 100.118135 |
| 100.149954 | 100.478506 | 99.9194182 | 100.470012 |
| 100.120313 | 100.113164 | 100.875669 | 99.8008631 |
| 99.8338384 | 99.8888873 | 100.151708 | 99.6409336 |
| 100.442155 | 100.129412 | 99.3727973 | 100.421338 |
| 100.006464 | 100.047567 | 100.210885 | 100.619754 |
| 100.193574 | 100.114835 | 99.6160388 | 100.574314 |
| 100.388767 | 100.099802 | 99.2544429 | 100.045043 |
| 100.117619 | 100.086287 | 99.8986678 | 100.137863 |
| 99.9433085 | 100.090843 | 99.4235207 | 100.517231 |
| 100.421272 | 100.397876 | 100.111136 | 100.63738  |
| 99.8104287 | 100.084313 | 99.5282336 | 100.231816 |
| 100.262961 | 100.247396 | 99.1107267 | 100.00122  |
| 100.099093 | 100.057285 | 100.581127 | 99.7977907 |
| 99.9845703 | 99.6605105 | 100.036043 | 99.9247317 |
| 100.216142 | 99.9690621 | 99.3843254 | 100.077384 |
| 100.145744 | 99.8648956 | 99.6427454 | 99.5456874 |
| 100.295465 | 99.7693843 | 99.9753292 | 99.8996669 |
| 100.584635 | 100.377832 | 99.7718594 | 100.35245  |
| 100.728967 | 100.505231 | 99.5320763 | 99.9239231 |
| 99.9889491 | 100.017197 | 100.342497 | 99.5950085 |
| 100.192395 | 100.081884 | 99.6477409 | 99.9176165 |
| 100.581435 | 100.50265  | 99.221588  | 100.196563 |
| 99.8272702 | 100.36781  | 99.4940338 | 99.7840454 |
| 100.77225  | 100.60378  | 101.209789 | 99.1021216 |
| 99.440083  | 99.5930907 | 100.241435 | 99.4745358 |
| 99.8961521 | 99.8820542 | 100.530596 | 99.8383794 |
| 99.0572746 | 99.013949  | 100.821295 | 99.7036764 |
| 99.5212593 | 99.2306337 | 100.416276 | 100.093232 |
| 99.4153259 | 99.529619  | 100.134416 | 100.263996 |
| 99.5170489 | 99.5873206 | 100.862796 | 99.8482436 |
| 99.3678328 | 99.2221303 | 100.636654 | 99.8170339 |
| 99.6575074 | 99.4983387 | 100.076584 | 99.8076549 |
| 99.7691669 | 99.6785802 | 99.9630326 | 100.317683 |
| 100.065241 | 100.084465 | 100.008953 | 100.217262 |
| 100.094209 | 100.241778 | 99.9086587 | 100.066712 |
| 99.9296668 | 99.8946575 | 100.201663 | 100.057979 |
| 100.269192 | 100.173144 | 99.663688  | 100.352612 |
| 100.32578  | 100.469244 | 99.6000917 | 100.408563 |
| 100.194248 | 100.352322 | 100.162083 | 99.9425196 |
| 99.999054  | 100.129108 | 100.728494 | 99.4945876 |
| 99.6915273 | 100.002924 | 101.501833 | 99.537602  |
| 99.5172173 | 99.5974943 | 99.7935705 | 99.2093342 |
| 100.648633 | 100.304491 | 99.8337265 | 100.285179 |



99.7855032 99.9663289 99.9188418 100.210955  
100.024653 99.7456962 99.7082631 99.7559082  
100.026506 99.6677991 100.119814 99.426185  
100.410493 99.992902 100.158433 100.195431  
101.960252 101.23789 100.907371 99.3708807  
100.114082 100.193035 100.667395 100.68088  
100.049915 99.8569996 100.373238 100.256881  
100.073662 99.8589736 100.770956 99.8616654  
99.9219197 99.9739212 101.327375 99.3378923  
99.6718227 99.5249118 100.562682 99.6658367  
100.257067 100.343211 100.291197 100.594366  
99.8523641 100.119542 99.9778269 99.9797125  
100.121492 100.372062 99.0940111 100.230522  
100.117787 100.509331 101.352737 99.9328171  
99.2906985 99.6749359 100.029895 99.8052292  
100.073999 100.11696 99.0158126 100.640453  
100.27374 100.472281 99.6763689 100.508984  
100.37782 100.436141 99.827194 99.9860191  
100.157196 100.302668 99.8227749 100.38269  
100.527205 100.507965 99.7090316 100.323019  
100.146249 100.20412 100.106941 99.8320728  
100.187848 100.072014 99.9272957 99.7413545  
101.056703 100.638097 99.4121848 100.326577  
100.828332 100.459829 101.811745 100.294559  
99.5850887 99.3284227 100.611292 99.7974672  
100.087641 99.8691473 99.9173048 100.041  
99.7125793 99.9739212 100.078889 99.8852748  
99.9456663 99.8178232 100.286394 99.8443626  
99.4030316 99.7956537 99.6667622 100.354391  
99.9887807 100.076114 99.063846 100.308627  
99.7102214 99.9976092 99.1624107 100.237314  
99.5748154 99.936567 99.2801888 99.905165  
99.3930951 99.8422705 99.4571441 100.116679  
100.066589 100.275032 98.7614273 100.342748  
99.9473505 100.15477 99.2056409 100.464352  
100.261614 100.166159 99.2997865 100.110211  
99.3654749 99.7513146 99.906161 99.6486956  
99.1120096 99.3149083 101.068187 99.1092367  
99.6637388 99.4963647 100.543853 99.567518  
99.3718747 99.4363854 101.138508 99.6220137  
99.4451355 99.2786171 100.270639 99.7120853  
99.6192771 99.4875576 99.5040248 99.835307  
99.5505636 99.4426111 100.464694 99.6097239  
100.204858 100.09555 99.7076867 100.171822  
99.8491642 100.074595 99.9338283 100.053451  
99.7972923 99.8781062 99.7964525 99.7358564

99.8075656 100.009453 99.7234417 99.8524481  
99.9283195 100.004139 99.3253403 100.113607  
99.9625078 100.012186 99.0544315 100.109726  
100.452345 100.120645 100.237022 100.168691  
100.375948 99.9844381 99.9073322 100.136001  
100.215935 99.9627798 100.048208 99.9320742  
99.9126321 99.6881202 100.043685 99.938128  
100.443192 99.9663093 99.6239979 100.182528  
100.16911 100.041873 99.5903053 100.220927  
100.004169 99.6563546 99.7981139 99.8142846  
99.8994297 99.4603067 100.161044 99.8533749  
100.138481 99.6067811 100.09479 99.9002485  
100.32349 99.7378541 99.2612938 100.262611  
100.130031 99.6712748 99.8428866 99.9758345  
100.086904 99.4375254 99.7271108 100.16748  
99.9464302 99.3194474 99.8722828 100.206571  
99.9379806 99.2923344 99.9435121 100.017865  
100.10345 99.455975 99.8288669 99.9440088  
100.304655 99.8658788 99.3494825 100.347365  
100.017899 99.7559829 100.270036 100.02634  
100.227729 99.6606863 99.8413037 100.298588  
100.015787 99.6016473 99.4184505 100.127698  
100.331412 99.5493465 99.5301561 99.5904672  
99.9654416 99.473783 100.345788 99.7291856  
100.626089 99.995187 99.3763913 100.115764  
99.6976973 99.3627641 99.9279095 99.9555975  
99.9643854 99.8090859 100.01655 99.8154954  
100.167878 99.5849624 99.9417031 99.872574  
99.735016 99.2241508 99.8297714 99.9274041  
100.190234 100.033049 100.035997 99.9547327  
100.124926 99.6751252 100.033284 99.9837909  
100.239347 99.7959305 99.8433389 99.94816  
99.9339319 99.7866254 99.6389221 99.9860395  
100.471181 100.623599 100.388978 100.032913  
99.7652935 100.358566 100.413399 99.4500191  
99.9223138 100.500869 100.811379 99.8639258  
100.600916 100.71681 100.454328 100.15987  
100.19129 100.749538 100.743089 100.09103  
100.328067 100.91719 100.447544 100.073733  
99.5651454 100.067702 100.359808 99.5333885  
100.551979 101.009117 100.043911 100.141708  
100.336693 100.71312 100.054313 99.9097616  
100.050817 100.408139 99.4614142 100.279562  
99.9411492 100.49381 100.493674 99.8512993  
100.063139 100.56809 100.568973 100.069063  
99.8691522 100.067542 100.475131 100.027551

99.8772497 100.07043 99.5183976 100.205706  
100.015787 100.249151 99.7411305 99.862888  
99.7156525 100.030161 100.055218 99.5894294  
100.357816 100.488836 100.131648 100.248082  
99.4790659 99.8121341 100.3632 100.088089  
99.85683 100.319741 99.5805819 100.183047  
99.541029 99.9343833 100.283378 99.6743555  
100.269448 100.581085 100.057027 100.049691  
100.100986 100.2007 100.067202 100.042426  
99.8636952 100.033851 99.4957852 100.041907  
100.237411 100.481617 99.8926341 99.958019  
100.37542 100.547715 100.060419 100.269876  
99.8802422 100.029519 99.8268318 99.9888069  
100.239699 100.281879 99.305162 100.133925  
99.7878256 100.152731 100.243806 99.7504604  
99.9054148 100.296799 99.7834158 99.6688206  
100.334052 100.480975 99.863464 100.291151  
99.7123079 99.6723978 99.8465046 100.062317  
100.093593 100.298243 99.9934857 100.272816  
99.3806641 99.660205 100.240866 99.5304481  
99.9615689 100.216102 100.251946 100.184604  
100.152387 100.373807 99.6988452 100.051593  
99.7733909 100.143426 99.7752753 100.160908  
99.5781717 99.6704726 99.7341206 99.5880457  
99.8519011 99.8501565 100.291292 99.7615301  
100.072293 100.471831 100.004566 100.434366  
99.6258763 99.7765182 99.7990184 100.134617  
99.906471 99.8560925 100.137301 99.8179169  
99.8453879 99.9866841 100.489377 99.8621961  
100.317153 100.376053 100.284282 100.037237  
99.6005278 100.00369 100.033962 99.9540408  
100.108731 100.098024 100.235891 100.048653  
99.6466481 99.9939036 100.488247 99.9647647  
100.388798 100.610444 100.230691 100.242893  
100.13232 100.106046 100.088006 99.6392435  
100.095001 100.049734 99.9267789 100.208819  
99.7630051 99.9281265 100.387169 99.9234259  
100.122638 100.302093 100.00547 100.086532  
99.7615968 99.4765103 99.9699687 99.661902  
100.017371 100.004332 99.2902378 100.310004  
99.8158146 100.004332 100.359582 99.8049445  
100.121758 100.152892 100.006601 100.179415  
99.6980494 99.4920723 99.9355978 99.928269  
100.238467 99.7752348 99.636887 100.450106  
100.114364 100.118399 100.364782 100.015617  
100.090248 99.9441697 100.186596 100.033778

|            |            |            |            |
|------------|------------|------------|------------|
| 100.299902 | 99.9631006 | 100.137979 | 100.030492 |
| 99.8195113 | 99.6443222 | 99.2034059 | 100.051593 |
| 99.5394447 | 99.5960322 | 99.8119075 | 99.6525618 |
| 100.304479 | 100.233429 | 99.863464  | 100.42001  |
| 99.7976833 | 99.7129871 | 99.9118547 | 100.042772 |
| 99.7996197 | 99.7532556 | 100.109714 | 100.186507 |
| 99.7774397 | 99.7636836 | 100.283378 | 99.6179687 |
| 100.357816 | 100.372523 | 100.109714 | 100.357915 |
| 99.507407  | 99.5602559 | 100.185918 | 99.9863854 |
| 99.7454019 | 99.529132  | 99.7372864 | 100.26313  |
| 99.4693002 | 99.8173567 | 99.9844154 | 99.6237178 |
| 100.584068 | 100.695484 | 99.8971779 | 99.9161878 |
| 100.130204 | 100.369769 | 99.7751357 | 99.6361633 |
| 99.9787979 | 100.081085 | 99.1513645 | 100.006245 |
| 99.6552123 | 100.216008 | 100.059675 | 99.9339918 |
| 100.261891 | 100.481185 | 100.006564 | 99.9642414 |
| 99.6604939 | 99.903495  | 99.4853985 | 100.05378  |
| 99.8483426 | 100.055485 | 100.339016 | 99.8135122 |
| 99.6157764 | 100.012818 | 99.8099403 | 99.9415974 |
| 100.056613 | 100.00026  | 100.150754 | 100.018518 |
| 100.046226 | 100.032944 | 99.2487723 | 99.8484288 |
| 99.4710608 | 99.6156161 | 100.209063 | 99.579467  |
| 99.9581997 | 100.31873  | 99.7401051 | 100.307012 |
| 100.092352 | 100.335796 | 99.8603392 | 99.7454075 |
| 100.022811 | 100.375887 | 99.0141801 | 99.9381404 |
| 99.753626  | 100.353507 | 100.035944 | 99.540229  |
| 100.374389 | 100.592279 | 99.8011262 | 99.9037423 |
| 100.406607 | 100.512259 | 100.085665 | 99.9609572 |
| 100.048515 | 100.128099 | 99.6273291 | 100.028025 |
| 99.7143661 | 99.7373367 | 99.9193263 | 99.8807526 |
| 100.407311 | 100.391988 | 99.2923911 | 100.170976 |
| 99.7965829 | 99.9426195 | 99.8732215 | 100.197249 |
| 100.011896 | 100.311485 | 99.8164944 | 99.8007209 |
| 100.083902 | 100.1091   | 99.8201105 | 99.8250934 |
| 99.999044  | 99.8350674 | 99.8115223 | 100.213671 |
| 99.6830287 | 99.6983732 | 100.338112 | 99.9953552 |
| 99.7374291 | 99.5673142 | 101.282583 | 100.187397 |
| 99.7506331 | 99.5562048 | 100.209063 | 99.8710728 |
| 100.099922 | 100.112481 | 100.537899 | 99.8997666 |
| 100.481253 | 100.50759  | 100.088829 | 100.054644 |
| 100.498155 | 100.559917 | 100.185785 | 100.125342 |
| 100.256434 | 100.601296 | 100.375176 | 99.8415146 |
| 99.6020443 | 99.7086776 | 100.4649   | 99.793461  |
| 99.7824987 | 99.6454022 | 99.566986  | 100.07193  |
| 99.8479904 | 99.7294474 | 100.406365 | 99.8902596 |
| 100.406959 | 99.9327981 | 100.193243 | 100.216782 |

|            |            |            |            |
|------------|------------|------------|------------|
| 100.110838 | 99.8413466 | 100.752151 | 99.8428975 |
| 100.037424 | 99.5718224 | 99.8983079 | 99.9946638 |
| 99.8999261 | 99.5335029 | 99.9175182 | 99.9438446 |
| 100.162421 | 99.8920636 | 99.4881106 | 100.189471 |
| 100.245166 | 99.981905  | 99.6293631 | 100.03079  |
| 100.01084  | 99.8574473 | 100.229404 | 99.6633015 |
| 100.07105  | 99.9479327 | 100.140584 | 99.8740113 |
| 100.064008 | 99.9804559 | 99.8820356 | 99.8947538 |
| 100.262772 | 100.009115 | 99.8180765 | 99.7955353 |
| 100.035839 | 100.041638 | 100.379019 | 99.8605286 |
| 100.496394 | 100.643318 | 99.6700438 | 100.182902 |
| 100.156788 | 100.183002 | 100.206125 | 100.248069 |
| 100.262419 | 100.141462 | 100.153466 | 99.7295048 |
| 99.7291546 | 99.9583981 | 100.47055  | 99.6980453 |
| 100.172632 | 99.8331353 | 100.040916 | 99.7317519 |
| 99.9861921 | 99.8687177 | 99.7299349 | 100.184977 |
| 99.8483426 | 100.159656 | 100.484562 | 99.7320977 |
| 100.050628 | 100.288139 | 99.7999961 | 100.321705 |
| 99.6023964 | 99.7544033 | 100.420377 | 100.156456 |
| 99.8479904 | 100.026665 | 100.256976 | 100.068991 |
| 99.9351367 | 100.165935 | 99.9294965 | 100.164407 |
| 99.9545026 | 100.125683 | 99.9950376 | 99.8878397 |
| 99.9953469 | 99.9261969 | 99.4476558 | 100.028543 |
| 99.6358465 | 99.8634045 | 100.13629  | 99.7329619 |
| 100.448155 | 100.32356  | 99.8054202 | 100.193619 |
| 100.004326 | 100.164647 | 99.8519771 | 100.379265 |
| 100.01084  | 100.230981 | 100.106232 | 99.6551774 |
| 99.7717595 | 99.8394146 | 100.664688 | 100.021456 |
| 99.6501068 | 99.6346148 | 100.23189  | 100.068646 |
| 99.5816221 | 99.429493  | 99.9970717 | 99.9680442 |
| 99.4724692 | 99.6460462 | 100.33088  | 99.6164579 |
| 100.394635 | 100.743786 | 100.035718 | 100.607952 |
| 99.6525715 | 99.8120435 | 100.03617  | 100.116699 |
| 99.7076761 | 99.8988258 | 100.316189 | 100.068818 |
| 99.3152538 | 99.4879382 | 100.473036 | 99.7794598 |
| 100.502556 | 100.240159 | 99.9530009 | 100.188088 |
| 99.8030969 | 99.7392688 | 100.075947 | 100.338644 |
| 99.7442952 | 99.8097894 | 99.8935618 | 99.9953552 |
| 100.121577 | 99.8321693 | 99.9154842 | 100.072967 |
| 99.9550307 | 99.928451  | 99.6869941 | 100.047557 |
| 100.168231 | 99.9345692 | 99.9306265 | 100.004689 |
| 100.393755 | 100.348838 | 99.9771833 | 100.203818 |
| 100.164006 | 99.9218497 | 99.8135564 | 99.8354647 |
| 99.9043274 | 99.8181618 | 99.7161486 | 99.9943181 |
| 99.9300312 | 99.8880384 | 100.181039 | 100.000714 |
| 100.350622 | 100.251751 | 100.099452 | 100.139862 |

|            |            |            |            |
|------------|------------|------------|------------|
| 100.129675 | 100.267208 | 99.7966061 | 100.321878 |
| 100.005382 | 99.9909213 | 100.024418 | 99.9901696 |
| 99.9883048 | 99.9393994 | 100.040464 | 100.03926  |
| 99.9066161 | 99.8569642 | 99.846101  | 100.259996 |
| 99.8856658 | 99.9691855 | 100.286809 | 99.9236206 |
| 100.370868 | 100.124717 | 99.9536789 | 100.235969 |
| 100.139006 | 100.065467 | 99.6081187 | 100.297159 |
| 100.250272 | 100.227922 | 100.566376 | 100.070374 |
| 100.272807 | 100.283147 | 100.159569 | 100.04168  |
| 100.348509 | 100.329517 | 99.9385366 | 99.9438446 |
| 99.6268677 | 99.4926074 | 99.3642603 | 100.043582 |
| 99.6240509 | 99.4608892 | 99.9907436 | 99.5537117 |
| 100.228265 | 100.085271 | 99.7446251 | 100.380475 |
| 99.7092606 | 99.6611808 | 99.9111901 | 100.261551 |
| 99.8782716 | 99.8065693 | 99.7674516 | 99.5884555 |
| 99.6691205 | 99.6645619 | 99.8698314 | 99.8952724 |
| 100.433367 | 100.028758 | 99.4743243 | 100.044273 |
| 100.058726 | 99.9451956 | 99.5843883 | 100.192582 |
| 100.172409 | 99.5687486 | 100.1421   | 100.130431 |
| 100.118713 | 99.2568264 | 99.928529  | 100.106072 |
| 99.9419566 | 99.3140495 | 99.7210603 | 100.168783 |
| 99.6926668 | 99.3406575 | 99.931693  | 99.7982167 |
| 100.449691 | 99.6559458 | 99.8797128 | 100.210072 |
| 100.019596 | 99.3342459 | 99.8573388 | 100.111427 |
| 100.008856 | 99.6410389 | 100.282898 | 99.9517987 |
| 100.262019 | 99.7181378 | 100.331489 | 100.139932 |
| 100.20445  | 99.5870215 | 99.933049  | 99.900835  |
| 100.087904 | 99.419199  | 99.8925949 | 99.7346417 |
| 99.6990047 | 99.290487  | 99.931241  | 99.7220304 |
| 100.598455 | 99.8216845 | 100.248546 | 100.015892 |
| 100.070651 | 99.6787068 | 99.9951993 | 100.158417 |
| 100.21202  | 99.6929725 | 100.522911 | 99.9201839 |
| 100.255857 | 99.64168   | 99.9940693 | 100.048716 |
| 100.156388 | 99.7481119 | 99.9479651 | 100.122829 |
| 99.9354426 | 99.560093  | 100.556359 | 100.209899 |
| 99.7579821 | 100.004574 | 100.656252 | 100.122484 |
| 100.390361 | 100.435591 | 100.522911 | 100.542113 |
| 99.693371  | 99.6386345 | 100.014861 | 99.7818047 |
| 100.199169 | 100.194837 | 100.030003 | 100.44105  |
| 99.8173117 | 100.010825 | 100.477259 | 99.8916788 |
| 100.066601 | 100.598284 | 100.510255 | 99.8695658 |
| 100.449163 | 100.499867 | 100.212612 | 100.140623 |
| 99.9317455 | 100.027495 | 99.8338347 | 99.9027354 |
| 100.2923   | 100.688206 | 100.349795 | 100.085859 |
| 99.5762964 | 99.9048744 | 100.491045 | 99.7405155 |
| 100.204274 | 100.13569  | 100.144812 | 100.076876 |

|            |            |            |            |
|------------|------------|------------|------------|
| 99.8664302 | 99.6923313 | 100.06865  | 100.10849  |
| 100.395819 | 100.347913 | 100.070232 | 100.135959 |
| 99.6990047 | 99.8420412 | 100.011697 | 99.9336591 |
| 100.306032 | 99.9691503 | 100.16809  | 100.087414 |
| 100.565005 | 100.328037 | 100.123568 | 100.001207 |
| 99.8317479 | 99.8636802 | 99.9425411 | 100.259654 |
| 100.031567 | 100.043364 | 100.059836 | 100.204717 |
| 99.4715454 | 99.6480916 | 100.290356 | 99.83726   |
| 100.315187 | 100.454024 | 99.7380103 | 100.314591 |
| 99.7997065 | 99.7875429 | 99.9757632 | 100.129221 |
| 99.8063964 | 99.9649828 | 100.063226 | 100.119892 |
| 99.4248916 | 99.4987023 | 100.504379 | 99.7569275 |
| 100.346348 | 100.284759 | 99.8024206 | 100.322883 |
| 99.5428465 | 99.6657234 | 99.9540671 | 100.318219 |
| 100.021004 | 100.02461  | 99.923783  | 99.9395328 |
| 99.5701345 | 99.6695703 | 100.097804 | 99.8279311 |
| 100.447402 | 100.373078 | 99.934405  | 100.220956 |
| 100.05639  | 100.127355 | 99.8790348 | 100.258099 |
| 99.7616792 | 99.9611358 | 99.9531631 | 99.9647555 |
| 99.842135  | 99.9133697 | 99.8358687 | 99.9511076 |
| 100.398636 | 100.214873 | 99.7945105 | 100.080158 |
| 100.086143 | 100.120142 | 99.9662712 | 100.427747 |
| 99.6711884 | 99.6078591 | 100.199504 | 99.7595189 |
| 99.493904  | 99.4987023 | 100.420081 | 99.5475447 |
| 100.470113 | 100.32964  | 100.052829 | 100.504106 |
| 100.033856 | 99.9973611 | 99.7875045 | 100.258617 |
| 100.225929 | 100.493455 | 99.8729328 | 99.8343231 |
| 99.4520036 | 99.8622376 | 100.397255 | 99.8217118 |
| 100.229802 | 100.227376 | 99.9703392 | 99.9469614 |
| 99.9824485 | 100.241321 | 99.5703177 | 100.080158 |
| 100.147761 | 100.116937 | 100.21442  | 100.032995 |
| 99.9072743 | 99.9322838 | 100.182102 | 99.9797855 |
| 99.9384355 | 99.8944557 | 100.1534   | 100.030058 |
| 100.116424 | 99.9045539 | 99.8532707 | 100.068583 |
| 100.18931  | 100.470694 | 100.222104 | 99.9977523 |
| 100.437895 | 100.225613 | 100.649472 | 100.275893 |
| 100.2923   | 100.073178 | 100.149106 | 99.9241574 |
| 99.7671368 | 99.659953  | 99.5219535 | 99.9839317 |
| 100.048644 | 99.9282766 | 100.019607 | 99.8148015 |
| 99.7419614 | 100.121745 | 100.297588 | 99.8562634 |
| 100.370115 | 100.696061 | 100.240862 | 100.259308 |
| 100.142304 | 100.345829 | 99.8919169 | 99.4998634 |
| 99.9379074 | 100.051539 | 99.4643233 | 100.01641  |
| 99.8287551 | 100.171755 | 100.015539 | 99.7541634 |
| 100.585779 | 100.748956 | 100.355897 | 99.9932606 |
| 100.129628 | 100.394397 | 100.220748 | 99.8897785 |

99.8468884 100.149636 99.5705437 100.031613  
99.6842163 99.8734578 99.9506771 99.6909339  
100.147585 100.372437 99.6941662 100.23685  
100.326454 100.383818 99.8713508 99.8106553  
99.6972441 100.038555 99.1777542 99.8381238  
99.4988334 99.6496945 100.165604 99.8134194  
100.350926 100.432706 100.05961 100.137686  
100.037729 100.234108 99.8677348 100.103308  
100.164839 100.381413 100.112494 99.9552538  
99.7370319 99.9508774 99.8012906 99.7291135  
100.40515 100.053302 99.6198119 99.9656193  
99.8671344 99.7282361 99.381833 100.205926  
99.9060419 99.7192599 100.036783 99.8020174  
99.5234807 99.8234477 100.159954 99.8020174  
99.6819276 99.8393163 99.6821881 100.067374  
99.6192531 99.7283963 99.2177564 99.8657651  
99.8414308 100.065163 99.4356212 100.017792  
100.364658 100.261197 99.6991382 100.145288  
99.6433722 99.6221248 99.4708773 100.106417  
99.6993568 99.6896064 99.64874 99.5610198  
99.6451327 99.5943948 99.8618588 99.9039447  
99.9762867 99.7255111 99.9432191 100.059254  
99.9002322 99.8253711 99.5282815 100.145806  
99.9396679 99.8454072 100.286514 99.7954526  
99.717138 99.9428629 99.9979113 99.49088  
100.341947 100.376124 99.7601584 99.9652738  
99.8394942 99.9669062 99.2374185 99.9023898  
100.200128 100.760822 99.8920666 99.70457  
100.096496 100.740094 99.8834769 100.199964  
99.685489 100.269792 99.904499 99.9534777  
99.9043646 100.429184 99.7272808 99.888613  
99.8039 100.289556 99.8572559 99.8711427  
100.392788 100.58472 99.9478994 100.291293  
99.9798449 100.460034 99.6228486 100.257564  
100.368155 100.76741 100.072675 100.071272  
100.01521 100.429666 99.7634478 99.9422345  
99.842256 100.203433 99.9727641 100.023705  
99.8012608 99.836446 100.630325 99.9700831  
100.334726 100.253243 100.102965 100.123856  
100.140483 100.107669 99.8798602 100.185434  
100.169514 100.078265 100.644114 100.234558  
100.242883 100.29759 100.291712 99.9880722  
100.122712 100.193631 99.9802236 100.018688  
100.243586 100.265293 100.328105 99.8709697  
100.095793 99.8353213 100.643662 100.201694  
99.8054835 99.8104163 100.396144 100.036851



|            |            |            |            |
|------------|------------|------------|------------|
| 100.49554  | 100.494419 | 100.086238 | 100.053283 |
| 99.9789652 | 100.011745 | 101.056191 | 100.057434 |
| 100.299185 | 100.265936 | 100.643436 | 99.9522669 |
| 99.9756223 | 100.168566 | 99.8753393 | 100.033218 |
| 99.7915838 | 99.913089  | 100.596192 | 99.742451  |
| 100.113387 | 100.361539 | 99.8249316 | 100.235769 |
| 99.9344511 | 100.183669 | 100.395014 | 100.138558 |
| 99.8952154 | 99.8856132 | 100.289451 | 100.297174 |
| 99.7757488 | 99.7895283 | 100.078779 | 100.139077 |
| 100.146993 | 100.166477 | 99.526328  | 99.8176941 |
| 100.030869 | 99.9404041 | 100.355908 | 99.9856506 |
| 100.432023 | 100.381945 | 99.7926074 | 100.188029 |
| 100.280887 | 100.1149   | 100.001246 | 99.90124   |
| 99.9200237 | 99.8656893 | 100.738148 | 99.9337588 |
| 100.19485  | 99.9011989 | 100.385972 | 100.153953 |
| 99.9647137 | 99.7066188 | 99.4388491 | 100.204807 |
| 99.8283563 | 99.8528351 | 100.263456 | 100.091683 |
| 100.183765 | 100.148802 | 99.7923813 | 100.260158 |
| 99.5442052 | 99.5775951 | 99.9924299 | 100.214321 |
| 99.6902395 | 99.7374689 | 99.883929  | 99.856613  |
| 100.047408 | 100.107026 | 99.6538166 | 99.9434453 |
| 99.9837157 | 99.9307635 | 99.4142104 | 100.096353 |
| 99.8589708 | 99.8271267 | 100.556409 | 99.964029  |
| 100.403169 | 100.360254 | 100.070867 | 100.240266 |
| 99.8246615 | 100.071195 | 100.299623 | 100.258083 |
| 100.086468 | 100.081157 | 100.219378 | 99.9216507 |
| 99.4351193 | 99.7312025 | 100.64434  | 99.6767214 |
| 99.9626023 | 100.034561 | 100.009835 | 99.9107535 |
| 99.7863055 | 99.9617742 | 99.8956833 | 99.8396617 |
| 99.8600264 | 100.232033 | 100.40722  | 100.100332 |
| 100.139251 | 100.27638  | 100.214405 | 100.316547 |
| 99.5044417 | 99.7617311 | 99.7654821 | 100.120396 |
| 99.6969254 | 99.733934  | 99.852961  | 99.9117913 |
| 100.230918 | 100.0675   | 100.132351 | 100.174191 |
| 100.212444 | 100.369252 | 99.7932855 | 100.350277 |
| 100.216139 | 100.25035  | 100.319063 | 100.194429 |
| 100.208573 | 100.072481 | 100.333982 | 99.8823859 |
| 99.8489419 | 99.8422304 | 100.093924 | 99.9536507 |
| 99.7935192 | 99.7691223 | 99.7539539 | 100.253066 |
| 99.8406725 | 99.5623307 | 100.02498  | 100.136483 |
| 99.70801   | 99.5719714 | 99.7211776 | 100.050515 |
| 100.273849 | 100.261116 | 99.7659342 | 100.095834 |
| 100.21438  | 100.048379 | 100.535387 | 100.039964 |
| 99.973335  | 100.132253 | 99.6852367 | 99.9619534 |
| 99.7136402 | 100.194917 | 99.9639484 | 99.7768726 |
| 100.234965 | 100.217894 | 99.9343367 | 99.9875533 |

99.813577 99.663236 99.3617682 100.028029  
99.871111 99.7819764 100.152243 99.7502348  
100.566797 100.332778 99.7444601 100.190969  
100.153327 99.8174861 99.666475 100.210169  
99.9099948 99.728953 100.115624 99.6011323  
100.168986 100.005318 99.8380422 99.6888295  
99.6450217 99.6561662 99.5378562 99.9131751  
99.4796334 99.5390325 100.112233 99.6007864  
100.068345 99.759321 99.3527265 99.8597265  
99.7333461 99.5734175 99.6884013 99.9676615  
99.7748691 99.4684953 99.9144449 99.9498453  
99.6480127 99.7500017 98.9736513 100.306688  
99.9816044 100.186722 100.127604 100.032007  
100.146113 100.109758 99.7485289 99.8498671  
99.8406725 99.9167846 99.9469952 99.8095644  
99.532241 99.8133085 100.039673 99.6824295  
100.24429 100.001944 99.6908878 100.026126  
99.7224375 99.5753456 98.8676369 99.9143859  
99.69499 99.6711092 100.175299 99.7004187  
100.507328 100.053039 100.101157 99.9922236  
100.301824 99.9273893 99.8724008 99.9797696  
100.463694 100.475138 100.154277 99.9301264  
100.365692 100.366841 100.36834 100.013845  
100.293203 100.143018 99.8658455 99.9206129  
100.058668 100.07714 99.8296785 99.8887859  
100.33543 100.161817 99.4829276 99.8989913  
100.113387 99.8499429 99.5410208 99.9877263  
99.870935 99.6335107 100.184567 99.6068404  
100.261005 99.9620956 99.8766956 99.8962237  
99.8769171 99.9645057 99.7663863 100.205326  
99.6349928 99.606999 100.58489 100.090472  
100.005005 99.9870005 99.5591043 99.768224  
99.8339866 100.164549 99.8669757 99.7531753  
99.6923509 99.8640825 99.9289117 99.8652616  
99.6932306 99.9363872 99.5548095 99.7810239  
100.103738 100.509165 100.266191 99.938979  
100.290338 100.547352 100.054855 100.19445  
100.026729 100.089874 100.087245 100.117159  
99.8838996 99.8876366 99.9496464 100.055073  
100.387587 99.5409005 100.184184 100.218366  
100.335918 99.9143673 100.442841 100.191441  
99.9656809 98.7925921 100.974397 100.174652  
100.039235 99.1423831 100.105162 100.035751  
100.12875 99.1507842 100.164658 99.9505409  
100.182228 99.1571996 100.152254 100.02799  
100.211683 100.529327 100.096663 100.479221

99.8314082 99.9708838 99.2212254 100.269523  
100.60216 99.8573926 99.4580598 100.481122  
99.901671 99.892219 100.066111 99.5962394  
99.647606 99.1700304 100.052098 99.2930955  
99.8567489 99.3722676 99.6163323 99.7324483  
99.9421502 98.9248712 101.159546 99.7509791  
100.13599 99.1011414 99.8448971 99.7939007  
99.9266825 98.5203967 99.9677937 99.9708138  
100.351221 98.9676404 99.3452706 100.102113  
100.102915 98.3392385 100.393682 99.994096  
100.261706 99.2486952 99.4844769 99.9977388  
100.210037 99.4029698 99.8419108 99.7600069  
100.276845 100.165331 100.127215 99.8783185  
100.22353 100.25148 99.375363 99.9876024  
96.5637772 96.3455825 99.7438232 97.8535579  
99.1031105 99.2503754 101.196301 98.367192  
101.523639 102.146462 99.7500255 100.663578  
100.060297 99.623384 99.9671046 99.7091661  
100.424281 100.842154 100.206466 99.9744566  
100.559541 100.402853 100.484878 100.064893  
100.202139 100.540325 99.9296613 100.157863  
100.986713 100.960685 100.31558 100.324323  
100.285237 99.867474 100.193372 99.8818029  
99.3749469 99.9122289 100.308918 100.05444  
99.7724993 98.1582331 100.216803 100.534497  
100.4539 100.036565 99.8635039 100.60561  
98.8630323 97.2554974 100.282271 101.336704  
99.9451121 99.5369291 99.5336355 101.194951  
100.702206 100.362986 98.8768851 100.532121  
100.446002 99.8576981 100.521633 100.212505  
100.64412 100.752949 100.481203 99.5773919  
100.386928 100.443178 99.8784352 99.9754069  
101.00432 100.692309 99.8171018 100.526261  
100.979802 100.551781 100.380589 99.6575334  
100.520543 101.014758 100.57975 99.5994071  
100.412763 101.16109 99.2049157 99.1054124  
100.067537 100.175718 100.831286 100.918099  
100.076258 100.372151 101.122333 100.579794  
99.7713475 99.9757717 101.505954 100.087067  
99.9600862 100.716901 100.999207 99.5396969  
101.446136 101.962401 100.00248 100.808657  
101.546511 101.991118 98.6928847 100.328125  
100.937019 101.952931 100.216803 100.202052  
100.355829 101.517602 100.801653 100.191124  
100.369651 101.11664 99.7468095 100.48524  
99.0876428 99.9241432 99.5219201 100.711252

99.6043294 99.7723125 100.526457 100.089759  
102.159953 102.632198 99.5979552 100.751797  
93.681522 93.5758181 100.550347 95.6314528  
95.1624707 95.7171806 100.931901 96.4030918  
101.137111 98.5130648 96.9760073 103.600147  
98.5673362 96.9521415 99.1208407 98.9766475  
99.9209233 99.4252709 100.09092 100.020704  
99.8264717 99.4865225 99.3728362 99.6914273  
100.206582 100.400562 99.821696 100.244657  
99.9582761 99.8636553 99.5200824 100.51264  
100.546871 100.354432 99.9553892 100.630001  
100.672916 100.672604 99.6847869 100.061409  
98.4026218 98.9354107 99.9590646 99.8582039  
99.748475 98.8900448 99.134164 100.34523  
102.097918 103.072721 99.2623441 101.71698  
98.8623741 100.276836 100.658771 101.23423  
100.07741 100.568125 100.763061 100.858706  
99.8498378 100.747603 99.9558486 99.9328021  
99.9515296 101.583436 100.382886 100.383717  
99.8118267 101.153452 100.536104 99.8007111  
100.163634 101.253044 100.121472 99.9541837  
99.9400111 100.145168 100.629138 99.6222142  
99.8022828 99.8821377 99.5469589 99.2693382  
100.651196 101.643924 99.6018604 99.3151107  
100.573693 101.340568 100.486027 99.931535  
99.8906461 101.140316 100.615815 99.52275  
99.6454668 100.620976 100.333957 99.5883203  
100.00797 100.615324 99.5003271 99.5566438  
100.121674 100.293791 99.5012459 99.6974458  
100.199013 100.224597 99.5285818 99.5884787  
99.8616853 99.3126962 99.4525467 99.7316564  
99.872052 99.2253249 99.6379254 99.7451189  
102.578239 102.072379 100.777993 101.430466  
100.339209 100.490224 100.523241 99.5377963  
99.8008019 100.183202 100.204628 99.8086303  
100.123484 100.354279 100.068868 99.6719462  
100.073626 100.269046 100.428828 99.6480305  
100.235707 100.653205 100.328214 99.2611023  
98.84378 98.8080196 99.4745992 99.3770382  
99.7594999 99.8894695 99.2526961 99.7535132  
100.550162 100.624183 99.8926774 100.270632  
99.0861619 99.8699179 99.2226037 101.023898  
99.0020769 101.117099 99.4470336 100.913506  
99.6937899 100.139832 100.999431 100.263209  
99.7023597 100.695977 100.320544 100.309639  
99.4210419 101.107041 100.187056 100.035953

|            |            |            |            |
|------------|------------|------------|------------|
| 99.21405   | 100.450043 | 98.2479342 | 99.5296408 |
| 98.9322377 | 99.4771712 | 100.499596 | 98.7875447 |
| 100.648161 | 101.599981 | 101.015688 | 99.9898384 |
| 100.734517 | 101.720117 | 100.90441  | 99.8965039 |
| 100.139416 | 101.269722 | 100.536231 | 99.8086968 |
| 99.6405587 | 100.755969 | 99.9926632 | 99.7153623 |
| 99.3284229 | 99.9714886 | 99.451614  | 99.6204485 |
| 102.578163 | 103.709783 | 99.806284  | 101.576841 |
| 101.590172 | 102.114347 | 100.91334  | 101.001831 |
| 100.107279 | 100.866004 | 100.255059 | 100.081752 |
| 99.4480695 | 100.136924 | 99.6521892 | 99.301753  |
| 99.8561204 | 101.168716 | 99.0303146 | 98.2300645 |
| 100.572352 | 101.642985 | 99.959234  | 100.370599 |
| 99.764655  | 100.487385 | 99.7607196 | 99.8473888 |
| 99.7251024 | 99.9384321 | 99.8724555 | 99.7488427 |
| 99.8843016 | 99.4168736 | 99.8937494 | 99.9361434 |
| 99.7849257 | 99.0529458 | 99.8440636 | 99.8413876 |
| 99.8233247 | 98.9132208 | 99.7737707 | 99.8998203 |
| 100.057179 | 99.6058773 | 99.5049634 | 99.6806185 |
| 99.8996282 | 99.3582595 | 100.282536 | 99.9118227 |
| 99.7766856 | 99.546192  | 100.502115 | 99.92193   |
| 99.3920366 | 99.2150146 | 99.444974  | 99.7955889 |
| 99.7572389 | 99.7494283 | 99.430778  | 100.012422 |
| 99.67286   | 99.3322428 | 99.9180199 | 100.161346 |
| 99.695438  | 99.7071895 | 99.590597  | 100.152818 |
| 99.8938601 | 99.3985089 | 99.8456664 | 100.092333 |
| 99.9108348 | 99.6866822 | 99.7142393 | 100.036585 |
| 99.6080927 | 99.0022898 | 99.8671893 | 100.059642 |
| 99.8637013 | 99.561802  | 100.239719 | 99.952094  |
| 100.04037  | 99.9277193 | 98.7869227 | 100.971351 |
| 99.9447841 | 99.2973498 | 98.2364858 | 100.421609 |
| 99.7872329 | 98.4571633 | 100.362445 | 100.319431 |
| 100.167103 | 99.4274334 | 99.5267152 | 100.220095 |
| 99.8918825 | 99.2561822 | 99.681268  | 100.243626 |
| 99.8673269 | 99.1609917 | 100.497307 | 100.152976 |
| 99.6333074 | 98.5929092 | 100.136683 | 100.193248 |
| 100.39041  | 100.843201 | 99.4083393 | 100.352279 |
| 100.204842 | 99.8484449 | 99.4316939 | 100.337276 |
| 99.8726006 | 99.8475266 | 100.244298 | 100.029162 |
| 99.8599108 | 100.285526 | 100.109894 | 99.7742688 |
| 101.078625 | 101.53448  | 99.4710762 | 100.874858 |
| 101.065606 | 100.761937 | 100.327184 | 101.616322 |
| 100.310646 | 100.551508 | 101.517355 | 100.377864 |
| 99.5963917 | 99.7038226 | 101.654277 | 99.348973  |
| 99.5434901 | 99.6883656 | 100.850603 | 99.9181398 |
| 100.545489 | 101.291301 | 100.666742 | 100.350858 |

100.362723 100.728422 100.739325 100.399657  
99.740429 100.245582 101.491024 100.25705  
100.335036 100.249561 101.381119 100.488096  
100.738967 100.965021 100.783058 100.494097  
99.7753672 98.0568121 100.342067 99.6624569  
100.231705 99.4705905 99.5757142 99.8598649  
99.4225251 98.7107496 100.471433 100.261314  
99.7524596 99.5781772 99.8122372 100.375495  
99.4910829 99.3085217 100.214303 99.7701627  
101.238319 101.446483 100.468915 101.180919  
98.9304249 98.3460566 99.4218483 96.9266979  
99.7862441 98.941074 100.411444 99.5177964  
100.066244 100.151769 100.022658 99.8938191  
100.64915 100.708527 101.401498 100.637021  
100.190175 100.204262 100.246359 100.392709  
99.7041725 100.336641 100.200107 99.8500735  
99.8773799 100.112897 100.116305 100.012896  
99.9975209 100.202884 100.062498 100.007526  
99.6725304 99.2064444 99.9324449 99.9811524  
100.436884 99.6969358 99.8944363 100.495677  
102.052608 102.151076 100.268569 101.703656  
99.3653386 99.7056591 99.1649473 99.0290141  
99.8287632 100.008065 100.142637 99.8947667  
99.2417368 99.8625245 100.01327 99.4249356  
99.64369 99.7214221 100.241321 99.6717746  
100.827301 100.960583 100.09753 100.201776  
100.029822 99.9156292 100.066849 100.286898  
99.4310948 99.9024678 100.446247 99.8889234  
99.1474698 99.3108173 100.798856 98.2412772  
100.605477 100.544621 100.039601 99.9124544  
100.94909 100.519982 101.830353 100.741884  
99.16395 100.663074 101.734645 100.634968  
100.894705 103.040542 101.310827 102.37279  
100.795824 100.974968 100.354431 99.9200349  
98.9625614 99.3806033 98.5655115 98.6016653  
99.4638905 100.002403 98.3711185 99.100081  
100.622287 100.741736 98.3544039 99.9952079  
99.6608294 99.9035391 98.805469 99.5673852  
99.9718117 100.59038 100.025634 100.121391  
99.8648549 100.003474 99.8404001 100.017633  
99.9162733 99.441513 99.9010764 99.3770839  
100.561475 100.027195 98.7571569 100.398552  
100.142053 100.184213 102.600369 99.5054781  
98.0986669 95.5772669 97.1035568 98.5260185  
98.4134396 96.8484126 93.0666386 99.1057664  
98.7142041 98.3657987 104.195583 100.155029

|            |            |            |            |
|------------|------------|------------|------------|
| 100.046632 | 100.658177 | 97.9463846 | 99.2507428 |
| 100.340969 | 100.325163 | 100.227583 | 99.6976745 |
| 100.391234 | 100.224922 | 100.113329 | 99.8821326 |
| 100.147656 | 99.9721007 | 99.7307249 | 100.151555 |
| 100.636468 | 100.385456 | 100.521078 | 100.521509 |
| 101.408868 | 100.31873  | 99.8579756 | 100.828301 |
| 99.940961  | 100.314761 | 98.6830682 | 100.352859 |
| 97.8389295 | 101.177151 | 100.189413 | 100.295168 |
| 98.8464658 | 101.179289 | 102.151483 | 99.421891  |
| 99.0243439 | 100.140236 | 99.9953114 | 100.336895 |
| 99.0817387 | 101.120324 | 99.9601453 | 100.992147 |
| 98.8423188 | 100.461672 | 100.878255 | 100.514493 |
| 99.2609324 | 100.414179 | 100.348585 | 101.037352 |
| 99.3988752 | 100.443652 | 100.132048 | 100.485252 |
| 99.2167115 | 100.210001 | 100.50126  | 100.250693 |
| 99.1602803 | 99.5864739 | 99.9564829 | 100.557011 |
| 99.7859732 | 100.488397 | 99.9317619 | 100.250377 |
| 99.6635407 | 100.051027 | 99.4773997 | 100.310123 |
| 99.9498216 | 100.590104 | 100.239172 | 100.638411 |
| 100.038098 | 100.481831 | 99.7010329 | 100.579455 |
| 100.210857 | 100.419676 | 99.9846373 | 100.498213 |
| 100.420741 | 100.561852 | 99.942749  | 100.482091 |
| 100.087269 | 100.293383 | 100.286096 | 100.391365 |
| 99.9587318 | 100.025677 | 100.013478 | 100.426138 |
| 100.033478 | 100.152123 | 100.14807  | 100.454747 |
| 99.8671549 | 99.9245806 | 99.7557395 | 100.651846 |
| 99.289808  | 100.822839 | 100.230245 | 100.424241 |
| 99.825244  | 100.509624 | 100.160202 | 100.236468 |
| 99.4176856 | 99.947793  | 100.585494 | 100.431196 |
| 99.7498375 | 100.229854 | 99.9326775 | 100.29574  |
| 100.112845 | 100.353704 | 100.170045 | 100.712699 |
| 99.4219757 | 100.039115 | 99.9036075 | 100.074299 |
| 102.702408 | 103.613517 | 98.4299632 | 101.19952  |
| 100.817409 | 100.851243 | 100.826981 | 100.117765 |
| 99.5303829 | 99.1361231 | 100.163407 | 100.193318 |
| 99.6072745 | 99.8694512 | 99.9484715 | 99.9604969 |
| 97.8387681 | 97.1128279 | 100.656681 | 99.9367881 |
| 99.3714847 | 98.8235195 | 99.6943949 | 99.9298335 |
| 100.295009 | 100.221608 | 100.183778 | 100.197743 |
| 99.7953784 | 99.8131001 | 99.9516761 | 100.310123 |
| 100.12885  | 100.079432 | 99.8978851 | 100.422187 |
| 97.5151964 | 97.1630705 | 99.5183724 | 98.4372843 |
| 99.2203416 | 98.8395544 | 99.310991  | 99.9103923 |
| 99.7212919 | 98.9383597 | 99.2734517 | 99.8632908 |
| 99.5614036 | 99.8222629 | 100.282433 | 99.3775761 |
| 99.8930604 | 99.7724784 | 99.9166547 | 99.826305  |

99.7467024 99.9729907 99.9642654 99.616561  
99.4760968 99.2837967 100.028586 99.7151897  
99.2549923 99.2462293 99.5769703 99.7381082  
99.7041315 99.6616088 99.4178863 99.5141389  
99.970117 100.142349 99.9535072 99.8533331  
100.018133 100.101881 99.6726496 99.7033353  
99.7656778 100.23077 100.225438 99.8414787  
100.403746 100.548872 99.4657259 99.5765721  
99.240307 99.9648969 100.723062 98.818364  
99.3589444 99.8444063 100.227727 99.1553454  
99.6510004 100.625228 99.6282434 99.1425426  
99.7803631 100.767862 100.274651 99.3846887  
99.7297071 100.764961 100.186983 99.3483352  
99.5978693 100.164187 99.5831505 99.146336  
99.5647037 100.086304 100.002949 99.5093971  
99.7437323 99.6073956 99.2365992 99.5101874  
99.4241208 99.2104944 99.8729352 99.4033397  
100.078194 100.143571 98.0868453 99.2653543  
99.8325042 99.866397 98.2674457 99.1066633  
100.868231 100.786035 101.374963 101.457946  
101.384031 101.182325 100.352018 100.11903  
101.34839 100.744344 99.1274149 100.541521  
100.300784 99.9639806 100.995679 99.9734578  
100.196337 99.7286498 99.6280145 99.9179791  
100.330979 100.274904 100.723291 100.036365  
100.429651 99.6347313 100.528499 100.183834  
99.8486745 98.9470644 99.6451818 98.9626717  
100.195512 99.4213911 99.9782282 99.5489118  
99.777063 99.2178246 100.406954 99.256503  
100.314974 99.8999938 100.113507 99.917663  
102.595156 101.81639 99.8832356 101.840923  
99.3051533 98.9440101 99.781605 99.7727231  
100.029188 99.1008464 100.24993 100.468972  
99.5074475 98.6474414 99.5536227 100.042688  
101.467193 101.003193 100.931359 99.9318883  
100.919712 100.070422 99.7589441 99.2561869  
100.126045 99.4490322 100.383377 100.412545  
100.063509 99.3157137 100.197283 100.694522  
100.62122 101.063973 100.261146 100.56523  
101.462903 100.913856 101.062059 100.661488  
100.038593 99.7341475 98.9699332 100.354538  
100.511988 99.7433103 101.074649 100.418551  
100.33923 99.4504066 99.8479853 100.357066  
100.421731 100.08157 99.9743369 100.134678  
100.313159 99.6674119 100.133192 99.2764184  
100.11631 99.4123811 99.4151395 99.7072867



|            |            |            |            |
|------------|------------|------------|------------|
| 100.280323 | 100.669668 | 100.695136 | 100.738146 |
| 103.24428  | 102.811316 | 101.023147 | 102.051457 |
| 99.4508513 | 97.234082  | 99.8999451 | 96.2587598 |
| 98.6764903 | 98.0391853 | 98.9424655 | 99.2266299 |
| 100.487238 | 100.981813 | 100.439    | 98.8300604 |
| 100.025723 | 100.430519 | 99.2544532 | 98.0546239 |
| 100.423711 | 100.840706 | 99.7447524 | 100.568865 |
| 100.506543 | 100.713954 | 100.169358 | 100.272031 |
| 100.289069 | 100.285747 | 100.60289  | 100.093266 |
| 100.146506 | 99.9962031 | 100.688727 | 100.079989 |
| 100.267948 | 99.792942  | 99.6980572 | 100.268079 |
| 100.279993 | 99.632746  | 99.629159  | 100.155542 |
| 99.9549367 | 98.937138  | 100.171418 | 99.8647133 |
| 99.8735626 | 99.2387479 | 100.582281 | 100.080928 |
| 100.49255  | 99.9422936 | 100.012026 | 100.465932 |
| 100.570684 | 99.7931816 | 99.1263148 | 100.567165 |
| 99.8998815 | 99.483652  | 100.087156 | 100.372449 |
| 101.339031 | 101.429288 | 99.458083  | 100.815346 |
| 100.799987 | 96.6463997 | 100.462578 | 95.3863795 |
| 97.4354476 | 98.2550061 | 101.746916 | 99.9132599 |
| 101.268792 | 101.852027 | 102.643195 | 100.21095  |
| 100.746198 | 100.744993 | 99.2616413 | 100.108925 |
| 99.9462685 | 99.7655287 | 100.230754 | 99.7085782 |
| 100.316707 | 99.8590292 | 100.870395 | 100.00611  |
| 100.518375 | 100.535686 | 99.9626279 | 100.298422 |
| 100.202713 | 99.5912082 | 100.783777 | 99.9732091 |
| 100.531699 | 99.8568903 | 99.8093804 | 100.154006 |
| 100.068158 | 99.0467051 | 100.219266 | 100.152108 |
| 99.629784  | 98.5727857 | 100.160448 | 100.276752 |
| 99.6115253 | 98.3750901 | 100.104847 | 100.251443 |
| 100.329866 | 99.3507346 | 100.072222 | 100.2864   |
| 100.182151 | 99.1706086 | 100.596526 | 100.303009 |
| 100.366713 | 99.7966955 | 100.3006   | 100.487602 |
| 99.8664894 | 99.4200961 | 100.369067 | 99.8659648 |
| 100.052038 | 99.3091788 | 99.927705  | 100.099118 |
| 100.094477 | 99.3547069 | 100.539776 | 100.346982 |
| 99.840993  | 98.6653696 | 100.493365 | 100.131703 |
| 99.2743147 | 98.9426628 | 99.8387892 | 101.150049 |
| 102.148501 | 103.060506 | 99.3425155 | 100.798579 |
| 100.304863 | 99.9910299 | 99.2770349 | 99.7433773 |
| 100.03016  | 100.090947 | 99.2267183 | 99.7274014 |
| 99.772235  | 99.2363034 | 100.30979  | 99.7781763 |
| 99.5154614 | 98.8456484 | 98.6144176 | 99.511331  |
| 99.7765118 | 99.9494741 | 98.8905847 | 99.3667568 |
| 100.652108 | 100.805187 | 98.1213604 | 100.093108 |
| 100.556702 | 101.377802 | 96.2846881 | 100.32895  |

|            |            |            |            |
|------------|------------|------------|------------|
| 100.17294  | 100.183225 | 97.8571406 | 100.221864 |
| 102.039113 | 101.391552 | 100.791589 | 100.238315 |
| 101.374232 | 101.817193 | 99.3160935 | 99.9333484 |
| 102.533085 | 103.809121 | 100.089453 | 101.918792 |
| 99.0693564 | 101.380552 | 99.2411929 | 100.875453 |
| 99.7386784 | 100.27092  | 100.150798 | 100.291304 |
| 100.269826 | 101.30844  | 99.5483772 | 100.870866 |
| 100.40175  | 100.997383 | 99.1635353 | 100.198137 |
| 99.8511916 | 100.586714 | 99.4502712 | 99.6051302 |
| 99.6287971 | 99.9707104 | 99.3551521 | 99.9885523 |
| 100.359146 | 100.050614 | 99.5975451 | 100.133917 |
| 100.530383 | 100.448755 | 99.7781336 | 100.222971 |
| 99.8021727 | 99.5939582 | 98.9624985 | 99.67805   |
| 100.340065 | 99.8374874 | 98.8531345 | 100.210475 |
| 100.738302 | 100.304073 | 98.899775  | 100.366755 |
| 100.46327  | 100.061919 | 99.7360882 | 100.115885 |
| 100.447479 | 100.45731  | 99.2756564 | 100.375771 |
| 100.478568 | 100.53813  | 99.3585985 | 100.114303 |
| 100.436129 | 100.60352  | 99.8006497 | 100.433664 |
| 100.186099 | 100.437449 | 100.180207 | 99.9656166 |
| 100.133462 | 100.350824 | 99.4865727 | 100.067957 |
| 100.251568 | 100.357393 | 99.2993213 | 100.460396 |
| 100.11767  | 99.8164039 | 99.867279  | 100.524774 |
| 100.457513 | 100.384129 | 99.1019606 | 100.435878 |
| 99.7376914 | 99.6125972 | 99.5488367 | 100.142617 |
| 100.110104 | 100.411324 | 98.9519297 | 100.538693 |
| 99.9395243 | 100.093544 | 99.295875  | 100.355208 |
| 101.109398 | 100.805798 | 99.2016749 | 100.854574 |
| 97.9712012 | 98.387618  | 97.3139966 | 99.4983604 |
| 99.161637  | 99.1686225 | 95.6032307 | 100.576972 |
| 100.525777 | 98.9802464 | 98.7697329 | 100.727241 |
| 100.442544 | 99.5788331 | 97.3330664 | 100.051981 |
| 100.607695 | 99.3495124 | 98.6203913 | 99.7378411 |
| 101.046069 | 99.5123744 | 101.462248 | 100.342395 |
| 99.3057328 | 100.160767 | 100.978611 | 99.0413858 |
| 99.4381497 | 98.8228844 | 101.775176 | 99.2987405 |
| 99.9768642 | 99.7655287 | 101.321637 | 99.8023775 |
| 100.285947 | 100.158323 | 100.860516 | 99.9382519 |
| 100.431523 | 100.124253 | 99.7645779 | 100.318985 |
| 100.261108 | 99.827404  | 100.348389 | 100.216802 |
| 100.082633 | 99.6972366 | 100.506231 | 100.439674 |
| 100.278051 | 100.136781 | 100.399395 | 100.315505 |
| 100.134942 | 99.8316818 | 100.36608  | 100.047869 |
| 99.9044873 | 99.5824998 | 100.401922 | 99.8726083 |
| 100.05286  | 100.21149  | 100.268434 | 100.107027 |
| 100.448959 | 101.135495 | 100.750922 | 100.284344 |

|            |            |            |            |
|------------|------------|------------|------------|
| 100.214557 | 101.219523 | 101.680976 | 100.094373 |
| 100.084936 | 101.027633 | 100.454307 | 99.397285  |
| 99.3843605 | 99.3133038 | 100.174004 | 99.4210116 |
| 98.6883907 | 100.534158 | 101.995282 | 99.4535962 |
| 98.9912223 | 99.959252  | 102.069264 | 98.9548627 |
| 99.324814  | 99.8069317 | 101.509578 | 99.1728312 |
| 99.5384904 | 99.4697492 | 100.858448 | 99.1427775 |
| 99.5080592 | 99.2208728 | 100.950121 | 99.1921289 |
| 99.584713  | 98.4759241 | 100.756666 | 98.8295862 |
| 99.6945943 | 99.962002  | 100.846271 | 98.8166156 |
| 99.9740679 | 100.092017 | 100.966204 | 99.1117747 |
| 98.3120307 | 99.7490286 | 101.332435 | 97.425445  |
| 97.6532363 | 97.2379586 | 101.926815 | 96.4771711 |
| 99.1766058 | 99.8743071 | 100.435926 | 98.7043096 |
| 98.4284917 | 99.7927233 | 102.95911  | 100.136606 |
| 99.7140044 | 100.742701 | 100.481877 | 100.43572  |
| 99.6753486 | 100.370838 | 100.870855 | 100.681686 |
| 99.4986831 | 100.023266 | 100.656952 | 100.346033 |
| 99.4059091 | 99.4165822 | 100.392272 | 100.515441 |
| 99.6890015 | 99.7291673 | 99.9617089 | 100.614619 |
| 99.3455401 | 99.8475708 | 99.7186267 | 100.246223 |
| 99.3850417 | 99.5368192 | 99.9243011 | 99.9202805 |
| 99.6556413 | 99.9071817 | 100.116193 | 99.8909977 |
| 99.5341405 | 99.9340833 | 100.352821 | 99.9310689 |
| 99.0804218 | 99.3178841 | 100.374011 | 99.7217737 |
| 99.5941966 | 100.011743 | 99.6374442 | 100.3381   |
| 99.4685301 | 100.046596 | 99.7025854 | 100.294638 |
| 99.3319285 | 99.7868858 | 100.300237 | 99.6209791 |
| 99.6907029 | 100.17569  | 100.236469 | 100.079333 |
| 99.5764922 | 99.8911084 | 100.091275 | 100.290477 |
| 99.5166097 | 99.9027827 | 99.854647  | 99.9192017 |
| 99.3761895 | 100.02274  | 100.431696 | 100.137128 |
| 99.3123148 | 99.5144858 | 100.296312 | 99.9341513 |
| 99.7703727 | 99.9897477 | 99.6957181 | 100.408996 |
| 99.3317549 | 99.8378127 | 99.7339788 | 100.405605 |
| 99.1252036 | 99.3749019 | 99.9325418 | 99.7510565 |
| 100.142686 | 100.627773 | 99.7545807 | 101.246947 |
| 99.6356804 | 100.101753 | 100.406385 | 100.562499 |
| 99.6827186 | 99.8777422 | 99.9564793 | 100.292789 |
| 99.2560773 | 99.7423882 | 100.169366 | 100.085497 |
| 99.3147448 | 99.6620217 | 99.8622992 | 100.098598 |
| 99.7387825 | 100.382782 | 100.011614 | 100.543543 |
| 99.332102  | 99.9171641 | 100.089312 | 100.217424 |
| 99.8151545 | 100.3706   | 99.6345011 | 100.610739 |
| 99.6172817 | 100.141513 | 99.9272442 | 100.299262 |
| 99.5369177 | 100.01225  | 99.5489541 | 100.409304 |

|            |            |            |            |
|------------|------------|------------|------------|
| 99.481548  | 99.9965154 | 99.7127883 | 100.134045 |
| 99.2927011 | 99.9176716 | 100.035551 | 100.002581 |
| 99.3925053 | 99.9384823 | 100.002196 | 99.9865522 |
| 99.6212739 | 99.8281688 | 100.031627 | 100.396204 |
| 99.7514533 | 99.8291839 | 99.937447  | 100.382641 |
| 99.6205796 | 99.8768962 | 100.006905 | 100.408533 |
| 99.4004896 | 99.6366428 | 100.02888  | 99.9289112 |
| 99.5999245 | 99.6471328 | 100.321623 | 100.103529 |
| 99.4291291 | 99.4684654 | 100.140915 | 100.016143 |
| 99.5848237 | 99.7813024 | 100.169366 | 100.139285 |
| 99.415764  | 99.4009576 | 100.388138 | 99.7636944 |
| 99.3610887 | 99.6254761 | 100.358707 | 100.22775  |
| 99.2132048 | 99.6505166 | 100.218614 | 100.122486 |
| 99.7346168 | 99.9049822 | 100.206253 | 100.335018 |
| 99.788945  | 99.8895857 | 100.508021 | 99.8732739 |
| 100.268005 | 100.198531 | 100.170739 | 100.357519 |
| 100.004001 | 99.968091  | 100.324566 | 100.053594 |
| 100.398011 | 100.371277 | 99.8797617 | 100.138361 |
| 100.267485 | 100.146082 | 99.9890499 | 99.7943643 |
| 100.323375 | 100.243536 | 99.8617106 | 100.05791  |
| 100.250822 | 100.160463 | 99.9631504 | 100.138515 |
| 100.08315  | 100.081281 | 100.002392 | 100.171034 |
| 100.231381 | 100.113597 | 99.6849267 | 99.9985736 |
| 100.10207  | 100.1652   | 100.251577 | 100.023233 |
| 100.14338  | 100.008528 | 99.7932338 | 100.079487 |
| 100.40426  | 100.291587 | 100.098534 | 100.058835 |
| 100.318341 | 100.235584 | 100.035944 | 99.5346718 |
| 100.465878 | 100.27416  | 100.074597 | 100.115705 |
| 100.514999 | 100.319504 | 100.302787 | 99.9970324 |
| 100.38725  | 100.005652 | 100.035748 | 99.9454021 |
| 100.191286 | 100.074513 | 100.393828 | 99.9134992 |
| 99.9968849 | 99.7366356 | 100.311813 | 99.5238834 |
| 100.362602 | 100.094139 | 100.179372 | 100.103067 |
| 100.07777  | 99.8752043 | 100.236273 | 99.5642629 |
| 100.397664 | 100.265362 | 99.8016707 | 99.8678796 |
| 100.210032 | 100.190918 | 100.073027 | 99.8418333 |
| 100.319209 | 100.119349 | 99.725738  | 99.9387749 |
| 100.247524 | 100.023925 | 99.6415646 | 99.9840863 |
| 100.212462 | 100.111566 | 99.9360736 | 99.7712463 |
| 100.244052 | 99.97249   | 99.6568688 | 99.8057692 |
| 100.333095 | 100.112412 | 100.085388 | 99.8672632 |
| 100.52038  | 100.225771 | 99.9558907 | 99.96328   |
| 100.550408 | 100.224587 | 100.128947 | 99.9794627 |
| 100.427866 | 100.222557 | 100.145232 | 100.082415 |
| 100.448174 | 100.004975 | 99.8487608 | 100.057602 |
| 100.479417 | 100.269423 | 100.174663 | 100.072397 |

|            |            |            |            |
|------------|------------|------------|------------|
| 100.128626 | 99.78181   | 99.9076233 | 99.9549576 |
| 100.391415 | 100.159955 | 99.9133134 | 100.044039 |
| 99.9602611 | 99.7061809 | 100.121491 | 99.6690646 |
| 100.475772 | 100.114781 | 99.7110224 | 100.227904 |
| 99.8776406 | 99.7007668 | 99.8473873 | 99.7677015 |
| 100.323375 | 99.9515101 | 99.7541883 | 100.131117 |
| 100.058677 | 99.7760575 | 99.9513779 | 99.731175  |
| 100.224265 | 100.002099 | 100.078129 | 99.8227224 |
| 100.156572 | 99.8750351 | 99.9574603 | 99.5359048 |
| 100.384646 | 100.233554 | 99.9804167 | 100.218657 |
| 100.143207 | 100.031369 | 100.01593  | 99.8839081 |
| 100.763902 | 100.418143 | 99.450065  | 99.7677015 |
| 100.601091 | 100.316628 | 100.101477 | 99.6840143 |
| 99.8698298 | 99.6161705 | 100.289641 | 99.6034094 |
| 100.123593 | 99.8640376 | 99.859356  | 99.7959055 |
| 100.216975 | 99.9246085 | 99.9325418 | 99.5543992 |
| 99.9942813 | 99.6388423 | 99.8697551 | 99.7357986 |
| 100.146852 | 99.9926239 | 99.7194594 | 99.7310209 |
| 100.370413 | 100.309014 | 100.252166 | 99.5354424 |
| 100.180178 | 100.091263 | 99.9743343 | 99.5352883 |
| 100.371628 | 100.20919  | 99.9103703 | 100.025853 |
| 100.501113 | 100.357065 | 100.134833 | 100.030476 |
| 99.8976014 | 99.700936  | 99.9982717 | 99.4793426 |
| 100.386555 | 100.073329 | 99.9810053 | 100.126031 |
| 100.070133 | 99.9750279 | 100.240589 | 99.395193  |
| 100.454596 | 100.13593  | 99.6001646 | 99.9341513 |
| 100.511528 | 100.140329 | 99.4508499 | 99.8600195 |
| 100.110749 | 100.022402 | 99.6747238 | 99.8398298 |
| 100.331533 | 100.050319 | 99.5575873 | 99.8438369 |
| 100.317709 | 100.328461 | 99.770538  | 99.9877868 |
| 100.155273 | 100.108641 | 99.8831872 | 99.5710856 |
| 100.59637  | 100.457677 | 100.154998 | 100.099904 |
| 100.429591 | 100.44379  | 100.43721  | 99.6040885 |
| 100.574828 | 100.449717 | 99.8443291 | 99.6733331 |
| 100.379209 | 100.407718 | 100.117121 | 99.7098832 |
| 99.9596538 | 99.8710388 | 100.107112 | 99.4282783 |
| 100.42073  | 100.146745 | 99.81705   | 99.9945725 |
| 100.08526  | 99.9745133 | 99.983865  | 99.7957835 |
| 100.189323 | 100.061561 | 99.7685754 | 99.81722   |
| 100.387201 | 100.234131 | 99.8953549 | 99.7763518 |
| 100.181679 | 100.085101 | 100.141652 | 99.97036   |
| 100.139637 | 100.137769 | 99.7656317 | 99.7661733 |
| 100.557108 | 100.601288 | 99.9828838 | 100.208475 |
| 100.50968  | 100.486975 | 99.8812247 | 99.8001016 |
| 100.575523 | 100.581812 | 100.110448 | 100.205699 |
| 100.426985 | 100.408734 | 100.4796   | 99.5016868 |

|            |            |            |            |
|------------|------------|------------|------------|
| 100.553286 | 100.574191 | 99.6072554 | 100.187655 |
| 100.532612 | 100.643795 | 100.466451 | 100.050246 |
| 99.9513148 | 100.01719  | 100.60952  | 99.6242913 |
| 100.564752 | 100.450056 | 100.026256 | 100.253661 |
| 100.203569 | 99.9699408 | 99.8653282 | 99.4790165 |
| 100.143633 | 99.988739  | 99.9469695 | 100.447053 |
| 99.9959631 | 99.855289  | 100.133999 | 99.2301061 |
| 100.163264 | 100.127269 | 100.008985 | 100.1363   |
| 100.121917 | 100.084254 | 99.8771034 | 99.6963118 |
| 100.197141 | 100.179938 | 99.837264  | 100.16699  |
| 100.154404 | 100.26326  | 100.082973 | 100.034053 |
| 100.505163 | 100.503063 | 99.8072373 | 100.166681 |
| 100.323269 | 100.322703 | 99.6317871 | 99.9025034 |
| 100.614612 | 100.546248 | 99.9094851 | 99.9837771 |
| 100.605578 | 100.426855 | 100.272553 | 99.6941528 |
| 100.393455 | 100.261228 | 100.208967 | 100.202306 |
| 100.392065 | 100.40975  | 100.383829 | 99.8685751 |
| 100.431675 | 100.297977 | 100.146363 | 99.9853193 |
| 100.74682  | 100.61636  | 100.382848 | 100.271397 |
| 99.8295308 | 99.6173484 | 100.641117 | 99.5382368 |
| 100.264201 | 100.172825 | 100.276871 | 100.232842 |
| 100.007603 | 99.881708  | 100.222705 | 99.5894377 |
| 100.281921 | 100.027859 | 100.15382  | 100.018168 |
| 100.118442 | 100.010924 | 100.213677 | 99.6631546 |
| 99.9943996 | 99.9999162 | 100.168147 | 100.080473 |
| 100.198531 | 100.169777 | 99.9491283 | 99.6787308 |
| 100.376777 | 100.284598 | 99.9720899 | 100.118719 |
| 100.194883 | 100.320332 | 99.8396191 | 99.9492319 |
| 100.398319 | 100.564538 | 99.6502349 | 100.235463 |
| 100.19054  | 100.320332 | 100.122223 | 99.886773  |
| 100.442968 | 100.371137 | 100.012714 | 99.804574  |
| 100.419341 | 100.652094 | 100.33241  | 100.170691 |
| 99.8436028 | 100.058512 | 100.44192  | 99.6559063 |
| 100.266112 | 100.330323 | 99.9936777 | 100.341104 |
| 100.167434 | 100.487652 | 99.805471  | 99.8951009 |
| 100.330044 | 100.484942 | 99.7469876 | 100.25289  |
| 100.269239 | 100.453782 | 99.7840794 | 100.251502 |
| 99.9968318 | 100.403145 | 99.7725005 | 100.362078 |
| 100.011425 | 100.236502 | 99.790752  | 99.9917965 |
| 99.8719207 | 99.6117597 | 100.586951 | 99.6551352 |
| 99.6554544 | 99.7861931 | 100.041171 | 100.225902 |
| 99.8194545 | 99.692541  | 100.420136 | 100.36763  |
| 99.6078526 | 99.4722131 | 99.8827947 | 100.162055 |
| 99.6882891 | 99.7897495 | 99.676729  | 100.048858 |
| 99.4575771 | 99.296933  | 100.379315 | 99.7067988 |
| 99.9799801 | 99.7670562 | 99.8148912 | 100.258596 |

99.5765814 99.6364852 99.8939811 100.037446  
99.453755 99.4473182 100.098869 99.7974799  
99.8022553 99.8900063 99.4783172 100.188272  
99.3649795 99.5257286 100.117121 99.9799216  
99.5835306 99.6503722 99.9646322 100.000124  
99.362721 99.6772993 100.047059 99.9109855  
99.5691111 99.7660401 100.265488 100.259213  
99.5350602 99.9201511 100.227023 100.231762  
99.794785 99.7868705 100.253124 100.44659  
99.7044459 99.7882253 99.9868088 100.154035  
99.8295308 99.8519019 99.7895745 100.164831  
99.4061533 99.1719507 100.192286 99.6407928  
99.8682723 99.6671381 99.9379418 100.048858  
99.7173019 99.7396211 100.196211 100.164214  
99.8557639 99.916256 99.8541418 100.200764  
99.6849883 99.6854282 99.9932852 99.9025034  
99.6580603 99.5573975 100.219957 99.8898574  
99.7709841 99.7687497 99.6724115 100.123192  
99.3576829 99.5270834 100.065899 100.07307  
99.6754332 99.5900826 99.7611178 100.07122  
99.8173698 99.9494491 99.8835797 100.498254  
99.7124375 99.739113 99.8445254 100.080935  
99.9447131 99.8512245 99.5481833 100.239165  
99.5623356 99.7431775 99.8743558 99.9079011  
99.5779712 99.759266 100.13969 99.9631117  
99.4940601 99.72421 99.8368715 99.8597846  
99.4971873 99.2427401 100.081207 99.9405956  
99.7583019 99.5772118 99.4196375 100.158508  
99.4732127 99.5794134 99.9175315 99.8273985  
99.6290476 99.4984628 100.099654 99.8657991  
100.004476 99.8710388 99.8900561 100.198913  
99.7343273 99.8253136 100.301402 99.9102144  
100.08248 100.19789 99.592929 100.037291  
100.030709 100.053093 99.7385487 100.097745  
99.6959332 99.6828879 99.5672198 100.106382  
99.7040985 99.7489355 99.4186563 100.235926  
99.7274112 99.8107691 99.9022354 100.210898  
99.3710737 99.3073906 100.2566 100.02853  
99.5269064 99.3368022 99.9273509 100.281253  
99.5788506 99.7629329 99.5763224 100.107988  
99.2569695 99.3109402 99.5984947 99.9154375  
99.5423165 99.4754088 100.101982 99.9645009  
99.2935036 99.4806488 100.431231 99.9945869  
99.4212864 99.518343 100.043314 100.051828  
99.5345249 99.815502 99.8900701 100.18436  
99.3378293 99.5771663 100.159866 100.134834

99.580409 99.5322037 99.9532513 100.365494  
99.4060494 99.4838604 100.085304 100.198092  
99.8721625 99.5817302 99.7554666 100.474266  
99.4195549 99.5264566 99.7845065 100.295293  
99.1752438 99.4781133 99.4532957 100.14764  
99.4015476 99.7627639 99.8657394 100.201023  
99.5528785 99.6812903 99.960315 100.236664  
99.9812454 100.106407 99.7230912 100.452821  
99.9440187 100.10759 100.092564 100.126194  
100.041501 100.214588 99.9379465 100.038713  
100.115954 100.225575 99.3430229 99.8989288  
100.137251 100.21932 99.7586061 100.295139  
99.9424604 100.043865 99.7305474 99.9466036  
100.24443 100.489434 99.8741767 100.671754  
99.7814332 99.9884222 99.8469028 99.7704074  
100.280444 100.462727 99.7715563 100.074199  
100.165301 100.454106 100.336655 99.8776371  
99.8745865 99.9481925 100.263075 99.8762485  
100.24062 100.317021 100.030756 100.543696  
99.4874288 99.3974848 100.227167 99.9037117  
100.073879 99.951066 99.8508271 100.314116  
99.682566 99.7609045 100.031149 99.6816921  
99.7521713 99.8281794 99.8351299 100.189298  
100.137771 100.01496 99.5855445 99.9359577  
100.369096 100.398833 99.6983681 100.305013  
99.9145836 100.078009 100.229914 99.8015734  
100.287543 100.000085 99.7672395 99.9800839  
100.522504 100.290821 99.9764046 100.038405  
100.169803 99.9184427 99.9191099 100.080062  
100.105392 100.031864 99.8635811 100.220309  
99.7281038 99.7612426 99.90459 99.6366402  
99.7282769 99.8709446 99.8266927 100.123725  
100.08271 99.9747305 99.6761958 99.8231737  
100.213956 100.136326 99.8576946 100.245458  
99.7571925 99.9588415 100.151036 99.802962  
100.136732 100.118577 99.7497764 100.16168  
100.431256 100.412525 100.210685 100.384934  
100.080805 99.8582672 100.308989 99.8424596  
100.142792 99.9703357 99.712888 100.24407  
100.082364 100.024088 99.9008619 99.8446196  
99.804635 99.8714517 100.05391 99.8517168  
99.8468829 100.028483 99.6081092 99.5621194  
100.332042 100.389367 99.8047166 100.113697  
100.137424 100.098969 100.095703 99.7674759  
100.135174 100.136833 99.8268889 99.916209  
100.310399 100.38193 99.8102106 100.217687



99.7435139 99.8171923 100.334104 99.569988  
99.9800334 100.044034 100.241883 99.9290148  
99.9907685 99.8452517 99.591431 99.8811857  
100.024359 99.9054273 99.8843798 100.083611  
100.2285 99.9987331 99.7511499 100.280481  
100.485797 100.397481 99.7654736 100.442792  
100.187118 100.024595 100.213236 99.9842497  
100.479564 100.203769 99.9573718 100.033622  
100.421733 100.371112 100.649814 99.8685341  
100.029554 99.8006272 100.197146 99.6357145  
100.345028 100.150524 99.8922284 100.311339  
100.019857 99.9372053 100.022319 99.725664  
100.124092 99.9424454 100.197343 100.271224  
100.143311 99.8613098 100.253656 99.5272504  
100.102968 100.160666 99.8035393 100.048125  
99.9597751 99.7827097 100.293292 99.4144663  
100.106777 100.096603 99.8939944 100.029764  
100.11024 100.127029 100.243649 99.7204182  
99.8390913 99.8876788 99.8578908 100.034547  
100.265034 100.363505 99.8612265 100.122645  
100.226076 100.170132 100.155941 100.139154  
100.075611 99.8035007 99.8396428 99.7835218  
100.285639 100.296737 99.6212556 99.870077  
99.8501727 99.7301406 99.8906587 99.793859  
100.048946 99.8941021 100.254245 99.8995459  
99.9954435 99.883284 100.060581 100.058925  
100.373424 100.258874 100.415534 100.140851  
99.9488668 99.6885587 100.259935 99.5033359  
100.319056 100.323782 99.891836 100.313345  
99.7850693 99.8734801 100.11297 99.7339955  
100.338968 100.441936 100.29388 100.046428  
100.033536 100.132607 99.8104068 99.7395499  
100.213782 100.528143 100.403761 99.974221  
99.8233349 99.8871718 100.433389 99.2680476  
100.332042 100.347616 100.132592 100.441403  
99.8576181 99.8198968 100.242668 99.6054741  
100.079766 100.176555 99.957568 100.292979  
99.7305278 99.716449 100.048023 99.4570497  
100.031112 100.164047 100.483424 100.297145  
99.8479218 99.7336903 100.550137 99.4919186  
100.184867 100.097279 99.8700562 100.03609  
99.8401302 99.8371382 100.267784 99.5613479  
99.9104281 99.8924118 100.426522 100.012484  
99.842208 99.6610064 100.26798 99.5047245  
100.24062 100.244675 99.8294397 100.274619  
100.242193 99.8383436 100.238794 99.3171899

|            |            |            |            |
|------------|------------|------------|------------|
| 100.352253 | 100.138141 | 99.8634636 | 99.6032476 |
| 100.260971 | 100.034202 | 100.025132 | 99.249565  |
| 100.540555 | 100.108009 | 100.421653 | 99.5804493 |
| 100.370161 | 99.8889587 | 100.308053 | 99.5590373 |
| 100.888818 | 100.476026 | 100.020031 | 100.068457 |
| 100.70834  | 100.666975 | 99.8915202 | 100.296441 |
| 100.924287 | 100.715051 | 100.257041 | 100.14286  |
| 100.954367 | 100.617884 | 99.7637939 | 99.9324374 |
| 101.158491 | 100.713358 | 100.186801 | 100.126686 |
| 100.642617 | 100.1571   | 99.859932  | 100.084324 |
| 100.536903 | 100.342802 | 99.8750394 | 99.9376749 |
| 100.167428 | 99.9448215 | 100.045733 | 99.8296908 |
| 99.4575142 | 99.095199  | 100.41557  | 99.4957257 |
| 99.7659608 | 99.6504415 | 100.464032 | 99.5425547 |
| 100.165516 | 100.113426 | 100.067512 | 99.8723607 |
| 100.32878  | 100.160994 | 100.200731 | 99.9328995 |
| 99.7370983 | 99.6529807 | 100.037885 | 99.7948771 |
| 100.232282 | 99.8244626 | 99.6021251 | 100.17752  |
| 99.8626329 | 99.8610273 | 99.9829494 | 99.8024252 |
| 99.5733121 | 99.5456564 | 100.089878 | 100.030255 |
| 99.917576  | 99.7900985 | 99.804996  | 100.037495 |
| 100.017552 | 100.292864 | 100.363774 | 99.9007046 |
| 99.4323029 | 99.3029071 | 100.524854 | 99.3347508 |
| 99.8313362 | 99.6738023 | 100.403602 | 99.9358264 |
| 99.9434828 | 99.9754614 | 100.02631  | 99.6664052 |
| 100.00625  | 99.989681  | 99.8968176 | 99.8660449 |
| 100.131785 | 100.187232 | 100.269598 | 99.9389072 |
| 99.9410486 | 99.9255235 | 99.891324  | 100.09372  |
| 100.09788  | 100.081601 | 99.9752976 | 100.246069 |
| 100.000686 | 99.7173076 | 99.6339095 | 99.9613975 |
| 99.8734129 | 99.558691  | 99.7422119 | 99.7498965 |
| 99.9123599 | 99.8171835 | 100.258807 | 99.5488705 |
| 99.8137752 | 99.8542561 | 99.7416233 | 99.9159548 |
| 99.537147  | 99.6641532 | 99.806958  | 99.7927205 |
| 99.756224  | 99.9443137 | 100.233104 | 99.4813997 |
| 100.163081 | 100.164887 | 99.7530029 | 100.274567 |
| 100.128307 | 100.357698 | 100.461089 | 100.296749 |
| 99.7551808 | 99.9913739 | 99.6031061 | 100.348353 |
| 99.8266417 | 100.062811 | 99.5683787 | 100.291203 |
| 99.8398558 | 100.153376 | 100.298047 | 99.984812  |
| 99.3917911 | 99.364864  | 100.381432 | 99.378653  |
| 99.5117618 | 99.663984  | 100.757155 | 99.7203203 |
| 99.7461395 | 99.7509945 | 99.8440398 | 99.9304349 |
| 100.067626 | 99.985449  | 99.9725508 | 99.8410899 |
| 99.7021503 | 99.8176913 | 99.9203616 | 99.7680736 |
| 99.7483999 | 99.9219686 | 99.8463942 | 100.044273 |

|            |            |            |            |
|------------|------------|------------|------------|
| 99.910969  | 100.213132 | 100.267047 | 100.077854 |
| 99.6515539 | 99.4632164 | 100.183073 | 99.7828617 |
| 99.9669553 | 99.8789711 | 100.142264 | 100.080781 |
| 100.319913 | 100.157947 | 99.8850456 | 99.719242  |
| 100.316088 | 100.154392 | 99.9543042 | 99.6756478 |
| 100.113181 | 100.023199 | 99.9278172 | 99.826764  |
| 100.146911 | 100.190787 | 100.21525  | 100.022861 |
| 100.287225 | 100.367517 | 100.043575 | 100.442628 |
| 99.838291  | 99.9991608 | 100.391045 | 99.719242  |
| 100.249321 | 100.253252 | 100.210541 | 99.963246  |
| 100.261318 | 100.132893 | 100.103416 | 100.058907 |
| 100.024159 | 100.005763 | 99.9062352 | 99.8463274 |
| 100.01703  | 100.037757 | 100.003354 | 100.289817 |
| 99.9100996 | 99.6604291 | 99.97569   | 100.440163 |
| 100.384245 | 100.22786  | 100.038278 | 100.361293 |
| 99.9899063 | 100.04876  | 100.323553 | 100.134542 |
| 99.570704  | 99.3098476 | 99.955089  | 99.7817834 |
| 100.089186 | 100.181307 | 99.894267  | 100.378392 |
| 99.87463   | 99.8635665 | 99.8872038 | 100.15657  |
| 99.9057528 | 100.004409 | 99.6929657 | 100.087867 |
| 99.9815605 | 100.177752 | 100.107929 | 100.064144 |
| 100.346689 | 100.375473 | 99.7204337 | 100.310613 |
| 99.6458161 | 99.7992397 | 100.188371 | 100.166429 |
| 100.2295   | 100.283723 | 99.7741925 | 100.35051  |
| 99.8815848 | 99.8031331 | 99.7271045 | 100.251306 |
| 99.7035412 | 99.7135834 | 99.7480979 | 100.194002 |
| 100.246018 | 100.150498 | 99.9780444 | 100.185992 |
| 99.8728913 | 99.9233228 | 100.078891 | 100.124221 |
| 100.289833 | 100.424226 | 100.059664 | 100.257468 |
| 100.216634 | 100.267979 | 99.817749  | 100.212642 |
| 99.5564466 | 99.4606772 | 99.8036225 | 99.7364948 |
| 99.8448981 | 99.920445  | 100.080265 | 99.8862245 |
| 99.8448981 | 99.7887442 | 99.9274248 | 99.891616  |
| 99.9563492 | 99.7662298 | 99.4002353 | 100.178444 |
| 100.131785 | 100.168611 | 100.016107 | 99.9922061 |
| 100.140652 | 99.9566712 | 99.806958  | 99.9952869 |
| 99.8805416 | 99.9807091 | 100.089094 | 99.9789584 |
| 100.223762 | 100.399172 | 99.835407  | 100.114362 |
| 100.316262 | 100.407636 | 99.8414892 | 100.465118 |
| 99.8789767 | 100.066027 | 100.374761 | 100.000678 |
| 100.115789 | 100.262224 | 99.8930898 | 100.258546 |
| 99.8593294 | 100.123413 | 99.6968897 | 100.252077 |
| 100.029897 | 100.242926 | 100.176991 | 99.9231948 |
| 100.075451 | 100.371072 | 100.254098 | 99.9538494 |
| 99.9022754 | 100.076522 | 100.006493 | 99.9518468 |
| 100.217851 | 100.381229 | 99.8371728 | 100.264554 |

99.9881675 100.211101 99.6176249 100.315696  
99.4674248 99.4730347 100.018265 100.032411  
99.6955432 99.9077489 99.9105516 100.032719  
99.7633527 99.9265392 99.5624927 100.037187  
99.7070186 99.777741 99.7465283 99.7032215  
100.017552 100.244449 100.263712 99.9264297  
99.8349875 99.92163 99.9209502 99.7973417  
99.6446798 99.4547365 100.05263 99.9589829  
99.435762 99.2810321 100.436869 99.8761134  
99.0893811 99.2891849 100.418544 99.8924692  
99.1486239 99.2469235 100.264425 99.920975  
99.4268508 99.8269364 99.9426827 99.8212824  
98.9286497 99.2414329 100.397133 99.7254841  
99.3638125 99.5766956 100.370514 100.022848  
99.1674364 99.5222882 99.6898029 99.7918419  
99.3123256 99.3662205 100.271947 99.8644306  
99.1250258 99.3851882 99.9781746 99.9768964  
99.5648092 99.4525735 100.043565 99.843869  
98.9076919 99.1793718 100.239349 99.8095997  
99.2857571 98.7248121 100.2081 99.7923093  
99.4590301 99.1141495 99.6899958 99.7338956  
98.8938301 99.0707234 100.370322 99.4114523  
99.5009457 99.3041594 100.033727 99.9985484  
99.1230455 99.6021523 99.6471741 99.8677018  
99.3057248 99.4545701 100.298759 99.9957445  
99.1557199 99.2337792 99.8898306 99.9206635  
99.488569 99.3630592 100.392118 99.8499441  
99.0312933 99.0396097 100.333287 99.7572611  
99.6115104 99.1609032 99.6764935 99.8577325  
99.2141376 99.1785399 100.214466 99.6764166  
99.6984769 99.0710562 100.178781 100.036712  
99.4738821 99.4158028 99.6178547 99.8237747  
99.2692549 98.9454366 100.172994 99.9178596  
99.4997905 99.4860166 99.5565154 100.131731  
99.5681096 99.3826924 100.461559 99.722836  
99.8141573 99.2590695 100.571314 99.7290668  
99.6331282 99.3920099 100.021768 99.9410693  
100.426223 99.9247699 99.6853664 100.019266  
100.041887 100.086661 99.1826931 99.9560232  
100.010203 100.271679 100.169715 99.9061769  
99.9532707 100.536229 100.116092 99.8887307  
99.7083782 100.391476 100.041829 100.171453  
100.354604 100.370345 99.8321563 100.150891  
100.080668 100.373673 100.043179 99.8184786  
100.203114 100.038743 100.126315 99.8893538  
100.572928 100.410942 99.7563502 100.398098

|            |            |            |            |
|------------|------------|------------|------------|
| 100.275558 | 100.812259 | 99.5140794 | 100.091231 |
| 100.483156 | 100.789299 | 100.219095 | 100.139676 |
| 99.9323129 | 100.522586 | 100.325764 | 99.9761175 |
| 100.318794 | 100.396301 | 100.381509 | 100.227686 |
| 100.308068 | 100.440559 | 100.044143 | 100.486886 |
| 100.255261 | 100.636891 | 99.726838  | 100.275663 |
| 100.407246 | 100.381659 | 99.9855045 | 99.9211308 |
| 99.9829747 | 100.382824 | 100.438798 | 99.8578883 |
| 100.215986 | 100.122267 | 100.107219 | 100.210862 |
| 100.119778 | 100.127758 | 99.8674553 | 100.201516 |
| 100.17605  | 100.229418 | 99.8373644 | 100.218028 |
| 100.433814 | 100.335571 | 99.5804339 | 100.117712 |
| 99.8555777 | 100.388481 | 100.389418 | 99.7832746 |
| 100.17638  | 100.055714 | 100.209451 | 100.273638 |
| 100.102451 | 100.196474 | 99.8778714 | 100.26803  |
| 100.349488 | 100.428413 | 99.7661877 | 100.241393 |
| 100.240244 | 100.441723 | 100.156213 | 99.9655252 |
| 99.6666277 | 100.117608 | 100.3302   | 99.6880993 |
| 100.108721 | 99.993819  | 100.13866  | 100.300274 |
| 100.0574   | 100.155045 | 99.8311919 | 100.160705 |
| 100.106741 | 100.285489 | 99.514851  | 100.116466 |
| 100.292391 | 100.41427  | 99.6795797 | 100.117712 |
| 99.5991337 | 100.023269 | 100.420087 | 99.7553918 |
| 100.015814 | 99.9444031 | 100.064011 | 100.16382  |
| 99.947825  | 99.9770143 | 99.7017622 | 100.29638  |
| 100.185622 | 100.175676 | 99.4793591 | 100.061324 |
| 100.227207 | 100.556195 | 100.201156 | 99.9804791 |
| 100.236448 | 100.218437 | 99.9600429 | 100.009452 |
| 99.902444  | 99.5557313 | 100.18206  | 100.200737 |
| 100.693889 | 100.236406 | 99.5160084 | 100.131108 |
| 100.122583 | 100.383156 | 100.31149  | 99.8072632 |
| 100.545699 | 100.208787 | 100.267125 | 100.200737 |
| 100.02324  | 100.022603 | 99.9039117 | 100.094503 |
| 100.242389 | 100.057045 | 99.68961   | 100.068956 |
| 100.150967 | 100.145394 | 99.6953968 | 99.7634919 |
| 99.6712483 | 99.7810145 | 100.029291 | 99.5891856 |
| 100.613688 | 99.885337  | 99.8325421 | 99.9969907 |
| 100.180836 | 100.365853 | 99.4110758 | 99.7733054 |
| 100.105256 | 99.9530551 | 100.333865 | 100.071916 |
| 100.334636 | 100.275506 | 99.8757496 | 100.271301 |
| 100.113507 | 100.317601 | 100.31014  | 99.7452668 |
| 100.305592 | 99.935252  | 100.351032 | 99.9434059 |
| 100.107071 | 99.9820058 | 99.7467057 | 99.8641191 |
| 100.260541 | 100.068359 | 99.5578656 | 99.8343671 |
| 100.104761 | 100.158539 | 100.186497 | 99.9948099 |
| 100.351799 | 100.605944 | 99.8460444 | 100.180487 |

|            |            |            |            |
|------------|------------|------------|------------|
| 100.652799 | 100.454036 | 100.158527 | 100.153539 |
| 100.240079 | 100.148556 | 100.328078 | 100.208526 |
| 100.532003 | 100.050223 | 100.118406 | 100.256191 |
| 100.549495 | 100.474501 | 99.8915667 | 100.004779 |
| 100.264997 | 100.366851 | 100.229511 | 100.012723 |
| 100.824421 | 100.475998 | 99.7924208 | 100.470375 |
| 100.604777 | 100.629238 | 99.6863309 | 100.118491 |
| 100.341567 | 100.095313 | 100.526949 | 99.857421  |
| 100.239089 | 100.241398 | 100.027362 | 100.034375 |
| 100.356584 | 100.221764 | 99.5428202 | 100.0445   |
| 100.433484 | 100.433903 | 100.180903 | 99.954154  |
| 100.107896 | 100.136742 | 100.095259 | 99.9030615 |
| 100.536788 | 100.061703 | 99.9573424 | 100.036712 |
| 100.304602 | 100.500956 | 99.4131976 | 99.8954288 |
| 100.28546  | 100.13641  | 100.374565 | 99.9387328 |
| 100.418381 | 100.150506 | 100.185149 | 100.183754 |
| 100.626214 | 100.188279 | 99.4200732 | 100.087044 |
| 100.649215 | 100.374487 | 100.333302 | 99.9962614 |
| 100.408287 | 100.108072 | 100.372656 | 100.172679 |
| 100.921416 | 100.167645 | 99.7977882 | 100.35908  |
| 100.562838 | 100.34703  | 99.762486  | 100.104514 |
| 100.421194 | 99.9639652 | 100.445961 | 100.056939 |
| 100.758261 | 100.137027 | 100.066703 | 100.330223 |
| 100.427813 | 100.091598 | 99.8269174 | 100.167532 |
| 100.816838 | 100.196933 | 99.6328514 | 100.162073 |
| 100.57591  | 100.56785  | 100.042203 | 99.8959636 |
| 100.508563 | 100.32157  | 100.300315 | 99.9964174 |
| 100.73526  | 100.215237 | 100.342369 | 100.215419 |
| 101.058923 | 100.501288 | 99.6733622 | 100.416483 |
| 100.783412 | 100.857894 | 100.584662 | 100.028238 |
| 100.99985  | 100.515099 | 100.604725 | 100.258159 |
| 100.804593 | 100.382641 | 100.153705 | 100.211052 |
| 100.766534 | 99.8727751 | 99.6617877 | 100.123544 |
| 100.606688 | 100.216568 | 99.8369487 | 99.7671208 |
| 100.292457 | 99.9493215 | 100.492645 | 99.8614911 |
| 100.798801 | 100.195102 | 100.044325 | 100.300586 |
| 100.529413 | 100.472999 | 99.8226734 | 100.123232 |
| 100.020586 | 99.6123509 | 100.480299 | 99.5599739 |
| 99.7841266 | 99.2171384 | 100.169716 | 99.9232609 |
| 100.00437  | 99.5597668 | 99.7237113 | 100.10779  |
| 100.043918 | 100.214572 | 100.30726  | 99.8594634 |
| 99.6625046 | 99.6213368 | 100.283146 | 100.124168 |
| 100.113085 | 99.4902094 | 99.9449775 | 100.331003 |
| 99.944469  | 99.9792745 | 100.39484  | 99.9755155 |
| 99.6692889 | 99.4512706 | 100.680538 | 100.071758 |
| 99.7215781 | 99.6311547 | 100.330023 | 100.195765 |

99.7136355 99.6101876 100.06516 100.070198  
99.6287483 99.6651014 100.665298 99.7733601  
99.6773971 99.6438015 100.389439 100.100303  
100.392898 100.01605 99.8367558 100.177671  
99.538897 99.8399933 100.864766 99.7140862  
99.917828 99.5967088 100.41606 99.9934537  
99.9092234 100.022873 99.5904115 100.00718  
99.6921241 99.6860684 100.792232 99.8577475  
99.7573201 99.7837483 100.204825 100.292631  
99.769565 100.206418 99.6698898 100.02855  
99.8577616 99.8401597 100.92341 99.8719421  
99.7455716 99.7328283 100.1919 100.13072  
99.870503 99.8664517 99.8126422 100.085796  
99.7700614 99.9306842 100.489944 99.8288905  
99.7142973 99.8301754 100.144638 100.009832  
100.262837 99.8250168 99.5668766 100.207464  
100.079991 99.6514561 100.281796 99.9128099  
99.8660352 99.9173717 100.247844 99.6583998  
100.071055 99.9281881 100.224502 100.094219  
100.078667 100.4938 99.4320335 100.020751  
99.4995146 99.9038929 100.434194 99.67665  
100.089919 99.9338459 100.184956 100.128848  
99.8817551 100.169809 99.45634 99.9848746  
99.8440274 99.7576227 100.548588 99.774452  
99.8163936 99.8171958 100.036416 100.143822  
99.7591403 100.138358 99.6525281 100.045396  
99.8299623 99.951152 100.163157 99.7767918  
99.6118701 99.9867627 99.8861404 99.9594492  
100.280874 100.311586 99.3490828 100.154741  
99.4869387 100.076622 100.268485 99.8685104  
99.9896429 99.7840811 99.7586278 100.219319  
99.9464547 100.156496 99.3201466 99.9934537  
99.8036523 99.9028945 100.361853 99.8646108  
99.8458476 100.059981 100.018861 100.085328  
99.8276457 100.047168 99.4526748 100.117929  
100.225275 100.322735 100.017704 99.882081  
99.5989633 100.151005 100.236077 99.9274724  
100.125495 99.8672838 99.9606031 100.207932  
100.002715 100.188612 99.17778 99.9234168  
100.050537 99.8950734 100.296264 99.8652348  
99.5896969 99.6754185 100.011917 100.204968  
99.9376846 99.7942318 99.3556417 100.083613  
99.8365812 100.158826 99.8577828 99.7643131  
99.6136903 100.087105 100.04529 99.9745796  
100.196152 100.3452 99.688602 100.265958  
100.028529 100.511272 99.5236651 99.9260686

|            |            |            |            |
|------------|------------|------------|------------|
| 99.8208614 | 99.8612932 | 100.063616 | 100.091568 |
| 99.8590854 | 99.9731175 | 99.7084716 | 100.113094 |
| 99.8534594 | 100.086939 | 99.5985137 | 99.9263805 |
| 99.8900287 | 100.188113 | 99.9960983 | 99.7338962 |
| 99.6912967 | 99.8822602 | 99.9960983 | 99.8499483 |
| 100.139561 | 100.149341 | 99.287545  | 100.004997 |
| 99.6560512 | 100.169143 | 99.9681265 | 99.6945882 |
| 99.9423179 | 99.8536385 | 99.891156  | 100.039937 |
| 99.7978607 | 100.001074 | 99.6725906 | 100.067858 |
| 99.8574307 | 100.084276 | 99.5524085 | 99.9560175 |
| 99.5372422 | 100.000907 | 100.042782 | 99.7268769 |
| 99.5721568 | 99.8363324 | 100.030822 | 99.8759977 |
| 100.299407 | 100.329225 | 99.1760438 | 100.093284 |
| 99.6649867 | 100.233375 | 99.9374541 | 99.6811735 |
| 99.7854503 | 99.9306842 | 100.079821 | 99.9684962 |
| 99.7897526 | 99.9969135 | 99.6955467 | 100.177515 |
| 100.050537 | 100.092929 | 99.9200923 | 99.91203   |
| 99.5609047 | 99.8576322 | 99.732778  | 99.9714599 |
| 99.7629461 | 99.9060562 | 99.6316939 | 100.161917 |
| 100.159748 | 100.363671 | 99.4248959 | 99.7772597 |
| 99.5675236 | 100.094261 | 100.070947 | 99.2193046 |
| 99.8595818 | 99.7925678 | 99.8020322 | 100.237413 |
| 99.7875507 | 99.8452959 | 99.2033112 | 99.5312678 |
| 99.7575031 | 99.9221976 | 100.21331  | 99.6033597 |
| 100.214691 | 100.344325 | 99.5606893 | 100.02143  |
| 100.296368 | 100.578027 | 99.5361823 | 99.8532677 |
| 100.208549 | 100.45302  | 99.8204253 | 99.7998605 |
| 100.175347 | 100.376118 | 99.8391433 | 99.9197541 |
| 100.497238 | 100.441201 | 99.2374667 | 99.8484408 |
| 99.7030522 | 100.004259 | 99.9728706 | 99.5474613 |
| 100.219174 | 99.9464999 | 99.7308878 | 99.9250481 |
| 99.9163735 | 100.083658 | 99.2957432 | 99.7832    |
| 99.8818437 | 100.002595 | 100.037129 | 99.6282726 |
| 99.9321443 | 100.048703 | 99.6789792 | 99.7998605 |
| 99.9185316 | 100.057358 | 99.3667557 | 99.7542387 |
| 100.284581 | 100.450856 | 99.7472901 | 99.5698829 |
| 99.887488  | 100.022902 | 99.6743479 | 99.7495675 |
| 100.486282 | 100.401918 | 99.278569  | 99.9072976 |
| 99.4998575 | 99.5438476 | 100.20096  | 99.5074448 |
| 99.6306724 | 99.8571141 | 100.26271  | 100.17698  |
| 100.004524 | 100.426886 | 101.367456 | 100.973572 |
| 98.5924534 | 99.4346537 | 100.673926 | 99.6553654 |
| 98.2127913 | 98.9917195 | 100.595967 | 99.2168976 |
| 98.8263598 | 100.342161 | 101.04076  | 99.8076458 |
| 98.4457017 | 99.8499566 | 98.9015081 | 99.9736283 |
| 98.1810836 | 98.9805671 | 100.130333 | 99.858406  |



99.3378329 99.7437589 100.249974 99.9851506  
99.9691643 99.7718896 99.4400839 100.239574  
99.1842748 98.8730378 100.038673 99.8640114  
98.6943828 98.69643 100.210222 99.5938616  
99.5156283 99.8055133 100.824635 99.8012619  
99.3560938 99.2387373 100.090003 99.9614833  
99.3957699 99.3241282 100.478449 99.9115017  
99.8579384 99.7579075 100.237431 99.9868633  
99.7575031 99.8531192 99.9796245 100.008506  
100.201577 100.544403 100.483852 100.055218  
99.698072 99.8153341 100.06646 99.9266051  
100.119402 99.9441696 99.8663519 100.247048  
100.016975 100.205669 99.3877893 100.222446  
99.8463178 100.115284 100.305742 100.252653  
100.145964 100.378615 99.7517284 100.458341  
100.055157 100.091148 100.079968 100.242844  
99.8974485 99.7474209 100.532287 100.231477  
100.152106 99.9438367 99.5633909 100.288777  
99.8977805 99.9376779 100.515885 99.9758082  
99.9854332 99.9686383 100.158121 100.15051  
100.293213 100.074503 99.525762 100.265888  
99.9934016 99.8176645 100.412839 99.8165211  
99.96435 99.8236568 99.958205 100.115944  
100.464535 100.250611 99.4385401 100.244712  
100.424692 100.586516 100.37193 100.229142  
100.23511 99.6370618 100.060478 100.232567  
100.303838 99.9554884 99.8667378 100.191772  
100.556005 100.512444 99.5975464 99.9974513  
99.9967218 99.8178309 100.27834 100.045409  
100.299688 100.091148 99.9199972 100.359779  
100.398629 100.110124 99.5479534 100.091186  
99.773772 99.8724279 100.276218 99.9502724  
100.352811 100.130765 99.8538089 100.282393  
100.359949 99.9816217 100.02613 99.7634254  
100.448598 100.264927 100.104475 100.173866  
100.410748 100.179203 99.7254847 100.165614  
100.110438 100.010085 100.267341 100.011621  
100.310312 99.9113781 99.8943323 100.259504  
100.25802 99.980623 100.340862 99.8574717  
100.282257 99.7142965 100.16526 100.091031  
100.417222 99.9343488 99.7146784 100.015046  
100.225814 99.8852448 100.486361 99.7819544  
100.275451 99.8304814 100.230677 100.183987  
100.432495 100.10047 99.4655557 99.990756  
100.127537 100.016577 99.791287 99.9171071  
100.08537 99.6383935 100.177803 100.101151

|            |            |            |            |
|------------|------------|------------|------------|
| 100.713216 | 100.45535  | 99.75443   | 100.277255 |
| 100.579745 | 100.215323 | 99.5427433 | 99.9789223 |
| 100.054825 | 99.9496625 | 100.117211 | 99.7819544 |
| 100.221498 | 100.197513 | 99.8401081 | 99.8745994 |
| 100.178999 | 100.278909 | 99.4568722 | 99.9518295 |
| 100.357625 | 100.258102 | 100.204433 | 99.8501535 |
| 100.017141 | 99.7695593 | 100.398753 | 99.9955829 |
| 100.376052 | 100.040713 | 100.256149 | 100.058799 |
| 100.289561 | 100.173876 | 99.7409222 | 99.865257  |
| 100.006848 | 99.9301874 | 100.188803 | 99.679967  |
| 100.313301 | 100.19152  | 100.005096 | 100.210768 |
| 100.357791 | 100.451355 | 99.4344878 | 99.9364146 |
| 100.10911  | 100.181034 | 100.076881 | 99.8074901 |
| 100.600164 | 100.5469   | 99.7872347 | 100.319763 |
| 100.278439 | 99.9852837 | 100.089231 | 99.8454824 |
| 100.179995 | 100.056526 | 100.388139 | 100.051014 |
| 100.486614 | 100.541407 | 99.7511495 | 100.310732 |
| 99.9680022 | 100.14225  | 100.311917 | 100.186011 |
| 100.252541 | 100.499793 | 99.6928729 | 100.254989 |
| 99.9982158 | 100.268256 | 100.311917 | 99.902315  |
| 100.136667 | 100.136091 | 100.175295 | 100.154091 |
| 100.440961 | 100.374453 | 99.5990901 | 100.062536 |
| 99.7251314 | 99.549507  | 100.302075 | 99.6094322 |
| 100.129861 | 100.113953 | 99.741694  | 99.9666216 |
| 100.199751 | 100.341662 | 100.071092 | 100.075927 |
| 100.058311 | 100.144414 | 100.078425 | 100.121082 |
| 100.221498 | 100.301713 | 99.7268355 | 100.093055 |
| 99.5338893 | 99.7803788 | 100.311145 | 99.7480105 |
| 100.18398  | 99.9689712 | 99.9284878 | 100.038558 |
| 99.9082391 | 100.011251 | 99.4308214 | 99.8992009 |
| 100.116082 | 100.372622 | 100.332757 | 99.8694611 |
| 99.5156079 | 100.244506 | 99.8236387 | 100.157839 |
| 99.2296155 | 100.175536 | 99.5994454 | 99.9682942 |
| 99.534091  | 100.447086 | 100.228266 | 99.8275386 |
| 99.6418538 | 100.32797  | 100.203591 | 99.9117114 |
| 99.3240112 | 99.9576299 | 99.8970846 | 100.061352 |
| 99.787738  | 100.821924 | 99.3280231 | 100.026748 |
| 99.4288035 | 100.638837 | 100.084459 | 99.9315076 |
| 99.9157992 | 100.549375 | 100.016989 | 100.210369 |
| 99.9623369 | 100.652831 | 99.6861926 | 100.186364 |
| 99.2751631 | 99.857673  | 100.503929 | 99.8309679 |
| 99.5024057 | 99.922645  | 100.25429  | 99.8925387 |
| 99.2193838 | 99.6884125 | 99.9834463 | 99.9263637 |
| 99.238527  | 99.7480535 | 100.059398 | 99.9728146 |
| 99.3088287 | 99.7345593 | 99.5173248 | 100.114973 |
| 99.1863784 | 99.7362253 | 100.432026 | 99.8256681 |

|            |            |            |            |
|------------|------------|------------|------------|
| 99.2101423 | 99.671753  | 100.056699 | 100.256041 |
| 99.5854145 | 100.086574 | 100.139013 | 99.999937  |
| 98.9914811 | 99.336564  | 100.201471 | 100.188235 |
| 99.7322888 | 100.006609 | 99.6649877 | 100.14116  |
| 99.2068418 | 99.1901271 | 100.358194 | 99.9263637 |
| 99.9539205 | 100.046425 | 99.4695174 | 100.056208 |
| 99.3788002 | 99.4461835 | 100.279736 | 100.062131 |
| 99.9014418 | 99.8371818 | 99.5984816 | 100.285345 |
| 99.3188953 | 99.2332751 | 100.451303 | 99.8875507 |
| 99.824209  | 99.869168  | 99.561855  | 100.201796 |
| 99.7253576 | 99.9123161 | 100.10682  | 99.8537257 |
| 99.9380779 | 100.047924 | 99.4490837 | 100.29875  |
| 99.8623303 | 99.8558404 | 100.259881 | 100.060261 |
| 100.166476 | 99.9609618 | 99.7910603 | 100.062755 |
| 99.7808068 | 99.704239  | 100.219206 | 99.8445291 |
| 99.9285063 | 99.7730428 | 99.8635424 | 100.10188  |
| 100.032804 | 99.9827858 | 99.9020967 | 99.8905123 |
| 99.999303  | 100.162375 | 99.97188   | 100.115285 |
| 100.208888 | 100.298483 | 99.8222893 | 99.9782703 |
| 99.9171194 | 99.849843  | 100.045519 | 100.108115 |
| 100.246349 | 100.190863 | 99.642819  | 100.105465 |
| 99.6885566 | 99.7405567 | 100.130531 | 100.02098  |
| 100.004584 | 99.9206459 | 99.5959755 | 99.887239  |
| 99.697303  | 99.6009502 | 100.163688 | 99.8513876 |
| 100.297177 | 100.189697 | 99.507879  | 99.9954166 |
| 99.9529303 | 99.7169003 | 100.340074 | 99.8075865 |
| 100.350316 | 100.31381  | 99.4569873 | 99.9695413 |
| 99.9154691 | 99.8280191 | 100.160025 | 99.6344088 |
| 100.398339 | 100.323306 | 99.4693247 | 99.9241815 |
| 100.122248 | 100.085408 | 100.160218 | 99.8499847 |
| 100.386457 | 100.403105 | 99.5443128 | 100.01911  |
| 100.211198 | 100.370619 | 100.313857 | 100.069925 |
| 100.589111 | 100.342964 | 99.7393975 | 99.9539537 |
| 99.9601915 | 99.8115262 | 100.408507 | 99.9157642 |
| 100.227041 | 99.9842851 | 99.6971806 | 100.122923 |
| 99.9245456 | 99.8571732 | 100.140748 | 99.9450688 |
| 100.122578 | 99.9502998 | 99.9470124 | 99.9675149 |
| 100.016961 | 100.116228 | 100.042242 | 99.9268314 |
| 100.064819 | 99.9088176 | 99.8747231 | 99.8068072 |
| 99.612644  | 98.9324047 | 100.320796 | 100.097047 |
| 100.235787 | 99.6224409 | 99.5477827 | 100.117311 |
| 99.6997784 | 99.456679  | 100.149423 | 100.098606 |
| 100.444052 | 100.172871 | 99.5169392 | 100.160489 |
| 100.007884 | 99.7552171 | 100.376122 | 99.8878625 |
| 100.496695 | 100.271828 | 99.7766024 | 100.075225 |
| 100.013825 | 99.7032395 | 100.230965 | 99.902203  |

|            |            |            |            |
|------------|------------|------------|------------|
| 100.296187 | 100.072914 | 99.8510122 | 99.9436659 |
| 99.9618418 | 99.7142347 | 100.216507 | 99.7443011 |
| 100.217469 | 100.021103 | 99.8560243 | 100.027839 |
| 100.012835 | 100.043426 | 100.2167   | 99.9190376 |
| 100.489269 | 100.487735 | 99.6925541 | 100.066028 |
| 100.125879 | 100.173704 | 100.165808 | 100.014122 |
| 100.415667 | 100.452917 | 99.7284096 | 100.117779 |
| 100.207072 | 99.9649601 | 100.466532 | 99.8453084 |
| 100.307574 | 100.409935 | 99.7989639 | 100.023162 |
| 100.037259 | 99.9961134 | 100.367254 | 100.08676  |
| 100.467981 | 100.580695 | 99.6144816 | 100.04405  |
| 100.077691 | 99.8933243 | 100.171206 | 99.9815437 |
| 100.485804 | 100.351794 | 99.7675422 | 99.8384499 |
| 100.216149 | 100.124725 | 99.9558799 | 99.926052  |
| 100.31203  | 100.596355 | 100.240603 | 100.036879 |
| 100.179018 | 100.003277 | 99.9998318 | 100.022851 |
| 100.234137 | 100.037596 | 100.301134 | 99.8845891 |
| 100.095679 | 99.7318938 | 99.7839278 | 100.068522 |
| 100.109706 | 99.8878267 | 100.293616 | 100.092527 |
| 100.141722 | 99.8371818 | 99.7259035 | 100.222683 |
| 100.349491 | 100.05892  | 100.271832 | 100.104374 |
| 100.336289 | 100.016271 | 99.8269158 | 100.085045 |
| 100.092213 | 99.9376386 | 100.228266 | 100.030177 |
| 100.16268  | 99.8201891 | 100.033567 | 99.902203  |
| 99.9382429 | 99.9586295 | 100.295929 | 99.7743851 |
| 99.98115   | 99.752385  | 99.6460961 | 100.138666 |
| 99.9580462 | 100.222016 | 100.015061 | 99.7868551 |
| 100.124229 | 99.9839519 | 99.9464341 | 100.032047 |
| 100.163175 | 100.225015 | 100.346821 | 99.7715793 |
| 100.140236 | 100.020603 | 99.8473496 | 100.134925 |
| 100.056898 | 100.002277 | 100.559448 | 99.9519273 |
| 100.211033 | 100.034763 | 99.8417592 | 100.100009 |
| 100.225225 | 100.252836 | 100.22364  | 99.9642415 |
| 100.317146 | 100.203524 | 99.8348194 | 100.234218 |
| 100.214334 | 100.227014 | 100.361664 | 99.8560638 |
| 100.273909 | 100.246339 | 100.059591 | 100.056052 |
| 100.10426  | 100.351794 | 100.308652 | 99.9050088 |
| 100.357247 | 100.448752 | 99.889181  | 100.019733 |
| 100.215654 | 100.485236 | 100.244266 | 99.9230903 |
| 99.4185238 | 100.120955 | 100.474606 | 101.193032 |
| 99.5386885 | 100.08681  | 100.70119  | 101.348274 |
| 99.5351885 | 99.8150739 | 100.892881 | 100.932042 |
| 99.6346869 | 99.9410621 | 100.574589 | 101.700652 |
| 99.5615214 | 99.582383  | 101.06802  | 101.140158 |
| 99.5685213 | 99.6863983 | 100.41891  | 101.62396  |
| 99.7886843 | 99.6630028 | 100.543498 | 101.00772  |

|            |            |            |            |
|------------|------------|------------|------------|
| 99.5368552 | 99.3604414 | 100.69694  | 101.127657 |
| 99.7718513 | 99.888106  | 100.599194 | 101.209924 |
| 99.7396852 | 99.471096  | 100.808555 | 100.508377 |
| 99.9111823 | 99.9500726 | 100.673231 | 101.615514 |
| 99.4585231 | 99.3942701 | 100.369702 | 100.66514  |
| 99.5606881 | 99.5140933 | 100.287836 | 101.100967 |
| 99.504189  | 98.9488061 | 100.954839 | 100.675106 |
| 99.6210204 | 98.8251891 | 100.932248 | 100.783725 |
| 99.832517  | 98.8323026 | 100.431213 | 100.722912 |
| 99.9105157 | 99.3542763 | 100.257192 | 100.932042 |
| 99.5788545 | 98.9989168 | 100.703874 | 100.467497 |
| 99.2256936 | 98.9714113 | 100.252942 | 100.803828 |
| 99.4256903 | 98.8874718 | 100.264797 | 100.80028  |
| 99.3141922 | 98.5973986 | 100.038884 | 100.61007  |
| 99.6425201 | 99.1724866 | 99.87985   | 100.764637 |
| 99.4428567 | 98.7998966 | 100.280455 | 100.340972 |
| 99.3538582 | 98.9756794 | 100.212457 | 100.806699 |
| 99.3171921 | 99.2335047 | 100.346216 | 100.200933 |
| 99.4535232 | 99.2330305 | 100.018977 | 100.482701 |
| 99.4771895 | 99.1558884 | 100.147591 | 100.663113 |
| 99.6746862 | 99.0227866 | 100.320493 | 99.9076787 |
| 100.141512 | 99.6819722 | 99.9968328 | 100.440807 |
| 100.493006 | 99.8247167 | 99.8896918 | 100.568008 |
| 100.308842 | 100.00951  | 99.8400356 | 100.124748 |
| 100.05118  | 99.8174451 | 100.082054 | 100.476957 |
| 99.9706813 | 99.4733091 | 100.141775 | 99.9793031 |
| 99.8813495 | 99.442642  | 99.7876953 | 100.152789 |
| 100.144012 | 99.3340423 | 100.039108 | 100.458882 |
| 99.9455151 | 99.4179818 | 100.087646 | 99.6632438 |
| 99.9591815 | 99.5736887 | 99.8919285 | 100.771732 |
| 100.44284  | 100.605938 | 99.6637785 | 99.6291208 |
| 100.142845 | 99.8944291 | 99.812076  | 100.116977 |
| 100.069346 | 100.326773 | 99.8270623 | 99.8759207 |
| 99.9516816 | 100.021524 | 100.063041 | 100.420705 |
| 99.6808528 | 99.699835  | 99.7749457 | 99.8010868 |
| 99.5778545 | 100.094872 | 100.023227 | 99.5625643 |
| 99.8266837 | 100.164901 | 99.7753931 | 99.7968637 |
| 99.6640197 | 99.8961679 | 100.018082 | 99.5892545 |
| 99.8050174 | 99.9908567 | 100.072212 | 99.9189967 |
| 100.06368  | 99.8953775 | 99.8353384 | 99.6007414 |
| 100.306342 | 100.250421 | 99.947624  | 99.6720279 |
| 100.224177 | 99.9655642 | 100.058344 | 100.05059  |
| 99.9573482 | 100.073215 | 99.9395716 | 99.5304684 |
| 100.147178 | 100.206791 | 99.9037834 | 99.7039548 |
| 100.256677 | 100.053298 | 99.8212468 | 99.7335167 |
| 100.059013 | 100.033854 | 99.8422723 | 99.2786008 |

|            |            |            |            |
|------------|------------|------------|------------|
| 100.502839 | 100.192722 | 99.6695941 | 100.118835 |
| 99.948015  | 100.273184 | 99.7621961 | 99.2726884 |
| 99.9601815 | 100.433001 | 99.6514763 | 99.775917  |
| 100.074013 | 100.475208 | 99.6557261 | 99.818824  |
| 100.126679 | 100.382258 | 99.8632979 | 99.3280959 |
| 100.385841 | 100.402808 | 99.7190266 | 99.8985567 |
| 100.161512 | 100.608784 | 99.6825673 | 99.4541142 |
| 99.9323486 | 100.395853 | 99.9641761 | 99.5710105 |
| 99.9555149 | 100.31302  | 99.7465388 | 99.9357203 |
| 99.8846828 | 100.550611 | 99.9397953 | 99.1267369 |
| 100.285343 | 100.811756 | 99.7449731 | 99.6818255 |
| 100.105679 | 100.511724 | 99.7252895 | 99.7438211 |
| 100.301843 | 100.473785 | 99.8156548 | 99.5476988 |
| 100.326009 | 100.644668 | 99.5259937 | 100.088767 |
| 100.284176 | 100.986907 | 99.8111813 | 99.5169544 |
| 99.9823478 | 100.420039 | 99.9073622 | 99.6069916 |
| 100.122845 | 100.430946 | 99.6950932 | 99.9193346 |
| 99.9970142 | 100.537965 | 99.8221415 | 99.427424  |
| 100.020847 | 100.501133 | 99.5919783 | 99.9755867 |
| 100.014847 | 100.582069 | 99.6968826 | 99.3537725 |
| 100.064846 | 100.094872 | 99.7029219 | 99.7399359 |
| 100.097513 | 100.801797 | 99.6116618 | 99.4304646 |
| 99.9130156 | 100.520418 | 99.8212468 | 99.4086733 |
| 100.156012 | 100.481373 | 99.5913073 | 99.7406116 |
| 99.8750162 | 100.311755 | 99.7362497 | 99.5277656 |
| 99.8665164 | 100.278243 | 100.070199 | 99.8333516 |
| 100.03168  | 100.396643 | 99.6550551 | 99.5073257 |
| 99.9198488 | 100.417984 | 99.5843733 | 99.7178066 |
| 99.951515  | 100.368821 | 99.6959879 | 100.078969 |
| 99.5811878 | 100.358388 | 99.7729326 | 99.4466815 |
| 99.8796828 | 100.242517 | 99.6367136 | 99.9990673 |
| 99.9166822 | 99.9750489 | 100.031055 | 99.3547861 |
| 99.7561849 | 100.042232 | 99.7760641 | 99.2402547 |
| 100.047847 | 100.035119 | 99.924138  | 99.979472  |
| 100.004014 | 100.375935 | 100.336821 | 99.3302919 |
| 100.307342 | 100.202049 | 99.888126  | 99.8139252 |
| 100.312342 | 99.9674611 | 99.7644329 | 99.8826778 |
| 100.612671 | 100.448967 | 100.336374 | 99.3735368 |
| 100.935832 | 100.592186 | 99.7977607 | 100.079138 |
| 100.648003 | 100.702524 | 99.9514265 | 99.6189853 |
| 100.389674 | 100.495758 | 100.397661 | 99.5309752 |
| 100.756668 | 100.506349 | 100.140209 | 100.227117 |
| 100.390841 | 100.535752 | 100.201721 | 99.2686342 |
| 100.370508 | 100.521999 | 100.205747 | 99.3931321 |
| 100.726669 | 100.532748 | 100.062817 | 99.9679851 |
| 100.493339 | 100.40597  | 100.273073 | 99.7740588 |

|            |            |            |            |
|------------|------------|------------|------------|
| 101.009164 | 100.4594   | 99.8872313 | 100.456348 |
| 100.441263 | 100.933423 | 99.8533493 | 99.2052253 |
| 100.499247 | 100.733667 | 99.8645004 | 99.7099324 |
| 100.424601 | 100.62975  | 99.664672  | 98.9615561 |
| 100.374615 | 99.6767547 | 99.6147148 | 100.595236 |
| 100.538903 | 100.671095 | 100.244754 | 99.8826087 |
| 100.319964 | 100.188736 | 100.29092  | 100.590683 |
| 100.19     | 100.243388 | 99.9026373 | 100.008406 |
| 99.968394  | 100.47736  | 99.8190038 | 99.3382737 |
| 100.314299 | 100.483379 | 99.9661988 | 100.236561 |
| 100.086028 | 100.401164 | 100.1832   | 99.8006549 |
| 99.939402  | 100.210914 | 100.094883 | 100.189851 |
| 99.9522318 | 100.368057 | 99.8069605 | 99.6606927 |
| 99.8270997 | 100.2342   | 100.078156 | 99.6379278 |
| 100.132182 | 100.165767 | 99.7193126 | 100.07434  |
| 100.188667 | 100.582702 | 99.6022256 | 99.9252719 |
| 100.069866 | 100.306752 | 100.268395 | 99.8352239 |
| 100.61105  | 100.287743 | 99.9590621 | 100.52087  |
| 100.475087 | 100.07278  | 99.8007159 | 99.9905314 |
| 100.578892 | 100.68155  | 99.9728895 | 100.112956 |
| 100.677365 | 100.366631 | 99.9499182 | 100.228299 |
| 100.397276 | 100.703886 | 99.8555795 | 99.8704674 |
| 100.793333 | 100.810021 | 99.5977651 | 100.869089 |
| 100.577059 | 100.758379 | 100.018609 | 99.8895225 |
| 100.546734 | 100.647651 | 99.489376  | 100.136227 |
| 100.220324 | 100.441084 | 99.6481683 | 99.7802508 |
| 100.101024 | 100.184618 | 99.8885869 | 99.9014952 |
| 100.247817 | 100.055355 | 99.7661474 | 100.10874  |
| 100.101357 | 100.029059 | 99.8007159 | 99.6296649 |
| 99.9888884 | 99.9357553 | 100.16915  | 100.109078 |
| 99.9782247 | 100.039356 | 99.977573  | 99.8687811 |
| 100.105523 | 99.9615762 | 99.8660616 | 100.347688 |
| 99.8975803 | 99.8765099 | 100.028645 | 99.945676  |
| 99.7201293 | 99.753742  | 99.7888957 | 99.8831146 |
| 100.014381 | 99.6384194 | 99.8720832 | 100.064391 |
| 99.7112984 | 99.955715  | 99.8785509 | 99.8171806 |
| 99.8567582 | 99.7168324 | 100.148409 | 100.475003 |
| 99.7441226 | 100.059949 | 100.033329 | 99.8418004 |
| 99.9602296 | 99.8882322 | 100.031768 | 100.240946 |
| 100.067367 | 99.9202311 | 100.035559 | 99.977041  |
| 99.6849723 | 99.8668469 | 100.184984 | 99.788345  |
| 99.8819179 | 99.8795197 | 100.009465 | 100.306037 |
| 99.8914153 | 99.7857409 | 100.062768 | 99.542315  |
| 100.171338 | 99.843719  | 99.9572779 | 100.085638 |
| 100.052704 | 99.9744074 | 100.393065 | 99.728313  |
| 100.161008 | 100.127748 | 99.908882  | 100.247185 |

|            |            |            |            |
|------------|------------|------------|------------|
| 100.129183 | 100.200142 | 99.7735071 | 99.7360699 |
| 100.24765  | 100.189053 | 100.099567 | 100.23791  |
| 100.259647 | 100.068661 | 100.344446 | 99.9805823 |
| 100.075698 | 99.8712824 | 100.063883 | 100.16169  |
| 99.9447339 | 100.023673 | 99.9327454 | 99.9569742 |
| 99.9872222 | 100.138679 | 99.752989  | 99.9991315 |
| 100.043373 | 100.323227 | 100.083509 | 99.9767038 |
| 99.8755863 | 100.350315 | 100.037789 | 100.19491  |
| 99.9135758 | 99.9664869 | 99.8952776 | 100.16911  |
| 99.7586186 | 100.080542 | 99.6903196 | 100.037242 |
| 99.8221011 | 100.161173 | 99.928954  | 100.065571 |
| 99.5816675 | 99.9685462 | 99.8691839 | 100.11987  |
| 99.8760862 | 99.9731401 | 100.046041 | 100.068101 |
| 99.9602296 | 99.8750842 | 100.078156 | 99.9227424 |
| 100.290139 | 100.036504 | 99.5373259 | 100.095081 |
| 100.120019 | 100.26113  | 100.028199 | 99.7254463 |
| 99.674142  | 99.8627282 | 99.8767667 | 100.084121 |
| 99.7851113 | 99.6777051 | 99.8923783 | 99.6856498 |
| 99.687305  | 99.8605105 | 99.8522342 | 100.045842 |
| 100.034876 | 99.9140531 | 100.063883 | 100.042469 |
| 99.7033006 | 100.01702  | 99.8640544 | 100.28597  |
| 99.9592299 | 100.015436 | 100.056969 | 100.530482 |
| 99.637652  | 100.006089 | 99.7425069 | 100.113799 |
| 100.094859 | 99.9191222 | 99.8388528 | 100.562522 |
| 99.9927206 | 99.9596752 | 100.058307 | 100.297942 |
| 100.099858 | 99.7870081 | 100.008573 | 100.638742 |
| 99.6681436 | 99.2640961 | 100.309431 | 99.8298278 |
| 99.7419566 | 99.4448422 | 100.20238  | 100.447685 |
| 99.658313  | 99.3374401 | 100.293596 | 99.8058824 |
| 99.6803069 | 99.2808876 | 100.090646 | 100.382594 |
| 99.6918037 | 99.2374832 | 100.244977 | 99.7556309 |
| 99.8452614 | 99.4147442 | 100.219553 | 100.244318 |
| 99.8645894 | 99.3876561 | 100.561001 | 100.023245 |
| 99.8860834 | 99.634776  | 100.186545 | 100.141286 |
| 99.7607847 | 99.7028923 | 99.8745365 | 99.9416289 |
| 99.7566192 | 99.572996  | 100.04894  | 99.8180237 |
| 100.039208 | 99.8736585 | 99.9927386 | 100.05714  |
| 100.098358 | 99.8760347 | 100.114286 | 100.033026 |
| 100.019213 | 99.8090272 | 99.9992062 | 100.134203 |
| 99.7539532 | 99.9020139 | 99.9597312 | 99.4374276 |
| 99.9610627 | 99.8571839 | 100.195243 | 100.082603 |
| 99.7069662 | 99.7938198 | 100.374108 | 99.5929038 |
| 99.9225734 | 99.886965  | 100.124768 | 100.041457 |
| 99.7756139 | 100.004981 | 100.250553 | 99.8181924 |
| 99.6884713 | 99.8662132 | 100.249215 | 99.5165147 |
| 99.9943869 | 99.847204  | 100.117854 | 99.7684467 |



|            |            |            |            |
|------------|------------|------------|------------|
| 99.903412  | 99.9222904 | 99.8736444 | 99.6020097 |
| 100.193332 | 99.9496954 | 99.9590621 | 99.7708075 |
| 100.133848 | 100.0788   | 100.045595 | 99.7515838 |
| 99.9968862 | 99.7127138 | 100.270179 | 99.6222452 |
| 100.082529 | 99.899321  | 100.038681 | 99.6799164 |
| 99.9059113 | 99.9889811 | 100.215315 | 100.127627 |
| 99.8425954 | 99.8415012 | 100.292704 | 99.8726596 |
| 99.9898881 | 100.368057 | 99.9441196 | 99.9525898 |
| 99.71662   | 99.8408911 | 100.219619 | 99.7911625 |
| 99.7498828 | 99.8582941 | 100.154016 | 99.6664204 |
| 99.7836446 | 99.9282228 | 100.100909 | 99.6778832 |
| 99.6189936 | 100.136901 | 99.9083387 | 99.3547337 |
| 99.7420661 | 100.29163  | 99.9395783 | 99.958553  |
| 99.6660605 | 99.8581359 | 100.345917 | 99.4369961 |
| 99.8952414 | 100.015555 | 100.152454 | 99.7775083 |
| 99.7567017 | 100.033749 | 100.255545 | 99.5652782 |
| 99.8649722 | 99.7625773 | 100.092429 | 100.032893 |
| 100.027794 | 100.104785 | 100.047801 | 99.8520165 |
| 99.8074275 | 100.225815 | 100.161157 | 100.092398 |
| 99.6930034 | 99.8282343 | 99.9973716 | 99.6989545 |
| 99.751546  | 100.040077 | 100.054272 | 99.5789324 |
| 99.8636417 | 100.150191 | 100.162272 | 99.6001722 |
| 100.024634 | 100.142755 | 99.9458263 | 99.6981117 |
| 100.112614 | 99.8942077 | 100.118983 | 99.9202875 |
| 100.116772 | 100.263153 | 100.157586 | 99.7818912 |
| 100.125919 | 100.240687 | 100.057396 | 100.105041 |
| 100.329321 | 100.698071 | 99.9888923 | 99.7142944 |
| 100.181135 | 100.75028  | 99.7302728 | 99.6259635 |
| 100.401668 | 100.212209 | 99.9893386 | 100.02615  |
| 100.354435 | 100.610423 | 99.9897849 | 99.6067465 |
| 100.212402 | 100.088015 | 99.4698683 | 100.179886 |
| 100.172321 | 99.9489482 | 100.096223 | 99.6729947 |
| 100.146708 | 99.931387  | 99.8904875 | 99.7941968 |
| 100.577628 | 100.311407 | 99.5231988 | 100.004404 |
| 100.038272 | 100.358711 | 100.041777 | 99.2225745 |
| 100.231362 | 100.098931 | 99.840281  | 100.063067 |
| 100.256808 | 100.187845 | 100.086628 | 99.7488514 |
| 100.073696 | 100.171075 | 99.9641238 | 99.2424658 |
| 100.498629 | 100.242744 | 100.102024 | 99.7690798 |
| 100.152529 | 100.056689 | 100.406834 | 99.1035638 |
| 100.041099 | 100.295586 | 99.773562  | 99.7539085 |
| 100.26529  | 100.030426 | 100.158479 | 99.7736312 |
| 99.9757374 | 100.182466 | 100.47266  | 99.210606  |
| 100.208245 | 99.909554  | 100.10738  | 100.231131 |
| 100.099974 | 99.9793245 | 100.011429 | 99.6792318 |
| 100.202424 | 100.118865 | 99.9511816 | 99.8678621 |

|            |            |            |            |
|------------|------------|------------|------------|
| 100.20259  | 99.9881842 | 100.167628 | 99.7877911 |
| 99.9160306 | 100.081053 | 100.113851 | 99.7330057 |
| 99.950125  | 99.6231946 | 99.9029833 | 100.365482 |
| 99.9870468 | 99.8429478 | 99.9864378 | 99.7124401 |
| 99.9783984 | 99.7119502 | 100.144644 | 100.637049 |
| 99.7731668 | 99.581269  | 100.129471 | 99.9774329 |
| 99.5898887 | 99.4942537 | 99.9101238 | 99.7046859 |
| 99.7442282 | 99.4773253 | 100.02995  | 99.6640604 |
| 99.9464661 | 99.6032602 | 100.100016 | 100.463927 |
| 100.06904  | 99.8214313 | 100.090421 | 100.504721 |
| 99.9253442 | 100.019035 | 100.000049 | 99.7582913 |
| 100.234356 | 100.170916 | 99.9929088 | 100.52849  |
| 100.046421 | 100.361243 | 99.9058842 | 99.7766655 |
| 100.085338 | 99.9986261 | 100.132148 | 100.192697 |
| 99.9652596 | 100.164113 | 100.487387 | 99.7358714 |
| 99.7179505 | 100.083901 | 100.084843 | 100.17702  |
| 99.5286851 | 99.8397836 | 99.9685866 | 99.8189767 |
| 99.5418239 | 100.177719 | 99.8837933 | 99.923996  |
| 99.7267652 | 99.935184  | 100.184586 | 100.049412 |
| 99.7996108 | 99.9565423 | 100.073239 | 99.8437565 |
| 99.7490513 | 100.04071  | 100.107603 | 100.365819 |
| 99.7858067 | 99.7469145 | 100.229214 | 100.079081 |
| 99.6552501 | 99.8329806 | 100.075248 | 100.108581 |
| 99.6672247 | 99.5154538 | 100.521082 | 100.095769 |
| 99.8125833 | 99.7378966 | 100.307983 | 99.9979984 |
| 99.7849751 | 99.5013731 | 100.315123 | 100.224894 |
| 99.7934571 | 99.6928068 | 99.880223  | 100.115998 |
| 99.9128707 | 99.8141536 | 99.9061073 | 100.308842 |
| 100.185459 | 99.6616395 | 100.428478 | 100.483481 |
| 99.9306663 | 99.4116683 | 100.16919  | 100.227423 |
| 100.011495 | 99.7847266 | 99.9574296 | 100.156455 |
| 99.7728342 | 99.7173293 | 100.308429 | 100.24664  |
| 99.8335388 | 99.8021297 | 100.399024 | 100.235514 |
| 99.6025285 | 99.6826814 | 99.9714874 | 100.576532 |
| 99.6056885 | 99.7113173 | 100.241487 | 99.9988413 |
| 99.8090907 | 99.8668374 | 99.9473882 | 100.419087 |
| 99.8518334 | 99.8361448 | 100.109388 | 99.7911625 |
| 99.8134148 | 99.9459423 | 99.6160251 | 100.296874 |
| 99.7650174 | 99.7174875 | 99.7537026 | 100.104872 |
| 99.4273998 | 99.7075203 | 99.6300829 | 100.240908 |
| 99.9048876 | 99.7905804 | 99.5818846 | 100.150892 |
| 99.6243157 | 99.624302  | 99.7077357 | 100.071664 |
| 99.866469  | 99.7923207 | 99.4372898 | 100.531187 |
| 100.049747 | 99.7614698 | 99.5751904 | 100.071495 |
| 100.111949 | 100.111588 | 99.7389753 | 100.329408 |
| 99.9052202 | 99.6809411 | 100.044901 | 99.611635  |

100.008668 99.8995868 99.7902976 100.383688  
100.126085 99.8062431 100.137727 100.065089  
99.6427765 99.8217477 99.8768759 100.437124  
100.214564 100.249547 99.7311654 100.454319  
100.309197 100.439715 100.059851 99.9445616  
100.450398 100.50996 99.9984873 100.517195  
100.402333 100.272645 100.162495 99.7645284  
100.46653 100.358237 99.8476446 100.470164  
100.431105 100.150824 99.9268593 100.147352  
100.565321 100.418989 99.7728926 99.9642844  
100.574801 100.596659 99.8179669 100.327048  
99.9308326 100.476577 99.6178102 99.1494149  
100.436594 100.383867 99.851438 100.541469  
99.8396925 100.155412 99.8621487 99.7684055  
100.133403 99.9981514 99.932661 100.69824  
100.057398 100.070295 99.9150329 99.8331366  
99.9890425 100.085958 99.6515044 100.343062  
100.283909 100.249633 99.5977626 99.8359596  
100.366321 99.9482861 99.7584265 99.9375311  
100.292584 99.9873585 99.6480399 100.180999  
100.090559 99.932151 99.8160778 99.8327539  
100.295086 100.083537 99.8956277 100.343817  
99.9559316 100.138428 100.008696 99.9829177  
100.391011 100.086226 99.8180889 100.242752  
100.197661 100.104101 100.153941 99.6623433  
100.365487 100.340591 99.8473615 100.467322  
100.015321 100.301203 99.6659163 99.7126229  
100.253714 100.275418 99.8634502 100.411644  
99.7904414 100.004285 100.056068 100.004346  
100.481597 100.127354 99.9081411 100.457368  
100.145778 100.061707 99.6326215 99.8896137  
100.106908 99.9013044 99.8793155 100.56012  
99.7861039 99.9190214 99.977859 99.9036177  
100.228023 99.761783 100.387675 100.604832  
99.9409174 99.6880676 100.391474 99.4867023  
100.18665 99.7905731 100.108803 100.422779  
100.238032 100.192528 100.085341 99.7328697  
100.160959 99.8196796 100.161762 100.234484  
100.076212 100.112327 99.8319431 99.821112  
100.054025 100.021369 99.7445723 99.6878205  
100.142442 100.194584 99.9742837 99.7347256  
99.9706122 100.110745 99.8893709 100.109291  
99.909888 99.9615739 100.385217 99.9231896  
99.8915372 100.169749 99.9698146 99.6098704  
100.228023 100.341857 99.9812108 99.789392  
100.283576 100.447052 100.075062 99.6923761

|            |            |            |            |
|------------|------------|------------|------------|
| 100.23186  | 100.054272 | 100.260529 | 99.6409155 |
| 100.226355 | 100.258176 | 100.163326 | 99.563134  |
| 99.8948737 | 100.337586 | 100.068135 | 99.5509859 |
| 99.9212321 | 100.239984 | 99.913504  | 99.6518825 |
| 100.032337 | 100.385042 | 99.5716184 | 99.6520512 |
| 100.352474 | 100.364794 | 100.017187 | 99.7794373 |
| 100.215344 | 100.274785 | 99.9226657 | 99.6815778 |
| 100.190321 | 100.466983 | 99.8616626 | 100.002827 |
| 100.055359 | 100.14175  | 99.8469145 | 99.4976693 |
| 100.09156  | 100.390262 | 99.4073792 | 99.5513234 |
| 100.143943 | 100.189839 | 99.9528321 | 99.4389536 |
| 99.9966369 | 100.395641 | 99.5705011 | 99.9422553 |
| 100.058696 | 100.322242 | 99.7215565 | 100.363558 |
| 99.7894404 | 100.25517  | 99.659883  | 99.8700417 |
| 99.7709229 | 99.8597011 | 99.938531  | 100.261142 |
| 99.8551694 | 100.227962 | 99.4992191 | 99.7806184 |
| 99.9827904 | 100.18446  | 99.6710557 | 100.161933 |
| 99.8119618 | 100.17576  | 99.9613233 | 99.9807243 |
| 100.017657 | 99.9193378 | 99.9099288 | 100.816411 |
| 99.9636056 | 100.070723 | 100.02322  | 100.231278 |
| 99.9804549 | 99.8093974 | 99.8046816 | 100.426997 |
| 99.6905133 | 99.5950533 | 99.943     | 100.008226 |
| 99.8069571 | 99.717965  | 99.7186516 | 100.169863 |
| 99.9362463 | 99.7374221 | 100.098301 | 99.9652017 |
| 99.8366519 | 99.5634158 | 100.07104  | 99.8867454 |
| 99.8404888 | 99.3666304 | 100.212933 | 99.8300543 |
| 99.6433019 | 99.4435096 | 99.8960746 | 99.9017617 |
| 99.9464226 | 99.6119793 | 100.065677 | 99.9754938 |
| 99.9500928 | 99.7209706 | 100.084223 | 99.9827489 |
| 100.132766 | 99.6754126 | 100.358402 | 100.226385 |
| 99.9255695 | 99.8158831 | 100.154388 | 100.343648 |
| 99.9494255 | 99.7141685 | 100.220084 | 100.049057 |
| 99.6476393 | 99.3979516 | 100.338738 | 100.066604 |
| 100.063367 | 99.5094738 | 100.283545 | 100.332344 |
| 99.9108889 | 99.6978752 | 100.296282 | 100.023411 |
| 99.6589834 | 99.4653395 | 100.298293 | 100.169526 |
| 99.6341265 | 99.4715088 | 100.437729 | 99.607677  |
| 99.8636775 | 99.6255835 | 99.9114929 | 100.427504 |
| 99.8781913 | 99.6508935 | 100.359073 | 99.890626  |
| 100.107575 | 99.4895422 | 100.401082 | 100.442183 |
| 100.093228 | 99.5031463 | 100.133383 | 99.8325852 |
| 100.2035   | 99.638713  | 100.010036 | 100.014469 |
| 100.120254 | 99.9615739 | 100.284439 | 99.8907947 |
| 100.122089 | 99.8231598 | 100.300974 | 100.010757 |
| 99.9522615 | 99.9256653 | 100.336727 | 99.7202154 |
| 99.7100318 | 99.7472297 | 100.269467 | 99.7613839 |

99.7874385 99.7124285 100.107239 99.9054736  
99.7759276 99.6991407 100.136065 99.7132978  
99.9864606 99.7445405 100.056068 99.8135194  
99.8851979 99.7598847 99.8156309 99.5162289  
99.791776 99.8146176 100.065453 99.631467  
99.5880829 99.9482861 99.704127 99.599747  
100.022995 100.405923 99.7602141 99.6183065  
100.196994 100.142857 100.348794 100.227904  
100.143109 100.061074 100.217402 99.7274705  
100.298923 100.093661 99.849596 100.157209  
100.010483 99.9274054 100.246675 99.9810617  
99.860341 99.8600175 99.8636736 99.718022  
100.036675 100.048261 100.05361 100.031341  
99.7590783 99.8707742 99.9678035 99.7566597  
100.180311 99.9313601 99.8853487 100.762251  
99.7944452 99.8424586 99.8165247 99.6893391  
100.060531 100.083062 99.766024 100.726988  
100.086389 100.072938 99.5416755 99.8111573  
100.083886 100.245204 99.7304947 101.10206  
100.079048 100.284751 99.8605453 99.9343253  
100.068872 100.419211 99.9255706 100.669115  
99.9711127 100.334106 100.070816 99.935169  
99.9983051 100.980618 100.016293 100.737111  
99.7051939 100.599703 99.9005437 100.260299  
99.7762613 101.190691 100.27483 100.438302  
100.580284 100.118508 101.754558 99.9556029  
100.314734 100.168942 100.589045 100.090407  
100.445911 100.255638 100.281035 100.834321  
100.863943 100.925727 101.252857 100.239377  
101.284106 102.258681 100.284193 99.6456778  
101.170885 101.693488 100.659364 100.102704  
101.340716 101.177896 99.4654289 100.34943  
100.78892 100.190616 100.183769 100.056317  
99.8372007 99.1291437 99.769018 99.4251032  
99.8985283 98.6778791 99.7239639 99.7806376  
99.7611119 98.4070925 99.7094371 100.10644  
100.243363 99.5541494 100.037027 99.8312281  
100.761223 100.618539 99.9361815 99.4925053  
100.330865 100.675225 99.9416554 99.3978622  
99.6976538 99.8735637 99.2576325 99.3850978  
100.377431 100.423334 99.9494451 99.5295531  
100.128317 99.4084054 99.7119635 99.2859405  
99.8746364 99.6476535 99.229 99.2615014  
100.12299 100.033479 99.6913312 99.4322637  
100.149165 99.6020824 99.8852324 99.2261659  
100.205623 100.466404 99.791124 99.2059297

99.9061372 100.048484 100.165452 99.2727091  
99.7786123 99.7187888 100.006921 99.4378676  
99.9208984 99.245989 99.7467015 99.8170628  
100.377431 99.4321635 100.980006 99.4700899  
100.118577 100.435144 100.437251 98.9286938  
100.974424 101.246948 100.563781 100.121384  
99.7105889 98.4523857 100.302299 97.5464059  
99.4871921 95.9848795 100.238718 99.3170731  
101.512068 99.637789 101.067798 100.900633  
101.827532 100.769285 100.771157 100.570316  
101.064057 101.467161 100.076607 100.890204  
101.129037 100.605063 101.35665 100.961965  
101.659376 101.547328 100.353038 101.686732  
101.787053 101.912452 99.6066968 101.589442  
101.661354 101.232637 99.9858674 101.407161  
100.477564 100.423612 100.094924 100.634294  
100.766549 100.844866 100.271561 100.563156  
99.9320074 100.072242 99.7408066 99.9085927  
99.7188065 100.573524 100.178295 100.364841  
100.945967 101.416728 100.536412 101.010376  
101.442066 102.397895 100.189243 101.580102  
100.471934 101.023538 100.031974 100.973951  
101.070448 101.521208 100.830948 100.816731  
100.362822 100.135597 99.873232 99.4758494  
100.96712 101.313081 100.395144 101.277494  
101.553156 101.925651 100.897266 101.24963  
101.603679 100.184642 100.070502 100.577165  
101.172712 100.603534 100.809263 100.67928  
101.396565 102.237007 99.9281813 101.542121  
101.007751 100.216736 101.164223 99.9744381  
101.414065 101.440208 100.29093 100.634294  
100.692135 100.261751 99.6725938 100.518792  
101.094797 100.784707 100.496621 100.084803  
99.8848323 100.423334 100.15682 99.5826342  
101.13208 100.499193 100.416408 100.24249  
102.624334 103.255548 101.640449 101.253521  
101.514959 102.211998 100.189874 100.665426  
100.929988 100.167553 100.576203 101.01489  
100.89164 100.571857 99.9376553 99.9373903  
100.778419 101.366988 99.9835515 100.665582  
100.621981 100.71246 99.6502772 100.191121  
99.7066323 99.5556777 100.726734 99.1383719  
100.439215 100.386238 99.9839726 101.091165  
99.0740299 99.172075 99.9601823 99.9607398  
98.9687229 98.5695089 100.275351 99.7616468  
99.1027914 98.4232091 100.593046 99.5778087

99.3496236 99.2093099 100.13703 99.3952159  
99.0839214 99.1403975 100.15282 99.9654097  
99.8682449 99.6201441 99.7098582 100.567359  
99.4681699 99.4625905 100.229033 99.9615181  
99.6413481 99.7961762 100.258719 100.030321  
100.370127 100.31024 100.332405 100.79774  
100.275168 100.045567 99.7332274 100.405002  
99.7850038 100.028755 99.8233356 100.607208  
99.6329783 99.9041296 100.441672 100.17571  
99.8455705 100.207149 100.48441 100.150026  
99.2434036 100.082385 98.9007785 100.192211  
98.2110305 98.262321 98.8329868 98.9171747  
98.7517176 98.760685 100.217033 99.4521886  
99.1861848 99.5820756 98.7917222 99.3496067  
98.0471352 99.2226478 99.554274 98.6016457  
99.519606 100.753446 99.9490241 100.237976  
99.0828562 98.9702008 99.026888 99.7703639  
98.8874601 98.2305046 99.7418592 99.104593  
98.7145863 97.9441572 99.0041504 98.7610447  
98.9433093 98.7046937 101.065272 99.2579211  
99.9358118 100.784707 100.431566 100.884133  
99.188924 100.001524 99.1679453 99.4582595  
98.3110112 99.5770739 99.5437474 99.2292791  
98.5741263 99.631259 99.579117 99.6887964  
98.9185043 99.8150715 99.8437574 99.408136  
98.5885832 99.0935761 99.1927883 99.5010668  
97.7102139 98.1989661 99.3283717 99.2398642  
97.2323762 97.9392944 100.145241 98.4369542  
97.4954913 98.4912878 99.2793175 99.1101969  
97.8999794 98.5433889 99.1397339 99.4934393  
98.0822882 98.8939248 99.8241778 100.123408  
97.5685366 99.7265692 97.7506348 100.57701  
98.3948611 98.7516542 98.8833042 98.5168093  
100.785319 100.877246 100.961859 100.057447  
99.6807432 100.174155 99.7684058 99.7514716  
98.5707924 99.4676875 99.3032618 99.2766336  
98.2804054 99.2815381 99.2132818 99.0559451  
98.5474509 100.045271 99.7211927 99.4201277  
98.1808968 99.6190834 99.1736905 98.7795399  
98.1005835 99.3131961 99.2835721 98.5289699  
99.0099816 99.9491716 99.7021381 99.0324445  
99.262285 99.2427042 100.264884 98.8642046  
98.7433968 98.8006168 98.8144055 98.8144018  
99.031941 100.610192 100.263825 99.7475808  
98.7152948 99.9080864 99.4078504 99.7520941  
98.7200553 100.015583 99.9070809 99.6655619

98.8742322 99.7742783 99.458451 99.8490538  
99.5565111 100.948441 100.182737 99.5451015  
100.585842 102.329577 99.2225973 100.206389  
99.5128993 101.253906 98.3236436 99.7696807  
99.7343366 101.302167 100.400172 99.3209891  
98.8722359 100.835598 99.8583858 99.3037138  
99.7232801 101.630004 100.35677 99.9592424  
100.17844 103.234576 100.370531 100.694767  
100.637746 101.532075 99.239323 99.7811976  
100.436886 100.829688 99.8566921 99.0473853  
100.849201 100.888502 99.9259238 100.031145  
100.935964 100.126738 100.557478 99.700735  
100.838759 99.6120483 99.9644565 100.223975  
100.609029 99.5927721 99.7252154 100.007489  
100.855805 99.7289721 100.224658 99.5581747  
100.987254 99.7006909 100.319295 100.131062  
100.643735 99.333598 100.079207 100.075656  
101.166001 100.897225 99.2001553 100.762467  
100.880528 100.092829 100.472367 99.8828263  
101.330774 100.921285 100.128749 100.686051  
101.001843 100.101271 99.9629744 100.247787  
101.152795 101.002471 100.000872 100.683872  
100.693182 100.212707 100.434682 100.34179  
100.887899 100.57164 99.7260622 100.897868  
99.9173833 100.142215 100.12388 99.931384  
99.235258 99.6171136 100.037287 99.0227952  
100.481572 100.989104 100.112659 100.280314  
100.325246 101.241665 99.8018572 100.471277  
100.347819 100.682513 99.9466722 100.134641  
100.308661 100.391259 99.5003711 100.411202  
100.320025 99.8378759 99.90327 100.387546  
100.367322 99.959865 99.7828026 100.215882  
100.39266 100.02487 99.9447667 100.3835  
100.06465 99.6299175 99.3638131 100.384433  
99.8640971 99.7029422 99.8772287 100.15643  
99.7727273 99.1613781 99.4476533 100.150049  
99.9649877 99.4496776 99.7264857 100.285295  
99.9941646 99.4688131 100.003836 100.29759  
99.8339988 99.5522497 99.9913446 100.216038  
99.7896192 99.3303618 100.323318 100.017294  
100.034859 99.6543998 99.6983272 100.217594  
100.345516 99.8090319 100.248793 100.134641  
100.248004 99.6579173 99.8304391 100.436415  
100.359029 99.4320898 100.271024 100.431435  
100.159859 99.6793041 100.052319 100.44513  
100.692721 100.056387 99.7578199 100.448554



|            |            |            |            |
|------------|------------|------------|------------|
| 100.464988 | 100.428404 | 100.278434 | 100.293855 |
| 100.023342 | 100.211441 | 99.8617733 | 100.568237 |
| 100.018888 | 99.503426  | 99.8321328 | 99.6246302 |
| 100.397881 | 100.310496 | 100.433411 | 99.8456299 |
| 99.9990786 | 100.797608 | 99.8128665 | 100.338521 |
| 100.041462 | 100.048367 | 100.068622 | 99.9678023 |
| 99.88836   | 99.3938187 | 99.6832952 | 100.282649 |
| 100.176751 | 99.648631  | 100.779782 | 100.454468 |
| 100.437039 | 99.9065387 | 100.860446 | 100.359843 |
| 99.971898  | 99.948046  | 100.066716 | 100.006088 |
| 100.419994 | 99.1276095 | 99.5592286 | 100.407623 |
| 99.9765049 | 98.7565769 | 100.103767 | 100.224753 |
| 99.972973  | 99.2556488 | 100.331999 | 99.8941876 |
| 99.8992629 | 99.3971955 | 99.4048864 | 100.228488 |
| 100.316186 | 100.01896  | 100.311462 | 100.291987 |
| 99.9915541 | 100.652544 | 99.5526654 | 100.263973 |
| 100.003686 | 99.6503194 | 100.486764 | 100.339611 |
| 99.8714681 | 99.6605907 | 101.04824  | 100.170748 |
| 100.002764 | 100.053432 | 100.184643 | 100.250744 |
| 99.9772727 | 100.225511 | 101.116836 | 100.042351 |
| 99.7813268 | 100.135321 | 100.279281 | 100.428633 |
| 99.5643428 | 98.8977015 | 100.114988 | 99.8650841 |
| 99.719441  | 99.0257408 | 99.4952898 | 100.233469 |
| 99.7905405 | 98.8214408 | 100.103343 | 99.7418223 |
| 99.4918612 | 99.6016363 | 100.646823 | 99.8954326 |
| 99.5248771 | 99.2214581 | 100.602786 | 100.060093 |
| 99.9788084 | 98.8131393 | 100.142723 | 99.6682076 |
| 99.3358415 | 99.2206139 | 100.401865 | 99.3108729 |
| 99.296683  | 100.243381 | 100.262767 | 99.0547001 |
| 99.7972973 | 99.8496949 | 99.5353045 | 99.5407437 |
| 100.671222 | 100.700945 | 100.149921 | 100.459449 |
| 100.412162 | 100.725287 | 100.193323 | 100.4291   |
| 100.252764 | 100.350174 | 100.383023 | 100.396573 |
| 99.9914005 | 99.8751621 | 100.421132 | 99.6815921 |
| 99.5927518 | 100.038518 | 100.001931 | 99.9449241 |
| 98.8313882 | 99.2739401 | 99.6934577 | 99.1356295 |
| 98.9092445 | 98.9877512 | 99.8971302 | 99.2693188 |
| 99.3221744 | 99.5862997 | 100.142511 | 99.7601871 |
| 99.352887  | 98.9952084 | 100.612525 | 99.9877234 |
| 99.1827396 | 98.8778625 | 99.7607839 | 99.3071377 |
| 99.9897828 | 99.7545583 | 99.922712  | 100.317795 |
| 99.9685515 | 99.9058523 | 100.077523 | 100.239305 |
| 99.7383925 | 99.175627  | 99.4160016 | 100.306672 |
| 100.034707 | 100.182476 | 99.0293956 | 100.759754 |
| 99.8733186 | 100.019814 | 99.303259  | 100.185255 |
| 100.022091 | 99.6034046 | 99.9130363 | 99.7357766 |

|            |            |            |            |
|------------|------------|------------|------------|
| 99.700084  | 99.7635405 | 99.1882027 | 100.151571 |
| 100.090708 | 100.023182 | 99.6290766 | 100.431849 |
| 100.349175 | 100.46303  | 99.6686206 | 100.556086 |
| 100.330406 | 100.727865 | 100.315208 | 100.788894 |
| 100.090554 | 100.368296 | 100.124639 | 100.841691 |
| 100.006706 | 100.306964 | 99.2338466 | 100.64711  |
| 100.898111 | 100.382611 | 99.0569502 | 100.72184  |
| 100.461793 | 99.8779232 | 99.2357397 | 100.609666 |
| 100.471486 | 101.262165 | 100.544058 | 101.310439 |
| 100.587181 | 100.016165 | 100.209196 | 100.399419 |
| 101.782438 | 100.592009 | 100.048706 | 101.061025 |
| 101.947365 | 101.944392 | 101.362073 | 101.053348 |
| 100.53318  | 100.657551 | 100.328249 | 100.400829 |
| 100.163325 | 100.222194 | 100.21193  | 100.301502 |
| 99.9185504 | 99.1697324 | 100.662059 | 100.048328 |
| 99.6105435 | 99.5301434 | 100.471911 | 99.4913757 |
| 99.4953101 | 100.050269 | 100.436364 | 99.8043968 |
| 101.345659 | 102.315469 | 100.876817 | 100.53243  |
| 101.681359 | 102.104107 | 101.485753 | 100.655413 |
| 101.66582  | 101.782712 | 100.673207 | 101.300726 |
| 100.251635 | 101.039715 | 99.5846947 | 100.867227 |
| 99.3742305 | 99.1478383 | 100.559203 | 99.8144235 |
| 99.0848394 | 98.9565454 | 100.589281 | 99.9433607 |
| 99.9214735 | 98.8594253 | 100.766598 | 99.679533  |
| 100.065477 | 99.1005414 | 100.26704  | 99.9372506 |
| 100.377945 | 99.1961177 | 100.368844 | 100.531176 |
| 99.5519268 | 98.4668748 | 100.31037  | 99.0569374 |
| 100.453793 | 101.08603  | 98.8646989 | 100.64664  |
| 99.5059258 | 100.068093 | 99.1549689 | 99.7061665 |
| 99.8807034 | 99.6396141 | 99.5905842 | 99.8141102 |
| 98.3849775 | 99.1575222 | 99.8648684 | 99.9099905 |
| 99.5356187 | 98.653817  | 100.248109 | 99.400822  |
| 99.5597731 | 98.4752956 | 100.45866  | 98.954477  |
| 100.137632 | 99.323272  | 100.729999 | 99.6398962 |
| 100.879341 | 100.739794 | 100.528914 | 101.178839 |
| 101.516125 | 102.121931 | 100.03882  | 101.53275  |
| 99.8490104 | 100.125355 | 100.692138 | 99.6480429 |
| 101.093654 | 102.510131 | 98.3600919 | 101.391436 |
| 99.2065344 | 99.2605369 | 100.548896 | 99.1689545 |
| 99.6759296 | 98.9655276 | 100.710648 | 99.8465403 |
| 99.8519335 | 99.2401866 | 99.8162797 | 99.8800671 |
| 100.178402 | 100.562255 | 100.818763 | 100.329232 |
| 100.997652 | 102.623812 | 99.9868659 | 101.011361 |
| 100.282405 | 101.796747 | 99.5783845 | 100.906551 |
| 99.4628479 | 99.2922553 | 98.6829647 | 99.8877438 |
| 98.7936021 | 98.47305   | 99.6896547 | 99.3608719 |

|            |            |            |            |
|------------|------------|------------|------------|
| 98.506211  | 98.2698276 | 100.028934 | 99.6054294 |
| 99.0906857 | 98.702798  | 99.4557559 | 99.8465403 |
| 99.4090005 | 98.8866526 | 99.7657979 | 99.8357303 |
| 99.4223854 | 98.3356504 | 100.052913 | 99.6608896 |
| 100.026245 | 99.1907845 | 100.64397  | 100.593843 |
| 99.9610129 | 99.3415171 | 100.406495 | 100.533056 |
| 100.46964  | 99.8563098 | 100.329721 | 100.143425 |
| 100.738877 | 99.5579322 | 99.5056067 | 99.9778275 |
| 99.6442365 | 99.5288803 | 99.5274821 | 100.137158 |
| 100.412869 | 100.166056 | 100.379361 | 100.275025 |
| 100.155786 | 100.754951 | 99.5899532 | 100.449553 |
| 99.1197632 | 100.093216 | 99.226064  | 99.6906564 |
| 100.037476 | 99.8071884 | 99.4092707 | 99.8526503 |
| 99.7376233 | 99.4272691 | 99.3291309 | 99.583966  |
| 99.3977695 | 99.4786361 | 100.387354 | 99.4587889 |
| 100.198095 | 100.568571 | 99.3800333 | 100.418219 |
| 99.2886901 | 99.896449  | 100.053754 | 99.1888512 |
| 99.4933101 | 99.5373011 | 99.650952  | 98.9776638 |
| 99.8620876 | 99.8710462 | 100.339397 | 99.228018  |
| 99.673468  | 100.103882 | 100.134735 | 99.3082317 |
| 100.828571 | 100.462468 | 100.52029  | 99.6259528 |
| 99.3233063 | 99.4321813 | 100.541324 | 98.214381  |
| 98.8902196 | 100.022761 | 100.247478 | 99.8210036 |
| 100.031938 | 100.678462 | 99.8682338 | 100.121178 |
| 99.7767011 | 100.395944 | 100.184376 | 99.4135121 |
| 100.441178 | 100.714812 | 100.432367 | 100.252465 |
| 100.302251 | 100.795512 | 100.172807 | 99.4044254 |
| 100.863033 | 100.607447 | 100.752506 | 99.2316214 |
| 99.4363857 | 99.3257983 | 100.076681 | 99.7020931 |
| 100.320713 | 99.8835371 | 99.6520037 | 100.296175 |
| 99.2759206 | 99.3231317 | 99.071674  | 99.0655541 |
| 99.3462299 | 99.55302   | 100.248319 | 99.5465225 |
| 100.095477 | 100.385278 | 99.864658  | 100.085145 |
| 99.1063783 | 99.5924575 | 100.172386 | 99.3046283 |
| 99.6265438 | 98.9533174 | 99.9856038 | 98.7779131 |
| 99.4016157 | 99.2898694 | 98.5552879 | 99.0581907 |
| 99.3876154 | 99.559476  | 98.9063463 | 99.1946479 |
| 98.9802216 | 99.2303623 | 99.1065906 | 98.9635637 |
| 100.206249 | 100.214054 | 99.9948588 | 100.094545 |
| 100.018706 | 100.080584 | 99.5274821 | 99.7360899 |
| 99.6273131 | 99.9323779 | 100.426057 | 99.389542  |
| 100.044553 | 99.9040278 | 99.9431151 | 99.568926  |
| 99.5659271 | 99.7885222 | 99.4134775 | 99.4260454 |
| 98.9766831 | 99.669929  | 100.223078 | 98.8180199 |
| 100.66549  | 101.004629 | 99.9172432 | 100.391586 |
| 100.936112 | 100.260088 | 100.474856 | 100.666223 |

99.8325485 100.295034 99.6801893 100.516136  
101.76213 101.707346 99.3596303 101.839191  
99.281613 99.1200496 100.511455 99.5568626  
98.7006038 99.9421887 100.459556 100.693507  
99.1843878 99.7215728 100.310054 99.985972  
99.7375877 100.400508 99.6251708 100.331664  
99.8361672 99.4478869 100.153383 99.0523234  
99.5217456 99.4327438 100.204833 100.097476  
98.6231376 98.889123 99.9079381 98.9673756  
99.1298577 98.5979322 99.1408186 99.0645919  
99.6511597 98.9585864 99.3672854 99.8339357  
99.1313766 99.6539154 99.7797334 99.9070809  
99.1129974 99.2656148 100.584387 99.0206427  
99.413141 99.574866 99.8396185 99.8362652  
98.4203584 97.7709005 100.047319 99.4009663  
98.9974057 98.1221077 99.7738293 99.4849822  
98.5011663 96.9938825 100.126603 98.8451565  
98.6360486 97.1254463 99.5865829 99.6859372  
98.6255679 97.6868498 99.6150494 99.6244394  
99.2850939 98.4687302 100.146846 99.5045497  
98.7642476 96.7692378 99.3074003 98.0626124  
99.0769984 97.3038284 100.542214 98.785367  
99.300739 98.2959052 100.689396 98.7645571  
98.984039 98.0790403 100.551703 99.2816978  
98.9314835 98.2454747 100.166245 99.6834525  
98.8664726 98.5951537 99.237183 99.8938806  
99.0217088 98.5530588 99.6489984 99.6481999  
99.0950739 98.8222991 99.7255416 99.7093871  
99.1799829 98.849112 99.178563 99.9471476  
98.5810628 98.8449442 99.3398732 99.967181  
98.2942859 98.3781499 99.4547936 99.6637297  
98.1153542 98.3862077 98.8650098 99.7086107  
98.227908 99.2757565 99.6749345 99.9341026  
100.187955 98.4742873 102.329489 99.7314394  
102.870412 102.487746 102.855381 101.375729  
101.332024 102.005253 101.727475 98.4871957  
99.9857833 99.9213497 99.212512 100.782338  
101.539057 101.414119 100.668521 99.4936789  
100.991325 100.608899 100.234776 100.296256  
101.004996 100.750882 99.8562767 100.500007  
100.706675 100.82229 99.6667109 100.242523  
100.541565 100.603203 99.4630172 100.05042  
100.598526 100.740879 99.7181614 99.9907862  
101.126055 101.441765 100.044366 99.9111186  
99.850901 100.197258 99.4478351 99.9120504  
98.874523 98.8895397 99.6671326 100.246406

98.9700647 99.1543344 99.8396185 100.114092  
99.2680817 98.8930129 99.8853758 99.7061259  
99.8910011 100.00415 99.6302316 100.95068  
99.011138 100.332712 99.8141041 100.192518  
99.0829223 101.019011 99.7242765 100.892133  
99.1388195 100.401898 100.697198 100.810757  
99.3848886 100.297008 99.8760978 100.439907  
99.1892485 100.793672 100.095606 100.583867  
100.337115 101.154326 99.9094142 100.889182  
100.773508 100.572083 99.9277592 100.590856  
100.775635 100.948992 100.067983 100.161769  
100.516351 99.8887018 99.7708772 100.041569  
100.762572 100.194758 99.7468388 100.202146  
100.190233 100.423015 99.7601232 100.415836  
99.4863541 100.616123 100.015057 100.502647  
102.107142 103.187104 100.816758 102.671842  
100.045022 100.754911 103.280059 96.8797112  
98.642732 97.1580941 100.501096 100.530756  
101.462958 102.083052 100.091389 100.869925  
100.810419 100.283532 99.9178487 100.218608  
101.178155 100.608065 99.8100977 100.504821  
101.04145 100.681558 99.8387751 100.435403  
101.075475 100.781724 99.86197 100.42096  
101.117701 100.174058 99.7259634 99.6020766  
101.416174 100.888559 99.5897459 100.430123  
99.5086826 100.107373 99.6504744 100.328558  
99.5507574 100.529294 99.3147805 100.353872  
100.695738 100.824513 98.9573678 100.416457  
100.337571 100.963996 99.6743019 99.8932594  
99.8344964 100.798395 100.076207 99.4882435  
100.421265 101.07611 98.7275271 100.704068  
100.473365 101.116538 99.8946537 100.735748  
99.9997576 101.06708 100.764674 100.540384  
99.4356214 100.271445 99.2660712 100.440373  
100.277117 101.197532 99.4834709 100.263178  
100.567539 100.767414 99.3911129 100.021225  
100.045934 100.70837 99.166333 99.9361215  
100.802368 102.426201 100.291709 99.7977514  
100.831684 101.556658 99.7386151 100.490223  
100.667942 100.920373 100.225709 99.8531926  
100.781711 100.899673 100.110156 100.038152  
100.691181 101.042073 99.6795735 100.68714  
99.2032227 99.4772004 99.3624356 99.4797021  
99.7395623 99.6821176 100.286859 98.4008503  
100.171854 101.15641 101.06663 100.26939  
100.849607 101.225873 99.8503725 99.9608138

|            |            |            |            |
|------------|------------|------------|------------|
| 101.170257 | 101.487056 | 100.153804 | 100.487117 |
| 101.109651 | 100.972054 | 99.3683397 | 99.999017  |
| 100.599285 | 100.260192 | 99.5825765 | 99.4831187 |
| 96.1894836 | 98.2228297 | 100.058283 | 96.6185008 |
| 100.773205 | 98.2642299 | 101.856312 | 100.98174  |
| 100.749509 | 100.125294 | 100.930624 | 100.644123 |
| 100.422024 | 100.180031 | 99.5874264 | 100.812621 |
| 100.72551  | 100.242826 | 99.995868  | 100.338187 |
| 100.912644 | 100.659746 | 100.545166 | 100.296567 |
| 101.095828 | 100.591672 | 100.005146 | 100.12838  |
| 102.736897 | 100.910509 | 101.461577 | 100.775194 |
| 100.427481 | 100.472356 | 100.244981 | 100.240525 |
| 100.389753 | 100.313378 | 100.156946 | 100.166809 |
| 100.319224 | 100.22435  | 99.9395087 | 100.127603 |
| 100.263324 | 100.199801 | 99.6057106 | 99.9884352 |
| 100.207732 | 100.260287 | 99.7277772 | 99.8983569 |
| 100.4957   | 100.489511 | 99.8834681 | 100.016463 |
| 100.208964 | 100.28661  | 99.8881551 | 99.9817927 |
| 100.201111 | 100.262357 | 99.7510086 | 99.9660776 |
| 100.330465 | 100.478715 | 99.7192183 | 100.037687 |
| 100.615045 | 100.45668  | 99.8329297 | 100.106055 |
| 100.232679 | 100.509771 | 100.0952   | 100.00253  |
| 100.459358 | 100.533137 | 99.6165112 | 99.9845469 |
| 100.159994 | 100.423997 | 99.5329598 | 99.9156921 |
| 100.212352 | 100.445884 | 99.3693213 | 99.6002564 |
| 100.17678  | 100.638876 | 99.5669917 | 99.8615804 |
| 100.248233 | 100.607672 | 99.6868166 | 99.6921167 |
| 99.9414776 | 100.368096 | 99.6735707 | 99.8879882 |
| 100.117492 | 100.361145 | 99.6747934 | 99.6606866 |
| 100.153527 | 100.6547   | 99.7722021 | 100.17005  |
| 99.9009773 | 100.181907 | 100.176509 | 99.6835301 |
| 99.8492354 | 100.360997 | 99.7768891 | 99.914072  |
| 100.000765 | 100.316779 | 99.7699605 | 99.7408821 |
| 99.8654048 | 100.408469 | 99.3870505 | 99.812005  |
| 100.004923 | 100.468955 | 99.4795684 | 99.6128933 |
| 100.230523 | 100.746833 | 99.5140079 | 99.9885972 |
| 100.383901 | 101.021163 | 99.5144154 | 100.063446 |
| 100.121188 | 100.280103 | 99.6754047 | 100.066849 |
| 99.6786106 | 99.7870496 | 100.710219 | 99.6026866 |
| 99.9054431 | 99.8667605 | 100.201371 | 99.5825972 |
| 100.134739 | 99.7701906 | 100.533539 | 99.8179994 |
| 100.484459 | 99.8490141 | 100.416363 | 99.6691111 |
| 100.616123 | 100.002668 | 100.276975 | 99.7162564 |
| 100.760261 | 99.7534794 | 100.123526 | 99.6728374 |
| 100.843726 | 99.9683586 | 100.216247 | 99.666519  |
| 100.277029 | 99.348566  | 100.134937 | 99.1808095 |

|            |            |            |            |
|------------|------------|------------|------------|
| 101.151097 | 100.172442 | 100.278809 | 99.9463123 |
| 100.909481 | 100.309089 | 100.734877 | 100.298687 |
| 100.54005  | 99.9553446 | 99.5881852 | 99.5686642 |
| 100.904245 | 100.131921 | 101.02262  | 100.066687 |
| 100.854043 | 100.413497 | 99.9342103 | 100.002692 |
| 100.564689 | 100.039936 | 100.544747 | 100.159357 |
| 100.29905  | 100.150851 | 100.413714 | 99.8330664 |
| 100.593486 | 99.9698374 | 100.408619 | 100.142022 |
| 100.254238 | 99.8663168 | 100.889957 | 99.8614184 |
| 100.500628 | 100.022781 | 100.651326 | 100.333843 |
| 100.148445 | 100.04526  | 101.065415 | 100.191759 |
| 100.302438 | 99.750078  | 100.675576 | 99.9633234 |
| 100.345557 | 100.044224 | 100.576945 | 100.359279 |
| 100.099013 | 99.9281334 | 100.375606 | 100.128251 |
| 100.390985 | 100.369575 | 100.461399 | 100.642312 |
| 100.087309 | 100.226569 | 100.026321 | 100.23048  |
| 100.283959 | 100.468215 | 100.201167 | 100.246357 |
| 100.076684 | 100.200245 | 100.126175 | 100.05972  |
| 100.176164 | 100.266942 | 100.386407 | 100.295932 |
| 99.9263862 | 99.962591  | 100.005331 | 99.8638486 |
| 99.9414776 | 100.045555 | 100.003701 | 100.02991  |
| 99.9182245 | 99.9759008 | 100.472607 | 100.151904 |
| 99.9391677 | 100.066555 | 99.945826  | 100.161139 |
| 99.9407076 | 99.893528  | 100.448153 | 100.090826 |
| 99.8393799 | 100.130294 | 100.070542 | 100.03315  |
| 100.106405 | 100.248604 | 100.484223 | 100.283133 |
| 99.9728922 | 100.137245 | 99.9395087 | 100.025374 |
| 100.073758 | 100.427546 | 100.295315 | 100.47139  |
| 99.6678311 | 99.9551967 | 99.9753747 | 100.055994 |
| 100.333545 | 100.736038 | 99.6760161 | 100.479167 |
| 99.4992082 | 99.7551061 | 100.566348 | 99.8444072 |
| 99.8415358 | 100.013464 | 100.16632  | 100.211525 |
| 99.5701992 | 99.9214785 | 100.499303 | 100.082078 |
| 99.3102582 | 99.5399312 | 99.6664382 | 99.5137424 |
| 99.7383601 | 100.243723 | 100.506639 | 100.26353  |
| 99.313646  | 99.7165078 | 100.136364 | 99.8968988 |
| 99.3767834 | 99.7835004 | 99.8954914 | 99.9296251 |
| 99.3064083 | 99.5777902 | 100.382739 | 99.5741726 |
| 99.5397085 | 99.3121859 | 99.6254777 | 99.9041894 |
| 99.4205175 | 99.7111838 | 100.210745 | 100.066849 |
| 99.7203429 | 99.7310006 | 99.5932798 | 100.271631 |
| 99.4416146 | 99.4590372 | 100.010018 | 100.281189 |
| 99.4386888 | 99.2596862 | 99.4329019 | 100.131491 |
| 100.027714 | 100.112548 | 99.2446055 | 100.372726 |
| 99.4272932 | 99.3689743 | 100.228067 | 100.12339  |
| 99.64581   | 99.8997392 | 100.487891 | 100.221083 |

99.4237514 100.002372 100.745678 100.007714  
99.4197476 99.4157065 99.6984323 99.9633234  
99.6510458 99.6934374 100.025098 100.057128  
99.574665 99.829641 98.8934858 99.7384519  
99.4859648 100.168301 100.424311 100.188033  
99.2789975 99.3939672 100.170396 100.008201  
99.4825769 99.7601343 100.237237 100.138295  
99.645656 99.5039948 99.2097585 100.286374  
99.339209 99.1222995 99.6399463 99.7640497  
99.7345103 99.7864581 99.973133 99.9555469  
99.4223654 99.7101486 100.745678 99.8312843  
100.193565 99.7727046 98.8951161 100.298687  
99.5138376 99.4309388 100.36501 100.147692  
100.030486 99.6100294 98.9802978 100.006094  
99.9420935 99.5201144 99.3744159 100.025374  
99.6807665 99.2446017 98.5768056 99.8965748  
99.7800924 99.5408185 98.8741263 99.8079547  
99.6237889 99.6651911 99.6175301 100.486133  
99.9026712 99.3540378 99.1355811 100.070413  
99.2645075 99.6801688 100.120646 99.7258388  
99.7386856 99.4278383 99.6340691 100.219543  
99.0141956 98.5092487 99.8873668 99.5367743  
100.63661 100.328786 99.1072505 100.385946  
100.182113 99.6969216 100.184583 100.002637  
99.7923458 99.102418 99.1534161 99.8134106  
100.771914 100.745679 99.7692974 100.490514  
100.322337 99.4315447 99.9030958 99.947601  
99.4653105 99.4982595 99.8322133 99.8160005  
99.2282215 99.0275491 99.6001598 99.6675655  
100.71441 100.16185 99.4943467 100.186845  
100.731938 99.8834267 100.558197 99.8828529  
100.256684 100.046804 100.377416 100.139417  
100.239309 99.6393986 100.224416 99.9344895  
100.553891 100.521962 100.138622 100.045371  
100.262373 99.5074514 100.628467 99.8404429  
101.037755 100.568366 99.9641733 99.973824  
100.794977 100.109813 100.350044 100.267133  
100.771453 100.277044 100.208279 99.8440041  
100.944119 100.447538 100.73714 100.517061  
100.41136 99.8592611 100.223395 99.8911083  
100.414897 100.433157 100.034239 100.260982  
98.593524 99.0990081 100.818236 99.3447962  
98.4797458 99.2856615 99.939252 99.4513068  
98.9371647 99.3636438 100.172531 99.9929247  
99.1227461 99.5019659 99.8628541 99.7646876  
99.8217129 99.7391744 99.8514149 99.9930866



99.76467 99.6198289 99.6706338 100.122745  
99.9889975 99.6401398 99.6640971 100.324273  
99.6201411 99.5500006 99.6414229 99.9571514  
99.7532922 99.6343579 100.0563 99.9848312  
99.6974794 99.4877334 99.7825751 100.001342  
99.8446222 99.5615645 99.8085177 100.123716  
99.7883482 99.7565202 99.9784723 100.124201  
99.7855806 99.6632677 99.9682587 100.090047  
99.7768166 99.7156018 99.5433721 99.9061622  
99.80726 99.708782 99.870208 99.9296334  
99.7674376 99.7133779 100.393962 100.001666  
99.9851536 99.8472524 100.239124 100.140065  
99.8470823 99.6819478 100.186626 100.093608  
100.024822 99.9569613 100.043839 100.247223  
99.9969927 99.8433978 99.8659182 100.100083  
100.066797 100.055106 99.4890356 100.082115  
99.9854611 99.765119 100.020144 99.9445255  
100.189339 99.8376158 100.0563 100.164183  
100.054958 99.805741 100.41439 100.107853  
99.9560941 99.9738624 99.873272 100.559471  
99.9213456 99.8035171 99.8077006 100.166611  
100.198103 100.076603 99.9063642 100.273446  
100.151977 99.6534828 100.07448 100.192349  
100.0751 99.80752 99.5558327 100.176  
100.182728 99.8128572 99.941499 100.222295  
99.7213113 99.5510384 100.091231 99.8119538  
100.594328 100.235088 100.343916 100.226827  
99.9055089 99.9400602 100.750826 99.559598  
99.9457925 99.8970662 100.273646 99.6835906  
100.218553 100.315443 99.843244 100.093446  
100.267139 100.103734 100.488745 100.066252  
99.8281705 99.9663014 99.7962613 99.8930508  
100.124916 99.9757898 100.176821 100.418158  
99.7617487 99.5359164 99.9801065 99.8933745  
100.470863 100.097359 100.313071 100.486467  
99.7560598 99.6585235 99.8812387 99.871522  
100.537285 100.17549 100.289988 100.416215  
99.9162717 99.9018104 100.062837 99.9254248  
100.201947 100.019673 100.073255 100.279273  
99.8433922 99.7829097 99.672268 99.9679967  
100.0628 99.9290893 100.07448 100.177942  
99.6542745 99.9040342 99.8961505 99.8338062  
100.320338 100.201434 100.237285 100.325406  
99.9554791 99.8770517 99.7756298 100.087133  
100.165815 100.142132 100.127795 100.35082  
100.155206 100.090391 100.047721 100.159165

100.075869 100.098693 99.9208675 100.166126  
99.9783884 99.9319062 99.8356859 99.8945076  
99.6388991 100.106551 99.3887379 99.9072953  
99.7683601 99.9029964 100.132494 99.6735547  
99.7875794 100.026641 99.9098368 99.8406048  
99.9139654 99.69366 100.021574 99.7183927  
99.8041849 100.059109 99.8489636 100.028051  
99.8227891 100.022935 100.039754 99.9058385  
99.9702395 100.266667 99.9600878 100.073212  
99.7643625 100.080903 99.5946445 98.9703903  
100.143982 100.533378 100.185605 100.019633  
100.199026 100.63775 100.117786 99.8033746  
99.8489274 100.634636 100.090618 99.8436803  
99.8369345 100.466515 99.9966526 99.7433208  
99.746527 100.451244 99.7327326 99.8948313  
99.9696244 100.646348 100.089188 99.6513785  
100.175655 100.843973 99.8871626 100.057835  
100.452874 100.863394 99.3740303 100.088104  
99.7154687 100.498983 99.4933254 99.731828  
99.9580929 100.656133 100.022391 99.9981046  
99.9382586 100.625889 99.968463 99.8380149  
99.870453 100.340498 100.078974 99.8592199  
99.8195603 100.35221 100.269356 99.965083  
100.169351 100.603058 99.9498742 99.922673  
99.9385661 100.525076 99.5917847 99.4998679  
100.178423 100.709802 99.7627607 100.090047  
100.064239 100.178916 98.8672052 100.14969  
99.8751505 100.209933 99.5571748 100.379599  
100.003158 100.722454 99.4765528 100.523577  
100.074701 100.893934 99.4152719 100.633992  
100.058546 100.640332 99.8894351 100.385761  
100.100395 100.728805 99.5763123 100.353658  
100.112395 100.507697 99.4928401 100.231569  
99.924538 100.127664 99.547606 99.9212391  
99.8028385 100.096057 99.6211023 100.031168  
99.7316035 100.174485 99.633725 100.202222  
99.4943587 100.043623 99.5398696 100.191845  
100.025929 100.42144 100.228007 100.742623  
99.9454624 100.291316 99.7324665 100.264158  
99.6825237 100.033432 99.9824762 100.386733  
99.8053002 100.312142 100.163468 100.198331  
99.7360653 100.092216 99.8892315 100.129423  
100.22394 100.1318 100.492268 100.61713  
99.9257689 99.7262149 99.8961536 99.6921401  
100.157936 99.6355269 100.324509 99.9771763  
100.103933 99.4229862 100.670206 99.6123689

100.494418 99.8969565 100.112164 100.013981  
100.323485 99.6628515 100.357694 100.115641  
100.053007 99.4831002 99.7247301 99.5047101  
100.271636 99.7796824 100.522399 100.285074  
99.9471548 99.8155736 99.9256743 99.7733705  
100.289175 100.040521 100.095876 99.9791219  
99.8868435 99.714842 100.611572 99.4466652  
99.8394561 99.4664101 100.485549 99.5063315  
99.9668482 99.7935663 100.893749 100.141907  
99.86715 99.7127742 100.568004 99.7304043  
99.9273074 99.7724451 100.821474 100.115965  
99.6265204 99.6341976 100.28033 99.6464176  
99.7656055 99.6712704 100.847738 100.035221  
99.5868257 99.5102771 100.609333 99.69441  
100.026083 100.136674 100.532782 100.025493  
99.7134486 99.7297597 100.476388 99.699112  
99.9260766 99.9600245 99.9930629 100.034086  
99.5683631 99.6424689 100.266485 99.6874381  
99.6942167 99.8941502 99.8303938 99.7234325  
99.586518 99.8477723 100.136187 100.15731  
99.4495868 99.390049 100.074906 99.6768992  
99.7846836 100.02457 100.380904 100.087753  
99.6075962 99.7548688 100.270557 99.8828128  
99.7840682 99.9830658 100.208258 100.206437  
99.3018857 99.4667055 100.319419 99.6854925  
99.8128391 100.098715 100.370113 99.9387499  
99.2018798 99.4593205 100.772409 99.5313005  
99.5792868 100.04894 100.295192 99.7153256  
99.4852812 99.8510217 100.31718 100.180658  
99.2623449 99.6788031 100.207241 99.7868279  
99.5409768 100.194573 100.692601 100.081592  
99.4705111 99.8705181 99.9002255 99.7266752  
99.5691324 100.160011 100.116643 100.0002  
99.3468115 99.8058254 100.047014 99.8254164  
99.6686767 100.130175 99.7554723 99.9252926  
99.2863464 100.08232 100.486974 99.9478296  
99.236805 99.5986019 99.8951357 99.7738569  
99.5745173 99.9879399 100.578998 100.140934  
99.6220586 99.6457183 99.5691866 99.7218111  
100.077316 99.8588498 99.9914342 100.256538  
100.133473 99.9189638 99.6783114 100.134287  
99.9588478 99.8666779 99.7913043 99.9074575  
100.089009 99.8275373 99.417715 99.9966327  
100.165783 99.8968088 99.8776269 100.154229  
100.305484 99.8957749 99.3287458 100.145636  
100.411952 100.356895 99.4838821 100.373438

|            |            |            |            |
|------------|------------|------------|------------|
| 100.117934 | 99.7225224 | 99.5983001 | 100.061649 |
| 100.100087 | 99.985429  | 99.6665031 | 100.336147 |
| 100.324869 | 99.9820319 | 99.5152351 | 100.488231 |
| 100.425952 | 100.186449 | 99.1577294 | 100.40619  |
| 100.228094 | 99.8392057 | 99.4270802 | 99.9513966 |
| 100.290252 | 100.279796 | 99.1394062 | 100.306152 |
| 100.216555 | 99.9204408 | 99.7021315 | 100.020142 |
| 100.548113 | 100.283045 | 99.689916  | 100.194277 |
| 100.5855   | 100.248483 | 99.767077  | 100.428403 |
| 100.445646 | 100.254834 | 99.9089799 | 100.135746 |
| 100.089779 | 99.714842  | 99.6958202 | 99.9392363 |
| 100.285636 | 99.9235425 | 99.2135133 | 99.9544772 |
| 99.9920805 | 99.6052484 | 99.4443854 | 99.8056357 |
| 100.420106 | 99.9889738 | 99.4867323 | 99.9358314 |
| 100.347794 | 99.9443683 | 99.5099417 | 99.7094887 |
| 100.390412 | 100.175962 | 99.7180116 | 99.946046  |
| 100.035468 | 99.8721428 | 100.274426 | 99.8531418 |
| 100.370257 | 100.243018 | 99.9588596 | 99.5773473 |
| 100.310869 | 100.152773 | 100.598135 | 99.8035279 |
| 100.39872  | 100.397956 | 99.6390183 | 99.7997988 |
| 100.041776 | 99.9316661 | 100.608315 | 99.7206761 |
| 100.239787 | 100.263401 | 99.949698  | 99.981554  |
| 100.056238 | 99.9944387 | 100.066356 | 99.6778721 |
| 100.227787 | 100.217023 | 99.7619872 | 99.9283732 |
| 99.9860801 | 100.041998 | 100.066152 | 99.7709385 |
| 100.212709 | 100.130175 | 99.400817  | 99.7260266 |
| 100.251173 | 100.26281  | 99.6412578 | 99.8182824 |
| 100.213171 | 99.9151236 | 99.5140135 | 99.8528175 |
| 100.470109 | 100.604293 | 99.7652447 | 100.078998 |
| 100.643965 | 100.971181 | 100.122954 | 100.521307 |
| 100.613194 | 100.714625 | 99.864597  | 100.441373 |
| 100.971062 | 101.083728 | 99.9883803 | 100.624264 |
| 100.472878 | 100.436949 | 99.8033162 | 100.10494  |
| 100.732894 | 101.225373 | 99.9743325 | 100.559895 |
| 100.183169 | 100.45098  | 100.228414 | 100.221516 |
| 100.49463  | 101.085524 | 100.666268 | 100.135941 |
| 100.649651 | 101.289096 | 100.400484 | 100.325228 |
| 100.47939  | 100.945956 | 99.7561154 | 99.6061304 |
| 100.485394 | 100.885803 | 99.5655995 | 99.9863244 |
| 100.653038 | 100.943141 | 99.7006333 | 100.163306 |
| 100.69645  | 101.175013 | 100.262186 | 100.125254 |
| 100.708149 | 100.814834 | 100.412926 | 100.338506 |
| 100.813293 | 101.125675 | 100.053108 | 100.212692 |
| 99.7997316 | 100.209302 | 100.123685 | 99.3038212 |
| 99.690432  | 100.211673 | 100.807421 | 99.5473526 |
| 98.8685301 | 99.8024531 | 100.963056 | 100.052227 |

99.2935669 99.9080916 100.32338 99.8778364  
99.5394139 100.047955 99.9743725 100.217226  
99.2946445 99.7514858 99.9352086 99.9009913  
100.020948 100.184856 100.658924 100.464805  
99.5585028 99.7914892 99.8574928 99.9461677  
100.223537 100.141296 100.155913 100.393883  
100.006631 99.7824514 99.9664173 100.011908  
100.317134 100.005878 100.0527 100.351945  
99.8591536 99.8497163 99.8921691 100.344335  
99.9348936 100.106775 99.9431638 100.477759  
100.012173 99.9061655 99.75122 100.219493  
100.256788 100.113442 99.6051713 100.357937  
99.8708533 99.8837932 99.7381653 100.085097  
99.8834766 100.082032 99.6796235 100.257707  
99.8951763 99.8679401 99.5048139 100.321828  
100.010172 100.039362 99.7903838 100.197795  
100.098535 100.127666 99.5741666 100.085259  
99.8106615 99.9589107 99.551525 100.030691  
100.170734 99.8683845 99.4191429 100.089793  
100.261253 99.6744423 100.134904 100.161525  
100.070825 99.7113343 99.836483 100.056599  
100.103923 99.5667296 99.9817157 99.9110305  
99.7746389 99.5819901 99.6694246 99.8622918  
100.234775 99.6251049 100.015168 100.105499  
99.9179598 99.5642109 99.5662114 99.8279643  
100.277417 99.8131206 99.7181754 100.277461  
99.7440042 99.4779814 99.4428044 99.6228085  
100.108541 99.6722199 100.075342 100.126225  
99.5409533 99.4173837 100.033118 99.7437646  
100.020332 99.5511727 100.283196 100.119587  
100.024334 99.6925179 99.4909433 100.100318  
100.48093 99.8304554 99.8903333 100.107604  
99.9736872 99.2821131 99.7065487 99.2725701  
100.457838 99.9106103 100.024143 100.159905  
100.002782 99.9008317 99.6949219 99.8503096  
100.155186 100.08944 100.345409 100.213664  
100.040037 99.886312 100.025163 99.8252116  
100.161652 99.8197879 99.6928821 99.6030539  
100.427357 100.233452 99.874627 100.102423  
99.7888016 99.8123798 99.7502001 99.7712914  
100.380097 100.141889 99.9054277 100.307579  
99.7407714 99.7428925 100.012312 99.4455033  
100.000935 99.8947571 100.350509 99.9550734  
99.5448019 99.4080496 100.231793 99.4765925  
100.018331 99.7642276 100.36132 99.8211635  
99.8422199 99.4447934 100.468001 99.6207035

|            |            |            |            |
|------------|------------|------------|------------|
| 100.132864 | 100.153742 | 99.9046118 | 99.9659222 |
| 99.7592446 | 100.075217 | 99.5961963 | 99.2894101 |
| 100.149182 | 100.362648 | 99.959482  | 100.518078 |
| 99.9456696 | 100.43658  | 99.9095073 | 100.457195 |
| 100.555592 | 100.63882  | 99.8024186 | 100.81051  |
| 100.069286 | 100.233452 | 99.171309  | 100.07943  |
| 100.208604 | 100.484584 | 99.8379108 | 100.525688 |
| 100.328526 | 100.361907 | 99.4707495 | 100.144685 |
| 100.407961 | 100.379094 | 99.44668   | 100.321666 |
| 100.453528 | 100.549627 | 99.1925227 | 99.8758933 |
| 100.159958 | 100.431691 | 99.4281179 | 100.027291 |
| 100.342689 | 100.123073 | 99.9250097 | 100.027291 |
| 100.161344 | 100.302347 | 99.9050198 | 100.304826 |
| 100.185821 | 100.178633 | 100.546736 | 100.484722 |
| 99.3346697 | 99.6117704 | 100.578353 | 99.3023639 |
| 99.674268  | 99.882608  | 100.880037 | 99.4150619 |
| 100.224306 | 100.348425 | 100.598955 | 99.7232004 |
| 100.239239 | 100.407096 | 100.489622 | 99.978876  |
| 100.358853 | 100.403244 | 100.090844 | 99.801247  |
| 99.993084  | 100.044547 | 100.197525 | 99.8543576 |
| 100.090684 | 99.9052765 | 100.011497 | 99.5609541 |
| 99.7455436 | 99.9725414 | 100.01578  | 99.8300692 |
| 100.01556  | 100.059215 | 100.12654  | 99.5913955 |
| 99.7681732 | 99.8226029 | 100.152242 | 99.8127435 |
| 100.238623 | 100.221599 | 100.430672 | 99.6428869 |
| 100.266795 | 99.7963785 | 100.082889 | 99.9644649 |
| 100.008632 | 99.6729607 | 99.8287318 | 99.3812201 |
| 100.330065 | 100.033435 | 99.7234789 | 99.9738564 |
| 99.2772489 | 100.080402 | 100.273813 | 99.5687264 |
| 99.0531078 | 99.503465  | 100.497781 | 99.9280323 |
| 100.00386  | 100.60978  | 99.7752894 | 100.288796 |
| 99.7141392 | 100.083217 | 100.251579 | 99.9442246 |
| 99.8046577 | 99.9243892 | 100.279116 | 99.9694845 |
| 99.7053645 | 100.226489 | 99.9802879 | 99.3983839 |
| 99.7758704 | 100.425617 | 100.020268 | 100.201357 |
| 99.6622604 | 100.000544 | 99.5443857 | 100.146466 |
| 99.7901871 | 100.044399 | 100.418842 | 100.304826 |
| 99.8240546 | 100.059364 | 100.355812 | 100.205082 |
| 99.9844632 | 99.8907568 | 100.840057 | 100.159096 |
| 100.002167 | 99.8482347 | 100.482891 | 99.989401  |
| 100.177816 | 100.005878 | 100.361116 | 100.259973 |
| 100.449063 | 100.115665 | 99.8101698 | 100.114081 |
| 100.595463 | 100.196857 | 99.4899234 | 100.32199  |
| 99.6986206 | 100.183412 | 99.8696237 | 100.088545 |
| 99.6003414 | 100.151317 | 99.8997555 | 100.12048  |
| 99.7221667 | 99.9172583 | 99.8944381 | 100.038694 |

|            |            |            |            |
|------------|------------|------------|------------|
| 99.6542585 | 100.110982 | 100.222343 | 99.6183902 |
| 99.9460249 | 100.266395 | 99.9292965 | 99.9234142 |
| 99.9393705 | 100.24124  | 99.8989677 | 100.087766 |
| 99.6617659 | 99.9804354 | 99.5127685 | 100.010965 |
| 99.4083898 | 99.6191549 | 99.7768649 | 99.940083  |
| 99.4140204 | 99.4534776 | 99.5107991 | 100.083092 |
| 99.6037539 | 99.5279312 | 99.4889388 | 99.9165597 |
| 99.5926633 | 99.5820004 | 99.7548077 | 99.9972556 |
| 99.6540878 | 99.5593029 | 99.9107841 | 100.156778 |
| 99.3705114 | 99.2087206 | 99.5102083 | 100.046795 |
| 99.4245991 | 99.3748315 | 99.5927261 | 100.086987 |
| 99.5571736 | 99.3618202 | 100.111269 | 100.39575  |
| 99.649481  | 99.508848  | 99.8613522 | 100.231242 |
| 99.46862   | 99.612071  | 99.6283722 | 100.277198 |
| 99.7583389 | 99.6114927 | 99.8438245 | 100.305551 |
| 99.8105497 | 99.8367328 | 99.6614581 | 100.133878 |
| 99.789563  | 99.4555016 | 99.8054212 | 100.397308 |
| 99.7175598 | 99.5001738 | 99.9682906 | 100.084494 |
| 99.710223  | 99.6136612 | 99.5616096 | 99.9336959 |
| 99.8687324 | 99.7981326 | 99.7555954 | 100.095399 |
| 99.7752306 | 99.794952  | 99.7567771 | 100.052247 |
| 99.6511872 | 99.7946629 | 99.9115719 | 99.9938283 |
| 99.7742069 | 99.7621346 | 99.6768195 | 100.132787 |
| 99.5836203 | 99.5331357 | 100.549854 | 100.240901 |
| 99.9782727 | 99.9499311 | 100.55399  | 99.7056289 |
| 100.053688 | 100.493804 | 99.4806673 | 99.7593742 |
| 99.9219669 | 100.226204 | 99.7355076 | 100.237318 |
| 99.8061135 | 99.935185  | 99.5728352 | 99.7289964 |
| 100.203667 | 100.880962 | 100.017722 | 99.8829105 |
| 99.8511581 | 100.515489 | 100.086061 | 99.5085628 |
| 99.9753721 | 100.232855 | 99.376683  | 100.29044  |
| 100.178926 | 101.033194 | 100.46005  | 100.19292  |
| 99.6124557 | 100.052865 | 99.5456575 | 99.9643852 |
| 99.6919663 | 100.528934 | 99.5610188 | 100.449028 |
| 99.5392582 | 100.075562 | 99.9708508 | 99.8945943 |
| 99.9965294 | 100.009928 | 99.766821  | 100.551066 |
| 99.699815  | 99.6623813 | 99.8310234 | 100.051936 |
| 99.2785453 | 99.1508926 | 99.7528383 | 100.239499 |
| 99.5865209 | 99.9983621 | 99.6460968 | 99.8137426 |
| 99.4464389 | 99.2113228 | 99.6762286 | 99.8838452 |
| 99.6720033 | 99.2784033 | 100.456899 | 99.7380319 |
| 99.7892217 | 99.7911932 | 100.116192 | 100.192764 |
| 99.8347783 | 99.9009219 | 99.8698206 | 100.200709 |
| 100.017346 | 99.899187  | 99.6275845 | 100.077796 |
| 100.073139 | 99.8569726 | 99.8530807 | 100.187623 |
| 99.7339397 | 100.023373 | 99.4798795 | 99.8685784 |

99.8736804 99.8718633 99.6720929 99.8138984  
99.3921806 99.1396161 99.3705778 99.8248033  
99.5711648 98.9580362 100.173502 99.4009164  
99.9366406 99.7715317 99.3126775 99.6551551  
99.8586656 99.8542257 99.6492479 99.9452239  
100.061196 100.014698 99.6267967 99.5741476  
100.3388 99.7541833 100.215253 99.8093807  
100.309112 100.01094 100.985288 99.4111981  
99.917872 99.7163059 99.6435366 99.989778  
100.262702 100.272611 99.8583981 99.6632558  
100.06785 99.9934467 99.6374315 99.1979306  
99.7861505 99.53169 100.138447 99.5261663  
100.10897 99.7158722 100.275517 99.9950746  
100.670493 100.712249 99.966912 99.9576866  
100.743861 100.873011 100.319828 99.7737063  
100.943832 101.123695 99.7575648 100.000839  
100.454313 100.825158 100.526615 100.19697  
101.187653 100.589653 101.060716 100.039006  
100.947074 100.323934 100.331645 99.3928157  
100.644387 100.153197 99.5027245 100.253052  
101.523952 101.262338 100.757823 100.025141  
100.628007 99.6054207 100.926403 99.7023574  
100.525804 100.135559 100.080743 100.279691  
100.563512 100.758945 100.152232 100.218312  
100.680048 101.144513 100.817496 100.016728  
99.9908989 99.8065176 100.772593 99.8676437  
100.418652 99.8535029 99.7981345 100.287169  
100.389305 100.148426 99.8999524 99.9107957  
99.9141182 99.4576702 99.5230094 99.8727846  
100.622206 100.821688 99.3152377 100.585961  
99.9113883 99.6645499 100.178229 99.9344748  
100.693015 100.20582 100.530751 100.812159  
100.254512 100.149582 100.247354 99.8382006  
99.9716184 99.4586822 99.707936 100.107239  
100.700181 100.729308 100.756838 100.420519  
100.715196 101.155211 100.655217 100.134501  
100.468645 100.831953 99.806209 99.8883629  
100.015639 99.9863627 100.479941 99.8640607  
99.4199922 99.0093585 100.210133 99.660919  
99.7489546 99.108389 99.9182678 100.159582  
100.662303 100.576642 100.005906 100.474109  
100.17995 100.853205 100.634932 99.4560638  
99.4684494 99.6570322 100.070305 100.235293  
100.146508 100.638229 100.43878 100.222363  
100.15265 100.375979 100.065579 99.7129507  
99.8465513 100.19917 100.463791 99.4741347



|            |            |            |            |
|------------|------------|------------|------------|
| 99.9552385 | 99.4422012 | 100.6306   | 99.6931662 |
| 100.071604 | 100.436265 | 100.406679 | 100.119857 |
| 99.6890657 | 100.026409 | 100.463201 | 100.203513 |
| 99.4711793 | 100.213193 | 100.111466 | 100.314275 |
| 99.9388587 | 100.884865 | 100.561868 | 100.15413  |
| 99.5542934 | 100.615254 | 100.440493 | 100.513904 |
| 99.552421  | 100.644112 | 100.46649  | 100.351525 |
| 98.7622806 | 99.0062443 | 100.35896  | 99.9583316 |
| 99.0662855 | 99.2157575 | 100.408983 | 100.64082  |
| 99.1965004 | 99.7088062 | 100.429662 | 100.400052 |
| 99.1182012 | 99.9595871 | 100.78258  | 100.116667 |
| 99.1238183 | 100.30892  | 100.585639 | 100.424471 |
| 99.5132715 | 100.805143 | 100.344189 | 100.121022 |
| 99.5113991 | 100.255676 | 100.417057 | 99.7471147 |
| 99.468675  | 100.0958   | 100.602576 | 100.14684  |
| 99.6296989 | 100.491595 | 100.560824 | 100.128021 |
| 99.4851859 | 100.080505 | 99.9310071 | 100.294754 |
| 99.5599105 | 99.9236582 | 99.8026016 | 99.9835283 |
| 99.5747193 | 99.5105478 | 100.220116 | 100.109356 |
| 100.103919 | 100.555517 | 101.068932 | 100.444379 |
| 99.4456959 | 99.6868737 | 101.052192 | 100.521836 |
| 99.302034  | 99.8010093 | 100.60553  | 100.47502  |
| 99.7090193 | 100.414975 | 100.259308 | 100.244672 |
| 100.170303 | 100.795043 | 100.309331 | 100.301442 |
| 100.061195 | 100.686246 | 100.126766 | 100.15104  |
| 99.9607681 | 100.630982 | 100.182698 | 99.9192922 |
| 99.9641724 | 100.374429 | 100.341235 | 100.128332 |
| 99.9258739 | 100.285833 | 100.220707 | 100.263025 |
| 99.7743821 | 99.7959591 | 100.434782 | 100.06534  |
| 99.8278297 | 99.6404114 | 100.523209 | 100.19459  |
| 99.994641  | 100.009224 | 100.404453 | 99.8656326 |
| 99.8160849 | 99.7541141 | 100.164382 | 99.9387341 |
| 99.6940403 | 99.8920581 | 100.266595 | 99.9978376 |
| 99.6215285 | 99.5886102 | 100.335721 | 99.7824212 |
| 99.6925084 | 99.3335005 | 100.222086 | 99.7552025 |
| 99.9023841 | 100.04674  | 100.079698 | 99.8972062 |
| 99.986811  | 100.025529 | 100.143506 | 100.186968 |
| 99.7587222 | 99.6483475 | 100.220313 | 100.225697 |
| 99.8317447 | 99.721504  | 100.203967 | 100.151351 |
| 100.000769 | 99.9806539 | 100.222086 | 100.225852 |
| 99.8458726 | 99.7744594 | 100.272897 | 100.153217 |
| 99.9881728 | 99.6402671 | 100.038931 | 100.114956 |
| 99.7051044 | 99.6160259 | 99.6905422 | 100.116511 |
| 99.5667191 | 99.6789376 | 99.9209631 | 100.108268 |
| 99.8039996 | 99.9943617 | 100.154535 | 100.069695 |
| 100.105792 | 100.005328 | 99.9069803 | 100.091314 |

|            |            |            |            |
|------------|------------|------------|------------|
| 99.8884265 | 100.256109 | 100.05961  | 100.080893 |
| 99.9226398 | 100.298675 | 100.037158 | 100.012458 |
| 100.137282 | 99.7971134 | 100.185258 | 100.048698 |
| 100.078557 | 99.8230861 | 100.166745 | 100.202833 |
| 100.12843  | 99.7981235 | 100.067684 | 99.9429336 |
| 100.16775  | 99.9154335 | 99.8752728 | 99.8726316 |
| 100.10426  | 99.7168866 | 99.9343551 | 100.152595 |
| 99.9588957 | 99.4749075 | 100.131493 | 100.094425 |
| 100.205708 | 99.8349181 | 99.8431714 | 99.849768  |
| 100.15992  | 99.6763403 | 100.060397 | 100.031744 |
| 100.463925 | 100.219603 | 100.262065 | 100.119933 |
| 100.403669 | 100.230713 | 100.033219 | 100.033922 |
| 100.176601 | 100.005905 | 99.8675921 | 100.155706 |
| 100.274135 | 99.8025965 | 100.42336  | 99.9857058 |
| 100.27822  | 99.9405405 | 100.033023 | 100.106401 |
| 100.176091 | 100.228549 | 99.9538523 | 100.23114  |
| 100.185623 | 100.009224 | 100.201998 | 100.153528 |
| 100.334221 | 100.053955 | 99.9503073 | 100.059896 |
| 100.05745  | 100.237207 | 100.003284 | 99.9962822 |
| 99.6908062 | 100.071414 | 99.9467624 | 99.9533545 |
| 99.82017   | 99.6819677 | 100.050353 | 99.8930068 |
| 99.6038261 | 99.5443123 | 99.8671982 | 99.9857058 |
| 99.6996575 | 99.6508005 | 99.8719248 | 99.9872612 |
| 99.7931058 | 99.5232456 | 99.9292347 | 99.8040406 |
| 99.8814476 | 99.5458996 | 99.6732114 | 99.9035832 |
| 99.8925116 | 99.6080898 | 100.011753 | 100.025989 |
| 99.8245956 | 99.4547065 | 99.9477471 | 100.287444 |
| 99.5410166 | 99.6023181 | 99.7494275 | 99.8709208 |
| 99.6911467 | 99.6961084 | 99.6722267 | 100.017124 |
| 99.6848487 | 99.6304552 | 99.6893605 | 100.033766 |
| 99.8348086 | 99.7300172 | 99.7468673 | 99.8307927 |
| 100.114132 | 99.8161601 | 99.8217049 | 99.9158705 |
| 100.005194 | 99.8598808 | 99.6919208 | 99.9530434 |
| 99.7927653 | 99.6757631 | 99.6373681 | 99.6705913 |
| 100.383754 | 100.502273 | 99.3262014 | 99.9902163 |
| 100.275667 | 100.045297 | 99.6355956 | 99.9261358 |
| 99.997024  | 100.123071 | 99.6501693 | 99.583336  |
| 100.409797 | 100.879598 | 99.3951307 | 99.7706005 |
| 100.375924 | 100.334316 | 99.5503202 | 99.7150744 |
| 100.276007 | 100.403865 | 99.5708021 | 99.7618905 |
| 100.342051 | 100.232733 | 99.54776   | 99.7933087 |
| 100.252688 | 100.030724 | 99.5723776 | 99.9278467 |
| 100.3412   | 99.9201952 | 99.6732114 | 99.7494477 |
| 100.387158 | 99.9927745 | 99.6649399 | 99.8860077 |
| 100.315157 | 100.046307 | 99.5459875 | 99.6203534 |
| 100.298476 | 99.7829727 | 99.731309  | 99.7962638 |

|            |            |            |            |
|------------|------------|------------|------------|
| 100.382222 | 100.209935 | 99.5741501 | 100.107645 |
| 100.344774 | 100.582211 | 99.2785416 | 99.8692099 |
| 100.659162 | 100.595341 | 99.3393964 | 100.242183 |
| 100.353285 | 100.249183 | 99.6927085 | 99.7046535 |
| 100.146643 | 99.5370977 | 100.180925 | 99.708853  |
| 100.279412 | 99.9300071 | 99.5995554 | 99.9483773 |
| 100.40469  | 100.236197 | 99.8303703 | 99.543519  |
| 100.656439 | 100.346725 | 100.065321 | 99.5782033 |
| 100.442478 | 100.097675 | 99.6513509 | 99.6441503 |
| 100.48316  | 99.860458  | 99.7994505 | 99.625175  |
| 100.495585 | 100.382365 | 99.9321888 | 99.9202254 |
| 100.298646 | 100.418871 | 99.9589727 | 99.9783956 |
| 100.412828 | 100.189797 | 100.152604 | 99.7732631 |
| 100.153278 | 100.006412 | 99.9333438 | 99.744791  |
| 100.283138 | 100.047742 | 99.8096283 | 99.7522591 |
| 100.441459 | 99.9986081 | 99.885867  | 99.9490745 |
| 100.293704 | 100.035892 | 99.8143563 | 100.060785 |
| 100.086814 | 99.833142  | 99.6998998 | 99.9764575 |
| 100.288251 | 99.9595899 | 100.020614 | 100.060007 |
| 100.414191 | 100.125345 | 100.018053 | 100.207968 |
| 100.184124 | 99.7514928 | 99.8356322 | 100.089879 |
| 100.149358 | 99.6432534 | 99.8417392 | 100.18323  |
| 100.212073 | 99.923751  | 99.7253127 | 100.169072 |
| 100.098402 | 99.7513483 | 99.6116441 | 99.7843097 |
| 99.9886518 | 99.4295203 | 99.9630907 | 99.8949308 |
| 100.417088 | 100.019996 | 99.3338753 | 99.9294707 |
| 99.2103423 | 99.0883278 | 100.210128 | 98.5124    |
| 99.5447069 | 99.1744569 | 100.338177 | 101.014056 |
| 100.872622 | 101.605725 | 100.469182 | 100.143245 |
| 100.772585 | 100.325783 | 100.676425 | 99.8288071 |
| 100.903638 | 100.420583 | 100.816294 | 99.9927939 |
| 101.093998 | 100.820736 | 100.72134  | 99.8493443 |
| 100.890516 | 100.485613 | 100.295231 | 99.8585238 |
| 99.6776348 | 99.3685363 | 98.9107211 | 99.5143692 |
| 100.086132 | 99.595131  | 98.3362715 | 99.3741869 |
| 99.8414087 | 98.7461237 | 99.9654546 | 99.1202717 |
| 99.3340675 | 98.2531936 | 99.8161293 | 99.5929398 |
| 99.2347124 | 98.3737165 | 99.5598334 | 99.8115371 |
| 99.5862895 | 99.0589919 | 99.4700017 | 99.9677447 |
| 100.104026 | 99.9382022 | 100.324387 | 99.8152711 |
| 99.7096738 | 99.3527845 | 99.633708  | 99.3993917 |
| 99.5946401 | 98.81679   | 99.7302376 | 99.8222725 |
| 99.8134597 | 99.3639119 | 100.355513 | 99.9153125 |
| 100.294556 | 100.281851 | 100.629736 | 99.6956261 |
| 100.667777 | 100.574777 | 100.168758 | 100.191165 |
| 99.7423945 | 99.5523554 | 99.5590454 | 99.3449368 |

|            |            |            |            |
|------------|------------|------------|------------|
| 99.459156  | 98.6873073 | 100.017462 | 99.577848  |
| 100.574557 | 100.069997 | 100.327145 | 100.074632 |
| 100.372097 | 100.137773 | 100.205006 | 99.3729422 |
| 99.3655952 | 98.9289312 | 99.0342396 | 99.5317948 |
| 100.191111 | 100.199335 | 100.260165 | 100.617158 |
| 100.40959  | 100.647755 | 100.200278 | 99.5517097 |
| 99.7275679 | 99.3396339 | 99.5962782 | 99.3654741 |
| 100.372268 | 99.9234619 | 99.6015972 | 100.340994 |
| 100.927668 | 100.857153 | 100.049179 | 100.099059 |
| 100.231842 | 100.280551 | 100.023569 | 99.442022  |
| 99.8720843 | 99.5195512 | 98.7738067 | 100.140133 |
| 99.7132526 | 99.389057  | 99.2387247 | 99.8043802 |
| 100.36903  | 99.680682  | 100.168364 | 100.079766 |
| 99.8584507 | 99.3783631 | 100.759361 | 99.8098257 |
| 99.2193746 | 98.9355787 | 99.7530895 | 99.6164331 |
| 99.1423446 | 98.6214099 | 99.6898528 | 99.9654109 |
| 100.116126 | 99.8895017 | 99.9552107 | 100.513071 |
| 99.8497593 | 99.4303874 | 100.1463   | 99.1442318 |
| 100.220935 | 99.5416616 | 99.888428  | 99.56509   |
| 100.338525 | 100.18604  | 99.8374052 | 100.521317 |
| 99.6266791 | 99.9910935 | 99.5499834 | 99.9453404 |
| 99.5907204 | 99.8736053 | 99.9723496 | 99.8748603 |
| 99.8673126 | 100.670588 | 100.6518   | 100.231151 |
| 99.5089187 | 99.8000488 | 99.7838214 | 99.9058218 |
| 99.2601051 | 99.5153604 | 99.396718  | 100.217304 |
| 99.7285904 | 100.778539 | 100.025933 | 100.258222 |
| 99.4894908 | 100.607292 | 100.282426 | 99.7121181 |
| 99.323331  | 100.541973 | 100.218402 | 100.054561 |
| 99.0216871 | 100.559603 | 99.7830334 | 100.359353 |
| 99.5003977 | 100.861055 | 100.47647  | 99.9657221 |
| 99.5508421 | 100.558447 | 100.407127 | 100.005085 |
| 100.784344 | 101.606447 | 100.255043 | 100.626493 |
| 100.114422 | 100.54573  | 100.931539 | 100.218237 |
| 100.309553 | 100.464659 | 100.275531 | 100.210147 |
| 100.380278 | 101.369303 | 100.153786 | 100.218704 |
| 100.049321 | 100.789811 | 99.9039909 | 100.185564 |
| 100.277344 | 101.058169 | 100.213477 | 100.124108 |
| 100.314836 | 101.218577 | 100.51587  | 100.178874 |
| 99.9290047 | 100.858598 | 100.192004 | 100.405562 |
| 100.043698 | 100.539805 | 100.610036 | 100.038692 |
| 100.280241 | 100.797903 | 100.206976 | 100.622603 |
| 99.9966616 | 100.411623 | 100.308824 | 100.551034 |
| 100.285183 | 100.316679 | 100.024948 | 100.534542 |
| 100.090393 | 99.8893571 | 100.076168 | 100.590397 |
| 99.9860955 | 99.8546743 | 100.448497 | 100.133443 |
| 100.033643 | 99.7883433 | 99.877199  | 100.293851 |

|            |            |            |            |
|------------|------------|------------|------------|
| 100.1543   | 99.7637763 | 99.8167203 | 99.8358084 |
| 100.323528 | 99.7402209 | 99.5476194 | 99.9910825 |
| 100.194349 | 99.6922429 | 99.6713349 | 100.815218 |
| 99.8402157 | 99.498886  | 100.552315 | 100.04087  |
| 100.293022 | 99.6717222 | 99.8431182 | 100.615135 |
| 100.59194  | 100.294857 | 99.6973388 | 100.631783 |
| 100.185658 | 100.321881 | 99.8492251 | 99.6470834 |
| 99.9995587 | 100.051066 | 100.202839 | 100.097036 |
| 99.751938  | 99.7562617 | 100.14039  | 100.312677 |
| 99.5406169 | 99.6500455 | 99.8661671 | 99.9677447 |
| 99.4110974 | 100.04832  | 99.7690465 | 100.423298 |
| 99.6285537 | 100.302372 | 100.360438 | 99.8832619 |
| 99.7354073 | 99.8536627 | 100.192595 | 99.9056662 |
| 99.8158456 | 100.175491 | 100.265681 | 99.9935719 |
| 99.9763815 | 100.385611 | 99.7917014 | 100.03169  |
| 99.9676901 | 100.863801 | 99.7247217 | 100.013954 |
| 99.9685422 | 100.602812 | 100.375016 | 99.9590319 |
| 100.057161 | 99.97881   | 100.549163 | 100.294007 |
| 100.086984 | 99.9283753 | 99.7985963 | 99.9468963 |
| 100.068749 | 100.47463  | 100.352361 | 99.8421874 |
| 100.006716 | 100.23185  | 99.2296627 | 100.073854 |
| 100.032762 | 99.8350543 | 99.646833  | 100.034847 |
| 99.843024  | 99.9106605 | 100.040201 | 100.2986   |
| 100.553007 | 100.862459 | 99.3507239 | 100.287546 |
| 99.9012082 | 100.026166 | 99.5336264 | 100.288791 |
| 99.8826097 | 100.172607 | 100.052408 | 100.210008 |
| 100.123878 | 100.72021  | 99.749605  | 99.7628411 |
| 100.291776 | 100.602825 | 99.706488  | 100.135895 |
| 100.42606  | 100.704019 | 99.9667648 | 100.380809 |
| 100.153055 | 99.7150676 | 100.156164 | 100.049015 |
| 99.7060096 | 99.2841272 | 100.234917 | 99.8120419 |
| 100.558126 | 100.579117 | 99.9955094 | 100.365395 |
| 100.755543 | 100.496716 | 100.207353 | 100.16828  |
| 100.85536  | 100.666577 | 99.577334  | 100.120948 |
| 100.646341 | 100.614968 | 100.028585 | 100.248154 |
| 100.211751 | 99.9343687 | 100.08824  | 100.024103 |
| 100.418894 | 100.030069 | 99.7486206 | 100.114564 |
| 100.45046  | 99.5469416 | 99.7970533 | 100.20487  |
| 100.757591 | 100.431085 | 99.7688993 | 100.330986 |
| 100.566146 | 99.7328488 | 99.6064724 | 99.9654051 |
| 100.446877 | 99.8330305 | 100.155968 | 100.091365 |
| 100.535774 | 99.7697122 | 99.9994471 | 100.110205 |
| 100.633715 | 100.133286 | 99.9870435 | 100.370844 |
| 100.655726 | 99.9443435 | 100.016773 | 100.091521 |
| 100.736774 | 100.572756 | 99.8490299 | 100.240369 |
| 100.655896 | 100.355768 | 99.736217  | 100.061938 |

|            |            |            |            |
|------------|------------|------------|------------|
| 100.46138  | 100.288546 | 99.7066849 | 100.222619 |
| 100.419064 | 100.208748 | 100.049652 | 100.023792 |
| 100.406438 | 100.189088 | 100.298313 | 100.096815 |
| 100.318564 | 99.8768329 | 100.226648 | 100.523118 |
| 100.463257 | 99.9793276 | 99.9998408 | 100.221685 |
| 100.544817 | 99.5719509 | 100.067962 | 100.148662 |
| 100.865769 | 100.096423 | 100.072884 | 100.688625 |
| 100.511204 | 100.262959 | 100.053786 | 100.619184 |
| 100.246048 | 100.13054  | 100.103007 | 100.449784 |
| 100.244341 | 100.163934 | 99.9069129 | 100.072993 |
| 100.613069 | 100.463756 | 100.127026 | 100.485127 |
| 100.529973 | 100.379332 | 100.032129 | 100.151154 |
| 100.422818 | 100.006505 | 100.026617 | 99.9921853 |
| 100.624159 | 100.478357 | 99.9275855 | 100.290504 |
| 100.38255  | 100.059126 | 100.027601 | 100.124529 |
| 100.553861 | 100.595452 | 100.168765 | 100.341417 |
| 100.351496 | 100.109289 | 100.182546 | 100.141189 |
| 100.351837 | 100.100326 | 99.8214666 | 100.198019 |
| 100.310204 | 100.357503 | 99.7964627 | 100.143213 |
| 100.303208 | 100.152369 | 99.9285699 | 100.107402 |
| 100.132409 | 100.135455 | 99.8466673 | 100.436082 |
| 99.9361869 | 100.009397 | 100.035673 | 100.15925  |
| 99.9093983 | 99.96863   | 99.9116381 | 100.013205 |
| 99.9796971 | 99.9207798 | 99.8407609 | 100.292372 |
| 99.8848279 | 99.9702202 | 99.8291449 | 100.2863   |
| 100.067229 | 99.8486432 | 99.9525894 | 100.061004 |
| 99.9024026 | 99.9469456 | 100.253227 | 100.135895 |
| 100.051702 | 100.052621 | 100.20755  | 99.9615126 |
| 99.9425002 | 100.025443 | 100.035476 | 100.054776 |
| 99.7322863 | 99.9262732 | 100.089815 | 100.076418 |
| 99.8167473 | 100.086882 | 99.9352638 | 100.006821 |
| 99.7718721 | 99.9754244 | 99.7074724 | 99.9976347 |
| 99.9597336 | 100.187497 | 99.819104  | 99.917917  |
| 99.7350164 | 100.095267 | 99.910063  | 99.6991603 |
| 99.7519086 | 100.176944 | 100.071112 | 100.054776 |
| 99.7121522 | 100.05291  | 100.198297 | 100.017564 |
| 99.8387583 | 99.9550411 | 100.042761 | 100.016319 |
| 99.9614399 | 100.062596 | 99.9773964 | 99.9031256 |
| 99.7645351 | 99.8042626 | 99.9508174 | 99.7538106 |
| 100.033445 | 100.247057 | 100.000038 | 99.8515893 |
| 100.028838 | 100.29245  | 100.079775 | 99.9612012 |
| 99.9134934 | 100.374417 | 99.7216478 | 99.9759926 |
| 99.9056445 | 100.239974 | 99.9460923 | 99.6929324 |
| 100.080197 | 100.329313 | 100.100644 | 99.6915311 |
| 100.043853 | 100.154537 | 100.289256 | 99.6135261 |
| 99.8848279 | 100.073871 | 99.9838935 | 99.7573916 |

99.7836454 100.097724 99.7192853 99.6224009  
99.683828 99.9885796 100.048864 99.656966  
99.8097515 100.114927 99.9732619 99.7435345  
99.7928593 99.9638594 100.084303 100.065208  
99.5990258 99.7308249 99.8167414 99.9431402  
99.4137237 99.3815622 99.9651897 99.5651038  
99.6377584 99.3428195 100.06934 99.8825734  
99.5744554 99.665049 99.8427297 99.8884899  
99.5689953 99.4075835 99.7249948 99.8531463  
99.7875698 99.5356657 100.276656 99.9235221  
99.5386235 99.4074389 100.340839 99.4534678  
99.4120174 99.447049 100.074459 99.5859674  
99.5161006 99.6080914 99.8685211 99.4425689  
99.4616702 99.4675768 99.7915406 99.6300301  
99.3176601 99.7514973 100.214441 99.7902441  
99.4055336 99.6170543 99.9657804 99.1995233  
99.4290802 99.6147413 99.9569207 99.3626955  
99.3429131 99.6890464 100.22212 99.4450601  
99.3778918 99.9621247 99.7562989 99.9853345  
99.5771854 100.389306 100.046305 100.08903  
99.226886 99.8304284 100.483184 99.7321685  
99.178257 99.7212838 100.114622 99.9348881  
99.2099938 99.6104044 100.116985 99.9803522  
99.2231321 99.5310397 100.117182 99.923055  
99.2035099 99.6540623 99.9974782 99.8279231  
99.1572697 99.7036472 99.8413515 99.9387806  
99.1813283 99.6173434 100.12427 99.7583258  
99.2886533 99.8460411 100.385137 99.7318571  
99.17365 99.9723886 100.173687 99.7278089  
99.4845566 100.034969 99.6285758 100.101145  
99.5256946 100.062561 99.6414458 100.116806  
99.4895531 100.120069 99.6355215 100.143478  
99.5191991 100.3191 99.725611 100.045166  
99.4201016 100.149365 100.280039 99.9032798  
99.4647371 100.174012 100.352356 99.7843438  
99.7177272 100.439386 100.200981 100.04315  
99.7906763 100.310884 100.416502 99.9789522  
99.9030978 100.429466 100.119472 99.9391001  
99.9175877 100.014353 99.8179477 99.8573801  
99.5703301 99.7035613 99.4882323 99.9071564  
99.6732582 99.9525048 99.5290892 99.9056058  
99.9067619 100.005208 99.5728061 99.8780039  
100.010523 100.156961 99.4878237 99.9180111  
99.948566 99.9742059 99.6637128 99.9439072  
100.016019 100.367462 99.2185767 100.081296  
100.07681 100.550217 99.1785369 99.9603442

|            |            |            |            |
|------------|------------|------------|------------|
| 100.027344 | 100.632527 | 99.4065185 | 99.7590679 |
| 100.082639 | 100.500769 | 99.6590142 | 99.8355157 |
| 99.9595584 | 100.471008 | 99.8884258 | 99.8770735 |
| 100.108288 | 100.512395 | 100.050424 | 99.8697854 |
| 100.165415 | 100.547272 | 100.094345 | 99.9696482 |
| 99.8712867 | 100.396139 | 99.5004894 | 99.9811231 |
| 99.4146054 | 100.127199 | 99.4144856 | 100.07928  |
| 99.0781736 | 99.993427  | 99.4624925 | 100.15976  |
| 98.9327751 | 99.7818405 | 99.5869018 | 100.007795 |
| 99.3894563 | 99.8148573 | 100.047564 | 100.085948 |
| 99.6416136 | 99.920108  | 100.38259  | 100.144718 |
| 99.8542985 | 100.176957 | 100.510064 | 100.264585 |
| 99.9125912 | 100.343436 | 100.511494 | 100.121303 |
| 100.084804 | 100.382963 | 100.562361 | 100.156813 |
| 100.1864   | 100.330725 | 100.385859 | 99.9839143 |
| 100.142098 | 100.543862 | 100.287394 | 100.077109 |
| 100.222875 | 100.491004 | 100.174629 | 100.192944 |
| 99.9459012 | 100.588969 | 99.8575789 | 100.193409 |
| 100.049662 | 100.310109 | 99.6271458 | 100.237603 |
| 100.044832 | 99.9518847 | 99.4432897 | 100.197286 |
| 99.6670959 | 99.5170862 | 99.3701558 | 100.30118  |
| 99.4527455 | 99.7948612 | 99.8279576 | 99.9766262 |
| 99.6629321 | 100.183002 | 100.011814 | 99.7677517 |
| 99.7105655 | 99.752389  | 100.22713  | 99.9116534 |
| 99.6004757 | 99.8294281 | 100.286577 | 100.133398 |
| 99.6484422 | 99.8577947 | 100.186068 | 100.020355 |
| 99.7851801 | 99.8509743 | 100.064519 | 100.015548 |
| 100.166414 | 100.224079 | 100.239591 | 99.9791073 |
| 100.174742 | 100.204393 | 100.275749 | 100.040359 |
| 100.071314 | 100.091237 | 100.267987 | 99.9687178 |
| 99.7978379 | 100.021018 | 99.91151   | 99.9446825 |
| 99.6654303 | 99.9287885 | 99.9413355 | 99.9211124 |
| 99.515535  | 99.9492496 | 100.113547 | 99.7300705 |
| 99.8086637 | 100.056205 | 100.157264 | 99.7911667 |
| 99.884111  | 99.9354539 | 100.126622 | 99.9769363 |
| 99.8368107 | 99.8213677 | 99.8976186 | 100.153092 |
| 99.915256  | 99.8184225 | 100.201594 | 100.092771 |
| 99.9059291 | 99.678915  | 100.21855  | 99.9842245 |
| 99.8712867 | 99.8660101 | 100.13847  | 99.8719563 |
| 99.9970322 | 99.7663397 | 100.166253 | 99.9265397 |
| 100.064152 | 99.7385932 | 100.102516 | 99.871181  |
| 100.129773 | 99.7939312 | 100.343163 | 99.8913396 |
| 100.144929 | 99.7734701 | 100.009158 | 100.134019 |
| 100.00436  | 99.7613794 | 99.6733142 | 100.214653 |
| 99.9928685 | 99.8475641 | 99.9615597 | 99.9984906 |
| 100.013521 | 99.9500246 | 100.089238 | 99.9180111 |



|            |            |            |            |
|------------|------------|------------|------------|
| 100.505344 | 100.053415 | 100.096388 | 99.8914947 |
| 100.404748 | 100.272132 | 99.9627854 | 99.9321221 |
| 100.568966 | 100.544017 | 100.10701  | 99.8088443 |
| 100.828785 | 100.796525 | 100.3926   | 99.6229196 |
| 100.419071 | 100.50511  | 100.20282  | 99.8531933 |
| 100.281667 | 100.14642  | 100.139083 | 99.9325873 |
| 100.145762 | 99.7978064 | 99.9672797 | 99.8793995 |
| 100.141765 | 99.6641892 | 100.076368 | 99.8888586 |
| 100.010356 | 99.8802709 | 100.08127  | 99.9991108 |
| 99.9827089 | 99.5646738 | 100.178306 | 100.076489 |
| 100.1386   | 99.6195468 | 100.124579 | 100.135104 |
| 100.490688 | 100.003038 | 100.064111 | 100.132468 |
| 100.735017 | 100.33336  | 100.333358 | 100.075869 |
| 100.485025 | 100.159751 | 100.151953 | 99.9881011 |
| 100.196393 | 99.9556049 | 100.027952 | 99.8721114 |
| 99.9487326 | 99.5887001 | 99.945217  | 99.798765  |
| 100.027511 | 99.8108271 | 99.9787196 | 99.9925981 |
| 99.9197528 | 99.8681802 | 100.147254 | 100.034776 |
| 99.9757138 | 100.015748 | 100.118246 | 100.034776 |
| 100.040002 | 100.177887 | 99.9725911 | 100.03214  |
| 100.133604 | 99.7843207 | 100.136632 | 100.194184 |
| 100.180737 | 99.512901  | 99.954614  | 100.265205 |
| 100.328301 | 99.698601  | 99.8189691 | 100.256211 |
| 100.378932 | 99.9904818 | 99.7321481 | 100.067495 |
| 100.314644 | 99.8215227 | 99.9852567 | 99.8686999 |
| 99.9259152 | 99.5276268 | 100.284329 | 99.7423208 |
| 99.8857765 | 99.5284018 | 100.189541 | 99.8052778 |
| 99.8572964 | 99.6782949 | 100.13418  | 99.8643581 |
| 100.095297 | 99.8798058 | 100.167683 | 99.7243331 |
| 100.029176 | 100.032024 | 100.290458 | 99.7675966 |
| 100.086303 | 99.8114471 | 100.487797 | 99.955072  |
| 100.265678 | 99.5235966 | 100.579725 | 99.9935284 |
| 100.280668 | 99.5651388 | 99.9613554 | 100.215894 |
| 100.288495 | 99.5153811 | 99.6240816 | 100.334365 |
| 100.164915 | 99.4518277 | 99.6114159 | 100.343979 |
| 100.123611 | 99.5652938 | 99.6490043 | 100.294357 |
| 100.280668 | 99.6224919 | 99.968914  | 100.182865 |
| 100.535125 | 100.022583 | 100.227637 | 100.19416  |
| 100.49335  | 100.071243 | 100.29748  | 100.114209 |
| 100.47831  | 100.199968 | 100.674882 | 100.179878 |
| 100.191728 | 100.028646 | 100.722465 | 100.135943 |
| 100.201922 | 100.05694  | 100.357317 | 100.161869 |
| 100.173347 | 100.101559 | 100.288699 | 100.066859 |
| 100.300178 | 100.285007 | 100.028929 | 100.070895 |
| 100.290988 | 100.562823 | 100.179645 | 100.015628 |
| 100.410801 | 100.095651 | 100.152483 | 100.0518   |

|            |            |            |            |
|------------|------------|------------|------------|
| 100.414978 | 100.109798 | 99.9115018 | 100.060494 |
| 100.722615 | 100.241166 | 100.381824 | 100.170873 |
| 101.026075 | 100.677712 | 100.655889 | 99.9920307 |
| 100.946868 | 100.914796 | 99.8769884 | 100.011436 |
| 100.950711 | 100.745961 | 99.7164703 | 99.9305535 |
| 100.846272 | 100.547121 | 99.4164688 | 100.013765 |
| 100.722949 | 100.187842 | 99.6543869 | 100.048695 |
| 100.425004 | 99.8674285 | 100.326684 | 100.217913 |
| 100.38891  | 99.9669261 | 99.9427477 | 100.100237 |
| 100.254058 | 100.136849 | 100.065281 | 100.033171 |
| 100.471292 | 99.9645941 | 100.164328 | 100.08347  |
| 100.564034 | 100.277545 | 100.164328 | 100.127094 |
| 100.772412 | 100.312836 | 100.898096 | 99.9122346 |
| 100.809342 | 100.195771 | 100.915659 | 99.9468543 |
| 100.82906  | 100.582723 | 100.561539 | 100.068722 |
| 100.665967 | 100.561424 | 100.216813 | 100.268523 |
| 100.219635 | 100.049167 | 100.077534 | 100.336365 |
| 99.92052   | 100.076373 | 99.9010865 | 100.333571 |
| 99.8145766 | 99.6788495 | 99.901495  | 100.291033 |
| 99.5196394 | 99.2917417 | 99.9415224 | 100.188882 |
| 99.8941177 | 99.4865393 | 99.909868  | 100.046056 |
| 99.9109951 | 99.5959867 | 99.9842047 | 100.052732 |
| 100.036322 | 100.052121 | 99.7995884 | 99.9629998 |
| 100.086955 | 100.062693 | 100.034239 | 99.8318174 |
| 100.134245 | 99.8350918 | 100.408169 | 99.9057143 |
| 100.306863 | 100.046524 | 100.45228  | 99.9966881 |
| 100.303019 | 99.8528148 | 100.359564 | 100.036586 |
| 99.951267  | 99.818457  | 100.119604 | 100.053818 |
| 99.7873387 | 99.5409521 | 100.184954 | 100.129268 |
| 99.7801533 | 99.4277736 | 100.034443 | 100.20689  |
| 99.6601732 | 99.3413351 | 99.8808686 | 100.224278 |
| 99.7662837 | 99.7721285 | 100.00238  | 100.057079 |
| 99.6700323 | 99.7514516 | 100.089991 | 100.10831  |
| 99.6770506 | 99.7369934 | 100.25051  | 100.192453 |
| 99.860697  | 99.6726309 | 99.9652121 | 100.280787 |
| 99.8657101 | 100.042482 | 99.8040813 | 100.210772 |
| 99.9008018 | 100.002528 | 100.199454 | 100.031929 |
| 99.9016373 | 99.9075385 | 100.596869 | 99.8824275 |
| 99.5863136 | 99.6757402 | 100.255002 | 99.9443704 |
| 99.5634205 | 99.588058  | 100.104491 | 99.8873953 |
| 99.5328406 | 99.6236594 | 100.281347 | 99.7958005 |
| 99.6944294 | 99.8745799 | 100.153913 | 99.8745099 |
| 99.975664  | 100.131563 | 99.8500311 | 99.9170472 |
| 99.9955493 | 99.9723674 | 99.6043526 | 100.157833 |
| 100.247374 | 99.8612099 | 99.9409097 | 100.242442 |
| 100.172512 | 99.8447306 | 100.174948 | 100.067635 |

99.897961 99.6690552 99.7887647 99.9075772  
99.8949532 99.4521816 99.9627614 100.053353  
100.006244 99.6650131 99.9255931 99.8470315  
100.054704 99.7135182 99.7011536 99.8456343  
99.8754021 99.6376513 99.7573146 100.094648  
99.6075357 99.7993349 99.7332164 100.037052  
99.802378 99.9219967 99.919058 100.074  
100.110683 100.07202 100.270115 99.8605379  
100.34797 100.201367 100.548469 99.8718708  
100.448399 100.42959 100.140434 99.9620684  
100.261745 100.198413 99.5710645 99.9010569  
100.044845 99.947493 99.4362783 100.022148  
100.105336 99.9807625 99.5553395 99.872647  
100.001899 100.23417 99.636007 99.6584083  
99.7976991 100.266818 99.696865 99.8575882  
99.6842361 100.183644 99.8390032 99.8977968  
99.7741376 100.169497 100.22539 99.9134765  
100.019946 100.047457 100.476991 99.9394025  
99.8479972 100.129542 100.406943 100.081763  
99.567598 99.8358691 99.7673214 100.289015  
99.7933545 99.9583755 99.2220499 100.262158  
99.7729679 100.011078 99.5095938 100.221173  
99.7799862 100.044348 99.6423378 100.151002  
99.8936164 99.9756321 99.4375036 100.088438  
100.108344 100.173539 100.002585 100.008332  
100.534123 100.423993 100.240298 99.7667696  
100.086119 100.166388 99.8455383 99.7729794  
100.058881 100.219868 99.7959124 99.7374282  
99.7453958 100.339265 100.122258 99.6834028  
99.6123817 100.298377 100.132061 99.8204845  
99.6414577 100.183489 100.067323 99.7812074  
99.6324341 100.122547 100.153504 99.8437713  
99.7851664 100.069533 100.202109 99.9015226  
99.418542 99.6550634 99.5665717 100.038139  
99.3892989 99.9597747 99.4705875 100.078347  
99.3341549 99.7262663 99.5822967 100.008487  
99.2561177 99.7683973 99.7389346 99.9555481  
99.4665006 99.8731807 99.8949599 99.8858429  
99.7562575 100.138093 100.344247 99.7582311  
99.9079872 100.078861 100.151666 99.6386921  
99.6085383 99.8027551 99.7742649 99.7869515  
99.3916384 99.7651326 99.565959 99.8937604  
99.2751675 99.8601217 99.6907383 99.7500031  
99.0512492 99.9824726 99.9956411 99.8083754  
99.0633972 99.5910858 99.8317121 99.6409418  
99.2291795 99.4298339 99.9526439 99.7528563

99.1953225 99.1728821 99.8278374 99.7932137  
99.5620782 99.4174655 99.6063671 99.8034583  
99.8706267 99.7789296 99.3940738 100.020302  
100.132809 99.9315237 99.3781671 99.9752881  
100.272907 100.092003 99.8039774 99.821464  
100.357633 100.088447 99.7250556 99.6280585  
100.125471 99.7820217 99.5427403 99.8047001  
100.077771 99.5406849 99.4935927 99.9535572  
100.168334 99.9476026 99.5019539 99.7436982  
99.8991465 99.9700201 99.7487118 99.7545637  
99.466178 99.7064204 99.8557761 99.7921272  
99.4678458 99.543004 99.7177141 99.8447472  
99.1030915 99.0921788 99.8963586 100.043275  
99.1057601 98.9782357 99.7383112 100.252824  
99.3612715 99.2393618 99.6544951 100.357598  
99.5900977 99.4568895 99.7246478 100.301563  
99.9176594 99.7835677 99.6069789 100.103346  
99.7785625 99.7640876 99.7648224 100.016577  
100.210364 100.066184 99.7138394 100.119799  
100.188181 99.9650728 99.9991404 99.815876  
99.7608835 99.6988448 99.8506778 99.8639946  
99.8254285 99.3502128 99.6253328 99.918322  
99.7270265 99.7328576 100.010357 99.8689617  
100.039244 99.8936458 100.390486 99.7410595  
99.8087502 99.6974533 100.693937 99.7811065  
99.616783 99.4935307 100.389467 99.9276352  
99.6956713 99.5264613 100.348476 99.9318262  
99.6980063 99.4848729 100.167384 99.8222401  
100.090947 99.8421626 99.7189377 99.8064075  
100.224373 99.9256488 99.5863818 99.8029927  
99.7787292 99.7801665 99.4201771 99.8064075  
99.7572142 99.6754996 99.7511589 99.9608526  
99.8796329 99.920083 100.105389 99.8042344  
100.240384 100.038819 100.160043 99.9167698  
100.170169 99.8297943 100.327675 100.040791  
99.9023154 99.6009804 100.594418 99.9735807  
99.8752966 99.6220066 99.9298035 99.9974848  
99.8329337 99.6680786 99.9257248 99.8906926  
99.8644557 99.6795193 99.9605972 99.895194  
99.9375066 99.6815291 99.6285957 99.9676823  
100.107292 99.987645 99.8488424 99.9692345  
100.379648 100.028151 100.221223 99.9420708  
100.210364 99.9976942 100.581978 99.7904198  
100.230377 99.8924089 100.135163 99.943623  
100.077104 99.7956268 99.8333436 100.075095  
99.7373671 99.6798285 99.9936342 100.04669

99.8908074 99.6182961 100.078062 100.191666  
99.9251647 99.655401 99.7399427 100.311031  
100.169668 99.9612077 99.7574808 100.294268  
100.24422 100.485161 100.338891 99.865702  
100.201524 100.21816 100.342154 99.7191733  
100.068431 100.25913 100.068885 99.7921272  
100.322108 100.512525 99.8180487 99.6306972  
100.212865 100.340297 99.6024924 99.9006268  
100.064929 100.094476 99.9016609 99.8399353  
100.174172 99.9675465 100.24549 99.7111018  
100.124971 100.19667 99.9860888 99.8354339  
99.9441779 100.27258 99.9563147 99.7745872  
100.101788 100.115657 99.8098914 99.7848318  
99.8107516 100.029388 99.8102993 99.8992298  
99.943344 99.9392539 100.327879 99.8251893  
100.034908 100.031862 100.360508 99.8582514  
99.9838723 99.8735473 100.031158 99.8883643  
99.8029128 99.8599421 100.166773 100.1555  
100.107458 100.035263 100.046453 100.179249  
100.267737 100.004342 99.982418 100.192132  
100.337285 100.271962 100.270778 100.271295  
100.228042 100.211357 99.9565186 100.303736  
100.501567 100.339678 99.7260753 100.107381  
100.512241 100.454085 99.6799866 100.233266  
100.475382 100.475575 100.384368 100.031168  
100.105624 100.459651 99.9979168 99.9551094  
99.7879023 100.523812 99.9920028 100.076027  
100.043747 100.432904 100.38967 100.020147  
100.141816 100.33303 100.420056 100.174437  
100.043747 100.467381 100.22367 100.061902  
99.8147544 100.241814 99.8045892 100.333228  
99.7698898 99.9485302 99.9683467 100.259808  
99.9253315 100.029543 100.346641 100.166676  
99.9286671 100.054279 100.235294 100.031789  
99.7306958 100.101897 100.154537 99.9135101  
99.9803698 100.193577 100.094173 99.928877  
100.15816 100.196979 100.161878 100.017043  
100.18668 100.24707 100.515904 100.061436  
100.203192 100.402911 100.000772 100.234352  
100.35363 100.632962 99.681822 100.269898  
100.190683 100.688929 99.8066285 100.219451  
100.105123 100.626159 100.332366 100.087358  
99.9953803 100.587972 100.335017 100.137805  
99.9656929 100.607298 100.191041 100.27114  
99.8247613 100.317106 100.019126 100.382278  
99.9338374 100.268715 99.7319893 100.332607

99.9094871 100.053197 99.8451717 100.254065  
100.028737 99.9689379 100.165753 100.060505  
100.155158 100.098651 99.9236855 100.174592  
100.356299 100.346172 100.315847 100.130354  
100.352129 100.407859 100.270166 100.010523  
100.560608 100.534788 100.09193 100.151154  
100.407501 100.62415 100.114362 100.278745  
100.170369 100.783645 100.173309 100.119798  
100.448749 100.680043 100.397716 100.2023  
100.57677 100.63531 100.441045 100.126622  
100.505425 100.607352 99.8201425 100.294262  
100.410242 100.584208 100.132024 100.295813  
100.413076 100.432767 100.212958 100.322486  
100.692623 100.383218 100.162068 100.30093  
100.540931 100.355726 100.251177 100.004265  
100.578604 100.574112 99.7845806 99.9760403  
99.9958397 100.491479 99.9744483 99.9611528  
99.9141594 100.409624 100.61681 99.9273456  
100.025011 100.458861 100.27468 100.05327  
100.164034 100.705206 99.9885505 100.004265  
100.158367 100.63034 100.141834 99.9485914  
100.173869 100.492722 100.490096 99.8981908  
100.47642 100.448455 100.267118 100.194236  
100.325561 100.191703 100.100754 100.187413  
100.282221 99.617469 99.7226539 100.427785  
99.8468149 99.4251774 99.7490187 100.485319  
99.6299454 99.4217602 99.8336315 100.168183  
99.5742694 99.3386617 99.8540693 100.154691  
99.7169599 99.5536307 99.9895723 100.070173  
99.7526325 99.3944232 100.066827 100.144456  
99.8561498 99.7474755 100.297775 99.9777462  
100.19904 100.028147 100.435526 99.9788317  
100.331896 100.162658 100.264257 100.102274  
100.1602 100.102392 100.222155 100.007987  
99.999507 99.7960921 100.160433 100.019152  
100.17537 99.6225947 99.9977475 100.200129  
100.247548 99.7296132 100.073776 100.214396  
100.189705 99.8487471 100.649511 100.24169  
100.281887 99.826691 100.426125 100.297209  
99.8716524 99.9156919 100.000404 100.235952  
99.861484 99.8116245 99.9241712 100.040708  
100.109692 99.9719193 99.9409302 100.119953  
100.465251 100.383218 99.8434416 100.110494  
100.341897 100.38881 99.9350033 99.9413027  
100.282054 100.277287 100.1169 99.9383562  
100.501091 100.44131 100.376665 99.9237788

|            |            |            |            |
|------------|------------|------------|------------|
| 100.598107 | 100.763453 | 100.051703 | 99.9837943 |
| 100.658284 | 100.624748 | 99.7300115 | 99.786534  |
| 100.424411 | 100.573801 | 99.960755  | 99.7649781 |
| 100.308392 | 100.282568 | 99.9010764 | 99.8172396 |
| 100.318394 | 100.236281 | 100.23544  | 99.9611528 |
| 100.216543 | 99.7010335 | 100.41284  | 99.9549496 |
| 99.8838211 | 99.3773375 | 100.091966 | 100.088938 |
| 99.9993403 | 99.6443401 | 99.7197926 | 100.164306 |
| 100.251716 | 99.9511059 | 100.004288 | 100.101034 |
| 100.145198 | 99.7016548 | 100.005309 | 100.058697 |
| 99.3579    | 99.2532333 | 99.834449  | 100.012484 |
| 99.679787  | 99.4708428 | 99.8299527 | 100.152055 |
| 99.8226442 | 99.4904136 | 100.288783 | 100.169889 |
| 100.126528 | 99.7238662 | 100.688138 | 100.204937 |
| 99.9458314 | 99.6792881 | 100.032083 | 100.119023 |
| 100.198374 | 100.137495 | 99.416086  | 100.034815 |
| 100.107525 | 100.312235 | 99.5924647 | 99.7642027 |
| 99.7494653 | 100.062473 | 99.9674995 | 99.5733007 |
| 99.6259447 | 100.011838 | 100.358884 | 99.7545878 |
| 99.7768032 | 100.02473  | 100.173513 | 99.914474  |
| 100.015843 | 100.166696 | 100.075616 | 99.88687   |
| 99.8913223 | 100.122118 | 100.018185 | 99.772732  |
| 99.7966399 | 100.146349 | 99.8078798 | 99.7815715 |
| 99.8779867 | 100.124914 | 99.8642883 | 99.8484105 |
| 99.845648  | 99.85496   | 99.9805797 | 99.9003619 |
| 99.9209939 | 99.9456695 | 99.7343035 | 100.007366 |
| 100.106191 | 100.118856 | 100.320257 | 99.9779013 |
| 100.111192 | 99.9526591 | 100.609044 | 100.030008 |
| 100.097023 | 99.9466014 | 100.382388 | 100.161204 |
| 99.7137927 | 99.6535043 | 99.9462441 | 100.237813 |
| 99.4687518 | 99.4674256 | 99.7453399 | 99.9847247 |
| 99.5579334 | 99.5627948 | 100.175966 | 99.8812872 |
| 99.835813  | 99.7296132 | 100.093397 | 99.8220471 |
| 99.8024742 | 99.8822971 | 100.097075 | 99.7914966 |
| 99.5719357 | 99.5165081 | 100.118126 | 99.8865599 |
| 99.6526158 | 99.566212  | 100.00858  | 99.7918067 |
| 99.5869382 | 99.4897923 | 99.9977475 | 99.8936935 |
| 99.8586502 | 99.8235845 | 99.7287853 | 99.9924787 |
| 100.244048 | 100.365511 | 99.9364339 | 99.7103904 |
| 100.226712 | 100.251659 | 100.109543 | 99.7457483 |
| 100.440914 | 100.17353  | 99.9957037 | 99.7852934 |
| 100.302391 | 100.388033 | 99.6689023 | 99.6733265 |
| 100.417743 | 100.240009 | 99.4937499 | 99.8685707 |
| 100.177037 | 100.085461 | 99.7042598 | 99.9053244 |
| 99.6312789 | 99.8686286 | 99.9149742 | 99.8842337 |
| 99.663451  | 99.9057511 | 100.110769 | 99.8341432 |

|            |            |            |            |
|------------|------------|------------|------------|
| 99.9925058 | 100.083908 | 99.9282588 | 99.8479452 |
| 100.21871  | 100.313322 | 99.3948306 | 99.8056087 |
| 100.329895 | 100.634533 | 99.1360873 | 99.7576894 |
| 99.8559831 | 100.563395 | 99.3823635 | 99.642776  |
| 99.7142928 | 100.533106 | 99.613107  | 99.6184286 |
| 99.8433143 | 100.308507 | 99.9155873 | 99.7286897 |
| 99.8428142 | 100.108449 | 99.8702152 | 100.018532 |
| 100.027012 | 100.335223 | 99.8988282 | 100.150349 |
| 100.175536 | 100.323729 | 100.107294 | 100.180279 |
| 99.9508322 | 100.027215 | 99.9826235 | 100.200749 |
| 99.5972733 | 99.5806571 | 99.7473837 | 100.396459 |
| 99.1426975 | 99.4818708 | 99.8530474 | 100.413363 |
| 99.0958563 | 99.5728909 | 99.8242301 | 100.206332 |
| 99.1815373 | 99.4410205 | 99.8097192 | 100.169424 |
| 99.2987235 | 99.3734544 | 99.6705374 | 100.170354 |
